# Supplementary material for: How the Position of Substitution Affects Intermolecular Bonding in Halogen Derivatives of Carboranes: Crystal Structures of 1,2,3- and 8,9,12-Triiodo- and 8,9,12-Tribromo ortho-Carboranes
Source: Molecules. 2023 Jan 15;28(2):875. doi: 10.3390/molecules28020875 (PMC9865681; doi:10.3390/molecules28020875)
Supplement: Supplementary file 1 [file molecules-28-00875-s001.zip]

Archive with 7 entries (7 files):
- checkcif_40.pdf
- checkcif_42.pdf
- checkcif_75.pdf
- siv40.cif
- siv42.cif
- siv75.cif
- Supplementary Materials.pdf
