# Supplementary material for: How the Position of Substitution Affects Intermolecular Bonding in Halogen Derivatives of Carboranes: Crystal Structures of 1,2,3- and 8,9,12-Triiodo- and 8,9,12-Tribromo ortho-Carboranes
Source: Molecules. 2023 Jan 15;28(2):875. doi: 10.3390/molecules28020875 (PMC9865681; doi:10.3390/molecules28020875)
Supplement: Supplementary file 1 [file molecules-28-00875-s001.zip › siv40.cif]

 
data_siv40
 
_audit_creation_method            SHELXL-2014/6
_chemical_name_systematic         ?
_chemical_name_common             ?
_chemical_melting_point           ?
_chemical_formula_moiety          
 'C2 H9 B10 I3' 
_chemical_formula_sum
 'C2 H9 B10 I3' 
_chemical_formula_weight          521.89

loop_
 _atom_type_symbol
 _atom_type_description
 _atom_type_scat_dispersion_real
 _atom_type_scat_dispersion_imag
 _atom_type_scat_source
 'C'  'C'   0.0033   0.0016
 'International Tables Vol C Tables 4.2.6.8 and 6.1.1.4'
 'H'  'H'   0.0000   0.0000
 'International Tables Vol C Tables 4.2.6.8 and 6.1.1.4'
 'B'  'B'   0.0013   0.0007
 'International Tables Vol C Tables 4.2.6.8 and 6.1.1.4'
 'I'  'I'  -0.4742   1.8119
 'International Tables Vol C Tables 4.2.6.8 and 6.1.1.4'
 
_space_group_crystal_system       monoclinic
_space_group_IT_number            14
_space_group_name_H-M_alt         'P 21/n'
_space_group_name_Hall            '-P 2yn'
 
_shelx_space_group_comment
;
The symmetry employed for this shelxl refinement is uniquely defined
by the following loop, which should always be used as a source of
symmetry information in preference to the above space-group names.
They are only intended as comments.
;
 
loop_
 _space_group_symop_operation_xyz
 'x, y, z'
 '-x+1/2, y+1/2, -z+1/2'
 '-x, -y, -z'
 'x-1/2, -y-1/2, z-1/2'
 
_cell_length_a                    7.5776(6)
_cell_length_b                    24.0030(18)
_cell_length_c                    7.7535(6)
_cell_angle_alpha                 90
_cell_angle_beta                  109.487(2)
_cell_angle_gamma                 90
_cell_volume                      1329.46(18)
_cell_formula_units_Z             4
_cell_measurement_temperature     120(2)
_cell_measurement_reflns_used     6683
_cell_measurement_theta_min       2.91
_cell_measurement_theta_max       26.1
 
_exptl_crystal_description        'prizm'
_exptl_crystal_colour             'colorless'
_exptl_crystal_density_meas       ?
_exptl_crystal_density_method     ?
_exptl_crystal_density_diffrn     2.607          
_exptl_crystal_F_000              920
_exptl_transmission_factor_min    ?
_exptl_transmission_factor_max    ?
_exptl_crystal_size_max           0.12
_exptl_crystal_size_mid           0.10
_exptl_crystal_size_min           0.06
_exptl_absorpt_coefficient_mu     7.006
_shelx_estimated_absorpt_T_min    ?
_shelx_estimated_absorpt_T_max    ?
_exptl_absorpt_correction_type    'multi-scan'
_exptl_absorpt_correction_T_min   0.393
_exptl_absorpt_correction_T_max   0.657
_exptl_absorpt_process_details    'SADABS-2014/5 (Bruker,2014/5)' 
_exptl_absorpt_special_details    ?
_diffrn_ambient_temperature       120(2)
_diffrn_radiation_wavelength      0.71073
_diffrn_radiation_type            MoK\a
_diffrn_source                    'sealed tube'
_diffrn_measurement_device_type   'Bruker APEX-II CCD' 
_diffrn_measurement_method        '\f and \w scans' 
_diffrn_detector_area_resol_mean  ?
_diffrn_reflns_number             8787
_diffrn_reflns_av_unetI/netI      0.0317
_diffrn_reflns_av_R_equivalents   0.0289
_diffrn_reflns_limit_h_min        -9
_diffrn_reflns_limit_h_max        9
_diffrn_reflns_limit_k_min        -29
_diffrn_reflns_limit_k_max        29
_diffrn_reflns_limit_l_min        -9
_diffrn_reflns_limit_l_max        9
_diffrn_reflns_theta_min          2.913
_diffrn_reflns_theta_max          26.069
_diffrn_reflns_theta_full         25.242
_diffrn_measured_fraction_theta_max   0.993
_diffrn_measured_fraction_theta_full  0.994
_diffrn_reflns_Laue_measured_fraction_max    0.993
_diffrn_reflns_Laue_measured_fraction_full   0.994
_diffrn_reflns_point_group_measured_fraction_max   0.993
_diffrn_reflns_point_group_measured_fraction_full  0.994
_reflns_number_total              2611
_reflns_number_gt                 2331
_reflns_threshold_expression      'I > 2\s(I)'
_reflns_Friedel_coverage          0.000
_reflns_Friedel_fraction_max      .
_reflns_Friedel_fraction_full     .
 
_reflns_special_details
;
 Reflections were merged by SHELXL according to the crystal
 class for the calculation of statistics and refinement.
 
 _reflns_Friedel_fraction is defined as the number of unique
 Friedel pairs measured divided by the number that would be
 possible theoretically, ignoring centric projections and
 systematic absences.
;
 
_computing_data_collection        'APEX (Bruker, 2014)' 
_computing_cell_refinement        'SAINT (Bruker, 2014)' 
_computing_data_reduction         'SAINT (Bruker, 2014)'
_computing_structure_solution   'SHELXL-2014/6 (Sheldrick, 2014)'
_computing_structure_refinement 'SHELXL-2014/6 (Sheldrick, 2014)'
_computing_molecular_graphics   'SHELXL-2014/6 (Sheldrick, 2014)'
_computing_publication_material   
'SHELXL-2014/6 (Sheldrick, 2014) and PLATON (Spek, 2015)'
_refine_special_details           ?
_refine_ls_structure_factor_coef  Fsqd
_refine_ls_matrix_type            full
_refine_ls_weighting_scheme       calc
_refine_ls_weighting_details
'w=1/[\s^2^(Fo^2^)+(0.0229P)^2^+12.3134P] where P=(Fo^2^+2Fc^2^)/3'
_atom_sites_solution_primary      direct
_atom_sites_solution_secondary    difmap
_atom_sites_solution_hydrogens    geom
_refine_ls_hydrogen_treatment     constr
_refine_ls_extinction_method      none
_refine_ls_extinction_coef        .
_refine_ls_number_reflns          2611
_refine_ls_number_parameters      136
_refine_ls_number_restraints      0
_refine_ls_R_factor_all           0.0390
_refine_ls_R_factor_gt            0.0343
_refine_ls_wR_factor_ref          0.0794
_refine_ls_wR_factor_gt           0.0781
_refine_ls_goodness_of_fit_ref    1.117
_refine_ls_restrained_S_all       1.117
_refine_ls_shift/su_max           0.000
_refine_ls_shift/su_mean          0.000
 
loop_
 _atom_site_label
 _atom_site_type_symbol
 _atom_site_fract_x
 _atom_site_fract_y
 _atom_site_fract_z
 _atom_site_U_iso_or_equiv
 _atom_site_adp_type
 _atom_site_occupancy
 _atom_site_site_symmetry_order  
 _atom_site_calc_flag
 _atom_site_refinement_flags_posn
 _atom_site_refinement_flags_adp
 _atom_site_refinement_flags_occupancy
 _atom_site_disorder_assembly
 _atom_site_disorder_group
I8 I 1.42794(7) 0.19722(2) 1.14287(6) 0.02734(13) Uani 1 1 d . . . . .
I9 I 1.29926(7) 0.02830(2) 1.09184(6) 0.02525(13) Uani 1 1 d . . . . .
I12 I 0.88002(6) 0.14978(2) 0.96151(6) 0.02254(13) Uani 1 1 d . . . . .
C1 C 1.3323(12) 0.1097(3) 1.6543(10) 0.0301(17) Uani 1 1 d . . . . .
H1 H 1.4237 0.1018 1.7989 0.036 Uiso 1 1 calc R U . . .
C2 C 1.1665(11) 0.1571(3) 1.6054(9) 0.0277(16) Uani 1 1 d . . . . .
H2 H 1.1416 0.1826 1.7160 0.033 Uiso 1 1 calc R U . . .
B3 B 1.3664(12) 0.1706(3) 1.5536(10) 0.0244(17) Uani 1 1 d . . . . .
H3 H 1.4729 0.2030 1.6222 0.029 Uiso 1 1 calc R U . . .
B4 B 1.4303(11) 0.1049(3) 1.4846(10) 0.0197(15) Uani 1 1 d . . . . .
H4 H 1.5798 0.0941 1.5052 0.024 Uiso 1 1 calc R U . . .
B5 B 1.2652(12) 0.0545(3) 1.5108(10) 0.0210(16) Uani 1 1 d . . . . .
H5 H 1.3073 0.0105 1.5515 0.025 Uiso 1 1 calc R U . . .
B6 B 1.1076(14) 0.0896(4) 1.5868(10) 0.029(2) Uani 1 1 d . . . . .
H6 H 1.0433 0.0688 1.6807 0.035 Uiso 1 1 calc R U . . .
B7 B 1.1375(11) 0.1874(3) 1.3977(9) 0.0169(15) Uani 1 1 d . . . . .
H7 H 1.0938 0.2316 1.3611 0.020 Uiso 1 1 calc R U . . .
B8 B 1.3030(11) 0.1539(3) 1.3184(10) 0.0172(15) Uani 1 1 d . . . . .
B9 B 1.2425(11) 0.0815(3) 1.2919(9) 0.0165(14) Uani 1 1 d . . . . .
B10 B 1.0419(11) 0.0702(3) 1.3567(9) 0.0175(15) Uani 1 1 d . . . . .
H10 H 0.9370 0.0369 1.2929 0.021 Uiso 1 1 calc R U . . .
B11 B 0.9772(12) 0.1375(3) 1.4247(11) 0.0230(17) Uani 1 1 d . . . . .
H11 H 0.8289 0.1488 1.4079 0.028 Uiso 1 1 calc R U . . .
B12 B 1.0613(10) 0.1331(3) 1.2375(9) 0.0148(14) Uani 1 1 d . . . . .
 
loop_
 _atom_site_aniso_label
 _atom_site_aniso_U_11
 _atom_site_aniso_U_22
 _atom_site_aniso_U_33
 _atom_site_aniso_U_23
 _atom_site_aniso_U_13
 _atom_site_aniso_U_12
I8 0.0283(3) 0.0288(3) 0.0285(3) 0.00500(19) 0.0142(2) -0.0065(2)
I9 0.0339(3) 0.0246(2) 0.0174(2) -0.00279(17) 0.00883(19) 0.0097(2)
I12 0.0211(2) 0.0296(3) 0.0150(2) 0.00245(17) 0.00340(17) 0.00508(19)
C1 0.044(5) 0.028(4) 0.021(4) 0.005(3) 0.015(3) 0.010(3)
C2 0.036(4) 0.033(4) 0.017(3) 0.005(3) 0.013(3) 0.012(3)
B3 0.031(5) 0.026(4) 0.013(3) -0.005(3) 0.004(3) 0.001(3)
B4 0.022(4) 0.021(4) 0.017(3) -0.002(3) 0.007(3) 0.004(3)
B5 0.030(4) 0.019(4) 0.017(4) 0.003(3) 0.011(3) 0.005(3)
B6 0.049(5) 0.032(5) 0.011(3) 0.007(3) 0.014(4) 0.015(4)
B7 0.028(4) 0.012(3) 0.013(3) -0.001(3) 0.010(3) 0.005(3)
B8 0.020(4) 0.016(4) 0.016(3) 0.001(3) 0.006(3) -0.003(3)
B9 0.024(4) 0.016(4) 0.010(3) 0.001(3) 0.007(3) 0.000(3)
B10 0.023(4) 0.018(4) 0.012(3) 0.006(3) 0.007(3) -0.001(3)
B11 0.026(4) 0.026(4) 0.025(4) 0.001(3) 0.018(3) 0.005(3)
B12 0.017(4) 0.019(3) 0.011(3) 0.000(3) 0.007(3) 0.004(3)
 
_geom_special_details
;
 All esds (except the esd in the dihedral angle between two l.s. planes)
 are estimated using the full covariance matrix.  The cell esds are taken
 into account individually in the estimation of esds in distances, angles
 and torsion angles; correlations between esds in cell parameters are only
 used when they are defined by crystal symmetry.  An approximate (isotropic)
 treatment of cell esds is used for estimating esds involving l.s. planes.
;
 
loop_
 _geom_bond_atom_site_label_1
 _geom_bond_atom_site_label_2
 _geom_bond_distance
 _geom_bond_site_symmetry_2
 _geom_bond_publ_flag
I8 B8 2.165(7) . ?
I9 B9 2.160(7) . ?
I12 B12 2.160(7) . ?
C1 C2 1.643(10) . ?
C1 B6 1.676(13) . ?
C1 B5 1.694(11) . ?
C1 B3 1.717(11) . ?
C1 B4 1.717(10) . ?
C1 H1 1.1200 . ?
C2 B6 1.673(12) . ?
C2 B7 1.713(9) . ?
C2 B11 1.703(12) . ?
C2 B3 1.723(12) . ?
C2 H2 1.1200 . ?
B3 B8 1.770(10) . ?
B3 B4 1.783(11) . ?
B3 B7 1.798(11) . ?
B3 H3 1.1200 . ?
B4 B8 1.774(11) . ?
B4 B9 1.776(11) . ?
B4 B5 1.799(11) . ?
B4 H4 1.1200 . ?
B5 B6 1.718(11) . ?
B5 B9 1.770(10) . ?
B5 B10 1.756(11) . ?
B5 H5 1.1200 . ?
B6 B11 1.746(11) . ?
B6 B10 1.748(10) . ?
B6 H6 1.1200 . ?
B7 B8 1.764(10) . ?
B7 B11 1.767(11) . ?
B7 B12 1.760(10) . ?
B7 H7 1.1200 . ?
B8 B9 1.793(10) . ?
B8 B12 1.798(11) . ?
B9 B12 1.792(10) . ?
B9 B10 1.774(10) . ?
B10 B11 1.817(11) . ?
B10 B12 1.801(10) . ?
B10 H10 1.1200 . ?
B11 B12 1.772(10) . ?
B11 H11 1.1200 . ?
 
loop_
 _geom_angle_atom_site_label_1
 _geom_angle_atom_site_label_2
 _geom_angle_atom_site_label_3
 _geom_angle
 _geom_angle_site_symmetry_1
 _geom_angle_site_symmetry_3
 _geom_angle_publ_flag
C2 C1 B6 60.5(5) . . ?
C2 C1 B5 110.5(6) . . ?
B6 C1 B5 61.3(5) . . ?
C2 C1 B3 61.6(5) . . ?
B6 C1 B3 113.2(6) . . ?
B5 C1 B3 115.1(5) . . ?
C2 C1 B4 111.3(5) . . ?
B6 C1 B4 113.3(6) . . ?
B5 C1 B4 63.6(4) . . ?
B3 C1 B4 62.6(4) . . ?
C2 C1 H1 121.2 . . ?
B6 C1 H1 119.3 . . ?
B5 C1 H1 118.4 . . ?
B3 C1 H1 117.5 . . ?
B4 C1 H1 118.3 . . ?
C1 C2 B6 60.7(5) . . ?
C1 C2 B7 111.0(5) . . ?
B6 C2 B7 112.5(5) . . ?
C1 C2 B11 111.6(6) . . ?
B6 C2 B11 62.3(5) . . ?
B7 C2 B11 62.3(4) . . ?
C1 C2 B3 61.3(5) . . ?
B6 C2 B3 113.0(6) . . ?
B7 C2 B3 63.1(4) . . ?
B11 C2 B3 115.1(5) . . ?
C1 C2 H2 120.9 . . ?
B6 C2 H2 119.2 . . ?
B7 C2 H2 119.1 . . ?
B11 C2 H2 118.0 . . ?
B3 C2 H2 117.5 . . ?
C2 B3 C1 57.1(5) . . ?
C2 B3 B8 103.9(6) . . ?
C1 B3 B8 104.3(5) . . ?
C2 B3 B4 104.6(6) . . ?
C1 B3 B4 58.7(4) . . ?
B8 B3 B4 59.9(4) . . ?
C2 B3 B7 58.2(4) . . ?
C1 B3 B7 103.8(6) . . ?
B8 B3 B7 59.2(4) . . ?
B4 B3 B7 107.1(5) . . ?
C2 B3 H3 124.8 . . ?
C1 B3 H3 124.7 . . ?
B8 B3 H3 123.4 . . ?
B4 B3 H3 122.2 . . ?
B7 B3 H3 122.9 . . ?
C1 B4 B8 104.1(5) . . ?
C1 B4 B9 103.6(6) . . ?
B8 B4 B9 60.7(4) . . ?
C1 B4 B3 58.7(4) . . ?
B8 B4 B3 59.7(4) . . ?
B9 B4 B3 108.1(5) . . ?
C1 B4 B5 57.6(4) . . ?
B8 B4 B5 107.3(5) . . ?
B9 B4 B5 59.3(4) . . ?
B3 B4 B5 106.9(5) . . ?
C1 B4 H4 125.5 . . ?
B8 B4 H4 122.4 . . ?
B9 B4 H4 122.4 . . ?
B3 B4 H4 121.6 . . ?
B5 B4 H4 122.5 . . ?
C1 B5 B6 58.8(5) . . ?
C1 B5 B9 104.9(5) . . ?
B6 B5 B9 107.1(5) . . ?
C1 B5 B10 106.8(6) . . ?
B6 B5 B10 60.4(4) . . ?
B9 B5 B10 60.4(4) . . ?
C1 B5 B4 58.8(4) . . ?
B6 B5 B4 107.4(6) . . ?
B9 B5 B4 59.7(4) . . ?
B10 B5 B4 109.1(5) . . ?
C1 B5 H5 123.9 . . ?
B6 B5 H5 122.1 . . ?
B9 B5 H5 122.9 . . ?
B10 B5 H5 120.9 . . ?
B4 B5 H5 121.5 . . ?
C2 B6 C1 58.8(5) . . ?
C2 B6 B5 107.9(6) . . ?
C1 B6 B5 59.9(5) . . ?
C2 B6 B11 59.7(5) . . ?
C1 B6 B11 107.9(6) . . ?
B5 B6 B11 111.5(5) . . ?
C2 B6 B10 108.9(5) . . ?
C1 B6 B10 108.0(6) . . ?
B5 B6 B10 60.9(4) . . ?
B11 B6 B10 62.7(4) . . ?
C2 B6 H6 122.5 . . ?
C1 B6 H6 122.8 . . ?
B5 B6 H6 120.5 . . ?
B11 B6 H6 119.8 . . ?
B10 B6 H6 120.5 . . ?
C2 B7 B8 104.6(5) . . ?
C2 B7 B11 58.6(4) . . ?
B8 B7 B11 109.3(5) . . ?
C2 B7 B12 104.9(5) . . ?
B8 B7 B12 61.4(4) . . ?
B11 B7 B12 60.3(4) . . ?
C2 B7 B3 58.7(4) . . ?
B8 B7 B3 59.6(4) . . ?
B11 B7 B3 108.4(5) . . ?
B12 B7 B3 108.9(5) . . ?
C2 B7 H7 125.1 . . ?
B8 B7 H7 121.8 . . ?
B11 B7 H7 121.0 . . ?
B12 B7 H7 121.6 . . ?
B3 B7 H7 121.4 . . ?
B3 B8 B4 60.4(4) . . ?
B3 B8 B7 61.2(4) . . ?
B4 B8 B7 109.0(5) . . ?
B3 B8 B9 107.9(5) . . ?
B4 B8 B9 59.7(4) . . ?
B7 B8 B9 107.3(5) . . ?
B3 B8 B12 108.5(5) . . ?
B4 B8 B12 108.2(5) . . ?
B7 B8 B12 59.2(4) . . ?
B9 B8 B12 59.9(4) . . ?
B3 B8 I8 121.0(5) . . ?
B4 B8 I8 121.9(5) . . ?
B7 B8 I8 120.8(4) . . ?
B9 B8 I8 122.9(4) . . ?
B12 B8 I8 121.5(4) . . ?
B4 B9 B5 61.0(4) . . ?
B4 B9 B12 108.4(5) . . ?
B5 B9 B12 107.5(5) . . ?
B4 B9 B8 59.6(4) . . ?
B5 B9 B8 107.8(5) . . ?
B12 B9 B8 60.2(4) . . ?
B4 B9 B10 109.4(5) . . ?
B5 B9 B10 59.4(4) . . ?
B12 B9 B10 60.7(4) . . ?
B8 B9 B10 109.0(5) . . ?
B4 B9 I9 119.7(5) . . ?
B5 B9 I9 119.6(4) . . ?
B12 B9 I9 124.1(4) . . ?
B8 B9 I9 123.4(4) . . ?
B10 B9 I9 120.6(5) . . ?
B6 B10 B11 58.6(4) . . ?
B6 B10 B12 104.8(5) . . ?
B11 B10 B12 58.7(4) . . ?
B6 B10 B5 58.7(4) . . ?
B11 B10 B5 106.6(5) . . ?
B12 B10 B5 107.7(5) . . ?
B6 B10 B9 105.6(6) . . ?
B11 B10 B9 106.7(5) . . ?
B12 B10 B9 60.2(4) . . ?
B5 B10 B9 60.2(4) . . ?
B6 B10 H10 124.1 . . ?
B11 B10 H10 122.9 . . ?
B12 B10 H10 122.6 . . ?
B5 B10 H10 121.9 . . ?
B9 B10 H10 122.2 . . ?
C2 B11 B6 58.0(5) . . ?
C2 B11 B12 104.8(5) . . ?
B6 B11 B12 106.1(5) . . ?
C2 B11 B7 59.1(4) . . ?
B6 B11 B7 106.5(6) . . ?
B12 B11 B7 59.6(4) . . ?
C2 B11 B10 104.4(5) . . ?
B6 B11 B10 58.7(4) . . ?
B12 B11 B10 60.2(4) . . ?
B7 B11 B10 107.8(5) . . ?
C2 B11 H11 124.5 . . ?
B6 B11 H11 123.2 . . ?
B12 B11 H11 122.7 . . ?
B7 B11 H11 121.7 . . ?
B10 B11 H11 122.5 . . ?
B11 B12 B7 60.0(4) . . ?
B11 B12 B9 107.8(5) . . ?
B7 B12 B9 107.5(5) . . ?
B11 B12 B10 61.1(4) . . ?
B7 B12 B10 108.8(5) . . ?
B9 B12 B10 59.2(4) . . ?
B11 B12 B8 107.5(5) . . ?
B7 B12 B8 59.4(4) . . ?
B9 B12 B8 59.9(4) . . ?
B10 B12 B8 107.6(5) . . ?
B11 B12 I12 121.1(5) . . ?
B7 B12 I12 120.8(4) . . ?
B9 B12 I12 123.1(4) . . ?
B10 B12 I12 122.0(5) . . ?
B8 B12 I12 122.1(4) . . ?
 
loop_
 _geom_torsion_atom_site_label_1
 _geom_torsion_atom_site_label_2
 _geom_torsion_atom_site_label_3
 _geom_torsion_atom_site_label_4
 _geom_torsion
 _geom_torsion_site_symmetry_1
 _geom_torsion_site_symmetry_2
 _geom_torsion_site_symmetry_3
 _geom_torsion_site_symmetry_4
 _geom_torsion_publ_flag
B5 C1 C2 B6 36.8(5) . . . . ?
B3 C1 C2 B6 145.0(6) . . . . ?
B4 C1 C2 B6 105.5(6) . . . . ?
B6 C1 C2 B7 -104.8(6) . . . . ?
B5 C1 C2 B7 -67.9(7) . . . . ?
B3 C1 C2 B7 40.2(6) . . . . ?
B4 C1 C2 B7 0.8(8) . . . . ?
B6 C1 C2 B11 -37.3(5) . . . . ?
B5 C1 C2 B11 -0.5(8) . . . . ?
B3 C1 C2 B11 107.7(6) . . . . ?
B4 C1 C2 B11 68.2(8) . . . . ?
B6 C1 C2 B3 -145.0(6) . . . . ?
B5 C1 C2 B3 -108.2(6) . . . . ?
B4 C1 C2 B3 -39.5(6) . . . . ?
B6 C2 B3 C1 -32.9(5) . . . . ?
B7 C2 B3 C1 -137.5(6) . . . . ?
B11 C2 B3 C1 -101.9(6) . . . . ?
C1 C2 B3 B8 98.2(6) . . . . ?
B6 C2 B3 B8 65.2(7) . . . . ?
B7 C2 B3 B8 -39.3(5) . . . . ?
B11 C2 B3 B8 -3.8(8) . . . . ?
C1 C2 B3 B4 36.1(5) . . . . ?
B6 C2 B3 B4 3.2(7) . . . . ?
B7 C2 B3 B4 -101.3(5) . . . . ?
B11 C2 B3 B4 -65.8(7) . . . . ?
C1 C2 B3 B7 137.5(6) . . . . ?
B6 C2 B3 B7 104.5(6) . . . . ?
B11 C2 B3 B7 35.5(5) . . . . ?
B6 C1 B3 C2 32.9(5) . . . . ?
B5 C1 B3 C2 100.8(7) . . . . ?
B4 C1 B3 C2 138.1(6) . . . . ?
C2 C1 B3 B8 -97.5(6) . . . . ?
B6 C1 B3 B8 -64.6(7) . . . . ?
B5 C1 B3 B8 3.3(8) . . . . ?
B4 C1 B3 B8 40.6(5) . . . . ?
C2 C1 B3 B4 -138.1(6) . . . . ?
B6 C1 B3 B4 -105.2(6) . . . . ?
B5 C1 B3 B4 -37.3(6) . . . . ?
C2 C1 B3 B7 -36.3(5) . . . . ?
B6 C1 B3 B7 -3.3(7) . . . . ?
B5 C1 B3 B7 64.6(7) . . . . ?
B4 C1 B3 B7 101.9(5) . . . . ?
C2 C1 B4 B8 -1.3(8) . . . . ?
B6 C1 B4 B8 64.6(7) . . . . ?
B5 C1 B4 B8 101.8(6) . . . . ?
B3 C1 B4 B8 -40.4(5) . . . . ?
C2 C1 B4 B9 -64.0(7) . . . . ?
B6 C1 B4 B9 1.9(7) . . . . ?
B5 C1 B4 B9 39.1(5) . . . . ?
B3 C1 B4 B9 -103.1(6) . . . . ?
C2 C1 B4 B3 39.1(6) . . . . ?
B6 C1 B4 B3 105.0(7) . . . . ?
B5 C1 B4 B3 142.2(6) . . . . ?
C2 C1 B4 B5 -103.1(7) . . . . ?
B6 C1 B4 B5 -37.2(6) . . . . ?
B3 C1 B4 B5 -142.2(6) . . . . ?
C2 B3 B4 C1 -35.4(5) . . . . ?
B8 B3 B4 C1 -133.2(6) . . . . ?
B7 B3 B4 C1 -96.1(6) . . . . ?
C2 B3 B4 B8 97.8(6) . . . . ?
C1 B3 B4 B8 133.2(6) . . . . ?
B7 B3 B4 B8 37.2(5) . . . . ?
C2 B3 B4 B9 59.9(6) . . . . ?
C1 B3 B4 B9 95.2(6) . . . . ?
B8 B3 B4 B9 -38.0(5) . . . . ?
B7 B3 B4 B9 -0.8(7) . . . . ?
C2 B3 B4 B5 -2.7(7) . . . . ?
C1 B3 B4 B5 32.7(5) . . . . ?
B8 B3 B4 B5 -100.5(6) . . . . ?
B7 B3 B4 B5 -63.4(6) . . . . ?
C2 C1 B5 B6 -36.5(5) . . . . ?
B3 C1 B5 B6 -103.9(7) . . . . ?
B4 C1 B5 B6 -140.7(6) . . . . ?
C2 C1 B5 B9 64.7(7) . . . . ?
B6 C1 B5 B9 101.2(6) . . . . ?
B3 C1 B5 B9 -2.7(8) . . . . ?
B4 C1 B5 B9 -39.5(5) . . . . ?
C2 C1 B5 B10 1.7(7) . . . . ?
B6 C1 B5 B10 38.2(5) . . . . ?
B3 C1 B5 B10 -65.7(7) . . . . ?
B4 C1 B5 B10 -102.6(6) . . . . ?
C2 C1 B5 B4 104.3(6) . . . . ?
B6 C1 B5 B4 140.7(6) . . . . ?
B3 C1 B5 B4 36.9(6) . . . . ?
B8 B4 B5 C1 -95.9(6) . . . . ?
B9 B4 B5 C1 -134.5(6) . . . . ?
B3 B4 B5 C1 -33.2(5) . . . . ?
C1 B4 B5 B6 34.6(5) . . . . ?
B8 B4 B5 B6 -61.3(7) . . . . ?
B9 B4 B5 B6 -100.0(6) . . . . ?
B3 B4 B5 B6 1.4(7) . . . . ?
C1 B4 B5 B9 134.5(6) . . . . ?
B8 B4 B5 B9 38.6(5) . . . . ?
B3 B4 B5 B9 101.4(6) . . . . ?
C1 B4 B5 B10 98.5(6) . . . . ?
B8 B4 B5 B10 2.6(7) . . . . ?
B9 B4 B5 B10 -36.0(5) . . . . ?
B3 B4 B5 B10 65.3(6) . . . . ?
B7 C2 B6 C1 102.3(6) . . . . ?
B11 C2 B6 C1 140.5(6) . . . . ?
B3 C2 B6 C1 33.2(5) . . . . ?
C1 C2 B6 B5 -35.5(5) . . . . ?
B7 C2 B6 B5 66.8(7) . . . . ?
B11 C2 B6 B5 104.9(6) . . . . ?
B3 C2 B6 B5 -2.4(8) . . . . ?
C1 C2 B6 B11 -140.5(6) . . . . ?
B7 C2 B6 B11 -38.2(6) . . . . ?
B3 C2 B6 B11 -107.3(6) . . . . ?
C1 C2 B6 B10 -100.1(6) . . . . ?
B7 C2 B6 B10 2.2(8) . . . . ?
B11 C2 B6 B10 40.4(5) . . . . ?
B3 C2 B6 B10 -66.9(7) . . . . ?
B5 C1 B6 C2 -140.2(5) . . . . ?
B3 C1 B6 C2 -33.3(5) . . . . ?
B4 C1 B6 C2 -102.1(6) . . . . ?
C2 C1 B6 B5 140.2(5) . . . . ?
B3 C1 B6 B5 106.9(6) . . . . ?
B4 C1 B6 B5 38.1(6) . . . . ?
C2 C1 B6 B11 35.3(5) . . . . ?
B5 C1 B6 B11 -105.0(6) . . . . ?
B3 C1 B6 B11 2.0(8) . . . . ?
B4 C1 B6 B11 -66.8(7) . . . . ?
C2 C1 B6 B10 101.6(6) . . . . ?
B5 C1 B6 B10 -38.7(5) . . . . ?
B3 C1 B6 B10 68.2(7) . . . . ?
B4 C1 B6 B10 -0.6(8) . . . . ?
C1 B5 B6 C2 35.1(5) . . . . ?
B9 B5 B6 C2 -62.3(7) . . . . ?
B10 B5 B6 C2 -102.0(6) . . . . ?
B4 B5 B6 C2 0.5(7) . . . . ?
B9 B5 B6 C1 -97.4(6) . . . . ?
B10 B5 B6 C1 -137.1(6) . . . . ?
B4 B5 B6 C1 -34.6(5) . . . . ?
C1 B5 B6 B11 98.8(7) . . . . ?
B9 B5 B6 B11 1.5(9) . . . . ?
B10 B5 B6 B11 -38.3(6) . . . . ?
B4 B5 B6 B11 64.3(8) . . . . ?
C1 B5 B6 B10 137.1(6) . . . . ?
B9 B5 B6 B10 39.8(5) . . . . ?
B4 B5 B6 B10 102.5(6) . . . . ?
C1 C2 B7 B8 0.2(8) . . . . ?
B6 C2 B7 B8 -65.7(7) . . . . ?
B11 C2 B7 B8 -103.9(6) . . . . ?
B3 C2 B7 B8 39.6(5) . . . . ?
C1 C2 B7 B11 104.1(6) . . . . ?
B6 C2 B7 B11 38.2(6) . . . . ?
B3 C2 B7 B11 143.5(6) . . . . ?
C1 C2 B7 B12 63.9(7) . . . . ?
B6 C2 B7 B12 -2.1(8) . . . . ?
B11 C2 B7 B12 -40.2(5) . . . . ?
B3 C2 B7 B12 103.3(6) . . . . ?
C1 C2 B7 B3 -39.4(6) . . . . ?
B6 C2 B7 B3 -105.4(6) . . . . ?
B11 C2 B7 B3 -143.5(6) . . . . ?
C1 B3 B7 C2 35.7(5) . . . . ?
B8 B3 B7 C2 134.3(6) . . . . ?
B4 B3 B7 C2 96.8(6) . . . . ?
C2 B3 B7 B8 -134.3(6) . . . . ?
C1 B3 B7 B8 -98.6(5) . . . . ?
B4 B3 B7 B8 -37.5(5) . . . . ?
C2 B3 B7 B11 -32.3(5) . . . . ?
C1 B3 B7 B11 3.4(6) . . . . ?
B8 B3 B7 B11 102.0(5) . . . . ?
B4 B3 B7 B11 64.5(6) . . . . ?
C2 B3 B7 B12 -96.4(6) . . . . ?
C1 B3 B7 B12 -60.6(6) . . . . ?
B8 B3 B7 B12 38.0(5) . . . . ?
B4 B3 B7 B12 0.5(7) . . . . ?
C2 B3 B8 B4 -99.0(6) . . . . ?
C1 B3 B8 B4 -40.0(5) . . . . ?
B7 B3 B8 B4 -137.8(6) . . . . ?
C2 B3 B8 B7 38.8(5) . . . . ?
C1 B3 B8 B7 97.8(6) . . . . ?
B4 B3 B8 B7 137.8(6) . . . . ?
C2 B3 B8 B9 -61.5(7) . . . . ?
C1 B3 B8 B9 -2.5(7) . . . . ?
B4 B3 B8 B9 37.5(5) . . . . ?
B7 B3 B8 B9 -100.3(6) . . . . ?
C2 B3 B8 B12 1.9(7) . . . . ?
C1 B3 B8 B12 60.9(7) . . . . ?
B4 B3 B8 B12 100.9(6) . . . . ?
B7 B3 B8 B12 -36.9(5) . . . . ?
C2 B3 B8 I8 149.3(5) . . . . ?
C1 B3 B8 I8 -151.6(5) . . . . ?
B4 B3 B8 I8 -111.7(6) . . . . ?
B7 B3 B8 I8 110.5(6) . . . . ?
C1 B4 B8 B3 39.9(5) . . . . ?
B9 B4 B8 B3 137.9(6) . . . . ?
B5 B4 B8 B3 99.8(6) . . . . ?
C1 B4 B8 B7 1.4(7) . . . . ?
B9 B4 B8 B7 99.3(6) . . . . ?
B3 B4 B8 B7 -38.5(5) . . . . ?
B5 B4 B8 B7 61.3(6) . . . . ?
C1 B4 B8 B9 -97.9(6) . . . . ?
B3 B4 B8 B9 -137.9(6) . . . . ?
B5 B4 B8 B9 -38.0(5) . . . . ?
C1 B4 B8 B12 -61.4(6) . . . . ?
B9 B4 B8 B12 36.5(5) . . . . ?
B3 B4 B8 B12 -101.4(6) . . . . ?
B5 B4 B8 B12 -1.5(7) . . . . ?
C1 B4 B8 I8 150.0(5) . . . . ?
B9 B4 B8 I8 -112.1(5) . . . . ?
B3 B4 B8 I8 110.1(6) . . . . ?
B5 B4 B8 I8 -150.1(5) . . . . ?
C2 B7 B8 B3 -39.2(5) . . . . ?
B11 B7 B8 B3 -100.5(6) . . . . ?
B12 B7 B8 B3 -138.5(5) . . . . ?
C2 B7 B8 B4 -1.0(7) . . . . ?
B11 B7 B8 B4 -62.3(7) . . . . ?
B12 B7 B8 B4 -100.3(6) . . . . ?
B3 B7 B8 B4 38.2(5) . . . . ?
C2 B7 B8 B9 62.2(6) . . . . ?
B11 B7 B8 B9 0.8(7) . . . . ?
B12 B7 B8 B9 -37.1(5) . . . . ?
B3 B7 B8 B9 101.3(6) . . . . ?
C2 B7 B8 B12 99.3(6) . . . . ?
B11 B7 B8 B12 38.0(5) . . . . ?
B3 B7 B8 B12 138.5(5) . . . . ?
C2 B7 B8 I8 -150.0(5) . . . . ?
B11 B7 B8 I8 148.7(5) . . . . ?
B12 B7 B8 I8 110.7(5) . . . . ?
B3 B7 B8 I8 -110.8(6) . . . . ?
C1 B4 B9 B5 -38.2(5) . . . . ?
B8 B4 B9 B5 -136.9(5) . . . . ?
B3 B4 B9 B5 -99.4(6) . . . . ?
C1 B4 B9 B12 62.0(6) . . . . ?
B8 B4 B9 B12 -36.7(5) . . . . ?
B3 B4 B9 B12 0.9(7) . . . . ?
B5 B4 B9 B12 100.2(5) . . . . ?
C1 B4 B9 B8 98.7(5) . . . . ?
B3 B4 B9 B8 37.5(5) . . . . ?
B5 B4 B9 B8 136.9(5) . . . . ?
C1 B4 B9 B10 -2.5(7) . . . . ?
B8 B4 B9 B10 -101.2(6) . . . . ?
B3 B4 B9 B10 -63.7(7) . . . . ?
B5 B4 B9 B10 35.7(5) . . . . ?
C1 B4 B9 I9 -147.7(4) . . . . ?
B8 B4 B9 I9 113.6(5) . . . . ?
B3 B4 B9 I9 151.1(5) . . . . ?
B5 B4 B9 I9 -109.5(5) . . . . ?
C1 B5 B9 B4 39.1(5) . . . . ?
B6 B5 B9 B4 100.5(6) . . . . ?
B10 B5 B9 B4 140.3(5) . . . . ?
C1 B5 B9 B12 -62.6(7) . . . . ?
B6 B5 B9 B12 -1.2(8) . . . . ?
B10 B5 B9 B12 38.5(5) . . . . ?
B4 B5 B9 B12 -101.7(6) . . . . ?
C1 B5 B9 B8 0.9(7) . . . . ?
B6 B5 B9 B8 62.3(7) . . . . ?
B10 B5 B9 B8 102.0(6) . . . . ?
B4 B5 B9 B8 -38.3(5) . . . . ?
C1 B5 B9 B10 -101.1(6) . . . . ?
B6 B5 B9 B10 -39.7(6) . . . . ?
B4 B5 B9 B10 -140.3(5) . . . . ?
C1 B5 B9 I9 148.8(5) . . . . ?
B6 B5 B9 I9 -149.8(5) . . . . ?
B10 B5 B9 I9 -110.1(6) . . . . ?
B4 B5 B9 I9 109.6(5) . . . . ?
B3 B8 B9 B4 -37.8(5) . . . . ?
B7 B8 B9 B4 -102.4(5) . . . . ?
B12 B8 B9 B4 -139.2(5) . . . . ?
I8 B8 B9 B4 110.6(6) . . . . ?
B3 B8 B9 B5 1.0(7) . . . . ?
B4 B8 B9 B5 38.9(5) . . . . ?
B7 B8 B9 B5 -63.5(6) . . . . ?
B12 B8 B9 B5 -100.3(5) . . . . ?
I8 B8 B9 B5 149.5(5) . . . . ?
B3 B8 B9 B12 101.4(6) . . . . ?
B4 B8 B9 B12 139.2(5) . . . . ?
B7 B8 B9 B12 36.8(4) . . . . ?
I8 B8 B9 B12 -110.2(5) . . . . ?
B3 B8 B9 B10 64.0(7) . . . . ?
B4 B8 B9 B10 101.8(5) . . . . ?
B7 B8 B9 B10 -0.5(7) . . . . ?
B12 B8 B9 B10 -37.4(5) . . . . ?
I8 B8 B9 B10 -147.5(5) . . . . ?
B3 B8 B9 I9 -145.3(5) . . . . ?
B4 B8 B9 I9 -107.5(6) . . . . ?
B7 B8 B9 I9 150.1(5) . . . . ?
B12 B8 B9 I9 113.3(5) . . . . ?
I8 B8 B9 I9 3.1(8) . . . . ?
C2 B6 B10 B11 -39.0(5) . . . . ?
C1 B6 B10 B11 -101.3(6) . . . . ?
B5 B6 B10 B11 -139.6(6) . . . . ?
C2 B6 B10 B12 -1.4(7) . . . . ?
C1 B6 B10 B12 -63.7(7) . . . . ?
B5 B6 B10 B12 -101.9(6) . . . . ?
B11 B6 B10 B12 37.7(5) . . . . ?
C2 B6 B10 B5 100.5(7) . . . . ?
C1 B6 B10 B5 38.2(5) . . . . ?
B11 B6 B10 B5 139.6(6) . . . . ?
C2 B6 B10 B9 61.2(7) . . . . ?
C1 B6 B10 B9 -1.1(7) . . . . ?
B5 B6 B10 B9 -39.3(5) . . . . ?
B11 B6 B10 B9 100.3(6) . . . . ?
C1 B5 B10 B6 -37.5(5) . . . . ?
B9 B5 B10 B6 -135.3(6) . . . . ?
B4 B5 B10 B6 -99.6(6) . . . . ?
C1 B5 B10 B11 -2.2(7) . . . . ?
B6 B5 B10 B11 35.3(5) . . . . ?
B9 B5 B10 B11 -100.0(5) . . . . ?
B4 B5 B10 B11 -64.3(6) . . . . ?
C1 B5 B10 B12 59.5(6) . . . . ?
B6 B5 B10 B12 97.0(6) . . . . ?
B9 B5 B10 B12 -38.4(5) . . . . ?
B4 B5 B10 B12 -2.6(7) . . . . ?
C1 B5 B10 B9 97.9(6) . . . . ?
B6 B5 B10 B9 135.3(6) . . . . ?
B4 B5 B10 B9 35.7(5) . . . . ?
B4 B9 B10 B6 2.3(7) . . . . ?
B5 B9 B10 B6 38.6(5) . . . . ?
B12 B9 B10 B6 -98.4(6) . . . . ?
B8 B9 B10 B6 -61.2(6) . . . . ?
I9 B9 B10 B6 147.1(5) . . . . ?
B4 B9 B10 B11 63.6(6) . . . . ?
B5 B9 B10 B11 99.9(6) . . . . ?
B12 B9 B10 B11 -37.1(5) . . . . ?
B8 B9 B10 B11 0.0(7) . . . . ?
I9 B9 B10 B11 -151.6(4) . . . . ?
B4 B9 B10 B12 100.7(5) . . . . ?
B5 B9 B10 B12 137.0(5) . . . . ?
B8 B9 B10 B12 37.2(5) . . . . ?
I9 B9 B10 B12 -114.5(5) . . . . ?
B4 B9 B10 B5 -36.3(5) . . . . ?
B12 B9 B10 B5 -137.0(5) . . . . ?
B8 B9 B10 B5 -99.9(5) . . . . ?
I9 B9 B10 B5 108.5(5) . . . . ?
C1 C2 B11 B6 36.7(6) . . . . ?
B7 C2 B11 B6 139.9(6) . . . . ?
B3 C2 B11 B6 104.0(7) . . . . ?
C1 C2 B11 B12 -63.3(7) . . . . ?
B6 C2 B11 B12 -100.0(6) . . . . ?
B7 C2 B11 B12 39.9(5) . . . . ?
B3 C2 B11 B12 4.0(8) . . . . ?
C1 C2 B11 B7 -103.2(6) . . . . ?
B6 C2 B11 B7 -139.9(6) . . . . ?
B3 C2 B11 B7 -35.9(5) . . . . ?
C1 C2 B11 B10 -0.9(7) . . . . ?
B6 C2 B11 B10 -37.5(5) . . . . ?
B7 C2 B11 B10 102.3(5) . . . . ?
B3 C2 B11 B10 66.5(7) . . . . ?
C1 B6 B11 C2 -34.9(5) . . . . ?
B5 B6 B11 C2 -98.8(7) . . . . ?
B10 B6 B11 C2 -136.3(6) . . . . ?
C2 B6 B11 B12 97.7(6) . . . . ?
C1 B6 B11 B12 62.8(7) . . . . ?
B5 B6 B11 B12 -1.1(8) . . . . ?
B10 B6 B11 B12 -38.7(5) . . . . ?
C2 B6 B11 B7 35.3(5) . . . . ?
C1 B6 B11 B7 0.4(7) . . . . ?
B5 B6 B11 B7 -63.5(8) . . . . ?
B10 B6 B11 B7 -101.1(6) . . . . ?
C2 B6 B11 B10 136.3(6) . . . . ?
C1 B6 B11 B10 101.4(6) . . . . ?
B5 B6 B11 B10 37.5(6) . . . . ?
B8 B7 B11 C2 95.7(6) . . . . ?
B12 B7 B11 C2 134.1(5) . . . . ?
B3 B7 B11 C2 32.4(5) . . . . ?
C2 B7 B11 B6 -34.8(5) . . . . ?
B8 B7 B11 B6 60.9(7) . . . . ?
B12 B7 B11 B6 99.3(6) . . . . ?
B3 B7 B11 B6 -2.4(7) . . . . ?
C2 B7 B11 B12 -134.1(5) . . . . ?
B8 B7 B11 B12 -38.4(5) . . . . ?
B3 B7 B11 B12 -101.7(5) . . . . ?
C2 B7 B11 B10 -96.5(6) . . . . ?
B8 B7 B11 B10 -0.8(7) . . . . ?
B12 B7 B11 B10 37.6(5) . . . . ?
B3 B7 B11 B10 -64.1(6) . . . . ?
B6 B10 B11 C2 37.2(5) . . . . ?
B12 B10 B11 C2 -99.1(6) . . . . ?
B5 B10 B11 C2 1.8(6) . . . . ?
B9 B10 B11 C2 -61.3(6) . . . . ?
B12 B10 B11 B6 -136.3(6) . . . . ?
B5 B10 B11 B6 -35.4(5) . . . . ?
B9 B10 B11 B6 -98.5(6) . . . . ?
B6 B10 B11 B12 136.3(6) . . . . ?
B5 B10 B11 B12 100.9(5) . . . . ?
B9 B10 B11 B12 37.8(5) . . . . ?
B6 B10 B11 B7 98.9(6) . . . . ?
B12 B10 B11 B7 -37.3(5) . . . . ?
B5 B10 B11 B7 63.6(6) . . . . ?
B9 B10 B11 B7 0.5(7) . . . . ?
C2 B11 B12 B7 -39.6(5) . . . . ?
B6 B11 B12 B7 -100.0(6) . . . . ?
B10 B11 B12 B7 -138.0(6) . . . . ?
C2 B11 B12 B9 60.7(6) . . . . ?
B6 B11 B12 B9 0.3(7) . . . . ?
B7 B11 B12 B9 100.3(6) . . . . ?
B10 B11 B12 B9 -37.6(5) . . . . ?
C2 B11 B12 B10 98.3(6) . . . . ?
B6 B11 B12 B10 37.9(5) . . . . ?
B7 B11 B12 B10 138.0(6) . . . . ?
C2 B11 B12 B8 -2.5(7) . . . . ?
B6 B11 B12 B8 -62.9(7) . . . . ?
B7 B11 B12 B8 37.1(5) . . . . ?
B10 B11 B12 B8 -100.9(5) . . . . ?
C2 B11 B12 I12 -149.7(5) . . . . ?
B6 B11 B12 I12 149.9(5) . . . . ?
B7 B11 B12 I12 -110.0(6) . . . . ?
B10 B11 B12 I12 112.0(6) . . . . ?
C2 B7 B12 B11 39.4(5) . . . . ?
B8 B7 B12 B11 138.1(5) . . . . ?
B3 B7 B12 B11 100.9(6) . . . . ?
C2 B7 B12 B9 -61.5(6) . . . . ?
B8 B7 B12 B9 37.2(5) . . . . ?
B11 B7 B12 B9 -100.8(5) . . . . ?
B3 B7 B12 B9 0.0(7) . . . . ?
C2 B7 B12 B10 1.1(7) . . . . ?
B8 B7 B12 B10 99.8(5) . . . . ?
B11 B7 B12 B10 -38.3(5) . . . . ?
B3 B7 B12 B10 62.6(6) . . . . ?
C2 B7 B12 B8 -98.7(5) . . . . ?
B11 B7 B12 B8 -138.1(5) . . . . ?
B3 B7 B12 B8 -37.2(5) . . . . ?
C2 B7 B12 I12 149.9(5) . . . . ?
B8 B7 B12 I12 -111.4(5) . . . . ?
B11 B7 B12 I12 110.5(5) . . . . ?
B3 B7 B12 I12 -148.6(5) . . . . ?
B4 B9 B12 B11 -63.9(6) . . . . ?
B5 B9 B12 B11 0.6(7) . . . . ?
B8 B9 B12 B11 -100.3(6) . . . . ?
B10 B9 B12 B11 38.5(5) . . . . ?
I9 B9 B12 B11 147.4(5) . . . . ?
B4 B9 B12 B7 -0.5(7) . . . . ?
B5 B9 B12 B7 63.9(6) . . . . ?
B8 B9 B12 B7 -37.0(5) . . . . ?
B10 B9 B12 B7 101.8(5) . . . . ?
I9 B9 B12 B7 -149.2(5) . . . . ?
B4 B9 B12 B10 -102.4(5) . . . . ?
B5 B9 B12 B10 -38.0(5) . . . . ?
B8 B9 B12 B10 -138.8(5) . . . . ?
I9 B9 B12 B10 108.9(6) . . . . ?
B4 B9 B12 B8 36.4(5) . . . . ?
B5 B9 B12 B8 100.9(5) . . . . ?
B10 B9 B12 B8 138.8(5) . . . . ?
I9 B9 B12 B8 -112.3(5) . . . . ?
B4 B9 B12 I12 147.2(5) . . . . ?
B5 B9 B12 I12 -148.3(5) . . . . ?
B8 B9 B12 I12 110.8(5) . . . . ?
B10 B9 B12 I12 -110.4(6) . . . . ?
I9 B9 B12 I12 -1.4(8) . . . . ?
B6 B10 B12 B11 -37.6(5) . . . . ?
B5 B10 B12 B11 -99.0(6) . . . . ?
B9 B10 B12 B11 -137.4(5) . . . . ?
B6 B10 B12 B7 0.1(7) . . . . ?
B11 B10 B12 B7 37.8(5) . . . . ?
B5 B10 B12 B7 -61.2(6) . . . . ?
B9 B10 B12 B7 -99.6(6) . . . . ?
B6 B10 B12 B9 99.7(6) . . . . ?
B11 B10 B12 B9 137.4(5) . . . . ?
B5 B10 B12 B9 38.4(5) . . . . ?
B6 B10 B12 B8 63.0(6) . . . . ?
B11 B10 B12 B8 100.7(6) . . . . ?
B5 B10 B12 B8 1.7(6) . . . . ?
B9 B10 B12 B8 -36.7(5) . . . . ?
B6 B10 B12 I12 -148.2(5) . . . . ?
B11 B10 B12 I12 -110.5(6) . . . . ?
B5 B10 B12 I12 150.4(4) . . . . ?
B9 B10 B12 I12 112.1(5) . . . . ?
B3 B8 B12 B11 0.4(7) . . . . ?
B4 B8 B12 B11 64.4(6) . . . . ?
B7 B8 B12 B11 -37.4(5) . . . . ?
B9 B8 B12 B11 100.8(5) . . . . ?
I8 B8 B12 B11 -146.9(5) . . . . ?
B3 B8 B12 B7 37.8(5) . . . . ?
B4 B8 B12 B7 101.8(5) . . . . ?
B9 B8 B12 B7 138.2(5) . . . . ?
I8 B8 B12 B7 -109.5(5) . . . . ?
B3 B8 B12 B9 -100.4(5) . . . . ?
B4 B8 B12 B9 -36.4(5) . . . . ?
B7 B8 B12 B9 -138.2(5) . . . . ?
I8 B8 B12 B9 112.3(5) . . . . ?
B3 B8 B12 B10 -64.1(6) . . . . ?
B4 B8 B12 B10 -0.1(6) . . . . ?
B7 B8 B12 B10 -101.8(5) . . . . ?
B9 B8 B12 B10 36.4(5) . . . . ?
I8 B8 B12 B10 148.7(4) . . . . ?
B3 B8 B12 I12 147.2(5) . . . . ?
B4 B8 B12 I12 -148.8(4) . . . . ?
B7 B8 B12 I12 109.4(5) . . . . ?
B9 B8 B12 I12 -112.4(5) . . . . ?
I8 B8 B12 I12 -0.1(7) . . . . ?
 
_refine_diff_density_max    2.062
_refine_diff_density_min   -1.052
_refine_diff_density_rms    0.187

_shelxl_version_number 2014/6

_shelx_res_file
;
TITL siv40 in P2(1)/n
CELL 0.71073   7.5776  24.0030   7.7535  90.000 109.487  90.000
ZERR    4.00   0.0006   0.0018   0.0006   0.000   0.002   0.000
LATT  1
SYMM 0.5-X, 0.5+Y, 0.5-Z
SFAC C H B I
UNIT 8 36 40 12
TEMP -153.000

ACTA
CONF
HTAB

L.S. 6
BOND $H
FMAP 2
PLAN 10

OMIT    -4   0   6
OMIT     0   6   5
OMIT     0   2   1
OMIT    -1   2   2

OMIT    -2   0   6
OMIT     0   6   0

WGHT    0.022900   12.313400
FVAR       0.09920
I8    4    1.427940    0.197225    1.142866    11.00000    0.02831    0.02878 =
         0.02848    0.00500    0.01419   -0.00650
I9    4    1.299255    0.028303    1.091840    11.00000    0.03393    0.02461 =
         0.01743   -0.00279    0.00883    0.00968
I12   4    0.880023    0.149784    0.961507    11.00000    0.02109    0.02961 =
         0.01496    0.00245    0.00340    0.00508
C1    1    1.332266    0.109665    1.654316    11.00000    0.04441    0.02750 =
         0.02133    0.00477    0.01476    0.00953
AFIX 153
H1    2    1.423737    0.101773    1.798885    11.00000   -1.20000
AFIX   0
C2    1    1.166458    0.157088    1.605437    11.00000    0.03642    0.03279 =
         0.01664    0.00455    0.01271    0.01170
AFIX 153
H2    2    1.141572    0.182624    1.716029    11.00000   -1.20000
AFIX   0
B3    3    1.366396    0.170556    1.553589    11.00000    0.03142    0.02602 =
         0.01304   -0.00451    0.00363    0.00149
AFIX 153
H3    2    1.472930    0.202992    1.622219    11.00000   -1.20000
AFIX   0
B4    3    1.430286    0.104876    1.484551    11.00000    0.02205    0.02107 =
         0.01655   -0.00188    0.00715    0.00388
AFIX 153
H4    2    1.579753    0.094100    1.505181    11.00000   -1.20000
AFIX   0
B5    3    1.265214    0.054543    1.510776    11.00000    0.02991    0.01905 =
         0.01677    0.00349    0.01136    0.00490
AFIX 153
H5    2    1.307344    0.010451    1.551480    11.00000   -1.20000
AFIX   0
B6    3    1.107581    0.089629    1.586790    11.00000    0.04860    0.03151 =
         0.01074    0.00687    0.01433    0.01469
AFIX 153
H6    2    1.043294    0.068797    1.680717    11.00000   -1.20000
AFIX   0
B7    3    1.137541    0.187402    1.397730    11.00000    0.02763    0.01196 =
         0.01316   -0.00100    0.00958    0.00480
AFIX 153
H7    2    1.093834    0.231624    1.361070    11.00000   -1.20000
AFIX   0
B8    3    1.302993    0.153938    1.318361    11.00000    0.02045    0.01572 =
         0.01557    0.00090    0.00618   -0.00325
B9    3    1.242472    0.081471    1.291922    11.00000    0.02443    0.01585 =
         0.01030    0.00102    0.00716    0.00047
B10   3    1.041881    0.070226    1.356732    11.00000    0.02314    0.01797 =
         0.01243    0.00566    0.00714   -0.00093
AFIX 153
H10   2    0.937028    0.036883    1.292905    11.00000   -1.20000
AFIX   0
B11   3    0.977172    0.137537    1.424677    11.00000    0.02589    0.02563 =
         0.02474    0.00147    0.01801    0.00466
AFIX 153
H11   2    0.828917    0.148788    1.407897    11.00000   -1.20000
AFIX   0
B12   3    1.061304    0.133086    1.237542    11.00000    0.01748    0.01852 =
         0.01057   -0.00008    0.00747    0.00423

HKLF 4

REM  siv40 in P2(1)/n
REM R1 =  0.0343 for    2331 Fo > 4sig(Fo)  and  0.0390 for all    2611 data
REM    136 parameters refined using      0 restraints

END

WGHT      0.0229     12.3134

REM No hydrogen bonds found for HTAB generation

REM Highest difference peak  2.062,  deepest hole -1.052,  1-sigma level  0.187
Q1    1   1.4052  0.0528  1.1211  11.00000  0.05    2.06
Q2    1   1.3055  0.2153  1.0974  11.00000  0.05    1.41
Q3    1   1.6451  0.1064  1.5518  11.00000  0.05    1.34
Q4    1   1.3473  0.2274  1.1201  11.00000  0.05    1.31
Q5    1   0.9111  0.1113  0.9679  11.00000  0.05    1.20
Q6    1   1.5231  0.0742  1.5160  11.00000  0.05    0.86
Q7    1   1.1845  0.2303  1.3998  11.00000  0.05    0.85
Q8    1   0.9298  0.1838  0.9711  11.00000  0.05    0.79
Q9    1   1.1282  0.0486  1.3797  11.00000  0.05    0.74
Q10   1   1.4465 -0.0012  1.1533  11.00000  0.05    0.69
;
_shelx_res_checksum   59278

_shelx_hkl_file
;
  -1   0   0    0.13    0.08
   1   0   0    0.21    0.08
  -1   0   0    0.30    0.09
  -3   0   0    0.10    0.26
  -3   0   0    0.86    0.30
   3   0   0    0.16    0.27
   3   0   0    0.02    0.25
  -4   0   0  168.32    6.60
   4   0   0  157.79    6.38
  -4   0   0  149.16    6.36
   4   0   0  155.36    6.38
  -5   0   0    0.93    0.58
   5   0   0    0.38    0.46
   6   0   0   52.22    2.52
  -6   0   0   53.43    2.71
   7   0   0    1.37    0.85
  -7   0   0    0.43    1.05
  -8   0   0    7.03    2.77
   0  -1   0   -0.01    0.04
   0  -1   0    0.01    0.04
  -1  -1   0    0.48    0.09
  -1  -1   0    0.43    0.11
   1   1   0    0.50    0.09
   1   1   0    0.50    0.11
  -1   1   0    0.75    0.11
   2  -1   0  777.95   31.35
   2  -1   0  821.63   31.34
  -2  -1   0  795.96   31.34
  -2   1   0  789.41   31.33
   2   1   0  808.57   31.35
  -3  -1   0   40.38    1.80
   3  -1   0   38.27    1.85
  -3  -1   0   41.48    1.80
   3  -1   0   42.61    1.79
  -3   1   0   39.69    1.78
  -3   1   0   43.34    1.86
   3   1   0   41.99    1.81
  -4  -1   0  103.96    4.08
   4  -1   0  100.14    4.02
  -4  -1   0   90.75    4.01
   4   1   0   99.41    4.15
  -4   1   0   91.45    3.99
   4   1   0   91.02    4.00
  -4   1   0  100.86    4.10
   5  -1   0  160.66    6.69
  -5  -1   0  161.67    6.75
   5   1   0  162.44    6.72
  -5   1   0  169.52    6.82
  -6  -1   0    6.63    1.00
   6  -1   0    5.54    0.82
   6   1   0    6.61    0.87
  -6   1   0    5.12    0.97
   7  -1   0   94.48    4.24
  -7  -1   0   94.29    4.50
  -7   1   0   96.30    4.54
   7   1   0   94.57    4.30
  -8  -1   0   15.41    2.47
  -8   1   0   16.45    2.06
  -1  -2   0  133.18    5.23
   1  -2   0  133.52    5.28
  -1  -2   0  131.44    5.27
   1   2   0  131.19    5.27
  -1   2   0  133.61    5.24
   2  -2   0  478.69   18.25
  -2  -2   0  454.05   18.24
  -2  -2   0  469.82   18.28
   2  -2   0  454.07   18.30
  -2   2   0  466.45   18.32
   2   2   0  478.20   18.30
   2   2   0  458.49   18.24
  -2   2   0  454.46   18.24
   3  -2   0   13.64    0.76
  -3  -2   0   14.22    0.76
   3  -2   0   14.87    0.86
  -3   2   0   13.70    0.85
   3   2   0   13.59    0.79
  -3   2   0   13.29    0.75
  -4  -2   0  129.78    5.30
  -4  -2   0  123.88    5.31
   4  -2   0  132.89    5.28
  -4   2   0  134.99    5.40
   4   2   0  131.12    5.33
  -4   2   0  123.76    5.26
   5  -2   0  130.69    5.21
  -5  -2   0  123.35    5.25
   5   2   0  122.03    5.25
  -5   2   0  125.09    5.35
   6  -2   0   50.95    2.44
  -6  -2   0   49.63    2.59
   6   2   0   52.96    2.52
  -6   2   0   48.75    2.70
  -7  -2   0   57.07    3.00
   7  -2   0   50.45    2.68
   7   2   0   54.66    2.83
  -7   2   0   56.53    3.13
  -8   2   0    1.85    1.53
   8   2   0    2.31    2.11
   0  -3   0    2.18    0.23
   0  -3   0    0.86    0.20
  -1  -3   0   31.78    1.27
  -1  -3   0   29.87    1.34
   1  -3   0   32.39    1.37
   1  -3   0   30.21    1.29
  -1   3   0   30.35    1.29
   1   3   0   31.95    1.35
  -1   3   0   31.79    1.37
  -2  -3   0   15.33    0.80
  -2  -3   0   15.39    0.71
   2  -3   0   14.72    0.81
   2  -3   0   14.85    0.72
  -2  -3   0   15.14    0.71
   2   3   0   15.35    0.79
  -2   3   0   15.56    0.73
  -2   3   0   15.29    0.83
   3  -3   0  450.83   17.11
  -3  -3   0  432.32   17.10
   3  -3   0  405.83   17.16
  -3  -3   0  420.65   17.14
  -3  -3   0  449.65   17.10
  -3   3   0  443.27   17.22
   3   3   0  434.30   17.17
  -3   3   0  431.81   17.10
  -4  -3   0  175.31    6.85
   4  -3   0  170.38    6.85
  -4  -3   0  172.21    6.87
  -4   3   0  161.49    6.83
  -4   3   0  171.74    6.99
   4   3   0  167.36    6.91
   5  -3   0   29.29    1.50
  -5  -3   0   26.60    1.54
   5   3   0   27.65    1.56
  -5   3   0   30.10    1.74
   6  -3   0    1.63    0.69
  -6  -3   0    1.68    0.76
  -6   3   0    1.56    0.88
   7  -3   0   25.48    1.73
  -7  -3   0   26.15    2.05
   7   3   0   28.76    1.98
  -7   3   0   30.22    2.33
   8   3   0    0.13    1.38
  -8   3   0    0.04    1.52
   0  -4   0   84.22    3.58
   0  -4   0   90.51    3.56
   0   4   0   96.55    3.57
   0   4   0   78.09    3.60
   1  -4   0  129.42    5.28
  -1  -4   0  131.38    5.27
   1  -4   0  130.90    5.20
  -1  -4   0  129.64    5.18
   1   4   0  133.69    5.27
   1   4   0  132.63    5.19
  -1   4   0  126.57    5.20
  -1   4   0  131.55    5.29
  -2  -4   0   93.34    3.86
  -2  -4   0   94.01    3.96
  -2  -4   0   94.65    3.86
   2  -4   0   97.52    3.89
   2  -4   0   96.06    3.98
  -2   4   0   99.23    3.89
   2   4   0   96.79    3.96
  -2   4   0  101.00    4.02
  -3  -4   0  160.57    6.36
  -3  -4   0  156.53    6.45
   3  -4   0  149.48    6.46
   3  -4   0  165.13    6.38
  -3  -4   0  163.62    6.36
  -3   4   0  159.09    6.37
   3   4   0  158.41    6.46
  -4  -4   0  173.01    6.80
   4  -4   0  165.17    6.80
  -4  -4   0  170.53    6.81
  -4   4   0  161.91    6.79
  -4   4   0  171.54    6.98
   4   4   0  169.69    6.90
   5  -4   0   69.20    3.04
  -5  -4   0   70.70    3.08
   5   4   0   66.39    3.14
  -5   4   0   73.92    3.32
   6  -4   0    0.97    0.66
  -6  -4   0    1.48    0.73
  -6   4   0    1.32    0.92
   6   4   0    1.38    0.75
  -7  -4   0    3.85    1.10
   7  -4   0    3.82    0.90
  -7   4   0    3.09    1.27
   7   4   0    5.67    1.10
  -8   4   0   59.95    3.77
   8   4   0   52.97    3.23
   0  -5   0    1.34    0.30
   0  -5   0    0.36    0.27
   0   5   0    0.35    0.27
   0   5   0    1.13    0.28
   1  -5   0  395.89   15.41
  -1  -5   0  383.60   15.37
   1  -5   0  380.78   15.48
  -1  -5   0  393.01   15.48
  -1   5   0  390.69   15.41
   1   5   0  402.12   15.49
   1   5   0  390.87   15.37
  -2  -5   0  117.72    4.61
   2  -5   0  111.56    4.75
   2  -5   0  113.13    4.64
   2   5   0  115.60    4.61
   2   5   0  113.12    4.73
  -2   5   0  120.78    4.79
  -2   5   0  116.43    4.65
   3  -5   0    5.93    0.51
  -3  -5   0    5.66    0.46
  -3  -5   0    6.30    0.64
  -3  -5   0    5.64    0.48
   3   5   0    5.90    0.71
  -3   5   0    6.00    0.53
  -3   5   0    7.41    0.74
  -4  -5   0  131.46    5.28
   4  -5   0  127.77    5.30
  -4  -5   0  132.73    5.30
  -4   5   0  134.52    5.52
   4   5   0  130.57    5.42
  -4   5   0  123.41    5.30
  -5  -5   0    0.20    0.49
   5  -5   0   -0.08    0.50
  -5   5   0    1.33    0.75
   5   5   0    0.12    0.56
   6  -5   0  167.55    6.88
  -6  -5   0  162.54    6.93
   6   5   0  166.21    7.03
  -6   5   0  171.23    7.23
   7  -5   0   88.09    3.98
  -7  -5   0   88.28    4.19
  -7   5   0   89.89    5.44
   7   5   0   87.62    4.14
  -8   5   0    1.35    1.58
   8   5   0    0.56    1.21
   0  -6   0  830.40   31.90
   0  -6   0  789.92   31.85
   0   6   0  793.23   31.89
   0   6   0  825.15   31.86
   1  -6   0  813.72   31.57
   1  -6   0  798.61   31.58
  -1  -6   0  797.09   31.53
   1  -6   0  790.51   31.65
  -1  -6   0  781.34   31.65
   1   6   0  808.17   31.53
   1   6   0  806.87   31.66
  -1   6   0  832.67   31.67
   2  -6   0    5.78    0.45
  -2  -6   0    6.42    0.43
   2  -6   0    5.92    0.62
  -2  -6   0    5.13    0.56
   2   6   0    5.45    0.39
   2   6   0    6.49    0.59
  -2   6   0    6.10    0.49
  -2   6   0    8.04    0.72
  -3  -6   0  111.75    4.56
   3  -6   0  117.75    4.60
  -3  -6   0  112.15    4.56
  -3  -6   0  104.24    5.08
   3   6   0  109.78    4.71
  -3   6   0  116.45    4.80
  -3   6   0  116.89    4.61
   4  -6   0   90.29    3.65
  -4  -6   0   83.27    3.61
  -4  -6   0   85.76    3.62
  -4   6   0   87.78    3.89
  -4   6   0   87.68    3.67
   4   6   0   89.33    3.80
  -5  -6   0   11.69    0.92
   5  -6   0   10.45    0.89
  -5   6   0   10.98    1.18
   5   6   0   11.28    1.08
  -6  -6   0    6.02    0.89
   6  -6   0    5.11    0.80
   6   6   0    4.30    0.91
  -6   6   0    5.74    1.20
  -7   6   0    2.15    1.31
   7   6   0    2.26    1.01
  -8   6   0    0.07    1.54
   8   6   0    0.89    1.30
   0  -7   0    0.93    0.41
   0  -7   0    2.00    0.43
   0   7   0    0.89    0.36
   0   7   0    1.14    0.38
   1  -7   0  445.82   17.48
   1  -7   0  443.80   17.46
   1  -7   0  416.94   17.53
  -1  -7   0  446.28   17.42
  -1   7   0  450.19   17.56
   1   7   0  445.45   17.56
   1   7   0  444.60   17.41
   2  -7   0  396.71   15.57
  -2  -7   0  384.45   15.68
   2  -7   0  383.63   15.70
  -2  -7   0  401.90   15.53
  -2   7   0  378.79   15.60
   2   7   0  400.87   15.69
   2   7   0  402.95   15.51
  -2   7   0  402.56   15.74
  -3  -7   0    7.04    0.51
  -3  -7   0    6.95    0.55
   3  -7   0    6.26    0.59
  -3   7   0    9.03    0.91
   3   7   0    7.70    0.74
  -4  -7   0    1.10    0.50
  -4  -7   0    1.24    0.38
   4  -7   0    0.93    0.44
  -4   7   0    1.56    0.68
  -4   7   0    1.16    0.54
   4   7   0    1.05    0.51
   5  -7   0  222.18    8.88
  -5   7   0  220.36    9.19
   5   7   0  217.20    9.06
   6  -7   0   43.07    2.19
  -6  -7   0   43.46    2.24
  -6   7   0   47.01    2.70
   6   7   0   41.54    2.38
   7   7   0    0.93    1.02
  -7   7   0    1.16    1.29
  -8   7   0   20.53    2.37
   8   7   0   23.65    2.10
   0  -8   0   74.29    3.22
   0  -8   0   74.13    3.27
   0   8   0   79.43    3.23
   0   8   0   71.58    3.24
   1  -8   0    3.25    0.43
  -1  -8   0    2.48    0.42
   1  -8   0    1.84    0.48
   1  -8   0    2.04    0.45
  -1  -8   0    2.70    0.56
   1   8   0    2.93    0.52
  -1   8   0    5.04    0.65
   1   8   0    2.55    0.36
   2  -8   0   71.91    2.96
  -2  -8   0   69.52    3.12
  -2  -8   0   68.83    2.91
   2  -8   0   67.24    3.24
  -2   8   0   76.02    3.18
   2   8   0   69.73    2.89
  -2   8   0   67.89    2.97
   2   8   0   73.84    3.12
   3  -8   0  578.27   22.81
  -3  -8   0  594.70   22.77
  -3   8   0  559.71   22.82
  -3   8   0  586.63   23.04
   3   8   0  585.31   22.75
   3   8   0  566.23   22.97
   4  -8   0    1.04    0.49
  -4  -8   0    0.52    0.53
  -4  -8   0    0.66    0.37
  -4   8   0    1.67    0.73
   4   8   0    1.63    0.60
  -4   8   0    0.66    0.56
   5  -8   0    1.84    0.57
  -5   8   0    2.97    0.94
   5   8   0    2.37    0.76
   6  -8   0   33.89    1.85
  -6  -8   0   32.84    1.89
   6   8   0   33.66    2.12
  -6   8   0   34.58    2.43
  -7   8   0   83.11    4.38
  -8   8   0   15.36    2.21
   8   8   0   16.34    1.83
   0  -9   0    0.97    0.49
   0  -9   0    0.30    0.50
   0   9   0    0.06    0.41
   0   9   0    0.22    0.38
  -1  -9   0   96.95    3.99
  -1  -9   0   96.21    4.14
   1  -9   0   86.01    4.09
   1  -9   0   94.67    4.25
   1  -9   0   98.87    4.02
   1   9   0   99.15    3.96
  -1   9   0   97.60    4.14
   1   9   0   97.41    4.14
  -2  -9   0  107.33    4.39
   2  -9   0  105.07    4.54
   2  -9   0  107.62    4.44
   2   9   0  111.41    4.37
  -2   9   0  106.14    4.64
   2   9   0  109.43    4.60
  -3  -9   0   20.26    1.03
   3  -9   0   15.25    1.01
   3   9   0   20.00    0.95
  -3   9   0   15.18    1.08
  -3   9   0   19.70    1.35
   4  -9   0  370.13   14.49
  -4  -9   0  367.54   14.47
  -4  -9   0  369.83   14.42
   4   9   0  357.52   14.67
  -4   9   0  365.83   14.77
  -4   9   0  352.65   14.49
  -5  -9   0   37.69    1.91
   5  -9   0   37.19    1.87
   5   9   0   38.78    2.14
  -5   9   0   34.76    2.31
  -6  -9   0    9.22    1.15
   6  -9   0    8.97    0.99
  -6   9   0   10.52    1.45
   6   9   0    9.17    1.24
   7   9   0    2.04    1.08
  -7   9   0    1.56    1.33
  -8   9   0    1.03    1.67
   8   9   0    1.11    1.25
   0 -10   0   15.91    1.19
   0 -10   0   15.73    1.15
   0  10   0   16.91    1.13
   0  10   0   15.39    1.10
   1 -10   0   93.14    3.88
   1 -10   0   82.15    3.89
  -1 -10   0   82.48    3.99
  -1 -10   0   90.89    3.78
   1 -10   0   92.05    3.79
   1  10   0   92.90    3.94
   1  10   0   89.52    3.73
   2 -10   0   89.91    3.92
  -2 -10   0   89.55    3.85
   2 -10   0   94.00    3.90
  -2  10   0   95.13    4.14
   2  10   0   94.89    3.82
   2  10   0   96.63    4.09
  -3 -10   0   80.19    3.38
   3 -10   0   85.43    3.44
   3  10   0   78.02    3.33
   3  10   0   79.48    3.62
  -3  10   0   78.84    3.46
  -3  10   0   84.97    3.72
   4 -10   0   47.13    2.22
  -4 -10   0   50.00    2.21
  -4 -10   0   48.80    2.16
  -4  10   0   52.18    2.65
   4  10   0   47.74    2.45
  -5 -10   0    0.66    0.55
   5 -10   0    0.96    0.62
   5  10   0    0.02    0.69
  -5  10   0    0.70    0.88
   6 -10   0   40.43    2.17
  -6  10   0   46.86    2.93
   6  10   0   40.99    2.45
   7  10   0    4.48    1.20
  -7  10   0    4.10    1.51
   8  10   0   58.86    3.50
  -8  10   0   60.12    4.03
   0 -11   0    0.09    0.57
   0 -11   0   -0.06    0.61
   0  11   0    0.06    0.48
   0  11   0   -0.07    0.48
   1 -11   0  130.38    5.57
  -1 -11   0  131.22    5.55
   1  11   0  132.23    5.63
   1  11   0  129.13    5.41
  -1  11   0  137.12    5.63
  -2 -11   0   43.29    2.02
   2 -11   0   43.38    2.12
  -2  11   0   45.86    2.31
   2  11   0   42.30    1.93
   2  11   0   44.71    2.23
   3 -11   0    5.01    0.61
  -3 -11   0    4.80    0.61
   3  11   0    5.58    0.52
   3  11   0    4.14    0.74
  -3  11   0    6.75    1.00
   4 -11   0    0.59    0.49
  -4 -11   0    0.92    0.42
   4  11   0    1.20    0.69
  -4  11   0    1.50    0.82
   5 -11   0   81.17    3.45
  -5 -11   0   77.75    3.41
  -5  11   0   76.69    3.90
   5  11   0   77.30    3.72
   6 -11   0  210.13    8.35
   6  11   0  203.43    8.65
  -6  11   0  194.04    8.80
   7  11   0    0.94    1.10
  -7  11   0    1.04    1.43
   8  11   0    7.42    1.63
  -8  11   0    7.25    2.05
   0 -12   0   96.41    4.47
   0  12   0  105.30    4.53
   0  12   0  109.26    4.61
   1 -12   0  525.98   20.84
  -1 -12   0  535.96   20.84
  -1  12   0  518.70   20.95
   1  12   0  526.04   20.78
   1  12   0  514.65   20.99
   2 -12   0    0.76    0.46
  -2 -12   0    1.22    0.61
   2  12   0    0.73    0.40
   2  12   0    1.72    0.64
  -2  12   0    1.36    0.66
   3 -12   0  127.36    5.25
  -3 -12   0  125.93    5.20
   3  12   0  125.88    5.14
   3  12   0  124.97    5.49
  -3  12   0  128.63    5.57
   4 -12   0    6.03    0.76
   4  12   0    6.18    0.97
  -4  12   0    8.83    1.24
  -5 -12   0   -0.31    0.59
   5 -12   0    0.76    0.64
  -5  12   0    0.51    1.00
   5  12   0    0.43    0.78
   6 -12   0    3.45    0.89
  -6  12   0    3.92    1.32
   6  12   0    2.96    1.06
   7  12   0    6.53    1.36
  -7  12   0    7.96    1.77
  -8  12   0   27.07    2.82
   8  12   0   23.53    2.32
   0  13   0    0.51    0.58
   0  13   0    0.60    0.59
  -1 -13   0  527.24   21.21
   1 -13   0  531.77   21.22
   1  13   0  524.54   21.16
  -1  13   0  537.14   21.33
   1  13   0  546.27   21.40
  -2 -13   0    8.37    0.90
   2 -13   0    9.04    0.85
  -2  13   0    8.08    1.08
   2  13   0    7.13    0.69
   2  13   0    9.17    1.09
   3 -13   0   93.16    4.07
  -3 -13   0   93.52    4.05
   3  13   0   99.84    4.36
   3  13   0   94.74    3.96
  -3  13   0   97.34    4.42
   4 -13   0   71.47    3.03
   4  13   0   67.11    2.88
   4  13   0   63.42    3.30
  -4  13   0   65.54    3.47
   5 -13   0   32.16    1.86
   5  13   0   33.24    2.17
  -5  13   0   41.70    3.80
   6 -13   0   47.87    2.55
   6  13   0   43.98    2.75
  -6  13   0   44.33    3.09
   7  13   0   16.90    1.90
  -7  13   0   16.17    2.13
   0  14   0    2.18    0.73
   0  14   0    2.67    0.72
   2 -14   0   65.06    2.97
  -2 -14   0   62.35    3.01
   2  14   0   66.84    3.22
  -2  14   0   65.58    3.27
   2  14   0   66.33    2.86
   3 -14   0  341.11   13.45
  -3 -14   0  325.54   13.41
  -3  14   0  339.05   13.76
   3  14   0  334.65   13.71
   3  14   0  334.82   13.31
   4 -14   0   63.18    2.87
   4  14   0   61.54    3.21
  -4  14   0   64.34    3.38
   4  14   0   61.73    2.72
   5 -14   0   11.17    1.13
  -5  14   0   13.91    1.72
   5  14   0   10.60    1.41
  -6  14   0   11.89    1.77
   6  14   0   10.37    1.51
   7  14   0   15.81    1.95
  -7  14   0   16.49    2.19
   0  15   0    1.21    0.71
   0  15   0    0.49    0.67
   1 -15   0   13.58    1.21
  -1  15   0   17.16    1.42
   1  15   0   16.47    1.43
   1  15   0   14.43    1.21
  -2 -15   0   91.64    4.37
   2 -15   0   95.15    4.19
  -2  15   0   94.55    4.45
   2  15   0   97.42    4.07
   2  15   0   98.98    4.46
   3 -15   0   76.51    3.40
  -3  15   0   73.38    3.76
   3  15   0   76.38    3.70
   4 -15   0   29.62    1.77
  -4  15   0   27.09    2.29
   4  15   0   39.55    2.26
   5 -15   0  122.80    5.08
  -5  15   0  114.71    5.59
   5  15   0  114.67    5.45
   6  15   0   22.93    2.14
  -6  15   0   23.48    2.39
   7  15   0    3.44    1.47
  -7  15   0    5.38    1.87
   0  16   0  179.29    7.73
   0  16   0  185.46    7.65
   1 -16   0    4.24    0.82
  -1  16   0    3.45    0.95
   1  16   0    4.47    0.98
   1  16   0    5.73    0.86
   2 -16   0  146.18    6.07
   2  16   0  135.70    6.29
  -2  16   0  152.06    6.33
   2  16   0  138.97    5.93
   3 -16   0    0.27    0.64
   3  16   0    0.92    0.91
   3  16   0    1.00    0.58
  -3  16   0    0.90    1.03
   4 -16   0   20.52    1.48
   4  16   0   19.28    1.23
  -4  16   0   18.69    2.35
   4  16   0   20.30    1.83
   5 -16   0   81.84    3.65
   5  16   0   73.85    4.04
  -5  16   0   83.33    4.30
  -6  16   0   13.79    2.01
   6  16   0    9.17    1.59
   7  16   0    4.05    1.61
  -7  16   0    1.80    1.73
   0  17   0    1.46    0.83
   0  17   0    1.28    0.82
   1 -17   0    1.32    0.73
   1  17   0    0.98    0.85
  -1  17   0    1.72    0.92
   1  17   0    1.28    0.71
   2 -17   0    3.30    0.81
   2  17   0    1.57    0.91
   2  17   0    1.63    0.68
  -2  17   0    2.90    1.05
   3 -17   0   -0.04    0.70
   3  17   0    0.71    0.98
  -3  17   0    0.23    1.04
   3  17   0   -0.16    0.59
   4 -17   0   15.05    1.37
  -4  17   0   18.94    1.97
   4  17   0   15.23    1.15
   4  17   0   13.02    1.58
   5 -17   0   77.01    3.62
  -5  17   0   75.14    4.23
   5  17   0   80.52    4.10
   6  17   0   15.69    1.89
  -6  17   0   15.25    2.07
   7  17   0   71.40    4.27
  -7  17   0   73.82    4.60
   0  18   0  484.47   18.93
   0  18   0  455.61   19.00
   1 -18   0   16.65    1.50
   1  18   0   22.48    1.80
   1  18   0   18.40    1.47
  -1  18   0   14.19    1.56
   2 -18   0    2.46    0.85
   2  18   0    2.27    0.75
   2  18   0    1.18    0.94
  -2  18   0    1.91    1.07
   3 -18   0   14.46    1.29
  -3  18   0   13.72    1.69
   3  18   0   13.85    1.12
   3  18   0   12.60    1.58
   4 -18   0    0.73    0.81
   4  18   0    0.90    1.16
  -4  18   0    1.01    1.27
   5 -18   0    9.26    1.20
  -5  18   0    7.66    1.69
   5  18   0   10.12    1.60
   6  18   0    9.09    1.71
  -6  18   0    7.51    1.93
   7  18   0   14.73    2.25
  -7  18   0   16.27    2.49
   1 -19   0   17.05    1.60
   1  19   0   21.01    1.85
   1  19   0   17.80    1.57
  -1  19   0   20.23    1.78
   2 -19   0  191.02    8.11
   2  19   0  202.37    8.41
   2  19   0  190.36    7.98
  -2  19   0  188.72    8.32
   3 -19   0   53.03    2.79
  -3  19   0   55.83    3.65
   3  19   0   55.78    2.63
   3  19   0   55.24    3.19
   4 -19   0   31.00    2.03
   4  19   0   35.83    2.59
  -4  19   0   29.43    2.66
   5 -19   0    8.86    1.26
   5  19   0   10.15    1.76
  -5  19   0    8.89    1.77
   6  19   0    1.65    1.53
  -6  19   0    0.13    1.72
   0  20   0   72.73    3.71
   0  20   0   74.45    3.62
   1 -20   0   10.29    1.33
  -1  20   0   11.88    1.48
   1  20   0   14.02    1.35
   1  20   0   14.29    1.59
   2 -20   0  105.90    4.72
   2  20   0  102.08    4.55
  -2  20   0  101.06    4.92
   3 -20   0    2.02    0.94
   3  20   0    3.34    1.22
  -3  20   0    3.96    1.38
   3  20   0    3.22    0.88
   4 -20   0  103.12    4.81
  -4  20   0  108.93    5.29
   4  20   0  110.42    5.34
   5 -20   0    3.64    1.16
  -5  20   0    3.95    1.66
   5  20   0    3.08    1.54
   6  20   0   24.90    2.53
  -6  20   0   24.06    2.65
   0  21   0    1.52    0.96
   0  21   0    0.86    1.01
   1 -21   0    3.17    1.02
   1  21   0    6.43    1.06
  -1  21   0    3.19    1.17
   1  21   0    4.77    1.39
   2 -21   0   71.65    3.62
   2  21   0   76.81    3.92
   2  21   0   72.26    3.48
   3 -21   0   85.54    4.11
   3  21   0   84.94    3.91
  -3  21   0   88.21    4.55
   3  21   0   90.13    4.51
   4 -21   0   75.70    3.75
   4  21   0   78.54    4.29
  -4  21   0   78.57    4.35
  -5  21   0   12.37    1.94
   5  21   0   12.68    2.08
   6  21   0   13.25    2.16
  -6  21   0   10.67    2.18
   0  22   0  129.36    5.78
   1 -22   0   48.11    2.68
   1  22   0   46.98    2.63
  -1  22   0   43.92    2.86
   1  22   0   41.79    2.83
   2 -22   0    9.89    1.37
   2  22   0    9.95    1.61
   2  22   0    8.87    1.23
  -2  22   0   11.72    1.64
   3 -22   0    8.20    1.28
   3  22   0   10.13    1.68
  -3  22   0    9.57    1.62
   4 -22   0    1.57    1.08
   4  22   0    1.59    1.43
  -4  22   0    1.58    1.53
  -5  22   0   53.27    3.58
   5  22   0   43.44    3.45
   1 -23   0   12.56    1.53
   1  23   0   10.14    1.55
  -1  23   0    9.97    1.75
   1  23   0    7.94    1.28
   2 -23   0   11.74    1.73
   2  23   0   16.45    1.49
  -2  23   0   12.95    1.75
   2  23   0   16.47    1.90
   3 -23   0    4.58    1.42
   3  23   0    6.23    1.57
  -3  23   0    4.94    1.50
   4 -23   0   11.75    1.55
  -4  23   0   13.16    2.03
   4  23   0   11.85    1.95
  -5  23   0   13.31    2.19
   5  23   0   16.07    2.24
   0 -24   0   90.26    4.27
   0  24   0   78.93    4.17
   1 -24   0   48.28    2.85
  -1  24   0   43.06    2.89
   1  24   0   49.17    3.05
   1  24   0   42.06    2.68
   2 -24   0    3.74    1.21
   2  24   0    2.58    1.32
  -2  24   0    3.21    1.38
   2  24   0    2.66    1.10
   3 -24   0   -0.20    1.08
  -3  24   0   -0.44    1.35
   3  24   0    0.08    1.34
   4 -24   0    5.61    1.36
  -4  24   0    4.44    1.69
   4  24   0    6.08    1.72
   5  24   0   12.51    2.14
  -5  24   0   11.64    2.20
   0 -25   0    1.35    1.15
   0  25   0    1.63    1.21
   1 -25   0   23.05    2.07
   1  25   0   22.73    2.19
  -1  25   0   21.94    2.07
   1  25   0   22.66    1.95
   2 -25   0  115.90    5.24
   2  25   0  100.55    5.36
   2  25   0  108.36    5.00
  -2  25   0  111.46    5.38
   3 -25   0    2.72    1.29
   3  25   0    2.86    1.54
  -3  25   0    5.89    1.68
   4 -25   0    3.83    1.43
   4  25   0    2.82    1.62
  -4  25   0    4.64    1.73
   0 -26   0   63.82    3.57
   0  26   0   62.10    3.53
   1 -26   0    1.42    1.29
   1  26   0    1.84    1.35
   1  26   0    1.44    1.41
  -1  26   0    0.96    1.30
   2 -26   0    8.57    1.59
   2  26   0    9.60    1.72
  -2  26   0    7.94    1.69
   3 -26   0   63.36    3.55
   3  26   0   58.95    3.87
  -3  26   0   62.75    3.91
   4 -26   0   23.66    2.23
  -4  26   0   24.52    2.63
   4  26   0   21.05    2.50
   0 -27   0    0.48    1.23
   0  27   0    3.53    1.40
   1 -27   0   26.12    2.36
   1  27   0   21.16    2.20
   1  27   0   26.46    2.20
  -1  27   0   25.69    2.30
   2 -27   0    1.85    1.42
   2  27   0    0.84    1.43
  -2  27   0    1.15    1.44
   3 -27   0    5.54    1.55
   3  27   0    3.87    1.61
  -3  27   0    3.86    1.73
   0 -28   0    3.14    1.48
   0  28   0    2.99    1.42
  -1 -28   0   55.49    3.54
   1 -28   0   62.57    3.66
  -1  28   0   59.49    3.56
   1  28   0   58.27    3.45
   2 -28   0    6.82    1.66
  -2  28   0    8.17    1.84
   2  28   0    7.15    1.78
   0 -29   0   -0.09    1.44
   0  29   0   -0.08    1.38
   1 -29   0    5.94    1.70
  -1 -29   0    7.35    1.64
  -1  29   0    4.88    1.69
   1  29   0    7.66    1.70
   8   0  -1    0.09    0.96
  -7   0   1  149.72    6.49
   7   0  -1  139.80    6.15
   6   0  -1    0.50    0.63
  -6   0   1    1.06    0.96
   5   0  -1   43.95    2.09
  -5   0   1   41.59    2.24
   4   0  -1    0.50    0.39
  -4   0   1    0.71    0.53
   4   0  -1    0.43    0.37
  -3   0   1   60.84    2.50
  -3   0   1   49.81    2.41
   3   0  -1   60.49    2.44
   3   0  -1   56.56    2.37
  -2   0   1    0.22    0.19
   2   0  -1    0.07    0.18
   2   0  -1    0.42    0.21
  -2   0   1    0.37    0.30
  -1   0   1  291.44   11.82
   1   0  -1  303.57   11.81
  -1   0   1  305.82   11.80
   0   0   1    0.31    0.08
   0   0  -1    0.31    0.11
   0   0  -1    0.44    0.09
  -1   0  -1  539.62   21.01
  -1   0  -1  520.87   21.01
  -1   0  -1  543.15   20.95
  -2   0  -1    0.11    0.17
   2   0   1    0.03    0.19
  -2   0  -1    0.29    0.21
   2   0   1    0.08    0.23
   3   0   1  106.05    4.39
   3   0   1  107.62    4.32
  -3   0  -1  105.45    4.30
  -4   0  -1    0.02    0.42
   4   0   1    0.47    0.39
  -4   0  -1    0.09    0.40
   5   0   1  321.63   12.93
  -5   0  -1  325.06   13.05
  -6   0  -1   -0.36    0.74
   6   0   1   -0.11    0.74
  -7   0  -1  108.67    5.06
  -8   0  -1   -0.30    1.43
   8  -1  -1    2.61    1.02
  -8   1   1    4.65    1.82
  -7  -1   1    0.54    1.24
   7  -1  -1    1.77    0.83
  -7   1   1    2.75    1.30
   7   1  -1    0.39    0.74
   6  -1  -1   47.42    2.37
  -6  -1   1   49.95    2.61
  -6   1   1   47.80    2.67
   6   1  -1   45.02    2.34
   5  -1  -1   33.59    1.66
   5   1  -1   32.88    1.69
  -5   1   1   32.17    1.89
   5   1  -1   28.49    1.58
  -4  -1   1    2.38    0.55
   4  -1  -1    0.92    0.42
   4  -1  -1    1.32    0.42
  -4   1   1    1.79    0.59
   4   1  -1    1.42    0.42
   4   1  -1    1.31    0.38
   3  -1  -1   24.60    1.13
  -3  -1   1   21.24    1.13
  -3  -1   1   23.15    1.16
   3   1  -1   23.19    1.13
  -3   1   1   25.34    1.27
  -3   1   1   22.15    1.11
   3   1  -1   21.34    1.04
   2  -1  -1  209.13    7.93
  -2  -1   1  184.54    7.90
  -2  -1   1  202.10    7.93
   2   1  -1  203.16    7.86
   2   1  -1  204.44    7.93
  -2   1   1  199.25    7.92
  -2   1   1  190.80    7.98
  -1  -1   1   23.31    0.97
  -1  -1   1   24.33    1.02
   1  -1  -1   23.78    1.04
  -1   1   1   23.03    1.02
   1   1  -1   24.24    0.97
  -1   1   1   23.28    1.02
   0  -1  -1  413.07   16.21
   0  -1   1  409.86   16.19
   0   1  -1  416.57   16.19
  -1  -1  -1  453.50   17.20
   1  -1   1  423.18   17.21
  -1  -1  -1  454.63   17.21
   1   1   1  449.50   17.21
   1   1   1  410.51   17.22
  -1   1  -1  432.76   17.22
   2  -1   1    6.21    0.38
  -2  -1  -1    6.50    0.51
  -2  -1  -1    5.81    0.47
  -2  -1  -1    6.52    0.43
  -2   1  -1    5.95    0.47
   2   1   1    6.70    0.47
  -2   1  -1    5.79    0.36
   3  -1   1    5.10    0.57
  -3  -1  -1    3.00    0.46
   3  -1   1    3.47    0.38
  -3  -1  -1    2.78    0.39
   3   1   1    3.65    0.44
  -3   1  -1    3.14    0.36
  -3   1  -1    3.51    0.48
  -4  -1  -1   56.13    2.56
  -4  -1  -1   61.18    2.65
   4  -1   1   61.37    2.54
  -4   1  -1   60.59    2.68
   4   1   1   60.36    2.59
  -4   1  -1   54.73    2.58
  -5  -1  -1  210.41    8.48
  -5   1  -1  206.79    8.50
   5   1   1  202.07    8.39
   6  -1   1   24.62    1.56
  -6  -1  -1   23.08    1.71
  -6   1  -1   23.94    1.74
   6   1   1   23.16    1.61
  -7  -1  -1   87.05    4.20
  -8  -1  -1    5.59    1.56
  -8   1  -1    5.07    1.66
   8  -2  -1   62.54    3.17
   8   2  -1   57.93    3.25
  -8   2   1   66.84    3.94
  -7  -2   1    2.68    1.27
   7  -2  -1    4.00    0.94
   7   2  -1    3.44    0.90
  -7   2   1    3.52    1.33
  -6  -2   1   90.38    4.08
   6  -2  -1   88.10    3.89
   6   2  -1   88.09    3.93
  -6   2   1   86.97    4.19
   5  -2  -1  141.32    5.90
  -5  -2   1  147.80    5.96
   5   2  -1  141.85    5.93
   5   2  -1  134.56    5.78
  -5   2   1  148.28    6.11
   4  -2  -1   59.32    2.66
   4  -2  -1   59.75    2.64
  -4  -2   1   65.85    2.68
  -4   2   1   52.71    2.71
   4   2  -1   65.76    2.69
   4   2  -1   57.43    2.54
  -4   2   1   64.75    2.85
  -3  -2   1    8.62    0.61
   3  -2  -1    8.06    0.66
  -3  -2   1    7.50    0.63
   3  -2  -1    7.38    0.57
  -3   2   1    7.15    0.60
   3   2  -1    7.82    0.48
   3   2  -1    8.59    0.62
  -3   2   1   10.81    0.85
  -2  -2   1  745.69   31.48
   2  -2  -1  817.16   31.53
   2  -2  -1  806.02   31.58
  -2   2   1  828.37   31.64
  -2   2   1  787.75   31.53
   2   2  -1  833.44   31.55
  -1  -2   1    8.17    0.35
   1  -2  -1    8.30    0.44
  -1  -2   1    8.06    0.44
   1  -2  -1    8.41    0.51
   1   2  -1    8.56    0.44
  -1   2   1    7.59    0.49
   1   2  -1    7.73    0.35
  -1   2   1    8.07    0.44
   0  -2  -1  167.57    6.74
   0  -2   1  176.46    6.70
   0  -2  -1  146.40    6.73
   0  -2   1  176.41    6.73
   0   2  -1  178.82    6.73
   0   2   1  169.95    6.74
   0   2  -1  176.13    6.70
  -1  -2  -1   11.32    0.61
   1  -2   1   10.41    0.57
  -1  -2  -1   10.41    0.55
   1   2   1   10.39    0.55
  -1   2  -1   10.67    0.56
   1   2   1    9.95    0.64
  -2  -2  -1  385.80   15.06
  -2  -2  -1  387.38   15.03
   2  -2   1  357.70   15.07
  -2  -2  -1  386.77   15.05
  -2   2  -1  372.97   14.95
  -2   2  -1  379.01   15.09
   2   2   1  397.74   15.08
  -3  -2  -1  617.99   23.43
  -3  -2  -1  576.00   23.38
   3  -2   1  599.28   23.33
  -3  -2  -1  594.45   23.43
  -3   2  -1  585.96   23.47
  -3   2  -1  581.10   23.32
   3   2   1  601.40   23.43
  -4  -2  -1    2.33    0.54
  -4  -2  -1    2.27    0.49
  -4   2  -1    3.26    0.47
   4   2   1    2.87    0.55
   5  -2   1   14.03    1.02
  -5  -2  -1   14.82    1.21
  -5   2  -1   14.69    1.27
   5   2   1   15.23    1.18
   6  -2   1    5.55    0.86
  -6  -2  -1    6.09    1.00
  -6   2  -1    5.46    0.99
   6   2   1    5.23    0.96
  -7  -2  -1    5.64    1.18
  -7   2  -1    5.35    1.24
  -8  -2  -1    3.50    1.59
  -8   2  -1    2.67    1.52
   9   3  -1    1.70    1.50
   8  -3  -1   26.30    1.98
  -8   3   1   25.21    2.59
   8   3  -1   28.93    2.19
   7  -3  -1   40.72    2.23
  -7  -3   1   38.62    2.59
  -7   3   1   38.36    2.76
   7   3  -1   37.31    2.25
   6  -3  -1  101.90    4.43
  -6  -3   1  103.89    4.56
  -6   3   1  107.58    4.79
   6   3  -1   97.09    4.46
  -5  -3   1   10.55    0.95
   5  -3  -1   10.28    0.87
   5   3  -1    7.59    0.70
   5   3  -1    9.61    0.87
  -5   3   1    9.88    1.16
   4  -3  -1  690.40   26.70
   4  -3  -1  644.79   26.70
  -4  -3   1  711.82   26.67
   4   3  -1  659.26   26.57
   4   3  -1  710.85   26.75
  -4   3   1  625.94   26.75
  -4   3   1  691.87   26.86
   3  -3  -1  314.77   12.58
  -3  -3   1  303.65   12.54
   3  -3  -1  322.43   12.54
  -3  -3   1  333.36   12.48
   3   3  -1  305.98   12.41
  -3   3   1  320.69   12.68
   3   3  -1  315.79   12.56
  -3   3   1  308.01   12.52
   2  -3  -1  260.07   10.62
  -2  -3   1  266.44   10.56
   2  -3  -1  269.94   10.55
  -2   3   1  266.02   10.55
  -2   3   1  265.59   10.68
   2   3  -1  268.32   10.57
   1  -3  -1   89.16    3.63
   1  -3  -1   89.53    3.69
  -1  -3   1   90.11    3.63
  -1   3   1   91.78    3.64
   1   3  -1   92.05    3.55
   1   3  -1   89.57    3.55
  -1   3   1   85.41    3.67
   1   3  -1   92.47    3.64
   0  -3   1   52.85    2.22
   0  -3  -1   54.52    2.24
   0  -3   1   53.45    2.20
   0  -3  -1   55.01    2.26
   0   3  -1   55.21    2.21
   0   3  -1   55.58    2.23
   0   3   1   56.30    2.25
   1  -3   1    9.31    0.55
  -1  -3  -1    9.82    0.63
  -1  -3  -1    9.33    0.53
   1   3   1    9.27    0.52
   1   3   1    8.75    0.65
  -1   3  -1   10.44    0.56
  -2  -3  -1  214.23    8.45
  -2  -3  -1  212.44    8.46
   2  -3   1  198.69    8.47
  -2  -3  -1  213.65    8.45
  -2   3  -1  209.51    8.35
  -2   3  -1  211.70    8.50
   2   3   1  225.09    8.52
  -3  -3  -1   30.42    1.57
  -3  -3  -1   34.17    1.56
   3  -3   1   32.80    1.42
  -3  -3  -1   30.90    1.52
  -3   3  -1   32.65    1.41
  -3   3  -1   34.05    1.61
   3   3   1   32.65    1.57
  -4  -3  -1    9.42    0.83
  -4  -3  -1    9.88    0.89
   4  -3   1    9.81    0.71
   4   3   1   11.11    1.01
  -4   3  -1   10.23    0.75
  -4   3  -1   10.83    0.95
   5  -3   1   21.82    1.28
  -5  -3  -1   25.62    1.50
   5   3   1   24.44    1.50
  -5   3  -1   23.77    1.56
   6  -3   1   33.42    1.86
  -6  -3  -1   36.43    2.09
  -6   3  -1   35.33    2.18
   6   3   1   36.70    2.11
  -7  -3  -1    2.45    1.06
  -7   3  -1    1.98    1.14
   7   3   1    3.04    1.12
  -8   3  -1   25.01    2.35
   9   4  -1   37.62    2.88
   8  -4  -1   22.69    2.00
  -8   4   1   20.31    2.47
   8   4  -1   25.05    2.14
   7  -4  -1   16.73    1.51
   7   4  -1   15.28    1.43
  -7   4   1   16.53    1.91
   6  -4  -1  167.93    6.91
  -6  -4   1  157.64    6.95
   6   4  -1  170.38    7.00
  -6   4   1  170.03    7.24
  -5  -4   1   14.97    0.96
  -5  -4   1   13.73    1.12
   5  -4  -1   14.34    1.03
   5   4  -1   13.66    1.10
  -5   4   1   17.71    1.45
   4  -4  -1  115.54    4.97
  -4  -4   1  123.93    4.93
   4   4  -1  120.46    5.04
  -4   4   1  123.40    5.22
  -3  -4   1  162.12    6.20
  -3  -4   1  147.22    6.32
  -3  -4   1  157.46    6.16
   3  -4  -1  153.86    6.38
   3  -4  -1  158.02    6.30
   3   4  -1  156.79    6.44
  -3   4   1  151.13    6.29
  -3   4   1  160.63    6.50
   2  -4  -1  592.76   22.41
  -2  -4   1  562.62   22.42
   2  -4  -1  535.98   22.49
  -2   4   1  570.42   22.40
   2   4  -1  596.13   22.44
  -2   4   1  554.89   22.54
  -1  -4   1  104.96    4.25
  -1  -4   1  102.70    4.15
   1   4  -1  104.31    4.25
   1   4  -1  109.08    4.18
   0  -4   1   19.96    0.93
   0  -4  -1   22.26    0.99
   0  -4  -1   20.53    0.96
   0  -4  -1   21.15    1.00
   0   4   1   21.63    0.97
   0   4  -1   19.95    0.93
   0   4  -1   22.16    0.94
  -1  -4  -1  515.61   20.42
   1  -4   1  535.61   20.38
  -1  -4  -1  501.45   20.50
   1  -4   1  543.69   20.45
  -1   4  -1  540.50   20.45
   1   4   1  506.36   20.41
   1   4   1  489.10   20.53
   2  -4   1    0.46    0.17
   2  -4   1    0.37    0.33
  -2  -4  -1   -0.03    0.31
  -2  -4  -1    0.48    0.28
   2   4   1    0.58    0.37
   2   4   1    0.72    0.25
  -2   4  -1    0.27    0.16
  -2   4  -1    0.47    0.30
   3  -4   1  275.63   10.64
  -3  -4  -1  265.21   10.75
  -3  -4  -1  261.53   10.73
  -3  -4  -1  268.88   10.73
  -3   4  -1  267.23   10.82
  -3   4  -1  275.37   10.64
   3   4   1  270.41   10.81
   4  -4   1  197.57    8.08
  -4  -4  -1  203.02    8.20
  -4   4  -1  204.39    8.09
   4   4   1  208.52    8.28
  -4   4  -1  199.96    8.30
   5  -4   1    2.33    0.56
  -5  -4  -1    2.12    0.65
   5   4   1    2.28    0.75
  -5   4  -1    1.83    0.70
   6  -4   1    1.10    0.69
  -6  -4  -1    1.18    0.81
  -6   4  -1    0.98    0.88
   6   4   1    2.54    0.91
  -7  -4  -1    1.14    1.06
  -7   4  -1    0.37    1.12
   7   4   1    1.45    1.07
  -8   4  -1    2.99    1.65
   8  -5  -1    6.65    1.29
   8   5  -1    8.89    1.43
  -8   5   1    7.56    1.96
   7  -5  -1   36.54    2.12
  -7   5   1   37.90    2.82
   7   5  -1   36.90    2.29
   6  -5  -1  123.20    5.44
  -6   5   1  129.86    5.85
   6   5  -1  134.00    5.57
   5  -5  -1   11.39    0.97
  -5  -5   1   11.95    1.01
  -5   5   1   12.98    1.32
   5   5  -1   13.12    1.06
  -4  -5   1   16.17    0.89
  -4  -5   1   15.01    0.80
   4  -5  -1   16.12    0.97
  -4   5   1   14.61    1.34
   4   5  -1   14.56    1.01
   3  -5  -1   13.61    1.02
  -3  -5   1   13.22    0.61
   3  -5  -1   12.82    0.80
  -3  -5   1   13.97    0.65
  -3  -5   1   13.25    0.90
  -3   5   1   15.01    1.16
  -3   5   1   11.90    0.83
   3   5  -1   13.82    0.85
  -2  -5   1  159.78    6.69
   2  -5  -1  170.80    6.67
  -2   5   1  163.51    6.66
  -2   5   1  162.26    6.83
   2   5  -1  173.70    6.71
  -1  -5   1  463.28   18.49
  -1  -5   1  470.52   18.59
   1  -5  -1  458.09   18.65
   1  -5  -1  475.49   18.58
   1   5  -1  484.40   18.59
  -1   5   1  491.57   18.59
  -1   5   1  456.20   18.65
   0  -5  -1  522.45   20.78
   0  -5   1  505.36   20.72
   0  -5  -1  554.19   20.81
   0  -5  -1  522.55   20.75
   0   5  -1  514.65   20.72
   0   5  -1  536.90   20.74
   0   5   1  533.59   20.75
   1  -5   1  492.40   20.65
  -1  -5  -1  525.40   20.79
   1  -5   1  511.74   20.70
  -1  -5  -1  535.86   20.67
   1  -5   1  542.22   20.62
   1   5   1  551.68   20.67
   1   5   1  515.70   20.81
   2  -5   1  166.22    6.94
   2  -5   1  170.16    6.78
  -2  -5  -1  171.77    6.87
   2   5   1  175.07    6.87
  -2   5  -1  178.24    7.04
  -2   5  -1  167.57    6.79
   2   5   1  172.74    7.01
  -3  -5  -1   49.83    2.17
  -3  -5  -1   49.45    2.27
   3  -5   1   48.85    2.06
  -3  -5  -1   49.21    2.18
  -3   5  -1   50.10    2.07
   3   5   1   49.67    2.30
  -3   5  -1   49.55    2.29
  -4  -5  -1   29.25    1.49
   4  -5   1   28.22    1.37
  -4   5  -1   29.80    1.41
   4   5   1   31.69    1.64
  -4   5  -1   28.99    1.64
  -5  -5  -1  161.07    6.72
   5  -5   1  159.28    6.58
  -5   5  -1  164.26    6.88
   5   5   1  165.79    6.82
  -6  -5  -1    2.75    0.87
   6   5   1    2.19    0.89
  -6   5  -1    1.49    0.92
  -7  -5  -1    3.27    1.15
   7   5   1    2.64    1.15
  -7   5  -1    1.52    1.21
  -8   5  -1   47.34    3.41
   8  -6  -1   37.61    2.45
   8   6  -1   39.07    2.57
  -8   6   1   32.10    2.99
   7  -6  -1   45.92    2.47
   7   6  -1   47.42    2.63
  -7   6   1   46.26    3.18
  -6  -6   1   76.97    3.49
   6  -6  -1   75.18    3.45
   6   6  -1   75.17    3.58
  -6   6   1   81.85    3.96
   5  -6  -1   67.59    3.20
  -5  -6   1   75.72    3.17
  -5  -6   1   73.20    3.19
  -5   6   1   75.73    3.60
   5   6  -1   73.22    3.31
  -4  -6   1   25.16    1.19
  -4  -6   1   23.56    1.12
   4  -6  -1   26.04    1.32
   4   6  -1   25.14    1.40
  -4   6   1   28.15    1.77
  -3  -6   1    1.73    0.21
   3  -6  -1    2.16    0.39
   3  -6  -1    1.32    0.64
  -3  -6   1    1.85    0.22
  -3   6   1    1.46    0.43
  -3   6   1    2.74    0.70
   3   6  -1    1.95    0.41
   2  -6  -1   55.62    2.43
   2  -6  -1   61.53    2.27
  -2  -6   1   47.28    2.27
   2   6  -1   45.21    2.25
  -1  -6   1  153.10    6.02
   1  -6  -1  154.34    6.10
   1  -6  -1  140.90    6.17
  -1  -6   1  152.55    6.11
  -1   6   1  145.40    6.18
  -1   6   1  149.20    6.09
   1   6  -1  156.07    6.04
   1   6  -1  158.51    6.11
   0  -6  -1  608.50   23.67
   0  -6   1  602.41   23.57
   0  -6   1  593.57   23.59
   0  -6  -1  580.54   23.59
   0   6  -1  602.73   23.60
   0   6  -1  615.31   23.57
   0   6   1  590.30   23.59
  -1  -6  -1   17.68    0.88
  -1  -6  -1   16.14    1.08
   1  -6   1   17.89    0.95
  -1   6  -1   17.39    0.92
   1   6   1   17.85    1.09
   1   6   1   17.85    0.87
   2  -6   1   42.15    1.65
  -2  -6  -1   35.21    1.73
   2  -6   1   40.59    1.61
  -2  -6  -1   33.92    1.83
   2  -6   1   39.01    1.81
   2   6   1   34.63    1.68
  -2   6  -1   42.02    1.81
   2   6   1   37.90    1.90
  -3  -6  -1   53.23    2.30
  -3  -6  -1   49.88    2.30
  -3  -6  -1   50.97    2.51
   3  -6   1   54.08    2.21
  -3   6  -1   54.91    2.45
   3   6   1   54.92    2.49
  -3   6  -1   51.91    2.21
  -4  -6  -1    3.44    0.56
   4   6   1    2.42    0.65
   5  -6   1   90.37    3.87
  -5  -6  -1   94.91    4.02
   5   6   1   94.08    4.16
  -5   6  -1   91.62    4.20
  -6  -6  -1  205.26    8.53
  -6   6  -1  208.54    8.75
   6   6   1  204.00    8.63
  -7  -6  -1   36.40    2.44
  -7   6  -1   36.76    2.70
   7   6   1   39.48    2.55
  -8   6  -1    2.38    1.66
   8   7  -1   28.08    2.31
  -8   7   1   26.87    2.72
   7  -7  -1    2.04    0.93
  -7   7   1    1.95    1.46
  -6  -7   1    3.19    0.86
   6  -7  -1    3.15    0.76
   6   7  -1    2.41    0.84
  -6   7   1    4.94    1.31
  -5  -7   1   64.22    2.73
   5  -7  -1   53.17    2.80
   5   7  -1   72.68    3.00
  -5   7   1   60.61    3.26
  -4  -7   1    5.03    0.42
  -4  -7   1    5.16    0.45
   4  -7  -1    4.69    0.61
   4   7  -1    4.43    0.65
  -4   7   1    6.16    1.04
   3  -7  -1   60.05    2.68
   3   7  -1   67.89    2.78
  -3   7   1   59.04    2.70
  -3   7   1   62.21    2.98
  -2  -7   1    4.40    0.55
   2  -7  -1    5.24    0.74
  -2  -7   1    4.12    0.38
   2  -7  -1    5.59    0.51
  -2   7   1    4.83    0.51
   2   7  -1    4.55    0.49
  -2   7   1    5.33    0.73
  -1  -7   1  498.72   19.83
  -1  -7   1  512.50   19.93
   1  -7  -1  524.28   19.92
  -1   7   1  482.44   19.97
   1   7  -1  506.26   19.85
  -1   7   1  479.14   19.98
   1   7  -1  523.15   19.92
   0  -7   1  160.73    6.65
   0  -7  -1  166.41    6.68
   0  -7  -1  166.09    6.83
   0  -7   1  166.92    6.69
   0   7  -1  160.03    6.65
   0   7   1  170.46    6.76
   0   7  -1  169.52    6.70
   0   7   1  164.79    6.68
  -1  -7  -1    1.82    0.54
   1  -7   1    1.37    0.42
  -1  -7  -1    1.18    0.32
   1  -7   1    1.22    0.38
   1   7   1    1.69    0.31
  -1   7  -1    1.16    0.31
   1   7   1    1.81    0.47
   2  -7   1  200.22    7.86
  -2  -7  -1  193.40    7.93
   2  -7   1  194.82    7.81
  -2  -7  -1  196.49    8.03
   2   7   1  197.37    8.10
   2   7   1  200.44    7.87
  -2   7  -1  194.24    7.98
  -3  -7  -1    3.12    0.56
   3  -7   1    3.42    0.39
   3   7   1    4.32    0.71
   3   7   1    3.01    0.45
  -3   7  -1    3.47    0.43
  -3   7  -1    4.20    0.64
   4  -7   1  249.76    9.98
  -4  -7  -1  252.65   10.09
  -4   7  -1  249.36   10.00
  -4   7  -1  249.93   10.27
   4   7   1  253.65   10.27
   5  -7   1    9.39    0.90
  -5  -7  -1   12.08    1.01
  -5   7  -1   13.23    1.31
   5   7   1   11.30    1.20
  -6  -7  -1    8.52    1.08
   6   7   1    8.25    1.21
  -7   7  -1   90.05    4.56
   7   7   1   88.46    4.39
  -8   7  -1   45.12    3.42
   8   8  -1   24.27    2.10
  -8   8   1   20.74    2.54
   7  -8  -1    4.58    1.00
  -7   8   1    3.85    1.61
   7   8  -1    5.33    1.15
   6  -8  -1    5.26    0.86
  -6   8   1    6.72    1.39
   6   8  -1    6.13    1.03
  -5  -8   1  158.54    6.46
   5  -8  -1  164.39    6.61
   5   8  -1  155.59    6.73
  -5   8   1  160.88    7.00
   4  -8  -1   25.83    1.38
  -4  -8   1   25.25    1.17
  -4  -8   1   26.72    1.16
   4   8  -1   24.73    1.48
  -4   8   1   24.93    1.82
   3  -8  -1   95.87    4.20
  -3   8   1  119.62    4.59
  -3   8   1  102.70    4.23
   3   8  -1   90.86    4.26
  -2  -8   1   47.41    2.09
   2  -8  -1   49.75    2.18
   2  -8  -1   47.14    2.40
  -2  -8   1   50.13    2.28
   2   8  -1   51.48    2.02
  -2   8   1   53.55    2.48
  -2   8   1   47.62    2.19
   2   8  -1   49.36    2.24
   1  -8  -1   75.40    3.23
  -1  -8   1   74.72    3.26
   1  -8  -1   73.39    3.34
  -1  -8   1   75.09    3.17
   1  -8  -1   81.97    3.25
   1   8  -1   73.25    3.23
   1   8  -1   79.09    3.19
   0  -8   1    0.93    0.40
   0  -8  -1    0.96    0.49
   0  -8   1    0.94    0.37
   0   8  -1    0.50    0.32
   0   8  -1    0.65    0.35
   0   8   1    0.35    0.32
   0   8   1    0.44    0.38
   1  -8   1  221.09    8.92
   1  -8   1  216.56    8.93
  -1  -8  -1  212.05    9.03
   1   8   1  216.91    9.06
   1   8   1  224.20    8.85
  -1   8  -1  231.01    8.94
  -1   8  -1  228.56    8.88
  -2  -8  -1  568.81   22.56
   2  -8   1  583.32   22.57
   2  -8   1  572.48   22.51
   2   8   1  578.88   22.55
   2   8   1  568.73   22.79
  -2   8  -1  559.64   22.68
  -3  -8  -1   42.23    1.99
   3  -8   1   44.38    1.88
   3   8   1   46.10    2.24
   3   8   1   41.03    2.03
  -3   8  -1   43.75    2.16
   4  -8   1  198.89    7.83
  -4  -8  -1  199.45    7.93
  -4   8  -1  190.74    7.84
   4   8   1  194.91    8.15
  -4   8  -1  193.35    8.14
  -5  -8  -1    4.66    0.74
   5  -8   1    4.74    0.66
  -5   8  -1    4.51    0.98
   5   8   1    4.86    0.96
  -6  -8  -1   42.31    2.26
   6   8   1   37.50    2.45
  -6   8  -1   40.80    2.56
  -7   8  -1    1.09    1.30
   7   8   1    0.19    1.18
  -8   8  -1    0.38    1.67
   8   9  -1    4.49    1.37
  -8   9   1    1.27    1.84
   7  -9  -1  106.13    4.77
  -7   9   1  111.07    5.48
   7   9  -1  106.73    4.98
   6  -9  -1    2.41    0.75
   6   9  -1    3.38    0.94
  -6   9   1    3.93    1.36
  -5  -9   1   89.82    3.80
   5  -9  -1   93.47    3.98
   5   9  -1   90.45    4.13
  -5   9   1   94.16    4.46
  -4  -9   1   11.36    0.69
  -4  -9   1   12.08    0.71
   4  -9  -1   12.97    0.94
  -4   9   1   15.01    1.42
   4   9  -1   13.66    1.09
  -3  -9   1  892.01   35.27
   3  -9  -1  892.08   35.42
   3   9  -1  903.92   35.52
  -3   9   1  915.47   35.71
   3   9  -1  894.14   35.23
  -2  -9   1   11.69    0.82
  -2   9   1   16.51    1.31
   2   9  -1   13.65    0.91
   2   9  -1   13.13    0.69
  -2   9   1   13.22    0.91
  -1  -9   1   25.18    1.34
  -1  -9   1   25.43    1.46
   1  -9  -1   27.96    1.38
   1  -9  -1   28.16    1.41
   1  -9  -1   28.11    1.57
  -1   9   1   25.54    1.49
   1   9  -1   28.50    1.40
   1   9  -1   27.61    1.36
   0  -9   1   32.60    1.79
   0  -9  -1   33.32    1.84
   0  -9  -1   34.11    1.72
   0   9   1   36.47    1.69
   0   9  -1   35.85    1.67
   0   9   1   37.35    1.79
   0   9  -1   34.13    1.71
  -1  -9  -1   48.56    2.09
   1  -9   1   42.40    2.17
  -1  -9  -1   49.40    2.36
   1  -9   1   45.97    2.20
   1   9   1   43.74    2.29
  -1   9  -1   47.51    2.11
   1   9   1   49.73    2.07
  -2  -9  -1    0.89    0.47
   2  -9   1    0.32    0.31
   2  -9   1    0.72    0.50
   2   9   1    0.66    0.36
  -2   9  -1    1.04    0.48
   3  -9   1   74.03    3.22
   3  -9   1   75.79    3.17
  -3  -9  -1   75.16    3.27
   3   9   1   78.35    3.54
  -3   9  -1   80.34    3.47
  -4  -9  -1   80.24    3.46
   4  -9   1   74.90    3.35
   4   9   1   93.11    3.80
  -4   9  -1   74.80    3.69
   5  -9   1   37.75    1.82
  -5  -9  -1   37.22    1.95
  -5   9  -1   40.85    2.33
   5   9   1   36.84    2.26
  -6  -9  -1    2.57    0.87
   6   9   1    2.81    1.07
  -6   9  -1    0.78    1.06
  -7   9  -1   10.40    1.69
   7   9   1   10.45    1.65
  -8   9  -1    6.99    1.93
   8  10  -1   12.37    1.70
  -8  10   1   15.73    2.38
   7 -10  -1   -0.98    0.89
  -7  10   1    2.40    1.59
   7  10  -1    0.68    1.01
   6 -10  -1   27.63    1.76
  -6  10   1   33.27    2.61
   6  10  -1   29.86    1.99
  -5 -10   1  365.74   14.80
   5 -10  -1  376.99   14.99
   5  10  -1  380.30   15.17
  -5  10   1  375.48   15.40
   4 -10  -1   83.63    3.69
  -4 -10   1   85.01    3.49
  -4 -10   1   83.29    3.46
  -4  10   1   91.30    4.15
   4  10  -1   88.81    3.85
  -3 -10   1  134.64    5.51
   3 -10  -1  140.95    5.66
  -3  10   1  139.60    5.99
   3  10  -1  134.93    5.44
   3  10  -1  135.61    5.75
  -2 -10   1    4.24    0.55
   2 -10  -1    4.14    0.54
   2  10  -1    4.11    0.61
   2  10  -1    4.06    0.41
   1 -10  -1  227.92    8.86
   1 -10  -1  226.91    8.88
  -1 -10   1  213.88    8.89
  -1 -10   1  200.36    8.78
   1 -10  -1  206.21    9.02
  -1  10   1  216.05    8.94
   1  10  -1  220.21    8.80
   1  10  -1  236.89    9.01
   0 -10  -1   35.11    1.73
   0 -10   1   33.05    1.70
   0 -10  -1   32.76    1.93
   0 -10   1   29.58    1.75
   0  10  -1   34.66    1.73
   0  10   1   34.81    1.67
   0  10   1   33.46    1.76
  -1 -10  -1  232.11    9.22
  -1  10  -1  222.86    9.24
  -1  10  -1  230.32    9.30
   1  10   1  237.77    9.21
   1  10   1  223.14    9.43
  -2 -10  -1   87.75    3.99
   2 -10   1  100.43    4.10
   2 -10   1   99.58    3.96
  -2  10  -1  100.21    4.16
   2  10   1   92.61    3.96
   2  10   1   92.55    4.28
   3 -10   1    2.90    0.47
  -3 -10  -1    3.23    0.66
   3 -10   1    2.45    0.59
   3  10   1    3.02    0.51
  -3  10  -1    4.29    0.77
   3  10   1    4.32    0.87
   4 -10   1  118.69    4.83
  -4 -10  -1  115.87    4.91
   4  10   1  117.97    5.23
  -4  10  -1  119.03    5.19
   5 -10   1   25.93    1.41
  -5 -10  -1   24.11    1.55
   5  10   1   26.07    1.92
  -5  10  -1   26.57    1.95
  -6 -10  -1    5.46    1.00
  -6  10  -1    6.17    1.37
   6  10   1    5.59    1.26
  -7  10  -1    1.09    1.41
   7  10   1    0.69    1.35
   8  11  -1    7.22    1.60
  -8  11   1    5.91    2.11
   7 -11  -1   89.74    4.15
  -7  11   1   91.69    4.91
   7  11  -1   90.98    4.45
   6 -11  -1    3.84    0.89
   6  11  -1    5.55    1.71
   5 -11  -1    2.09    0.70
   5  11  -1    7.22    1.02
  -5  11   1    4.42    1.20
   4 -11  -1    0.27    0.53
  -4 -11   1    0.05    0.29
  -4 -11   1    1.09    0.45
   4  11  -1    0.38    0.58
  -4  11   1    0.78    0.95
  -3 -11   1   55.53    2.38
   3 -11  -1   51.30    2.46
   3  11  -1   56.37    2.61
   3  11  -1   53.81    2.24
  -3  11   1   53.95    2.83
  -2 -11   1    3.47    0.61
   2 -11  -1    7.17    0.70
  -2  11   1    4.12    0.90
   2  11  -1    4.32    0.65
   2  11  -1    4.33    0.47
   1 -11  -1  820.97   32.03
  -1 -11   1  733.29   31.95
   1  11  -1  849.09   32.09
   1  11  -1  818.03   31.97
  -1  11   1  833.19   32.12
   0 -11   1   85.61    4.06
   0 -11  -1   92.86    4.03
   0 -11   1   89.84    4.01
   0  11  -1   95.88    4.01
   0  11  -1   97.88    4.09
   0  11   1   94.87    4.10
   0  11   1   94.85    4.00
   1 -11   1  159.31    7.34
  -1 -11  -1  181.00    7.27
   1  11   1  183.96    7.51
   1  11   1  183.59    7.34
  -1  11  -1  179.06    7.29
  -1  11  -1  183.58    7.35
  -2 -11  -1   69.15    3.09
   2 -11   1   70.60    3.03
   2 -11   1   73.61    3.21
  -2  11  -1   69.94    3.23
   2  11   1   71.33    3.39
   3 -11   1   44.69    2.24
   3 -11   1   46.95    2.08
   3  11   1   44.07    2.10
  -3  11  -1   46.89    2.41
   3  11   1   51.77    2.56
   4 -11   1  164.80    6.66
  -4  11  -1  166.32    7.05
   4  11   1  161.74    7.07
  -5 -11  -1    1.60    0.66
   5  11   1    2.02    1.02
  -5  11  -1    3.18    1.16
   6  11   1   10.76    1.52
  -6  11  -1    8.29    1.50
   7  11   1   15.12    1.93
  -7  11  -1   10.31    1.84
   8  12  -1   15.40    1.84
  -8  12   1   17.27    2.52
   7 -12  -1   19.30    1.72
   7  12  -1   18.79    1.88
  -7  12   1   15.54    2.19
   6 -12  -1   95.78    4.30
  -6  12   1   98.21    4.97
   6  12  -1   96.89    4.57
   5 -12  -1   13.38    1.14
  -5  12   1   15.37    1.78
   5  12  -1   12.53    1.29
   4 -12  -1   25.31    1.48
  -4 -12   1   26.40    1.19
  -4  12   1   26.89    2.10
   4  12  -1   23.76    1.64
  -3 -12   1  102.22    4.11
   3 -12  -1   94.47    4.18
  -3  12   1  100.35    4.58
   3  12  -1   97.21    4.32
   3  12  -1   97.42    3.97
   2 -12  -1    9.08    0.84
  -2 -12   1    9.42    0.86
  -2  12   1   12.26    1.23
   2  12  -1    8.60    0.75
   2  12  -1   10.63    0.96
  -1 -12   1   13.52    1.18
   1 -12  -1   16.94    1.15
   1  12  -1   14.95    1.17
   1  12  -1   17.78    1.15
   0 -12   1  172.78    7.68
   0  12   1  192.38    7.68
   0  12   1  187.71    7.79
   0  12  -1  194.77    7.76
   1 -12   1  209.36    8.50
  -1  12  -1  200.19    8.42
   1  12   1  203.76    8.35
  -1  12  -1  208.23    8.47
   1  12   1  209.10    8.62
   2 -12   1    6.39    0.95
   2 -12   1    5.58    0.66
   2  12   1    7.13    1.03
   2  12   1    5.75    0.64
  -2  12  -1    6.87    0.92
   3 -12   1    0.39    0.76
   3 -12   1    0.45    0.45
   3  12   1   -0.40    0.74
  -3  12  -1    1.08    0.71
   3  12   1    0.30    0.45
   4 -12   1    2.99    0.67
  -4  12  -1    1.48    0.88
   4  12   1    1.54    0.58
   4  12   1    3.10    1.00
  -5 -12  -1    1.04    0.68
   5  12   1    1.53    1.06
  -5  12  -1    1.54    1.01
  -6  12  -1  207.35    9.00
   6  12   1  205.64    8.99
   7  12   1    2.83    1.61
  -7  12  -1    2.84    1.51
  -8  13   1   44.77    3.89
   8  13  -1   39.61    2.92
   7 -13  -1    1.28    1.03
   7  13  -1    1.24    1.10
  -7  13   1    1.05    1.70
   6 -13  -1   13.33    1.30
  -6  13   1   14.28    1.96
   6  13  -1   14.13    1.56
   5 -13  -1   14.94    1.27
  -5  13   1   12.34    1.70
   5  13  -1   15.86    1.48
   4 -13  -1   19.05    1.32
  -4  13   1   24.70    2.03
   4  13  -1   19.98    1.53
   3 -13  -1   61.99    3.03
  -3 -13   1   69.72    2.99
   3  13  -1   68.56    2.81
   3  13  -1   68.68    3.20
  -3  13   1   69.56    3.43
   2 -13  -1  141.76    6.05
  -2 -13   1  137.45    5.98
  -2  13   1  155.19    6.31
   2  13  -1  145.29    5.90
   2  13  -1  146.13    6.16
  -1 -13   1   29.43    1.87
   1 -13  -1   36.45    1.87
   1  13  -1   36.77    1.83
  -1  13   1   35.46    1.99
   1  13  -1   35.87    1.93
   0  13   1   14.55    1.17
   0  13  -1   15.72    1.24
   0  13   1   13.88    1.26
   0  13  -1   15.25    1.23
  -1  13  -1   77.59    3.58
   1  13   1   80.69    3.74
  -1  13  -1   79.78    3.52
   1  13   1   77.69    3.44
   2 -13   1   69.24    3.15
   2 -13   1   65.32    2.91
   2  13   1   69.07    3.30
   2  13   1   63.17    2.88
  -2  13  -1   61.40    3.10
   3 -13   1   14.25    1.07
   3 -13   1   16.01    1.38
   3  13   1   18.83    1.66
   3  13   1   14.12    1.04
  -3  13  -1   13.53    1.33
   4 -13   1  168.07    6.75
  -4  13  -1  161.78    7.15
   4  13   1  165.67    7.22
   4  13   1  164.37    6.77
  -5 -13  -1   47.54    2.30
  -5  13  -1   42.85    2.72
   5  13   1   43.05    2.77
  -6  13  -1    8.11    1.50
   6  13   1    9.79    1.63
   7  13   1    1.94    1.58
  -7  13  -1   -0.10    1.43
  -8  14   1    0.90    2.09
   8  14  -1    1.06    1.40
   7  14  -1    3.61    1.26
  -7  14   1    6.00    1.92
   6 -14  -1   11.76    1.25
   6  14  -1    9.00    1.34
  -6  14   1   11.86    1.88
   5 -14  -1    0.47    0.70
   5  14  -1   -0.11    0.82
  -5  14   1    0.72    1.55
   4 -14  -1   11.35    1.06
  -4  14   1   11.03    1.48
   4  14  -1   10.52    0.71
   4  14  -1    9.51    1.11
   3 -14  -1   42.78    2.19
  -3 -14   1   44.98    2.20
   3  14  -1   43.88    2.34
   3  14  -1   42.79    1.93
  -3  14   1   44.90    2.65
  -2 -14   1   39.09    2.05
   2 -14  -1   36.49    1.98
   2  14  -1   37.51    1.86
  -2  14   1   41.75    2.31
   2  14  -1   38.45    2.13
  -1 -14   1   29.37    1.92
   1 -14  -1   33.93    1.84
   1  14  -1   33.81    1.94
   1  14  -1   33.15    1.94
  -1  14   1   35.73    1.96
   0  14   1   48.70    2.46
   0  14  -1   51.89    2.56
   0  14   1   50.00    2.59
   0  14  -1   50.05    2.52
  -1  14  -1   61.15    3.09
  -1  14  -1   64.52    3.04
   1  14   1   69.14    3.25
   1  14   1   65.29    2.94
   2 -14   1  178.98    7.40
   2  14   1  175.11    7.36
  -2  14  -1  186.52    7.63
   2  14   1  181.66    7.75
   3 -14   1  216.01    8.95
   3  14   1  233.26    9.43
   3  14   1  223.72    8.96
  -3  14  -1  213.42    9.25
   4 -14   1  150.52    6.00
   4  14   1  143.44    6.49
  -4  14  -1  142.14    6.39
   4  14   1  143.01    6.00
  -5 -14  -1    0.00    0.72
  -5  14  -1    1.41    1.03
   6  14   1   28.02    2.52
  -6  14  -1   27.83    2.53
   7  14   1    7.64    1.86
  -7  14  -1    6.09    1.72
   7  15  -1   19.16    1.99
  -7  15   1   28.06    2.80
   6 -15  -1   12.87    1.29
   6  15  -1    7.78    1.30
  -6  15   1    9.15    1.84
   5 -15  -1   26.34    1.82
  -5  15   1   30.80    2.61
   5  15  -1   31.23    2.10
   4 -15  -1  208.30    8.54
   4  15  -1  207.92    8.25
   4  15  -1  204.46    8.75
  -4  15   1  206.98    8.97
   3 -15  -1  300.30   12.24
   3  15  -1  299.54   12.00
   3  15  -1  309.21   12.43
  -3  15   1  300.32   12.55
   2 -15  -1   50.04    2.52
  -2 -15   1   52.22    2.59
   2  15  -1   51.36    2.39
   2  15  -1   50.96    2.68
  -2  15   1   54.53    2.83
   1 -15  -1    4.95    0.82
   1  15  -1    5.75    0.85
  -1  15   1    5.53    0.96
   1  15  -1    5.97    0.96
   0  15   1    1.51    0.68
   0  15  -1    0.65    0.72
   0  15  -1    1.83    0.76
   0  15   1    1.30    0.74
  -1  15  -1   25.99    1.71
   1  15   1   27.05    1.83
   1  15   1   21.49    1.47
   2 -15   1  117.25    4.96
   2  15   1  116.14    5.31
  -2  15  -1  119.89    5.21
   2  15   1  113.05    4.90
   3 -15   1   34.78    1.87
   3  15   1   38.27    2.44
   3  15   1   37.61    1.86
  -3  15  -1   33.44    2.24
   4 -15   1   21.59    1.42
   4  15   1   20.85    1.39
   4  15   1   23.08    2.10
   5  15   1   13.28    1.73
  -5  15  -1    7.10    1.38
  -6  15  -1   20.56    2.11
   6  15   1   27.08    2.51
  -7  15  -1   11.19    2.00
   7  15   1   11.72    2.09
  -7  16   1    8.69    2.06
   7  16  -1    9.04    1.65
   6 -16  -1   25.19    1.91
   6  16  -1   25.09    2.19
  -6  16   1   27.13    2.64
   5 -16  -1  223.52    9.17
   5  16  -1  211.39    9.41
  -5  16   1  230.62    9.71
   4 -16  -1   15.39    1.36
  -4  16   1   14.98    1.75
   4  16  -1   17.91    1.67
   3 -16  -1   12.16    1.14
   3  16  -1   10.95    1.26
   3  16  -1   10.94    0.92
   2 -16  -1  193.98    8.02
  -2 -16   1  188.97    7.96
  -2  16   1  195.05    8.22
   2  16  -1  191.32    8.14
   1 -16  -1  131.01    5.73
   1  16  -1  136.69    5.67
   1  16  -1  132.85    5.84
  -1  16   1  130.49    5.79
   0  16   1   85.99    3.96
   0  16  -1   86.31    4.05
   0  16  -1   89.07    4.00
   1  16   1    5.42    1.05
   1  16   1    6.60    0.89
  -1  16  -1    5.53    1.03
   2 -16   1   92.69    4.17
   2  16   1   98.29    4.54
  -2  16  -1   94.48    4.42
   2  16   1   94.76    4.11
   3 -16   1   77.89    3.51
   3  16   1   77.46    4.00
   3  16   1   78.17    3.48
  -3  16  -1   82.57    3.93
   4 -16   1    1.00    0.74
   4  16   1    0.81    1.34
  -4  16  -1    0.48    1.01
   4  16   1    1.19    0.69
  -5  16  -1   52.83    3.30
   5  16   1   57.39    3.45
   6  16   1    5.95    1.66
  -6  16  -1    4.19    1.52
  -7  16  -1    7.57    2.01
   7  16   1    7.45    2.02
   7  17  -1   18.41    2.04
  -7  17   1   18.57    2.43
   6 -17  -1   41.58    2.54
  -6  17   1   43.18    3.30
   6  17  -1   43.33    2.88
   5 -17  -1    3.17    0.96
  -5  17   1    4.32    1.48
   5  17  -1    3.71    1.20
   4 -17  -1   27.30    1.81
  -4  17   1   32.75    2.93
   4  17  -1   26.94    2.60
   3 -17  -1   42.08    2.28
   3  17  -1   40.51    1.99
  -3  17   1   44.91    2.71
   3  17  -1   41.64    2.48
   2 -17  -1  112.46    4.99
   2  17  -1  110.51    5.14
   2  17  -1  110.40    4.82
  -2  17   1  121.20    5.24
   1 -17  -1   87.41    4.06
  -1  17   1   90.29    4.16
   1  17  -1   86.01    4.19
   1  17  -1   90.96    4.02
   0 -17  -1  457.77   18.31
   0  17  -1  457.16   18.34
   0  17   1  446.49   18.24
   0  17  -1  453.35   18.26
   1 -17   1    5.15    0.95
  -1  17  -1    6.06    1.11
   1  17   1    3.38    0.82
   1  17   1    5.38    1.09
   2 -17   1    1.60    0.74
   2  17   1    5.22    1.14
  -2  17  -1    1.14    0.97
   2  17   1    2.16    0.70
   3 -17   1   14.72    1.24
  -3  17  -1   14.65    1.60
   3  17   1   19.81    1.92
   3  17   1   13.76    1.23
   4 -17   1   50.50    2.52
   4  17   1   49.78    2.46
  -4  17  -1   46.90    3.03
   4  17   1   55.00    3.19
   5  17   1   17.88    2.04
  -5  17  -1   17.27    1.92
   6  17   1    9.48    1.84
  -6  17  -1    9.31    1.85
   7  18  -1   67.01    4.07
  -7  18   1   71.74    4.59
   6 -18  -1   38.47    2.47
  -6  18   1   36.08    3.25
   6  18  -1   38.66    2.83
   5 -18  -1    0.50    0.89
  -5  18   1    1.00    1.35
   5  18  -1    0.51    1.09
   4 -18  -1    2.70    0.88
  -4  18   1    2.13    1.19
   4  18  -1    1.70    1.01
   3 -18  -1   38.38    2.16
  -3  18   1   36.99    2.54
   3  18  -1   34.03    2.33
   2 -18  -1  105.44    4.91
  -2  18   1  113.23    5.13
   2  18  -1  109.53    4.75
   2  18  -1  114.06    5.11
   1 -18  -1    9.79    1.23
   1  18  -1   13.56    1.48
  -1  18   1   11.20    1.32
   1  18  -1    8.80    1.13
   0 -18  -1    2.20    0.82
   0  18  -1    1.95    0.91
   1 -18   1  272.76   10.74
   1  18   1  252.83   10.66
   1  18   1  258.53   10.92
  -1  18  -1  257.80   10.85
   2 -18   1   93.02    4.11
  -2  18  -1   91.61    4.38
   2  18   1   87.91    4.02
   2  18   1   89.54    4.46
   3 -18   1    0.52    0.79
   3  18   1    0.17    0.70
   4 -18   1    0.91    0.82
  -4  18  -1    1.45    1.19
   4  18   1    1.62    0.81
   4  18   1    1.22    1.26
   5  18   1   52.42    3.38
  -5  18  -1   47.31    3.30
  -6  18  -1   21.38    2.37
   6  18   1   25.45    2.62
  -7  19   1    2.52    1.98
   7  19  -1    1.32    1.57
   6 -19  -1    0.12    1.33
  -6  19   1    0.86    1.69
   6  19  -1    0.49    1.39
   5 -19  -1    4.12    1.08
  -5  19   1    4.51    1.59
   5  19  -1    6.94    1.47
   4 -19  -1   92.02    4.18
  -4  19   1   88.39    4.56
   4  19  -1   87.62    4.45
   3 -19  -1    1.82    0.88
   3  19  -1    3.04    1.38
   3  19  -1    4.05    0.77
   2 -19  -1   93.08    4.31
   2  19  -1   96.83    4.14
  -2  19   1   92.63    4.49
   2  19  -1   88.19    4.48
   1 -19  -1   60.10    3.05
   1  19  -1   58.61    3.19
   1  19  -1   57.95    2.98
  -1  19   1   61.32    3.15
   0 -19  -1   13.42    1.38
   0  19  -1   15.79    1.53
   0  19   1   13.50    1.38
   0  19  -1   14.40    1.52
   1 -19   1   81.29    4.08
  -1  19  -1   84.27    4.24
   1  19   1   97.28    4.38
   1  19   1   92.34    4.09
   2 -19   1   17.84    1.57
   2  19   1   17.79    1.48
   2  19   1   17.89    1.82
  -2  19  -1   19.19    1.82
   3 -19   1    1.39    0.85
   3  19   1    0.99    0.78
  -3  19  -1    1.87    1.21
   3  19   1    1.42    1.15
   4 -19   1    9.16    1.16
  -4  19  -1    7.35    1.55
   4  19   1   11.22    1.78
   4  19   1    8.76    1.08
   5  19   1   63.44    3.91
  -5  19  -1   61.31    3.85
  -6  19  -1   10.34    2.06
   6  19   1   13.34    2.17
   6 -20  -1    1.93    1.24
  -6  20   1    0.50    1.70
   6  20  -1    1.78    1.52
   5  20  -1   11.90    1.71
  -5  20   1   11.21    1.79
   4 -20  -1    1.65    0.96
   4  20  -1    5.31    1.34
  -4  20   1    2.54    1.32
   3 -20  -1   -0.01    0.86
   3  20  -1    0.53    1.05
   3  20  -1    0.25    0.76
  -3  20   1    0.50    1.15
   2 -20  -1   22.23    1.80
   2  20  -1   21.11    1.67
  -2  20   1   24.21    2.04
   2  20  -1   23.23    2.03
   1 -20  -1   11.22    1.38
   1  20  -1   11.65    1.29
  -1  20   1   12.21    1.44
   1  20  -1   11.76    1.48
   0 -20  -1   27.17    1.94
   0  20  -1   25.59    2.07
   0  20  -1   26.57    2.05
   0  20   1   24.07    1.91
   1 -20   1   23.00    1.82
   1  20   1   22.96    2.01
  -1  20  -1   20.57    1.91
   1  20   1   20.28    1.73
   2 -20   1   19.92    1.65
  -2  20  -1   21.43    2.00
   2  20   1   17.34    1.81
   2  20   1   16.80    1.52
   3 -20   1  286.41   11.50
   3  20   1  269.76   11.42
  -3  20  -1  288.31   11.93
   3  20   1  281.31   11.94
   4 -20   1    3.03    1.87
   4  20   1    2.72    1.38
  -4  20  -1    2.28    1.43
   5  20   1    1.68    1.57
  -5  20  -1    1.78    1.59
  -6  20  -1    0.95    1.79
   6  20   1    1.39    1.82
   6  21  -1    5.40    1.67
  -6  21   1    3.69    1.78
   5 -21  -1    0.38    1.10
  -5  21   1    0.54    1.45
   5  21  -1    0.36    1.35
  -4  21   1  149.56    6.93
   4  21  -1  148.75    6.87
   3 -21  -1    8.07    1.25
  -3  21   1    5.31    1.45
   3  21  -1    6.16    1.43
   2 -21  -1   47.65    2.77
   2  21  -1   46.88    2.58
  -2  21   1   53.07    3.60
   2  21  -1   51.05    3.03
   1 -21  -1    2.71    1.01
  -1  21   1    2.47    1.08
   1  21  -1    4.36    1.24
   1  21  -1    3.18    1.03
   0  21  -1    1.86    1.07
   0  21   1    2.68    1.03
   0  21  -1    3.91    1.19
   1 -21   1  131.76    5.59
   1  21   1  122.14    5.77
  -1  21  -1  122.75    5.73
   1  21   1  120.74    5.50
   2 -21   1   35.16    2.31
   2  21   1   43.28    2.74
   2  21   1   38.24    2.25
  -2  21  -1   34.90    2.62
   3 -21   1    2.07    1.00
   3  21   1    2.89    1.42
  -3  21  -1    3.38    1.44
   3  21   1    1.58    0.90
  -4  21  -1    0.74    1.43
   4  21   1   -0.05    1.30
  -5  21  -1   56.91    3.80
   5  21   1   56.86    3.83
  -6  22   1   78.84    4.68
   6  22  -1   76.26    4.57
   5 -22  -1    0.41    1.16
   5  22  -1    2.38    1.52
  -5  22   1    2.19    1.51
   4 -22  -1   42.48    2.65
  -4  22   1   49.67    3.21
   4  22  -1   39.22    3.02
   3 -22  -1   10.37    1.39
   3  22  -1    8.36    1.62
  -3  22   1    5.35    1.43
   2 -22  -1  126.81    5.79
   2  22  -1  122.34    5.95
  -2  22   1  127.92    5.91
   2  22  -1  131.77    5.57
   1 -22  -1   10.93    1.46
  -1  22   1   12.03    1.54
   1  22  -1   12.70    1.45
   1  22  -1   10.25    1.73
   0 -22  -1    2.05    0.99
   0  22  -1    1.16    1.07
   0  22  -1    2.01    1.11
   0  22   1    1.25    1.01
   1 -22   1   30.81    2.11
   1  22   1   27.37    2.07
   1  22   1   27.20    2.31
  -1  22  -1   26.12    2.28
   2 -22   1    2.09    1.10
  -2  22  -1    2.68    1.36
   2  22   1    1.40    1.19
   2  22   1    2.01    0.97
   3 -22   1    1.21    1.04
   3  22   1    1.19    0.97
  -3  22  -1    2.38    1.46
   3  22   1    0.56    1.27
  -4  22  -1   39.35    3.21
   4  22   1   36.14    2.98
  -5  22  -1   26.19    2.77
   5  22   1   25.05    2.59
   5 -23  -1    0.08    1.25
   5  23  -1    2.44    1.61
  -5  23   1   -0.28    1.52
   4 -23  -1   34.55    2.43
   4  23  -1   31.69    2.89
  -4  23   1   35.52    2.94
   3 -23  -1    9.12    1.40
  -3  23   1    7.91    1.59
   3  23  -1    6.86    1.56
   2 -23  -1   13.99    1.58
   2  23  -1   11.13    1.67
  -2  23   1   11.74    1.62
   2  23  -1   13.96    1.45
   1 -23  -1   78.17    3.98
  -1  23   1   78.29    4.01
   1  23  -1   75.90    3.79
   1  23  -1   79.12    4.11
   0 -23  -1  172.40    7.48
   0  23  -1  161.83    7.63
   0  23  -1  174.29    7.42
   0  23   1  169.16    7.39
   1 -23   1   26.47    2.11
   1  23   1   26.91    2.08
  -1  23  -1   22.81    2.27
   1  23   1   26.68    2.34
   2 -23   1   11.92    1.50
   2  23   1   10.85    1.39
  -2  23  -1   10.41    1.73
   2  23   1   15.43    1.87
   3 -23   1    4.83    1.23
   3  23   1    2.91    1.09
  -3  23  -1    2.67    1.49
   3  23   1    2.47    1.37
  -4  23  -1    4.41    1.81
   4  23   1    4.79    1.76
   5  23   1    8.88    2.01
  -5  23  -1   10.19    2.23
   5 -24  -1   18.78    1.98
  -5  24   1   19.53    2.42
   5  24  -1   19.54    2.42
   4 -24  -1    2.07    1.23
  -4  24   1    1.54    1.52
   4  24  -1    0.38    1.49
   3 -24  -1    3.54    1.24
   3  24  -1    2.87    1.43
  -3  24   1    3.69    1.43
   2 -24  -1   86.23    4.26
  -2  24   1   80.92    4.35
   2  24  -1   83.97    4.46
   2  24  -1   86.71    4.05
   1 -24  -1   25.08    2.24
   1  24  -1   21.24    2.10
   1  24  -1   27.07    2.18
  -1  24   1   28.03    2.33
   0 -24  -1   58.29    3.26
   0  24  -1   54.54    3.23
   0  24  -1   54.06    3.31
   0  24   1   57.58    3.14
   1 -24   1    1.14    1.15
  -1  24  -1    2.28    1.36
   1  24   1    1.41    1.09
   2 -24   1   79.99    4.34
   2  24   1   80.47    3.92
   2  24   1   80.07    4.31
  -2  24  -1   81.13    4.39
   3  24   1    6.01    1.57
  -3  24  -1    7.44    1.82
   4  24   1   -0.29    1.52
  -4  24  -1    0.17    1.63
   4 -25  -1   28.73    2.42
  -4  25   1   22.93    2.41
   4  25  -1   26.72    2.68
   3 -25  -1   63.45    3.52
  -3  25   1   57.57    3.68
   3  25  -1   62.45    3.82
   2 -25  -1    2.75    1.20
   2  25  -1    4.68    1.50
   1 -25  -1   26.58    2.39
   1  25  -1   27.61    2.29
  -1  25   1   28.55    2.44
   1  25  -1   26.57    2.38
   0 -25  -1    7.56    1.47
   0  25   1    9.51    1.44
   0  25  -1   10.14    1.60
   1 -25   1    4.67    1.31
  -1 -25  -1    2.94    1.26
  -1  25  -1    2.61    1.44
   1  25   1    4.63    1.30
   2 -25   1   50.36    3.16
  -2  25  -1   54.20    3.49
   2  25   1   53.67    3.07
   2  25   1   58.60    3.48
   3 -25   1    8.57    1.55
  -3  25  -1   10.77    2.03
   3  25   1    8.42    1.77
   4  25   1    3.02    1.64
  -4  25  -1    3.11    1.84
   4 -26  -1   13.11    1.85
  -4  26   1   17.11    2.21
   4  26  -1   15.18    2.26
   3 -26  -1    2.39    1.35
   3  26  -1    1.15    1.47
  -3  26   1    2.74    1.51
   2 -26  -1   -0.23    1.21
  -2  26   1   -0.55    1.26
   2  26  -1    0.09    1.43
   1 -26  -1    5.91    1.45
   1  26  -1    2.80    1.37
   1  26  -1    7.06    1.61
  -1  26   1    5.48    1.47
   0 -26  -1    1.18    1.20
   0 -26   1    1.00    1.24
   0  26  -1    1.20    1.29
   0  26   1    0.77    1.21
  -1 -26  -1    2.58    1.30
   1 -26   1    1.69    1.32
  -1  26  -1    2.29    1.48
   1  26   1    2.53    1.27
   2 -26   1   52.71    3.17
   2  26   1   46.83    3.31
  -2  26  -1   52.56    3.45
   2  26   1   48.32    2.99
   3 -26   1   27.89    2.41
   3  26   1   23.39    2.35
  -3  26  -1   19.65    2.41
   3 -27  -1   44.59    3.20
   3  27  -1   47.11    3.48
  -3  27   1   53.72    3.48
   2 -27  -1    3.17    1.39
   2  27  -1    3.05    1.57
  -2  27   1    2.32    1.45
   1 -27  -1    3.48    1.34
   1  27  -1    3.17    1.34
   1  27  -1    3.06    1.49
  -1  27   1    2.46    1.32
   0 -27   1   12.45    1.78
   0 -27  -1   11.36    1.69
   0  27  -1   13.12    1.79
   0  27   1   11.93    1.75
  -1 -27  -1   57.60    3.48
   1 -27   1   59.98    3.44
  -1  27  -1   53.71    3.51
   1  27   1   53.21    3.33
   2 -27   1   11.32    1.77
  -2  27  -1    9.66    1.90
   2  27   1    8.01    1.70
   2  27   1    9.50    2.02
  -3  27  -1    3.52    1.82
   3  27   1    1.56    1.55
   3 -28  -1    7.01    1.70
   3  28  -1    6.79    1.90
  -3  28   1    6.53    1.81
   2 -28  -1    9.66    1.72
  -2  28   1    9.69    1.80
   2  28  -1   11.88    1.97
   1 -28  -1    6.49    1.59
   1  28  -1    7.48    1.77
  -1  28   1    7.14    1.61
   1  28  -1    6.73    1.65
   0 -28  -1   17.71    2.07
   0 -28   1   17.76    2.09
   0  28   1   15.71    1.94
   0  28  -1   15.93    1.97
   1 -28   1   15.66    2.01
  -1 -28  -1   16.09    2.04
   1  28   1   14.24    1.86
  -1  28  -1   14.56    2.01
  -2 -28  -1    0.80    1.28
   2 -28   1    1.15    1.50
  -2  28  -1    1.59    1.73
   1 -29  -1  105.36    5.18
  -1  29   1   99.30    5.15
   1  29  -1   99.89    5.28
   0 -29   1    1.68    1.50
   0 -29  -1    3.01    1.57
   0  29   1    2.32    1.50
   0  29  -1    3.18    1.59
   1 -29   1   17.79    2.18
  -1 -29  -1   14.87    2.11
   1  29   1   17.50    2.04
  -1  29  -1   16.38    2.20
   9   0  -2   -0.39    1.16
   8   0  -2   99.74    4.61
   7   0  -2    0.63    0.80
  -7   0   2    0.95    1.45
  -6   0   2  161.32    7.45
   6   0  -2  182.82    7.22
  -5   0   2    0.75    0.87
   5   0  -2    0.74    0.52
   5   0  -2    0.53    0.49
   4   0  -2  122.53    5.08
  -4   0   2  122.09    5.24
   4   0  -2  129.31    5.18
  -3   0   2    0.20    0.33
  -3   0   2    0.49    0.34
   3   0  -2    0.37    0.37
   2   0  -2  436.13   16.87
  -2   0   2  420.99   16.93
   2   0  -2  424.94   16.84
  -2   0   2  425.57   16.81
   1   0  -2    0.51    0.20
  -1   0   2    0.36    0.17
   1   0  -2    0.27    0.18
  -1   0   2    0.29    0.20
   0   0   2  453.39   18.37
   0   0  -2  476.84   18.37
   0   0   2  472.06   18.41
   0   0  -2  467.95   18.42
  -1   0  -2    0.76    0.25
  -1   0  -2    0.58    0.24
  -1   0  -2    0.32    0.15
  -1   0  -2    0.05    0.24
  -2   0  -2   50.56    2.15
  -2   0  -2   42.79    2.19
   2   0   2   52.39    2.05
  -2   0  -2   46.77    1.99
  -3   0  -2    0.25    0.29
  -3   0  -2    1.67    0.42
   3   0   2    0.69    0.50
  -4   0  -2   73.01    3.14
  -4   0  -2   79.73    3.40
   4   0   2   75.59    3.33
   5   0   2    0.58    0.80
  -5   0  -2    0.56    0.67
  -6   0  -2  151.04    6.55
  -7   0  -2    0.06    1.15
   9  -1  -2    4.99    1.33
   9   1  -2    4.38    1.30
   8  -1  -2   84.25    3.96
   8   1  -2   75.44    3.85
   7  -1  -2   37.00    2.18
  -7  -1   2   31.44    2.72
   7   1  -2   38.78    2.20
  -7   1   2   33.19    2.87
  -6  -1   2  133.39    6.63
   6  -1  -2  169.14    6.49
   6   1  -2  165.48    6.52
  -6   1   2  143.51    6.76
   5  -1  -2   78.90    3.27
  -5  -1   2   66.82    3.39
   5  -1  -2   71.38    3.18
   5   1  -2   73.70    3.11
  -5   1   2   66.95    3.74
   5   1  -2   77.69    3.27
  -4  -1   2    0.87    0.54
   4  -1  -2    0.89    0.48
   4  -1  -2    0.98    0.40
   4   1  -2    0.77    0.37
  -4   1   2    1.77    0.69
   4   1  -2    1.27    0.43
  -3  -1   2    0.79    0.37
  -3  -1   2    1.26    0.31
   3  -1  -2    0.67    0.42
  -3   1   2    0.36    0.35
  -3   1   2    2.35    0.45
   3   1  -2    0.63    0.32
  -2  -1   2  291.88   11.65
  -2  -1   2  296.18   11.50
   2  -1  -2  298.53   11.59
  -2   1   2  282.93   11.67
  -2   1   2  291.83   11.55
   2   1  -2  291.11   11.58
   2   1  -2  289.64   11.53
  -1  -1   2  730.45   28.57
   1  -1  -2  736.40   28.57
  -1   1   2  715.40   28.57
   0  -1   2  153.61    6.18
   0  -1  -2  156.49    6.21
   0  -1   2  160.02    6.24
   0  -1  -2  155.73    6.25
   0   1  -2  155.78    6.18
   0   1  -2  155.20    6.24
   0   1   2  156.54    6.25
  -1  -1  -2  280.45   11.03
  -1  -1  -2  283.81   11.11
  -1  -1  -2  268.99   11.08
  -1   1  -2  285.78   11.11
  -1   1  -2  276.13   11.11
   1   1   2  282.66   11.11
  -2  -1  -2   21.72    1.01
  -2  -1  -2   21.00    1.11
  -2  -1  -2   23.82    1.17
  -2   1  -2   21.00    1.11
   2   1   2   21.11    1.09
  -3  -1  -2    2.77    0.39
  -3  -1  -2    1.46    0.43
   3  -1   2    2.51    0.52
   3   1   2    3.19    0.64
  -3   1  -2    3.75    0.56
  -3   1  -2    2.22    0.30
  -4  -1  -2    5.59    0.73
   4  -1   2    5.25    0.73
  -4   1  -2    4.80    0.51
   4   1   2    3.35    0.76
  -4   1  -2    5.54    0.74
   5  -1   2   54.71    2.55
  -5  -1  -2   50.45    2.62
  -5   1  -2   51.27    2.65
  -6  -1  -2    2.31    0.97
  -6   1  -2    2.89    1.06
  -7  -1  -2    7.79    1.41
  -7   1  -2    5.86    1.34
   9  -2  -2    2.37    1.27
   9   2  -2    1.55    1.27
   8  -2  -2   16.82    1.61
  -8   2   2   13.55    2.33
   8   2  -2   12.87    1.46
   7  -2  -2    2.71    0.87
  -7  -2   2    2.56    1.51
   7   2  -2    3.52    0.87
  -7   2   2    3.90    1.61
   6  -2  -2   19.15    1.35
   6   2  -2   15.66    1.38
  -6   2   2   16.90    1.82
  -5  -2   2    2.25    0.81
   5  -2  -2    2.42    0.56
   5   2  -2    2.61    0.49
  -5   2   2    1.81    0.95
  -4  -2   2  613.28   23.28
   4  -2  -2  600.93   23.33
   4   2  -2  617.20   23.36
   4   2  -2  571.57   23.17
  -4   2   2  543.60   23.44
  -3  -2   2  287.73   11.49
   3  -2  -2  272.24   11.53
  -3  -2   2  291.91   11.36
   3   2  -2  297.99   11.39
  -3   2   2  284.40   11.53
  -3   2   2  282.46   11.48
   3   2  -2  298.46   11.53
  -2  -2   2   16.42    0.72
   2  -2  -2   14.92    0.90
   2  -2  -2   15.90    0.84
   2   2  -2   15.65    0.83
  -2   2   2   16.36    0.85
   2   2  -2   15.28    0.75
   1  -2  -2  129.89    5.52
   1  -2  -2  157.36    5.54
  -1  -2   2  126.01    5.46
  -1  -2   2  116.61    5.49
  -1   2   2  157.81    5.53
  -1   2   2  152.36    5.53
   1   2  -2  124.27    5.49
   0  -2  -2   25.18    1.12
   0  -2  -2   22.55    1.07
   0  -2   2   24.39    1.03
   0   2  -2   24.50    1.10
   0   2   2   24.18    1.09
   0   2  -2   24.01    1.09
   0   2   2   24.32    1.11
   0   2  -2   23.89    1.03
  -1  -2  -2  723.72   28.08
  -1  -2  -2  705.43   28.13
  -1  -2  -2  678.34   28.13
   1   2   2  722.90   28.13
  -1   2  -2  738.85   28.14
  -1   2  -2  720.15   28.13
  -2  -2  -2   11.25    0.73
  -2  -2  -2   10.58    0.76
  -2  -2  -2   11.70    0.70
  -2   2  -2   10.64    0.74
   2   2   2   11.77    0.82
  -3  -2  -2   40.60    1.88
  -3  -2  -2   37.42    1.75
  -3   2  -2   39.59    1.90
   3   2   2   39.60    1.97
   4  -2   2  119.81    4.98
  -4  -2  -2  120.72    5.11
  -4  -2  -2  116.11    4.96
  -4   2  -2  125.75    5.17
  -4   2  -2  122.79    4.88
   4   2   2  121.78    5.17
  -5  -2  -2   47.00    2.35
   5  -2   2   41.99    2.19
  -5   2  -2   46.75    2.41
   5   2   2   43.20    2.41
  -6  -2  -2    8.87    1.23
  -7  -2  -2   42.05    2.73
  -7   2  -2   44.13    2.76
   9  -3  -2   27.10    2.47
   9   3  -2   30.49    2.50
   8  -3  -2    3.51    1.14
  -8   3   2    3.29    1.99
   8   3  -2    1.89    1.03
   7  -3  -2   22.32    1.64
   7   3  -2   21.94    1.68
  -7   3   2   24.34    2.36
  -6  -3   2   39.57    2.49
   6  -3  -2   45.22    2.26
  -6   3   2   41.33    2.83
   6   3  -2   47.82    2.34
   5  -3  -2    0.78    0.50
  -5  -3   2    1.08    0.71
   5   3  -2    0.46    0.38
  -5   3   2    1.19    0.97
   5   3  -2    0.55    0.51
  -4  -3   2   13.63    0.86
   4  -3  -2   12.63    0.89
   4  -3  -2   11.26    1.04
   4   3  -2   12.52    0.69
   4   3  -2   12.65    0.92
  -4   3   2   15.86    1.45
   3  -3  -2  146.31    6.37
   3  -3  -2  157.00    6.38
  -3  -3   2  156.48    6.39
  -3  -3   2  157.63    6.12
  -3   3   2  145.04    6.26
  -3   3   2  157.17    6.38
   3   3  -2  161.39    6.31
   3   3  -2  156.25    6.13
  -2  -3   2   17.36    0.91
   2  -3  -2   16.33    0.99
   2  -3  -2   16.66    0.89
  -2  -3   2   16.99    0.74
   2   3  -2   18.14    0.89
  -2   3   2   17.70    0.93
   2   3  -2   17.15    0.77
  -2   3   2   15.97    0.90
  -1  -3   2  222.30    8.77
   1  -3  -2  219.32    8.79
   1  -3  -2  216.99    8.80
  -1   3   2  223.31    8.79
   1   3  -2  223.59    8.73
   1   3  -2  219.97    8.72
   1   3  -2  219.89    8.77
  -1   3   2  221.61    8.79
   0  -3  -2    8.00    0.51
   0  -3  -2    7.19    0.54
   0  -3   2    7.96    0.45
   0   3   2    8.11    0.52
   0   3   2    8.87    0.54
   0   3  -2    8.15    0.49
   0   3  -2    8.27    0.51
   0   3  -2    8.90    0.44
  -1  -3  -2  217.15    8.54
   1  -3   2  205.78    8.56
  -1  -3  -2  218.68    8.56
  -1  -3  -2  209.61    8.60
   1   3   2  221.19    8.56
  -1   3  -2  212.36    8.56
  -2  -3  -2  320.44   12.74
  -2  -3  -2  327.17   12.72
  -2   3  -2  319.40   12.77
   2   3   2  313.22   12.80
  -3  -3  -2  903.40   34.10
   3   3   2  800.69   34.15
  -3   3  -2  889.75   34.14
  -4  -3  -2    7.20    0.77
  -4  -3  -2    7.53    0.82
  -4   3  -2    6.68    0.86
   4   3   2   12.16    1.16
  -5  -3  -2   33.85    1.94
  -5   3  -2   34.79    2.04
   5   3   2   34.72    2.15
  -6  -3  -2   20.82    1.80
  -7  -3  -2   24.04    1.95
  -7   3  -2   17.38    1.86
   9  -4  -2    1.09    1.39
   9   4  -2    1.26    1.32
   8  -4  -2    3.64    1.12
  -8   4   2    2.69    1.97
   8   4  -2    2.62    1.09
   7  -4  -2    0.37    0.79
   7   4  -2    0.10    0.75
  -7   4   2    1.73    1.53
   6  -4  -2    1.84    0.68
  -6  -4   2    1.71    0.96
   6   4  -2    2.24    0.71
  -6   4   2    2.50    1.30
   5  -4  -2  234.91    9.51
  -5  -4   2  241.53    9.46
  -5   4   2  224.12    9.82
   5   4  -2  235.67    9.29
   5   4  -2  233.73    9.56
  -4  -4   2  255.15    9.75
   4  -4  -2  256.28    9.93
   4   4  -2  239.75    9.70
   4   4  -2  247.04    9.95
  -4   4   2  230.99   10.12
   3  -4  -2    1.28    0.60
   3  -4  -2    0.67    0.32
  -3   4   2    0.93    0.42
  -3   4   2    2.11    0.61
   3   4  -2    1.12    0.36
   2  -4  -2  672.06   25.86
  -2  -4   2  634.59   25.85
  -2   4   2  654.09   25.85
  -2   4   2  702.28   25.91
   2   4  -2  621.86   25.71
   2   4  -2  654.33   25.86
   1  -4  -2    9.01    0.56
  -1  -4   2    8.85    0.56
   1  -4  -2    8.89    0.61
   1   4  -2    8.97    0.54
  -1   4   2    9.11    0.61
  -1   4   2    8.26    0.59
   1   4  -2    9.08    0.48
   1   4  -2    8.71    0.47
   0  -4   2  109.23    3.83
   0  -4  -2   90.92    3.89
   0  -4  -2   81.47    3.92
   0   4  -2  108.25    3.89
   0   4   2   86.93    3.90
   0   4  -2  105.69    3.83
   0   4   2   82.91    3.89
  -1  -4  -2  606.61   23.56
  -1  -4  -2  611.75   23.55
  -1  -4  -2  580.74   23.61
   1  -4   2  568.00   23.54
  -1   4  -2  603.95   23.56
   1   4   2  612.29   23.54
  -2  -4  -2   76.65    3.24
  -2  -4  -2   74.46    3.26
   2   4   2   72.78    3.32
   2   4   2   75.61    3.20
  -2   4  -2   78.79    3.25
  -3  -4  -2  132.50    5.48
  -3  -4  -2  137.35    5.53
   3   4   2  129.47    5.67
  -3   4  -2  134.87    5.58
  -4  -4  -2   37.35    1.90
   4   4   2   37.38    2.15
  -4   4  -2   37.98    1.99
  -5  -4  -2  182.80    7.35
   5   4   2  176.12    7.48
  -5   4  -2  168.05    7.40
  -6  -4  -2   15.52    1.47
  -6   4  -2   15.44    1.57
   6   4   2   18.45    1.85
  -7  -4  -2   10.26    1.53
  -7   4  -2    8.87    1.50
   9  -5  -2   49.89    3.21
   9   5  -2   53.35    3.32
   8  -5  -2    1.63    1.05
  -8   5   2    1.47    1.99
   8   5  -2    1.83    1.08
   7  -5  -2    1.42    0.86
   7   5  -2    1.41    0.96
  -7   5   2    1.83    1.58
  -6  -5   2  145.47    6.25
   6  -5  -2  153.65    6.28
   6   5  -2  152.09    6.35
  -6   5   2  142.88    6.75
  -5  -5   2   32.60    1.63
   5  -5  -2   29.59    1.68
   5   5  -2   33.59    1.78
  -5   5   2   34.42    2.26
   4  -5  -2   90.07    3.83
  -4   5   2   85.07    4.12
   4   5  -2   94.03    3.90
   3  -5  -2  146.72    5.78
   3  -5  -2  132.50    5.91
   3   5  -2  147.81    5.80
  -3   5   2  135.79    6.06
  -2  -5   2  427.94   16.94
   2  -5  -2  411.69   17.02
   2  -5  -2  429.73   16.94
  -2   5   2  428.63   17.00
  -2   5   2  423.30   16.93
   2   5  -2  449.71   16.95
   2   5  -2  423.88   16.77
  -1  -5   2  292.99   12.20
   1  -5  -2  305.02   12.33
   1  -5  -2  310.94   12.25
   1   5  -2  312.39   12.22
  -1   5   2  318.89   12.27
   1   5  -2  310.33   12.16
   0  -5  -2  294.20   11.67
   0  -5  -2  298.11   11.69
   0  -5   2  288.65   11.57
   0  -5   2  276.15   11.61
   0  -5  -2  300.50   11.67
   0   5  -2  291.86   11.58
   0   5  -2  296.45   11.63
   0   5   2  301.13   11.66
  -1  -5  -2  121.84    4.86
  -1  -5  -2  117.37    4.97
   1  -5   2  109.13    4.85
  -1   5  -2  122.30    4.87
   1   5   2  123.68    4.86
  -2  -5  -2    8.48    0.80
  -2   5  -2    6.44    0.63
   2   5   2    8.48    0.67
   2   5   2    8.96    0.89
  -3  -5  -2    4.93    0.71
  -3  -5  -2    5.70    0.64
  -3   5  -2    5.48    0.69
   3   5   2    5.72    1.12
  -4  -5  -2    8.40    0.89
  -4   5  -2   11.65    1.10
   4   5   2   11.00    1.23
  -5  -5  -2  110.42    4.81
   5   5   2  109.61    5.03
  -5   5  -2  111.56    4.93
  -6  -5  -2   62.44    3.14
   6   5   2   62.87    3.46
  -6   5  -2   58.97    3.19
  -7  -5  -2    6.94    1.40
  -7   5  -2    4.47    1.36
   9  -6  -2    3.30    1.76
   9   6  -2    2.75    1.51
   8  -6  -2   50.84    2.86
   8   6  -2   54.31    3.01
  -8   6   2   46.34    3.91
   7  -6  -2  188.28    7.76
  -7   6   2  187.60    8.41
   7   6  -2  178.35    7.94
   6  -6  -2   49.39    2.46
  -6   6   2   54.63    3.23
   6   6  -2   47.86    2.54
   5  -6  -2    2.94    0.61
   5   6  -2    3.38    0.68
  -5   6   2    2.29    1.04
   4  -6  -2   58.36    2.68
   4   6  -2   62.38    2.75
  -4   6   2   59.98    3.06
   3  -6  -2   30.09    1.46
   3   6  -2   25.28    1.43
  -3   6   2   34.77    1.77
   2  -6  -2   25.25    1.49
  -2  -6   2   25.61    1.33
   2  -6  -2   28.07    1.32
  -2   6   2   28.33    1.37
  -2   6   2   26.33    1.44
   2   6  -2   27.88    1.32
   1  -6  -2  749.89   29.16
   1  -6  -2  723.04   29.18
  -1  -6   2  713.27   29.05
  -1  -6   2  705.60   29.11
   1   6  -2  761.11   29.13
  -1   6   2  764.98   29.19
   1   6  -2  744.02   29.06
  -1   6   2  761.42   29.16
   0  -6   2  179.87    7.47
   0  -6  -2  188.99    7.56
   0  -6   2  179.16    7.43
   0  -6  -2  189.15    7.52
   0  -6  -2  193.39    7.55
   0   6  -2  185.21    7.45
   0   6   2  193.72    7.52
   0   6  -2  186.79    7.48
  -1  -6  -2   13.70    1.12
   1   6   2   16.94    1.04
  -2  -6  -2    0.79    0.55
   2   6   2    1.51    0.61
  -2   6  -2    1.21    0.41
   2   6   2    0.86    0.37
  -3  -6  -2   14.49    1.01
  -3   6  -2   17.78    1.16
   3   6   2   15.29    1.37
  -4  -6  -2   42.60    2.09
   4   6   2   42.32    2.43
  -4   6  -2   42.40    2.20
  -5  -6  -2   56.57    2.69
   5   6   2   53.19    3.03
  -5   6  -2   53.79    2.82
  -6  -6  -2   29.06    1.99
   6   6   2   27.04    2.27
  -6   6  -2   25.25    2.07
  -7  -6  -2   50.53    3.10
  -7   6  -2   49.70    3.13
  -9   7   2   54.37    4.65
   9   7  -2   61.85    3.62
   8  -7  -2   79.14    3.92
   8   7  -2   83.60    4.10
  -8   7   2   77.42    4.81
   7  -7  -2   25.36    1.76
  -7   7   2   24.25    2.49
   7   7  -2   22.66    1.86
   6  -7  -2   13.09    1.19
   6   7  -2   15.71    1.36
  -6   7   2   17.61    1.99
   5  -7  -2  165.31    6.87
  -5   7   2  164.99    7.28
   5   7  -2  166.86    6.95
   4  -7  -2    5.14    0.67
  -4   7   2    5.92    1.06
   4   7  -2    7.01    0.78
   3  -7  -2  193.77    7.66
  -3   7   2  174.48    7.84
   3   7  -2  196.40    7.70
   2  -7  -2    4.90    0.72
   2  -7  -2    4.67    0.51
  -2  -7   2    3.83    0.51
  -2   7   2    6.68    0.81
   2   7  -2    4.45    0.30
  -2   7   2    5.67    0.59
   1  -7  -2  158.45    6.37
   1  -7  -2  157.90    6.41
  -1  -7   2  155.34    6.25
   1   7  -2  156.48    6.33
  -1   7   2  161.60    6.40
   1   7  -2  154.45    6.26
  -1   7   2  153.32    6.37
   0  -7  -2  415.54   16.63
   0  -7  -2  426.49   16.67
   0  -7   2  405.86   16.55
   0  -7  -2  426.05   16.69
   0   7  -2  420.98   16.57
   0   7  -2  419.06   16.59
   0   7   2  422.52   16.62
  -1  -7  -2    1.60    0.42
   1  -7   2    1.79    0.44
   1  -7   2    1.65    0.30
  -1  -7  -2    1.40    0.62
  -1   7  -2    1.56    0.35
  -1   7  -2    1.00    0.35
   1   7   2    2.54    0.53
  -2  -7  -2   79.12    3.51
  -2   7  -2   77.51    3.41
   2   7   2   83.15    3.36
   2   7   2   74.66    3.57
   3   7   2    0.56    0.44
   3   7   2    1.44    0.80
  -3   7  -2    0.84    0.52
  -4  -7  -2   72.99    3.31
  -4   7  -2   65.10    3.39
   4   7   2   86.77    3.72
  -5  -7  -2    0.56    0.68
   5   7   2    1.13    1.13
  -5   7  -2    1.15    0.77
  -6  -7  -2    2.78    0.98
  -6   7  -2    1.89    1.06
   6   7   2    2.93    1.42
  -7  -7  -2   27.47    2.42
  -7   7  -2   30.92    2.57
   8  -8  -2    1.50    1.12
   8   8  -2    0.59    1.14
  -8   8   2    0.35    1.91
   7  -8  -2   37.75    2.25
   7   8  -2   40.24    2.44
  -7   8   2   39.26    3.19
   6  -8  -2    1.20    0.69
   6   8  -2    1.49    0.78
  -6   8   2    1.74    1.31
   5  -8  -2  143.50    6.06
   5   8  -2  144.98    6.16
  -5   8   2  146.62    6.53
   4  -8  -2   87.42    3.73
  -4   8   2   84.15    4.09
   4   8  -2   86.23    3.79
   3  -8  -2  537.60   21.15
   3   8  -2  549.53   21.20
  -3   8   2  512.48   21.35
  -2  -8   2  198.13    8.00
   2  -8  -2  203.62    8.20
  -2   8   2  204.48    8.32
   2   8  -2  209.75    8.04
   2   8  -2  198.15    8.20
   1  -8  -2    2.87    0.56
   1  -8  -2    4.19    0.53
  -1  -8   2    2.59    0.35
  -1  -8   2    2.82    0.49
   1   8  -2    3.61    0.38
   1   8  -2    3.45    0.46
  -1   8   2    2.93    0.55
  -1   8   2    3.44    0.53
   0  -8   2   51.25    2.17
   0  -8  -2   48.76    2.34
   0  -8   2   54.48    2.20
   0  -8  -2   44.99    2.23
   0   8  -2   51.62    2.18
   0   8  -2   46.83    2.16
  -1  -8  -2   17.23    1.36
  -1  -8  -2   18.71    1.14
   1  -8   2   18.11    0.94
  -1   8  -2   17.24    1.02
   1   8   2   16.02    1.18
  -1   8  -2   17.96    0.99
   1   8   2   18.71    1.01
   2   8   2   84.33    3.65
  -2   8  -2   90.07    3.75
   2   8   2   84.77    3.92
   3   8   2    0.93    0.78
   3   8   2    0.81    0.45
  -3   8  -2    0.41    0.54
  -4  -8  -2  136.40    5.68
   4   8   2  134.99    6.04
  -4   8  -2  134.87    5.82
  -5  -8  -2    0.32    0.70
   5   8   2    0.03    1.13
  -6  -8  -2    1.70    0.96
  -6   8  -2    2.33    1.10
   6   8   2    4.16    1.51
  -7   8  -2   18.07    2.03
   8  -9  -2    6.54    1.33
   8   9  -2    4.98    1.33
  -8   9   2    6.60    2.13
   7  -9  -2   -0.06    0.83
   7   9  -2    1.88    1.01
   6  -9  -2   50.98    2.49
  -6   9   2   49.00    3.25
   6   9  -2   46.82    2.62
   5  -9  -2   52.29    2.75
   5   9  -2   70.27    2.95
  -5   9   2   56.47    3.33
   4  -9  -2   94.13    4.06
  -4   9   2   93.81    4.44
   4   9  -2   95.13    4.13
   3  -9  -2    3.14    0.55
  -3   9   2    7.11    1.04
   3   9  -2    3.40    0.56
  -2  -9   2   12.15    0.62
   2  -9  -2   11.53    0.85
  -2   9   2   12.13    1.10
   2   9  -2   12.65    0.86
   2   9  -2   12.23    0.75
  -1  -9   2   33.37    1.53
   1  -9  -2   34.80    1.66
  -1  -9   2   31.97    1.65
   1   9  -2   33.99    1.53
   1   9  -2   34.20    1.61
  -1   9   2   33.33    1.70
   0  -9  -2   32.49    1.69
   0  -9   2   32.41    1.62
   0   9  -2   33.82    1.59
   0   9  -2   35.47    1.62
   0   9   2   34.18    1.64
   1  -9   2   11.95    0.87
  -1   9  -2   12.14    0.88
  -1   9  -2   13.94    0.90
   1   9   2   15.33    1.22
   1   9   2   12.55    0.88
   2  -9   2  855.23   36.26
   2  -9   2  947.49   36.22
   2   9   2  895.65   36.62
  -2   9  -2  952.99   36.46
   2   9   2  964.84   36.37
   3   9   2   15.54    1.10
   3   9   2   17.79    1.61
  -3   9  -2   16.93    1.25
  -4  -9  -2   69.59    3.14
  -4   9  -2   69.38    3.31
   4   9   2   69.49    3.60
  -5  -9  -2    1.91    0.74
   5   9   2    1.49    1.26
  -5   9  -2    1.40    0.90
  -6  -9  -2   85.54    3.86
   6   9   2   82.30    4.38
  -6   9  -2   72.92    4.04
  -7   9  -2    2.75    1.47
   8 -10  -2    3.70    1.23
  -8  10   2    2.48    2.01
   8  10  -2    3.48    1.33
   7 -10  -2    4.97    1.04
  -7  10   2    3.88    1.70
   7  10  -2    5.11    1.19
   6 -10  -2   11.83    1.17
   6  10  -2   11.90    1.39
  -6  10   2   11.17    1.78
   5 -10  -2  112.51    4.83
  -5  10   2  120.50    5.41
   5  10  -2  106.19    4.93
   4 -10  -2    4.44    0.70
   4  10  -2    3.39    0.68
  -4  10   2    4.58    1.08
   3 -10  -2  202.21    8.35
   3  10  -2  202.83    8.40
  -3  10   2  211.19    8.63
  -2 -10   2  238.01    9.42
   2 -10  -2  239.86    9.63
  -2  10   2  231.74    9.76
   2  10  -2  242.27    9.64
   2  10  -2  238.03    9.48
  -1 -10   2   37.40    1.95
   1 -10  -2   40.23    1.94
  -1 -10   2   37.88    1.81
   1  10  -2   43.38    2.00
   1  10  -2   39.99    1.82
  -1  10   2   41.14    2.00
   0 -10   2  247.70   10.40
   0 -10  -2  255.52   10.51
   0  10  -2  261.32   10.41
   0  10   2  269.21   10.46
   0  10  -2  262.89   10.44
   1 -10   2   10.91    0.94
   1  10   2   12.93    1.19
  -1  10  -2   11.10    0.88
   1  10   2   10.03    0.84
   2 -10   2  159.67    7.06
   2 -10   2  184.12    6.98
  -2  10  -2  179.94    7.23
   2  10   2  168.90    7.40
   2  10   2  178.62    7.11
  -3  10  -2   31.47    1.80
   3  10   2   31.01    1.62
   3  10   2   30.75    2.13
  -4 -10  -2  281.99   11.29
  -4  10  -2  269.99   11.47
   4  10   2  285.91   11.69
  -5 -10  -2   32.34    1.95
  -5  10  -2   34.59    2.26
   5  10   2   35.78    2.62
  -6 -10  -2    0.75    0.96
   6  10   2    1.96    1.58
  -6  10  -2    1.91    1.17
  -7  10  -2    9.67    1.78
   8 -11  -2   20.68    1.83
   8  11  -2   21.59    2.07
  -8  11   2   16.09    2.55
   7 -11  -2   15.37    1.48
   7  11  -2   16.39    1.69
  -7  11   2   12.21    2.12
   6 -11  -2    6.62    1.00
   6  11  -2    6.82    1.11
  -6  11   2    5.02    1.57
   5 -11  -2   97.85    4.37
  -5  11   2  103.32    4.93
   5  11  -2   99.18    4.50
   4 -11  -2   68.20    3.09
   4  11  -2   68.51    3.18
  -4  11   2   67.21    3.52
   3 -11  -2   52.73    2.50
  -3  11   2   54.99    2.84
   3  11  -2   53.87    2.55
   2 -11  -2  110.62    4.62
  -2 -11   2  105.64    4.41
   2  11  -2  113.00    4.63
   2  11  -2  107.62    4.47
  -2  11   2  106.36    4.77
   1 -11  -2   60.52    2.69
   1  11  -2   59.51    2.65
   1  11  -2   57.31    2.56
  -1  11   2   55.75    2.72
   0 -11   2  700.34   28.69
   0 -11   2  719.05   28.70
   0 -11  -2  736.22   28.81
   0  11  -2  721.69   28.68
   0  11  -2  731.10   28.73
   0  11   2  749.34   28.73
   1 -11   2    2.02    0.74
   1  11   2    1.47    0.47
  -1  11  -2    1.65    0.51
   1  11   2    1.74    0.70
  -1  11  -2    1.57    0.57
   2 -11   2   32.21    1.52
   2 -11   2   28.27    1.73
  -2  11  -2   34.13    1.80
   2  11   2   33.02    1.65
   3 -11   2    1.79    0.41
   3  11   2    0.29    0.52
   3  11   2    1.36    0.95
  -3  11  -2    1.01    0.65
  -4  11  -2   13.81    1.35
   4  11   2   15.80    1.70
  -5 -11  -2    0.85    0.75
   5  11   2    0.67    1.26
  -5  11  -2    1.61    1.04
  -6 -11  -2  102.40    4.65
  -6  11  -2  100.06    4.95
   6  11   2  102.10    5.30
  -7  11  -2   12.54    1.99
   8 -12  -2    5.85    1.34
  -8  12   2    4.31    2.18
   8  12  -2    4.72    1.49
   7 -12  -2  160.16    7.10
  -7  12   2  167.72    7.83
   7  12  -2  169.56    7.31
   6 -12  -2    0.89    0.77
   6  12  -2    0.55    0.90
   5 -12  -2    2.28    0.74
   5  12  -2    3.12    0.89
  -5  12   2    3.65    1.27
   4 -12  -2   18.09    1.27
  -4  12   2   21.25    1.84
   4  12  -2   16.75    1.37
   3 -12  -2    1.08    0.53
  -3  12   2    1.79    0.88
   3  12  -2    0.75    0.57
   2 -12  -2  302.67   12.06
  -2 -12   2  295.08   11.86
   2  12  -2  298.25   11.90
  -2  12   2  294.97   12.20
   2  12  -2  302.18   12.08
   1 -12  -2  308.84   12.36
  -1 -12   2  290.49   12.20
  -1  12   2  307.62   12.39
   1  12  -2  317.81   12.33
   1  12  -2  303.54   12.23
   0 -12   2    8.79    0.97
   0 -12  -2    7.73    0.88
   0  12  -2    6.39    0.89
   0  12   2   11.39    0.95
   1 -12   2   15.20    1.38
  -1  12  -2   17.50    1.21
   1  12   2   17.34    1.45
   1  12   2   17.10    1.14
  -1  12  -2   18.30    1.23
   2 -12   2   42.56    1.89
   2 -12   2   35.52    2.13
   2  12   2   41.60    1.98
   2  12   2   43.20    2.43
  -2  12  -2   39.78    2.12
   3 -12   2   53.04    2.33
  -3  12  -2   50.75    2.72
   3  12   2   57.92    3.04
   3  12   2   53.95    2.51
   4  12   2   23.92    2.19
  -4  12  -2   22.69    1.77
   4  12   2   22.37    1.47
  -5 -12  -2   83.74    3.93
   5  12   2   91.59    4.57
  -5  12  -2   86.46    4.26
  -6 -12  -2   18.00    1.68
  -6  12  -2   17.03    1.97
   6  12   2   22.07    2.35
   7  12   2   17.50    2.78
  -7  12  -2   16.23    2.20
   8 -13  -2    1.77    1.27
  -8  13   2    1.66    1.99
   8  13  -2    0.94    1.36
   7 -13  -2    9.07    2.09
  -7  13   2    9.46    1.98
   7  13  -2   10.24    1.47
   6 -13  -2   61.06    2.92
   6  13  -2   53.18    3.06
  -6  13   2   58.52    3.69
   5 -13  -2  115.31    5.14
  -5  13   2  121.07    5.69
   5  13  -2  121.15    5.31
   4 -13  -2    0.87    0.60
   4  13  -2    0.08    0.63
  -4  13   2    0.73    1.01
   3 -13  -2   98.31    4.42
  -3  13   2  105.70    4.74
   3  13  -2  103.39    4.51
  -2 -13   2   81.15    3.58
   2 -13  -2   86.01    3.78
   2  13  -2   85.34    3.79
  -2  13   2   85.42    3.96
   2  13  -2   87.54    3.63
  -1 -13   2    2.02    0.67
   1 -13  -2    2.59    0.63
  -1  13   2    3.20    0.74
   1  13  -2    1.78    0.64
   1  13  -2    2.94    0.64
   0 -13  -2   51.34    2.59
   0  13  -2   55.09    2.57
   0  13  -2   49.25    2.47
   0  13   2   53.70    2.51
   1 -13   2  173.53    7.85
  -1  13  -2  193.60    7.87
  -1  13  -2  181.94    7.81
   1  13   2  206.60    7.83
   1  13   2  195.71    8.07
   2 -13   2   42.46    2.48
   2 -13   2   47.96    2.19
  -2  13  -2   49.32    2.45
   2  13   2   48.66    2.27
   2  13   2   47.79    2.69
   3 -13   2   42.71    2.06
   3  13   2   47.10    2.24
   3  13   2   48.08    2.79
  -3  13  -2   47.39    2.50
   4  13   2   11.10    1.07
  -4  13  -2   12.36    1.68
   4  13   2   12.39    1.67
  -5 -13  -2   22.49    1.66
   5  13   2   19.05    2.12
  -5  13  -2   18.41    1.84
   6  13   2    0.18    1.64
  -6  13  -2   -0.65    1.27
   7  13   2   34.41    3.17
  -7  13  -2   31.05    2.84
   8  14  -2   16.69    2.04
  -8  14   2   15.01    2.50
   7 -14  -2   45.18    2.65
  -7  14   2   45.29    3.56
   7  14  -2   44.54    2.90
   6 -14  -2    1.77    0.90
  -6  14   2    1.56    1.40
   6  14  -2    2.62    1.05
   5 -14  -2  108.46    4.89
  -5  14   2  115.42    5.44
   4 -14  -2  208.33    8.65
   4  14  -2  208.53    8.77
  -4  14   2  211.76    9.05
   3 -14  -2   73.53    3.25
   3  14  -2   65.77    3.28
  -3  14   2   71.58    3.58
   3  14  -2   69.77    2.90
   2 -14  -2  149.45    6.28
   2  14  -2  155.03    6.13
   2  14  -2  144.85    6.29
  -2  14   2  144.69    6.41
   1 -14  -2   63.22    2.98
  -1 -14   2   58.81    2.91
   1  14  -2   64.65    3.00
  -1  14   2   63.83    3.04
   1  14  -2   63.50    3.03
   0 -14  -2    6.55    0.97
   0  14  -2    4.70    0.79
   0  14   2    5.61    0.80
   0  14  -2    7.73    0.95
  -1  14  -2   33.27    1.91
   1  14   2   36.03    1.86
   1  14   2   35.93    2.17
  -1  14  -2   33.23    1.93
   2  14   2   38.31    2.39
  -2  14  -2   36.07    2.11
   2  14   2   36.55    1.91
   3 -14   2   20.70    1.17
   3  14   2   16.94    1.79
   3  14   2   15.35    1.27
  -3  14  -2   17.53    1.59
   4  14   2    0.16    0.67
   4  14   2   -0.05    1.14
  -4  14  -2    0.82    0.93
  -5 -14  -2    7.64    1.09
   5  14   2    8.82    1.76
  -5  14  -2    5.90    1.37
  -6  14  -2    0.99    1.32
   6  14   2   -0.13    1.66
  -8  15   2    3.82    2.11
   8  15  -2    7.57    1.69
   7 -15  -2   21.25    1.96
   7  15  -2   24.07    2.19
  -7  15   2   22.64    2.53
   6 -15  -2   10.60    1.31
  -6  15   2    9.18    1.82
   6  15  -2   11.32    1.52
   5 -15  -2   61.59    3.01
   5  15  -2   61.20    3.20
  -5  15   2   59.02    3.57
   4 -15  -2   22.93    1.62
   4  15  -2   23.55    1.75
  -4  15   2   29.47    2.34
   3 -15  -2  104.85    4.46
   3  15  -2  100.38    4.51
  -3  15   2   99.74    4.74
   3  15  -2   96.97    4.10
   2 -15  -2   14.33    1.27
  -2 -15   2   14.35    1.20
   2  15  -2   16.73    1.23
   2  15  -2   17.83    1.37
  -2  15   2   18.78    1.60
   1 -15  -2    1.54    0.64
  -1  15   2    2.71    0.80
   1  15  -2    2.01    0.74
   1  15  -2    1.72    0.75
   0 -15  -2   11.14    1.24
   0  15  -2   12.82    1.20
   0  15   2   10.98    1.12
   0  15  -2   13.03    1.23
  -1  15  -2   57.93    2.88
   1  15   2   58.74    3.14
   1  15   2   63.08    2.84
  -1  15  -2   59.28    2.93
   2 -15   2  202.14    8.50
  -2  15  -2  202.09    8.74
   2  15   2  209.73    8.57
   2  15   2  223.92    8.99
  -3  15  -2  171.20    7.55
   3  15   2  173.51    7.27
   3  15   2  183.48    7.81
   4  15   2   25.11    2.20
   4  15   2   18.80    1.53
  -4  15  -2   22.40    2.01
  -5 -15  -2   11.04    1.25
   5  15   2   12.07    1.92
  -5  15  -2   10.96    1.64
   6  15   2   30.96    2.83
  -6  15  -2   23.61    2.37
   7 -16  -2    9.24    1.44
   7  16  -2    6.71    1.55
  -7  16   2    5.44    1.87
   6  16  -2   37.38    2.56
  -6  16   2   38.77    3.08
   5 -16  -2    6.62    1.04
   5  16  -2    4.73    1.09
  -5  16   2    8.32    1.61
   4 -16  -2   34.57    2.04
   4  16  -2   32.96    2.15
  -4  16   2   39.58    2.64
   3 -16  -2   50.86    2.57
  -3  16   2   49.71    2.90
   3  16  -2   49.28    2.22
   3  16  -2   49.15    2.64
   2 -16  -2   13.27    1.26
  -2  16   2   14.25    1.49
   2  16  -2   13.47    1.32
   2  16  -2   13.43    1.11
   1 -16  -2   24.20    1.62
  -1  16   2   24.42    1.73
   1  16  -2   21.67    1.66
   1  16  -2   24.13    1.63
   0 -16  -2  145.68    6.28
   0  16  -2  141.29    6.17
   0  16   2  141.78    6.17
   0  16  -2  149.56    6.25
  -1  16  -2  194.37    7.98
  -1  16  -2  188.18    7.88
   1  16   2  184.43    8.14
   1  16   2  190.48    7.86
   2 -16   2   20.61    1.46
   2  16   2   20.49    1.46
   2  16   2   21.68    1.95
  -2  16  -2   22.19    1.77
   3 -16   2   22.19    1.44
   3  16   2   22.24    1.54
  -3  16  -2   20.59    1.93
   3  16   2   27.39    2.22
   4  16   2  198.73    8.40
  -4  16  -2  204.40    8.81
   4  16   2  209.16    8.98
  -5 -16  -2    9.66    1.28
  -5  16  -2    8.51    1.57
   5  16   2   12.27    1.92
  -6  16  -2   10.34    1.81
   6  16   2    8.66    2.08
   7 -17  -2    8.18    1.43
  -7  17   2    9.23    2.01
   7  17  -2    8.48    1.56
   6 -17  -2   19.27    1.71
  -6  17   2   16.83    2.14
   6  17  -2   16.91    1.84
   5 -17  -2   44.17    2.56
  -5  17   2   50.74    3.19
   5  17  -2   48.75    2.82
   4 -17  -2    7.20    1.06
  -4  17   2    5.77    1.53
   4  17  -2    5.61    1.21
   3 -17  -2    4.79    0.92
   3  17  -2    6.30    0.74
   3  17  -2    7.67    1.16
  -3  17   2    6.36    1.22
   2 -17  -2    0.41    0.71
   2  17  -2    0.19    0.75
   2  17  -2    0.79    0.80
  -2  17   2   -0.03    0.87
   1 -17  -2  388.06   15.97
   1  17  -2  401.64   15.86
   1  17  -2  387.40   15.98
  -1  17   2  396.84   15.99
   0 -17  -2   53.74    2.87
   0  17  -2   52.91    2.85
   0  17   2   55.61    2.81
   0  17  -2   56.69    2.84
  -1  17  -2   42.63    2.40
  -1  17  -2   41.36    2.50
   1  17   2   47.31    2.36
   2 -17   2   37.08    2.05
   2  17   2   40.85    2.54
   2  17   2   36.88    2.05
  -2  17  -2   33.46    2.29
   3 -17   2   28.91    1.69
   3  17   2   34.76    2.98
  -3  17  -2   24.70    2.08
   3  17   2   26.29    1.72
   4  17   2    2.70    0.88
  -4  17  -2    3.89    1.21
   4  17   2    3.45    1.49
   5  17   2   54.82    3.57
  -5  17  -2   46.35    3.15
  -6  17  -2   33.36    3.02
   6  17   2   41.06    3.49
   7 -18  -2   17.76    1.86
  -7  18   2   14.84    2.29
   7  18  -2   18.00    2.13
   6 -18  -2   26.50    2.08
  -6  18   2   23.15    2.42
   6  18  -2   27.58    2.34
  -5  18   2    0.83    1.32
   5  18  -2    0.86    1.02
   4 -18  -2    1.98    0.88
   4  18  -2    1.55    1.01
  -4  18   2    1.59    1.16
   3 -18  -2   56.78    2.95
   3  18  -2   56.91    3.08
  -3  18   2   62.75    3.31
   3  18  -2   56.00    2.62
   2 -18  -2  156.85    6.78
   2  18  -2  161.13    6.58
   2  18  -2  154.43    6.85
  -2  18   2  156.67    6.91
   1 -18  -2    1.97    0.78
   1  18  -2    2.57    0.95
  -1  18   2    1.80    0.88
   1  18  -2    1.87    0.93
   0 -18  -2   10.77    1.28
   0  18   2   13.07    1.31
   0  18  -2   11.76    1.35
   0  18  -2   12.55    1.41
  -1 -18  -2   88.45    3.96
   1  18   2   80.44    3.73
  -1  18  -2   73.96    3.78
  -1  18  -2   80.83    3.90
   2 -18   2   21.44    1.63
   2  18   2   20.22    1.59
   2  18   2   24.90    2.08
  -2  18  -2   22.61    1.95
   3 -18   2    9.86    1.11
  -3  18  -2    8.30    1.37
   3  18   2   11.95    1.20
   3  18   2   11.25    1.62
   4  18   2    2.92    0.92
   4  18   2    2.61    1.43
  -4  18  -2    1.91    1.20
  -5  18  -2   35.81    2.84
   5  18   2   38.29    3.20
  -6  18  -2   72.51    4.42
   6  18   2   79.96    4.76
   7 -19  -2   24.50    2.07
  -7  19   2   21.41    2.62
   7  19  -2   18.27    2.21
   6 -19  -2   62.30    3.25
  -6  19   2   53.15    3.85
   6  19  -2   60.13    3.54
   5 -19  -2    7.79    1.23
  -5  19   2    9.85    1.76
   5  19  -2    6.28    1.33
   4 -19  -2    2.08    1.06
   4  19  -2    2.20    1.10
  -4  19   2    4.25    1.31
   3 -19  -2    1.16    0.85
  -3  19   2    0.49    1.07
   2 -19  -2   82.27    4.14
  -2  19   2   90.19    4.32
   2  19  -2   95.61    4.00
   2  19  -2   84.61    4.26
   1 -19  -2    0.78    0.79
  -1  19   2    0.17    0.85
   1  19  -2    1.13    0.98
   1  19  -2    0.67    0.93
   0 -19  -2   35.86    2.31
   0  19   2   37.89    2.30
   0  19  -2   39.06    2.40
   0  19  -2   36.02    2.39
  -1 -19  -2   80.26    3.91
   1  19   2   78.94    3.74
  -1  19  -2   77.39    3.91
   2 -19   2    1.06    0.90
   2  19   2    2.13    0.87
  -2  19  -2    0.26    1.05
   2  19   2    3.19    1.21
   3 -19   2   96.96    4.30
   3  19   2   90.72    4.12
  -3  19  -2   87.09    4.52
   3  19   2   87.16    4.63
   4  19   2    4.89    1.52
   4  19   2    6.22    1.10
  -4  19  -2    3.23    1.37
   5  19   2    5.15    1.86
  -5  19  -2    2.79    1.48
   6 -20  -2    0.73    1.19
   6  20  -2    0.66    1.44
  -6  20   2    2.49    1.67
   5 -20  -2    0.16    1.03
  -5  20   2    1.21    1.41
   5  20  -2    0.31    1.17
   4 -20  -2  271.15   11.18
  -4  20   2  274.77   11.50
   4  20  -2  260.13   11.36
  -3  20   2    7.58    1.42
   3  20  -2    6.64    1.27
   2 -20  -2   18.19    1.70
   2  20  -2   20.34    1.68
   2  20  -2   20.33    1.90
   1 -20  -2   20.31    1.76
   1  20  -2   20.34    1.91
   1  20  -2   21.29    1.75
  -1  20   2   23.10    1.91
   0  20   2   11.47    1.37
   0  20  -2   11.55    1.44
   0  20  -2   10.61    1.40
   1 -20   2   10.92    1.33
  -1 -20  -2    8.67    1.32
   1  20   2   11.00    1.29
  -1  20  -2    8.13    1.37
   2 -20   2    0.41    0.91
  -2  20  -2    1.76    1.18
   2  20   2    0.90    1.15
   2  20   2    0.55    0.85
   3  20   2    1.72    1.27
   3  20   2    1.55    0.96
  -3  20  -2    1.22    1.26
   4  20   2   14.83    2.02
  -4  20  -2   15.66    1.97
   4  20   2   13.12    1.40
  -5  20  -2    5.73    1.79
   5  20   2    6.14    1.88
   6 -21  -2   83.80    4.18
  -6  21   2   82.78    4.80
   6  21  -2   77.29    4.51
   5 -21  -2    3.22    1.22
  -5  21   2    5.34    1.63
   5  21  -2    5.26    1.48
   4 -21  -2    4.56    1.14
  -4  21   2    4.89    1.44
   4  21  -2    4.86    1.36
   3 -21  -2   26.16    2.08
   3  21  -2   28.01    2.26
  -3  21   2   32.04    2.49
   2 -21  -2   49.05    2.94
   2  21  -2   53.14    2.82
   2  21  -2   57.06    3.20
  -2  21   2   59.18    3.20
   1 -21  -2    2.66    0.95
   1  21  -2    3.27    1.13
  -1  21   2    3.79    1.17
   1  21  -2    4.29    1.22
   0 -21  -2    0.98    0.97
   0  21  -2    0.53    1.11
   0  21   2    2.07    1.01
   0  21  -2   -0.48    1.03
   1 -21   2   53.52    2.88
  -1 -21  -2   53.49    2.98
  -1  21  -2   50.20    3.07
   1  21   2   49.16    2.83
   2 -21   2    9.45    1.32
   2  21   2    6.53    1.43
  -2  21  -2    7.01    1.48
   2  21   2    7.95    1.22
   3  21   2  150.47    6.76
   3  21   2  140.54    6.22
  -3  21  -2  142.85    6.71
   4  21   2    0.84    1.47
  -4  21  -2    0.23    1.46
  -5  21  -2    3.50    1.79
   5  21   2    6.90    1.96
   6 -22  -2   25.34    2.19
   6  22  -2   21.19    2.45
  -6  22   2   19.25    2.42
   5 -22  -2   15.40    1.74
  -5  22   2   12.58    1.95
   5  22  -2   18.25    2.12
   4 -22  -2   -0.29    1.00
  -4  22   2   -0.03    1.23
   4  22  -2   -0.13    1.22
   3 -22  -2    0.86    1.03
   3  22  -2    1.40    1.24
  -3  22   2    1.10    1.21
   2 -22  -2   37.36    2.46
   2  22  -2   39.28    2.35
  -2  22   2   38.02    2.64
   2  22  -2   38.10    2.73
   1 -22  -2    0.95    1.00
  -1  22   2    1.97    1.07
   1  22  -2    1.65    1.93
   1  22  -2    0.70    1.08
   0 -22  -2    7.04    1.35
   0  22  -2    6.28    1.40
   0  22  -2    5.12    1.32
   0  22   2    8.53    1.54
  -1 -22  -2  123.20    5.74
   1 -22   2  136.82    5.65
   1  22   2  111.82    5.52
   2 -22   2    9.34    1.38
   2  22   2    5.89    1.18
  -2  22  -2    7.45    1.55
   2  22   2    6.15    1.48
   3  22   2   42.40    3.02
   3  22   2   38.24    2.43
  -3  22  -2   42.87    3.11
   4  22   2    0.85    1.52
  -4  22  -2   -0.54    1.56
   5 -23  -2    2.89    1.34
  -5  23   2    2.35    1.52
   5  23  -2    2.36    1.52
   4 -23  -2   14.38    1.67
   4  23  -2   16.80    2.05
  -4  23   2   14.72    1.93
   3 -23  -2    2.11    1.12
   3  23  -2    1.65    1.38
  -3  23   2    2.07    1.26
   2 -23  -2   21.87    2.04
   2  23  -2   20.61    2.13
  -2  23   2   22.29    2.10
   2  23  -2   23.69    2.06
   1 -23  -2  163.62    7.25
  -1  23   2  158.34    7.23
   1  23  -2  168.16    7.34
   1  23  -2  164.48    7.13
   0 -23  -2   64.48    3.49
   0  23  -2   65.84    3.53
   0  23  -2   58.37    3.49
   0  23   2   62.19    3.42
  -1 -23  -2    6.21    1.28
   1 -23   2   11.56    1.51
  -1  23  -2    6.92    1.54
   1  23   2    8.36    1.78
   2 -23   2    5.58    1.31
  -2  23  -2    3.76    1.53
   3  23   2   32.63    2.84
  -3  23  -2   29.98    2.73
   4  23   2    1.73    1.55
  -4  23  -2    1.32    1.67
   5 -24  -2    0.12    1.32
  -5  24   2    0.23    1.50
   5  24  -2    0.10    1.54
   4 -24  -2    2.89    1.27
   4  24  -2    2.08    1.52
  -4  24   2    3.40    1.54
   3 -24  -2   52.16    3.13
   3  24  -2   52.05    3.45
  -3  24   2   53.68    3.37
   2 -24  -2    2.48    1.17
   2  24  -2    0.21    1.30
  -2  24   2    0.30    1.18
   1 -24  -2   48.78    3.02
   1  24  -2   49.36    3.22
  -1  24   2   53.39    3.08
   1  24  -2   52.31    3.07
   0 -24  -2   40.38    2.69
   0  24  -2   36.70    2.72
   0  24   2   41.42    2.68
   0  24  -2   34.39    2.73
  -1 -24  -2   72.17    3.88
  -1  24  -2   69.33    3.96
   1  24   2   73.62    3.76
  -2 -24  -2    1.95    1.17
   2 -24   2    2.54    1.29
   2  24   2    2.29    1.19
  -2  24  -2    2.33    1.58
   3  24   2    0.60    1.51
   3  24   2    0.19    1.18
  -3  24  -2   -0.52    1.64
   4  24   2   10.79    2.00
  -4  24  -2   13.52    2.32
   5 -25  -2    2.88    1.51
   5  25  -2    1.25    1.73
  -5  25   2    1.22    1.62
   4 -25  -2    4.62    1.41
  -4  25   2    7.35    1.74
   4  25  -2    5.22    1.79
   3 -25  -2   41.16    2.90
   3  25  -2   47.16    3.27
  -3  25   2   49.75    3.22
   2 -25  -2    4.86    1.37
  -2  25   2    5.69    1.48
   2  25  -2    3.99    1.54
   1 -25  -2    6.58    1.35
  -1  25   2    9.73    1.49
   1  25  -2    5.96    1.41
   1  25  -2    5.44    1.55
   0 -25  -2   17.60    1.94
   0  25  -2   16.68    1.95
   0  25  -2   18.35    2.00
   0  25   2   17.59    1.87
  -1 -25  -2    2.87    1.29
   1 -25   2    4.01    1.38
   1  25   2    7.64    1.40
  -1  25  -2    5.39    1.60
   2 -25   2   60.86    3.44
  -2 -25  -2   62.30    3.60
  -2  25  -2   61.95    3.89
   2  25   2   60.47    3.40
  -3  25  -2   32.14    2.93
   3  25   2   28.68    2.71
   4 -26  -2   53.14    3.31
   4  26  -2   45.56    3.63
  -4  26   2   53.87    3.59
   3 -26  -2   51.78    3.28
  -3  26   2   51.41    3.46
   3  26  -2   51.88    3.62
   2 -26  -2   -0.02    1.19
   2  26  -2    0.74    1.45
  -2  26   2   -0.43    1.27
   1 -26  -2    1.14    1.18
   1  26  -2    0.13    1.42
  -1  26   2    0.97    1.28
   1  26  -2    1.67    1.32
   0 -26  -2    3.75    1.45
   0  26  -2    3.87    1.54
   0  26  -2    2.96    1.48
   0  26   2    6.27    1.48
  -1 -26  -2    0.75    1.29
   1 -26   2    0.64    1.34
   1  26   2    1.38    1.25
  -1  26  -2    0.63    1.56
  -2 -26  -2    4.02    1.50
   2 -26   2    5.28    1.79
   2  26   2    3.01    1.40
  -2  26  -2    5.84    1.86
  -3  26  -2   10.07    2.11
   3 -27  -2   11.76    1.82
   3  27  -2   11.70    2.09
  -3  27   2   10.15    1.90
   2 -27  -2   28.18    2.58
  -2  27   2   30.25    2.60
   2  27  -2   32.12    2.94
   1 -27  -2    5.26    1.43
  -1  27   2    7.09    1.58
   1  27  -2    3.45    1.56
   0 -27  -2    3.17    1.48
   0  27   2    4.32    1.44
   0  27  -2    2.45    1.58
   1 -27   2    5.56    1.58
  -1 -27  -2    8.41    1.66
   1  27   2    4.29    1.46
  -1  27  -2    5.98    1.85
  -2 -27  -2   63.41    3.79
   2  27   2   59.95    3.59
  -2  27  -2   64.49    4.19
   2 -28  -2    7.99    1.69
  -2  28   2   10.79    1.82
   2  28  -2    6.79    1.85
   1 -28  -2   21.33    2.20
   1  28  -2   26.75    2.46
  -1  28   2   23.67    2.32
   0 -28  -2    8.16    1.76
   0 -28   2   10.18    1.78
   0  28   2    9.83    1.75
   0  28  -2   11.01    1.93
  -1 -28  -2   17.09    2.08
   1 -28   2   19.06    2.15
   1  28   2   18.03    2.02
  -1  28  -2   19.15    2.38
   1 -29  -2    1.97    1.51
   9   0  -3    6.86    1.44
   8   0  -3    1.50    1.04
   7   0  -3   35.27    2.16
  -7   0   3   39.17    2.43
   6   0  -3    0.32    0.61
  -6   0   3    1.05    0.85
  -5   0   3  178.18    6.97
   5   0  -3  161.59    6.91
   5   0  -3  169.60    7.04
  -4   0   3    0.70    0.38
   4   0  -3   -0.03    0.37
   4   0  -3   -0.06    0.60
  -2   0   3    0.33    0.25
  -2   0   3    0.16    0.33
   2   0  -3   -0.01    0.28
   2   0  -3    0.16    0.25
   0   0  -3    0.13    0.32
   0   0  -3    0.11    0.22
   0   0   3    0.00    0.24
   0   0   3    0.41    0.25
  -2   0  -3    0.08    0.21
  -2   0  -3    0.05    0.35
  -3   0  -3   72.18    3.22
  -4   0  -3    0.42    0.60
  -5   0  -3   61.30    3.09
  -6   0  -3    2.13    1.09
  -7   0  -3    2.29    1.36
   9  -1  -3    8.31    1.53
   9   1  -3    8.64    1.50
   8  -1  -3   59.67    3.35
   8   1  -3   68.00    3.40
   7  -1  -3    4.83    0.95
  -7   1   3    3.82    1.29
   7   1  -3    3.67    1.11
  -6  -1   3  100.96    4.53
   6  -1  -3   95.03    4.36
   6   1  -3   96.53    4.39
  -6   1   3  105.95    4.53
   5  -1  -3   98.81    4.41
   5  -1  -3  102.88    4.46
  -5  -1   3  107.86    4.34
   5   1  -3  106.09    4.68
   5   1  -3  103.22    4.47
  -4  -1   3   14.07    0.82
   4  -1  -3   14.02    0.95
   4  -1  -3   13.08    1.13
  -4   1   3   15.28    0.95
   4   1  -3   13.74    0.96
   4   1  -3   12.94    1.02
   3  -1  -3  599.58   23.31
  -3  -1   3  591.69   23.18
   3   1  -3  595.77   23.31
  -3   1   3  590.15   23.23
   3   1  -3  568.97   23.24
  -2  -1   3   43.75    1.80
   2  -1  -3   41.84    1.87
   2  -1  -3   38.76    1.90
  -2  -1   3   40.94    1.88
  -2   1   3   43.19    1.83
  -2   1   3   39.89    1.87
   2   1  -3   43.51    1.87
   1  -1  -3    2.19    0.34
  -1  -1   3    2.02    0.36
   1  -1  -3    2.46    0.40
  -1  -1   3    2.00    0.31
   1   1  -3    2.25    0.40
  -1   1   3    1.70    0.40
   1   1  -3    1.96    0.32
  -1   1   3    2.26    0.34
   0  -1   3    1.79    0.29
   0  -1   3    1.96    0.34
   0  -1  -3    1.84    0.29
   0  -1  -3    1.66    0.38
   0   1   3    1.62    0.39
   0   1   3    2.15    0.32
   0   1  -3    2.45    0.29
   0   1  -3    2.20    0.38
  -1  -1  -3  423.83   17.25
  -1  -1  -3  435.10   17.20
  -1   1  -3  427.59   17.32
  -1   1  -3  448.23   17.16
   1   1   3  448.80   17.33
  -2  -1  -3   11.49    0.74
  -2  -1  -3   10.60    0.84
  -2  -1  -3   11.55    0.66
  -2   1  -3   11.21    0.85
  -3  -1  -3   95.76    4.10
  -3  -1  -3   94.58    3.88
  -3  -1  -3   93.22    3.86
  -3   1  -3   95.49    4.10
  -4  -1  -3  115.48    5.14
  -4   1  -3  119.17    5.18
   4   1   3  124.19    4.99
  -5  -1  -3    7.95    1.09
  -5   1  -3    8.67    1.22
  -6  -1  -3  100.28    4.72
  -6   1  -3   99.48    4.73
  -7  -1  -3   20.93    2.05
  -7   1  -3   21.81    2.08
   9  -2  -3    1.04    1.32
   9   2  -3    1.15    1.21
   8  -2  -3   38.30    2.41
   8   2  -3   37.89    2.50
   7  -2  -3   65.89    3.29
  -7   2   3   70.97    3.71
  -6  -2   3   85.54    3.66
   6  -2  -3   84.29    3.78
  -6   2   3   85.19    3.98
   6   2  -3   79.44    3.78
   5  -2  -3   65.10    2.91
  -5  -2   3   62.16    2.70
  -5   2   3   62.39    2.97
   5   2  -3   62.06    2.70
   5   2  -3   63.66    2.90
  -4  -2   3   15.26    0.82
   4  -2  -3   16.70    1.03
  -4   2   3   16.67    1.04
   4   2  -3   12.96    0.97
   3  -2  -3  205.66    8.81
   3  -2  -3  219.88    8.79
  -3  -2   3  228.12    8.64
  -3   2   3  223.29    8.74
   3   2  -3  212.53    8.70
   3   2  -3  216.15    8.78
  -2  -2   3   10.68    0.75
   2  -2  -3   10.37    0.79
  -2  -2   3   11.75    0.63
   2  -2  -3   10.15    0.77
   2   2  -3   11.16    0.71
  -2   2   3   10.74    0.77
  -2   2   3   11.75    0.69
   2   2  -3   10.83    0.65
   1  -2  -3    5.49    0.50
  -1  -2   3    6.57    0.52
  -1  -2   3    5.36    0.46
   1  -2  -3    6.34    0.56
   1   2  -3    4.65    0.45
   1   2  -3    6.68    0.53
  -1   2   3    5.73    0.50
  -1   2   3    6.22    0.54
   0  -2  -3   10.68    0.79
   0  -2  -3   12.09    0.68
   0  -2   3   11.77    0.64
   0   2  -3   12.10    0.71
   0   2  -3   12.67    0.62
   0   2  -3   10.98    0.75
  -1  -2  -3  301.31   12.16
  -1  -2  -3  306.04   12.24
  -1   2  -3  307.55   12.26
   1   2   3  314.68   12.27
  -2  -2  -3   14.66    0.96
  -2  -2  -3   14.78    0.97
  -2  -2  -3   14.91    0.85
  -2   2  -3   17.34    1.02
  -3  -2  -3  101.09    4.21
  -3  -2  -3  102.99    4.39
  -3   2  -3  103.67    4.41
  -4  -2  -3  140.21    5.92
  -4   2  -3  137.08    5.94
   4   2   3  140.42    5.83
  -5  -2  -3   45.56    2.49
  -6  -2  -3   56.95    3.04
  -6   2  -3   51.16    3.03
  -7  -2  -3    5.95    1.47
  -7   2  -3    5.24    1.47
   9  -3  -3   -0.35    1.22
   9   3  -3   -0.33    1.14
   8  -3  -3   21.95    1.92
   8   3  -3   24.19    1.96
   7  -3  -3    2.93    0.89
   7   3  -3    2.21    0.95
  -7   3   3    3.05    1.40
   6  -3  -3   20.93    1.44
  -6  -3   3   21.41    1.28
   6   3  -3   20.15    1.51
  -6   3   3   19.43    1.78
  -5  -3   3   77.32    3.18
   5  -3  -3   73.15    3.40
   5   3  -3   77.77    3.44
   5   3  -3   75.66    3.17
  -5   3   3   79.87    3.57
   4  -3  -3  356.52   15.16
  -4  -3   3  377.48   14.88
   4  -3  -3  386.65   15.11
  -4   3   3  395.92   15.13
   4   3  -3  378.27   15.10
   4   3  -3  371.53   14.92
   3  -3  -3   22.38    1.21
   3  -3  -3   20.53    1.39
  -3  -3   3   23.27    1.03
   3   3  -3   23.42    1.14
   3   3  -3   22.33    1.22
  -3   3   3   23.91    1.22
  -2  -3   3    3.10    0.32
   2  -3  -3    2.68    0.49
  -2  -3   3    2.42    0.44
   2  -3  -3    4.09    0.55
  -2   3   3    2.78    0.47
  -2   3   3    3.92    0.45
   2   3  -3    2.87    0.41
   2   3  -3    2.54    0.35
  -1  -3   3   13.14    0.77
   1  -3  -3   13.67    0.78
   1  -3  -3   13.74    0.85
  -1  -3   3   14.90    0.75
  -1   3   3   13.85    0.80
   1   3  -3   13.75    0.78
  -1   3   3   13.69    0.84
   1   3  -3   14.23    0.76
   0  -3  -3   15.32    0.90
   0  -3   3   14.21    0.73
   0  -3  -3   14.06    0.78
   0   3  -3   14.07    0.71
   0   3  -3   13.82    0.80
   0   3  -3   14.40    0.85
   0   3   3   15.93    0.86
   0   3   3   13.43    0.82
  -1  -3  -3    9.33    0.77
  -1  -3  -3    6.64    0.56
   1   3   3    6.19    0.60
  -1   3  -3    7.89    0.68
  -2  -3  -3  348.72   13.69
  -2  -3  -3  333.02   13.73
  -2  -3  -3  353.46   13.79
  -2   3  -3  344.70   13.80
  -3  -3  -3  102.96    4.26
  -3  -3  -3   92.36    4.14
  -3   3  -3  100.50    4.28
  -4  -3  -3   23.63    1.53
  -4   3  -3   24.89    1.61
   4   3   3   22.77    1.62
  -5   3  -3    2.55    0.90
  -6  -3  -3   27.52    2.12
  -6   3  -3   22.58    2.08
  -7  -3  -3    1.55    1.37
  -7   3  -3    1.80    1.30
   9  -4  -3   54.08    3.19
   9   4  -3   44.51    3.02
   8  -4  -3    0.58    1.00
  -8   4   3    0.72    1.68
   8   4  -3    0.39    0.96
   7  -4  -3    2.34    0.89
  -7   4   3    2.89    1.44
   7   4  -3    2.32    0.91
   6  -4  -3   98.02    4.28
   6   4  -3  102.83    4.36
  -6   4   3   86.83    4.56
  -5  -4   3  105.83    4.44
   5  -4  -3  114.82    4.75
   5   4  -3  108.03    4.44
  -5   4   3  114.50    4.93
   5   4  -3  111.83    4.78
  -4  -4   3   75.51    2.98
   4  -4  -3   75.22    3.26
  -4   4   3   73.26    3.32
   4   4  -3   73.84    3.01
   4   4  -3   70.61    3.24
  -3  -4   3   43.68    1.85
   3  -4  -3   47.80    2.25
   3  -4  -3   49.67    2.10
  -3   4   3   48.82    2.27
   3   4  -3   40.80    1.92
   3   4  -3   41.75    2.04
   2  -4  -3   57.67    2.54
  -2  -4   3   55.62    2.48
   2  -4  -3   59.73    2.50
  -2  -4   3   58.04    2.35
   2   4  -3   58.13    2.50
  -2   4   3   56.79    2.48
   2   4  -3   58.09    2.37
  -2   4   3   50.24    2.57
   1  -4  -3   24.31    1.28
   1  -4  -3   26.15    1.22
  -1  -4   3   24.61    1.19
   1   4  -3   24.17    1.14
   1   4  -3   26.11    1.17
  -1   4   3   21.52    1.38
  -1   4   3   25.18    1.26
   1   4  -3   25.40    1.18
   0  -4   3   73.52    3.00
   0  -4  -3   72.92    3.08
   0   4  -3   74.42    2.99
   0   4  -3   75.83    3.09
   0   4   3   72.69    3.12
   0   4   3   73.27    3.11
   0   4  -3   71.11    3.09
  -1  -4  -3  118.96    4.73
  -1  -4  -3  111.26    4.94
  -1   4  -3  114.74    4.77
   1   4   3  115.63    4.78
  -2  -4  -3   98.89    4.10
  -2  -4  -3   96.38    4.15
  -2   4  -3   98.25    4.16
   2   4   3   97.27    4.14
  -3  -4  -3  119.10    4.99
  -3  -4  -3  111.95    4.88
   3   4   3  125.77    5.01
  -3   4  -3  113.90    5.02
  -4  -4  -3   59.74    2.97
  -4   4  -3   67.59    3.08
   4   4   3   63.18    3.09
  -5  -4  -3    2.04    0.82
  -5   4  -3    3.87    0.99
  -6  -4  -3    0.93    1.03
  -6   4  -3   -0.22    1.02
  -7  -4  -3   61.72    3.56
  -7   4  -3   54.58    3.39
   9  -5  -3    2.80    1.35
   9   5  -3    1.65    1.27
   8  -5  -3   63.98    3.30
  -8   5   3   55.13    4.00
   8   5  -3   63.40    3.33
   7  -5  -3  112.58    4.85
   7   5  -3  113.27    4.90
  -7   5   3   93.11    5.24
   6  -5  -3   -0.13    0.60
   6   5  -3    0.42    0.67
  -6   5   3    0.66    1.12
   5  -5  -3  102.15    4.38
  -5   5   3   97.96    4.59
   5   5  -3  102.10    4.41
   4  -5  -3   19.67    1.19
   4   5  -3   20.07    1.24
  -4   5   3   19.78    1.39
   3  -5  -3   65.51    2.86
   3   5  -3   65.22    2.86
  -3   5   3   66.36    2.91
   3   5  -3   63.88    2.67
  -2  -5   3  149.57    6.12
   2  -5  -3  153.53    6.14
   2  -5  -3  149.72    6.19
   2   5  -3  146.66    5.99
  -2   5   3  157.15    6.16
   2   5  -3  145.74    5.98
   1  -5  -3    0.48    0.32
  -1  -5   3    0.11    0.35
   1  -5  -3    0.79    0.40
   1   5  -3    0.83    0.27
   1   5  -3    0.59    0.29
   1   5  -3    0.56    0.24
  -1   5   3    0.35    0.37
  -1   5   3    0.85    0.34
   0  -5  -3  211.74    8.55
   0  -5   3  215.21    8.46
   0   5  -3  217.29    8.46
   0   5   3  217.45    8.59
   0   5   3  212.57    8.58
   0   5  -3  203.83    8.53
  -1  -5  -3   65.96    3.09
  -1  -5  -3   71.72    2.96
   1   5   3   69.48    2.97
  -1   5  -3   67.26    2.96
  -2  -5  -3    6.26    0.70
  -2  -5  -3    3.90    0.75
   2   5   3    5.38    0.65
  -2   5  -3    5.18    0.67
  -3  -5  -3  123.57    5.04
  -3  -5  -3  113.02    4.99
  -3   5  -3  117.26    5.08
   3   5   3  120.99    5.12
  -4  -5  -3    0.73    0.63
  -4   5  -3    1.41    0.72
   4   5   3    1.55    0.95
  -5  -5  -3  155.81    6.38
   5   5   3  127.78    6.48
  -5   5  -3  160.24    6.49
  -6  -5  -3   70.35    3.55
  -6   5  -3   66.70    3.62
  -7  -5  -3    1.10    1.39
  -7   5  -3    0.56    1.31
   9  -6  -3    2.07    1.34
   9   6  -3    0.82    1.33
   8  -6  -3    0.45    1.05
  -8   6   3    1.90    1.81
   8   6  -3    1.04    1.07
   7  -6  -3    9.27    1.26
  -7   6   3    8.44    1.76
   7   6  -3    8.34    1.16
   6  -6  -3    2.72    0.79
  -6   6   3    3.85    1.30
   6   6  -3    3.88    0.85
   5  -6  -3   54.22    2.51
   5   6  -3   50.74    2.53
  -5   6   3   49.00    2.83
   4  -6  -3  139.82    5.77
  -4   6   3  141.21    5.92
   4   6  -3  133.44    5.77
   3  -6  -3    8.73    0.79
   3   6  -3    8.59    0.75
  -3   6   3   10.13    0.91
  -2  -6   3  626.84   24.33
   2  -6  -3  592.21   24.25
   2   6  -3  628.12   24.23
   2   6  -3  613.47   24.10
   2   6  -3  609.30   24.10
  -2   6   3  610.83   24.28
  -1  -6   3  500.29   19.58
   1  -6  -3  507.60   19.65
  -1   6   3  452.65   19.68
   1   6  -3  494.63   19.55
  -1   6   3  505.43   19.65
   1   6  -3  513.87   19.59
   0  -6  -3  636.99   24.60
   0  -6   3  619.62   24.44
   0  -6   3  587.67   24.51
   0   6  -3  639.43   24.63
   0   6  -3  620.44   24.45
   0   6   3  627.00   24.57
  -1  -6  -3    8.43    0.95
  -1  -6  -3    6.30    0.74
  -1   6  -3    5.04    0.60
   1   6   3    6.78    0.64
  -2  -6  -3   78.46    3.73
  -2  -6  -3   80.26    3.66
  -2   6  -3   91.47    3.70
   2   6   3   86.02    3.63
  -3  -6  -3   50.40    2.44
   3   6   3   52.26    2.61
  -3   6  -3   51.73    2.50
  -4  -6  -3    3.43    0.76
  -4   6  -3    3.14    0.81
   4   6   3    3.38    1.12
  -5  -6  -3   20.98    1.60
  -5   6  -3   19.08    1.72
   5   6   3   17.43    1.93
  -6  -6  -3    2.06    1.08
  -6   6  -3    1.76    1.09
  -7  -6  -3    8.17    1.59
  -7   6  -3    7.22    1.60
   9  -7  -3    5.36    1.47
   9   7  -3    8.08    1.60
   8  -7  -3    1.26    1.08
  -8   7   3   -0.13    1.79
   8   7  -3    0.93    1.11
  -7   7   3   27.49    2.58
   7   7  -3   29.35    2.01
   6  -7  -3  186.72    7.55
  -6   7   3  166.38    7.90
   6   7  -3  184.71    7.62
   5  -7  -3    8.40    0.91
   5   7  -3    8.19    0.96
  -5   7   3   11.91    1.42
   4  -7  -3   19.24    1.24
  -4   7   3   18.69    1.52
   4   7  -3   19.12    1.24
   3  -7  -3  271.43   11.08
  -3   7   3  279.33   11.17
   3   7  -3  275.23   11.09
   2  -7  -3  184.84    7.67
  -2   7   3  190.25    7.71
   2   7  -3  189.28    7.65
   2   7  -3  188.51    7.50
   2   7  -3  191.08    7.51
  -1  -7   3   -0.07    0.36
   1  -7  -3    0.98    0.38
  -1   7   3    0.55    0.36
   1   7  -3    0.21    0.28
   1   7  -3    0.21    0.26
   0  -7  -3  303.07   12.03
   0  -7   3  298.32   11.89
   0  -7   3  282.22   12.03
   0   7  -3  306.76   11.99
   0   7   3  315.89   12.04
   0   7  -3  295.94   11.90
  -1  -7  -3  246.86    9.88
   1  -7   3  236.20    9.64
  -1   7  -3  245.23    9.86
   1   7   3  250.07    9.86
  -2  -7  -3   13.38    1.10
  -2   7  -3   14.21    1.03
   2   7   3   13.08    0.99
   3   7   3    2.61    0.91
   3   7   3    1.64    0.57
  -3   7  -3    1.68    0.64
  -4  -7  -3  182.78    7.03
  -4   7  -3  169.04    7.09
   4   7   3  147.49    7.18
  -5  -7  -3   41.71    2.29
   5   7   3   37.70    2.80
  -5   7  -3   36.40    2.37
  -6  -7  -3    4.96    1.21
  -6   7  -3    4.97    1.20
  -7  -7  -3   26.84    2.25
  -7   7  -3   20.31    2.17
   9  -8  -3   24.21    2.14
  -9   8   3   21.08    3.95
   9   8  -3   20.74    2.19
   8  -8  -3   68.24    3.45
  -8   8   3   62.47    4.33
   8   8  -3   65.33    3.54
   7  -8  -3   19.78    1.83
  -7   8   3   13.96    2.13
   7   8  -3   17.39    1.64
   6  -8  -3    0.62    0.70
  -6   8   3    1.63    1.30
   6   8  -3    1.97    0.77
   5  -8  -3    2.60    0.65
  -5   8   3    3.70    1.14
   5   8  -3    2.57    0.69
   4  -8  -3  382.15   15.11
   4   8  -3  388.02   15.15
  -4   8   3  359.32   15.27
   3  -8  -3   87.31    3.85
   3   8  -3   89.73    3.87
  -3   8   3   92.41    4.00
   2  -8  -3    0.58    0.37
  -2   8   3    0.67    0.45
   2   8  -3    1.04    0.27
   2   8  -3    1.59    0.41
   2   8  -3    0.56    0.29
  -1  -8   3   54.35    2.50
  -1  -8   3   53.89    2.44
   1  -8  -3   57.44    2.57
   1   8  -3   57.85    2.45
  -1   8   3   60.85    2.59
   1   8  -3   59.39    2.49
   0  -8  -3    3.99    0.58
   0  -8   3    3.89    0.48
   0   8   3    3.26    0.53
   0   8  -3    3.94    0.45
   0   8  -3    4.99    0.54
  -1  -8  -3   82.62    3.60
   1  -8   3   83.20    3.33
   1   8   3   80.53    3.53
  -1   8  -3   80.06    3.40
  -1   8  -3   84.11    3.55
  -2  -8  -3  422.99   17.61
   2   8   3  459.40   17.54
  -2   8  -3  437.23   17.58
  -3   8  -3    1.65    0.65
   3   8   3    3.07    0.65
   3   8   3    2.67    0.97
  -4  -8  -3   11.34    1.11
   4   8   3    9.33    1.46
  -4   8  -3    9.68    1.12
  -5  -8  -3   19.05    1.60
  -5   8  -3   19.60    1.73
   5   8   3   16.26    2.02
  -6  -8  -3   41.05    2.58
  -6   8  -3   40.27    2.70
  -7  -8  -3   27.61    2.32
  -7   8  -3   22.99    2.34
   8  -9  -3    1.18    1.08
  -8   9   3    0.53    1.90
   8   9  -3    1.27    1.16
   7  -9  -3   11.24    1.25
  -7   9   3   14.15    2.05
   7   9  -3   10.64    1.33
   6  -9  -3   32.08    1.93
  -6   9   3   30.75    2.65
   5  -9  -3  266.08   10.64
  -5   9   3  242.63   10.93
   5   9  -3  270.47   10.71
   4  -9  -3    8.51    0.88
  -4   9   3    9.24    1.20
   3  -9  -3   86.79    3.80
  -3   9   3   89.65    3.95
   3   9  -3   86.71    3.81
   2  -9  -3   66.15    2.98
   2   9  -3   69.62    2.97
   2   9  -3   67.99    2.79
  -2   9   3   68.55    3.07
   2   9  -3   65.03    2.77
  -1  -9   3    3.02    0.56
   1  -9  -3    3.47    0.58
  -1  -9   3    2.97    0.47
  -1   9   3    3.54    0.57
   1   9  -3    3.32    0.44
   1   9  -3    2.79    0.53
   0  -9  -3   71.28    3.02
   0  -9   3   62.33    2.82
   0   9   3   68.53    2.96
   0   9  -3   64.40    2.85
   0   9  -3   68.65    2.90
  -1  -9  -3   51.37    2.47
   1  -9   3   49.69    2.16
   1   9   3   54.22    2.38
  -1   9  -3   52.86    2.39
  -1   9  -3   49.26    2.26
   2   9   3   13.24    1.00
  -2   9  -3    9.06    0.93
   3   9   3  257.93   10.18
  -3   9  -3  256.08   10.28
   3   9   3  235.95   10.40
  -4  -9  -3   30.73    1.87
   4   9   3   33.43    2.43
  -5  -9  -3    4.09    0.95
   5   9   3    4.88    1.59
  -5   9  -3    4.99    1.08
  -6  -9  -3    1.31    1.07
  -6   9  -3    1.04    1.21
   8 -10  -3    1.02    1.12
   8  10  -3    1.54    1.23
  -8  10   3    0.59    1.86
   7 -10  -3   35.97    2.29
   7  10  -3   40.78    2.47
  -7  10   3   36.10    3.20
   6 -10  -3    6.51    0.98
   6  10  -3    3.85    0.92
  -6  10   3    4.19    1.48
   5 -10  -3   47.50    2.40
  -5  10   3   42.99    2.87
   5  10  -3   49.04    2.47
   4 -10  -3   46.85    2.29
   4  10  -3   41.03    2.28
  -4  10   3   52.72    2.67
   3 -10  -3   68.20    3.10
  -3  10   3   67.83    3.28
   3  10  -3   70.38    3.11
   2 -10  -3  100.73    4.28
   2  10  -3   99.74    4.08
  -2  10   3  103.39    4.37
   2  10  -3   95.61    4.23
   1 -10  -3    3.68    0.60
  -1 -10   3    2.80    0.65
  -1 -10   3    3.20    0.53
   1  10  -3    4.47    0.57
   1  10  -3    2.52    0.46
  -1  10   3    3.34    0.60
   0 -10   3  125.66    5.25
   0 -10  -3  127.97    5.43
   0  10  -3  128.83    5.29
   0  10   3  126.95    5.37
   0  10  -3  132.49    5.32
  -1 -10  -3   50.24    2.51
   1 -10   3   49.25    2.21
  -1  10  -3   55.16    2.42
   1  10   3   52.49    2.39
  -1  10  -3   49.39    2.29
  -2 -10  -3  104.94    4.85
  -2  10  -3  113.82    4.79
   2  10   3  112.52    4.71
  -3  10  -3   49.83    2.59
   3  10   3   49.83    2.90
   3  10   3   53.57    2.51
  -4 -10  -3    2.37    0.77
   4  10   3    2.60    1.26
  -4  10  -3    1.35    0.78
  -5 -10  -3   18.86    1.61
   5  10   3   19.19    2.17
  -5  10  -3   17.34    1.66
  -6 -10  -3    2.22    1.12
  -6  10  -3    2.65    1.31
   8 -11  -3    0.57    1.12
   8  11  -3    1.86    1.30
  -8  11   3    1.97    1.96
   7 -11  -3  157.77    6.95
  -7  11   3  159.54    7.62
   7  11  -3  165.55    7.11
   6 -11  -3   52.87    2.81
  -6  11   3   57.73    3.53
   6  11  -3   59.29    3.00
   5 -11  -3    0.45    0.65
   5  11  -3    1.75    0.73
  -5  11   3    1.86    1.15
   4 -11  -3    0.20    0.53
   4  11  -3   -0.17    0.54
  -4  11   3    0.08    0.85
   3 -11  -3   32.10    1.70
  -3  11   3   27.63    1.91
   3  11  -3   32.31    1.71
   2 -11  -3   53.85    2.51
  -2 -11   3   51.00    2.28
   2  11  -3   53.01    2.31
   2  11  -3   54.38    2.48
  -2  11   3   54.91    2.62
  -1 -11   3    2.11    0.54
   1 -11  -3    2.37    0.59
  -1  11   3    2.53    0.62
   1  11  -3    2.22    0.51
   1  11  -3    2.84    0.49
   0 -11  -3   74.46    3.39
   0 -11   3   69.33    3.21
   0  11   3   76.47    3.33
   0  11  -3   77.54    3.27
   0  11  -3   76.74    3.27
   1 -11   3   10.55    0.87
  -1 -11  -3   14.44    1.25
  -1  11  -3   11.25    1.00
   1  11   3   11.47    0.97
  -1  11  -3   11.90    1.02
  -2 -11  -3    0.62    0.73
   2  11   3    2.10    0.62
  -2  11  -3    1.48    0.64
  -3  11  -3    0.81    0.66
   3  11   3    0.19    0.62
   3  11   3    0.40    0.98
  -4 -11  -3   81.25    3.60
   4  11   3   69.57    4.03
  -4  11  -3   79.51    3.75
  -5 -11  -3  195.89    7.98
  -5  11  -3  187.31    8.16
   5  11   3  181.23    8.42
  -6 -11  -3    1.81    1.15
  -6  11  -3    2.40    1.37
   8 -12  -3    2.53    1.23
   8  12  -3    2.98    1.38
  -8  12   3    3.06    2.07
   7 -12  -3    8.02    1.25
   7  12  -3    6.88    1.36
  -7  12   3    7.05    1.92
   6 -12  -3    0.05    0.76
   6  12  -3    0.19    0.86
   5 -12  -3    1.35    0.69
  -5  12   3    1.92    1.15
   5  12  -3    0.32    0.73
   4 -12  -3   94.89    4.42
  -4  12   3  100.05    4.79
   4  12  -3  109.27    4.53
   3 -12  -3    0.72    0.53
  -3  12   3    0.89    0.71
   3  12  -3    1.12    0.57
   2 -12  -3  401.53   16.10
  -2 -12   3  390.11   15.86
   2  12  -3  398.22   15.90
  -2  12   3  398.93   16.19
   2  12  -3  417.36   16.08
  -1 -12   3  115.23    4.91
   1 -12  -3  115.52    5.06
  -1  12   3  118.03    5.07
   1  12  -3  120.93    4.98
   1  12  -3  119.09    4.91
   0 -12  -3  435.81   17.19
   0 -12   3  412.43   16.99
   0  12   3  429.93   17.10
   0  12  -3  431.85   17.05
  -1 -12  -3   21.52    1.52
   1  12   3   17.85    1.25
  -1  12  -3   16.65    1.25
   2 -12   3   56.37    2.40
  -2 -12  -3   50.94    2.82
   2  12   3   60.28    2.66
  -2  12  -3   53.40    2.71
   3  12   3   12.30    1.55
   3  12   3   11.74    1.07
  -3  12  -3   10.27    1.17
   4  12   3    1.34    1.32
   4  12   3    0.67    0.74
  -4  12  -3    0.61    0.88
  -5 -12  -3    0.74    0.94
  -5  12  -3    1.61    1.13
   5  12   3    1.82    1.57
  -6 -12  -3   12.26    1.55
  -6  12  -3   10.69    1.79
   6  12   3   18.85    3.50
   8 -13  -3   18.80    1.84
  -8  13   3   16.08    2.58
   8  13  -3   15.13    1.93
   7 -13  -3   41.01    2.56
  -7  13   3   50.57    3.60
   7  13  -3   40.74    2.78
   6  13  -3   26.90    2.05
  -6  13   3   25.39    2.42
   5 -13  -3   77.18    3.64
  -5  13   3   74.30    4.10
   5  13  -3   85.84    4.62
   4 -13  -3   57.60    2.91
  -4  13   3   59.80    3.32
   4  13  -3   67.01    3.04
   3 -13  -3    2.84    0.69
  -3  13   3    2.41    0.86
   3  13  -3    3.36    0.72
   3  13  -3    3.25    0.52
  -2 -13   3  316.13   13.15
   2 -13  -3  333.59   13.35
   2  13  -3  337.22   13.32
   2  13  -3  331.69   13.15
  -2  13   3  330.38   13.44
   1 -13  -3    6.68    0.83
   1  13  -3    6.21    0.79
   1  13  -3    6.27    0.72
  -1  13   3    7.94    0.94
   0 -13  -3  335.53   13.70
   0  13  -3  339.37   13.56
   0  13   3  337.17   13.60
   0  13  -3  336.77   13.58
   1 -13   3   13.00    1.12
  -1 -13  -3   13.05    1.33
  -1  13  -3   11.56    1.06
   1  13   3   12.47    1.08
  -1  13  -3   12.52    1.11
  -2 -13  -3   57.25    3.05
   2 -13   3   61.80    2.62
  -2  13  -3   59.21    2.95
   2  13   3   60.98    2.84
   3  13   3   43.18    2.15
  -3  13  -3   40.37    2.36
   3  13   3   36.33    2.63
  -4  13  -3   21.36    1.93
   4  13   3   28.35    2.40
   4  13   3   22.18    1.66
  -5 -13  -3   38.81    2.75
  -5  13  -3   39.04    2.70
  -6 -13  -3   27.22    2.40
  -6  13  -3   22.56    2.29
   6  13   3   24.43    2.78
   8 -14  -3   21.74    2.01
   8  14  -3   21.97    2.23
  -8  14   3   19.65    2.78
   7 -14  -3   11.29    1.46
  -7  14   3    9.98    2.07
   7  14  -3   12.32    1.69
   6 -14  -3    8.47    1.18
  -6  14   3    8.60    1.77
   6  14  -3    7.68    1.26
   5 -14  -3   67.62    3.24
   5  14  -3   63.51    3.34
  -5  14   3   70.73    4.13
   4 -14  -3  257.92   10.92
  -4  14   3  270.88   11.25
   4  14  -3  271.20   11.00
   3 -14  -3   18.45    1.37
   3  14  -3   18.55    1.41
   3  14  -3   21.19    1.14
  -3  14   3   17.93    1.65
  -2 -14   3    9.92    0.89
   2 -14  -3    9.82    1.07
   2  14  -3   10.03    0.93
   2  14  -3    8.90    1.00
  -2  14   3   10.31    1.18
   1 -14  -3    0.72    0.62
   1  14  -3   -0.07    0.55
  -1  14   3    0.41    0.61
   1  14  -3    0.33    0.57
   0 -14  -3   16.93    1.42
   0  14  -3   17.67    1.31
   0  14  -3   17.00    1.32
   0  14   3   15.09    1.26
  -1 -14  -3   70.30    3.53
  -1  14  -3   72.10    3.38
   1  14   3   75.98    3.36
  -2 -14  -3  237.76   10.25
   2 -14   3  248.95    9.86
  -2  14  -3  254.05   10.19
   2  14   3  242.15   10.04
   3  14   3   82.61    4.31
   3  14   3   89.70    3.88
  -3  14  -3   83.22    4.34
   4  14   3    1.61    1.37
  -4  14  -3    0.56    1.03
   4  14   3    1.40    0.85
   5  14   3    1.27    1.61
  -5  14  -3    0.61    1.18
   6  14   3   10.70    2.27
  -6  14  -3    7.55    1.75
   8 -15  -3    8.17    1.59
  -8  15   3    5.72    2.22
   8  15  -3    6.85    1.71
   7 -15  -3   21.85    1.97
   7  15  -3   22.26    2.11
  -7  15   3   21.49    2.59
   6 -15  -3   83.18    3.88
  -6  15   3   83.01    4.55
   6  15  -3   73.59    3.95
   5 -15  -3   31.80    2.13
  -5  15   3   38.80    2.80
   5  15  -3   41.21    2.33
   4 -15  -3   87.39    4.07
  -4  15   3   86.90    4.46
   4  15  -3   92.33    4.16
   3 -15  -3  145.15    6.21
   3  15  -3  146.63    6.24
  -3  15   3  141.48    6.41
   3  15  -3  145.82    5.89
   2 -15  -3    9.30    1.04
   2  15  -3    8.90    1.03
   2  15  -3    6.94    0.91
  -2  15   3    8.74    1.18
   1 -15  -3    0.22    0.63
   1  15  -3    1.08    0.67
  -1  15   3    1.10    0.73
   1  15  -3    1.59    0.71
   0 -15  -3   44.07    2.45
   0  15  -3   45.04    2.38
   0  15  -3   46.41    2.32
   0  15   3   43.81    2.33
  -1 -15  -3   72.31    3.64
  -1  15  -3   77.70    3.51
  -1  15  -3   72.49    3.42
   1  15   3   75.47    3.44
  -2 -15  -3   43.50    2.57
   2 -15   3   43.79    2.13
  -2  15  -3   43.20    2.45
   2  15   3   42.33    2.27
   3  15   3   25.70    1.66
  -3  15  -3   17.81    1.71
   4  15   3   96.03    4.31
  -4  15  -3   95.60    4.63
   4  15   3   92.95    4.90
  -5 -15  -3   27.82    2.08
  -5  15  -3   29.33    2.50
   5  15   3   26.11    2.60
  -6  15  -3    2.12    1.59
   6  15   3    1.71    1.99
   7 -16  -3   18.65    1.76
   7  16  -3   15.65    1.91
  -7  16   3   15.35    2.31
   6 -16  -3   38.44    2.49
   6  16  -3   43.28    2.70
  -6  16   3   43.46    3.26
   5 -16  -3   21.27    1.68
   5  16  -3   17.07    1.65
  -5  16   3   19.68    2.06
   4 -16  -3    1.32    0.77
   4  16  -3    0.62    0.90
   3 -16  -3   90.56    4.06
  -3  16   3   86.66    4.26
   3  16  -3   84.71    4.05
   3  16  -3   88.39    3.72
   2 -16  -3    5.77    0.95
   2  16  -3    5.96    1.42
  -2  16   3    6.53    1.11
   2  16  -3    5.28    0.95
   1 -16  -3  102.22    4.67
  -1  16   3   99.80    4.67
   1  16  -3  105.56    4.53
   1  16  -3  105.35    4.63
   0 -16  -3    3.88    0.92
   0  16  -3    5.54    0.95
   0  16  -3    4.36    0.95
   0  16   3    3.79    0.86
  -1 -16  -3   79.78    3.96
  -1  16  -3   90.01    3.78
  -1  16  -3   80.47    3.81
   1  16   3   75.78    3.74
   2 -16   3    0.83    0.74
  -2 -16  -3    0.48    0.91
   2  16   3    0.68    0.71
  -2  16  -3    0.06    0.80
   3  16   3    3.63    2.01
   3  16   3    4.75    0.97
  -3  16  -3    6.06    1.18
   4  16   3   48.20    3.25
  -4  16  -3   44.16    2.88
   4  16   3   45.96    2.53
  -5 -16  -3    0.02    1.03
  -5  16  -3    0.07    1.32
   5  16   3    0.46    1.61
   7 -17  -3   33.89    2.45
  -7  17   3   33.56    3.07
   7  17  -3   34.35    2.76
   6 -17  -3   51.32    2.88
  -6  17   3   49.84    3.54
   6  17  -3   49.75    3.06
   5 -17  -3   13.35    1.43
  -5  17   3   14.67    1.89
   5  17  -3   14.92    1.61
   4 -17  -3    8.07    1.44
   4  17  -3    8.21    1.23
  -4  17   3    7.82    1.41
   3 -17  -3    3.28    0.88
   3  17  -3    1.94    0.85
  -3  17   3    3.72    1.10
   2 -17  -3   23.12    1.73
   2  17  -3   26.19    1.71
  -2  17   3   25.36    1.95
   2  17  -3   24.61    1.77
   1 -17  -3    1.01    0.77
   1  17  -3    0.58    0.84
   1  17  -3    0.62    0.83
  -1  17   3    0.69    0.81
   0 -17  -3    0.80    0.84
   0  17  -3    0.77    0.82
   0  17   3    0.90    0.76
   0  17  -3    2.41    0.93
  -1 -17  -3    4.92    1.10
   1  17   3    6.50    0.99
  -1  17  -3    7.13    1.13
  -1  17  -3    5.42    1.05
  -2 -17  -3   -0.58    0.90
   2 -17   3    0.47    0.79
  -2  17  -3   -0.03    0.93
   2  17   3    0.24    0.73
   3  17   3    9.04    1.65
  -3  17  -3    7.77    1.35
   3  17   3   10.83    1.20
  -4  17  -3   61.43    3.62
   4  17   3   68.28    3.93
  -5 -17  -3    7.92    1.38
   5  17   3    7.01    1.90
  -5  17  -3    5.58    1.60
   7 -18  -3    2.62    1.28
   7  18  -3    2.23    1.46
  -7  18   3    2.53    1.82
   6 -18  -3    6.38    1.26
  -6  18   3    5.40    1.67
   6  18  -3    4.48    1.33
   5 -18  -3   11.12    1.36
  -5  18   3   12.03    1.88
   5  18  -3   11.16    1.47
   4 -18  -3    3.24    0.95
  -4  18   3    3.56    1.26
   4  18  -3    2.13    0.98
   3 -18  -3    4.86    1.13
   3  18  -3    4.39    1.06
  -3  18   3    6.23    1.31
   2 -18  -3   17.58    1.58
   2  18  -3   19.63    1.61
   2  18  -3   17.51    1.64
  -2  18   3   18.16    1.75
   1 -18  -3  336.74   14.06
  -1  18   3  336.85   14.04
   1  18  -3  347.48   13.91
   1  18  -3  349.44   14.03
   0 -18  -3   25.54    1.94
   0  18  -3   21.25    1.85
   0  18   3   27.08    1.81
   0  18  -3   21.96    1.82
  -1 -18  -3   17.65    2.15
  -1  18  -3   12.98    1.34
   1  18   3   11.54    1.30
  -1  18  -3   15.11    1.54
  -2 -18  -3   15.16    1.64
   2 -18   3   16.88    1.51
   2  18   3   16.44    1.46
  -2  18  -3   15.94    1.67
   3  18   3   -0.37    0.86
   3  18   3    0.64    1.33
  -3  18  -3   -0.17    1.07
  -4  18  -3   18.03    2.00
   4  18   3   19.11    1.66
   4  18   3   18.40    2.22
   5  18   3    2.17    1.75
  -5  18  -3    2.26    1.55
   7 -19  -3    2.60    1.39
   7  19  -3    0.70    1.40
  -7  19   3    0.78    1.78
   6 -19  -3   27.66    2.23
   6  19  -3   27.44    2.42
  -6  19   3   29.53    2.79
   5 -19  -3   31.22    2.28
   5  19  -3   37.77    2.52
  -5  19   3   35.10    2.95
   4 -19  -3   46.59    2.73
  -4  19   3   48.19    3.14
   4  19  -3   48.72    2.87
   3 -19  -3  201.80    8.94
   3  19  -3  218.91    9.14
  -3  19   3  215.70    9.17
   2 -19  -3   39.17    2.44
  -2  19   3   35.39    3.46
   2  19  -3   38.09    2.42
   2  19  -3   42.30    2.33
   1 -19  -3    2.82    1.71
   1  19  -3    4.20    1.12
   1  19  -3    5.01    1.14
  -1  19   3    5.10    1.08
   0 -19  -3   19.41    1.85
   0  19   3   19.03    1.67
   0  19  -3   18.54    1.75
   0  19  -3   21.37    1.81
  -1 -19  -3  160.98    6.91
  -1  19  -3  156.17    6.65
   1  19   3  153.44    6.67
  -1  19  -3  149.03    6.77
  -2 -19  -3   45.12    2.85
   2  19   3   46.15    2.59
  -2  19  -3   48.37    2.84
  -3  19  -3   21.77    2.13
   4  19   3    1.40    1.07
   4  19   3    1.35    1.59
  -4  19  -3    1.51    1.39
   5  19   3    3.89    1.90
  -5  19  -3    2.22    1.45
   6 -20  -3    1.07    1.18
   6  20  -3    0.89    1.30
  -6  20   3    0.55    1.59
   5 -20  -3   83.51    4.09
   5  20  -3   75.50    4.22
  -5  20   3   88.14    4.64
   4 -20  -3    3.23    1.09
  -4  20   3    2.04    1.30
   4  20  -3    1.65    1.11
   3 -20  -3   86.34    4.22
  -3  20   3   88.10    4.46
   3  20  -3   89.31    4.35
   2 -20  -3    9.25    1.25
   2  20  -3    8.04    1.23
  -2  20   3    8.69    1.39
   2  20  -3    8.83    1.41
   1 -20  -3   43.46    2.68
   1  20  -3   46.12    2.79
   1  20  -3   47.70    2.72
  -1  20   3   47.85    2.93
   0 -20  -3   22.11    1.99
   0  20   3   22.13    2.24
   0  20  -3   21.85    2.01
   0  20  -3   22.02    1.90
  -1 -20  -3  115.70    5.14
  -1  20  -3  101.28    5.03
   1  20   3  104.03    5.00
  -2 -20  -3    0.08    1.06
  -2  20  -3    1.17    1.19
  -3 -20  -3  108.08    4.93
  -3  20  -3   91.08    4.85
   3  20   3   94.86    4.51
   4  20   3    1.54    1.64
  -4  20  -3   -0.68    1.30
   4  20   3    1.21    1.13
   6 -21  -3   11.51    1.68
   6  21  -3   10.47    1.85
  -6  21   3   12.74    2.14
   5 -21  -3   77.01    3.92
  -5  21   3   75.70    4.34
   5  21  -3   75.81    4.15
   4 -21  -3   96.52    4.65
  -4  21   3   98.42    4.97
   4  21  -3   96.72    4.82
   3 -21  -3   36.37    2.40
   3  21  -3   33.97    2.50
  -3  21   3   37.94    2.70
   2 -21  -3    1.71    0.98
   2  21  -3    2.31    1.14
  -2  21   3    3.41    1.15
   2  21  -3    3.47    1.15
   1 -21  -3    2.95    1.03
  -1  21   3    4.00    1.16
   1  21  -3    3.32    1.24
   1  21  -3    2.27    1.15
   0 -21  -3    0.19    1.04
   0  21  -3    1.86    1.19
   0  21   3    1.37    0.99
   0  21  -3    1.23    1.14
  -1 -21  -3   51.46    3.04
   1  21   3   48.45    2.83
  -1  21  -3   50.30    3.03
  -2 -21  -3   47.29    2.98
  -2  21  -3   45.80    3.05
   2  21   3   46.27    2.71
  -3 -21  -3   55.01    3.31
  -3  21  -3   54.14    3.41
   3  21   3   50.08    2.92
  -4  21  -3    8.49    1.73
   4  21   3   10.60    2.02
   4  21   3   12.10    1.52
   6 -22  -3   53.78    3.48
  -6  22   3   67.45    4.20
   6  22  -3   58.95    3.82
   5 -22  -3   -0.11    1.11
  -5  22   3    0.80    1.43
   5  22  -3    0.78    1.38
   4 -22  -3   10.41    1.48
  -4  22   3    9.44    1.67
   4  22  -3    7.33    1.51
   3 -22  -3    1.31    1.03
  -3  22   3    0.15    1.20
   3  22  -3    0.14    1.16
   2 -22  -3   38.94    2.57
   2  22  -3   40.35    2.74
  -2  22   3   37.97    2.66
   1 -22  -3  102.36    4.99
   1  22  -3  100.86    4.89
  -1  22   3  107.33    5.00
   1  22  -3  106.47    5.08
   0 -22  -3   30.11    2.41
   0  22  -3   32.31    2.46
   0  22  -3   30.37    2.48
   0  22   3   31.24    2.32
   1 -22   3    1.93    1.14
  -1 -22  -3    2.78    1.22
   1  22   3    2.02    1.06
  -1  22  -3    3.67    1.45
  -2 -22  -3   13.41    1.80
  -2  22  -3   10.35    1.76
   2  22   3   12.37    1.49
  -3 -22  -3    0.30    1.22
   3  22   3   -0.52    1.13
  -3  22  -3    0.41    1.52
  -4  22  -3   28.70    2.70
   5 -23  -3   18.94    1.97
   5  23  -3   16.92    2.10
  -5  23   3   21.87    2.43
   4 -23  -3    3.35    1.26
   4  23  -3    3.77    1.47
  -4  23   3    6.37    1.61
   3 -23  -3   21.22    1.97
  -3  23   3   18.85    2.04
   3  23  -3   17.34    1.97
   2 -23  -3    6.02    1.35
   2  23  -3    4.14    1.44
  -2  23   3    5.66    1.38
   1 -23  -3    9.52    1.42
   0 -23  -3    1.36    1.12
   0  23  -3    0.58    1.37
   0  23  -3    0.53    1.30
   0  23   3    1.72    1.09
  -1 -23  -3    1.28    1.21
   1 -23   3    2.41    1.28
   1  23   3    4.52    1.22
  -1  23  -3    2.43    1.43
  -2 -23  -3    4.83    1.47
   2  23   3    6.15    1.32
  -2  23  -3    5.24    1.68
  -3 -23  -3    6.96    1.67
  -3  23  -3    6.56    1.88
   3  23   3    5.39    1.41
   5 -24  -3    2.04    1.44
   5  24  -3    1.58    1.58
  -5  24   3    1.05    1.57
   4 -24  -3    6.03    1.47
  -4  24   3    4.02    1.56
   4  24  -3    3.74    1.60
   3 -24  -3    0.70    1.12
   3  24  -3    0.55    1.37
  -3  24   3    1.09    1.33
   2 -24  -3   19.74    1.98
   2  24  -3   20.23    2.11
  -2  24   3   20.64    2.05
   1 -24  -3   78.10    4.18
   1  24  -3   79.23    4.28
   1  24  -3   80.32    4.19
  -1  24   3   84.98    4.23
   0 -24  -3   33.90    2.48
   0  24   3   33.48    2.49
   0  24  -3   32.21    2.62
   0  24  -3   33.85    2.72
  -1 -24  -3    7.30    1.52
   1 -24   3    6.39    1.40
   1  24   3    5.48    1.37
  -1  24  -3    4.76    1.69
  -2 -24  -3    1.32    1.37
   2  24   3    3.20    1.28
  -2  24  -3    0.03    1.56
  -3 -24  -3    4.41    1.60
  -3  24  -3    5.81    1.92
   3  24   3    5.93    1.48
   4 -25  -3    1.18    1.32
  -4  25   3    2.28    1.48
   4  25  -3    2.07    1.59
   3 -25  -3   93.94    4.72
   3  25  -3   88.71    4.95
  -3  25   3   97.47    4.93
   2 -25  -3   19.10    1.97
   2  25  -3   21.32    2.29
  -2  25   3   25.26    2.29
   1 -25  -3    3.15    1.24
   1  25  -3    5.02    1.67
  -1  25   3    4.87    1.44
   1  25  -3    5.57    1.63
   0 -25  -3    8.59    1.54
   0  25   3   10.98    1.62
   0  25  -3    4.67    1.68
   0  25  -3    7.87    1.62
  -1 -25  -3   58.14    3.59
   1 -25   3   62.16    3.46
  -1  25  -3   57.39    3.80
   1  25   3   55.99    3.34
  -2 -25  -3    3.35    1.54
  -2  25  -3    2.58    1.75
   2  25   3    2.37    1.32
   4 -26  -3   38.14    3.02
  -4  26   3   44.62    3.31
   4  26  -3   40.12    3.31
   3 -26  -3   29.63    2.51
   3  26  -3   23.19    2.46
  -3  26   3   26.42    2.52
   2 -26  -3    0.71    1.28
  -2  26   3    0.56    1.32
   2  26  -3    0.63    1.54
   1 -26  -3   49.18    3.08
  -1  26   3   43.75    3.05
   1  26  -3   41.60    3.21
   0 -26  -3    9.24    1.62
   0  26   3   12.67    1.75
   0  26  -3    9.19    1.73
   0  26  -3   11.37    1.98
  -1 -26  -3    6.34    1.69
   1  26   3   10.21    1.63
  -1  26  -3    6.13    1.91
  -2 -26  -3   66.59    3.93
  -2  26  -3   65.14    4.29
   2  26   3   62.87    3.68
   3 -27  -3    1.66    1.38
   3  27  -3    1.89    1.74
  -3  27   3    2.52    1.57
   2 -27  -3   13.03    1.83
   2  27  -3   13.86    2.13
  -2  27   3   14.90    1.97
   1 -27  -3    0.81    1.29
  -1  27   3    1.85    1.42
   1  27  -3    0.86    1.60
   0 -27  -3   43.23    3.00
   0  27  -3   42.61    3.14
   0  27   3   39.78    2.97
   0  27  -3   43.13    3.40
  -1 -27  -3    3.15    1.60
  -1  27  -3    4.44    1.98
   1  27   3    3.77    1.54
   1 -28  -3    0.15    1.38
   1  28  -3    0.45    1.66
  -1  28   3    0.72    1.48
   0 -28  -3   42.74    3.08
   9   0  -4    0.08    1.27
   8   0  -4  126.49    5.70
   7   0  -4    0.22    0.74
   6   0  -4   69.28    3.30
  -6   0   4   71.14    3.12
   5   0  -4   -0.19    0.49
   5   0  -4   -0.78    0.99
   4   0  -4  103.57    4.56
   4   0  -4  105.72    4.53
  -4   0   4  108.14    4.37
   3   0  -4    0.92    0.39
  -3   0   4    0.03    0.33
   3   0  -4   -0.12    0.48
   2   0  -4  120.68    4.91
   2   0  -4  116.12    4.89
   1   0  -4    0.12    0.29
  -1   0   4    0.19    0.32
  -1   0   4    0.36    0.39
   0   0  -4  210.10    8.09
   0   0   4  204.06    8.18
   0   0   4  192.22    8.09
  -1   0  -4    0.27    0.29
  -1   0  -4    0.04    0.44
  -1   0  -4   -0.17    0.37
  -2   0  -4   58.50    2.71
  -3   0  -4   -0.05    0.54
  -5   0  -4   -0.07    0.89
  -6   0  -4   72.58    3.88
   9  -1  -4   -0.30    1.24
   9   1  -4    1.17    1.29
   8  -1  -4    1.38    0.95
   8   1  -4    0.54    1.02
   7  -1  -4   24.90    1.86
  -7   1   4   28.68    1.84
   7   1  -4   27.44    1.86
   6  -1  -4   22.16    1.47
   6   1  -4   17.84    1.44
  -6   1   4   19.47    1.38
   5  -1  -4    2.36    0.63
  -5  -1   4    3.95    0.53
  -5   1   4    3.50    0.59
   5   1  -4    4.84    0.71
   4  -1  -4    1.69    0.79
  -4  -1   4    1.44    0.38
   4  -1  -4    0.92    0.47
   4   1  -4    2.27    0.71
   4   1  -4    1.06    0.46
  -4   1   4    2.11    0.48
  -3  -1   4  143.70    5.54
   3  -1  -4  131.49    5.64
   3  -1  -4  134.52    5.65
   3   1  -4  137.21    5.65
   3   1  -4  134.19    5.59
   2  -1  -4   85.64    3.80
  -2  -1   4   91.93    3.69
   2  -1  -4   85.90    3.72
  -2   1   4   89.13    3.71
   2   1  -4   87.72    3.71
   2   1  -4   89.67    3.73
   1  -1  -4  563.35   21.81
  -1  -1   4  558.69   21.81
  -1  -1   4  532.70   21.77
  -1   1   4  551.86   21.82
  -1   1   4  538.97   21.80
   1   1  -4  565.18   21.79
   0  -1  -4  144.59    5.54
   0  -1   4  131.91    5.50
   0  -1   4  136.27    5.60
   0   1   4  139.12    5.62
   0   1  -4  135.40    5.49
   0   1   4  130.07    5.54
  -1  -1  -4   40.72    1.72
  -1  -1  -4   37.05    1.81
  -1   1  -4   37.37    1.86
   1   1   4   37.45    1.87
  -1   1  -4   38.73    1.66
  -2  -1  -4   15.69    0.86
  -2  -1  -4   16.56    1.12
  -2  -1  -4   14.40    1.02
  -2   1  -4   17.16    1.13
  -3  -1  -4   25.65    1.53
  -3   1  -4   22.78    1.52
  -4   1  -4  113.37    5.49
  -5  -1  -4   13.43    1.48
  -5   1  -4   11.50    1.37
  -6  -1  -4   66.63    3.66
  -6   1  -4   66.99    3.67
   9  -2  -4   40.90    2.85
   9   2  -4   37.86    2.81
   8  -2  -4    3.02    1.07
   8   2  -4    3.93    1.15
   7  -2  -4   34.12    2.11
   7   2  -4   35.09    2.14
  -7   2   4   35.12    2.17
  -6  -2   4  132.00    5.54
   6  -2  -4  136.53    5.84
   6   2  -4  132.26    5.83
  -6   2   4  143.29    5.78
   4  -2  -4    0.26    0.45
  -4  -2   4    0.52    0.35
   4   2  -4    0.81    0.69
   4   2  -4    0.47    0.43
  -4   2   4    1.35    0.45
  -3  -2   4  457.83   17.66
   3  -2  -4  442.02   17.79
  -3   2   4  448.44   17.72
   3   2  -4  442.13   17.78
   3   2  -4  443.88   17.70
  -2  -2   4   -0.12    0.30
   2  -2  -4    0.06    0.31
  -2   2   4   -0.14    0.31
   2   2  -4   -0.22    0.31
   2   2  -4    0.03    0.40
  -1  -2   4   47.24    1.91
  -1  -2   4   42.86    1.89
   1  -2  -4   35.69    1.95
   1   2  -4   47.68    1.88
  -1   2   4   38.26    1.92
  -1   2   4   37.52    1.91
   0  -2   4    0.82    0.37
   0  -2  -4    1.47    0.35
   0   2   4    1.43    0.43
   0   2  -4    0.45    0.34
   0   2  -4    1.58    0.31
   0   2   4    1.85    0.44
  -1  -2  -4  282.32   11.24
   1   2   4  285.72   11.38
  -1   2  -4  283.04   11.16
  -1   2  -4  279.86   11.38
  -2  -2  -4  297.58   12.40
  -2  -2  -4  314.76   12.32
  -2  -2  -4  321.14   12.54
  -2   2  -4  309.36   12.54
  -3  -2  -4    0.35    0.40
  -3  -2  -4    0.08    0.56
  -3   2  -4    0.72    0.57
  -4  -2  -4   14.56    1.58
  -4   2  -4   12.16    1.25
  -5  -2  -4   11.22    1.37
  -5   2  -4   15.38    1.56
  -6  -2  -4    2.01    1.22
  -6   2  -4    1.79    1.28
   9  -3  -4   23.90    2.08
   9   3  -4   20.27    1.94
   8  -3  -4   24.63    2.01
   8   3  -4   24.72    2.11
   7  -3  -4   61.37    3.08
  -7   3   4   64.77    3.16
   7   3  -4   56.28    3.08
   6  -3  -4   12.40    1.21
  -6   3   4   15.67    1.38
   6   3  -4   12.97    1.24
   5  -3  -4  495.77   20.07
  -5  -3   4  514.51   19.80
  -5   3   4  508.31   20.00
   5   3  -4  489.69   20.06
   4  -3  -4  182.33    7.53
  -4  -3   4  192.62    7.30
   4   3  -4  168.54    7.40
  -4   3   4  184.94    7.45
   4   3  -4  183.46    7.52
   3  -3  -4  163.90    6.62
  -3  -3   4  163.35    6.45
   3   3  -4  159.29    6.59
  -3   3   4  160.97    6.55
   3   3  -4  155.76    6.49
  -2  -3   4    3.66    0.44
   2  -3  -4    3.02    0.50
  -2   3   4    4.49    0.56
   2   3  -4    3.65    0.50
  -1  -3   4   94.64    3.93
   1  -3  -4   93.65    3.96
   1   3  -4   94.86    3.91
  -1   3   4   95.08    3.98
   0  -3   4   29.92    1.41
   0  -3  -4   30.85    1.46
   0   3  -4   31.38    1.52
   0   3   4   30.19    1.55
   0   3  -4   31.65    1.39
  -1  -3  -4  127.49    5.47
  -1  -3  -4  131.30    5.35
   1   3   4  134.83    5.48
  -1   3  -4  131.82    5.47
  -2  -3  -4   36.03    2.06
  -2  -3  -4   43.10    2.06
  -2  -3  -4   42.80    1.86
  -2   3  -4   41.10    2.05
  -3  -3  -4   16.17    1.27
  -3  -3  -4   16.37    1.02
  -3   3  -4   16.13    1.29
  -4  -3  -4   16.30    1.54
  -4   3  -4   15.41    1.44
  -5  -3  -4   18.37    1.66
  -5   3  -4   19.04    1.68
  -6  -3  -4    0.88    1.21
  -6   3  -4    1.01    1.19
   9  -4  -4   14.39    1.71
   9   4  -4   14.31    1.76
   8  -4  -4    6.16    1.24
   8   4  -4    4.82    1.20
   7  -4  -4  139.97    6.17
   7   4  -4  141.07    6.23
  -7   4   4  145.56    6.30
   6  -4  -4   20.20    1.45
   6   4  -4   18.59    1.51
  -6   4   4   23.28    1.67
   5  -4  -4  121.21    5.20
  -5  -4   4  122.22    4.87
  -5   4   4  124.89    5.19
   5   4  -4  115.09    5.17
  -4  -4   4   96.28    3.81
   4  -4  -4   96.10    4.07
   4   4  -4   88.41    3.94
   4   4  -4   92.92    4.05
  -4   4   4   94.60    4.03
  -3  -4   4  276.09   10.66
   3  -4  -4  272.99   10.85
  -3   4   4  261.34   10.79
   3   4  -4  268.63   10.83
   3   4  -4  264.53   10.69
   2  -4  -4  128.22    5.21
  -2  -4   4  126.66    5.10
   2   4  -4  124.00    5.17
   2   4  -4  119.93    5.11
  -2   4   4  128.30    5.20
   1  -4  -4   16.16    0.96
   1   4  -4   16.43    0.91
  -1   4   4   16.51    1.00
   1   4  -4   16.99    0.94
   0  -4   4  273.57   10.27
   0  -4  -4  239.19   10.41
   0   4  -4  277.77   10.40
   0   4  -4  279.38   10.26
   0   4   4  232.45   10.36
   0   4   4  246.89   10.40
  -1  -4  -4   12.81    1.16
  -1  -4  -4   12.57    0.82
   1   4   4   13.11    0.96
  -1   4  -4   11.63    0.93
  -2  -4  -4  148.54    6.62
  -2  -4  -4  161.70    6.49
   2   4   4  165.41    6.64
  -2   4  -4  163.20    6.66
  -3  -4  -4  103.40    4.54
  -3  -4  -4  103.85    4.34
  -3   4  -4  103.23    4.57
  -4  -4  -4    1.15    0.83
  -4   4  -4    1.77    0.79
  -5  -4  -4    6.08    1.13
  -5   4  -4    4.71    1.14
  -6  -4  -4   -0.02    1.16
  -6   4  -4    0.67    1.22
   9  -5  -4    4.20    1.39
   9   5  -4    5.22    1.42
   8  -5  -4   20.82    1.94
  -8   5   4   23.58    2.26
   8   5  -4   22.54    2.03
   7  -5  -4   62.01    3.10
  -7   5   4   58.50    3.36
   7   5  -4   61.44    3.18
   6  -5  -4    5.46    0.92
   6   5  -4    7.11    0.99
  -6   5   4    6.99    1.11
   5  -5  -4   30.25    1.78
  -5  -5   4   32.62    1.38
  -5   5   4   33.25    1.88
   5   5  -4   30.34    1.79
   4  -5  -4    0.58    0.44
  -4  -5   4    0.53    0.29
  -4   5   4    0.27    0.53
   4   5  -4    0.50    0.52
   4   5  -4    0.61    0.44
  -3  -5   4   79.67    3.19
   3  -5  -4   75.63    3.39
   3   5  -4   78.36    3.37
   3   5  -4   75.72    3.23
  -3   5   4   77.41    3.37
   2  -5  -4  203.73    8.26
   2   5  -4  200.29    8.21
   2   5  -4  202.35    8.15
  -2   5   4  209.09    8.26
   2   5  -4  201.54    8.13
   1  -5  -4  236.11    9.33
   1   5  -4  232.37    9.25
   1   5  -4  226.26    9.26
  -1   5   4  230.49    9.35
   0  -5  -4  348.49   14.04
   0  -5   4  349.63   13.93
   0   5  -4  348.20   13.93
   0   5  -4  354.23   14.06
   0   5   4  362.32   14.11
  -1  -5  -4   62.82    3.10
  -1  -5  -4   64.80    2.80
   1   5   4   65.72    2.90
  -1   5  -4   63.99    2.88
  -2  -5  -4   29.95    1.56
  -2  -5  -4   27.08    1.96
  -2   5  -4   31.01    1.69
   2   5   4   32.91    1.70
  -3  -5  -4   30.96    1.78
  -3  -5  -4   29.32    1.66
  -3   5  -4   33.34    1.87
  -4  -5  -4   91.08    4.39
  -4   5  -4   88.40    4.16
  -5  -5  -4    1.94    0.95
  -5   5  -4    0.81    0.99
  -6  -5  -4    7.93    1.49
  -6   5  -4   11.56    1.65
   9  -6  -4   36.53    2.70
   9   6  -4   35.90    2.72
   8  -6  -4   33.28    2.33
   8   6  -4   35.25    2.47
  -8   6   4   36.93    3.02
   7  -6  -4   41.77    2.37
   7   6  -4   39.50    2.43
  -7   6   4   41.43    2.80
   6  -6  -4   28.53    1.85
   6   6  -4   32.36    2.14
  -6   6   4   28.37    2.05
   5  -6  -4   13.43    1.12
  -5   6   4   12.51    1.21
   5   6  -4    7.80    0.96
   4  -6  -4   -0.28    0.44
   4   6  -4    0.25    0.47
  -4   6   4    0.33    0.56
   4   6  -4    0.41    0.23
   4   6  -4    0.90    0.50
   3  -6  -4  115.44    4.42
   3   6  -4   93.30    4.17
   3   6  -4   96.37    4.14
  -3   6   4  111.70    4.40
   3   6  -4   98.88    4.34
   2  -6  -4   54.86    2.48
   2   6  -4   53.49    2.33
  -2   6   4   54.61    2.48
   2   6  -4   54.57    2.37
   2   6  -4   55.63    2.44
   1  -6  -4  240.79   10.13
   1   6  -4  260.76   10.08
   1   6  -4  257.23   10.06
  -1   6   4  247.89   10.16
   0  -6   4   10.17    0.75
   0  -6  -4   10.23    0.81
   0   6  -4   10.71    0.67
   0   6  -4   11.72    0.82
   0   6   4   12.22    0.89
  -1  -6  -4    3.37    0.57
   1   6   4    2.28    0.56
  -2  -6  -4    8.22    0.83
  -2   6  -4    6.15    0.79
   2   6   4    6.90    0.82
  -3  -6  -4    0.47    0.61
  -3  -6  -4    0.72    0.65
  -3   6  -4    1.55    0.65
  -4  -6  -4   81.53    4.26
  -4   6  -4   81.83    3.88
  -5  -6  -4  174.85    7.44
  -5   6  -4  171.38    7.53
  -6  -6  -4   33.62    2.52
  -6   6  -4   33.59    2.64
   9  -7  -4   16.30    1.87
   9   7  -4   14.92    1.89
   8  -7  -4    0.42    0.99
   8   7  -4    1.10    1.10
   7  -7  -4    2.53    0.90
   7   7  -4    1.11    0.89
  -7   7   4    1.65    1.30
   6  -7  -4   13.78    1.29
  -6   7   4   14.11    1.52
   6   7  -4   14.40    1.50
   5  -7  -4    0.14    0.55
  -5   7   4    1.42    0.79
   5   7  -4    0.45    0.60
   4  -7  -4   16.74    1.25
   4   7  -4   20.16    1.27
  -4   7   4   19.31    1.39
   3  -7  -4    6.06    0.70
   3   7  -4    5.88    0.50
  -3   7   4    7.85    0.82
   3   7  -4    8.02    0.77
   3   7  -4    6.60    0.58
   2  -7  -4  286.45   11.24
   2   7  -4  272.65   11.08
   2   7  -4  281.28   11.07
  -2   7   4  277.89   11.23
   2   7  -4  274.70   11.17
   1  -7  -4  129.62    5.38
   1   7  -4  126.70    5.29
  -1   7   4  134.54    5.42
   1   7  -4  126.97    5.30
   0  -7   4   13.79    0.85
   0  -7  -4   12.37    0.92
   0   7   4   14.19    0.98
   0   7  -4   12.55    0.77
   0   7  -4   13.18    0.90
  -1  -7  -4  112.16    4.61
  -1   7  -4  107.36    4.63
   1   7   4  106.74    4.63
  -2  -7  -4    5.34    0.77
   2   7   4    5.97    0.84
  -2   7  -4    5.33    0.79
  -3  -7  -4  152.66    6.38
  -3  -7  -4  150.18    6.33
  -3   7  -4  148.45    6.42
  -4  -7  -4   18.46    1.65
  -4   7  -4   17.51    1.56
  -5  -7  -4    7.98    1.24
  -5   7  -4    7.77    1.29
  -6  -7  -4   66.35    3.57
  -6   7  -4   60.91    3.62
   8  -8  -4    4.68    1.19
  -8   8   4    5.45    1.87
   8   8  -4    4.22    1.24
   7  -8  -4    6.04    1.09
  -7   8   4    5.28    1.54
   7   8  -4    6.17    1.19
   6  -8  -4  119.45    5.22
   6   8  -4  113.27    5.20
  -6   8   4  118.64    5.44
   5  -8  -4   25.83    1.57
   5   8  -4   24.95    1.62
  -5   8   4   22.57    1.79
   4  -8  -4   75.46    3.46
   4   8  -4   71.60    3.45
  -4   8   4   85.23    3.62
   3  -8  -4   58.70    2.80
  -3   8   4   60.89    2.87
   3   8  -4   60.09    2.58
   3   8  -4   62.10    2.55
   3   8  -4   64.96    2.81
   2  -8  -4   97.20    4.28
   2   8  -4   97.66    4.23
   2   8  -4  104.47    4.13
   2   8  -4   98.33    4.13
  -2   8   4  104.08    4.33
   1  -8  -4   15.01    1.01
   1   8  -4   14.75    0.92
   1   8  -4   14.59    1.00
  -1   8   4   13.91    1.02
   0  -8  -4  105.08    4.62
   0  -8   4  108.24    4.47
   0   8   4  110.24    4.65
   0   8  -4  110.86    4.60
   0   8  -4  111.74    4.48
  -1  -8  -4  464.77   18.22
   1   8   4  458.89   18.23
  -1   8  -4  445.92   18.22
  -2  -8  -4   38.52    2.08
  -2   8  -4   41.24    2.11
   2   8   4   41.09    2.08
  -3  -8  -4  158.87    6.67
   3   8   4  156.15    6.62
  -3   8  -4  156.73    6.71
  -4  -8  -4    2.80    1.05
  -4  -8  -4    2.02    1.12
  -4   8  -4    5.04    1.05
  -5  -8  -4   21.93    1.83
  -5   8  -4   18.85    1.79
  -6  -8  -4    1.35    1.23
  -6   8  -4    1.12    1.30
   8  -9  -4   96.23    4.56
   8   9  -4   94.54    4.67
  -8   9   4   91.62    5.19
   7  -9  -4    0.54    0.88
   7   9  -4    0.11    0.91
  -7   9   4   -0.25    1.47
   6  -9  -4   35.15    2.74
  -6   9   4   31.13    2.46
   6   9  -4   33.28    2.08
   5  -9  -4   22.28    1.53
   5   9  -4   25.40    1.60
  -5   9   4   20.68    1.81
   4  -9  -4  450.55   18.28
  -4   9   4  467.54   18.40
   4   9  -4  451.08   18.28
   3  -9  -4   16.55    1.11
  -3   9   4   14.93    1.22
   3   9  -4   15.07    0.89
   3   9  -4   14.92    0.81
   3   9  -4   14.61    1.08
   2  -9  -4    4.96    0.69
   2   9  -4    4.05    0.55
   2   9  -4    4.30    0.50
   2   9  -4    4.07    0.63
  -2   9   4    5.42    0.74
   1  -9  -4   59.54    2.70
   1   9  -4   58.60    2.59
  -1   9   4   57.81    2.71
   1   9  -4   59.36    2.60
   0  -9  -4   16.86    1.15
   0  -9   4   14.31    1.09
   0   9  -4   16.92    1.09
   0   9   4   17.62    1.15
   0   9  -4   16.32    0.95
  -1  -9  -4   21.89    1.36
   1   9   4   19.10    1.25
  -1   9  -4   18.54    1.27
  -1   9  -4   18.40    1.09
  -2  -9  -4  100.37    4.49
   2   9   4  102.60    4.45
  -2   9  -4  103.29    4.50
  -3  -9  -4   52.84    2.67
   3   9   4   46.92    2.53
  -4  -9  -4   11.20    1.44
  -4  -9  -4   10.23    1.26
  -4   9  -4   12.58    1.38
  -5  -9  -4    3.28    1.04
  -5   9  -4    0.07    1.09
  -6  -9  -4   19.42    1.91
  -6   9  -4   18.19    1.97
   8 -10  -4    1.85    1.18
  -8  10   4    1.45    1.84
   8  10  -4    1.39    1.20
   7 -10  -4   20.72    1.75
   7  10  -4   22.44    1.92
  -7  10   4   20.76    2.28
   6 -10  -4  276.96   11.00
   6  10  -4  278.27   11.08
  -6  10   4  241.60   11.24
   5 -10  -4   74.74    3.52
  -5  10   4   74.02    3.76
   5  10  -4   76.71    3.56
   4 -10  -4   74.69    3.33
   4  10  -4   74.06    3.32
  -4  10   4   65.11    3.45
   3 -10  -4    7.98    0.86
  -3  10   4   12.38    1.12
   3  10  -4    8.26    0.64
   3  10  -4    8.24    0.69
   3  10  -4    9.60    0.88
   2 -10  -4   91.06    4.00
   2  10  -4   95.21    3.80
   2  10  -4   91.79    3.93
  -2  10   4   91.93    4.03
   2  10  -4   86.42    3.79
   1 -10  -4   10.90    0.99
   1  10  -4   13.03    0.91
   1  10  -4   14.52    0.92
  -1  10   4   11.02    0.98
   0 -10  -4  206.39    8.50
   0 -10   4  200.78    8.30
   0  10  -4  198.85    8.32
   0  10   4  212.70    8.49
   0  10  -4  215.09    8.43
  -1 -10  -4   71.97    3.41
  -1  10  -4   75.87    3.38
   1  10   4   73.74    3.38
  -1  10  -4   77.01    3.20
  -2 -10  -4    3.35    0.85
  -2  10  -4    3.15    0.79
   2  10   4    2.91    0.72
  -3 -10  -4   92.83    4.46
   3  10   4   95.88    4.33
  -3  10  -4  102.38    4.47
  -4 -10  -4   28.57    1.91
  -4 -10  -4   26.22    2.13
  -4  10  -4   28.08    2.05
  -5 -10  -4   10.48    1.34
  -5  10  -4    8.61    1.42
  -6 -10  -4    2.14    1.29
  -6  10  -4    1.78    1.37
   8 -11  -4   57.60    3.10
   8  11  -4   51.53    3.28
  -8  11   4   47.29    3.90
   7 -11  -4   11.65    1.40
  -7  11   4   11.15    1.97
   7  11  -4   12.33    1.49
   6 -11  -4    1.13    0.77
   6  11  -4    3.32    0.97
  -6  11   4    2.80    1.34
   5 -11  -4    3.33    0.82
  -5  11   4    3.29    1.12
   5  11  -4    1.69    0.75
   4 -11  -4   19.28    1.40
  -4  11   4   20.81    1.70
   4  11  -4   19.34    1.41
   3 -11  -4    6.13    0.83
   3  11  -4    4.72    0.72
   3  11  -4    4.34    0.51
  -3  11   4    4.71    0.87
   2 -11  -4  515.51   20.53
   2  11  -4  496.60   20.30
  -2  11   4  524.81   20.58
   2  11  -4  512.83   20.46
   2  11  -4  521.88   20.33
   1 -11  -4   61.71    2.94
  -1  11   4   64.96    2.96
   1  11  -4   64.86    2.82
   1  11  -4   62.05    2.83
   0 -11  -4   60.05    2.85
   0 -11   4   57.21    2.66
   0  11   4   59.60    2.79
   0  11  -4   60.80    2.67
   0  11  -4   60.77    2.75
  -1 -11  -4   37.71    2.05
  -1  11  -4   38.14    1.98
  -1  11  -4   35.17    1.81
   1  11   4   36.91    1.96
  -2 -11  -4   55.20    2.85
   2  11   4   55.75    2.73
  -2  11  -4   56.08    2.78
  -3 -11  -4   53.32    3.01
  -3  11  -4   56.75    2.92
   3  11   4   57.89    2.81
  -4 -11  -4    4.30    0.97
  -4 -11  -4    2.58    1.19
  -4  11  -4    2.78    1.06
  -5 -11  -4    4.14    1.15
  -5  11  -4    2.58    1.14
  -6 -11  -4    5.74    1.47
  -6  11  -4    5.74    1.56
   8 -12  -4   13.35    1.62
  -8  12   4   10.39    2.31
   8  12  -4   12.65    1.80
   7 -12  -4   57.60    3.08
   7  12  -4   57.65    3.20
  -7  12   4   51.36    3.69
   6 -12  -4    7.76    1.08
   6  12  -4    7.53    1.15
  -6  12   4    7.37    1.58
   5 -12  -4   11.01    1.16
  -5  12   4   10.71    1.51
   4 -12  -4   67.36    3.13
   4  12  -4   65.60    3.13
  -4  12   4   63.52    3.34
   3 -12  -4    1.79    0.64
   3  12  -4    2.25    0.49
  -3  12   4    2.40    0.83
   3  12  -4    3.43    0.73
   2 -12  -4    9.51    0.98
   2  12  -4   10.72    0.86
   2  12  -4   11.96    1.05
  -2  12   4   12.08    1.17
   2  12  -4   11.11    1.00
   1 -12  -4  159.10    6.82
  -1  12   4  158.70    6.80
   1  12  -4  169.43    6.71
   1  12  -4  160.86    6.66
   0 -12  -4  106.74    4.71
   0  12  -4  107.22    4.59
   0  12   4  107.11    4.67
  -1 -12  -4    3.28    0.82
  -1  12  -4    3.95    0.78
  -1  12  -4    4.15    0.73
   1  12   4    3.79    0.74
  -2 -12  -4    3.78    0.99
  -2  12  -4    3.24    0.84
   2  12   4    3.34    0.78
  -3 -12  -4    4.65    1.20
  -3  12  -4    4.09    0.99
   3  12   4    4.98    0.96
  -4 -12  -4    2.63    1.25
  -4 -12  -4    2.50    0.95
  -4  12  -4    1.92    0.95
  -5 -12  -4  147.20    6.41
  -5  12  -4  140.38    6.54
   8 -13  -4   -0.13    1.20
  -8  13   4    2.02    2.00
   8  13  -4   -0.21    1.32
   7 -13  -4    8.61    1.37
  -7  13   4    8.02    1.87
   7  13  -4    7.82    1.34
   6 -13  -4    9.53    1.22
   6  13  -4    7.54    1.19
  -6  13   4    9.00    1.69
   5 -13  -4   12.99    1.42
  -5  13   4   20.03    2.03
   5  13  -4   16.23    1.50
   4 -13  -4   43.98    2.24
  -4  13   4   36.94    2.51
   4  13  -4   41.00    2.25
   3 -13  -4  104.84    4.58
   3  13  -4  107.64    4.56
  -3  13   4   95.04    4.67
   3  13  -4  103.83    4.27
   2 -13  -4   12.49    1.15
   2  13  -4   12.15    0.99
  -2  13   4   12.92    1.24
   2  13  -4   12.25    1.10
   1 -13  -4    3.19    0.74
   1  13  -4    1.88    0.60
   1  13  -4    3.21    0.66
  -1  13   4    2.78    0.70
   0 -13  -4  121.13    5.43
   0  13  -4  124.92    5.28
   0  13  -4  122.89    5.31
   0  13   4  130.82    5.40
  -1 -13  -4   70.08    3.34
  -1  13  -4   68.06    3.20
   1  13   4   68.22    3.18
  -1  13  -4   65.28    3.07
  -2 -13  -4    3.85    1.02
   2  13   4    3.96    0.84
  -2  13  -4    3.57    0.89
  -3 -13  -4   99.58    4.78
  -3  13  -4  100.47    4.62
  -4 -13  -4   36.50    2.67
  -4  13  -4   38.05    2.46
  -5 -13  -4    6.05    1.32
  -5  13  -4    2.25    1.28
   8 -14  -4    2.63    1.36
   8  14  -4    2.09    1.45
  -8  14   4    2.80    2.10
   7 -14  -4   11.72    1.51
  -7  14   4   10.60    1.99
   7  14  -4    9.89    1.56
   6 -14  -4    1.30    0.91
  -6  14   4   -0.03    1.34
   6  14  -4    0.36    0.97
   5 -14  -4   18.10    1.56
  -5  14   4   18.37    1.98
   5  14  -4   19.65    1.69
   4 -14  -4   32.05    1.93
   4  14  -4   32.24    2.00
  -4  14   4   32.53    2.32
   3 -14  -4   13.53    1.28
   3  14  -4   13.23    1.22
  -3  14   4   13.57    1.45
   3  14  -4   14.89    1.12
   2 -14  -4   41.29    2.13
  -2  14   4   34.87    2.15
   2  14  -4   36.97    1.89
   2  14  -4   38.08    2.03
   1 -14  -4   15.06    1.34
   1  14  -4   16.12    1.23
   1  14  -4   13.89    1.17
  -1  14   4   14.70    1.29
   0 -14  -4   70.22    3.42
   0  14  -4   70.39    3.27
   0  14  -4   70.94    3.27
   0  14   4   71.73    3.34
  -1 -14  -4   95.68    4.63
   1  14   4  100.78    4.50
  -1  14  -4  102.76    4.53
  -1  14  -4  105.29    4.41
  -2 -14  -4  162.87    7.48
  -2  14  -4  172.69    8.02
   2  14   4  183.53    7.33
  -3 -14  -4   80.89    4.18
   3  14   4   81.47    3.87
  -3  14  -4   85.50    4.04
  -4  14  -4    0.15    1.03
   4  14   4    0.29    0.92
  -5 -14  -4   14.58    1.64
  -5  14  -4   14.64    1.87
   7 -15  -4   20.45    1.86
  -7  15   4   18.32    2.43
   7  15  -4   20.19    2.02
   6 -15  -4   15.36    1.59
  -6  15   4   16.34    2.08
   6  15  -4   16.70    1.68
   5 -15  -4  111.53    5.02
   5  15  -4  110.52    5.08
  -5  15   4  109.62    5.38
   4 -15  -4  159.25    7.41
  -4  15   4  160.76    8.36
   4  15  -4  170.90    7.12
   3 -15  -4   24.11    1.67
   3  15  -4   22.52    1.63
  -3  15   4   23.74    1.90
   3  15  -4   24.49    1.61
   2 -15  -4    3.73    0.82
  -2  15   4    2.70    0.86
   2  15  -4    3.47    0.80
   2  15  -4    3.33    0.73
   1 -15  -4    5.51    0.93
   1  15  -4    7.33    0.91
  -1  15   4    6.88    1.00
   1  15  -4    6.86    0.99
   0 -15  -4    8.03    1.09
   0  15   4    9.46    1.08
   0  15  -4    6.61    0.98
   0  15  -4    6.51    0.96
  -1 -15  -4  131.30    5.89
   1  15   4  129.00    5.72
  -1  15  -4  136.24    5.77
  -2 -15  -4   59.39    3.26
  -2  15  -4   58.28    3.09
   2  15   4   61.32    2.99
   3  15   4   18.20    1.56
  -3  15  -4   19.35    1.82
  -4 -15  -4    6.15    1.54
  -4  15  -4    7.19    1.44
   4  15   4    8.61    1.28
  -5 -15  -4   12.71    2.11
  -5 -15  -4   19.37    1.83
  -5  15  -4   19.53    2.14
   7 -16  -4   20.87    1.93
   7  16  -4   21.22    2.12
  -7  16   4   19.10    2.50
   6 -16  -4  190.86    8.01
  -6  16   4  181.90    8.42
   6  16  -4  181.65    8.08
   5 -16  -4    4.41    1.02
  -5  16   4    6.34    1.47
   5  16  -4    5.07    1.16
   4 -16  -4    0.56    0.80
  -4  16   4    1.38    1.09
   4  16  -4    0.90    0.83
   3  16  -4  105.20    4.74
   2 -16  -4   83.00    3.99
  -2  16   4   85.21    4.06
   2  16  -4   87.13    3.80
   2  16  -4   85.94    3.93
   1 -16  -4   30.97    2.06
   1  16  -4   36.78    2.05
   1  16  -4   33.94    1.94
  -1  16   4   32.52    2.08
   0 -16  -4    6.57    1.11
   0  16  -4    7.61    1.05
   0  16   4    5.98    0.98
   0  16  -4    5.24    1.02
  -1 -16  -4   50.45    2.76
  -1  16  -4   43.18    2.50
  -1  16  -4   48.21    2.61
   1  16   4   48.53    2.56
   2  16   4   34.06    2.59
  -2  16  -4   38.75    2.37
  -3 -16  -4    2.81    1.36
   3  16   4    1.67    0.93
  -3  16  -4    1.28    1.10
  -4 -16  -4   56.26    3.59
   4  16   4   59.76    3.18
  -4  16  -4   62.18    3.55
  -5 -16  -4    3.29    1.32
  -5 -16  -4    3.30    1.79
  -5  16  -4    2.84    1.52
   7 -17  -4   22.13    2.00
  -7  17   4   18.34    2.44
   7  17  -4   20.77    2.14
   6 -17  -4    9.05    1.38
  -6  17   4    8.47    1.81
   6  17  -4    9.23    1.44
   5 -17  -4   28.96    2.06
  -5  17   4   28.43    2.59
   5  17  -4   29.62    2.16
   4 -17  -4   32.89    2.16
  -4  17   4   33.25    2.51
   4  17  -4   31.04    2.14
   3 -17  -4   60.10    3.15
  -3  17   4   63.71    3.39
   3  17  -4   62.92    3.17
   2 -17  -4   80.49    4.54
   2  17  -4   71.27    3.43
   2  17  -4   73.51    3.56
   1 -17  -4  356.98   14.59
  -1  17   4  334.98   14.09
   1  17  -4  346.62   13.91
   1  17  -4  336.93   13.98
   0  17  -4    1.19    0.96
   0  17   4    1.20    0.78
   0  17  -4    0.38    0.77
  -1 -17  -4    6.34    1.18
  -1  17  -4    5.60    1.11
  -2 -17  -4   15.68    1.81
   2  17   4   15.79    1.50
  -2  17  -4   15.37    1.62
  -3 -17  -4   23.41    2.25
  -3  17  -4   19.71    1.99
   3  17   4   23.30    1.82
  -4 -17  -4   11.61    1.87
   4  17   4   15.15    1.61
  -4  17  -4   15.91    1.93
   7 -18  -4   24.33    2.18
   7  18  -4   24.87    2.38
  -7  18   4   22.74    2.68
   6 -18  -4    0.66    1.05
   6  18  -4    0.48    1.17
  -6  18   4    0.66    1.54
   5 -18  -4    0.57    0.91
   5  18  -4    1.07    1.07
  -5  18   4    0.43    1.30
   4 -18  -4   35.37    2.32
   4  18  -4   38.08    2.39
  -4  18   4   33.58    2.67
   3 -18  -4   84.69    4.04
   3  18  -4   84.65    4.49
  -3  18   4   82.91    4.23
   2 -18  -4    0.80    0.80
  -2  18   4    2.68    1.03
   2  18  -4    1.95    0.98
   2  18  -4    2.33    0.95
   1 -18  -4    1.67    0.88
   1  18  -4    2.47    1.02
   1  18  -4    1.64    0.95
  -1  18   4    3.08    0.96
   0 -18  -4  104.21    4.99
   0  18  -4  110.14    4.89
   0  18  -4  106.99    4.86
   0  18   4  106.19    4.88
  -1 -18  -4   42.80    2.71
  -1  18  -4   47.63    3.51
   1  18   4   44.47    2.54
  -2 -18  -4    0.64    1.19
   2  18   4    1.79    0.94
  -2  18  -4    0.70    1.03
  -3 -18  -4    0.02    1.31
  -3  18  -4    1.07    1.19
   3  18   4    0.58    1.04
  -4 -18  -4   41.62    3.14
  -4  18  -4   40.52    3.00
   4  18   4   39.52    2.61
   7 -19  -4    1.64    1.37
   7  19  -4    2.10    1.49
   6 -19  -4    4.91    1.32
  -6  19   4    3.10    1.67
   6  19  -4    4.00    1.40
   5 -19  -4   69.35    3.59
  -5  19   4   65.20    4.02
   5  19  -4   72.79    3.75
   4 -19  -4   -0.07    0.90
   4  19  -4    1.22    1.04
  -4  19   4    0.25    1.19
   3 -19  -4   40.85    2.58
   3  19  -4   45.47    2.66
  -3  19   4   44.22    2.77
   2 -19  -4   36.21    2.32
   2  19  -4   38.20    2.40
  -2  19   4   34.80    2.45
   2  19  -4   38.09    2.34
   1 -19  -4   14.35    1.58
  -1  19   4   12.47    1.46
   1  19  -4   11.91    1.41
   1  19  -4   10.90    1.40
   0 -19  -4   45.41    2.74
   0  19  -4   43.53    2.67
   0  19   4   48.09    2.65
   0  19  -4   43.31    2.66
  -1 -19  -4    7.75    1.41
  -1  19  -4    8.42    1.38
   1  19   4   10.24    1.30
  -2 -19  -4    1.50    1.27
   2  19   4    2.04    1.04
  -2  19  -4    1.77    1.17
  -3 -19  -4   11.46    1.91
  -3  19  -4    8.12    1.57
   3  19   4   12.81    1.53
  -4 -19  -4   48.21    3.43
  -4  19  -4   50.84    3.39
   4  19   4   45.11    2.89
   6 -20  -4    9.64    1.58
   6  20  -4    7.97    1.69
  -6  20   4    9.58    1.97
   5 -20  -4    2.14    1.13
  -5  20   4    2.15    1.45
   5  20  -4    2.87    1.26
   4 -20  -4   -0.49    0.92
   4  20  -4    0.20    1.07
  -4  20   4    0.05    1.23
   3 -20  -4   14.20    1.57
   3  20  -4   14.84    1.62
  -3  20   4   15.06    1.79
   2 -20  -4   17.29    1.74
   2  20  -4   16.01    1.68
  -2  20   4   18.48    1.87
   2  20  -4   17.44    2.01
   1 -20  -4    1.26    0.98
  -1  20   4    1.93    1.03
   1  20  -4    1.23    1.11
   1  20  -4    1.42    1.12
   0 -20  -4    8.36    1.39
   0  20  -4    9.96    1.50
   0  20  -4   10.54    1.43
   0  20   4   10.30    1.38
  -1 -20  -4   12.28    1.65
  -1  20  -4    9.28    1.50
   1  20   4    8.28    1.29
  -2 -20  -4  224.82    9.54
  -2  20  -4  222.21    9.45
   2  20   4  208.95    9.22
  -3 -20  -4    1.01    1.45
   3  20   4    0.40    1.13
  -3  20  -4    0.35    1.33
  -4 -20  -4   -0.02    1.61
   4  20   4    0.37    1.26
  -4  20  -4    0.47    1.56
   6 -21  -4    1.67    1.35
   6  21  -4    0.89    1.42
  -6  21   4    2.15    1.70
   5 -21  -4   83.20    4.33
  -5  21   4   87.78    4.78
   5  21  -4   87.07    4.51
   4 -21  -4    0.92    1.06
   4  21  -4    0.85    1.14
  -4  21   4    0.49    1.33
   3 -21  -4   43.06    2.72
   3  21  -4   43.62    2.84
  -3  21   4   44.79    2.94
   2 -21  -4    3.16    1.08
   2  21  -4    4.26    1.30
  -2  21   4    3.40    1.20
   1 -21  -4    1.78    1.03
   1  21  -4    1.89    1.23
  -1  21   4    1.75    1.06
   1  21  -4    1.37    1.23
   0 -21  -4   78.35    4.21
   0  21  -4   85.52    4.20
   0  21   4   82.72    4.13
   0  21  -4   86.44    4.20
  -1 -21  -4   28.46    2.32
  -1  21  -4   26.15    2.41
   1  21   4   28.85    2.21
  -2 -21  -4    3.69    1.48
  -2  21  -4    2.49    1.42
   2  21   4    1.69    1.11
  -3 -21  -4    0.73    1.50
   3  21   4   -0.19    1.17
  -3  21  -4    0.53    1.44
   5 -22  -4   31.18    2.52
   5  22  -4   33.33    2.78
  -5  22   4   38.62    3.17
   4 -22  -4    9.00    1.52
   4  22  -4    6.94    1.57
  -4  22   4    9.76    1.78
   3 -22  -4   72.60    3.89
   3  22  -4   72.76    3.97
  -3  22   4   75.18    4.06
   2 -22  -4    8.11    1.43
  -2  22   4   11.75    1.64
   2  22  -4    9.65    1.56
   1 -22  -4    1.71    1.09
   1  22  -4    2.83    1.36
   1  22  -4    3.14    1.37
  -1  22   4    2.10    1.15
   0 -22  -4   27.33    2.30
   0  22  -4   30.28    2.53
   0  22  -4   26.86    2.41
   0  22   4   26.05    2.25
  -1 -22  -4    4.22    1.34
   1  22   4    5.33    1.27
  -1  22  -4    4.78    1.49
  -2 -22  -4    1.04    1.38
  -2  22  -4    0.95    1.43
   2  22   4    1.21    1.17
  -3 -22  -4   30.94    2.73
  -3  22  -4   25.19    2.54
   3  22   4   30.49    2.47
   5 -23  -4   26.24    2.32
  -5  23   4   26.35    2.67
   5  23  -4   25.27    2.52
   4 -23  -4    6.70    1.46
  -4  23   4    6.92    1.70
   4  23  -4    5.64    1.63
   3 -23  -4   13.83    1.73
   3  23  -4   15.44    1.93
  -3  23   4   14.93    1.89
   2 -23  -4   51.76    3.22
   2  23  -4   55.01    3.36
  -2  23   4   59.47    3.39
   1 -23  -4  102.78    5.20
   1  23  -4  106.85    5.17
   1  23  -4  110.55    5.25
  -1  23   4  109.27    5.20
   0 -23  -4   26.23    2.40
   0  23  -4   31.64    2.69
   0  23  -4   30.44    2.55
   0  23   4   30.60    2.44
  -1 -23  -4    6.47    1.52
   1  23   4    4.89    1.34
  -1  23  -4    3.17    1.57
  -2 -23  -4    0.32    1.42
   2  23   4    0.43    1.20
  -2  23  -4    0.18    1.54
   4 -24  -4    5.71    1.49
   4  24  -4    3.95    1.63
  -4  24   4    5.41    1.65
   3 -24  -4   84.10    4.42
  -3  24   4   86.87    4.57
   3  24  -4   81.65    4.49
   2 -24  -4   18.33    1.99
  -2  24   4   18.94    2.11
   2  24  -4   16.75    2.04
   1 -24  -4   44.67    3.05
  -1  24   4   46.67    3.05
   1  24  -4   49.35    3.24
   0 -24  -4    1.80    1.29
   0  24   4    3.96    1.32
   0  24  -4    0.16    1.54
  -1 -24  -4   47.29    3.23
  -1  24  -4   48.56    3.49
   1  24   4   54.86    3.22
  -2 -24  -4    2.42    1.56
  -2  24  -4    1.32    1.70
   2  24   4    2.15    1.37
   4 -25  -4   46.03    3.28
  -4  25   4   52.75    3.51
   4  25  -4   51.36    3.57
   3 -25  -4    1.75    1.30
  -3  25   4    3.11    1.48
   3  25  -4    0.98    1.53
   2 -25  -4   11.94    1.80
   2  25  -4   12.40    1.98
  -2  25   4   15.60    1.93
   1 -25  -4    4.82    1.47
   1  25  -4    6.16    1.70
  -1  25   4    4.67    1.43
   0 -25  -4    1.03    1.28
   0  25   4    1.18    1.34
   0  25  -4    1.26    1.70
  -1 -25  -4   18.14    2.10
   1  25   4   18.99    2.00
  -1  25  -4   17.35    2.27
   3 -26  -4    0.25    1.32
   3  26  -4    0.73    1.66
  -3  26   4   -0.07    1.47
   2 -26  -4    0.74    1.29
  -2  26   4    0.64    1.37
   2  26  -4    0.31    1.62
   1 -26  -4    1.37    1.35
  -1  26   4    2.00    1.42
   1  26  -4    1.61    1.70
   0 -26  -4    1.36    1.37
   0  26  -4    1.72    1.85
   0  26   4    0.55    1.37
   9   0  -5   42.10    2.94
   8   0  -5    0.05    0.95
   7   0  -5   95.14    4.42
  -6   0   5    0.75    0.56
   6   0  -5    0.35    0.63
   5   0  -5   58.69    2.81
  -5   0   5   57.62    2.60
   4   0  -5    0.11    0.46
  -4   0   5    0.33    0.42
   3   0  -5  284.55   11.78
  -3   0   5  299.67   11.71
  -2   0   5    0.39    0.39
   2   0  -5   -0.16    0.36
  -1   0   5  319.99   12.94
   1   0  -5  325.58   12.90
   0   0   5    0.31    0.46
   0   0  -5    0.08    0.36
   0   0   5    0.30    0.49
  -1   0  -5   29.52    1.42
  -1   0  -5   29.69    1.66
  -2   0  -5    0.05    0.58
  -3   0  -5   59.12    2.96
  -4   0  -5    0.37    0.84
  -5   0  -5   91.86    4.49
   9  -1  -5   50.85    3.11
   9   1  -5   47.55    3.12
   8  -1  -5   14.45    1.61
   8   1  -5   15.97    1.59
   7  -1  -5  104.38    4.73
   7   1  -5  101.87    4.72
   6  -1  -5   33.69    2.04
  -6  -1   5   35.91    1.77
  -6   1   5   35.21    1.85
   6   1  -5   38.62    2.10
  -5  -1   5    0.97    0.48
   5  -1  -5    2.33    0.65
  -5   1   5    2.50    0.57
   5   1  -5    1.80    0.64
   4  -1  -5    0.51    0.49
  -4  -1   5    0.45    0.42
  -4   1   5    0.39    0.45
   4   1  -5    0.64    0.53
   3  -1  -5  112.66    4.86
  -3  -1   5  113.59    4.76
  -3   1   5  113.37    4.79
   3   1  -5  119.40    4.87
   2  -1  -5  307.89   12.53
  -2  -1   5  311.75   12.49
   2   1  -5  311.05   12.52
  -2   1   5  318.31   12.52
   1  -1  -5   67.71    2.93
  -1  -1   5   66.56    2.97
   1   1  -5   67.24    2.91
  -1   1   5   67.26    2.98
   0  -1   5   87.23    3.86
   0   1   5   92.39    3.93
   0   1   5   93.98    4.01
   0   1  -5   94.08    3.85
   0   1  -5   95.20    4.00
  -1  -1  -5    7.83    0.87
  -1  -1  -5    8.18    0.76
  -1   1  -5    8.49    0.68
  -1   1  -5    8.81    0.87
  -2  -1  -5    4.71    0.58
  -2  -1  -5    2.65    0.72
  -2   1  -5    3.07    0.72
  -3  -1  -5   13.92    1.30
  -3   1  -5   16.70    1.43
  -4  -1  -5   64.69    3.28
  -4   1  -5   63.43    3.27
  -5  -1  -5    1.54    1.12
  -5   1  -5    1.63    1.14
   9  -2  -5   11.43    1.64
   9   2  -5    7.64    1.55
   8  -2  -5    3.87    1.17
   8   2  -5    2.26    1.10
   7  -2  -5    4.98    0.98
   7   2  -5    4.40    0.97
  -7   2   5    5.64    1.44
   6  -2  -5    0.93    0.68
   6   2  -5    0.99    0.69
  -6   2   5    0.90    0.62
   5  -2  -5  264.09   10.54
   5   2  -5  250.69   10.51
  -5   2   5  255.43   10.36
   4  -2  -5  201.91    8.38
  -4  -2   5  206.34    8.18
  -4   2   5  201.85    8.25
   4   2  -5  202.53    8.32
   4   2  -5  202.69    8.36
   3  -2  -5   11.31    0.98
  -3  -2   5    9.84    0.79
  -3   2   5    9.49    0.81
   3   2  -5    9.64    0.89
   2  -2  -5   88.60    3.50
  -2  -2   5   76.68    3.41
  -2   2   5   87.19    3.49
   2   2  -5   68.59    3.41
   1  -2  -5   21.86    1.23
  -1  -2   5   20.57    1.25
  -1   2   5   22.84    1.27
   1   2  -5   22.38    1.19
   0  -2  -5  258.26   10.05
   0  -2   5  241.01   10.00
   0   2  -5  252.54   10.15
   0   2   5  241.91   10.15
   0   2  -5  257.90   10.00
  -1  -2  -5   10.12    0.83
  -1   2  -5    8.85    0.91
  -1   2  -5   10.08    0.68
   1   2   5   10.70    0.96
  -2  -2  -5    8.27    0.96
  -2  -2  -5   11.12    0.87
  -2   2  -5    9.45    1.00
  -3  -2  -5   46.46    2.49
  -3   2  -5   48.13    2.53
  -4  -2  -5   39.04    2.38
  -4   2  -5   38.18    2.37
  -5  -2  -5    6.10    1.31
  -5   2  -5    6.78    1.35
   9  -3  -5    0.11    1.24
   9   3  -5    0.20    1.29
   8  -3  -5   14.35    1.58
   8   3  -5   14.28    1.57
   7  -3  -5   19.74    1.68
  -7   3   5   18.68    1.49
   7   3  -5   17.55    1.61
   6  -3  -5    0.08    0.67
  -6   3   5    0.41    0.64
   6   3  -5    0.46    0.67
   5  -3  -5   16.20    1.26
  -5  -3   5   16.56    1.00
   5   3  -5   15.30    1.24
  -5   3   5   15.50    1.16
   4  -3  -5   47.52    2.36
  -4  -3   5   51.38    2.17
   4   3  -5   45.73    2.31
  -4   3   5   46.09    2.24
   3  -3  -5    3.61    0.60
  -3  -3   5    3.34    0.52
  -3   3   5    3.88    0.60
   3   3  -5    3.86    0.59
   2  -3  -5  114.18    4.79
  -2  -3   5  111.42    4.71
  -2   3   5  113.79    4.78
   2   3  -5  114.90    4.76
   1  -3  -5    4.36    0.60
   1   3  -5    2.92    0.53
   1   3  -5    4.47    0.56
  -1   3   5    5.09    0.68
   0  -3  -5  164.33    6.63
   0  -3   5  158.82    6.57
   0   3  -5  161.07    6.71
   0   3   5  164.76    6.75
   0   3  -5  163.78    6.55
  -1  -3  -5  200.80    7.76
   1   3   5  186.47    7.87
  -1   3  -5  187.38    7.86
  -1   3  -5  187.57    7.58
  -2  -3  -5  497.50   19.86
  -2  -3  -5  502.50   19.61
  -2   3  -5  487.52   19.85
  -3  -3  -5   28.58    1.79
  -3   3  -5   23.52    1.73
  -4  -3  -5   26.54    1.90
  -4   3  -5   21.04    1.84
  -5  -3  -5    8.17    1.38
  -5   3  -5    6.88    1.34
   9  -4  -5    0.68    1.26
   9   4  -5    1.38    1.31
   8  -4  -5    0.43    0.97
   8   4  -5    0.75    1.05
   7  -4  -5    0.26    0.82
  -7   4   5    1.65    0.92
   7   4  -5    0.13    0.86
   6  -4  -5   87.30    4.02
   6   4  -5   84.05    4.00
  -6   4   5   90.65    3.95
   5  -4  -5  114.98    5.02
  -5  -4   5  116.46    4.69
  -5   4   5  118.27    4.91
   5   4  -5  109.14    4.98
   4  -4  -5    1.16    0.56
  -4  -4   5    2.31    0.45
   4   4  -5    1.87    0.57
  -4   4   5    1.55    0.52
  -3  -4   5  251.94    9.66
   3  -4  -5  241.29    9.81
   3   4  -5  231.01    9.69
  -3   4   5  247.38    9.77
   3   4  -5  232.80    9.77
   2  -4  -5    0.27    0.41
   2   4  -5   -0.04    0.37
  -2   4   5   -0.01    0.42
   1  -4  -5   66.66    3.31
  -1   4   5   68.04    3.36
   1   4  -5   88.32    3.36
   1   4  -5   84.29    3.29
   0  -4   5  308.74   12.08
   0  -4  -5  301.31   12.06
   0   4  -5  297.10   12.12
   0   4  -5  295.83   11.95
   0   4   5  302.69   12.16
  -1  -4  -5   17.39    1.06
  -1   4  -5   17.36    1.21
   1   4   5   15.74    1.22
  -2  -4  -5   48.38    2.40
  -2  -4  -5   45.39    2.13
  -2   4  -5   46.08    2.39
  -3  -4  -5   26.84    1.76
  -3   4  -5   24.61    1.75
  -4  -4  -5   91.48    4.27
  -4   4  -5   87.33    4.26
  -5  -4  -5    7.64    1.37
  -5   4  -5   10.09    1.48
   9  -5  -5    3.58    1.44
   9   5  -5    2.52    1.42
   8  -5  -5    3.08    1.10
   8   5  -5    3.41    1.20
   7  -5  -5   78.26    3.86
  -7   5   5   81.41    3.88
   7   5  -5   80.90    3.91
   6  -5  -5    7.04    1.00
  -6   5   5    6.95    1.02
   6   5  -5    5.25    0.94
  -5  -5   5   53.97    2.37
   5  -5  -5   54.35    2.71
   5   5  -5   54.90    2.68
  -5   5   5   55.06    2.64
  -4  -5   5   81.31    3.36
   4  -5  -5   79.69    3.62
   4   5  -5   83.01    3.62
  -4   5   5   79.04    3.57
   3  -5  -5  210.21    8.32
  -3   5   5  208.47    8.27
   3   5  -5  195.26    8.16
   3   5  -5  194.23    8.24
   2  -5  -5  150.92    6.25
  -2   5   5  154.04    6.25
   2   5  -5  150.15    6.14
   2   5  -5  145.93    6.17
   1  -5  -5  115.62    4.85
   1   5  -5  114.60    4.77
   1   5  -5  116.37    4.83
  -1   5   5  115.28    4.90
   0  -5  -5   60.88    2.68
   0   5  -5   60.30    2.55
   0   5  -5   59.74    2.73
   0   5   5   57.70    2.77
  -1  -5  -5    1.19    0.47
   1   5   5    0.09    0.57
  -1   5  -5    0.79    0.55
  -2  -5  -5   11.20    0.95
  -2   5  -5   11.18    1.13
   2   5   5   11.27    1.11
  -3  -5  -5    6.79    1.02
  -3   5  -5    5.45    0.99
  -4  -5  -5   53.69    2.93
  -4   5  -5   56.16    3.01
  -5  -5  -5   48.58    2.95
  -5   5  -5   48.81    3.01
   8  -6  -5  101.09    4.72
   8   6  -5   96.86    4.79
   7  -6  -5   37.88    2.33
   7   6  -5   36.27    2.42
  -7   6   5   42.19    2.51
   6  -6  -5    4.28    0.89
  -6   6   5    4.60    0.98
   6   6  -5    4.67    0.92
   5  -6  -5   12.79    1.22
  -5   6   5   12.47    1.17
   5   6  -5   12.81    1.20
   4  -6  -5   14.21    1.09
   4   6  -5   12.09    1.09
  -4   6   5   11.98    1.05
   4   6  -5   11.69    0.77
   3  -6  -5   18.32    1.22
   3   6  -5   17.13    1.20
   3   6  -5   19.35    1.20
  -3   6   5   18.20    1.21
   2  -6  -5  318.24   12.89
   2   6  -5  318.16   12.82
   2   6  -5  325.42   12.77
  -2   6   5  317.86   12.88
   1  -6  -5   85.60    3.79
   1   6  -5   87.78    3.69
   1   6  -5   86.89    3.75
  -1   6   5   90.22    3.84
   0   6  -5   23.62    1.20
   0   6  -5   25.09    1.41
  -1  -6  -5    0.92    0.52
  -1   6  -5    0.59    0.55
   1   6   5    0.51    0.56
  -2  -6  -5    2.16    0.62
   2   6   5    2.09    0.72
  -2   6  -5    3.19    0.76
  -3  -6  -5   49.73    2.62
  -3   6  -5   49.07    2.66
  -4  -6  -5   47.90    2.72
  -4   6  -5   50.95    2.83
  -5  -6  -5   22.70    1.98
  -5   6  -5   19.33    1.87
   8  -7  -5   13.88    1.58
  -8   7   5   18.51    2.02
   8   7  -5   15.31    1.69
   7  -7  -5    3.14    0.97
  -7   7   5    2.49    1.20
   7   7  -5    3.02    1.03
   6  -7  -5  109.16    4.97
   6   7  -5  114.34    5.02
  -6   7   5  110.76    5.03
   5  -7  -5    6.05    0.89
   5   7  -5    7.04    0.97
  -5   7   5    7.11    0.99
   4  -7  -5   71.48    3.38
   4   7  -5   75.69    3.37
  -4   7   5   75.60    3.37
   4   7  -5   72.56    3.05
   3  -7  -5    0.70    0.49
   3   7  -5    0.84    0.42
   3   7  -5    0.75    0.49
  -3   7   5    0.62    0.52
   2  -7  -5   64.65    2.94
  -2   7   5   65.39    2.96
   2   7  -5   64.95    2.87
   2   7  -5   62.99    2.80
   1  -7  -5  205.20    8.47
  -1   7   5  212.10    8.52
   1   7  -5  204.77    8.37
   1   7  -5  207.81    8.42
   0  -7  -5    6.25    0.74
   0   7  -5    7.99    0.64
   0   7   5    5.99    0.77
   0   7  -5    7.23    0.79
  -1  -7  -5   54.05    2.40
  -1   7  -5   46.88    2.44
   1   7   5   49.78    2.48
  -2  -7  -5    2.91    0.70
   2   7   5    2.37    0.75
  -2   7  -5    3.79    0.81
  -3  -7  -5   38.83    2.02
  -3  -7  -5   39.23    2.18
  -3   7  -5   28.39    2.10
  -4  -7  -5    1.29    0.98
  -4   7  -5    1.82    1.00
  -5  -7  -5    4.82    1.26
  -5   7  -5    3.30    1.31
   8  -8  -5   30.63    2.29
   8   8  -5   31.87    2.42
  -8   8   5   31.58    2.84
   7  -8  -5    1.31    0.92
   7   8  -5    0.80    0.96
  -7   8   5    0.88    1.17
   6  -8  -5  125.13    5.44
   6   8  -5  117.31    5.43
  -6   8   5  124.08    5.52
   5  -8  -5   37.09    2.15
  -5   8   5   41.04    2.27
   5   8  -5   39.40    2.18
   4  -8  -5  344.70   13.98
   4   8  -5  338.08   13.64
   4   8  -5  348.71   13.95
  -4   8   5  350.03   13.98
   3  -8  -5  104.77    4.51
  -3   8   5   98.75    4.47
   3   8  -5  101.62    4.25
   3   8  -5  107.83    4.45
   2  -8  -5    0.40    0.46
  -2   8   5    1.06    0.53
   2   8  -5    0.37    0.46
   2   8  -5    0.49    0.40
   1  -8  -5   46.11    2.36
   1   8  -5   54.79    2.33
  -1   8   5   47.03    2.41
   1   8  -5   51.31    2.27
   0  -8  -5    9.76    0.93
   0   8  -5    7.75    0.68
   0   8  -5   10.20    0.92
   0   8   5    7.26    0.88
  -1  -8  -5   48.77    2.44
  -1   8  -5   53.03    2.54
   1   8   5   52.67    2.57
  -2  -8  -5    3.78    0.80
   2   8   5    3.72    0.93
  -3  -8  -5   77.17    3.65
  -3  -8  -5   74.74    3.49
  -3   8  -5   75.56    3.68
  -4  -8  -5    0.84    0.94
  -4   8  -5    1.02    0.98
  -5  -8  -5    0.50    1.14
  -5   8  -5    1.02    1.21
   8  -9  -5    1.48    1.15
   8   9  -5    2.81    1.23
  -8   9   5    1.09    1.55
   7  -9  -5   42.05    2.52
   7   9  -5   40.81    2.57
  -7   9   5   42.92    2.90
   6  -9  -5   24.05    1.89
   6   9  -5   36.23    2.07
  -6   9   5   29.09    2.19
   5   9  -5   23.95    1.80
  -5   9   5   25.52    1.83
   4  -9  -5   11.57    1.07
   4   9  -5   12.64    1.14
  -4   9   5   13.98    1.25
   4   9  -5   10.24    0.75
   3  -9  -5    0.28    0.51
   3   9  -5    0.41    0.39
  -3   9   5    1.14    0.60
   3   9  -5    0.27    0.51
   2  -9  -5   33.97    1.77
   2   9  -5   31.83    1.59
  -2   9   5   31.65    1.78
   2   9  -5   30.37    1.65
   1  -9  -5    7.81    0.86
  -1   9   5    8.15    0.90
   1   9  -5    6.98    0.74
   1   9  -5    7.34    0.79
   0  -9  -5    4.00    0.73
   0   9  -5    4.19    0.70
   0   9  -5    3.81    0.54
   0   9   5    2.88    0.68
  -1  -9  -5  452.96   18.12
  -1   9  -5  455.59   18.16
   1   9   5  450.00   18.17
  -2  -9  -5   15.41    1.33
  -2   9  -5   13.52    1.43
  -3  -9  -5   60.92    3.08
  -3   9  -5   63.91    3.21
  -4  -9  -5    0.78    0.94
  -4   9  -5    2.62    1.12
  -5  -9  -5   50.22    3.12
  -5   9  -5   50.82    3.18
   8 -10  -5    0.84    1.10
  -8  10   5    1.29    1.65
   8  10  -5    1.59    1.21
   7 -10  -5    9.85    1.30
  -7  10   5   13.21    1.79
   7  10  -5    8.59    1.31
   6 -10  -5   44.31    2.50
  -6  10   5   44.38    3.05
   6  10  -5   45.51    2.59
   5 -10  -5    9.37    1.10
   5  10  -5    9.87    1.35
  -5  10   5   12.48    1.37
   4 -10  -5   82.86    3.88
   4  10  -5   88.81    3.88
  -4  10   5   84.24    3.96
   3 -10  -5  112.80    4.91
   3  10  -5  112.08    4.87
   3  10  -5  113.27    4.65
  -3  10   5  113.95    4.95
   2 -10  -5   18.13    1.28
  -2  10   5   19.14    1.32
   2  10  -5   17.17    1.19
   2  10  -5   16.49    1.10
   1 -10  -5  137.08    5.73
  -1  10   5  139.18    5.77
   1  10  -5  131.98    5.63
   1  10  -5  132.52    5.59
   0 -10  -5   30.69    1.80
   0  10   5   33.51    1.85
   0  10  -5   33.91    1.80
   0  10  -5   32.09    1.60
  -1 -10  -5   56.30    2.82
  -1  10  -5   59.96    2.84
   1  10   5   58.52    2.85
  -2 -10  -5   15.83    1.41
   2  10   5   14.22    1.31
  -2  10  -5   18.34    1.48
  -3 -10  -5  216.67    8.79
   3  10   5  211.54    8.79
  -3  10  -5  199.41    8.83
  -4 -10  -5   22.89    1.91
  -4  10  -5   21.68    1.95
  -5 -10  -5    2.14    1.18
  -5  10  -5    0.99    1.28
   8 -11  -5    5.75    1.36
   8  11  -5    3.36    1.33
  -8  11   5    2.71    1.76
   7 -11  -5    4.59    1.13
   7  11  -5    3.41    1.17
  -7  11   5    3.69    1.56
   6 -11  -5   72.39    3.56
  -6  11   5   74.92    3.91
   6  11  -5   72.53    3.65
   5 -11  -5   82.16    3.88
   5  11  -5   85.61    3.90
  -5  11   5   79.41    4.02
   4 -11  -5   17.10    1.43
  -4  11   5   16.46    1.52
   4  11  -5   12.26    1.26
   3 -11  -5   20.32    1.45
   3  11  -5   22.95    1.22
   3  11  -5   21.94    1.46
  -3  11   5   22.24    1.56
   2 -11  -5   40.68    2.07
   2  11  -5   38.00    1.85
  -2  11   5   36.67    2.06
   2  11  -5   36.47    1.94
   1 -11  -5  310.73   12.52
  -1  11   5  306.80   12.53
   1  11  -5  308.60   12.39
   1  11  -5  305.09   12.36
   0 -11  -5    0.41    0.63
   0  11   5    0.48    0.60
   0  11  -5    0.81    0.60
   0  11  -5    0.60    0.57
  -1 -11  -5   25.52    1.64
  -1  11  -5   19.49    1.54
   1  11   5   23.24    1.59
  -2 -11  -5    1.60    0.86
  -2  11  -5    1.59    0.81
   2  11   5    0.92    0.75
  -3 -11  -5   12.88    1.42
  -3  11  -5   11.53    1.36
   3  11   5   11.54    1.29
  -4 -11  -5   -0.02    0.96
  -4  11  -5    0.03    1.07
  -5 -11  -5   67.57    3.71
  -5  11  -5   69.83    3.90
   8 -12  -5   87.88    4.41
   8  12  -5   92.23    4.54
  -8  12   5   79.15    4.94
   7 -12  -5    0.61    1.00
   7  12  -5    0.16    0.98
  -7  12   5    0.86    1.49
   6 -12  -5    0.18    0.78
   6  12  -5    0.41    0.91
  -6  12   5    0.40    1.22
   5 -12  -5    1.86    0.82
  -5  12   5    1.78    1.21
   5  12  -5    1.57    0.84
   4 -12  -5    5.59    1.15
   4  12  -5    4.30    0.91
  -4  12   5    4.78    1.00
   3 -12  -5  105.48    4.72
   3  12  -5  108.06    4.44
  -3  12   5  105.27    4.78
   3  12  -5  106.78    4.66
   2 -12  -5  210.25    8.68
  -2  12   5  206.26    8.69
   2  12  -5  203.81    8.56
   2  12  -5  213.71    8.47
   1 -12  -5    0.55    0.63
  -1  12   5    1.64    0.69
   1  12  -5    1.30    0.60
   0 -12  -5   23.47    1.57
   0  12  -5   22.35    1.38
   0  12  -5   21.39    1.47
   0  12   5   22.46    1.54
  -1 -12  -5   10.33    1.19
  -1  12  -5    8.31    1.05
  -2 -12  -5   12.56    1.44
   2  12   5   15.22    1.40
  -2  12  -5   11.77    1.30
  -3 -12  -5   11.08    1.47
   3  12   5   11.37    1.35
  -3  12  -5   12.15    1.49
  -4 -12  -5   46.71    2.79
  -4  12  -5   48.47    2.98
  -5 -12  -5   11.51    1.62
  -5  12  -5   13.36    1.70
   8 -13  -5    5.77    1.44
  -8  13   5    8.13    2.10
   8  13  -5    4.77    1.52
   7 -13  -5   47.27    2.79
   7  13  -5   47.94    2.89
  -7  13   5   41.87    3.36
   6 -13  -5   45.24    2.68
  -6  13   5   47.35    3.18
   6  13  -5   51.00    2.78
   5 -13  -5    1.84    0.81
   5  13  -5    0.98    0.81
  -5  13   5    1.37    1.07
   4 -13  -5  115.40    5.27
   4  13  -5  123.26    5.27
   3 -13  -5   37.58    2.16
   3  13  -5   35.20    2.02
  -3  13   5   39.05    2.24
   3  13  -5   39.43    2.10
   2 -13  -5    2.35    0.75
   2  13  -5    1.73    0.66
   2  13  -5    1.70    0.61
  -2  13   5    1.95    0.74
   1 -13  -5   12.80    1.26
   1  13  -5    9.23    0.97
   1  13  -5   10.18    1.01
  -1  13   5   12.70    1.23
   0 -13  -5  109.80    4.79
   0  13   5  107.44    4.77
   0  13  -5  106.06    4.57
   0  13  -5  103.16    4.66
  -1 -13  -5   33.46    2.13
   1  13   5   35.41    2.05
  -1  13  -5   32.68    2.04
  -2 -13  -5   30.45    2.18
   2  13   5   29.93    2.00
  -2  13  -5   31.39    2.07
  -3 -13  -5    3.80    1.25
  -3  13  -5    3.03    1.09
   3  13   5    4.05    1.04
  -4 -13  -5    8.67    1.39
  -4  13  -5    8.33    1.41
   7 -14  -5   -0.08    1.04
  -7  14   5    0.49    1.63
   7  14  -5   -0.13    1.15
   6 -14  -5   87.15    4.14
  -6  14   5   79.28    4.51
   6  14  -5   85.05    4.16
   5 -14  -5   89.90    4.13
  -5  14   5   82.23    4.37
   5  14  -5   86.88    4.12
   4 -14  -5   78.96    3.79
  -4  14   5   81.19    3.99
   3 -14  -5   79.04    3.74
   3  14  -5   74.91    3.62
  -3  14   5   82.18    4.63
   2 -14  -5   12.11    1.21
  -2  14   5   16.63    1.79
   2  14  -5   12.81    1.15
   2  14  -5   11.66    1.14
   1 -14  -5    1.45    0.75
   1  14  -5    0.77    0.68
   1  14  -5    0.67    0.68
   0 -14  -5   10.00    1.23
   0  14  -5    8.91    1.05
   0  14   5    8.95    1.16
   0  14  -5    8.77    1.05
  -1 -14  -5    6.57    1.17
   1  14   5    8.56    1.14
  -2 -14  -5    4.25    1.19
   2  14   5    4.37    1.02
  -2  14  -5    5.94    1.10
  -3 -14  -5    1.64    1.35
   3  14   5    2.67    1.05
  -3  14  -5    1.18    0.95
  -4 -14  -5    1.55    1.16
  -4  14  -5    1.42    1.20
   7 -15  -5    2.80    1.13
  -7  15   5    4.19    1.83
   7  15  -5    5.95    1.44
   6 -15  -5   44.19    2.63
   6  15  -5   42.67    2.69
  -6  15   5   37.88    3.09
   5 -15  -5   18.78    1.68
  -5  15   5   20.24    2.06
   5  15  -5   19.38    1.78
   4 -15  -5   47.36    2.60
  -4  15   5   46.84    2.86
   4  15  -5   47.56    2.62
   3 -15  -5    4.35    0.91
  -3  15   5    3.37    0.96
   3  15  -5    5.20    0.96
   2 -15  -5    2.50    0.82
  -2  15   5    2.86    0.82
   2  15  -5    2.27    0.75
   2  15  -5    2.12    0.79
   1 -15  -5    5.97    1.25
   1  15  -5    3.90    0.89
  -1  15   5    4.16    0.91
   1  15  -5    4.53    0.86
   0 -15  -5   33.09    2.29
   0  15  -5   33.43    2.01
   0  15  -5   31.29    1.98
   0  15   5   34.86    2.06
  -1  15  -5  132.27    5.93
   1  15   5  140.09    5.98
  -2 -15  -5   96.27    4.76
  -2  15  -5  100.33    4.65
   2  15   5  101.13    4.62
  -3 -15  -5   25.28    2.31
   3  15   5   25.16    2.06
  -3  15  -5   21.14    1.99
  -4  15  -5    0.28    1.23
   7 -16  -5   14.27    1.72
  -7  16   5   12.14    2.19
   7  16  -5   16.07    1.89
   6 -16  -5    2.66    1.12
   6  16  -5    1.38    1.15
  -6  16   5    2.80    1.57
   5 -16  -5   35.51    2.29
  -5  16   5   31.98    2.66
   5  16  -5   36.13    2.34
   4 -16  -5   46.52    2.57
   4  16  -5   46.00    2.61
  -4  16   5   42.10    2.80
   3 -16  -5    2.53    0.89
   3  16  -5    3.26    0.91
  -3  16   5    1.79    0.96
   2 -16  -5   13.67    1.38
   2  16  -5   15.50    1.37
   2  16  -5   14.67    1.27
  -2  16   5   14.44    1.42
   1 -16  -5  105.79    4.79
   1  16  -5  101.06    4.63
   1  16  -5  101.41    4.60
  -1  16   5  107.81    4.78
   0 -16  -5   87.24    4.27
   0  16  -5   82.75    4.64
   0  16  -5   90.15    4.12
   0  16   5   94.22    4.20
  -1 -16  -5   17.75    1.74
   1  16   5   18.59    1.66
  -1  16  -5   19.07    1.71
  -2 -16  -5    9.06    1.53
  -2  16  -5    7.76    1.32
   2  16   5    9.36    1.31
  -3 -16  -5  102.81    5.46
  -3  16  -5  119.06    5.43
   3  16   5  120.48    5.31
  -4 -16  -5    8.63    1.89
   4  16   5   12.93    1.65
  -4  16  -5    9.00    1.68
   7 -17  -5   12.59    1.72
  -7  17   5   14.93    2.40
   7  17  -5   12.48    1.83
   6 -17  -5   41.04    2.69
   6  17  -5   40.71    2.78
  -6  17   5   37.22    3.28
   5 -17  -5    3.23    1.05
  -5  17   5    3.68    1.46
   5  17  -5    2.50    1.14
   4 -17  -5    3.41    0.97
  -4  17   5    5.31    1.32
   4  17  -5    3.02    1.02
   3 -17  -5    0.35    0.82
   3  17  -5    0.58    0.97
  -3  17   5    0.32    0.94
   2 -17  -5  219.89    9.20
  -2  17   5  207.82    9.16
   2  17  -5  220.19    9.05
   2  17  -5  216.85    8.92
   1 -17  -5   49.41    2.78
   1  17  -5   51.24    2.71
   1  17  -5   50.44    2.65
  -1  17   5   47.08    2.73
   0 -17  -5   23.22    1.95
   0  17   5   20.44    1.74
   0  17  -5   21.90    1.81
  -1 -17  -5   24.93    2.15
   1  17   5   26.11    1.96
  -1  17  -5   28.39    2.11
  -2 -17  -5    3.77    1.31
  -2  17  -5    3.96    1.24
   2  17   5    4.84    1.16
  -3 -17  -5    1.35    1.46
  -3  17  -5    1.08    1.29
   3  17   5    2.48    1.15
   6 -18  -5    3.19    1.21
  -6  18   5    2.58    1.67
   6  18  -5    2.07    1.26
   5 -18  -5    2.50    1.08
  -5  18   5    1.54    1.39
   5  18  -5    2.09    1.13
   4 -18  -5   59.53    3.21
   4  18  -5   57.83    3.17
  -4  18   5   55.72    3.43
   3 -18  -5  113.26    5.15
  -3  18   5  101.25    5.20
   3  18  -5  116.20    5.09
   2 -18  -5    0.77    0.91
   2  18  -5   -0.02    0.95
  -2  18   5    1.45    0.94
   2  18  -5    0.21    0.95
   1 -18  -5   25.38    1.99
  -1  18   5   25.18    1.93
   1  18  -5   25.45    1.92
   1  18  -5   28.40    2.05
   0 -18  -5   54.56    3.12
   0  18   5   54.83    2.96
   0  18  -5   53.28    2.99
  -1 -18  -5    6.31    1.33
   1  18   5   10.30    1.34
  -1  18  -5    6.16    1.31
  -2 -18  -5    5.45    1.51
   2  18   5    6.69    1.29
  -2  18  -5    5.67    1.40
  -3 -18  -5   -0.02    1.47
   3  18   5   -0.04    1.11
  -3  18  -5   -0.05    1.34
   6 -19  -5    1.60    1.19
   6  19  -5    0.03    1.29
  -6  19   5    1.33    1.70
   5 -19  -5    1.23    1.07
   5  19  -5    3.29    1.24
  -5  19   5    2.90    1.50
   4 -19  -5    0.45    1.02
  -4  19   5   -0.36    1.18
   4  19  -5   -0.43    0.99
   3 -19  -5   58.57    3.24
   3  19  -5   60.71    3.22
  -3  19   5   57.57    3.33
   2 -19  -5    1.64    1.00
  -2  19   5    1.13    1.02
   2  19  -5    0.86    0.99
   1 -19  -5   20.71    1.90
   1  19  -5   22.43    1.91
  -1  19   5   21.03    1.90
   1  19  -5   21.26    1.83
   0 -19  -5   50.36    3.03
   0  19  -5   47.17    3.07
   0  19   5   50.64    2.86
  -1 -19  -5    3.05    1.35
  -1  19  -5    2.87    1.27
   1  19   5    2.29    1.07
  -2 -19  -5   56.89    3.60
   2  19   5   59.02    3.31
  -2  19  -5   66.59    3.57
  -3 -19  -5    6.55    1.79
   3  19   5    8.98    1.49
  -3  19  -5    9.00    1.77
   6 -20  -5   -0.55    1.16
  -6  20   5    0.22    1.69
   6  20  -5    1.02    1.43
   5 -20  -5  178.73    7.59
   5  20  -5  169.74    7.61
  -5  20   5  160.20    7.84
   4 -20  -5    3.70    1.22
   4  20  -5    3.08    1.22
  -4  20   5    4.36    1.45
   3 -20  -5    9.68    1.45
   3  20  -5    7.67    1.39
  -3  20   5    7.33    1.45
   2 -20  -5   21.87    1.96
  -2  20   5   17.32    1.87
   1 -20  -5    3.22    1.18
   1  20  -5    1.15    1.17
  -1  20   5    3.12    1.10
   1  20  -5    2.20    1.19
   0 -20  -5   -0.30    1.07
   0  20   5    0.21    1.01
   0  20  -5   -0.38    1.11
  -1 -20  -5    0.88    1.28
   1  20   5    0.07    1.04
  -1  20  -5   -0.36    1.13
  -2 -20  -5    3.06    1.53
   2  20   5    1.73    1.21
  -2  20  -5    1.12    1.34
   5 -21  -5    2.80    1.24
   5  21  -5    3.80    1.46
  -5  21   5    2.79    1.63
   4 -21  -5   11.02    1.62
  -4  21   5   12.88    1.91
   4  21  -5   12.54    1.68
   3 -21  -5   33.16    2.40
  -3  21   5   26.77    2.48
   3  21  -5   28.86    2.39
   2  21  -5    1.79    1.26
  -2  21   5    1.47    1.21
   1 -21  -5    0.03    1.07
  -1  21   5    0.27    1.03
   1  21  -5    0.97    1.31
   1  21  -5    0.29    1.27
   0 -21  -5   25.06    2.35
   0  21   5   26.73    2.24
   0  21  -5   26.59    2.38
  -1 -21  -5    0.67    1.37
   1  21   5    0.49    1.11
  -1  21  -5    1.81    1.37
  -2 -21  -5   73.34    4.43
   2  21   5   85.43    4.27
  -2  21  -5   87.56    4.50
   5 -22  -5    1.54    1.24
  -5  22   5    0.61    1.57
   5  22  -5    0.29    1.38
   4 -22  -5    0.03    1.16
  -4  22   5    0.23    1.38
   4  22  -5    0.76    1.30
   3 -22  -5   33.78    2.62
   3  22  -5   36.72    2.72
  -3  22   5   34.73    2.77
   2 -22  -5    2.02    1.16
   2  22  -5    1.97    1.37
  -2  22   5    2.36    1.28
   1 -22  -5    1.88    1.24
  -1  22   5    4.71    1.31
   1  22  -5    3.03    1.51
   0 -22  -5   86.76    4.70
   0  22   5   91.10    4.59
   0  22  -5   97.39    4.72
  -1 -22  -5    1.49    1.42
  -1  22  -5   -0.27    1.41
   1  22   5    0.23    1.17
  -2 -22  -5    9.64    1.89
  -2  22  -5   10.92    1.94
   2  22   5   10.97    1.70
   4 -23  -5    5.44    1.49
   4  23  -5    3.37    1.54
  -4  23   5    3.35    1.63
   3 -23  -5   10.54    1.62
   3  23  -5   13.23    1.87
  -3  23   5   11.23    1.76
   2 -23  -5   64.08    3.81
   2  23  -5   74.67    3.96
  -2  23   5   71.65    3.96
   1 -23  -5   24.29    2.28
  -1  23   5   24.02    2.29
   1  23  -5   23.54    3.21
   0 -23  -5    8.81    1.68
   0  23  -5    5.18    1.71
   0  23   5    7.40    1.53
  -1 -23  -5    4.06    1.55
   1  23   5    5.07    1.45
  -1  23  -5    2.58    1.63
   4 -24  -5   47.07    3.19
   4  24  -5   45.82    3.34
  -4  24   5   43.15    3.37
   3 -24  -5   -0.81    1.19
  -3  24   5    0.62    1.33
   3  24  -5    0.65    1.55
   2 -24  -5   52.46    3.36
  -2  24   5   54.86    3.45
   2  24  -5   54.99    3.54
   1 -24  -5   28.43    2.59
  -1  24   5   28.41    2.52
   0 -24  -5   30.17    2.73
   0  24  -5   28.09    2.63
   0  24   5   33.61    2.66
   2 -25  -5    2.99    1.41
   2  25  -5    1.69    1.71
  -2  25   5    8.88    1.71
   1 -25  -5    5.86    1.59
  -1  25   5    6.49    1.61
   8   0  -6   12.62    1.57
   7   0  -6    0.63    0.88
  -6   0   6   76.28    3.38
   6   0  -6   76.87    3.66
   5   0  -6    0.08    0.67
  -5   0   6   -0.05    0.53
  -4   0   6   43.75    2.08
   4   0  -6   39.86    2.17
   3   0  -6    0.19    0.49
  -3   0   6   -0.24    0.47
  -2   0   6  985.56   39.18
   2   0  -6 1000.00   39.19
  -1   0   6   -0.10    0.50
   1   0  -6    0.13    0.46
   0   0  -6   21.56    1.27
  -2   0  -6   44.79    2.44
  -3   0  -6    0.02    0.83
  -4   0  -6   29.03    2.23
   8  -1  -6    3.85    1.21
   8   1  -6    4.27    1.20
   7  -1  -6   43.49    2.53
   7   1  -6   43.85    2.53
   6  -1  -6   35.52    2.14
  -6   1   6   36.05    1.92
   6   1  -6   36.65    2.14
  -5  -1   6   14.47    1.08
   5   1  -6   13.32    1.38
  -5   1   6   12.99    1.08
   4  -1  -6  209.49    8.76
  -4  -1   6  214.45    8.60
   4   1  -6  213.01    8.76
  -4   1   6  209.58    8.63
   3  -1  -6    8.39    0.91
  -3  -1   6    7.88    0.81
   3   1  -6    6.57    0.82
  -3   1   6    9.96    0.90
  -2  -1   6    6.29    0.78
   2  -1  -6    6.68    0.81
   2   1  -6    6.45    0.78
  -2   1   6    6.04    0.80
  -1  -1   6   -0.49    0.50
   1  -1  -6    0.00    0.46
   1   1  -6    0.84    0.50
  -1   1   6    0.12    0.51
   0  -1  -6  240.25    9.46
   0   1  -6  227.19    9.60
   0   1  -6  241.42    9.44
   0   1   6  226.90    9.60
  -2  -1  -6   46.24    2.53
  -2   1  -6   47.69    2.54
  -3  -1  -6   75.85    3.75
  -3   1  -6   75.83    3.72
  -4  -1  -6    6.06    1.25
  -4   1  -6    4.90    1.25
   8  -2  -6   54.10    3.14
   8   2  -6   53.43    3.07
   7  -2  -6   70.22    3.44
   7   2  -6   65.71    3.42
   6  -2  -6   17.04    1.47
  -6   2   6   17.26    1.30
   6   2  -6   17.33    1.48
  -5  -2   6    4.43    0.66
   5   2  -6    3.39    0.87
  -5   2   6    3.83    0.72
  -4  -2   6   85.46    3.59
   4  -2  -6   81.82    3.76
   4   2  -6   82.69    3.75
  -4   2   6   81.54    3.64
   3  -2  -6   10.76    1.04
  -3  -2   6   11.21    0.95
   3   2  -6   11.00    1.00
  -3   2   6   11.47    0.97
  -2  -2   6    2.12    0.58
   2  -2  -6    1.27    0.53
  -2   2   6    2.27    0.59
   2   2  -6    1.78    0.57
   1  -2  -6    0.77    0.49
   1   2  -6    0.69    0.48
  -1   2   6   -0.04    0.51
   1   2  -6    0.83    0.53
   0  -2  -6  151.07    6.07
   0   2  -6  149.99    6.02
   0   2   6  141.94    6.21
   0   2  -6  143.73    6.20
  -1  -2  -6   23.56    1.36
  -2  -2  -6   59.45    3.03
  -2   2  -6   61.54    3.04
  -3  -2  -6   49.14    2.76
  -3   2  -6   50.44    2.73
  -4  -2  -6   12.47    1.56
  -4   2  -6   15.26    1.67
   8  -3  -6    2.40    1.08
   8   3  -6    2.65    1.18
   7  -3  -6   12.25    1.39
   7   3  -6   11.45    1.41
   6  -3  -6   48.87    2.62
   6   3  -6   52.27    2.63
  -6   3   6   46.22    2.41
   5  -3  -6  198.41    8.56
  -5  -3   6  206.54    8.06
   5   3  -6  186.30    8.88
  -5   3   6  200.85    8.18
  -4  -3   6    7.98    0.79
   4  -3  -6    8.45    0.97
   4   3  -6    7.89    0.94
  -4   3   6    7.60    0.83
   3  -3  -6   29.38    1.68
  -3  -3   6   28.72    1.59
   3   3  -6   30.66    1.68
  -3   3   6   30.66    1.66
   2  -3  -6    0.17    0.48
  -2  -3   6    0.16    0.51
   2   3  -6   -0.09    0.49
  -2   3   6    0.02    0.50
   1  -3  -6    1.90    0.58
  -1   3   6    1.42    0.58
   1   3  -6    1.25    0.56
   1   3  -6    1.41    0.51
   0  -3  -6    5.28    0.72
   0   3   6    4.35    0.83
   0   3  -6    4.20    0.76
  -1  -3  -6  149.87    5.96
   1   3   6  136.57    6.27
  -2  -3  -6   36.11    2.15
  -2   3  -6   36.58    2.15
  -3  -3  -6    3.40    1.00
  -3   3  -6    4.94    1.08
  -4  -3  -6    0.83    1.03
  -4   3  -6    0.47    1.06
   8  -4  -6    3.23    1.17
   8   4  -6    2.17    1.16
   7  -4  -6   72.13    3.68
   7   4  -6   78.30    3.73
  -7   4   6   72.68    3.50
   6  -4  -6   23.70    1.68
  -6   4   6   25.06    1.58
   6   4  -6   18.95    1.63
   5  -4  -6   31.74    1.87
  -5  -4   6   30.16    1.57
  -5   4   6   28.96    1.71
  -4  -4   6   16.96    1.15
   4  -4  -6   18.99    1.35
   4   4  -6   17.43    1.31
  -4   4   6   18.19    1.28
  -3  -4   6   27.43    1.48
   3  -4  -6   25.41    1.56
  -3   4   6   25.04    1.53
   3   4  -6   27.95    1.56
   2  -4  -6    5.03    0.73
  -2   4   6    4.77    0.74
   2   4  -6    5.62    0.71
   2   4  -6    5.67    0.70
   1  -4  -6   38.66    1.94
   1   4  -6   37.59    1.86
   1   4  -6   38.73    1.97
  -1   4   6   38.14    2.02
   0  -4  -6   35.22    1.82
   0   4  -6   33.75    1.89
   0   4   6   34.31    1.95
   0   4  -6   35.79    1.67
  -1  -4  -6   33.13    1.71
   1   4   6   30.32    1.89
  -2  -4  -6  117.43    5.16
  -2   4  -6  114.40    5.15
  -3  -4  -6   21.89    1.83
  -3   4  -6   22.25    1.81
  -4  -4  -6    2.39    1.14
  -4   4  -6    2.42    1.17
   8  -5  -6   46.60    2.80
   8   5  -6   43.18    2.86
   7  -5  -6    0.77    0.86
  -7   5   6    0.48    0.85
   7   5  -6    0.11    0.94
   6  -5  -6   37.61    2.23
   6   5  -6   38.21    2.24
  -6   5   6   38.64    2.13
   5  -5  -6    7.27    1.02
   5   5  -6    7.74    1.31
  -5   5   6    7.36    0.92
  -4  -5   6    7.69    0.77
   4  -5  -6   10.89    1.11
  -4   5   6    8.09    0.91
   4   5  -6    7.04    0.90
   3  -5  -6  131.85    5.56
  -3   5   6  128.17    5.51
   3   5  -6  127.04    5.49
   3   5  -6  132.68    5.40
   2  -5  -6   11.36    1.07
   2   5  -6   13.72    1.03
  -2   5   6   13.27    1.13
   2   5  -6   12.54    1.01
   1  -5  -6   32.43    1.79
   1   5  -6   34.67    1.80
   1   5  -6   32.96    1.69
  -1   5   6   34.64    1.87
   0  -5  -6   75.60    3.36
   0   5  -6   78.50    3.47
   0   5  -6   73.51    3.22
   0   5   6   76.59    3.50
  -1  -5  -6    4.29    0.72
   1   5   6    3.02    0.79
  -2  -5  -6   53.25    2.80
  -2   5  -6   52.32    2.76
  -3  -5  -6    0.49    0.88
  -3   5  -6    0.31    0.90
  -4  -5  -6  100.56    4.85
  -4   5  -6  101.74    4.87
   8  -6  -6    5.41    1.31
   8   6  -6    4.24    1.35
   7  -6  -6    0.71    0.91
  -7   6   6    1.36    0.92
   7   6  -6    0.49    0.97
   6  -6  -6   29.17    1.93
   6   6  -6   28.16    1.96
  -6   6   6   29.85    1.89
   5  -6  -6   93.31    4.25
   5   6  -6   92.46    4.23
  -5   6   6   91.67    4.13
   4  -6  -6    1.10    0.59
  -4   6   6    2.05    0.67
   4   6  -6    0.20    0.59
   4   6  -6    0.85    0.49
   3  -6  -6  196.98    8.40
  -3   6   6  196.16    8.36
   3   6  -6  207.55    8.36
   3   6  -6  210.18    8.24
   2  -6  -6  217.95    8.99
  -2   6   6  220.40    9.01
   2   6  -6  219.02    8.91
   2   6  -6  218.07    8.89
   1  -6  -6  256.13   10.31
   1   6  -6  252.90   10.20
   1   6  -6  248.94   10.29
  -1   6   6  255.32   10.37
   0  -6  -6   10.27    0.94
   0   6  -6    6.96    0.88
   0   6  -6    8.95    0.73
   0   6   6    8.33    0.95
  -1  -6  -6   19.57    1.36
   1   6   6   19.01    1.51
  -1   6  -6   28.47    1.86
  -2  -6  -6   22.29    1.69
  -2   6  -6   20.35    1.66
  -3  -6  -6    8.23    1.22
  -3   6  -6    9.23    1.32
  -4  -6  -6    8.10    1.38
  -4   6  -6    8.72    1.45
   8  -7  -6   19.07    1.85
   8   7  -6   22.08    2.08
   7  -7  -6  101.62    4.82
   7   7  -6  104.31    4.86
   6  -7  -6    1.30    0.80
   6   7  -6    1.84    0.89
  -6   7   6    1.83    0.86
   5  -7  -6    8.55    1.07
   5   7  -6    8.84    1.09
  -5   7   6   10.11    1.11
   4  -7  -6  149.03    6.41
   4   7  -6  148.67    6.37
  -4   7   6  153.88    6.37
   4   7  -6  148.74    6.11
   3  -7  -6   97.87    4.28
   3   7  -6   92.75    4.20
   3   7  -6   97.32    4.07
  -3   7   6   96.61    4.26
   2  -7  -6   16.14    1.23
   2   7  -6   17.07    1.15
   2   7  -6   16.94    1.17
  -2   7   6   15.70    1.25
   1  -7  -6  116.14    5.08
   1   7  -6  116.83    4.96
  -1   7   6  122.19    5.17
   1   7  -6  121.78    5.08
   0  -7  -6   71.60    3.28
   0   7   6   70.01    3.75
   0   7  -6   75.68    3.40
   0   7  -6   72.19    3.33
  -1  -7  -6   10.48    1.01
  -1   7  -6    7.66    0.99
   1   7   6    7.91    1.08
   2   7   6    0.82    0.81
  -2   7  -6    1.31    0.84
  -3  -7  -6  102.00    4.81
  -3   7  -6  105.62    4.85
  -4  -7  -6   13.14    1.56
  -4   7  -6   14.94    1.68
   8  -8  -6   10.42    1.51
   8   8  -6   12.75    1.68
   7  -8  -6    0.11    0.91
   7   8  -6    1.36    1.02
  -7   8   6    0.94    1.05
   6  -8  -6    1.29    0.85
  -6   8   6    0.93    0.90
   6   8  -6    2.25    0.89
   5  -8  -6  122.07    5.36
   5   8  -6  120.66    5.34
  -5   8   6  120.86    5.32
  -4   8   6   63.31    3.03
   4   8  -6   64.44    2.75
   4   8  -6   60.60    3.00
   3  -8  -6    5.21    0.82
   3   8  -6    3.74    0.75
   3   8  -6    5.51    0.68
  -3   8   6    6.92    0.93
   2  -8  -6   12.83    1.13
  -2   8   6   14.07    1.19
   2   8  -6   12.58    1.05
   2   8  -6   12.73    1.04
   1  -8  -6    2.60    0.65
  -1   8   6    2.76    0.71
   1   8  -6    2.57    0.66
   1   8  -6    2.18    0.57
   0  -8  -6   30.65    1.70
   0   8  -6   27.93    1.72
   0   8   6   28.17    1.91
  -1  -8  -6  271.65   11.15
   1   8   6  282.75   11.31
  -1   8  -6  269.36   11.26
  -2  -8  -6    2.55    0.81
   2   8   6    1.95    0.89
  -2   8  -6    3.25    0.96
  -3  -8  -6   10.78    1.36
  -3   8  -6   11.95    1.47
  -4  -8  -6    4.90    1.28
  -4   8  -6    3.81    1.29
   8  -9  -6    7.56    1.37
   8   9  -6    5.82    1.43
  -8   9   6    5.87    1.60
   7  -9  -6   16.55    1.65
  -7   9   6   19.30    1.87
   7   9  -6   17.30    1.78
   6  -9  -6  168.26    7.28
   6   9  -6  170.97    7.29
  -6   9   6  164.65    7.27
   5  -9  -6   12.95    1.36
  -5   9   6   18.19    1.56
   5   9  -6   19.25    1.51
   4  -9  -6   53.15    2.69
  -4   9   6   50.06    2.65
   4   9  -6   52.25    2.62
   3  -9  -6   18.29    1.43
   3   9  -6   21.30    1.42
   3   9  -6   21.57    1.25
  -3   9   6   20.33    1.48
   2  -9  -6   10.11    1.04
   2   9  -6    9.18    0.92
   2   9  -6    9.15    0.88
  -2   9   6    8.88    0.99
   1  -9  -6   54.57    2.63
   1   9  -6   52.32    2.55
   1   9  -6   51.32    2.46
  -1   9   6   55.78    2.74
   0  -9  -6   19.93    1.41
   0   9  -6   19.12    1.43
   0   9   6   19.50    1.48
  -1  -9  -6    7.01    0.92
   1   9   6    6.80    1.02
  -1   9  -6    3.92    0.92
  -2  -9  -6  106.28    4.53
  -2   9  -6   96.98    4.67
   2   9   6  101.72    4.68
  -3  -9  -6   17.75    1.73
  -3   9  -6   17.30    1.70
  -4  -9  -6    4.38    1.31
  -4   9  -6    5.86    1.42
   8 -10  -6   28.75    2.27
  -8  10   6   29.06    2.55
   8  10  -6   21.46    2.12
   7 -10  -6    4.40    1.14
  -7  10   6    6.66    1.44
   7  10  -6    5.06    1.23
   6 -10  -6   31.99    2.10
  -6  10   6   29.75    2.19
   6  10  -6   32.09    2.16
   5 -10  -6   21.71    1.62
   5  10  -6   18.56    1.61
  -5  10   6   21.66    1.72
   4 -10  -6   16.57    1.40
  -4  10   6   19.63    1.73
   4  10  -6   18.51    1.43
   3 -10  -6   68.49    3.30
   3  10  -6   66.27    3.18
   3  10  -6   68.51    3.03
  -3  10   6   71.46    3.31
   2 -10  -6    0.64    0.62
   2  10  -6    0.94    0.59
  -2  10   6   -0.16    0.61
   2  10  -6    0.39    0.56
   1 -10  -6   45.25    2.34
   1  10  -6   46.29    2.29
  -1  10   6   45.88    2.55
   1  10  -6   43.71    2.18
   0 -10  -6   27.59    1.70
   0  10   6   25.95    1.77
   0  10  -6   27.30    1.75
  -1 -10  -6   42.87    2.34
  -1  10  -6   44.36    2.42
   1  10   6   43.99    2.42
  -2 -10  -6   32.24    2.00
   2  10   6   30.65    2.11
  -2  10  -6   32.68    2.14
  -3 -10  -6    3.09    1.11
  -3  10  -6    1.65    1.03
  -4 -10  -6    6.98    1.46
  -4  10  -6    5.21    1.43
   8 -11  -6   74.85    4.07
  -8  11   6   82.32    4.54
   7 -11  -6   23.32    2.04
  -7  11   6   27.48    2.31
   7  11  -6   22.05    2.07
   6 -11  -6    1.20    0.85
  -6  11   6    1.64    1.09
   6  11  -6    0.73    0.94
   5 -11  -6    4.51    0.97
   5  11  -6    3.47    0.94
  -5  11   6    2.26    0.95
   4 -11  -6   31.53    2.03
  -4  11   6   38.64    2.14
   4  11  -6   33.53    2.04
   3 -11  -6   13.84    1.29
  -3  11   6   10.72    1.26
   3  11  -6   11.42    1.03
   3  11  -6   12.26    1.17
   2 -11  -6    6.27    0.94
  -2  11   6    5.11    0.86
   2  11  -6    6.09    0.86
   2  11  -6    6.22    0.80
   1 -11  -6   49.73    2.57
   1  11  -6   50.14    2.48
  -1  11   6   50.85    2.61
   1  11  -6   50.35    2.41
   0 -11  -6    0.39    0.71
   0  11  -6    0.37    0.69
   0  11   6    0.77    0.72
  -1 -11  -6    2.98    0.91
   1  11   6    2.56    0.89
  -1  11  -6    2.25    0.86
  -2 -11  -6    0.74    0.93
   2  11   6   -0.11    0.89
  -2  11  -6    0.38    0.92
  -3  11  -6   39.49    2.61
  -4 -11  -6  107.19    5.08
  -4  11  -6  102.99    5.14
   7 -12  -6    0.03    1.06
  -7  12   6    0.76    1.40
   7  12  -6    0.50    1.10
   6 -12  -6    2.90    0.99
  -6  12   6    2.57    1.22
   6  12  -6    3.60    1.10
   5 -12  -6   42.78    2.54
  -5  12   6   45.92    2.68
   5  12  -6   44.23    2.53
   4 -12  -6   -0.22    0.67
   4  12  -6    0.13    1.39
  -4  12   6    0.34    0.80
   3 -12  -6  185.01    8.10
   3  12  -6  191.53    8.04
   3  12  -6  199.15    7.85
  -3  12   6  193.41    8.16
   2  12  -6   48.77    2.26
   2  12  -6   43.66    2.28
  -2  12   6   40.49    2.41
   1 -12  -6  233.76    9.41
   1  12  -6  227.79    9.28
   1  12  -6  223.21    9.20
  -1  12   6  217.71    9.39
   0 -12  -6    4.84    0.94
   0  12   6    4.11    0.93
  -1 -12  -6   23.68    1.78
   1  12   6   26.08    1.86
  -1  12  -6   24.71    1.85
  -2 -12  -6    5.63    1.13
   2  12   6    5.54    1.15
  -2  12  -6    4.30    1.14
   3  12   6    0.72    1.07
  -3  12  -6    0.71    1.15
   7 -13  -6   11.11    1.60
   7  13  -6    9.63    1.52
  -7  13   6    9.88    1.85
   6 -13  -6   28.33    2.13
   6  13  -6   31.91    2.28
  -6  13   6   35.32    2.54
   5 -13  -6   47.54    2.80
  -5  13   6   49.07    2.95
   5  13  -6   56.50    2.87
   4 -13  -6    2.92    0.90
   4  13  -6    3.19    0.89
  -4  13   6    2.58    0.96
   3 -13  -6  243.98   10.02
  -3  13   6  234.85   10.04
   3  13  -6  248.15   10.00
   3  13  -6  233.90    9.90
   2 -13  -6    2.00    0.81
   2  13  -6    2.18    0.79
  -2  13   6    2.39    0.83
   2  13  -6    1.58    0.72
   1 -13  -6  104.53    5.02
   1  13  -6  109.42    4.68
  -1  13   6  105.03    4.81
   1  13  -6  106.15    4.61
   0  13  -6    2.41    1.06
   0  13   6    2.67    0.85
  -1 -13  -6   29.30    2.71
   1  13   6   25.89    1.89
  -1  13  -6   21.87    1.86
  -2  13  -6   26.93    2.12
   2  13   6   28.63    2.09
   3  13   6   22.57    1.97
  -3  13  -6   21.41    2.04
   7 -14  -6    1.90    1.17
   7  14  -6    3.30    1.30
  -7  14   6    1.77    1.64
   6 -14  -6   23.53    1.99
  -6  14   6   26.91    2.38
   6  14  -6   22.08    2.00
   5 -14  -6  123.75    5.63
  -5  14   6  125.70    5.82
   5  14  -6  126.19    5.64
   4 -14  -6    6.87    1.11
  -4  14   6    7.46    1.26
   4  14  -6    4.98    1.03
   3 -14  -6    6.12    1.00
  -3  14   6    5.47    1.07
   3  14  -6    4.23    0.93
   2 -14  -6    0.13    0.75
   2  14  -6    0.14    0.74
   2  14  -6   -0.30    0.68
  -2  14   6    0.49    0.77
   1 -14  -6    1.31    0.81
   1  14  -6    1.24    0.80
  -1  14   6    0.90    0.76
   1  14  -6    1.19    0.80
   0 -14  -6   38.37    2.35
   0  14  -6   37.19    2.48
   0  14   6   38.77    2.31
  -1 -14  -6  164.64    7.19
   1  14   6  166.57    7.18
  -1  14  -6  164.91    7.14
  -2 -14  -6   75.33    3.75
   2  14   6   74.22    3.69
  -2  14  -6   64.49    3.65
   3  14   6   -0.17    1.12
  -3  14  -6    0.62    1.19
   7 -15  -6   59.60    3.41
   7  15  -6   60.54    3.54
  -7  15   6   56.84    3.94
   6 -15  -6   14.82    1.65
   6  15  -6   17.69    1.74
  -6  15   6   18.05    2.10
   5 -15  -6   34.72    2.30
   5  15  -6   35.51    2.37
  -5  15   6   35.77    2.61
   4 -15  -6   53.67    2.95
   4  15  -6   58.15    2.94
  -4  15   6   51.04    3.05
   3 -15  -6    2.32    0.91
  -3  15   6    3.98    1.03
   3  15  -6    3.34    0.95
   2 -15  -6    4.89    1.04
  -2  15   6    5.89    1.13
   2  15  -6    3.97    0.88
   2  15  -6    3.47    0.91
   1 -15  -6   29.89    2.03
   1  15  -6   29.17    1.91
  -1  15   6   29.75    2.00
   1  15  -6   29.37    1.92
   0 -15  -6   61.37    3.31
   0  15  -6   65.28    3.24
   0  15   6   64.38    3.28
  -1 -15  -6   28.29    2.17
   1  15   6   29.26    2.10
  -1  15  -6   29.39    2.12
  -2 -15  -6   13.42    1.70
  -2  15  -6   10.56    1.56
   2  15   6   13.91    1.58
   3  15   6   38.07    2.66
  -3  15  -6   37.64    2.65
   6 -16  -6   17.84    1.84
  -6  16   6   22.12    2.34
   6  16  -6   18.00    1.93
   5 -16  -6    1.13    0.99
  -5  16   6    0.80    1.24
   5  16  -6    1.06    1.08
   4 -16  -6   39.42    2.46
   4  16  -6   42.73    2.51
  -4  16   6   40.07    2.66
   3 -16  -6    5.03    1.11
  -3  16   6    7.12    1.29
   2 -16  -6   63.04    3.35
   2  16  -6   67.75    3.25
   2  16  -6   64.35    3.13
  -2  16   6   63.87    3.37
   1 -16  -6    4.33    1.09
  -1  16   6    3.92    1.03
   1  16  -6    4.94    1.02
   0 -16  -6   50.34    2.81
   0  16  -6   47.29    2.66
   0  16   6   44.79    2.73
  -1 -16  -6    1.23    1.14
  -1  16  -6    0.21    0.97
   1  16   6    0.25    0.97
  -2 -16  -6    0.21    1.28
   2  16   6    0.35    1.04
  -2  16  -6    1.80    1.15
  -3  16  -6   18.43    2.03
   3  16   6   26.28    2.28
   6 -17  -6    8.14    1.48
   6  17  -6    7.32    1.48
  -6  17   6    5.35    1.72
   5 -17  -6    6.02    1.30
  -5  17   6    5.03    1.48
   5  17  -6    4.38    1.29
   4 -17  -6    1.74    0.98
   4  17  -6    0.98    1.02
  -4  17   6    0.98    1.09
   3 -17  -6    7.87    1.29
   3  17  -6    5.91    1.16
  -3  17   6    6.21    1.29
   2 -17  -6   -0.24    0.90
  -2  17   6    0.20    0.92
   2  17  -6   -0.50    1.00
   2  17  -6    0.41    0.93
   1 -17  -6    0.56    1.00
   1  17  -6   -0.21    0.92
  -1  17   6   -0.42    0.84
   0 -17  -6    2.76    1.15
   0  17   6    3.27    1.04
   0  17  -6    2.45    1.09
  -1 -17  -6    0.94    1.14
   1  17   6    0.35    1.03
  -1  17  -6    0.07    1.07
  -2 -17  -6    3.01    1.46
   2  17   6    1.30    1.15
  -2  17  -6    1.68    1.27
   6 -18  -6    4.00    1.33
  -6  18   6    4.00    1.73
   6  18  -6    4.43    1.49
   5 -18  -6    0.41    1.04
  -5  18   6    0.39    1.34
   5  18  -6    0.51    1.13
   4 -18  -6    0.96    0.96
  -4  18   6    0.92    1.18
   4  18  -6    0.81    1.05
   3 -18  -6    6.45    1.26
  -3  18   6    4.91    1.25
   3  18  -6    7.20    1.27
   2 -18  -6  182.56    7.99
  -2  18   6  182.43    7.98
   2  18  -6  183.63    7.84
   1 -18  -6   16.53    1.78
   1  18  -6   17.69    1.66
  -1  18   6   15.74    1.63
   0 -18  -6   23.42    2.12
   0  18  -6   22.50    1.92
   0  18   6   20.77    1.88
  -1 -18  -6   12.36    1.77
  -1  18  -6   13.20    1.67
   1  18   6   14.01    1.68
  -2 -18  -6   -0.19    1.42
   2  18   6    1.01    1.23
  -2  18  -6   -0.83    1.29
   5 -19  -6   35.29    2.47
   5  19  -6   28.36    2.47
  -5  19   6   26.60    2.57
   4 -19  -6   99.21    4.98
  -4  19   6   99.67    5.14
   4  19  -6  112.42    5.04
   3 -19  -6   30.53    2.31
   3  19  -6   29.64    2.28
  -3  19   6   27.21    2.30
   2 -19  -6    1.69    1.09
  -2  19   6    0.94    1.04
   1 -19  -6    4.31    1.31
  -1  19   6    5.16    1.22
   0 -19  -6   76.47    4.29
   0  19   6   89.02    4.28
   0  19  -6   86.85    4.24
  -1 -19  -6   22.17    2.26
   1  19   6   23.45    2.06
  -1  19  -6   17.56    1.94
   5 -20  -6    3.80    1.33
   5  20  -6    5.58    1.54
  -5  20   6    5.03    1.68
   4 -20  -6   35.13    2.46
  -4  20   6   28.81    2.68
   4  20  -6   34.85    2.59
   3 -20  -6    2.42    1.22
   3  20  -6    1.01    1.22
  -3  20   6    1.92    1.17
   2 -20  -6   24.71    2.13
  -2  20   6   20.71    2.02
   2  20  -6   21.41    2.01
   1 -20  -6   25.90    2.27
  -1  20   6   26.05    2.25
   1  20  -6   18.30    1.87
   0 -20  -6   78.20    4.31
   0  20  -6   85.99    4.28
   0  20   6   82.56    4.23
  -1 -20  -6    2.34    1.46
   1  20   6   -0.22    1.20
  -1  20  -6    1.09    1.43
   4 -21  -6   15.61    1.81
   4  21  -6   13.94    1.80
  -4  21   6   17.60    2.06
   3 -21  -6    0.57    1.20
   3  21  -6    1.73    1.29
  -3  21   6    0.50    1.19
   2 -21  -6    7.26    1.46
  -2  21   6    7.03    1.50
   2  21  -6    8.58    1.61
   1 -21  -6    1.20    1.25
  -1  21   6    1.33    1.24
   0 -21  -6   36.42    2.88
   0  21   6   40.61    2.79
   0  21  -6   41.23    2.90
   4 -22  -6    4.56    1.37
   4  22  -6    4.22    1.59
  -4  22   6    4.91    1.59
   3 -22  -6   17.26    2.01
   3  22  -6   13.99    1.95
  -3  22   6   16.76    2.01
   2 -22  -6   64.30    3.74
  -2  22   6   62.52    3.68
   1 -22  -6   27.22    2.51
  -1  22   6   27.26    2.44
   0 -22  -6    1.00    1.39
   0  22   6   -0.32    1.23
   0  22  -6    1.14    1.53
   2 -23  -6    5.03    1.51
  -2  23   6    6.85    1.53
   8   0  -7   -0.34    1.03
   7   0  -7   20.00    1.81
   6   0  -7    0.12    0.80
   5   0  -7   39.55    2.32
  -5   0   7   43.22    2.18
   4   0  -7   -0.31    0.71
  -4   0   7    0.36    0.62
   3   0  -7   18.49    1.41
  -3   0   7   21.19    1.42
  -2   0   7   -0.13    0.63
   2   0  -7    0.35    0.60
   1   0  -7   36.37    1.90
  -1   0   7   32.23    2.16
   0   0  -7    0.13    0.69
  -1   0  -7   19.88    1.68
  -2   0  -7    0.01    0.89
  -3   0  -7  121.31    5.61
   8  -1  -7    2.17    1.17
   8   1  -7    4.00    1.27
   7  -1  -7    0.73    0.94
   7   1  -7    0.54    0.96
   6  -1  -7    4.43    1.00
  -6   1   7    7.42    1.09
   6   1  -7    7.13    1.07
  -5  -1   7    4.73    0.80
   5  -1  -7    4.39    0.90
  -5   1   7    4.14    0.79
   5   1  -7    3.66    0.86
  -4  -1   7   60.95    2.84
   4   1  -7   61.20    2.99
  -4   1   7   57.93    2.84
   3  -1  -7   27.70    1.67
  -3  -1   7   25.97    1.63
   3   1  -7   27.42    1.68
  -3   1   7   24.72    1.63
   2  -1  -7  237.37    9.68
  -2  -1   7  233.51    9.67
  -2   1   7  236.31    9.70
   2   1  -7  236.24    9.66
   1  -1  -7   63.03    3.00
   1   1  -7   65.88    3.25
   1   1  -7   66.13    3.00
   0  -1  -7   15.11    1.23
   0  -1  -7   17.59    1.47
   0   1  -7   16.52    1.44
  -1  -1  -7    6.08    1.08
  -1   1  -7    5.86    1.05
  -2  -1  -7   13.16    1.45
  -2   1  -7   10.44    1.38
  -3  -1  -7   49.43    2.92
  -3   1  -7   47.59    2.91
   8  -2  -7   13.78    1.73
   8   2  -7   15.47    1.72
   7  -2  -7   64.26    3.50
   7   2  -7   72.29    3.55
   6  -2  -7   10.64    1.29
   6   2  -7   11.70    1.33
  -6   2   7    9.41    1.08
  -5  -2   7    0.72    0.68
   5  -2  -7    1.47    0.79
   5   2  -7    0.24    0.71
  -5   2   7    1.25    0.70
   4  -2  -7  228.74    9.60
  -4  -2   7  222.05    9.02
   4   2  -7  218.04    9.17
  -4   2   7  213.89    9.05
   3  -2  -7    1.86    0.72
  -3  -2   7    1.26    0.65
   3   2  -7    1.12    0.66
  -3   2   7    1.10    0.64
   2  -2  -7    3.86    0.78
  -2  -2   7    5.27    0.87
   2   2  -7    5.98    0.84
  -2   2   7    3.11    0.77
   1  -2  -7    1.73    0.67
   1   2  -7    1.04    0.68
   1   2  -7    0.66    0.63
  -1   2   7    1.12    0.77
   0  -2  -7  115.82    4.78
   0   2  -7  109.46    4.96
   0   2   7  108.12    4.94
  -1  -2  -7  157.83    6.88
  -1   2  -7  161.36    6.89
  -2  -2  -7    0.73    0.93
  -2   2  -7    0.75    0.90
  -3  -2  -7   13.52    1.62
  -3   2  -7   15.15    1.67
   8  -3  -7   14.84    1.67
   8   3  -7   21.08    1.97
   7  -3  -7    0.62    0.94
   7   3  -7    0.47    0.92
   6  -3  -7  199.50    8.65
  -6   3   7  199.75    8.41
   6   3  -7  211.56    8.66
  -5  -3   7   63.35    3.08
   5  -3  -7   63.37    3.20
   5   3  -7   66.12    3.21
  -5   3   7   64.73    3.03
   4  -3  -7   49.81    2.57
  -4  -3   7   49.37    2.41
  -4   3   7   49.99    2.46
   4   3  -7   46.30    2.52
   3  -3  -7    1.13    0.67
  -3  -3   7    1.77    0.71
  -3   3   7    1.83    0.71
   3   3  -7    1.95    0.71
   2  -3  -7   24.16    1.53
   2   3  -7   24.37    1.56
  -2   3   7   24.88    1.60
   2   3  -7   23.32    1.51
   1  -3  -7   12.43    1.17
  -1   3   7   14.68    1.28
   1   3  -7   13.37    1.15
   1   3  -7   18.21    1.39
   0  -3  -7   97.92    4.11
   0   3  -7   91.27    4.24
   0   3   7   90.56    4.25
  -1  -3  -7   22.28    1.79
  -1   3  -7   21.25    1.74
  -2  -3  -7   22.18    1.87
  -2   3  -7   19.18    1.70
  -3  -3  -7    5.77    1.29
  -3   3  -7    5.49    1.30
   8  -4  -7   69.31    3.86
   8   4  -7   79.23    4.00
   7  -4  -7    2.25    0.98
   7   4  -7    3.08    1.08
   6  -4  -7   58.32    3.06
   6   4  -7   56.77    3.04
  -6   4   7   58.91    2.89
   5  -4  -7   51.14    2.80
  -5   4   7   54.56    2.67
   5   4  -7   55.37    2.80
   4  -4  -7  107.33    4.53
  -4  -4   7   99.71    4.29
   4   4  -7   99.68    4.49
  -4   4   7   90.93    4.35
   3  -4  -7   30.88    1.87
   3   4  -7   33.78    1.82
   3   4  -7   33.67    1.88
  -3   4   7   31.20    1.89
   2  -4  -7   13.92    1.22
   2   4  -7   12.12    1.15
  -2   4   7   14.81    1.48
   2   4  -7   13.81    1.20
   1  -4  -7  117.74    5.41
   1   4  -7  139.12    5.38
  -1   4   7  115.92    5.50
   1   4  -7  136.17    5.54
   0  -4  -7    2.06    0.71
   0   4  -7    2.07    0.79
   0   4   7    1.63    0.81
  -1  -4  -7   75.48    3.72
  -1   4  -7   77.73    3.72
  -2  -4  -7   80.80    3.97
  -2   4  -7   81.35    3.98
  -3  -4  -7    1.09    1.12
  -3   4  -7    1.93    1.17
   8  -5  -7   28.86    2.41
   8   5  -7   36.56    2.61
   7  -5  -7    1.10    0.94
   7   5  -7    1.34    1.06
   6  -5  -7    5.93    1.14
   6   5  -7    5.18    1.05
  -6   5   7    8.63    1.13
   5  -5  -7    1.72    0.81
   5   5  -7    3.08    0.86
  -5   5   7    2.86    0.78
   4  -5  -7   46.77    2.46
  -4   5   7   44.94    2.36
   4   5  -7   44.19    2.25
   4   5  -7   46.75    2.51
   3  -5  -7  108.82    4.79
  -3   5   7  106.50    4.76
   3   5  -7  106.45    4.73
   3   5  -7  111.80    4.69
   2  -5  -7   92.61    4.25
   2   5  -7   97.22    4.20
   2   5  -7   95.62    4.24
  -2   5   7   98.62    4.64
   1  -5  -7  171.72    6.96
   1   5  -7  169.11    6.99
  -1   5   7  161.31    7.03
   1   5  -7  161.16    6.82
   0  -5  -7   18.91    1.41
   0   5   7   19.66    1.62
   0   5  -7   19.07    1.55
   1   5   7    8.80    1.21
  -1   5  -7    7.04    1.11
  -2  -5  -7   16.03    1.62
  -2   5  -7   13.19    1.50
  -3  -5  -7   28.37    2.32
  -3   5  -7   31.33    2.35
   8  -6  -7   13.51    1.65
   8   6  -7   11.70    1.69
   7  -6  -7    5.29    1.23
   7   6  -7    5.94    1.24
  -7   6   7    6.87    1.17
   6  -6  -7   18.64    1.68
   6   6  -7   18.83    1.71
   5  -6  -7   -0.96    0.74
   5   6  -7    1.04    0.80
  -5   6   7    0.08    0.74
   4  -6  -7   26.32    1.77
  -4   6   7   29.47    1.75
   4   6  -7   28.24    2.52
   4   6  -7   26.24    1.59
   3  -6  -7   21.35    1.69
   3   6  -7   22.82    1.45
   3   6  -7   21.05    1.48
   2  -6  -7   94.27    4.40
  -2   6   7   93.35    4.44
   2   6  -7  108.68    4.40
   2   6  -7  101.72    4.34
   1  -6  -7    2.31    0.71
   1   6  -7    2.68    0.77
   1   6  -7    2.02    0.65
  -1   6   7    1.85    0.80
   0  -6  -7    2.41    0.77
   0   6  -7    4.56    0.88
   0   6   7    2.71    0.86
  -1   6  -7   12.71    1.37
   1   6   7   16.37    1.46
  -2  -6  -7    4.25    1.09
  -2   6  -7    3.63    1.10
  -3  -6  -7   23.04    2.05
  -3   6  -7   25.47    2.22
   7  -7  -7   10.01    1.45
   7   7  -7   16.29    1.69
  -7   7   7   11.79    1.44
   6  -7  -7   -0.30    0.85
   6   7  -7    0.39    0.90
  -6   7   7    0.12    0.81
   5  -7  -7   12.49    1.39
  -5   7   7   16.42    1.46
   5   7  -7   17.67    1.53
   4  -7  -7    4.11    0.89
  -4   7   7    2.26    0.77
   4   7  -7    2.23    0.67
   3  -7  -7  131.25    5.73
   3   7  -7  128.71    5.64
  -3   7   7  129.31    5.68
   3   7  -7  136.10    5.55
   2  -7  -7   60.37    2.95
   2   7  -7   61.87    2.90
   2   7  -7   61.31    2.86
  -2   7   7   59.04    3.00
   1  -7  -7    7.70    1.00
  -1   7   7    7.50    1.02
   1   7  -7    6.29    1.27
   1   7  -7    9.32    1.06
   0  -7  -7   42.17    2.27
   0   7  -7   45.31    2.41
   0   7   7   42.60    2.44
  -1   7  -7    3.34    1.00
   1   7   7    1.51    0.94
  -2  -7  -7   62.55    3.39
  -2   7  -7   65.90    3.43
  -3  -7  -7   12.60    1.62
  -3   7  -7   12.13    1.61
   7  -8  -7   48.17    2.79
  -7   8   7   46.45    2.73
   7   8  -7   43.18    2.84
   6  -8  -7    8.25    1.28
  -6   8   7    6.29    1.14
   6   8  -7    7.58    1.26
   5  -8  -7   27.92    1.91
   5   8  -7   26.42    1.91
  -5   8   7   28.75    1.92
   4  -8  -7   44.18    2.36
   4   8  -7   41.74    2.38
  -4   8   7   39.56    2.28
   3  -8  -7   24.22    1.68
   3   8  -7   24.94    1.55
   3   8  -7   25.77    1.65
  -3   8   7   25.27    1.69
   2  -8  -7    3.31    0.78
   2   8  -7    3.65    0.77
   2   8  -7    3.70    0.78
  -2   8   7    3.61    0.85
   1  -8  -7   49.17    2.49
  -1   8   7   45.29    2.55
   1   8  -7   48.77    2.49
   0  -8  -7  171.72    7.33
   0   8   7  183.28    7.51
   0   8  -7  171.11    7.41
  -1  -8  -7   13.79    1.79
  -1   8  -7   11.94    1.34
   1   8   7   10.83    1.30
  -2  -8  -7   38.74    2.53
  -2   8  -7   39.84    2.56
  -3  -8  -7    1.02    1.15
  -3   8  -7    0.89    1.16
   7  -9  -7    9.21    1.42
   7   9  -7   11.37    1.60
  -7   9   7    9.39    1.44
   6  -9  -7    5.21    1.14
  -6   9   7    7.00    1.22
   6   9  -7    4.18    1.14
   5  -9  -7  227.36    9.50
   5   9  -7  221.12    9.47
  -5   9   7  228.22    9.45
   4  -9  -7    3.42    0.87
   4   9  -7    3.09    0.85
  -4   9   7    2.47    0.86
   3  -9  -7    4.03    0.87
   3   9  -7    2.62    0.79
   3   9  -7    3.56    0.75
  -3   9   7    3.85    0.86
   2  -9  -7   27.90    1.93
   2   9  -7   24.88    1.61
   2   9  -7   25.80    1.61
  -2   9   7   24.56    1.74
   1  -9  -7   17.14    1.42
  -1   9   7   18.57    1.58
   1   9  -7   19.53    1.51
   0  -9  -7    3.27    0.82
   0   9  -7    1.40    0.84
   0   9   7    2.15    0.84
  -1  -9  -7   81.21    3.80
   1   9   7   84.80    4.01
  -1   9  -7   80.47    3.97
  -2   9  -7   24.27    2.11
   2   9   7   27.83    2.14
  -3  -9  -7    1.40    1.16
  -3   9  -7    1.85    1.23
   7 -10  -7   97.89    4.84
   7  10  -7   97.48    4.89
  -7  10   7  105.06    4.88
   6 -10  -7   29.92    2.21
  -6  10   7   30.31    2.25
   6  10  -7   34.73    2.27
   5 -10  -7   35.44    2.22
  -5  10   7   36.48    2.25
   5  10  -7   34.72    2.23
   4 -10  -7    0.49    0.78
   4  10  -7    0.21    0.78
  -4  10   7    0.17    0.77
   3 -10  -7   42.58    2.37
   3  10  -7   39.23    2.27
   3  10  -7   43.59    2.18
  -3  10   7   44.42    2.39
   2 -10  -7    3.23    0.83
   2  10  -7    3.62    0.81
  -2  10   7    3.22    0.88
   2  10  -7    4.30    0.82
   1  10  -7   83.83    4.54
  -1  10   7   86.59    4.04
   0 -10  -7   28.00    1.91
   0  10  -7   32.25    2.03
   0  10   7   29.61    2.04
  -1 -10  -7    0.75    0.88
  -1  10  -7    0.22    0.88
   1  10   7    1.16    0.94
   2  10   7   43.61    2.76
  -2  10  -7   47.14    2.80
   7 -11  -7    0.38    1.08
   7  11  -7    0.34    1.18
  -7  11   7   -0.27    1.17
   6 -11  -7    0.01    0.91
   6  11  -7    0.05    0.98
  -6  11   7    0.45    1.04
   5 -11  -7   11.02    1.36
   5  11  -7   11.37    1.35
  -5  11   7   11.55    1.42
   4 -11  -7    1.30    0.85
   4  11  -7    2.43    0.90
  -4  11   7    2.34    0.95
   3 -11  -7  235.18    9.64
  -3  11   7  226.83    9.62
   3  11  -7  232.31    9.39
   3  11  -7  225.36    9.51
   2 -11  -7   27.10    1.82
   2  11  -7   28.04    1.79
   2  11  -7   27.71    1.77
  -2  11   7   29.97    1.94
   1 -11  -7   55.01    2.85
  -1  11   7   56.74    2.95
   0 -11  -7   31.28    2.26
   0  11  -7   34.60    2.16
   0  11   7   34.09    2.20
  -1  11  -7    4.89    1.14
   1  11   7    4.93    1.15
  -2  11  -7   14.48    1.65
   2  11   7   13.15    1.60
   7 -12  -7    6.37    1.44
  -7  12   7    7.61    1.64
   7  12  -7    4.65    1.42
   6 -12  -7   16.63    1.72
   6  12  -7   17.71    1.81
  -6  12   7   17.25    1.79
   5 -12  -7   47.10    2.74
   5  12  -7   49.99    2.77
  -5  12   7   46.15    2.79
   4 -12  -7    0.29    0.78
  -4  12   7    0.02    0.85
   4  12  -7    0.29    0.85
   3 -12  -7    8.51    1.20
  -3  12   7    7.10    1.10
   3  12  -7    8.38    1.13
   2 -12  -7   39.46    2.26
   2  12  -7   39.41    2.17
  -2  12   7   38.09    2.32
   2  12  -7   38.35    2.18
   1 -12  -7   53.33    2.81
  -1  12   7   53.67    2.87
   1  12  -7   50.81    2.80
   0 -12  -7    1.87    0.93
   0  12   7    1.75    0.95
   0  12  -7    0.49    0.91
  -1 -12  -7    4.73    1.16
   1  12   7    2.67    1.06
  -1  12  -7    6.13    1.23
   2  12   7    8.79    1.50
  -2  12  -7    8.48    1.45
   6 -13  -7    7.08    1.21
  -6  13   7    6.67    1.48
   6  13  -7    5.78    1.32
   5 -13  -7    6.66    1.23
   5  13  -7    7.90    1.34
  -5  13   7    9.34    1.41
   4 -13  -7   41.44    2.54
   4  13  -7   44.69    2.56
  -4  13   7   44.94    2.64
   3 -13  -7   17.19    1.61
  -3  13   7   18.33    1.67
   3  13  -7   15.34    1.47
   2 -13  -7    6.15    1.06
   2  13  -7    5.44    0.96
  -2  13   7    5.35    1.05
   2  13  -7    3.86    0.95
   1 -13  -7   52.16    2.82
   1  13  -7   52.16    2.73
  -1  13   7   49.59    2.81
   0 -13  -7    1.97    1.02
   0  13  -7    2.03    0.98
   0  13   7    2.10    0.98
  -1 -13  -7    0.41    1.04
   1  13   7    0.17    0.98
  -1  13  -7   -0.05    1.03
   2  13   7   74.96    3.92
  -2  13  -7   74.06    3.93
   6 -14  -7   13.34    1.64
   6  14  -7    9.86    1.51
  -6  14   7   12.26    1.80
   5 -14  -7   26.90    2.15
  -5  14   7   28.29    2.27
   5  14  -7   26.71    2.13
   4 -14  -7    9.57    1.32
   4  14  -7    7.38    1.24
  -4  14   7   11.77    1.47
   3 -14  -7   32.80    2.14
   3  14  -7   30.34    2.27
  -3  14   7   33.59    2.26
   2 -14  -7   18.41    1.64
   2  14  -7   16.48    1.41
  -2  14   7   12.57    1.44
   2  14  -7   15.05    1.52
   1 -14  -7   31.19    2.19
   1  14  -7   31.67    2.14
  -1  14   7   36.19    2.22
   0 -14  -7   25.42    2.08
   0  14   7   26.04    2.06
   0  14  -7   27.58    2.06
  -1 -14  -7   89.05    4.31
  -1  14  -7   85.82    4.31
   1  14   7   90.74    4.37
   2  14   7   34.19    2.57
  -2  14  -7   31.87    2.57
   6 -15  -7   36.54    2.61
  -6  15   7   40.68    2.98
   6  15  -7   39.25    2.72
   5 -15  -7   61.51    3.59
   5  15  -7   69.57    3.63
  -5  15   7   73.19    3.80
   4 -15  -7   12.55    1.48
   4  15  -7   12.26    1.47
  -4  15   7   13.47    1.60
   3 -15  -7    4.53    1.07
  -3  15   7    5.60    1.22
   3  15  -7    5.70    1.13
   2 -15  -7   13.64    1.53
  -2  15   7   12.62    1.51
   2  15  -7    8.48    1.21
   1 -15  -7   16.33    1.68
  -1  15   7   19.22    1.77
   1  15  -7   15.59    1.54
   0 -15  -7   59.35    3.21
   0  15  -7   56.82    3.13
   0  15   7   55.03    3.18
  -1 -15  -7   18.21    1.82
   1  15   7   15.36    1.69
  -1  15  -7   18.04    1.80
   5 -16  -7    0.81    1.03
   5  16  -7    0.39    1.15
  -5  16   7    0.49    1.18
   4 -16  -7   50.28    2.87
  -4  16   7   46.11    2.94
   4  16  -7   45.09    2.79
   3 -16  -7   28.32    2.10
  -3  16   7   29.22    2.27
   3  16  -7   28.04    2.12
   2 -16  -7   20.48    1.88
  -2  16   7   15.61    1.63
   1 -16  -7   19.97    1.88
  -1  16   7   21.21    1.88
   1  16  -7   23.23    1.96
   0 -16  -7   22.86    2.02
   0  16   7   19.36    1.87
   0  16  -7   20.19    1.85
  -1 -16  -7    5.24    1.46
   1  16   7    7.22    1.46
  -1  16  -7    6.27    1.44
   5 -17  -7   13.38    1.68
   5  17  -7   10.69    1.59
  -5  17   7    9.45    1.68
   4 -17  -7   24.63    2.09
   4  17  -7   20.95    1.94
  -4  17   7   21.83    2.06
   3 -17  -7   14.17    1.59
   3  17  -7   16.34    1.63
  -3  17   7   14.28    1.71
   2 -17  -7  139.81    6.32
  -2  17   7  136.02    6.27
   1 -17  -7    1.59    1.16
   1  17  -7    0.40    1.10
  -1  17   7    1.00    1.07
   0 -17  -7    0.94    1.15
   0  17   7    1.63    1.17
   0  17  -7    0.82    1.13
   1  17   7    7.16    1.50
  -1  17  -7    7.74    1.50
   5 -18  -7   25.08    2.19
  -5  18   7   22.49    2.29
   5  18  -7   16.37    1.93
   4 -18  -7   31.73    2.50
  -4  18   7   33.65    2.67
   4  18  -7   38.33    2.53
   3 -18  -7   -0.11    1.00
  -3  18   7    0.41    1.14
   3  18  -7   -0.27    1.19
   2 -18  -7    1.20    1.16
  -2  18   7    0.75    1.03
   1 -18  -7   33.84    2.58
   1  18  -7   39.82    2.55
  -1  18   7   33.02    2.53
   0 -18  -7    9.09    1.64
   0  18  -7    7.26    1.47
   0  18   7   10.15    1.60
   4 -19  -7   14.25    1.81
   4  19  -7   16.18    1.86
  -4  19   7   17.05    2.06
   3 -19  -7    9.87    1.58
   3  19  -7   11.19    1.61
  -3  19   7   13.36    1.79
   2 -19  -7    2.03    1.28
  -2  19   7    1.85    1.13
   1 -19  -7   27.14    2.36
  -1  19   7   25.24    2.21
   1  19  -7   19.25    2.15
   3 -20  -7   10.17    1.73
   3  20  -7   11.90    1.79
  -3  20   7   13.12    1.85
   2 -20  -7   -0.10    1.27
  -2  20   7    0.49    1.12
   7   0  -8    0.20    1.05
   6   0  -8   33.59    2.27
   5   0  -8   -0.60    0.81
  -5   0   8    0.17    0.78
   4   0  -8   97.90    4.41
  -4   0   8   91.59    4.28
  -3   0   8    0.09    0.76
  -2   0   8   98.94    4.60
   2   0  -8  104.26    4.56
   1   0  -8   -0.22    0.83
   0   0  -8    0.57    0.96
  -1   0  -8   -0.50    0.96
  -2   0  -8   14.90    1.76
   7  -1  -8   29.46    2.25
   7   1  -8   29.99    2.27
   6  -1  -8    0.44    0.94
   6   1  -8    0.04    0.92
   5  -1  -8    2.06    0.93
  -5  -1   8    1.77    0.86
  -5   1   8    1.71    0.85
   5   1  -8    1.42    0.91
  -4  -1   8   60.73    2.96
   4  -1  -8   58.31    3.06
   4   1  -8   59.33    3.07
  -3  -1   8   56.71    3.03
   3  -1  -8   57.39    2.99
  -3   1   8   56.70    2.91
   3   1  -8   62.99    3.34
   2  -1  -8    8.72    1.10
   2   1  -8    6.98    1.05
  -2   1   8    8.44    1.15
   1   1  -8   23.42    1.84
   0  -1  -8    8.31    1.30
   0   1  -8    9.96    1.34
  -1  -1  -8    0.53    1.01
  -1   1  -8    0.32    1.02
  -2  -1  -8    5.44    1.36
  -2   1  -8    7.17    1.40
   7  -2  -8    0.68    1.06
   7   2  -8    0.67    1.04
   6  -2  -8  106.51    4.93
   6   2  -8  101.98    4.89
   5  -2  -8   54.13    2.95
   5   2  -8   55.25    2.94
  -4  -2   8    7.46    1.06
   4  -2  -8    5.69    1.07
  -4   2   8    7.09    1.04
   4   2  -8    8.54    1.18
   3  -2  -8   18.05    1.52
   3   2  -8   15.21    1.45
   2  -2  -8   14.17    1.33
   2   2  -8   11.67    1.24
   2   2  -8   13.31    1.35
  -2   2   8   12.47    1.35
   1  -2  -8  103.18    4.53
  -1   2   8   96.43    4.64
   1   2  -8  105.69    4.70
   0  -2  -8    4.30    1.11
   0   2  -8    5.10    1.11
  -1  -2  -8   20.18    1.86
  -1   2  -8   17.45    1.78
  -2  -2  -8   15.05    1.72
  -2   2  -8   12.66    1.68
   7  -3  -8    0.56    1.04
   7   3  -8    0.18    1.05
   6  -3  -8    1.58    0.98
   6   3  -8    3.02    1.06
  -6   3   8    1.87    0.90
   5  -3  -8    8.56    1.22
  -5   3   8    7.49    1.09
   5   3  -8    6.76    1.19
   4  -3  -8    0.64    0.82
  -4  -3   8    1.18    0.84
   4   3  -8    0.69    0.85
  -4   3   8    0.94    0.78
   3  -3  -8   30.01    1.88
   3   3  -8   27.63    1.84
  -3   3   8   27.19    1.84
   2  -3  -8    7.94    1.07
   2   3  -8    5.97    1.09
   2   3  -8    7.92    1.05
  -2   3   8    8.20    1.15
   1  -3  -8   62.36    3.00
  -1   3   8   60.38    3.14
   1   3  -8   59.57    3.13
   0  -3  -8   63.41    3.42
   0   3  -8   69.51    3.42
  -1  -3  -8  186.44    8.03
  -1   3  -8  182.96    8.01
  -2  -3  -8    2.57    1.23
  -2   3  -8    3.16    1.22
   7  -4  -8   36.54    2.51
   7   4  -8   35.41    2.50
   6  -4  -8   55.55    3.02
   6   4  -8   52.68    2.99
  -6   4   8   52.59    2.79
   5  -4  -8   -0.48    0.82
  -5   4   8    0.53    0.81
   5   4  -8   -0.36    0.87
   4  -4  -8   89.66    4.33
   4   4  -8  100.90    4.24
  -4   4   8   86.95    4.24
   4   4  -8   95.95    4.34
   3  -4  -8    0.43    0.77
  -3   4   8    0.52    0.78
   3   4  -8    0.45    0.83
   3   4  -8    0.11    0.78
   2   4  -8   13.58    1.30
   2   4  -8   12.22    1.21
   1  -4  -8  107.97    4.76
  -1   4   8  100.78    4.86
   1   4  -8  113.63    4.89
   0   4   8    8.07    1.26
   0   4  -8    6.31    1.18
  -1  -4  -8   17.30    1.68
  -1   4  -8   17.47    1.72
  -2  -4  -8    6.02    1.38
  -2   4  -8    6.83    1.43
   7  -5  -8    1.79    1.11
   7   5  -8    2.80    1.26
   6  -5  -8   25.51    2.02
  -6   5   8   24.12    1.83
   6   5  -8   25.51    2.03
   5  -5  -8   32.84    2.19
   5   5  -8   34.57    2.20
  -5   5   8   32.68    2.06
   4  -5  -8   60.97    3.08
   4   5  -8   60.05    2.92
  -4   5   8   55.12    3.00
   4   5  -8   60.34    3.05
   3  -5  -8   55.61    2.90
   3   5  -8   56.72    2.86
   3   5  -8   57.77    2.86
  -3   5   8   54.20    2.87
   2  -5  -8   50.98    2.79
   2   5  -8   49.11    2.61
   2   5  -8   49.27    2.53
  -2   5   8   46.00    2.63
   1  -5  -8   24.58    1.68
  -1   5   8   22.27    1.87
   1   5  -8   23.87    1.81
   0   5  -8    3.79    1.07
   0   5   8    1.00    0.96
  -1  -5  -8   -0.29    1.03
  -1   5  -8    0.25    1.01
  -2  -5  -8    0.20    1.15
  -2   5  -8    0.73    1.21
   7  -6  -8    6.84    1.38
   7   6  -8    7.40    1.46
   6  -6  -8   14.81    1.62
   6   6  -8   12.00    1.50
  -6   6   8   13.37    1.40
   5  -6  -8    6.03    1.13
  -5   6   8    7.29    1.12
   5   6  -8    8.45    1.24
   4  -6  -8    5.98    1.12
  -4   6   8    8.01    1.15
   4   6  -8    7.38    1.14
   4   6  -8    8.34    1.18
   3  -6  -8  126.27    5.60
  -3   6   8  120.20    5.57
   3   6  -8  130.79    5.57
   3   6  -8  130.48    5.50
   2  -6  -8   53.43    2.65
   2   6  -8   44.43    2.60
   2   6  -8   50.99    2.66
  -2   6   8   51.59    2.75
   1  -6  -8    1.82    0.84
   1   6  -8    4.84    1.02
  -1   6   8    2.72    0.96
   0   6  -8    0.13    0.92
   0   6   8    1.70    1.01
  -1  -6  -8    1.94    1.13
  -1   6  -8    2.29    1.13
   7  -7  -8   53.59    3.18
   7   7  -8   55.86    3.25
   6  -7  -8    8.73    1.37
   6   7  -8    7.60    1.37
  -6   7   8    8.12    1.22
   5  -7  -8   42.43    2.50
   5   7  -8   38.64    2.46
  -5   7   8   39.70    2.37
   4  -7  -8    7.60    1.19
  -4   7   8    6.45    1.08
   4   7  -8    4.82    1.04
   3  -7  -8   16.27    1.52
   3   7  -8   18.08    1.55
  -3   7   8   19.29    1.65
   3   7  -8   19.93    1.56
   2  -7  -8   60.64    3.07
   2   7  -8   63.27    3.11
  -2   7   8   62.32    3.18
   1  -7  -8    0.54    1.03
   1   7  -8   -0.60    0.83
  -1   7   8    0.29    0.87
   0   7  -8   28.97    2.15
   0   7   8   34.36    2.26
  -1   7  -8    0.76    1.06
   6  -8  -8   11.80    1.51
  -6   8   8   14.46    1.53
   6   8  -8   13.93    1.63
   5  -8  -8  106.07    4.86
  -5   8   8   97.78    4.72
   5   8  -8  106.09    4.83
   4  -8  -8   19.52    1.69
  -4   8   8   23.72    1.78
   4   8  -8   22.02    1.78
   3  -8  -8    2.91    0.88
   3   8  -8    3.34    1.07
  -3   8   8    4.56    1.05
   3   8  -8    2.31    0.87
   2  -8  -8    9.51    1.21
   2   8  -8   10.96    1.20
  -2   8   8    9.36    1.27
   1  -8  -8    0.22    0.80
  -1   8   8   -0.31    0.85
   1   8  -8    0.71    0.86
   0   8   8   16.68    1.69
   0   8  -8   16.92    1.63
  -1   8  -8   -0.12    1.08
   1   8   8    0.42    1.05
   6  -9  -8    2.85    1.13
  -6   9   8    2.92    1.12
   6   9  -8    3.01    1.17
   5  -9  -8    1.92    0.99
  -5   9   8    0.95    0.93
   5   9  -8    0.90    0.96
   4  -9  -8    0.51    0.81
  -4   9   8    0.19    0.82
   4   9  -8    0.36    0.89
   3  -9  -8    3.93    0.96
   3   9  -8    2.70    0.90
  -3   9   8    4.06    1.01
   2  -9  -8    4.44    1.01
  -2   9   8    6.24    1.12
   2   9  -8    5.06    1.03
   1  -9  -8    5.39    1.06
   1   9  -8    3.06    1.00
  -1   9   8    3.61    1.06
   0   9  -8  209.36    9.07
   0   9   8  218.20    9.14
  -1   9  -8    2.55    1.24
   1   9   8    4.51    1.25
   6 -10  -8   -0.53    1.03
  -6  10   8    0.21    1.08
   6  10  -8   -0.26    1.12
   5 -10  -8   38.45    2.46
   5  10  -8   37.40    2.44
  -5  10   8   39.31    2.45
   4 -10  -8   36.81    2.32
   4  10  -8   38.76    2.35
  -4  10   8   36.67    2.33
   3 -10  -8   17.99    1.64
   3  10  -8   17.27    1.73
  -3  10   8   16.95    1.61
   3  10  -8   15.26    1.59
   2 -10  -8   59.74    3.10
  -2  10   8   60.86    3.19
   2  10  -8   59.57    3.06
   1 -10  -8   10.25    1.31
   1  10  -8   10.48    1.32
  -1  10   8    9.82    1.37
   0 -10  -8   30.28    2.11
   0  10   8   29.33    2.25
   0  10  -8   31.89    2.31
  -1  10  -8    4.47    1.28
   1  10   8    5.79    1.33
   6 -11  -8   25.72    2.23
   6  11  -8   23.87    2.18
  -6  11   8   29.51    2.33
   5 -11  -8    7.89    1.25
   5  11  -8    7.18    1.32
  -5  11   8    7.73    1.29
   4 -11  -8   21.60    1.86
   4  11  -8   25.18    1.96
  -4  11   8   25.57    1.97
   3 -11  -8   11.11    1.39
  -3  11   8    9.71    1.34
   3  11  -8    9.58    1.30
   2 -11  -8  137.21    5.97
   2  11  -8  137.57    5.91
  -2  11   8  128.60    6.01
   1 -11  -8   -0.11    0.90
  -1  11   8   -0.02    0.96
   1  11  -8   -0.32    0.97
   0 -11  -8   11.58    1.35
   0  11  -8    8.60    1.39
   0  11   8    9.29    1.41
   5 -12  -8    0.89    0.97
  -5  12   8    0.67    1.08
   5  12  -8    0.24    1.08
   4 -12  -8   60.79    3.24
  -4  12   8   58.14    3.22
   4  12  -8   59.57    3.20
   3 -12  -8   81.92    3.92
  -3  12   8   79.17    3.96
   3  12  -8   77.03    3.84
   2 -12  -8    1.39    0.95
  -2  12   8    1.18    0.97
   2  12  -8    1.63    0.98
   1 -12  -8   18.10    1.66
   1  12  -8   18.35    1.68
  -1  12   8   17.40    1.73
   0 -12  -8    5.76    1.20
   0  12  -8    4.91    1.27
   0  12   8    5.97    1.28
   5 -13  -8   32.34    2.33
  -5  13   8   31.59    2.47
   5  13  -8   30.63    2.40
   4 -13  -8    7.77    1.36
   4  13  -8    4.67    1.25
  -4  13   8    6.89    1.29
   3 -13  -8    0.18    0.91
   3  13  -8    0.04    1.18
  -3  13   8    0.56    0.97
   2 -13  -8    7.03    1.24
  -2  13   8    8.99    1.41
   2  13  -8    7.90    1.27
   1 -13  -8   43.77    2.58
   1  13  -8   42.02    2.61
  -1  13   8   39.54    2.65
   0 -13  -8   17.88    1.70
   0  13   8   15.00    1.71
   0  13  -8   15.39    1.71
   5 -14  -8   42.71    2.76
  -5  14   8   45.28    2.95
   5  14  -8   43.40    2.85
   4 -14  -8   19.72    1.87
  -4  14   8   24.99    2.12
   4  14  -8   18.34    1.84
   3 -14  -8    9.59    1.41
  -3  14   8    4.91    1.20
   2 -14  -8    0.49    1.02
  -2  14   8    0.53    1.03
   1 -14  -8   10.26    1.42
   1  14  -8    6.83    1.33
  -1  14   8    8.21    1.38
   4 -15  -8   10.27    1.52
  -4  15   8    8.15    1.42
   4  15  -8    8.09    1.43
   3 -15  -8    0.59    1.06
  -3  15   8    0.81    1.07
   2 -15  -8    1.49    1.07
  -2  15   8    0.42    1.04
   1 -15  -8   13.67    1.65
  -1  15   8   17.55    1.86
   1  15  -8   14.64    1.66
   3 -16  -8   15.00    1.73
  -3  16   8   14.18    1.79
   2 -16  -8   49.04    2.95
  -2  16   8   46.69    3.01
   5   0  -9   10.29    1.45
  -4   0   9   -0.13    0.95
   4   0  -9   -0.17    0.98
  -3   0   9  482.19   19.64
   3   0  -9  491.42   19.68
   2   0  -9    0.01    1.00
   1   0  -9   11.02    1.52
   0   0  -9    0.28    1.19
   5  -1  -9   93.27    4.48
  -5   1   9   92.19    4.31
   5   1  -9   88.94    4.43
   4  -1  -9   14.74    1.59
  -4  -1   9   13.52    1.50
   4   1  -9   11.19    1.48
  -4   1   9   13.35    1.46
   3  -1  -9    1.31    1.01
   3   1  -9    2.33    1.06
   3   1  -9    0.90    1.06
  -3   1   9   -0.09    1.00
   2   1  -9   15.48    1.67
   1  -1  -9   69.23    3.64
   1   1  -9   67.09    3.64
   0  -1  -9    0.84    1.17
   0   1  -9   -0.38    1.11
   5  -2  -9   24.08    2.04
   5   2  -9   24.63    2.09
  -5   2   9   24.21    1.93
   4  -2  -9    1.05    1.01
   4   2  -9    0.18    0.97
  -4   2   9    1.13    1.00
   3  -2  -9    0.99    0.99
   3   2  -9    0.50    0.98
  -3   2   9   -0.40    0.90
   3   2  -9    0.66    1.04
   2   2  -9    3.74    1.17
  -2   2   9    3.46    1.14
   1  -2  -9   61.84    3.44
   1   2  -9   64.77    3.47
   0  -2  -9   19.42    1.90
   0   2  -9   16.64    1.79
   5  -3  -9    6.17    1.24
   5   3  -9    7.96    1.39
  -5   3   9    6.80    1.19
   4  -3  -9   16.83    1.67
  -4   3   9   16.04    1.57
   4   3  -9   16.16    1.58
   4   3  -9   15.77    1.66
   3  -3  -9    7.69    1.28
   3   3  -9    6.91    1.29
  -3   3   9    7.65    1.26
   3   3  -9    8.22    1.32
   2  -3  -9    0.38    1.00
   2   3  -9    1.44    1.12
  -2   3   9    1.24    1.05
   1  -3  -9   -0.28    1.07
   1   3  -9    0.53    1.07
   5  -4  -9    4.12    1.16
   5   4  -9    3.71    1.20
  -5   4   9    5.02    1.11
   4  -4  -9   11.27    1.42
   4   4  -9   13.73    1.54
  -4   4   9   10.30    1.39
   4   4  -9   11.60    1.49
   3  -4  -9    3.55    1.07
   3   4  -9    3.43    1.13
   3   4  -9    4.13    1.16
  -3   4   9    3.07    1.10
   2  -4  -9   17.25    1.61
  -2   4   9   18.74    1.74
   2   4  -9   15.31    1.61
  -1   4   9   19.45    1.84
   1   4  -9   18.99    1.82
   5  -5  -9    1.15    1.08
   5   5  -9    0.97    1.07
  -5   5   9    1.11    1.02
   4  -5  -9   40.99    2.57
   4   5  -9   42.86    2.59
  -4   5   9   42.24    2.53
   3  -5  -9    4.97    1.14
   3   5  -9    6.03    1.20
  -3   5   9    5.02    1.13
   2  -5  -9   21.44    1.87
   2   5  -9   25.14    1.99
  -2   5   9   22.37    1.93
  -1   5   9   43.74    2.72
   1   5  -9   42.95    2.78
   5  -6  -9    0.12    1.03
   5   6  -9    0.33    1.07
  -5   6   9   -0.49    0.98
   4  -6  -9   48.37    2.89
   4   6  -9   57.14    3.01
  -4   6   9   50.97    2.91
   3  -6  -9   87.20    4.22
  -3   6   9   83.37    4.21
   3   6  -9   92.53    4.21
   2  -6  -9   82.80    4.18
  -2   6   9   88.11    4.31
   2   6  -9   93.93    4.30
   1   6  -9    2.28    1.17
  -1   6   9    3.23    1.24
   5  -7  -9   71.51    3.72
   5   7  -9   67.97    3.70
  -5   7   9   73.65    3.69
   4  -7  -9   35.17    2.35
  -4   7   9   33.32    2.34
   4   7  -9   33.86    2.38
   3  -7  -9    6.89    1.24
  -3   7   9    9.38    1.39
   3   7  -9    8.56    1.33
   2  -7  -9   51.05    2.83
   2   7  -9   54.02    2.93
  -2   7   9   47.25    2.93
   1   7  -9   25.84    2.11
  -1   7   9   19.26    1.91
   4  -8  -9    1.06    1.02
  -4   8   9    1.93    1.09
   4   8  -9    3.34    1.21
   3  -8  -9    2.62    1.04
  -3   8   9    2.47    1.11
   3   8  -9    1.91    1.16
   2  -8  -9    3.43    1.07
   2   8  -9    3.86    1.17
  -2   8   9    3.01    1.15
   4  -9  -9    4.82    1.20
  -4   9   9    3.02    1.16
   4   9  -9    4.14    1.28
   3  -9  -9    8.47    1.31
  -3   9   9    4.66    1.22
   2  -9  -9   21.52    1.89
  -2   9   9   23.46    2.00
   2   9  -9   21.56    1.86
   3 -10  -9    3.46    1.14
  -3  10   9    4.16    1.21
   0   0   0    0.00    0.00
;
_shelx_hkl_checksum    2066
