# Supplementary material for: How the Position of Substitution Affects Intermolecular Bonding in Halogen Derivatives of Carboranes: Crystal Structures of 1,2,3- and 8,9,12-Triiodo- and 8,9,12-Tribromo ortho-Carboranes
Source: Molecules. 2023 Jan 15;28(2):875. doi: 10.3390/molecules28020875 (PMC9865681; doi:10.3390/molecules28020875)
Supplement: Supplementary file 1 [file molecules-28-00875-s001.zip › siv42.cif]

 
data_siv42
 
_audit_creation_method            SHELXL-2014/6
_chemical_name_systematic         ?
_chemical_name_common             ?
_chemical_melting_point           ?
_chemical_formula_moiety          
 'C2 H9 B10 I3' 
_chemical_formula_sum
 'C2 H9 B10 I3' 
_chemical_formula_weight          521.89

loop_
 _atom_type_symbol
 _atom_type_description
 _atom_type_scat_dispersion_real
 _atom_type_scat_dispersion_imag
 _atom_type_scat_source
 'C'  'C'   0.0033   0.0016
 'International Tables Vol C Tables 4.2.6.8 and 6.1.1.4'
 'H'  'H'   0.0000   0.0000
 'International Tables Vol C Tables 4.2.6.8 and 6.1.1.4'
 'B'  'B'   0.0013   0.0007
 'International Tables Vol C Tables 4.2.6.8 and 6.1.1.4'
 'I'  'I'  -0.4742   1.8119
 'International Tables Vol C Tables 4.2.6.8 and 6.1.1.4'
 
_space_group_crystal_system       orthorhombic
_space_group_IT_number            62
_space_group_name_H-M_alt         'P n m a'
_space_group_name_Hall            '-P 2ac 2n'
 
_shelx_space_group_comment
;
The symmetry employed for this shelxl refinement is uniquely defined
by the following loop, which should always be used as a source of
symmetry information in preference to the above space-group names.
They are only intended as comments.
;
 
loop_
 _space_group_symop_operation_xyz
 'x, y, z'
 '-x+1/2, -y, z+1/2'
 '-x, y+1/2, -z'
 'x+1/2, -y+1/2, -z+1/2'
 '-x, -y, -z'
 'x-1/2, y, -z-1/2'
 'x, -y-1/2, z'
 '-x-1/2, y-1/2, z-1/2'
 
_cell_length_a                    19.1157(8)
_cell_length_b                    8.0014(3)
_cell_length_c                    8.7287(4)
_cell_angle_alpha                 90
_cell_angle_beta                  90
_cell_angle_gamma                 90
_cell_volume                      1335.08(10)
_cell_formula_units_Z             4
_cell_measurement_temperature     120(2)
_cell_measurement_reflns_used     9996
_cell_measurement_theta_min       2.56
_cell_measurement_theta_max       28.04
 
_exptl_crystal_description        'prizm'
_exptl_crystal_colour             'colorless'
_exptl_crystal_density_meas       ?
_exptl_crystal_density_method     ?
_exptl_crystal_density_diffrn     2.596          
_exptl_crystal_F_000              920
_exptl_transmission_factor_min    ?
_exptl_transmission_factor_max    ?
_exptl_crystal_size_max           0.22
_exptl_crystal_size_mid           0.16
_exptl_crystal_size_min           0.14
_exptl_absorpt_coefficient_mu     6.976
_shelx_estimated_absorpt_T_min    ?
_shelx_estimated_absorpt_T_max    ?
_exptl_absorpt_correction_type    'multi-scan'
_exptl_absorpt_correction_T_min   0.229
_exptl_absorpt_correction_T_max   0.377
_exptl_absorpt_process_details    'SADABS-2014/5 (Bruker,2014/5)' 
_exptl_absorpt_special_details    ?
_diffrn_ambient_temperature       120(2)
_diffrn_radiation_wavelength      0.71073
_diffrn_radiation_type            MoK\a
_diffrn_source                    'sealed tube'
_diffrn_measurement_device_type   'Bruker APEX-II CCD' 
_diffrn_measurement_method        '\f and \w scans' 
_diffrn_detector_area_resol_mean  ?
_diffrn_reflns_number             24763
_diffrn_reflns_av_unetI/netI      0.0132
_diffrn_reflns_av_R_equivalents   0.0313
_diffrn_reflns_limit_h_min        -25
_diffrn_reflns_limit_h_max        25
_diffrn_reflns_limit_k_min        -10
_diffrn_reflns_limit_k_max        10
_diffrn_reflns_limit_l_min        -11
_diffrn_reflns_limit_l_max        11
_diffrn_reflns_theta_min          2.565
_diffrn_reflns_theta_max          28.101
_diffrn_reflns_theta_full         25.242
_diffrn_measured_fraction_theta_max   0.997
_diffrn_measured_fraction_theta_full  0.996
_diffrn_reflns_Laue_measured_fraction_max    0.997
_diffrn_reflns_Laue_measured_fraction_full   0.996
_diffrn_reflns_point_group_measured_fraction_max   0.997
_diffrn_reflns_point_group_measured_fraction_full  0.996
_reflns_number_total              1739
_reflns_number_gt                 1613
_reflns_threshold_expression      'I > 2\s(I)'
_reflns_Friedel_coverage          0.000
_reflns_Friedel_fraction_max      .
_reflns_Friedel_fraction_full     .
 
_reflns_special_details
;
 Reflections were merged by SHELXL according to the crystal
 class for the calculation of statistics and refinement.
 
 _reflns_Friedel_fraction is defined as the number of unique
 Friedel pairs measured divided by the number that would be
 possible theoretically, ignoring centric projections and
 systematic absences.
;
 
_computing_data_collection        'APEX (Bruker, 2014)' 
_computing_cell_refinement        'SAINT (Bruker, 2014)' 
_computing_data_reduction         'SAINT (Bruker, 2014)'
_computing_structure_solution   'SHELXL-2014/6 (Sheldrick, 2014)'
_computing_structure_refinement 'SHELXL-2014/6 (Sheldrick, 2014)'
_computing_molecular_graphics   'SHELXL-2014/6 (Sheldrick, 2014)'
_computing_publication_material   
'SHELXL-2014/6 (Sheldrick, 2014) and PLATON (Spek, 2015)'
_refine_special_details           ?
_refine_ls_structure_factor_coef  Fsqd
_refine_ls_matrix_type            full
_refine_ls_weighting_scheme       calc
_refine_ls_weighting_details
'w=1/[\s^2^(Fo^2^)+(0.0273P)^2^+4.5676P] where P=(Fo^2^+2Fc^2^)/3'
_atom_sites_solution_primary      direct
_atom_sites_solution_secondary    difmap
_atom_sites_solution_hydrogens    geom
_refine_ls_hydrogen_treatment     constr
_refine_ls_extinction_method      none
_refine_ls_extinction_coef        .
_refine_ls_number_reflns          1739
_refine_ls_number_parameters      76
_refine_ls_number_restraints      0
_refine_ls_R_factor_all           0.0254
_refine_ls_R_factor_gt            0.0224
_refine_ls_wR_factor_ref          0.0580
_refine_ls_wR_factor_gt           0.0572
_refine_ls_goodness_of_fit_ref    1.143
_refine_ls_restrained_S_all       1.143
_refine_ls_shift/su_max           0.001
_refine_ls_shift/su_mean          0.000
 
loop_
 _atom_site_label
 _atom_site_type_symbol
 _atom_site_fract_x
 _atom_site_fract_y
 _atom_site_fract_z
 _atom_site_U_iso_or_equiv
 _atom_site_adp_type
 _atom_site_occupancy
 _atom_site_site_symmetry_order  
 _atom_site_calc_flag
 _atom_site_refinement_flags_posn
 _atom_site_refinement_flags_adp
 _atom_site_refinement_flags_occupancy
 _atom_site_disorder_assembly
 _atom_site_disorder_group
I1 I 0.14443(2) 0.01328(3) 0.57404(3) 0.02032(9) Uani 1 1 d . . . . .
I2 I 0.29345(2) 0.2500 0.37247(4) 0.01518(9) Uani 1 2 d S T P . .
C1 C 0.12140(18) 0.1447(4) 0.3716(4) 0.0147(6) Uani 1 1 d . . . . .
B3 B 0.1885(3) 0.2500 0.2808(6) 0.0140(10) Uani 1 2 d S T P . .
B4 B 0.1496(2) 0.0698(6) 0.1996(5) 0.0192(8) Uani 1 1 d . . . . .
H4 H 0.1798 -0.0491 0.1851 0.023 Uiso 1 1 calc R U . . .
B5 B 0.0587(2) 0.0686(5) 0.2496(5) 0.0188(8) Uani 1 1 d . . . . .
H5 H 0.0291 -0.0507 0.2671 0.023 Uiso 1 1 calc R U . . .
B6 B 0.0422(3) 0.2500 0.3634(7) 0.0154(11) Uani 1 2 d S T P . .
H6 H 0.0024 0.2500 0.4576 0.018 Uiso 1 2 calc R U P . .
B8 B 0.1657(3) 0.2500 0.0840(6) 0.0173(11) Uani 1 2 d S T P . .
H8 H 0.2061 0.2500 -0.0090 0.021 Uiso 1 2 calc R U P . .
B9 B 0.0855(2) 0.1384(6) 0.0654(5) 0.0223(9) Uani 1 1 d . . . . .
H9 H 0.0731 0.0647 -0.0402 0.027 Uiso 1 1 calc R U . . .
B10 B 0.0196(3) 0.2500 0.1683(7) 0.0190(11) Uani 1 2 d S T P . .
H10 H -0.0365 0.2500 0.1309 0.023 Uiso 1 2 calc R U P . .
 
loop_
 _atom_site_aniso_label
 _atom_site_aniso_U_11
 _atom_site_aniso_U_22
 _atom_site_aniso_U_33
 _atom_site_aniso_U_23
 _atom_site_aniso_U_13
 _atom_site_aniso_U_12
I1 0.01656(13) 0.02286(14) 0.02154(14) 0.00728(9) 0.00051(8) -0.00056(9)
I2 0.00869(14) 0.02281(18) 0.01405(15) 0.000 -0.00118(11) 0.000
C1 0.0134(14) 0.0136(16) 0.0172(16) 0.0004(13) 0.0002(13) -0.0002(13)
B3 0.008(2) 0.020(3) 0.015(2) 0.000 0.0005(19) 0.000
B4 0.0153(18) 0.025(2) 0.018(2) -0.0060(17) 0.0002(14) 0.0000(16)
B5 0.0116(16) 0.0213(19) 0.024(2) -0.0038(17) -0.0022(15) -0.0012(15)
B6 0.010(2) 0.018(3) 0.019(3) 0.000 0.001(2) 0.000
B8 0.010(2) 0.029(3) 0.013(3) 0.000 -0.0023(19) 0.000
B9 0.0144(17) 0.034(2) 0.0191(19) -0.0063(18) -0.0032(15) -0.0015(17)
B10 0.010(2) 0.028(3) 0.019(3) 0.000 -0.002(2) 0.000
 
_geom_special_details
;
 All esds (except the esd in the dihedral angle between two l.s. planes)
 are estimated using the full covariance matrix.  The cell esds are taken
 into account individually in the estimation of esds in distances, angles
 and torsion angles; correlations between esds in cell parameters are only
 used when they are defined by crystal symmetry.  An approximate (isotropic)
 treatment of cell esds is used for estimating esds involving l.s. planes.
;
 
loop_
 _geom_bond_atom_site_label_1
 _geom_bond_atom_site_label_2
 _geom_bond_distance
 _geom_bond_site_symmetry_2
 _geom_bond_publ_flag
I1 C1 2.103(4) . ?
I2 B3 2.160(5) . ?
C1 C1 1.685(7) 7_565 ?
C1 B4 1.704(5) . ?
C1 B5 1.715(5) . ?
C1 B3 1.727(6) . ?
C1 B6 1.733(6) . ?
B3 C1 1.727(6) 7_565 ?
B3 B4 1.770(5) 7_565 ?
B3 B4 1.770(5) . ?
B3 B8 1.772(8) . ?
B4 B9 1.781(6) . ?
B4 B8 1.787(6) . ?
B4 B5 1.792(6) . ?
B4 H4 1.1200 . ?
B5 B9 1.777(6) . ?
B5 B10 1.780(5) . ?
B5 B6 1.787(5) . ?
B5 H5 1.1200 . ?
B6 C1 1.733(6) 7_565 ?
B6 B10 1.757(8) . ?
B6 B5 1.787(5) 7_565 ?
B6 H6 1.1200 . ?
B8 B9 1.783(6) 7_565 ?
B8 B9 1.783(6) . ?
B8 B4 1.787(6) 7_565 ?
B8 H8 1.1200 . ?
B9 B9 1.786(10) 7_565 ?
B9 B10 1.786(7) . ?
B9 H9 1.1200 . ?
B10 B5 1.780(5) 7_565 ?
B10 B9 1.786(7) 7_565 ?
B10 H10 1.1200 . ?
 
loop_
 _geom_angle_atom_site_label_1
 _geom_angle_atom_site_label_2
 _geom_angle_atom_site_label_3
 _geom_angle
 _geom_angle_site_symmetry_1
 _geom_angle_site_symmetry_3
 _geom_angle_publ_flag
C1 C1 B4 110.6(2) 7_565 . ?
C1 C1 B5 110.78(19) 7_565 . ?
B4 C1 B5 63.2(2) . . ?
C1 C1 B3 60.79(14) 7_565 . ?
B4 C1 B3 62.1(2) . . ?
B5 C1 B3 114.0(3) . . ?
C1 C1 B6 60.91(14) 7_565 . ?
B4 C1 B6 114.3(3) . . ?
B5 C1 B6 62.4(2) . . ?
B3 C1 B6 113.1(3) . . ?
C1 C1 I1 119.99(10) 7_565 . ?
B4 C1 I1 119.9(2) . . ?
B5 C1 I1 119.4(2) . . ?
B3 C1 I1 118.3(2) . . ?
B6 C1 I1 117.4(3) . . ?
C1 B3 C1 58.4(3) . 7_565 ?
C1 B3 B4 105.6(3) . 7_565 ?
C1 B3 B4 58.3(2) 7_565 7_565 ?
C1 B3 B4 58.3(2) . . ?
C1 B3 B4 105.6(3) 7_565 . ?
B4 B3 B4 109.0(4) 7_565 . ?
C1 B3 B8 105.2(3) . . ?
C1 B3 B8 105.2(3) 7_565 . ?
B4 B3 B8 60.6(2) 7_565 . ?
B4 B3 B8 60.6(2) . . ?
C1 B3 I2 121.3(3) . . ?
C1 B3 I2 121.3(3) 7_565 . ?
B4 B3 I2 122.6(2) 7_565 . ?
B4 B3 I2 122.6(2) . . ?
B8 B3 I2 125.9(3) . . ?
C1 B4 B3 59.6(3) . . ?
C1 B4 B9 104.7(3) . . ?
B3 B4 B9 107.5(3) . . ?
C1 B4 B8 105.6(3) . . ?
B3 B4 B8 59.8(3) . . ?
B9 B4 B8 59.9(3) . . ?
C1 B4 B5 58.7(2) . . ?
B3 B4 B5 108.3(3) . . ?
B9 B4 B5 59.6(2) . . ?
B8 B4 B5 108.0(3) . . ?
C1 B4 H4 124.1 . . ?
B3 B4 H4 121.4 . . ?
B9 B4 H4 122.8 . . ?
B8 B4 H4 122.2 . . ?
B5 B4 H4 121.5 . . ?
C1 B5 B9 104.4(3) . . ?
C1 B5 B10 104.6(3) . . ?
B9 B5 B10 60.3(3) . . ?
C1 B5 B6 59.3(2) . . ?
B9 B5 B6 107.4(3) . . ?
B10 B5 B6 59.0(3) . . ?
C1 B5 B4 58.1(2) . . ?
B9 B5 B4 59.9(2) . . ?
B10 B5 B4 107.8(3) . . ?
B6 B5 B4 107.6(3) . . ?
C1 B5 H5 124.8 . . ?
B9 B5 H5 122.5 . . ?
B10 B5 H5 122.6 . . ?
B6 B5 H5 121.9 . . ?
B4 B5 H5 121.8 . . ?
C1 B6 C1 58.2(3) 7_565 . ?
C1 B6 B10 104.8(3) 7_565 . ?
C1 B6 B10 104.8(3) . . ?
C1 B6 B5 58.3(2) 7_565 7_565 ?
C1 B6 B5 105.3(3) . 7_565 ?
B10 B6 B5 60.3(2) . 7_565 ?
C1 B6 B5 105.3(3) 7_565 . ?
C1 B6 B5 58.3(2) . . ?
B10 B6 B5 60.3(2) . . ?
B5 B6 B5 108.6(4) 7_565 . ?
C1 B6 H6 124.3 7_565 . ?
C1 B6 H6 124.3 . . ?
B10 B6 H6 122.9 . . ?
B5 B6 H6 121.8 7_565 . ?
B5 B6 H6 121.8 . . ?
B3 B8 B9 107.4(3) . 7_565 ?
B3 B8 B9 107.4(3) . . ?
B9 B8 B9 60.1(4) 7_565 . ?
B3 B8 B4 59.7(2) . 7_565 ?
B9 B8 B4 59.9(2) 7_565 7_565 ?
B9 B8 B4 107.9(3) . 7_565 ?
B3 B8 B4 59.7(2) . . ?
B9 B8 B4 107.9(3) 7_565 . ?
B9 B8 B4 59.9(2) . . ?
B4 B8 B4 107.6(4) 7_565 . ?
B3 B8 H8 122.3 . . ?
B9 B8 H8 121.8 7_565 . ?
B9 B8 H8 121.8 . . ?
B4 B8 H8 121.9 7_565 . ?
B4 B8 H8 121.9 . . ?
B5 B9 B4 60.5(2) . . ?
B5 B9 B8 108.9(3) . . ?
B4 B9 B8 60.2(2) . . ?
B5 B9 B9 108.3(2) . 7_565 ?
B4 B9 B9 107.9(2) . 7_565 ?
B8 B9 B9 59.94(18) . 7_565 ?
B5 B9 B10 59.9(2) . . ?
B4 B9 B10 108.0(3) . . ?
B8 B9 B10 108.1(3) . . ?
B9 B9 B10 60.00(18) 7_565 . ?
B5 B9 H9 121.2 . . ?
B4 B9 H9 121.7 . . ?
B8 B9 H9 121.4 . . ?
B9 B9 H9 121.8 7_565 . ?
B10 B9 H9 121.8 . . ?
B6 B10 B5 60.7(2) . 7_565 ?
B6 B10 B5 60.7(2) . . ?
B5 B10 B5 109.2(4) 7_565 . ?
B6 B10 B9 108.3(3) . 7_565 ?
B5 B10 B9 59.8(2) 7_565 7_565 ?
B5 B10 B9 108.2(3) . 7_565 ?
B6 B10 B9 108.3(3) . . ?
B5 B10 B9 108.2(3) 7_565 . ?
B5 B10 B9 59.8(2) . . ?
B9 B10 B9 60.0(4) 7_565 . ?
B6 B10 H10 121.2 . . ?
B5 B10 H10 121.2 7_565 . ?
B5 B10 H10 121.2 . . ?
B9 B10 H10 121.9 7_565 . ?
B9 B10 H10 121.9 . . ?
 
loop_
 _geom_torsion_atom_site_label_1
 _geom_torsion_atom_site_label_2
 _geom_torsion_atom_site_label_3
 _geom_torsion_atom_site_label_4
 _geom_torsion
 _geom_torsion_site_symmetry_1
 _geom_torsion_site_symmetry_2
 _geom_torsion_site_symmetry_3
 _geom_torsion_site_symmetry_4
 _geom_torsion_publ_flag
B4 C1 B3 C1 138.7(2) . . . 7_565 ?
B5 C1 B3 C1 101.3(3) . . . 7_565 ?
B6 C1 B3 C1 32.5(3) . . . 7_565 ?
I1 C1 B3 C1 -110.46(18) . . . 7_565 ?
C1 C1 B3 B4 -35.67(19) 7_565 . . 7_565 ?
B4 C1 B3 B4 103.0(4) . . . 7_565 ?
B5 C1 B3 B4 65.6(4) . . . 7_565 ?
B6 C1 B3 B4 -3.2(4) . . . 7_565 ?
I1 C1 B3 B4 -146.1(3) . . . 7_565 ?
C1 C1 B3 B4 -138.7(2) 7_565 . . . ?
B5 C1 B3 B4 -37.4(3) . . . . ?
B6 C1 B3 B4 -106.2(3) . . . . ?
I1 C1 B3 B4 110.8(3) . . . . ?
C1 C1 B3 B8 -98.8(2) 7_565 . . . ?
B4 C1 B3 B8 39.9(2) . . . . ?
B5 C1 B3 B8 2.5(3) . . . . ?
B6 C1 B3 B8 -66.3(3) . . . . ?
I1 C1 B3 B8 150.8(2) . . . . ?
C1 C1 B3 I2 109.9(3) 7_565 . . . ?
B4 C1 B3 I2 -111.4(2) . . . . ?
B5 C1 B3 I2 -148.8(2) . . . . ?
B6 C1 B3 I2 142.4(2) . . . . ?
I1 C1 B3 I2 -0.6(3) . . . . ?
C1 C1 B4 B3 38.0(2) 7_565 . . . ?
B5 C1 B4 B3 141.6(3) . . . . ?
B6 C1 B4 B3 104.4(3) . . . . ?
I1 C1 B4 B3 -108.3(3) . . . . ?
C1 C1 B4 B9 -64.0(3) 7_565 . . . ?
B5 C1 B4 B9 39.6(3) . . . . ?
B3 C1 B4 B9 -102.0(3) . . . . ?
B6 C1 B4 B9 2.4(4) . . . . ?
I1 C1 B4 B9 149.7(3) . . . . ?
C1 C1 B4 B8 -1.7(3) 7_565 . . . ?
B5 C1 B4 B8 101.9(3) . . . . ?
B3 C1 B4 B8 -39.6(3) . . . . ?
B6 C1 B4 B8 64.7(4) . . . . ?
I1 C1 B4 B8 -148.0(3) . . . . ?
C1 C1 B4 B5 -103.6(2) 7_565 . . . ?
B3 C1 B4 B5 -141.6(3) . . . . ?
B6 C1 B4 B5 -37.2(3) . . . . ?
I1 C1 B4 B5 110.1(3) . . . . ?
C1 B3 B4 C1 -35.7(3) 7_565 . . . ?
B4 B3 B4 C1 -97.0(4) 7_565 . . . ?
B8 B3 B4 C1 -134.7(3) . . . . ?
I2 B3 B4 C1 109.3(4) . . . . ?
C1 B3 B4 B9 97.0(3) . . . . ?
C1 B3 B4 B9 61.3(4) 7_565 . . . ?
B4 B3 B4 B9 0.0(5) 7_565 . . . ?
B8 B3 B4 B9 -37.6(3) . . . . ?
I2 B3 B4 B9 -153.7(3) . . . . ?
C1 B3 B4 B8 134.7(3) . . . . ?
C1 B3 B4 B8 98.9(3) 7_565 . . . ?
B4 B3 B4 B8 37.7(4) 7_565 . . . ?
I2 B3 B4 B8 -116.0(4) . . . . ?
C1 B3 B4 B5 34.0(3) . . . . ?
C1 B3 B4 B5 -1.7(4) 7_565 . . . ?
B4 B3 B4 B5 -63.0(5) 7_565 . . . ?
B8 B3 B4 B5 -100.6(3) . . . . ?
I2 B3 B4 B5 143.3(3) . . . . ?
C1 C1 B5 B9 63.6(3) 7_565 . . . ?
B4 C1 B5 B9 -39.7(3) . . . . ?
B3 C1 B5 B9 -2.7(4) . . . . ?
B6 C1 B5 B9 101.9(3) . . . . ?
I1 C1 B5 B9 -150.5(2) . . . . ?
C1 C1 B5 B10 1.1(3) 7_565 . . . ?
B4 C1 B5 B10 -102.1(3) . . . . ?
B3 C1 B5 B10 -65.1(4) . . . . ?
B6 C1 B5 B10 39.4(3) . . . . ?
I1 C1 B5 B10 147.0(3) . . . . ?
C1 C1 B5 B6 -38.3(2) 7_565 . . . ?
B4 C1 B5 B6 -141.5(3) . . . . ?
B3 C1 B5 B6 -104.6(3) . . . . ?
I1 C1 B5 B6 107.6(3) . . . . ?
C1 C1 B5 B4 103.3(2) 7_565 . . . ?
B3 C1 B5 B4 37.0(3) . . . . ?
B6 C1 B5 B4 141.5(3) . . . . ?
I1 C1 B5 B4 -110.9(3) . . . . ?
B3 B4 B5 C1 -34.4(3) . . . . ?
B9 B4 B5 C1 -134.4(3) . . . . ?
B8 B4 B5 C1 -97.6(3) . . . . ?
C1 B4 B5 B9 134.4(3) . . . . ?
B3 B4 B5 B9 100.0(3) . . . . ?
B8 B4 B5 B9 36.8(3) . . . . ?
C1 B4 B5 B10 96.4(3) . . . . ?
B3 B4 B5 B10 62.0(4) . . . . ?
B9 B4 B5 B10 -38.0(3) . . . . ?
B8 B4 B5 B10 -1.2(4) . . . . ?
C1 B4 B5 B6 34.1(3) . . . . ?
B3 B4 B5 B6 -0.3(4) . . . . ?
B9 B4 B5 B6 -100.3(3) . . . . ?
B8 B4 B5 B6 -63.5(4) . . . . ?
B4 C1 B6 C1 -101.0(3) . . . 7_565 ?
B5 C1 B6 C1 -138.5(3) . . . 7_565 ?
B3 C1 B6 C1 -32.4(3) . . . 7_565 ?
I1 C1 B6 C1 110.85(18) . . . 7_565 ?
C1 C1 B6 B10 98.4(2) 7_565 . . . ?
B4 C1 B6 B10 -2.6(3) . . . . ?
B5 C1 B6 B10 -40.1(2) . . . . ?
B3 C1 B6 B10 66.0(3) . . . . ?
I1 C1 B6 B10 -150.72(19) . . . . ?
C1 C1 B6 B5 35.77(19) 7_565 . . 7_565 ?
B4 C1 B6 B5 -65.2(4) . . . 7_565 ?
B5 C1 B6 B5 -102.7(4) . . . 7_565 ?
B3 C1 B6 B5 3.4(4) . . . 7_565 ?
I1 C1 B6 B5 146.6(3) . . . 7_565 ?
C1 C1 B6 B5 138.5(3) 7_565 . . . ?
B4 C1 B6 B5 37.5(3) . . . . ?
B3 C1 B6 B5 106.1(3) . . . . ?
I1 C1 B6 B5 -110.7(3) . . . . ?
C1 B5 B6 C1 35.7(3) . . . 7_565 ?
B9 B5 B6 C1 -61.0(4) . . . 7_565 ?
B10 B5 B6 C1 -98.5(3) . . . 7_565 ?
B4 B5 B6 C1 2.1(4) . . . 7_565 ?
B9 B5 B6 C1 -96.7(3) . . . . ?
B10 B5 B6 C1 -134.2(3) . . . . ?
B4 B5 B6 C1 -33.6(3) . . . . ?
C1 B5 B6 B10 134.2(3) . . . . ?
B9 B5 B6 B10 37.5(3) . . . . ?
B4 B5 B6 B10 100.6(3) . . . . ?
C1 B5 B6 B5 96.9(3) . . . 7_565 ?
B9 B5 B6 B5 0.1(5) . . . 7_565 ?
B10 B5 B6 B5 -37.4(3) . . . 7_565 ?
B4 B5 B6 B5 63.2(4) . . . 7_565 ?
C1 B3 B8 B9 62.0(2) . . . 7_565 ?
C1 B3 B8 B9 1.3(3) 7_565 . . 7_565 ?
B4 B3 B8 B9 -37.6(3) 7_565 . . 7_565 ?
B4 B3 B8 B9 100.9(3) . . . 7_565 ?
I2 B3 B8 B9 -148.3(2) . . . 7_565 ?
C1 B3 B8 B9 -1.3(3) . . . . ?
C1 B3 B8 B9 -62.0(2) 7_565 . . . ?
B4 B3 B8 B9 -100.9(3) 7_565 . . . ?
B4 B3 B8 B9 37.6(3) . . . . ?
I2 B3 B8 B9 148.3(2) . . . . ?
C1 B3 B8 B4 99.6(3) . . . 7_565 ?
C1 B3 B8 B4 38.8(2) 7_565 . . 7_565 ?
B4 B3 B8 B4 138.4(4) . . . 7_565 ?
I2 B3 B8 B4 -110.8(2) . . . 7_565 ?
C1 B3 B8 B4 -38.8(2) . . . . ?
C1 B3 B8 B4 -99.6(3) 7_565 . . . ?
B4 B3 B8 B4 -138.4(4) 7_565 . . . ?
I2 B3 B8 B4 110.8(2) . . . . ?
C1 B4 B8 B3 39.5(3) . . . . ?
B9 B4 B8 B3 137.7(3) . . . . ?
B5 B4 B8 B3 101.1(3) . . . . ?
C1 B4 B8 B9 -60.6(4) . . . 7_565 ?
B3 B4 B8 B9 -100.1(3) . . . 7_565 ?
B9 B4 B8 B9 37.6(3) . . . 7_565 ?
B5 B4 B8 B9 1.0(4) . . . 7_565 ?
C1 B4 B8 B9 -98.2(3) . . . . ?
B3 B4 B8 B9 -137.7(3) . . . . ?
B5 B4 B8 B9 -36.6(3) . . . . ?
C1 B4 B8 B4 2.6(5) . . . 7_565 ?
B3 B4 B8 B4 -36.9(3) . . . 7_565 ?
B9 B4 B8 B4 100.8(4) . . . 7_565 ?
B5 B4 B8 B4 64.2(4) . . . 7_565 ?
C1 B5 B9 B4 38.8(3) . . . . ?
B10 B5 B9 B4 137.6(3) . . . . ?
B6 B5 B9 B4 100.6(3) . . . . ?
C1 B5 B9 B8 1.7(4) . . . . ?
B10 B5 B9 B8 100.5(3) . . . . ?
B6 B5 B9 B8 63.5(4) . . . . ?
B4 B5 B9 B8 -37.1(3) . . . . ?
C1 B5 B9 B9 -61.9(2) . . . 7_565 ?
B10 B5 B9 B9 36.9(2) . . . 7_565 ?
B6 B5 B9 B9 -0.1(3) . . . 7_565 ?
B4 B5 B9 B9 -100.7(2) . . . 7_565 ?
C1 B5 B9 B10 -98.8(3) . . . . ?
B6 B5 B9 B10 -37.0(3) . . . . ?
B4 B5 B9 B10 -137.6(3) . . . . ?
C1 B4 B9 B5 -39.1(3) . . . . ?
B3 B4 B9 B5 -101.3(3) . . . . ?
B8 B4 B9 B5 -138.9(3) . . . . ?
C1 B4 B9 B8 99.8(3) . . . . ?
B3 B4 B9 B8 37.5(3) . . . . ?
B5 B4 B9 B8 138.9(3) . . . . ?
C1 B4 B9 B9 62.2(3) . . . 7_565 ?
B3 B4 B9 B9 0.0(3) . . . 7_565 ?
B8 B4 B9 B9 -37.6(2) . . . 7_565 ?
B5 B4 B9 B9 101.3(2) . . . 7_565 ?
C1 B4 B9 B10 -1.2(4) . . . . ?
B3 B4 B9 B10 -63.5(4) . . . . ?
B8 B4 B9 B10 -101.0(3) . . . . ?
B5 B4 B9 B10 37.9(3) . . . . ?
B3 B8 B9 B5 -0.3(3) . . . . ?
B9 B8 B9 B5 -100.7(3) 7_565 . . . ?
B4 B8 B9 B5 -63.2(4) 7_565 . . . ?
B4 B8 B9 B5 37.2(3) . . . . ?
B3 B8 B9 B4 -37.5(2) . . . . ?
B9 B8 B9 B4 -137.9(3) 7_565 . . . ?
B4 B8 B9 B4 -100.4(4) 7_565 . . . ?
B3 B8 B9 B9 100.4(2) . . . 7_565 ?
B4 B8 B9 B9 37.53(19) 7_565 . . 7_565 ?
B4 B8 B9 B9 137.9(3) . . . 7_565 ?
B3 B8 B9 B10 63.3(3) . . . . ?
B9 B8 B9 B10 -37.1(4) 7_565 . . . ?
B4 B8 B9 B10 0.4(4) 7_565 . . . ?
B4 B8 B9 B10 100.8(3) . . . . ?
C1 B6 B10 B5 -39.1(2) 7_565 . . 7_565 ?
C1 B6 B10 B5 -99.5(3) . . . 7_565 ?
B5 B6 B10 B5 -138.5(4) . . . 7_565 ?
C1 B6 B10 B5 99.5(3) 7_565 . . . ?
C1 B6 B10 B5 39.1(2) . . . . ?
B5 B6 B10 B5 138.5(4) 7_565 . . . ?
C1 B6 B10 B9 -1.6(3) 7_565 . . 7_565 ?
C1 B6 B10 B9 -62.0(2) . . . 7_565 ?
B5 B6 B10 B9 37.5(3) 7_565 . . 7_565 ?
B5 B6 B10 B9 -101.0(3) . . . 7_565 ?
C1 B6 B10 B9 62.0(2) 7_565 . . . ?
C1 B6 B10 B9 1.6(3) . . . . ?
B5 B6 B10 B9 101.0(3) 7_565 . . . ?
B5 B6 B10 B9 -37.5(3) . . . . ?
C1 B5 B10 B6 -39.5(3) . . . . ?
B9 B5 B10 B6 -138.0(3) . . . . ?
B4 B5 B10 B6 -100.2(3) . . . . ?
C1 B5 B10 B5 -1.8(5) . . . 7_565 ?
B9 B5 B10 B5 -100.3(4) . . . 7_565 ?
B6 B5 B10 B5 37.7(4) . . . 7_565 ?
B4 B5 B10 B5 -62.5(5) . . . 7_565 ?
C1 B5 B10 B9 61.6(4) . . . 7_565 ?
B9 B5 B10 B9 -36.8(3) . . . 7_565 ?
B6 B5 B10 B9 101.2(4) . . . 7_565 ?
B4 B5 B10 B9 1.0(4) . . . 7_565 ?
C1 B5 B10 B9 98.5(3) . . . . ?
B6 B5 B10 B9 138.0(3) . . . . ?
B4 B5 B10 B9 37.8(3) . . . . ?
B5 B9 B10 B6 37.9(2) . . . . ?
B4 B9 B10 B6 -0.2(4) . . . . ?
B8 B9 B10 B6 -63.9(3) . . . . ?
B9 B9 B10 B6 -101.0(2) 7_565 . . . ?
B5 B9 B10 B5 102.1(4) . . . 7_565 ?
B4 B9 B10 B5 64.0(4) . . . 7_565 ?
B8 B9 B10 B5 0.4(4) . . . 7_565 ?
B9 B9 B10 B5 -36.7(2) 7_565 . . 7_565 ?
B4 B9 B10 B5 -38.1(3) . . . . ?
B8 B9 B10 B5 -101.8(3) . . . . ?
B9 B9 B10 B5 -138.9(2) 7_565 . . . ?
B5 B9 B10 B9 138.9(2) . . . 7_565 ?
B4 B9 B10 B9 100.8(3) . . . 7_565 ?
B8 B9 B10 B9 37.1(4) . . . 7_565 ?
 
_refine_diff_density_max    1.403
_refine_diff_density_min   -1.310
_refine_diff_density_rms    0.151

_shelxl_version_number 2014/6

_shelx_res_file
;
TITL siv43 in Pnma
CELL 0.71073  19.1157   8.0014   8.7287  90.000  90.000  90.000
ZERR    4.00   0.0008   0.0003   0.0004   0.000   0.000   0.000
LATT  1
SYMM 0.5-X, -Y, 0.5+Z
SYMM -X, 0.5+Y, -Z
SYMM 0.5+X, 0.5-Y, 0.5-Z
SFAC C H B I
UNIT 8 36 40 12
TEMP -153.000

ACTA
CONF
HTAB

L.S. 4
BOND $H
FMAP 2
PLAN 10

OMIT     8   0   1
OMIT     6   0   1
OMIT     0   2   0
OMIT     0   4   0

WGHT    0.027300    4.567600
FVAR       0.24232
I1    4    0.144434    0.013281    0.574039    11.00000    0.01656    0.02286 =
         0.02154    0.00728    0.00051   -0.00056
I2    4    0.293453    0.250000    0.372467    10.50000    0.00869    0.02281 =
         0.01405    0.00000   -0.00118    0.00000
C1    1    0.121395    0.144685    0.371553    11.00000    0.01338    0.01364 =
         0.01722    0.00038    0.00016   -0.00021
B3    3    0.188472    0.250000    0.280833    10.50000    0.00753    0.01986 =
         0.01475    0.00000    0.00049    0.00000
B4    3    0.149579    0.069833    0.199574    11.00000    0.01526    0.02481 =
         0.01767   -0.00603    0.00016   -0.00003
AFIX 153
H4    2    0.179782   -0.049059    0.185050    11.00000   -1.20000
AFIX   0
B5    3    0.058680    0.068635    0.249564    11.00000    0.01164    0.02128 =
         0.02351   -0.00377   -0.00219   -0.00119
AFIX 153
H5    2    0.029133   -0.050708    0.267135    11.00000   -1.20000
AFIX   0
B6    3    0.042248    0.250000    0.363398    10.50000    0.00965    0.01763 =
         0.01896    0.00000    0.00123    0.00000
AFIX 153
H6    2    0.002444    0.250000    0.457554    10.50000   -1.20000
AFIX   0
B8    3    0.165745    0.250000    0.083968    10.50000    0.01013    0.02911 =
         0.01264    0.00000   -0.00225    0.00000
AFIX 153
H8    2    0.206106    0.250000   -0.009043    10.50000   -1.20000
AFIX   0
B9    3    0.085481    0.138406    0.065424    11.00000    0.01438    0.03355 =
         0.01909   -0.00625   -0.00317   -0.00146
AFIX 153
H9    2    0.073061    0.064692   -0.040209    11.00000   -1.20000
AFIX   0
B10   3    0.019591    0.250000    0.168275    10.50000    0.01005    0.02841 =
         0.01852    0.00000   -0.00205    0.00000
AFIX 153
H10   2   -0.036452    0.250000    0.130855    10.50000   -1.20000

AFIX   0
HKLF 4

REM  siv43 in Pnma
REM R1 =  0.0224 for    1613 Fo > 4sig(Fo)  and  0.0254 for all    1739 data
REM     76 parameters refined using      0 restraints

END

WGHT      0.0274      4.5703

REM No hydrogen bonds found for HTAB generation

REM Highest difference peak  1.403,  deepest hole -1.310,  1-sigma level  0.151
Q1    1   0.2964  0.1649  0.3412  11.00000  0.05    1.40
Q2    1   0.1494  0.1331  0.5908  11.00000  0.05    0.67
Q3    1   0.2787  0.2500  0.3990  10.50000  0.05    0.66
Q4    1   0.1469 -0.1081  0.5389  11.00000  0.05    0.65
Q5    1   0.3138  0.2500  0.4002  10.50000  0.05    0.63
Q6    1   0.2180  0.2500  0.3674  10.50000  0.05    0.55
Q7    1   0.2050  0.2500  0.1687  10.50000  0.05    0.52
Q8    1   0.0365  0.2500  0.2602  10.50000  0.05    0.43
Q9    1   0.0871  0.2500  0.0973  10.50000  0.05    0.41
Q10   1   0.1749 -0.0342  0.2357  11.00000  0.05    0.40
;
_shelx_res_checksum   21255

_shelx_hkl_file
;
   0  -1   0    0.22    0.67
   0  -1   0    0.10    0.57
   0  -1   0    2.21    0.72
   0   1   0    0.01    0.76
   0  -1   0    0.24    0.43
   0   1   0    0.55    0.42
   0   2   0 1036.54   25.75
   0  -2   0 1037.75   27.29
   0  -2   0 1054.71   25.80
   0  -2   0 1048.62   26.30
   0  -2   0 1059.77   26.58
   0   2   0 1076.34   26.66
   0   2   0 1045.07   27.25
   0   2   0 1033.18   26.65
   0   2   0 1078.85   26.37
   0  -2   0 1064.32   26.67
   0   3   0    1.78    1.50
   0   3   0    0.06    1.78
   0  -3   0    1.30    2.40
   0   3   0   -0.71    1.82
   0   3   0    4.57    2.77
   0  -3   0    1.10    1.52
   0   3   0   -0.16    1.18
   0  -3   0    5.63    2.33
   0  -4   0 8158.65  201.85
   0  -4   0 8068.29  204.57
   0   4   0 8719.96  199.85
   0  -4   0 8582.80  205.44
   0  -4   0 8749.49  200.56
   0   4   0 8656.02  204.87
   0   4   0 8272.88  200.34
   0   4   0 8563.31  202.16
   0  -5   0    4.56    4.02
   0  -5   0    2.55    1.97
   0   5   0    0.69    3.27
   0   5   0    0.06    2.67
   0   5   0   13.65    4.03
   0   5   0    1.15    2.30
   0  -5   0   -0.74    3.28
   0   6   0  125.41    7.78
   0  -6   0  129.47    5.63
   0  -6   0  134.14   10.18
   0   6   0  127.35    8.93
   0   6   0  126.00    8.88
   0   7   0    1.41    5.40
   0   7   0   -0.70    4.32
   0  -7   0   -0.66    6.09
   0   7   0   -0.46    5.29
   0   8   0 2167.26   57.93
   0  -8   0 2112.68   60.63
   0   8   0 2161.04   59.10
   0   9   0   -1.87    8.05
   0  -9   0   -0.03    9.21
   0   9   0    2.80    8.80
   0 -10   0    2.29   11.57
   0  10   0   -0.75   10.41
   0  10   0    6.83   11.48
   0   0   1   -0.83    0.43
   0   0  -1   -0.45    0.46
   0   0  -1   -0.97    0.54
   0   0  -1   -1.19    0.66
   0   0   1   -0.79    0.65
   0   0   1   -0.55    0.62
   0   1   1 3791.27   84.65
   0   1   1 3525.94   85.36
   0   1  -1 3193.75   83.83
   0  -1   1 3507.95   85.41
   0   1   1 3486.26   84.08
   0  -1  -1 3641.65   85.47
   0   1  -1 3534.84   85.38
   0  -1   1 3480.43   83.88
   0  -1  -1 3663.88   84.18
   0   2  -1    5.63    1.66
   0  -2  -1   -0.29    0.62
   0   2   1    0.43    1.15
   0   2  -1    4.90    2.10
   0   2   1    2.88    1.22
   0   2   1   -0.14    0.61
   0  -2  -1   -0.02    1.11
   0   2  -1   -0.45    1.56
   0  -2   1    4.95    2.04
   0   2  -1    0.35    1.12
   0  -2   1   -1.32    1.59
   0  -2   1   -0.22    1.53
   0   2  -1    2.47    1.46
   0  -2  -1    0.01    1.08
   0  -2  -1    1.97    1.46
   0  -2   1   -0.94    1.42
   0  -2   1    3.17    0.99
   0   2   1   -0.12    1.45
   0  -2  -1    0.94    1.76
   0   2   1    1.16    1.89
   0   3   1 1218.93   29.54
   0  -3  -1 1240.03   31.68
   0   3  -1 1189.65   29.38
   0  -3   1 1190.45   30.39
   0  -3  -1 1213.84   30.93
   0   3  -1 1170.58   31.37
   0  -3   1 1161.15   30.48
   0   3   1 1163.32   30.80
   0  -3  -1 1185.92   29.66
   0  -3   1 1201.92   31.58
   0   3   1 1276.63   29.90
   0  -3   1 1234.76   29.15
   0   3   1 1181.08   29.63
   0   3  -1 1121.08   30.36
   0   3  -1 1206.26   31.01
   0  -3  -1 1151.39   29.46
   0   3  -1 1226.25   30.67
   0  -3  -1 1201.24   29.63
   0   3   1 1121.24   31.35
   0   4   1    4.21    2.19
   0  -4  -1    0.30    2.86
   0   4  -1   -0.26    2.43
   0  -4  -1   -0.51    1.78
   0  -4   1    0.65    2.81
   0  -4  -1    0.91    1.72
   0   4  -1   -0.33    2.70
   0   4   1    1.55    1.73
   0   4  -1    0.22    1.83
   0  -4   1    3.59    1.48
   0   4   1   -0.63    2.37
   0   4  -1    2.94    2.64
   0  -4   1    3.51    3.36
   0  -4   1   -1.12    3.05
   0  -4  -1    9.49    3.32
   0   4   1    1.35    2.59
   0   5  -1  190.20    6.86
   0  -5  -1  191.82    7.24
   0  -5  -1  238.59   10.54
   0  -5   1  204.20   10.27
   0   5   1  198.51    7.40
   0  -5   1  205.42    6.46
   0   5   1  196.53    7.67
   0   5  -1  196.02    9.34
   0   5   1  189.34    8.92
   0   5  -1  207.53    9.08
   0   5  -1  215.47    9.84
   0   5   1  200.60    9.64
   0  -5  -1  187.29    7.54
   0  -6   1    0.95    5.18
   0   6   1    2.20    3.20
   0   6  -1   -0.77    4.17
   0  -6  -1    1.94    4.55
   0  -6   1    0.91    1.99
   0  -6  -1    2.63    2.81
   0   6   1   -3.51    4.10
   0   6  -1    0.96    4.37
   0   6  -1    0.13    3.93
   0   6   1    3.39    4.43
   0   7   1  803.37   25.36
   0   7  -1  808.63   26.40
   0  -7  -1  815.89   27.89
   0   7  -1  833.31   26.37
   0   7   1  795.84   26.44
   0   7  -1  848.16   25.64
   0  -7   1  824.27   28.04
   0   8   1   -3.39    6.39
   0   8  -1    2.67    7.40
   0   8  -1   -1.36    6.33
   0   8  -1    0.86    6.83
   0   8   1    6.17    6.69
   0  -8  -1    5.30    7.53
   0  -8   1    0.77    7.85
   0  -9   1   11.69   10.17
   0   9  -1   21.04   10.24
   0   9  -1   11.70    8.97
   0  -9  -1   10.72    9.83
   0   9   1   11.27    8.93
   0   9   1   19.36    9.06
   0  10   1    2.96   10.88
   0 -10  -1   -8.57   11.05
   0 -10   1    9.45   12.01
   0  10  -1    1.56   10.10
   0  10   1    2.64   10.39
   0  10  -1    1.88   11.91
   0   0  -2 1520.35   35.99
   0   0   2 1504.02   37.62
   0   0   2 1532.05   36.95
   0   0  -2 1535.85   36.94
   0   0  -2 1488.81   37.67
   0   0   2 1567.56   37.74
   0   0   2 1502.66   37.31
   0   0  -2 1478.15   37.31
   0   0  -2 1506.59   37.64
   0   0   2 1495.11   35.95
   0   1  -2    0.35    1.35
   0  -1  -2    0.14    1.37
   0  -1   2    1.02    1.54
   0  -1   2   -1.11    1.06
   0   1  -2    0.02    1.44
   0  -1  -2    0.82    1.41
   0  -1  -2    2.29    1.40
   0   1  -2   -0.59    1.15
   0  -1  -2    0.84    0.84
   0  -1   2   -0.30    1.32
   0   1   2    1.21    1.40
   0   1   2    1.00    1.42
   0  -1   2    0.09    1.36
   0   1   2    0.83    0.88
   0   1  -2   -2.24    1.70
   0  -1  -2    2.06    1.46
   0  -1   2   -1.70    1.49
   0   1  -2    0.48    1.25
   0   2  -2 1747.20   44.73
   0   2  -2 1874.54   44.98
   0   2  -2 1785.77   43.22
   0  -2  -2 1805.08   44.07
   0  -2   2 1712.54   43.37
   0  -2   2 1649.55   43.59
   0   2  -2 1787.79   43.50
   0  -2  -2 1762.93   41.76
   0  -2  -2 1766.93   43.56
   0   2   2 1795.29   44.03
   0   2   2 1703.78   43.53
   0   2  -2 1791.48   43.27
   0   2   2 1710.83   44.63
   0  -2   2 1758.29   44.75
   0  -2   2 1840.87   44.90
   0  -2  -2 1788.65   44.75
   0  -3  -2    2.70    1.71
   0  -3  -2    2.44    3.52
   0  -3  -2    0.94    1.82
   0   3   2    0.20    1.60
   0   3  -2    0.13    1.59
   0  -3  -2    1.07    2.24
   0   3   2    1.65    2.28
   0  -3   2   -0.54    2.26
   0   3  -2    1.91    2.00
   0  -3   2   -0.99    2.45
   0   3  -2    4.19    3.51
   0   3  -2    0.86    2.37
   0   3  -2   -0.84    2.23
   0  -3   2    0.03    2.71
   0   3   2    0.05    2.04
   0   4  -2  999.93   27.38
   0   4  -2 1072.88   28.01
   0  -4   2 1052.39   28.84
   0   4  -2 1026.88   28.12
   0  -4  -2 1025.29   28.68
   0  -4  -2  936.45   25.89
   0   4   2  980.55   26.43
   0   4   2 1001.01   27.99
   0   4  -2 1018.94   26.10
   0   4   2 1019.11   26.11
   0   4  -2 1006.75   25.64
   0  -4  -2 1021.82   26.43
   0   5  -2    0.70    3.25
   0   5   2    0.54    1.63
   0   5  -2   -0.85    3.52
   0  -5   2    0.01    3.95
   0   5   2    3.56    3.12
   0   5  -2    2.56    2.33
   0   5   2    1.03    1.58
   0  -5  -2   11.49    4.52
   0   5  -2    3.28    3.88
   0  -5  -2    2.45    2.55
   0   5  -2    0.58    3.74
   0   5   2   -0.26    3.39
   0   5   2    2.48    3.68
   0   6   2 1005.36   30.00
   0  -6  -2  991.08   30.54
   0  -6  -2 1017.19   27.98
   0   6   2 1011.83   27.87
   0   6  -2  975.90   29.30
   0   6   2  965.24   25.38
   0   6  -2  969.05   25.36
   0  -6   2 1029.54   30.92
   0   6  -2 1023.96   29.47
   0   6  -2  997.02   29.59
   0   7   2    2.26    5.62
   0   7   2    3.11    5.21
   0  -7   2    1.93    6.31
   0   7  -2   -1.56    6.50
   0   7  -2    1.17    5.41
   0  -7  -2   -1.27    5.40
   0   7  -2   -3.06    6.20
   0   8   2  357.10   16.48
   0   8  -2  387.41   18.58
   0   8  -2  354.24   17.25
   0  -8   2  384.60   19.44
   0   8   2  357.63   18.08
   0   8  -2  379.22   18.76
   0  -8  -2  372.24   18.98
   0   9  -2   -1.68    9.56
   0   9  -2    0.06    8.28
   0   9  -2   -0.72    8.95
   0  -9   2    4.05    9.55
   0   9   2   -1.57    8.38
   0  -9  -2   -4.29    9.25
   0   9   2    3.69    8.81
   0  10  -2  133.11   15.14
   0 -10  -2  161.61   17.61
   0 -10   2  129.95   15.95
   0  10   2  202.59   17.78
   0   0   3    2.23    2.36
   0   0   3   -0.98    1.81
   0   0  -3   -2.76    1.77
   0   0   3   -0.36    1.25
   0   0  -3   -2.18    1.52
   0   0  -3   -1.42    1.59
   0   0   3   -3.42    1.79
   0   0  -3   -3.08    2.09
   0   0  -3   -2.53    1.19
   0   0   3   -2.66    1.53
   0   1   3  765.59   21.26
   0  -1  -3  782.64   21.21
   0  -1   3  799.40   21.56
   0   1   3  804.84   20.45
   0  -1  -3  790.14   20.40
   0  -1   3  830.33   20.50
   0   1   3  763.32   20.99
   0  -1  -3  727.90   21.36
   0  -1   3  794.36   20.53
   0   1   3  828.99   21.64
   0   1  -3  803.14   21.59
   0   1  -3  808.83   20.48
   0   1  -3  794.40   21.10
   0   1  -3  776.94   20.68
   0  -1   3  752.28   21.42
   0   1  -3  760.45   21.56
   0  -1  -3  804.89   21.18
   0  -2   3    4.09    2.80
   0   2  -3    2.00    2.22
   0  -2   3   -0.25    2.47
   0   2  -3    3.63    2.46
   0   2  -3    2.56    2.56
   0   2   3    0.32    2.43
   0   2  -3   -0.33    3.60
   0  -2  -3   -0.46    2.09
   0  -2   3   -1.58    2.61
   0  -2  -3   -1.44    2.50
   0   2  -3    0.58    2.68
   0  -2   3    1.86    2.02
   0  -2  -3    0.66    1.05
   0   2  -3   -0.73    1.87
   0   2   3   -0.88    1.09
   0  -2  -3    1.29    2.85
   0  -3   3 1958.27   47.94
   0   3  -3 1802.65   49.17
   0   3   3 1925.22   48.52
   0   3  -3 1875.40   47.29
   0   3   3 1916.03   45.15
   0   3  -3 1901.09   47.18
   0  -3  -3 1965.78   49.39
   0   3   3 1848.45   47.77
   0  -3   3 1888.40   47.43
   0  -3  -3 1839.49   45.09
   0   3  -3 1919.41   47.89
   0   3  -3 1960.59   49.43
   0   4  -3    2.21    2.52
   0   4   3    7.02    2.37
   0   4  -3    0.81    3.58
   0   4  -3   -3.18    3.03
   0  -4   3    2.19    3.59
   0  -4  -3   -0.72    3.25
   0  -4  -3    2.85    2.80
   0  -4  -3    0.75    2.41
   0  -4   3   -1.21    3.23
   0  -4   3    2.17    3.86
   0   4   3    3.82    3.37
   0   4  -3    2.39    3.29
   0   5   3  102.83    6.27
   0  -5   3  109.10    8.70
   0  -5  -3  114.85    8.94
   0   5  -3  108.81    7.37
   0   5   3  110.86    8.55
   0   5  -3   92.61    5.95
   0  -5  -3   89.21    6.14
   0   5  -3  110.24    8.58
   0  -5  -3   98.43    6.74
   0  -5   3  122.28    8.57
   0   5  -3  113.08    8.44
   0   6  -3   -0.14    3.21
   0   6  -3    0.97    5.47
   0   6  -3    6.89    5.02
   0  -6   3    5.19    5.80
   0   6  -3    0.59    4.82
   0   6   3    1.46    4.99
   0  -6  -3    7.05    5.12
   0   6   3    1.34    3.84
   0  -6  -3   -0.43    3.72
   0   7  -3 1261.79   36.49
   0  -7   3 1186.64   37.69
   0  -7  -3 1181.42   37.58
   0  -7  -3 1232.59   33.35
   0   7  -3 1282.58   36.74
   0   7  -3 1178.54   36.31
   0   7   3 1238.62   37.02
   0   7   3 1222.82   33.68
   0   8  -3    2.20    7.31
   0   8  -3   -3.72    7.22
   0   8   3    0.15    6.97
   0  -8  -3   -1.52    7.93
   0   8  -3    0.75    8.83
   0   8   3    0.11    7.24
   0  -8   3   -2.84    8.19
   0  -9   3   27.35   10.99
   0  -9  -3   21.88    9.67
   0   9  -3   30.94   10.75
   0   9  -3   26.91   10.22
   0   9   3   26.98   10.19
   0  10   3    1.86   10.87
   0 -10   3    6.63   12.78
   0   0   4 3398.83   80.77
   0   0   4 3600.35   84.73
   0   0  -4 3301.77   82.84
   0   0  -4 3295.38   84.50
   0   0  -4 3464.38   83.86
   0   0   4 3345.22   84.41
   0   0   4 3462.88   82.97
   0   0  -4 3427.76   84.53
   0   0  -4 3478.74   80.83
   0   1  -4   -1.36    3.02
   0   1   4   -2.02    2.43
   0   1  -4    2.39    2.25
   0  -1  -4   -5.04    1.75
   0   1   4   -0.72    2.26
   0   1  -4    1.99    2.65
   0  -1  -4   -2.68    3.69
   0  -1  -4   -2.27    0.87
   0  -1  -4   -2.16    2.19
   0   1  -4   -1.75    2.33
   0  -1   4   -5.95    2.33
   0   1  -4   -2.07    3.48
   0  -1  -4   -3.42    2.97
   0   1   4    1.76    2.36
   0  -1   4   -2.11    2.02
   0  -2  -4  618.28   16.36
   0   2  -4  601.00   19.26
   0   2  -4  591.67   18.14
   0   2  -4  633.79   19.16
   0   2  -4  587.66   17.81
   0  -2  -4  609.82   18.76
   0  -2   4  614.16   17.33
   0   2   4  615.51   16.40
   0   2   4  634.35   18.44
   0   2  -4  625.01   18.87
   0   2  -4  652.05   17.98
   0  -2  -4  647.52   18.44
   0  -3   4    2.18    3.57
   0  -3   4   -0.77    2.78
   0   3  -4    0.97    3.42
   0   3  -4    5.18    3.53
   0   3   4   -0.92    3.24
   0  -3  -4   -0.93    2.89
   0  -3  -4    1.54    3.39
   0  -3   4    7.78    3.94
   0   3  -4   -0.38    2.82
   0   3  -4   -0.34    3.97
   0  -4  -4 1556.27   43.06
   0   4  -4 1572.86   40.39
   0  -4  -4 1591.06   41.33
   0   4   4 1611.11   37.78
   0   4  -4 1483.01   40.72
   0   4  -4 1616.56   41.92
   0   4   4 1595.06   42.40
   0  -4   4 1615.11   41.25
   0  -4   4 1590.58   40.95
   0  -4   4 1530.39   42.99
   0   4  -4 1621.62   43.21
   0  -4  -4 1508.63   37.73
   0  -5   4    3.59    4.55
   0  -5  -4    4.07    3.99
   0   5  -4   -2.11    4.37
   0   5  -4    0.21    4.44
   0   5   4    0.90    4.57
   0  -5  -4    1.39    4.55
   0   5  -4    0.74    3.37
   0  -5   4    0.28    4.97
   0   5   4    2.49    2.75
   0   6  -4  114.56   10.04
   0  -6   4  119.26    9.78
   0   6  -4   99.92    6.81
   0   6   4  109.32    7.31
   0  -6   4  105.22   10.18
   0   6   4   99.97   14.93
   0  -6  -4  102.38    7.98
   0  -7  -4    0.17    5.15
   0   7  -4   -3.50    6.68
   0   7  -4    3.24    6.76
   0  -7  -4   -0.70    6.74
   0  -7   4    3.59    6.62
   0  -7   4    0.86    7.52
   0   7   4    0.33    6.52
   0  -8  -4  604.63   24.98
   0   8  -4  555.21   24.07
   0  -8   4  555.99   24.28
   0  -8   4  564.92   24.79
   0   8   4  583.53   24.97
   0   8  -4  569.91   23.65
   0  -9   4   -1.11    9.66
   0   9  -4    0.93    9.85
   0   9   4    1.73    9.81
   0   9  -4   -5.56    9.43
   0  -9  -4   -4.19    9.64
   0   0   5    0.01    2.82
   0   0  -5    0.01    2.64
   0   0   5    0.09    2.21
   0   0  -5    1.39    2.00
   0   0  -5    0.20    3.00
   0   0   5    0.45    2.57
   0  -1  -5  832.77   23.70
   0  -1   5  832.23   23.70
   0   1   5  793.98   19.66
   0   1   5  796.00   23.51
   0  -1  -5  791.24   19.62
   0   1  -5  792.74   22.84
   0   1   5  818.81   23.06
   0   1  -5  817.35   23.60
   0  -1  -5  802.22   22.33
   0   1  -5  816.67   23.44
   0   1   5  812.67   22.48
   0   1  -5  827.57   21.85
   0  -1   5  830.46   23.81
   0  -1   5  795.98   21.78
   0   2  -5   -0.30    3.47
   0   2  -5    3.24    4.53
   0   2  -5   -0.63    2.96
   0   2   5   -1.44    2.72
   0   2  -5    0.87    3.32
   0  -2   5    5.89    3.60
   0  -2  -5    2.01    2.22
   0  -2   5    0.13    3.12
   0  -2  -5    1.86    3.31
   0   2   5   -1.00    3.14
   0  -2  -5    2.16    3.42
   0  -3  -5  316.51    9.02
   0  -3   5  328.23   13.40
   0   3  -5  321.65   12.26
   0  -3  -5  343.68   12.68
   0   3  -5  318.25   13.13
   0  -3   5  292.51   11.16
   0   3   5  303.95   12.53
   0   3  -5  308.18   11.87
   0  -3   5  293.85   12.29
   0  -3  -5  347.61   13.42
   0   3   5  288.61    9.09
   0   4   5    1.74    4.32
   0   4  -5    6.93    4.89
   0  -4  -5    2.07    4.65
   0   4  -5    5.11    4.02
   0  -4  -5   -0.54    3.91
   0   4  -5    0.51    4.14
   0  -4   5   -2.91    4.63
   0  -4   5    1.21    3.83
   0  -5   5  682.70   23.45
   0   5   5  652.08   22.80
   0  -5   5  704.43   21.39
   0   5  -5  634.47   22.27
   0  -5  -5  671.87   21.69
   0   5  -5  661.13   20.40
   0  -5  -5  648.27   23.33
   0   5  -5  672.55   23.12
   0  -6  -5    5.17    6.51
   0   6  -5   -0.18    6.32
   0  -6  -5    1.28    5.34
   0  -6   5    4.38    5.82
   0   6  -5   -2.22    5.85
   0   6  -5   -1.74    4.87
   0   6   5    1.30    6.60
   0  -6   5    7.69    7.03
   0   7   5    4.85    7.34
   0  -7   5   20.49    8.59
   0  -7   5    2.64   12.24
   0  -7  -5    5.66    6.35
   0  -7  -5    9.46    7.88
   0   7  -5   12.53    7.73
   0   7  -5    4.92    7.57
   0  -8  -5   -0.42    9.13
   0   8   5    6.82    9.48
   0  -8   5    4.18   10.08
   0   8  -5    2.23    8.91
   0   8  -5    2.32    8.75
   0  -9   5  456.66   25.50
   0  -9  -5  415.40   24.43
   0   9  -5  372.81   23.99
   0   9  -5  377.70   23.63
   0   9   5  449.06   24.25
   0   0   6 2560.75   63.92
   0   0  -6 2545.14   65.14
   0   0  -6 2540.38   61.20
   0   0   6 2585.19   65.66
   0   0   6 2490.81   61.19
   0   0  -6 2523.94   65.15
   0  -1   6    1.77    3.09
   0  -1  -6    1.70    1.59
   0  -1  -6    2.64    4.17
   0   1  -6    3.93    3.88
   0   1   6    3.26    3.75
   0   1   6    1.65    1.88
   0  -1   6    2.17    3.92
   0  -1  -6    2.46    3.23
   0   1  -6    4.00    4.14
   0   1  -6    1.62    3.08
   0   1   6    2.64    3.50
   0  -1   6    1.05    4.65
   0   2  -6 2541.03   64.82
   0   2  -6 2558.79   63.05
   0  -2  -6 2583.97   65.33
   0   2   6 2560.76   64.75
   0  -2  -6 2495.24   65.93
   0  -2  -6 2475.57   63.36
   0   2  -6 2447.35   66.00
   0  -2   6 2570.61   65.90
   0  -2   6 2528.24   63.34
   0   3  -6   -0.07    4.17
   0  -3  -6    2.15    2.62
   0   3   6    5.72    4.58
   0  -3   6   -0.43    3.63
   0  -3  -6    2.90    4.63
   0  -3  -6    1.25    4.62
   0   3  -6    4.47    5.08
   0   3  -6   -2.74    4.18
   0  -3   6    0.18    4.63
   0   4   6 1203.95   35.08
   0  -4  -6 1173.03   34.29
   0   4  -6 1147.95   34.03
   0   4  -6 1135.11   35.41
   0  -4   6 1179.95   32.62
   0  -4   6 1251.61   35.85
   0  -4  -6 1191.42   35.71
   0   4  -6 1221.71   33.57
   0   5  -6    4.30    5.21
   0  -5  -6    0.83    5.96
   0   5  -6   -3.29    5.99
   0   5  -6    1.17    7.61
   0  -5   6    1.81    5.24
   0  -5   6   -0.17    6.26
   0   5   6    2.07    5.84
   0  -5  -6   -2.55    5.43
   0  -6  -6  781.99   28.34
   0  -6   6  770.17   27.89
   0   6  -6  827.90   30.77
   0  -6  -6  752.88   25.78
   0   6   6  743.58   27.49
   0   6  -6  765.42   27.91
   0   6  -6  782.48   27.28
   0   7  -6    4.23    8.15
   0   7  -6    0.95    8.38
   0  -7  -6    7.19    7.33
   0  -7  -6    5.56    7.97
   0   7   6    0.28    7.99
   0  -7   6   -3.25    8.89
   0  -8   6  267.84   20.25
   0   8  -6  296.59   19.79
   0  -8  -6  266.92   20.32
   0   8  -6  270.07   19.93
   0   8   6  229.70   17.86
   0  -9  -6    2.10   11.58
   0   9  -6   -5.20   11.69
   0   9   6   -0.66   11.47
   0   9  -6   -4.14   12.09
   0  -9   6   -9.11   17.91
   0   0  -7    0.00    3.02
   0   0   7    0.39    3.98
   0   0  -7    0.48    4.14
   0   0  -7    5.51    4.85
   0   0   7    1.78    4.51
   0   1   7  232.35   12.12
   0   1  -7  246.60   12.42
   0   1   7  231.24   11.56
   0  -1  -7  232.92   10.70
   0   1  -7  233.68   10.04
   0  -1   7  225.65   10.67
   0  -1   7  232.99   12.32
   0   1  -7  249.58   12.16
   0  -1  -7  237.83   12.52
   0   2  -7    2.20    5.10
   0  -2   7    0.35    4.00
   0  -2  -7   -0.30    5.02
   0  -2  -7    4.94    4.02
   0  -2   7    1.56    5.09
   0   2  -7   -0.09    4.96
   0   2   7    1.31    4.84
   0  -2  -7   -1.64    4.81
   0   2  -7    1.26    4.19
   0  -3  -7  313.59   15.12
   0  -3   7  327.13   15.57
   0  -3  -7  324.28   15.50
   0   3  -7  312.03   13.83
   0   3   7  310.01   14.69
   0   3  -7  341.06   17.05
   0   3  -7  331.22   14.89
   0  -3   7  318.63   13.03
   0   4  -7   -2.47    5.58
   0  -4  -7   -0.79    6.60
   0   4  -7   12.74    6.06
   0   4  -7   -0.75    5.59
   0  -4   7   -0.58    5.00
   0   4   7   -2.73    5.50
   0  -4  -7   -2.77    5.78
   0  -4   7   -0.01    6.59
   0  -5   7   43.34    9.09
   0   5  -7   32.13    7.72
   0   5   7   25.03    7.73
   0   5  -7   36.26    7.62
   0  -5  -7   35.32    8.12
   0   5  -7   39.06    8.81
   0  -5  -7   29.91    8.34
   0   6   7    2.15    7.99
   0   6  -7    2.32    7.83
   0  -6  -7   -4.05    8.18
   0   6  -7   14.74    8.74
   0  -6  -7   -0.83    7.43
   0  -6   7   10.44    9.21
   0   7  -7  151.10   14.46
   0  -7  -7  220.73   17.57
   0  -7  -7  227.66   16.71
   0   7  -7  178.18   15.07
   0   7   7  211.70   16.87
   0  -7   7  242.39   17.55
   0   8  -7   -0.26   10.90
   0   8  -7   -1.70   11.35
   0   0   8  110.84    9.84
   0   0  -8  103.68    9.54
   0   0  -8   98.73    8.87
   0   0   8  101.41    8.53
   0  -1  -8    3.95    5.30
   0   1  -8    1.48    4.30
   0   1   8    1.10    5.22
   0   1  -8    4.24    6.07
   0   1  -8   -0.96    5.68
   0  -1   8    3.68    5.21
   0  -1   8    0.31    5.61
   0  -1  -8    0.46    6.04
   0  -2   8 2716.22   69.07
   0   2  -8 2684.83   72.33
   0  -2  -8 2672.06   71.74
   0  -2  -8 2725.09   72.62
   0   2   8 2754.81   70.86
   0   2  -8 2653.52   68.09
   0  -2  -8 2716.54   69.25
   0   2  -8 2686.28   71.26
   0  -2   8 2714.37   71.94
   0   3  -8    2.93    6.56
   0  -3  -8    1.63    6.90
   0   3   8   -1.66    5.93
   0  -3  -8    4.08    6.94
   0  -3   8    0.94    6.73
   0   3  -8    0.53    6.49
   0   3  -8    3.99    6.20
   0  -3   8   -1.44    5.24
   0  -4   8   80.82   10.41
   0   4  -8   77.13    9.50
   0  -4  -8   76.40   10.23
   0   4  -8   77.88   10.74
   0   4   8   87.49   10.64
   0   4  -8   85.00    9.79
   0  -4  -8   75.30   11.06
   0  -5  -8   14.00    9.28
   0   5  -8   -2.28    8.30
   0  -5  -8   -2.04    7.80
   0   5  -8   -1.84    7.62
   0   5   8    2.66    7.80
   0   5  -8   -0.19    7.51
   0  -5   8    4.17    8.54
   0  -6  -8 1168.30   40.61
   0  -6   8 1246.25   40.16
   0   6  -8 1183.47   40.35
   0   6   8 1272.14   40.63
   0  -6  -8 1197.60   38.59
   0   6  -8 1193.28   38.70
   0  -7  -8    8.97   11.40
   0   7  -8   -5.43   10.05
   0  -7  -8    0.41   10.16
   0   7  -8    1.99   10.86
   0   7   8   -2.38   10.88
   0   0  -9    3.25    6.80
   0   0  -9   -2.09    6.64
   0   0   9   16.97    6.97
   0   0   9    2.17    6.91
   0  -1  -9  351.54   17.98
   0  -1  -9  324.52   17.96
   0  -1  -9  342.30   16.19
   0  -1   9  355.68   17.93
   0   1  -9  348.47   17.37
   0   1  -9  363.10   18.16
   0   1   9  367.78   16.97
   0  -1   9  332.45   15.97
   0  -2  -9    7.54    7.96
   0   2  -9   -2.15    7.21
   0  -2  -9   12.33    8.09
   0  -2   9    7.00    6.65
   0   2   9    1.52    6.92
   0  -2   9   -1.06    7.27
   0   2  -9    5.04    7.69
   0   3  -9   36.79    8.44
   0  -3   9   29.83    9.23
   0  -3  -9   19.08    9.12
   0   3  -9   35.38    9.44
   0   3   9   26.29    8.57
   0   3  -9   33.75    9.13
   0  -3  -9   25.66    9.19
   0  -4   9    6.01    9.16
   0  -4  -9   -0.78    8.29
   0   4  -9   -0.46    7.97
   0   4  -9   -4.43    8.68
   0  -4  -9   -2.99    9.28
   0   4  -9    5.65    8.50
   0   4   9   -4.44    8.02
   0   5  -9  459.64   22.59
   0   5  -9  462.87   22.72
   0   5   9  450.25   22.86
   0  -5   9  479.23   24.01
   0  -5  -9  457.01   23.81
   0  -5  -9  479.73   23.86
   0   5  -9  449.34   23.44
   0   6   9   -1.67   11.06
   0  -6  -9    2.86   11.18
   0   6  -9   -2.96   10.59
   0  -6  -9    0.41   10.27
   0   0  10   55.10    9.64
   0   0 -10   40.09    9.84
   0   0 -10   15.87    9.10
   0   0  10   53.90   10.49
   0  -1 -10   -4.98    9.02
   0  -1 -10    2.51    9.21
   0   1  10   -0.77    8.38
   0  -1  10    0.62    7.80
   0   1 -10    1.52    8.18
   0  -1  10    2.36    8.21
   0   1 -10   -2.46    8.40
   0   2 -10   -0.18    9.12
   0   2 -10    6.40    9.22
   0  -2 -10    5.15    9.44
   0  -2 -10    2.24    9.55
   0  -2  10   -0.04    8.83
   0   2  10    4.64    8.45
   0   3  10   -2.49    8.67
   0  -3 -10   -2.04    9.98
   0   3 -10   -2.17    9.44
   0  -3 -10   -2.56    9.84
   0   3 -10   -0.29    9.48
   0  -3  10    2.41    9.38
   0  -4  10   15.92   16.24
   0   4  10   15.75   10.18
   0  -4 -10   14.16   11.03
   0  -4 -10   20.44   11.75
   0   4 -10   22.49   11.30
   0   4 -10   18.50   10.91
   0  -5 -10   -2.77   11.38
   0   5 -10   -0.76   11.54
   0   5 -10    5.06   11.59
   0   5 -10    0.70   10.78
   0   5  10   -4.38   10.82
   0   0 -11   -0.45   10.85
   0   0 -11    1.58   11.13
   0  -1 -11   64.00   13.96
   0   1 -11   96.36   14.15
   0  -1 -11   77.04   14.04
   0  -1  11   65.81   12.55
   0   1  11   81.20   12.60
   0   1 -11   74.82   12.60
   0  -2 -11    5.58   11.39
   0  -2  11   -2.00   10.47
   0  -2 -11    3.27   18.74
   0   2 -11   -0.92   10.71
   0   2 -11    1.50   10.99
   0   2  11    1.30    9.54
   0   3 -11   18.72   12.35
   0   3  11   14.26   11.46
   0  -3 -11   26.05   13.30
   0   3 -11    5.04   11.18
   0  -3 -11   13.82   12.81
  -1  -1   0    1.92    0.64
   1  -1   0    0.54    0.74
   1   1   0    1.11    0.93
   1   1   0    1.86    0.66
  -1   1   0    0.03    0.63
   1  -1   0    0.32    0.66
   1   1   0   -0.43    0.54
  -1   1   0    1.10    0.79
  -1  -1   0   -0.60    0.54
   1  -1   0    1.67    0.64
  -1  -1   0    0.52    0.60
   1  -1   0    1.32    0.78
  -1  -2   0    6.26    2.05
  -1  -2   0    9.54    1.73
   1   2   0    1.79    1.80
  -1  -2   0    3.01    1.53
  -1   2   0    5.77    1.61
   1   2   0    3.83    1.23
  -1   2   0    7.04    1.38
  -1  -2   0    4.09    1.26
   1   2   0    1.80    1.40
  -1   2   0    4.16    1.75
   1  -2   0    2.00    1.65
   1  -2   0    4.62    0.71
   1  -2   0    3.81    1.28
   1   2   0    2.31    1.30
   1   2   0    5.57    1.38
   1  -2   0    3.56    1.58
  -1   2   0    6.91    0.75
   1  -2   0    6.72    1.72
  -1  -2   0    2.81    1.23
  -1  -3   0    2.66    2.25
   1   3   0    4.59    1.89
  -1   3   0    0.08    2.39
  -1   3   0    3.51    1.83
   1  -3   0   -0.35    1.87
   1   3   0    2.79    1.59
   1   3   0    1.93    1.82
   1  -3   0    0.11    2.35
   1  -3   0    1.24    0.92
   1  -3   0    4.33    2.37
  -1  -3   0   -0.46    2.03
   1   3   0    1.35    2.52
  -1  -3   0    2.81    2.33
  -1  -3   0    0.51    1.32
   1  -3   0    0.57    1.55
  -1   3   0    4.63    1.65
  -1   3   0    0.94    1.81
  -1  -3   0    1.74    1.65
   1   3   0    1.56    1.58
  -1   3   0    2.25    0.95
   1   4   0    8.80    2.97
  -1  -4   0   14.25    3.74
  -1   4   0   14.20    3.21
  -1   4   0   10.71    1.61
   1   4   0   13.25    2.49
   1  -4   0   10.19    2.76
  -1  -4   0   10.65    2.76
   1   4   0   21.36    2.93
  -1   4   0    7.71    3.11
  -1  -4   0   16.95    3.84
  -1  -4   0    8.24    2.15
   1   4   0   11.67    3.45
   1  -4   0    8.71    1.53
   1  -4   0    8.04    3.22
  -1   4   0    7.03    2.57
   1   5   0    2.34    2.85
  -1   5   0    2.07    2.76
  -1  -5   0    0.62    3.29
   1   5   0    1.56    3.33
   1   5   0    1.09    2.74
  -1  -5   0    1.65    2.26
   1   5   0    0.81    3.14
  -1   5   0    2.20    3.36
  -1  -5   0    0.15    3.67
  -1   5   0    1.56    1.79
   1  -5   0    1.58    1.59
  -1   5   0   -0.41    3.21
   1  -5   0    0.23    3.28
   1  -5   0    2.81    3.64
   1   6   0    1.37    4.21
  -1  -6   0    2.76    2.70
  -1   6   0    5.96    4.51
  -1  -6   0    3.54    5.01
   1   6   0    0.68    3.65
   1  -6   0    1.29    4.77
  -1   6   0    2.61    3.57
  -1   6   0    5.48    4.34
   1  -6   0    3.26    1.87
   1   6   0    0.19    4.08
  -1   7   0    2.03    5.67
   1   7   0    2.54    5.15
   1   7   0   -0.27    4.51
  -1   7   0   -0.16    5.34
  -1   7   0    4.69    4.56
   1   7   0    4.28    5.26
  -1  -7   0    3.71    6.51
   1  -7   0    1.92    5.99
   1  -8   0    9.37    7.94
  -1   8   0    8.14    7.13
  -1  -8   0   12.90    7.82
   1   8   0   10.52    6.91
  -1   8   0   12.73    7.73
  -1   9   0    4.69    8.32
  -1   9   0   -1.75    9.58
   1  -9   0   -4.45    8.90
   1   9   0    1.85    8.68
  -1  -9   0   -3.27    9.25
   1   9   0   -0.78    8.21
  -1 -10   0    1.96   11.72
  -1  10   0    5.56   11.62
   1 -10   0    0.82   11.55
   1  10   0    3.35   11.92
   1  10   0    5.27   10.46
  -1  10   0    5.14   10.63
   1   0  -1 1519.59   34.92
   1   0  -1 1469.15   34.48
  -1   0  -1 1498.09   34.53
   1   0   1 1502.03   35.46
  -1   0   1 1464.79   35.76
  -1   0   1 1418.91   35.12
   1   0   1 1467.87   35.80
   1   0  -1 1495.96   35.39
  -1   0  -1 1432.02   35.44
  -1   0  -1 1465.19   35.28
   1   0   1 1432.17   35.29
   1   0  -1 1487.03   35.90
  -1   0   1 1407.42   34.45
  -1  -1   1 1259.84   30.02
  -1   1   1 1204.89   30.00
   1   1  -1 1253.09   30.03
   1  -1  -1 1232.23   30.03
   1  -1  -1 1214.35   30.83
   1   1   1 1250.05   30.43
  -1  -1   1 1234.48   29.70
   1   1  -1 1270.75   31.24
   1  -1   1 1264.35   30.08
   1  -1  -1 1328.83   30.49
  -1  -1  -1 1266.02   30.88
   1   1   1 1251.17   30.35
   1  -1   1 1233.38   30.97
   1  -1   1 1223.77   30.52
   1  -1  -1 1248.03   30.18
  -1  -1  -1 1221.38   29.36
  -1  -1  -1 1254.54   30.36
   1   1   1 1244.46   30.13
  -1  -1   1 1284.70   30.98
  -1   1  -1 1240.42   30.56
  -1   1  -1 1277.76   31.02
   1  -1  -1 1208.26   30.88
  -1   1   1 1207.37   29.51
  -1   1  -1 1299.10   30.12
  -1  -1   1 1285.65   30.24
   1  -1   1 1249.59   30.60
  -1  -1   1 1232.06   31.16
   1  -1   1 1212.07   29.88
   1   1  -1 1275.14   31.01
   1   1   1 1237.63   30.84
   1  -1  -1 1264.35   29.32
   1   1  -1 1099.53   30.16
  -1  -1  -1 1259.65   30.42
  -1  -1  -1 1226.75   30.11
   1  -1   1 1189.98   30.64
  -1   2   1 2744.39   67.04
  -1  -2  -1 2730.12   65.43
  -1   2  -1 2781.67   66.30
  -1   2  -1 2718.57   67.61
  -1  -2   1 2820.72   66.23
   1  -2  -1 2845.36   67.09
   1  -2   1 2802.39   66.23
   1  -2  -1 2767.62   65.44
   1   2  -1 2729.83   68.25
   1   2  -1 2739.45   66.43
  -1  -2  -1 2832.34   68.18
   1   2   1 2665.65   67.97
   1   2   1 2785.64   66.94
   1   2  -1 2748.84   66.21
  -1  -2   1 2771.74   66.29
  -1  -2  -1 2802.65   66.92
  -1  -2   1 2706.05   67.94
   1  -2  -1 2706.59   67.92
   1   2   1 2763.47   66.75
  -1   2  -1 2807.10   67.03
   1   2  -1 2910.09   68.14
   1  -2   1 2760.59   68.00
   1  -2  -1 2800.79   66.22
   1  -2   1 2793.63   66.90
   1   2  -1 2701.68   66.26
  -1  -2   1 2710.43   66.15
   1  -2  -1 2794.91   66.73
  -1   2   1 2750.51   67.94
  -1  -2  -1 2741.03   66.57
  -1   2   1 2838.97   65.48
   1  -2   1 2793.29   67.79
  -1   2   1 2754.85   66.21
   1   2   1 2823.42   65.51
  -1   2  -1 2799.54   68.08
  -1  -2   1 2888.34   68.43
  -1   2   1 2631.56   66.91
  -1   2  -1 2767.44   65.77
   1   3  -1  154.48    5.97
   1   3   1  180.30    5.39
   1  -3  -1  173.32    6.27
  -1   3   1  175.45    5.62
  -1  -3  -1  175.08    5.97
  -1   3   1  164.76    7.37
  -1   3   1  174.45    5.24
   1  -3  -1  165.00    5.19
   1  -3   1  155.68    7.08
   1  -3  -1  172.17    7.09
   1   3   1  193.30    6.36
  -1  -3  -1  174.62    6.25
   1   3  -1  173.33    6.33
  -1  -3   1  158.23    6.99
   1   3  -1  166.59    7.74
  -1  -3   1  170.41    5.57
   1  -3   1  174.61    7.11
  -1   3  -1  132.82    8.46
  -1   3   1  173.39    6.98
   1  -3  -1  163.71    5.47
   1   3   1  169.19    6.15
  -1  -3  -1  167.18    7.03
   1   3   1  148.88    7.39
  -1   3  -1  184.38    7.03
   1   3  -1  180.01    6.99
  -1   3  -1  152.93    5.01
  -1  -3  -1  170.41    5.39
   1   3  -1  178.36    6.64
   1  -3  -1  167.81    7.31
  -1  -3  -1  175.29    7.31
  -1   3  -1  179.91    6.69
  -1  -3   1  169.49    7.64
  -1   3  -1  171.74    6.85
   1   3   1  175.78    6.85
  -1   3   1  179.37    6.28
   1  -4  -1  767.04   22.07
   1   4   1  750.52   21.43
  -1   4  -1  758.69   21.32
   1  -4  -1  773.05   19.42
  -1  -4  -1  744.84   20.52
   1   4  -1  784.25   21.39
   1   4   1  779.75   20.60
  -1  -4   1  706.46   21.05
   1  -4  -1  727.25   19.58
   1  -4  -1  734.52   20.60
   1  -4   1  721.11   21.00
   1  -4   1  761.92   22.09
  -1   4   1  767.07   19.65
   1   4  -1  743.65   19.74
   1   4   1  769.00   19.80
   1  -4   1  743.41   21.54
  -1  -4  -1  723.95   19.71
  -1   4  -1  722.82   18.60
  -1  -4  -1  781.29   22.35
  -1   4   1  746.54   19.40
   1   4  -1  757.35   20.91
  -1  -4  -1  765.59   19.97
  -1   4   1  739.48   21.59
  -1   4   1  796.77   20.68
  -1  -4   1  746.06   20.90
  -1   4  -1  786.64   21.48
   1   4  -1  782.52   21.43
  -1  -4   1  764.77   19.48
  -1  -4   1  777.92   22.57
  -1   4  -1  741.77   21.32
   1   4   1  745.71   20.01
  -1  -5  -1 1061.80   30.30
   1   5   1 1070.28   27.21
   1  -5  -1  961.81   26.91
   1  -5  -1 1065.52   30.02
   1   5  -1 1023.23   28.88
  -1   5  -1 1016.40   25.30
  -1   5   1 1049.71   27.04
  -1   5  -1 1088.60   28.82
  -1   5   1 1077.39   29.50
   1  -5  -1 1031.76   26.33
  -1  -5   1 1069.80   30.51
   1   5   1  951.46   27.77
  -1   5   1 1055.46   28.20
   1   5   1 1037.78   29.05
   1   5  -1 1040.31   28.61
  -1   5   1 1002.74   26.30
   1   5   1 1079.37   28.26
   1  -5   1 1075.83   30.08
  -1   5  -1 1049.00   29.15
   1   5  -1  993.09   26.60
  -1  -5   1 1064.52   26.41
   1   5  -1 1076.83   28.83
  -1  -5  -1 1035.39   27.06
  -1  -5  -1  997.49   27.12
  -1   5  -1 1050.21   29.04
   1  -6   1  843.64   26.13
  -1  -6  -1  776.39   22.24
   1   6  -1  854.03   24.53
   1   6   1  820.47   25.28
   1   6  -1  864.32   25.32
  -1   6  -1  815.95   24.98
  -1   6  -1  826.90   25.38
  -1   6   1  786.04   24.13
   1  -6  -1  847.54   21.58
   1   6   1  784.20   22.51
  -1   6   1  830.81   22.53
  -1  -6  -1  854.80   26.44
  -1  -6   1  807.11   21.47
  -1   6  -1  835.23   24.39
   1   6  -1  819.06   24.65
  -1   6   1  799.18   25.29
   1   6   1  813.50   24.26
  -1  -6   1  805.06   26.57
   1  -6  -1  803.62   25.98
  -1   7   1    8.99    6.26
   1   7   1   13.12    5.66
   1   7   1    6.79    4.23
  -1   7   1   13.25    5.74
   1   7  -1   11.09    5.88
   1   7  -1    7.71    5.81
  -1   7  -1    4.36    6.22
  -1  -7  -1    6.81    6.75
  -1  -7   1    7.51    6.74
  -1   7  -1    5.10    5.84
   1   7   1    5.36    5.70
  -1   7  -1   14.65    5.74
   1   7  -1    6.63    5.32
   1  -7   1    4.45    6.07
   1  -7  -1    8.92    6.06
   1   8  -1  141.17   10.88
  -1   8  -1  135.39   11.61
   1   8  -1  111.61   10.75
   1  -8   1  134.78   13.02
   1   8   1  150.56   11.22
   1  -8  -1  161.09   13.80
  -1   8  -1  148.73   10.93
  -1  -8  -1  118.77   12.40
  -1  -8   1  152.00   13.44
   1   8  -1  145.79   12.28
   1   8   1  142.54   12.18
  -1   8   1  137.58   11.16
  -1   8   1  135.80   12.22
  -1   9  -1  540.28   24.78
  -1   9  -1  547.36   23.16
   1  -9  -1  521.01   25.09
  -1  -9   1  545.01   25.41
   1   9  -1  531.70   23.70
   1   9  -1  560.81   24.27
   1   9   1  514.14   23.30
  -1   9   1  530.84   22.72
  -1  -9  -1  503.76   25.38
   1   9   1  532.71   22.65
   1  -9   1  528.76   24.78
  -1   9   1  501.60   23.48
  -1  10  -1  116.54   14.47
  -1 -10   1  127.78   16.03
   1 -10   1  111.10   15.56
   1  10   1  135.97   14.44
   1  10   1  120.51   14.39
   1  10  -1  118.43   15.85
  -1 -10  -1   98.08   15.64
  -1  10   1  135.29   15.92
  -1  10   1  144.10   14.81
   1  10  -1  100.85   13.83
  -1  10  -1  128.02   15.92
   1 -10  -1  122.59   15.96
  -1   0  -2  139.79    5.10
   1   0   2  153.00    4.57
  -1   0  -2  151.56    5.17
   1   0   2  153.99    5.17
  -1   0  -2  165.72    5.42
  -1   0   2  151.49    4.84
  -1   0   2  152.59    4.50
  -1   0   2  159.76    5.15
  -1   0  -2  150.74    4.51
   1   0  -2  155.25    4.50
   1   0  -2  157.16    5.13
   1   0  -2  156.09    5.48
  -1   0   2  155.09    5.54
   1   0   2  140.79    5.30
   1   0  -2  149.59    5.55
  -1   0   2  149.15    5.45
   1   0  -2  155.89    4.90
   1   0   2  151.14    5.22
   1   0   2  157.86    5.13
  -1   0  -2  156.72    5.32
   1  -1  -2  281.00    8.50
   1   1   2  271.00    7.05
   1   1  -2  288.81    8.23
   1   1  -2  276.48    7.88
   1   1  -2  289.78    9.14
   1  -1  -2  294.22    8.55
   1   1  -2  296.65    8.60
   1  -1   2  273.20    8.48
   1  -1   2  274.37    8.29
  -1   1   2  286.97    8.64
  -1  -1  -2  298.44    8.65
  -1  -1   2  268.08    9.00
   1   1   2  288.79    8.63
   1  -1  -2  311.03    7.77
  -1   1  -2  262.12    8.63
   1  -1   2  286.28    8.31
  -1   1  -2  288.22    8.36
   1  -1   2  285.22    8.84
  -1  -1  -2  294.96    8.71
  -1   1   2  290.19    8.84
   1  -1   2  268.66    8.52
  -1   1  -2  281.05    8.23
  -1  -1  -2  288.06    7.73
  -1   1   2  278.39    7.66
   1   1  -2  272.42    8.69
   1   1   2  275.75    7.02
   1   1   2  277.79    8.58
  -1  -1   2  279.57    7.71
  -1   1  -2  285.36    8.79
  -1  -1  -2  287.65    8.65
   1  -1  -2  290.49    8.89
  -1  -1  -2  281.26    8.66
  -1  -1   2  298.29    8.82
   1   1   2  292.29    7.79
  -1  -1   2  286.90    8.26
   1   1  -2  302.59    8.63
  -1   2   2 8096.56  185.35
   1  -2   2 7983.91  188.94
   1   2   2 7950.36  189.21
  -1  -2   2 8014.77  188.41
   1  -2  -2 8004.50  189.14
   1  -2   2 7897.15  187.66
   1  -2  -2 8159.68  189.07
  -1  -2   2 8008.38  188.10
  -1   2   2 7640.99  191.79
   1  -2  -2 8008.43  191.96
  -1  -2   2 7796.80  192.68
  -1  -2  -2 8164.34  191.96
   1   2  -2 8102.67  187.03
   1   2   2 7894.13  190.74
  -1  -2  -2 8118.41  189.26
  -1  -2  -2 7915.42  189.14
   1  -2   2 8252.41  191.75
  -1   2   2 8029.49  189.05
   1   2  -2 7998.44  192.22
   1  -2   2 7666.39  192.70
   1  -2   2 7911.21  189.28
  -1  -2   2 7661.83  187.49
  -1  -2  -2 7870.25  185.39
  -1   3  -2    2.99    3.39
  -1  -3   2    1.78    1.51
  -1  -3   2    6.10    2.85
  -1  -3  -2    2.77    1.74
   1   3  -2    0.61    2.29
   1  -3   2    0.93    2.85
  -1   3   2    7.71    2.36
  -1  -3   2    1.06    2.80
   1  -3   2    0.96    2.40
  -1   3  -2    4.97    2.66
  -1   3  -2    1.64    1.86
  -1   3   2   -0.66    1.45
   1   3  -2    5.45    2.30
   1  -3  -2    5.88    2.60
   1   3  -2    0.58    2.25
   1   3   2    2.28    2.10
  -1   3  -2    2.00    1.47
   1   3   2    1.55    1.68
  -1   3   2    1.20    2.25
   1  -3  -2    0.69    1.72
  -1  -3  -2    1.84    2.39
  -1  -3  -2    5.43    3.66
  -1  -3   2    0.05    2.09
   1  -3  -2   -0.21    1.62
  -1  -3  -2    2.42    1.92
   1   3  -2    3.48    3.77
  -1   3  -2   -0.49    2.10
  -1   4  -2   71.00    5.86
  -1  -4  -2   52.48    4.18
   1   4  -2   58.77    4.74
  -1  -4   2   67.21    5.11
   1  -4  -2   69.06    4.77
  -1  -4   2   64.16    3.91
   1   4  -2   77.60    5.77
  -1   4  -2   56.58    4.34
   1   4   2   59.87    2.62
   1  -4   2   57.66    5.70
  -1   4  -2   59.18    3.60
  -1   4   2   62.90    4.52
  -1  -4  -2   64.46    4.59
   1  -4   2   75.03    6.12
  -1  -4   2   80.45    6.93
   1   4  -2   70.84    5.34
   1   4   2   41.11    4.31
  -1   4   2   58.87    4.45
  -1  -4  -2   64.14    5.92
   1   4   2   68.04    4.57
  -1   4  -2   65.93    5.85
   1   4   2   76.63    6.01
   1  -4  -2   55.89    4.17
  -1   4  -2   62.15    5.20
  -1   4   2   74.22    6.22
   1  -4  -2   54.64    5.21
   1   4  -2   63.70    5.56
  -1   5  -2  466.95   15.63
  -1  -5  -2  461.97   15.02
   1  -5  -2  445.23   16.11
   1   5   2  439.55   15.49
   1  -5   2  421.45   16.04
  -1   5   2  426.97   15.70
  -1  -5   2  444.64   12.63
  -1   5   2  427.71   13.65
   1  -5  -2  440.11   11.81
   1   5   2  447.16   14.08
  -1  -5  -2  442.71   16.21
  -1   5   2  420.50   11.60
  -1  -5   2  450.41   16.54
  -1   5  -2  441.10   15.20
   1  -5  -2  436.98   13.14
  -1   5  -2  426.58   11.89
   1   5   2  443.19   11.91
   1   5  -2  454.71   15.05
  -1   5  -2  435.27   12.38
   1   5  -2  446.54   15.58
  -1   5   2  458.38   13.92
  -1   5  -2  427.59   15.53
   1   5   2  430.87   11.69
   1   5  -2  446.95   15.25
   1   5  -2  440.63   13.90
   1   5   2  419.07   14.19
   1   6   2 2050.26   54.42
   1  -6  -2 2059.97   51.18
  -1  -6   2 2039.82   50.45
  -1  -6  -2 2054.99   51.82
  -1   6  -2 1991.11   53.88
   1   6  -2 2048.74   54.53
  -1   6   2 2014.43   50.55
   1  -6  -2 2044.53   55.72
   1   6  -2 2049.18   54.10
  -1   6  -2 2148.85   54.48
  -1   6  -2 2080.75   54.64
   1   6  -2 2092.93   53.69
  -1   6   2 2026.82   52.08
   1   6   2 2000.63   50.74
   1   6   2 2075.73   52.30
  -1   6   2 2112.36   54.91
   1  -6   2 2154.61   55.99
  -1  -6   2 2006.45   55.98
  -1  -6  -2 2020.34   55.78
   1   7  -2   30.99    7.91
  -1   7   2   42.49   11.92
  -1  -7  -2   36.32    7.58
  -1   7  -2   31.80    6.59
   1   7  -2   28.73    6.46
   1   7  -2   36.46    7.47
   1   7   2   30.56    6.23
  -1  -7  -2   40.46    5.44
   1  -7   2   29.92    7.68
  -1   7  -2   32.69    8.59
   1   7   2   35.75    7.26
  -1   7   2   20.08    5.84
  -1   7  -2   24.62    7.37
  -1  -7   2   36.36    8.11
   1  -8   2    8.68    7.98
   1   8  -2    1.57    6.94
   1   8   2    3.49    7.14
  -1  -8   2    4.29    8.29
  -1   8  -2    5.89    7.65
   1  -8  -2    3.17    7.36
  -1  -8  -2    7.32    8.09
  -1   8  -2    2.87    6.80
   1   8  -2    6.17    6.69
   1   8   2    0.39    6.74
  -1   8   2    2.52    7.31
   1   8  -2    9.47    8.23
  -1   8   2    3.02    6.60
  -1   8  -2    2.02    8.03
   1  -9  -2  149.27   14.71
  -1   9   2  148.26   12.96
   1   9  -2  143.52   12.86
  -1   9  -2  134.84   12.24
   1   9  -2  142.85   13.89
  -1   9   2  121.25   12.80
  -1   9  -2  164.60   14.45
  -1  -9  -2  190.36   16.11
   1   9  -2  167.09   14.57
   1   9   2  123.90   12.10
   1  -9   2  149.02   14.97
  -1  -9   2  161.08   15.61
  -1   9  -2  142.73   14.47
   1   9   2  142.60   13.67
  -1  10  -2  393.29   23.87
   1 -10  -2  403.27   24.75
  -1  10  -2  391.41   25.83
   1  10  -2  434.19   24.22
   1 -10   2  428.04   26.22
   1  10   2  439.93   23.69
  -1 -10  -2  451.56   25.67
  -1 -10   2  448.81   26.74
  -1  10   2  436.10   24.11
  -1   0  -3  210.37    7.47
   1   0   3  213.07    6.31
   1   0  -3  219.92    7.05
  -1   0   3  212.18    7.74
  -1   0  -3  211.34    7.40
  -1   0  -3  206.44    6.22
   1   0   3  206.74    7.46
   1   0   3  212.73    7.22
   1   0  -3  198.54    7.40
  -1   0   3  207.91    7.23
  -1   0  -3  214.47    7.48
   1   0   3  221.80    7.35
  -1   0   3  206.62    7.73
   1   0  -3  210.03    6.23
  -1   0   3  203.56    6.16
   1   0  -3  209.96    8.26
  -1   0   3  216.54    6.93
   1   0  -3  227.93    7.32
  -1   0  -3  208.33    7.12
   1   0   3  217.56    7.32
   1   1  -3 1215.53   30.06
  -1   1  -3 1145.78   30.69
  -1   1  -3 1248.10   30.15
  -1  -1  -3 1235.23   30.99
  -1   1  -3 1165.86   30.72
  -1  -1  -3 1221.30   30.40
   1  -1   3 1221.09   30.06
   1   1  -3 1220.89   31.07
  -1   1  -3 1228.80   31.56
   1  -1   3 1162.83   30.57
   1  -1  -3 1251.62   30.42
  -1   1   3 1267.80   31.69
   1  -1  -3 1192.70   31.56
  -1  -1   3 1181.82   31.68
   1   1   3 1251.22   31.00
   1   1   3 1198.27   30.41
  -1  -1   3 1188.77   29.97
  -1  -1   3 1187.25   31.40
   1   1   3 1191.18   31.08
   1   1   3 1208.72   28.54
   1  -1   3 1204.23   31.07
  -1   1   3 1177.02   31.02
  -1   1   3 1252.81   30.81
   1  -1  -3 1211.29   31.11
   1   1  -3 1249.39   31.04
  -1   1   3 1215.45   30.34
   1   1  -3 1184.23   30.06
   1  -1   3 1157.07   31.46
  -1  -1  -3 1199.71   31.04
  -1  -1   3 1194.38   29.91
   1   1  -3 1193.99   31.51
  -1  -1  -3 1174.37   28.46
  -1  -1  -3 1255.25   31.43
   1  -2  -3    8.00    1.26
   1   2  -3    8.04    2.31
  -1   2   3    8.50    1.35
  -1   2   3    5.81    2.73
   1   2  -3    9.29    2.57
   1  -2   3    7.22    2.39
   1  -2   3    7.31    2.48
   1  -2   3    3.97    2.59
  -1  -2   3    5.92    2.74
  -1  -2   3    4.64    2.67
   1  -2  -3    4.53    2.28
  -1   2  -3   13.39    3.45
  -1  -2  -3    8.00    2.85
   1   2  -3    3.47    2.69
   1   2   3    8.85    2.96
  -1  -2   3    4.45    2.76
  -1   2  -3    4.52    3.20
  -1  -2   3   11.05    2.12
   1   2   3    8.53    1.49
   1  -2   3    6.26    2.63
   1   2  -3    6.10    2.56
   1  -2  -3   12.42    3.46
  -1   2  -3    6.39    2.43
  -1  -2  -3    9.94    2.48
   1  -2  -3    5.41    2.86
   1   2   3    8.93    2.63
  -1  -2  -3   10.70    3.00
   1  -2  -3   15.02    2.67
   1  -2   3    4.02    2.77
   1   2  -3    4.72    2.46
  -1  -2  -3   14.83    1.48
   1   2  -3   12.50    4.08
  -1   2  -3    5.80    2.44
  -1   2  -3    5.89    2.06
  -1   3  -3  719.13   19.44
  -1   3  -3  734.72   20.77
  -1  -3  -3  737.78   21.44
  -1   3  -3  751.38   21.47
  -1  -3  -3  710.83   20.30
  -1  -3   3  707.03   19.57
  -1   3  -3  717.12   19.57
   1   3  -3  719.20   19.88
  -1  -3  -3  721.49   18.12
   1   3  -3  768.54   20.83
  -1   3  -3  725.02   21.51
  -1   3   3  743.38   21.04
   1   3   3  701.63   20.52
   1   3   3  720.85   20.93
  -1   3   3  727.95   20.44
   1  -3   3  724.56   20.83
  -1  -3   3  741.54   19.98
   1  -3  -3  725.91   20.22
   1   3   3  743.86   18.22
  -1   3   3  715.10   17.96
   1  -3  -3  746.39   21.50
   1  -3  -3  709.36   17.99
   1   3  -3  726.21   21.25
  -1  -3   3  742.56   21.91
   1  -3   3  721.86   21.22
  -1  -4  -3  251.38   10.65
   1   4  -3  231.61   10.24
  -1   4  -3  252.78   10.49
  -1   4  -3  204.87    9.92
   1   4   3  247.17   10.32
   1  -4  -3  225.61    7.82
   1   4  -3  212.89    9.56
  -1   4  -3  229.98    8.74
  -1   4   3  226.42    7.62
   1   4   3  223.76    7.83
  -1  -4   3  224.46   10.81
  -1  -4   3  232.97    9.67
   1  -4   3  217.14   10.23
   1  -4  -3  220.74    8.94
  -1   4   3  223.51   10.07
  -1  -4  -3  216.94    7.83
   1  -4  -3  245.83   10.32
   1  -4   3  214.25   10.27
  -1  -4  -3  233.52    9.20
   1  -4   3  248.59   10.48
   1   4  -3  241.19    8.73
   1   4  -3  231.55   10.14
  -1   4  -3  225.64    8.01
  -1  -4   3  231.35    9.30
   1   5  -3  259.34   11.73
   1   5  -3  224.79   11.14
  -1   5  -3  264.41   11.80
  -1  -5  -3  225.25    9.73
   1  -5  -3  228.15    9.72
  -1   5  -3  247.02   11.46
   1   5  -3  262.28   11.92
  -1  -5  -3  257.04   10.11
  -1   5  -3  242.57    8.56
   1   5   3  238.17   11.70
   1   5  -3  247.52    9.39
  -1   5  -3  233.01   10.46
   1  -5   3  266.97   12.19
  -1   5   3  250.79    9.23
   1   5   3  259.45    9.46
   1  -5  -3  240.37   11.96
  -1   5   3  257.15   12.09
   1  -5   3  255.12   12.18
  -1  -5   3  261.66   12.69
   1  -5  -3  259.29    9.90
  -1  -5  -3  262.50   12.24
  -1   6  -3   11.13    5.29
  -1   6  -3    6.82    4.39
   1   6  -3    9.62    5.53
  -1  -6   3    2.42    5.72
   1   6  -3    6.36    3.66
   1  -6   3    6.05    5.71
  -1   6   3   10.66    4.19
  -1   6   3    9.70    5.68
   1  -6  -3    6.54    3.80
   1   6  -3    8.52    5.30
   1  -6  -3    6.84    5.36
   1   6   3   14.28    4.55
  -1  -6  -3    8.59    4.21
  -1   6  -3    5.03    5.48
   1   6  -3    2.35    4.83
   1   6   3   10.34    5.50
  -1  -6  -3    4.26    5.34
   1   7  -3  215.13   13.68
   1   7   3  209.85   11.69
   1   7   3  239.09   14.04
  -1   7   3  216.49   11.72
  -1  -7  -3  250.32   14.61
  -1   7  -3  230.79   13.91
  -1   7  -3  210.90   14.01
  -1   7  -3  229.57   14.60
  -1  -7   3  216.79   15.23
  -1   7   3  233.14   14.09
   1   7  -3  217.15   13.97
   1   7  -3  217.44   13.69
   1  -7   3  237.71   15.21
  -1  -7  -3  217.00   10.95
   1  -7  -3  212.01   14.28
   1   8  -3   26.92    8.66
  -1   8  -3   40.43    8.82
  -1   8   3   32.73    7.83
   1   8   3   29.60    7.74
   1  -8   3   14.42    8.78
  -1  -8   3   20.39    9.31
   1   8   3   39.42    9.07
  -1   8   3   34.55    9.45
  -1   8  -3   22.39    8.70
   1  -8  -3   37.21    9.50
  -1  -8  -3   32.80    9.42
   1   8  -3   37.42    9.70
   1   8  -3   32.31    8.33
  -1   8  -3   30.28    9.84
   1  -9   3  105.68   13.86
  -1   9  -3   98.39   12.53
   1   9  -3  132.67   14.13
   1   9  -3  122.37   12.99
  -1  -9   3  114.79   14.81
  -1  -9  -3  112.90   13.96
   1   9   3  125.12   13.68
  -1   9   3  142.26   14.59
  -1   9  -3  129.37   13.08
   1  -9  -3  118.71   14.06
   1  10   3   -4.26   10.85
  -1  10   3   -0.44   10.95
   1 -10   3    5.31   12.89
  -1 -10  -3  -13.66   21.78
  -1 -10   3    7.37   12.40
  -1   0   4 3185.63   76.09
  -1   0  -4 3248.58   76.21
  -1   0  -4 3246.73   79.07
   1   0  -4 3340.37   79.32
  -1   0  -4 3176.94   79.60
  -1   0   4 3122.29   80.99
   1   0   4 3118.19   79.60
  -1   0   4 3126.91   79.51
  -1   0  -4 3060.99   78.31
   1   0   4 3301.37   78.55
  -1   0  -4 3260.83   79.75
   1   0  -4 3247.63   78.05
   1   0   4 3144.85   76.18
   1   0  -4 3278.98   76.22
   1   0  -4 3157.26   80.08
   1   0   4 3360.29   79.60
  -1   0   4 3265.14   77.99
   1   0  -4 3284.17   79.80
   1   1   4   17.35    1.58
  -1  -1   4   18.61    2.60
  -1   1   4   18.67    1.37
  -1   1  -4   15.95    3.22
   1   1  -4   17.04    3.13
  -1  -1  -4    9.49    3.70
   1   1  -4   16.17    4.50
   1   1   4   16.64    3.06
   1  -1  -4   17.65    3.32
  -1   1   4   17.25    3.64
  -1   1   4   11.48    2.61
  -1   1  -4   17.09    3.83
   1  -1   4   14.11    3.09
   1   1  -4   14.20    2.65
   1   1  -4   21.08    3.42
  -1   1  -4   20.79    3.79
  -1   1  -4   16.93    3.26
   1  -1   4   18.54    3.21
  -1   1  -4   21.18    2.83
   1   1   4   17.41    2.97
   1  -1  -4   16.46    2.55
  -1  -1   4   13.27    3.60
  -1  -1  -4   14.40    3.14
   1  -1  -4   16.58    1.36
  -1  -1  -4   17.87    1.46
   1   1  -4   10.13    2.93
  -1   1   4   13.49    3.11
  -1  -1  -4   22.93    3.54
   1  -1   4   15.82    2.90
   1  -1  -4   20.16    3.67
  -1  -1  -4   16.13    2.54
   1   2   4 1640.26   41.80
   1   2  -4 1605.69   42.55
  -1   2  -4 1618.94   40.79
  -1   2  -4 1623.48   42.57
   1  -2   4 1628.74   41.06
  -1   2  -4 1655.72   41.21
  -1  -2  -4 1606.97   40.05
  -1   2   4 1543.61   39.94
  -1  -2  -4 1603.15   41.65
  -1   2   4 1661.10   41.66
   1  -2  -4 1613.21   42.50
  -1  -2   4 1637.33   42.84
   1   2  -4 1663.41   41.54
  -1   2  -4 1591.70   42.12
  -1  -2   4 1622.83   40.15
   1   2  -4 1558.79   40.71
   1  -2   4 1513.37   41.06
   1  -2  -4 1582.63   41.54
   1   2   4 1617.74   40.17
   1   2  -4 1650.75   40.81
  -1  -2  -4 1584.91   42.24
  -1   2  -4 1616.26   41.68
   1  -2   4 1678.42   42.16
   1  -2  -4 1570.44   40.01
  -1  -3   4   66.12    6.61
   1   3   4   79.60    6.35
  -1  -3  -4   63.25    2.72
   1   3  -4   65.75    5.35
  -1  -3   4   62.84    5.05
   1  -3   4   61.77    6.03
  -1   3  -4   64.20    5.60
  -1   3   4   48.94    5.09
  -1   3  -4   86.76    6.78
   1  -3  -4   77.02    5.89
   1  -3  -4   79.19    6.77
  -1  -3   4   67.43    5.12
   1   3   4   62.87    2.91
   1   3  -4   58.19    5.37
  -1  -3  -4   68.31    6.31
   1   3  -4   79.54    6.45
  -1   3  -4   75.51    6.11
  -1   4   4 1656.15   39.07
  -1  -4   4 1640.20   42.02
  -1  -4   4 1560.01   41.60
  -1   4  -4 1617.97   41.93
  -1  -4  -4 1669.96   42.88
   1   4  -4 1665.19   42.08
   1  -4  -4 1546.62   39.03
   1  -4   4 1707.72   43.19
   1  -4  -4 1643.49   42.56
  -1   4  -4 1645.20   43.16
   1   4  -4 1677.86   43.23
  -1  -4  -4 1573.97   39.24
   1   4   4 1614.28   39.27
   1   4  -4 1651.45   44.47
  -1  -4  -4 1647.77   44.55
   1   4   4 1595.37   43.59
   1  -4   4 1640.15   44.16
  -1  -4   4 1639.60   44.77
  -1   4  -4 1669.04   44.55
   1  -4  -4 1599.60   44.40
  -1   5  -4   47.01    6.74
   1   5  -4   48.93    5.16
  -1  -5  -4   39.22    6.15
   1   5   4   53.93    4.28
   1   5  -4   45.02    6.52
  -1  -5   4   41.42    5.66
   1  -5   4   54.08    7.12
   1  -5   4   55.39    6.98
  -1   5  -4   48.56    5.18
   1   5   4   50.82    6.87
   1  -5  -4   48.96    7.09
  -1   5  -4   47.15    6.47
  -1   5   4   36.22    6.19
  -1  -5  -4   46.22    5.70
   1  -5  -4   48.85    5.55
   1   5  -4   46.87    6.80
  -1  -5   4   58.39    7.77
  -1   5   4   50.77    4.07
   1  -6   4  747.86   24.68
  -1   6  -4  739.20   25.13
   1  -6  -4  718.68   22.41
   1   6   4  803.02   32.44
  -1   6   4  759.11   21.56
   1  -6   4  774.29   25.50
   1   6   4  742.77   20.88
  -1  -6   4  710.90   25.74
   1   6  -4  701.11   24.83
  -1  -6  -4  770.27   22.97
  -1  -6   4  738.62   23.70
   1   6  -4  701.58   21.49
  -1  -7  -4  127.41    9.40
   1  -7   4  136.80   11.96
  -1   7   4  143.61   12.53
  -1  -7   4  151.79   11.86
   1  -7  -4  122.88    8.93
   1   7  -4  110.08   10.62
  -1   7  -4  137.22   11.74
  -1   7  -4  139.67   12.35
   1   7   4  112.98   11.13
   1  -7   4  104.58   10.79
  -1  -7  -4  134.83   12.73
   1  -7  -4  138.88   12.53
   1   7  -4  100.22   10.58
   1  -8  -4  490.17   22.74
  -1  -8   4  491.71   23.20
  -1   8  -4  470.45   22.16
   1  -8   4  501.01   22.59
   1  -8   4  506.23   23.02
  -1  -8  -4  475.79   23.27
  -1   8   4  452.69   21.95
   1   8  -4  514.86   22.44
  -1   8  -4  463.75   21.51
   1   8  -4  467.77   21.94
   1   8   4  473.89   22.81
   1  -9  -4  126.25   15.16
  -1   9   4  142.75   15.27
   1   9  -4  127.53   14.72
   1   9  -4  125.71   13.92
   1  -9   4  110.74   13.89
  -1   9  -4  109.84   13.35
  -1  -9   4  139.87   15.32
  -1   9  -4  109.48   13.49
   1   9   4  131.31   14.43
  -1  -9  -4   96.84   13.51
   1   0   5  520.67   14.63
   1   0  -5  590.57   17.59
  -1   0   5  526.23   17.16
  -1   0   5  528.12   15.95
   1   0  -5  520.27   16.41
   1   0  -5  548.00   14.60
  -1   0  -5  543.39   17.05
   1   0   5  525.85   16.39
  -1   0  -5  556.43   16.63
   1   0   5  547.71   16.89
   1   0  -5  527.55   17.39
  -1   0   5  539.66   14.61
  -1   0  -5  517.88   14.49
   1   1  -5  512.44   16.53
   1   1  -5  579.88   17.70
   1  -1  -5  563.87   16.38
  -1   1   5  575.17   17.98
  -1  -1  -5  555.02   17.53
  -1   1  -5  561.48   16.00
  -1   1   5  515.04   16.33
  -1  -1   5  580.69   16.20
   1   1   5  588.52   17.68
   1  -1   5  560.19   16.74
   1  -1   5  478.39   15.82
   1   1  -5  570.16   16.01
  -1   1  -5  557.71   17.55
   1   1   5  539.83   14.00
   1   1   5  561.11   16.59
   1   1  -5  559.99   17.50
   1  -1  -5  568.97   17.70
  -1   1   5  569.40   17.03
  -1  -1   5  528.79   15.90
   1  -1  -5  536.48   13.76
   1  -1   5  583.27   17.45
  -1  -1  -5  544.01   13.87
  -1  -1  -5  583.32   16.43
   1   1   5  585.68   17.43
  -1   1  -5  538.34   17.24
  -1   1   5  544.16   13.77
  -1  -1   5  586.79   18.14
  -1   2   5  928.61   25.65
   1   2  -5  867.06   26.14
  -1  -2  -5  914.23   26.16
  -1  -2   5  899.19   24.02
   1   2  -5  852.81   24.73
   1   2  -5  913.44   25.60
  -1   2  -5  887.93   24.64
   1  -2   5  921.58   24.88
  -1  -2   5  872.93   26.50
   1  -2  -5  917.27   23.75
   1  -2   5  902.09   25.83
  -1   2  -5  911.47   26.34
   1   2  -5  925.19   24.82
   1   2   5  872.33   23.84
  -1   2   5  840.63   23.61
  -1  -2  -5  913.93   25.92
   1   2   5  891.29   25.69
  -1   2  -5  912.08   25.30
   1  -2  -5  891.53   25.75
  -1  -2  -5  877.17   23.66
   1  -2  -5  877.29   26.30
  -1   3  -5   26.92    4.70
   1   3  -5   16.11    4.23
   1  -3   5   26.77    5.11
   1  -3  -5   18.80    4.31
   1   3  -5   11.78    4.38
  -1   3  -5   31.79    5.52
   1   3   5   20.09    4.78
  -1  -3  -5   22.28    4.65
  -1  -3   5   23.61    4.75
  -1  -3   5   19.01    3.58
  -1  -3   5   15.56    5.21
  -1  -3  -5   14.49    4.59
   1   3   5   19.50    2.80
   1   3  -5   14.93    4.35
   1  -3  -5   33.35    5.73
  -1   3   5   17.24    4.44
   1  -3   5   21.32    4.32
   1  -3  -5   21.45    2.39
  -1   3  -5   35.01    4.75
  -1  -3  -5   25.79    2.53
  -1  -4   5  185.74    9.27
   1   4  -5  207.63   11.42
   1  -4   5  213.97   11.39
  -1   4  -5  190.68   11.06
  -1  -4  -5  210.79   10.67
  -1   4  -5  175.60   10.22
  -1   4   5  186.34   10.67
   1   4   5  174.29   10.62
   1  -4   5  173.79    9.63
   1  -4  -5  180.64   10.94
  -1   4  -5  200.68    9.58
   1   4  -5  189.10   10.56
  -1  -4   5  181.65   11.47
   1   4  -5  200.18    9.82
   1  -4  -5  195.90   10.02
  -1  -4  -5  181.67   10.80
  -1   5  -5  601.23   21.70
   1  -5   5  631.28   21.12
   1   5  -5  612.26   22.54
  -1  -5   5  632.61   19.99
   1   5  -5  627.77   21.90
  -1   5   5  641.67   22.40
   1   5  -5  670.47   20.16
   1  -5  -5  627.26   20.82
   1  -5  -5  658.52   22.80
  -1  -5  -5  618.24   22.84
  -1   5  -5  648.89   19.63
  -1  -5   5  634.99   23.05
  -1  -5  -5  672.22   21.45
   1  -5   5  677.49   22.72
   1   5   5  642.34   22.33
  -1  -6   5  268.99   15.30
   1  -6  -5  235.93   14.84
   1  -6   5  238.84   14.79
   1   6  -5  253.43   14.72
   1  -6  -5  252.84   13.15
  -1   6  -5  249.57   14.88
   1  -6   5  280.88   14.22
  -1   6  -5  268.71   14.89
  -1  -6   5  269.11   13.11
  -1   6   5  287.98   15.30
  -1  -6  -5  227.13   14.39
   1   6  -5  246.37   12.00
   1   6   5  235.29   14.58
  -1  -6  -5  249.74   12.93
   1   6  -5  230.88   14.39
  -1  -7   5    2.16    8.02
  -1   7  -5    3.17    7.79
   1   7   5    5.16    7.68
  -1   7  -5    4.78    7.11
   1  -7   5    7.31    7.75
   1   7  -5   -2.37    7.11
   1  -7  -5    5.58    6.29
   1   7  -5   -0.16    6.73
  -1  -7  -5    5.34    7.34
   1  -7   5   17.83    8.42
  -1   7   5    9.71    7.73
   1  -7  -5    8.29    7.48
  -1  -7  -5    6.00    6.43
   1  -8   5   15.57   10.30
  -1   8   5   30.46   10.16
  -1  -8  -5   25.10   10.09
   1   8  -5   18.54    9.32
  -1   8  -5   26.76    9.53
   1   8   5   17.63    9.78
  -1   8  -5   20.96    9.71
   1   8  -5   25.25    9.70
   1  -8  -5   24.16   10.49
  -1  -8   5   11.19   10.07
   1   9  -5  308.25   22.65
  -1  -9   5  285.84   21.03
  -1   9   5  311.34   21.51
   1   9   5  308.14   21.64
   1  -9  -5  308.88   21.66
  -1   9  -5  290.99   21.29
  -1   9  -5  284.79   21.73
   1   9  -5  279.48   20.85
  -1  -9  -5  226.76   19.29
   1  -9   5  259.05   19.70
   1   0   6 2379.49   57.61
  -1   0   6 2161.69   54.39
   1   0  -6 2282.66   58.57
   1   0   6 2249.27   55.58
  -1   0  -6 2270.08   58.46
   1   0  -6 2233.30   54.51
  -1   0  -6 2211.30   58.16
  -1   0  -6 2258.41   54.53
   1   0   6 2275.57   58.44
   1   0  -6 2208.14   58.12
  -1   0   6 2266.21   56.92
  -1   0   6 2219.17   58.82
  -1   1   6   11.76    2.11
   1  -1  -6   11.54    1.91
   1   1   6   12.70    2.37
  -1  -1  -6    9.80    3.64
   1   1  -6   13.36    4.40
  -1   1  -6    9.92    3.36
   1   1   6   13.66    4.28
  -1  -1  -6   14.95    4.66
  -1   1  -6   11.25    4.18
   1  -1  -6   13.35    3.69
   1   1  -6   20.24    3.83
   1   1   6   12.89    4.00
  -1   1   6   12.11    4.59
  -1  -1   6   17.56    3.69
   1  -1  -6   16.04    4.86
   1   1  -6    7.31    4.28
  -1  -1  -6   12.73    2.00
  -1  -1   6   12.61    4.60
  -1   1   6    7.28    3.81
  -1   1  -6    5.53    3.92
   1  -1   6   13.49    3.88
  -1  -1   6    7.72    4.88
   1  -1   6   15.69    4.31
   1  -2   6  125.01    7.98
  -1  -2   6  133.50    7.18
   1  -2  -6  115.30    8.86
   1   2  -6  131.93    7.94
  -1  -2   6  133.20    9.61
  -1   2  -6  118.11    8.28
   1  -2  -6  122.43    6.89
  -1   2   6  115.07    8.17
   1  -2   6  110.00    8.30
  -1  -2  -6  115.53    6.55
  -1  -2  -6  134.94    9.12
  -1  -2  -6  141.86    9.33
   1  -2  -6  133.85    9.23
   1   2   6  126.78    8.82
   1   2  -6  140.67    9.28
  -1   2  -6  111.53    8.68
   1   2  -6  123.48    8.82
  -1   2  -6  127.35    7.86
  -1  -3  -6   91.65    5.30
  -1   3  -6   78.30    7.87
   1   3  -6  102.58    8.15
   1  -3  -6   84.51    7.86
  -1  -3   6   86.98    8.65
  -1   3   6   85.95    7.92
   1  -3  -6  101.41    8.56
  -1  -3   6  103.07    6.93
  -1  -3  -6   83.83    8.11
   1  -3   6   91.19    8.07
   1   3  -6   87.19    8.28
  -1   3  -6  105.18    7.88
   1  -3  -6   92.27    5.35
  -1  -3  -6  112.45    9.08
   1   3  -6  110.46    8.21
   1  -3   6   95.02    7.29
   1   3   6   88.09    8.44
  -1   3  -6  106.60    8.13
   1   4   6  956.49   29.64
  -1  -4   6  953.29   26.77
  -1   4  -6  965.48   30.37
  -1   4  -6  939.04   28.66
   1   4  -6 1034.88   29.24
   1  -4  -6  982.96   29.13
  -1  -4  -6  961.23   29.12
   1  -4  -6  947.82   30.36
  -1   4  -6  921.22   27.88
   1   4  -6  948.95   30.30
   1  -4   6  958.94   27.94
  -1   4   6  947.23   29.54
  -1  -4  -6  982.52   30.37
  -1  -4   6  992.56   30.88
   1   4  -6  924.74   28.26
   1  -4   6  995.10   29.85
   1   5   6   35.55    7.09
  -1   5  -6   41.48    8.43
   1  -5   6   48.60    7.08
  -1  -5  -6   37.86    7.08
   1  -5  -6   46.81    8.37
  -1  -5  -6   35.48    7.66
   1  -5   6   39.77    7.74
  -1   5  -6   37.97    6.44
  -1  -5   6   40.15    8.15
   1   5  -6   36.69    6.62
  -1   5  -6   30.31    7.19
  -1   5   6   36.18    7.72
  -1  -5   6   37.71    5.87
   1   5  -6   27.55    8.33
   1   5  -6   27.07    6.73
   1  -5  -6   36.75    6.83
   1   6   6   62.87    9.60
   1   6  -6   49.63    9.50
  -1  -6  -6   43.69    8.06
  -1   6  -6   69.43   10.00
   1  -6   6   44.64    8.99
   1  -6  -6   44.27    8.89
  -1   6  -6   51.05    9.51
   1   6  -6   44.13    8.79
   1  -6   6   45.02    8.10
   1  -6  -6   49.31    7.99
  -1  -6  -6   50.41    9.75
  -1   6   6   46.23    9.06
   1   6  -6   45.64    7.59
  -1  -7   6   30.89   10.21
   1   7   6   36.81   10.21
   1  -7   6   22.34    9.52
  -1  -7  -6   24.83    8.12
   1   7  -6   21.49    8.76
  -1  -7  -6   14.13    8.48
   1  -7  -6   24.22    9.76
  -1   7  -6   28.73    9.10
   1   7  -6   29.49    9.30
  -1   7   6   22.49    9.23
  -1   7  -6   17.85    8.87
   1   8  -6  341.45   21.86
  -1   8   6  375.92   22.13
   1  -8   6  374.59   22.35
   1  -8  -6  386.41   22.96
  -1  -8   6  430.67   23.67
   1   8   6  393.01   22.42
  -1   8  -6  384.56   23.18
  -1  -8  -6  408.69   24.12
   1   8  -6  374.52   22.75
  -1   8  -6  360.38   22.05
   1   9   6   -0.49   11.53
  -1   9   6   -2.31   11.40
  -1  -9   6    4.34   12.07
  -1   9  -6   -3.63   11.46
  -1  -9  -6   -6.60   11.37
   1  -9  -6   -1.40   11.70
   1   9  -6    1.57   11.97
   1   0   7  800.64   24.79
   1   0  -7  819.60   25.40
   1   0  -7  771.85   24.26
   1   0   7  737.22   23.83
  -1   0  -7  793.11   25.24
  -1   0  -7  779.87   24.23
   1   0  -7  788.67   21.17
  -1   0   7  783.18   25.23
  -1   0   7  807.14   23.66
  -1   0  -7  790.68   21.15
  -1   1   7  361.92   15.26
  -1   1  -7  362.65   15.23
   1   1  -7  376.63   15.12
  -1  -1   7  372.86   13.68
   1   1  -7  369.46   12.92
  -1   1  -7  368.82   15.50
  -1   1   7  378.89   14.62
   1   1  -7  366.64   15.75
  -1   1  -7  380.53   12.95
   1  -1  -7  353.09   13.82
  -1  -1   7  370.32   15.52
   1  -1   7  380.26   15.10
   1   1   7  387.28   14.76
  -1  -1  -7  368.93   13.95
   1  -1  -7  370.40   15.78
  -1  -1  -7  363.70   15.50
  -1  -1  -7  346.35   15.32
   1  -1   7  385.49   14.47
  -1  -2   7  465.68   16.03
   1   2  -7  469.94   18.37
   1   2  -7  458.30   17.97
  -1   2  -7  496.04   18.11
   1   2  -7  466.83   16.44
   1  -2  -7  494.09   18.86
  -1  -2  -7  497.63   18.66
   1  -2  -7  477.93   18.53
  -1  -2  -7  462.12   15.72
  -1   2  -7  509.08   16.84
  -1   2  -7  474.33   18.41
   1   2   7  516.09   18.25
   1  -2  -7  512.61   16.02
  -1  -2  -7  482.22   18.65
   1  -2   7  498.01   18.28
  -1   2   7  465.64   17.66
   1  -2   7  488.40   16.97
  -1  -2   7  492.83   19.03
   1   3  -7  492.56   18.17
  -1  -3   7  504.03   16.59
   1  -3   7  503.89   19.36
  -1   3   7  499.20   18.80
   1   3  -7  496.79   18.98
  -1   3  -7  517.87   22.04
   1   3   7  492.31   19.17
   1  -3   7  481.70   17.48
   1  -3  -7  544.92   19.64
  -1   3  -7  492.55   18.55
  -1  -3  -7  495.07   19.35
  -1   3  -7  463.30   17.80
  -1  -3  -7  474.47   19.49
   1   3  -7  536.14   21.54
   1  -3  -7  519.39   19.89
  -1  -3   7  505.39   20.09
  -1   4  -7  832.29   26.73
  -1   4  -7  838.05   26.36
   1   4  -7  823.19   26.64
   1  -4  -7  874.91   36.21
   1   4   7  826.78   27.63
  -1  -4   7  811.94   28.46
  -1   4   7  859.69   27.75
  -1  -4   7  810.43   24.50
   1  -4   7  820.35   25.51
   1   4  -7  851.00   28.56
   1   4  -7  791.84   26.45
   1  -4  -7  862.63   28.78
   1  -4   7  883.65   27.85
  -1  -4  -7  810.90   27.29
  -1  -4  -7  853.02   28.33
  -1   4  -7  803.18   28.31
   1   5   7    4.32    6.93
  -1  -5   7   11.07    8.49
  -1   5  -7    8.06    7.07
  -1   5  -7    6.65    6.31
  -1  -5  -7    8.62    7.46
   1   5  -7    9.72    7.58
   1  -5   7    3.55    7.05
   1  -5   7    9.89    6.37
   1   5  -7    2.80    6.92
  -1   5  -7   11.12    7.24
  -1  -5  -7    8.26    7.08
   1   5  -7    6.77    6.59
  -1   5   7    2.78    6.87
   1  -5  -7    1.82    7.42
   1  -5  -7    4.62    6.63
   1   6  -7  183.43   15.78
  -1  -6   7  204.37   15.51
  -1   6  -7  128.37   12.90
   1  -6  -7  162.06   12.85
   1   6  -7  136.75   12.70
   1   6   7  147.94   13.69
  -1  -6  -7  160.96   14.22
  -1  -6  -7  162.63   13.11
   1  -6  -7  137.12   13.32
  -1   6  -7  138.85   13.09
  -1   6   7  178.37   14.56
   1   6  -7  154.52   13.88
  -1  -7   7  465.35   23.82
   1   7  -7  480.38   23.83
   1   7   7  470.03   24.33
  -1   7  -7  464.90   23.30
  -1   7   7  521.93   24.87
   1  -7  -7  479.13   21.97
  -1  -7  -7  416.58   23.13
   1  -7   7  453.35   23.04
  -1   7  -7  462.59   23.70
   1  -7  -7  473.59   23.90
  -1  -7  -7  471.85   21.62
   1   7  -7  497.61   24.75
   1   8  -7  179.52   18.70
   1   8   7  156.12   26.28
  -1   8  -7  133.65   15.59
  -1   8  -7  161.21   16.76
   1   8  -7  122.77   14.67
  -1  -8   7  162.82   17.20
  -1   8   7  139.81   28.73
   1   0   8  452.02   17.62
  -1   0  -8  442.30   17.72
  -1   0   8  443.71   17.14
  -1   0   8  466.59   19.00
   1   0  -8  447.13   17.71
   1   0  -8  476.15   19.23
   1   0   8  491.54   18.72
  -1   0  -8  446.85   18.81
  -1  -1   8    7.85    6.44
   1  -1  -8    1.17    5.06
  -1   1   8    6.67    5.81
   1   1   8    5.07    5.52
  -1   1  -8    4.84    4.71
   1   1  -8    6.46    4.81
   1  -1   8    4.08    5.54
  -1  -1  -8    6.59    5.44
   1   1  -8    0.56    6.19
  -1   1  -8    5.89    6.22
  -1  -1   8    1.41    4.92
  -1  -1  -8    5.87    6.23
   1  -1   8    3.92    5.29
   1   1  -8    2.27    5.85
  -1  -1  -8    2.64    5.99
   1  -1  -8    6.73    6.30
  -1   1  -8    4.63    5.74
  -1   1   8   13.77    5.79
  -1  -2  -8  169.54   12.88
  -1   2  -8  227.28   13.47
   1   2  -8  211.60   13.46
   1  -2  -8  209.88   13.72
  -1  -2  -8  210.89   11.08
  -1   2  -8  205.40   13.17
  -1   2   8  204.98   12.77
   1  -2  -8  221.64   11.23
   1  -2  -8  224.28   13.73
   1   2  -8  192.83   11.38
  -1  -2   8  200.59   11.17
  -1  -2   8  184.90   13.64
  -1   2  -8  194.95   11.40
   1   2  -8  188.41   13.54
   1  -2   8  199.47   13.05
   1  -2   8  196.76   11.75
   1  -3   8   57.22    7.77
   1  -3  -8   44.36    8.35
  -1  -3   8   53.63    7.39
  -1  -3   8   68.20    9.52
  -1   3  -8   38.10    8.01
   1  -3  -8   39.38    8.45
   1   3  -8   39.86    8.34
  -1  -3  -8   57.00    8.99
  -1   3  -8   41.07    7.51
   1   3  -8   52.34    7.59
  -1  -3  -8   45.83    8.68
   1  -3   8   62.07    8.90
   1   3  -8   57.14    8.83
   1   3   8   46.85    8.48
  -1   3   8   53.94    8.31
  -1   3  -8   41.36    8.24
  -1   4   8  162.52   12.75
   1  -4   8  214.52   15.15
  -1  -4   8  192.19   14.49
   1   4  -8  174.17   12.95
   1  -4   8  206.29   12.91
  -1   4  -8  199.58   14.71
   1   4   8  221.22   15.22
   1   4  -8  157.89   13.09
   1  -4  -8  235.98   15.89
  -1  -4  -8  215.61   14.81
   1  -4  -8  204.92   15.39
  -1   4  -8  171.89   12.65
   1   4  -8  187.32   13.93
  -1   4  -8  216.90   14.18
  -1  -4  -8  200.44   14.60
  -1  -5  -8   40.62    9.98
   1   5  -8   36.01    9.77
  -1  -5   8   54.43   10.70
  -1  -5  -8   25.03    8.95
   1  -5  -8   42.45    9.57
  -1   5  -8   43.92    9.64
  -1   5  -8   27.36    8.86
   1  -5  -8   32.21    9.88
   1   5  -8   30.83    9.00
   1   5  -8   53.46    9.50
   1  -5   8   24.41   10.04
  -1   5  -8   27.39    9.11
  -1   5   8   26.28    9.01
   1   5   8   39.41    9.59
  -1  -6  -8   35.63    9.95
   1  -6  -8   51.42   10.91
   1  -6  -8   39.81   11.15
  -1  -6   8   33.51   11.20
  -1  -6  -8   49.16   11.27
  -1   6  -8   26.72   10.18
  -1   6   8   42.04   10.90
  -1   6  -8   68.29   11.68
   1   6   8   47.98   10.78
   1  -6   8   44.76   14.81
   1   6  -8   46.50   11.32
   1   6  -8   51.56   10.48
   1  -7  -8   38.51   12.95
  -1   7  -8   53.47   12.82
  -1   7  -8   63.21   13.07
   1   7  -8   41.41   11.90
   1   7  -8   45.35   12.25
  -1  -7   8   45.61   13.35
  -1  -7  -8   40.35   10.93
  -1   7   8   59.68   12.73
  -1  -7  -8   45.34   11.77
   1   7   8   46.05   12.52
   1  -7  -8   59.28   11.97
  -1   0   9  105.68    9.92
   1   0  -9  110.32   10.73
  -1   0  -9  107.54   10.48
   1   0   9  105.67   15.46
  -1   0  -9   93.36   11.14
   1   0   9  102.45   10.82
  -1   0   9   97.47   10.80
   1   0  -9  102.71   11.51
  -1  -1  -9  188.16   14.13
  -1  -1  -9  173.58   13.42
   1  -1  -9  199.92   15.00
  -1  -1   9  185.53   13.90
   1  -1  -9  203.47   14.81
  -1  -1  -9  168.84   12.25
   1   1   9  176.25   13.37
  -1   1  -9  174.57   13.08
   1  -1  -9  163.49   12.74
   1   1  -9  190.55   14.15
  -1   1  -9  168.62   13.02
   1  -1   9  170.77   12.41
  -1  -1   9  173.34   12.23
   1   1  -9  188.85   14.23
  -1  -2  -9   63.16   10.28
   1  -2   9   87.51    9.48
  -1   2  -9   84.59   10.66
  -1   2   9   73.28    9.37
   1   2  -9   79.75   10.41
   1   2   9   85.97   10.50
   1  -2  -9   85.86   11.17
  -1  -2   9  111.50   11.66
  -1  -2  -9  100.08   11.47
   1  -2  -9   77.15   10.79
   1   2  -9   78.14   10.63
  -1   2  -9   76.12   10.16
   1  -3   9  128.52   12.68
  -1  -3   9  177.03   14.16
  -1   3  -9  162.16   13.88
  -1   3   9  136.09   12.27
   1   3  -9  105.56   11.87
   1  -3  -9  145.02   13.63
  -1  -3  -9  152.35   13.93
   1   3   9  143.05   13.23
   1   3  -9  133.83   12.99
   1   3  -9  141.37   11.60
   1  -3  -9  134.29   13.52
  -1  -3  -9  178.38   14.69
  -1   3  -9  145.87   11.41
  -1   3  -9  140.14   12.47
  -1  -4   9  136.02   13.73
   1  -4  -9  155.15   15.15
  -1   4  -9  147.94   13.19
   1   4   9  150.03   13.49
   1   4  -9  125.29   12.83
   1   4  -9  136.14   12.56
   1   4  -9  143.84   14.14
  -1   4  -9  145.52   14.44
  -1  -4  -9  147.94   13.47
  -1   4   9  161.60   14.03
   1  -4   9  150.45   13.53
  -1   4  -9  142.19   12.64
   1  -4  -9  156.21   14.53
  -1  -4  -9  129.07   13.65
  -1  -5  -9   33.22   10.71
  -1  -5   9   46.98   11.77
   1   5  -9   40.90   10.40
  -1   5   9   37.61   10.95
   1  -5  -9   37.12   11.51
  -1   5  -9   51.56   11.03
   1   5  -9   35.52   10.27
   1   5   9   31.97   10.52
  -1   5  -9   45.69   10.60
  -1   5  -9   51.88   11.79
  -1  -5  -9   39.96   11.13
   1   5  -9   39.81   11.45
   1  -5  -9   44.32   11.18
   1  -6  -9   53.60   14.43
   1   6   9   23.44   11.97
  -1   6   9   32.94   12.12
   1  -6  -9   36.29   11.43
  -1  -6   9   22.21   11.88
  -1  -6  -9   30.65   11.72
   1   6  -9   11.97   11.15
  -1   6  -9   30.02   11.41
  -1  -6  -9   19.00   11.70
  -1   6  -9   30.41   19.20
  -1   0 -10 1714.47   50.59
   1   0 -10 1768.37   52.19
  -1   0  10 1750.67   52.00
   1   0 -10 1785.03   50.95
   1   0  10 1733.67   49.94
  -1   0 -10 1802.29   52.40
  -1   0  10 1662.26   49.09
  -1   0 -10 1789.14   52.20
  -1  -1 -10    2.97    9.06
   1  -1  10    9.15    8.00
   1   1  10    2.66    7.93
  -1  -1  10    5.08    8.38
   1  -1  10   -2.29    8.13
  -1   1 -10    6.33    8.65
   1   1 -10    2.99    9.00
  -1   1 -10   -0.77    8.40
   1  -1 -10    2.29    9.42
  -1  -1 -10   -2.78    9.18
  -1   1  10    3.25    8.41
   1   1 -10    7.64    8.73
   1  -1 -10    7.47    8.99
   1   2 -10   13.39    9.72
   1   2 -10    9.65    9.22
   1   2  10   11.22    8.97
  -1  -2  10    5.73    8.80
  -1   2  10   10.16    8.32
  -1  -2 -10   10.22    9.32
   1  -2 -10   11.40    9.78
  -1   2 -10   17.06    9.72
   1  -2  10   20.84    9.48
  -1  -2 -10    8.77    9.88
  -1   2 -10   15.57    9.20
   1  -2 -10   25.79   10.19
  -1   3 -10   50.60   11.11
  -1  -3 -10   52.33   11.73
   1  -3 -10   60.32   12.11
  -1   3 -10   56.92   11.44
   1  -3  10   50.85   10.91
   1  -3 -10   41.72   11.82
  -1  -3  10   48.34   11.30
   1   3  10   50.63   10.61
  -1  -3 -10   54.55   11.91
   1   3 -10   53.37   11.20
  -1   3  10   50.95   10.71
   1   3 -10   61.81   11.71
  -1  -4  10  943.00   35.43
  -1  -4 -10  976.55   36.50
   1   4  10  951.36   34.98
   1   4 -10  909.73   34.78
   1   4 -10 1006.10   36.04
  -1   4  10 1006.47   35.38
  -1  -4 -10 1020.04   36.18
   1  -4 -10  943.85   36.85
  -1   4 -10  979.76   36.24
  -1   4 -10  932.38   34.57
   1  -4 -10 1035.82   36.42
   1   5 -10   -0.40   10.88
  -1  -5 -10    0.38   11.45
   1   5 -10    1.67   11.38
  -1  -5 -10    5.34   13.75
  -1   5 -10    8.31   11.93
  -1   5 -10   -5.04   12.35
  -1   5  10   12.48   11.47
  -1   5 -10    7.62   10.91
   1  -5 -10    8.18   11.62
   1  -5 -10   -5.20   15.05
   1   5 -10   -1.13   10.33
   1   0  11   37.85   11.42
   1   0 -11   41.06   12.00
  -1   0 -11   48.12   12.68
  -1   0 -11   40.77   12.61
  -1   1 -11  125.25   14.80
   1  -1 -11  179.42   17.66
  -1  -1 -11  157.76   16.85
  -1   1  11  183.58   15.40
   1   1 -11  124.15   15.01
   1   1  11  163.39   15.57
  -1  -1  11  137.11   15.17
  -1   1 -11  156.63   16.25
   1   1 -11  110.70   14.02
   1  -1  11  135.18   14.86
   1  -1 -11  141.08   17.63
  -1  -1 -11  145.49   15.87
   1   2  11   11.94   10.58
  -1   2  11   11.87   10.11
   1  -2 -11   11.40   11.72
  -1   2 -11   13.09   11.14
   1   2 -11   21.25   11.77
  -1  -2  11   22.92   11.63
  -1  -2 -11   13.90   21.44
   1   2 -11   32.78   11.98
   1  -2 -11   32.91   16.80
  -1   2 -11   27.16   12.23
  -1  -2 -11   17.28   12.48
  -1   3 -11  222.51   19.30
   1  -3 -11  194.91   18.83
  -1   3  11  202.38   17.42
   1   3 -11  203.54   18.23
   1   3  11  199.69   17.35
  -1  -3 -11  207.89   19.11
   1  -3 -11  190.60   19.38
   1   3 -11  206.50   17.80
  -1  -3 -11  194.71   18.70
  -1   3 -11  217.34   17.93
  -1  -3  11  202.30   17.16
   2   1   0  156.62    5.06
   2   1   0  169.67    5.32
   2  -1   0  161.93    5.06
  -2  -1   0  163.27    5.61
  -2  -1   0  160.84    5.24
   2   1   0  154.97    4.96
   2   1   0  161.99    5.61
  -2   1   0  163.54    5.05
   2  -1   0  169.15    5.49
  -2   1   0  153.25    5.01
   2   1   0  166.18    4.86
  -2   1   0  165.67    4.58
   2   1   0  157.01    5.12
   2  -1   0  155.58    4.56
   2  -1   0  149.02    4.89
   2  -1   0  154.29    5.01
  -2  -1   0  164.46    5.07
   2  -2   0  300.14    8.86
  -2   2   0  298.14    8.84
  -2  -2   0  301.02    9.57
  -2  -2   0  305.42    8.73
  -2   2   0  300.99    8.73
   2  -2   0  277.16    8.45
  -2   2   0  298.53    9.15
   2   2   0  306.39    8.58
   2   2   0  299.72    8.73
   2  -2   0  308.20    9.24
  -2   2   0  292.34    8.48
   2   2   0  288.49    9.50
  -2  -2   0  298.09    8.62
   2  -2   0  301.40    8.75
  -2  -2   0  307.51    8.69
   2   2   0  291.45    8.51
   2   3   0 1995.65   50.01
  -2  -3   0 2007.81   50.06
   2   3   0 1886.72   51.03
  -2   3   0 2084.92   49.35
   2  -3   0 1983.41   50.16
   2   3   0 1950.61   49.17
   2  -3   0 1971.59   49.94
   2   3   0 2085.23   49.34
   2  -3   0 2025.63   50.65
  -2  -3   0 1941.91   49.09
  -2  -3   0 2029.36   49.50
   2   3   0 2029.32   49.56
  -2   3   0 1967.47   50.20
  -2  -3   0 2109.66   51.41
  -2   3   0 2060.02   50.03
   2  -3   0 2011.41   49.26
  -2  -3   0 2064.53   49.35
  -2  -4   0 1837.33   47.52
   2  -4   0 1862.50   48.09
  -2   4   0 1897.07   47.40
  -2   4   0 1962.32   47.80
   2   4   0 1805.42   46.68
  -2  -4   0 1878.65   48.67
   2   4   0 1929.50   47.42
  -2  -4   0 1919.19   46.91
   2   4   0 1872.78   47.85
   2   4   0 1906.78   47.81
  -2   4   0 1951.04   48.53
  -2  -4   0 1892.82   49.54
   2  -4   0 1927.42   48.92
  -2  -5   0   60.26    4.65
   2  -5   0   66.93    6.24
   2   5   0   81.89    6.48
  -2  -5   0   56.90    6.37
   2   5   0   83.96    6.54
   2   5   0   72.89    5.42
  -2  -5   0   74.08    5.75
  -2   5   0   85.37    6.43
  -2   5   0   58.88    5.87
  -2   5   0   68.74    5.34
   2   5   0   69.94    5.16
   2  -5   0   64.09    5.30
   2   6   0   82.48    6.33
   2  -6   0  105.10    9.09
  -2   6   0   86.92    6.36
  -2  -6   0   92.43    9.12
  -2   6   0   79.58    7.23
   2   6   0  103.16    8.02
  -2  -6   0   88.39    6.00
  -2   6   0   84.93    8.01
   2   6   0   95.50    7.65
   2   7   0  842.07   25.77
  -2   7   0  888.32   25.72
  -2   7   0  907.59   28.45
  -2  -7   0  879.94   29.40
  -2   7   0  856.57   27.10
   2   7   0  876.25   27.49
   2   7   0  845.02   27.01
   2  -7   0  904.48   28.71
   2   8   0  419.83   22.54
   2   8   0  430.15   18.59
  -2  -8   0  413.19   21.03
   2   8   0  409.44   18.39
  -2   8   0  393.54   18.64
  -2   8   0  470.72   20.25
   2  -8   0  385.13   19.36
   2   9   0  218.18   16.34
  -2  -9   0  210.24   17.26
   2   9   0  195.75   14.76
  -2   9   0  210.23   16.57
  -2   9   0  191.09   14.72
   2  -9   0  206.19   16.16
   2  10   0   19.69   11.67
  -2  10   0   15.63   12.26
   2 -10   0   22.76   12.09
  -2 -10   0   40.75   13.41
  -2  10   0   19.85   10.94
   2  10   0   21.57   11.21
  -2   0  -1  714.56   17.62
   2   0   1  711.76   18.17
   2   0  -1  730.92   17.45
   2   0   1  695.17   17.48
  -2   0  -1  747.82   18.42
  -2   0  -1  729.17   18.00
  -2   0  -1  716.16   18.13
   2   0  -1  718.30   18.40
   2   0   1  696.43   17.94
  -2   0  -1  726.37   17.49
   2   0  -1  709.35   18.05
   2   0  -1  695.33   18.22
   2   0   1  719.66   17.62
   2   0  -1  716.43   17.47
   2   1  -1  564.97   14.07
   2   1  -1  538.18   14.23
   2  -1  -1  542.10   13.90
  -2   1   1  516.70   13.40
  -2  -1   1  555.01   14.05
   2   1  -1  553.13   15.03
   2  -1   1  554.57   14.09
  -2  -1  -1  524.56   13.54
   2  -1  -1  524.64   14.40
   2   1   1  534.47   13.84
   2  -1   1  578.70   14.57
   2  -1  -1  522.96   13.73
   2  -1  -1  530.85   13.44
   2  -1   1  508.91   14.71
  -2   1  -1  564.66   14.10
  -2   1   1  544.34   14.43
  -2  -1  -1  537.23   13.85
  -2  -1   1  506.82   14.83
   2   1   1  546.06   14.23
   2   1   1  552.72   14.28
  -2   1  -1  544.11   13.71
  -2  -1  -1  585.66   14.50
   2  -1   1  539.56   13.78
   2  -1  -1  550.15   14.24
  -2  -1  -1  554.77   14.29
   2  -1  -1  562.56   14.01
  -2  -1  -1  563.59   14.28
  -2  -1   1  561.95   14.22
  -2  -1   1  567.43   14.54
   2   1   1  527.30   13.53
  -2   1  -1  543.82   14.48
   2  -1   1  538.22   13.61
   2   1   1  541.42   14.39
  -2   1  -1  543.81   14.85
  -2   1   1  559.03   14.25
  -2  -2  -1  360.61   10.25
  -2   2   1  367.14   10.74
   2   2   1  362.26    9.85
   2  -2  -1  366.07   10.81
  -2   2   1  379.30    9.66
   2   2  -1  368.26   10.60
   2  -2   1  355.85   10.56
   2   2  -1  384.86   10.61
   2   2   1  351.99   10.26
  -2  -2   1  353.82   10.56
   2   2   1  359.78   10.47
  -2   2  -1  356.06   10.89
   2   2   1  357.36   10.98
  -2   2   1  360.51    9.75
  -2   2  -1  332.10   10.14
   2  -2  -1  356.56    9.45
  -2  -2  -1  363.75    9.82
  -2   2   1  355.71    9.67
   2   2   1  361.67    9.54
  -2   2   1  344.86   10.66
   2  -2   1  343.91   10.55
  -2  -2   1  362.51   10.52
   2   2   1  367.95    9.65
  -2  -2   1  375.53   11.44
  -2   2  -1  367.31   10.55
  -2  -2   1  357.11   10.11
   2   2  -1  359.29   11.49
   2   2  -1  358.94    9.63
   2  -2   1  365.38   10.94
   2  -2  -1  357.45    9.83
   2  -2  -1  348.15   10.65
  -2   2  -1  378.47   10.68
  -2  -2   1  358.93    9.56
   2  -2   1  356.55   10.33
   2  -2   1  350.33    9.07
   2  -2  -1  354.77    9.61
  -2  -2  -1  349.80   10.89
  -2  -2  -1  358.76   10.51
  -2   3  -1  716.37   19.02
  -2  -3  -1  681.33   18.05
  -2  -3  -1  676.66   18.22
  -2  -3   1  714.42   20.14
  -2   3   1  659.50   19.13
  -2   3   1  668.87   17.36
  -2   3  -1  694.82   19.25
  -2  -3  -1  695.75   18.97
  -2  -3  -1  722.49   20.91
   2  -3  -1  679.53   17.58
  -2  -3   1  666.58   18.84
   2  -3  -1  673.70   17.30
   2   3  -1  646.02   19.97
  -2   3   1  717.51   18.17
  -2   3  -1  702.96   18.95
  -2   3   1  666.79   17.50
   2   3  -1  653.27   18.28
   2   3   1  691.01   18.90
   2  -3   1  663.95   19.21
   2  -3  -1  690.62   19.33
   2  -3   1  662.27   18.88
   2   3  -1  672.22   18.76
  -2  -3   1  690.99   18.01
  -2   3   1  646.06   19.17
   2  -3   1  690.94   19.05
   2   3   1  670.55   17.66
   2   3   1  729.66   18.24
  -2   3  -1  668.17   18.87
   2   3   1  640.01   19.56
  -2  -3   1  698.05   18.03
   2   3  -1  709.70   18.95
   2   3  -1  691.77   18.11
   2  -3  -1  694.83   18.15
   2   3   1  681.76   17.52
   2  -3  -1  719.33   19.48
   2  -4  -1 1528.74   40.51
   2  -4   1 1725.15   43.81
  -2  -4  -1 1623.40   43.15
   2  -4   1 1583.21   41.82
   2   4   1 1614.34   41.49
  -2   4   1 1612.84   39.55
  -2   4   1 1602.96   40.40
  -2   4  -1 1606.91   42.01
  -2   4  -1 1567.20   42.20
   2   4  -1 1732.49   41.70
   2   4  -1 1637.46   40.63
  -2  -4   1 1526.76   41.76
   2   4   1 1631.49   41.72
   2  -4  -1 1660.84   42.75
  -2   4  -1 1612.76   41.51
   2  -4  -1 1626.67   39.53
   2   4   1 1593.45   40.54
   2   4   1 1585.68   41.62
  -2  -4   1 1631.36   43.37
   2   4  -1 1680.21   41.16
   2  -4  -1 1595.89   40.42
  -2  -4  -1 1640.87   40.68
  -2   4   1 1673.90   42.25
  -2   4   1 1646.88   40.85
  -2  -4  -1 1593.60   40.61
  -2  -4   1 1659.64   40.34
  -2   5  -1  183.36    9.34
  -2  -5  -1  180.35    9.89
   2   5   1  197.45    8.77
   2   5   1  187.02    9.19
  -2   5   1  156.45    6.84
   2  -5  -1  164.55    7.20
  -2  -5  -1  187.18    7.70
   2   5  -1  175.98    9.13
  -2  -5   1  191.38   10.44
  -2   5   1  176.04    9.33
  -2   5  -1  179.35    8.57
   2   5  -1  178.59    8.15
  -2   5   1  162.59    6.50
  -2   5   1  181.68    8.53
   2   5   1  178.87    8.37
   2   5   1  193.00    7.30
   2  -5   1  179.93    9.41
   2  -5  -1  188.19    9.75
   2  -5  -1  173.44    6.14
   2   5  -1  181.42    8.52
   2   5  -1  191.30    8.67
  -2   5  -1  191.01    9.44
  -2  -5  -1  169.23    7.53
  -2  -5   1  178.07    6.95
   2   6   1  140.72    9.42
  -2   6  -1  147.72   10.18
   2  -6  -1  156.72    6.14
   2   6  -1  146.30    9.87
  -2   6  -1  161.40   10.15
   2   6  -1  160.07    9.26
  -2   6   1  147.39    9.35
   2   6  -1  162.19    9.42
  -2   6  -1  158.60    9.15
   2  -6  -1  151.25   10.02
  -2  -6   1  150.05   11.10
  -2  -6  -1  155.58    8.64
  -2  -6   1  165.66    7.03
   2   6   1  146.12    7.68
  -2   6   1  167.96    7.61
   2  -6   1  165.03   10.48
   2   6   1  161.94    9.28
  -2  -6  -1  164.10   11.07
  -2   6   1  148.66   10.12
   2  -7  -1  206.74   12.84
   2   7  -1  197.82   12.30
   2   7  -1  216.60   11.83
   2   7   1  194.49   11.67
  -2   7   1  200.26   11.97
  -2   7  -1  190.46   12.42
  -2   7   1  207.58   12.67
  -2  -7  -1  214.85    9.69
   2   7  -1  189.44   12.29
  -2  -7   1  213.51   13.99
   2  -7   1  194.26   13.26
   2   7   1  188.96    9.71
  -2   7  -1  199.53   13.53
   2   7   1  192.53   12.40
  -2   7  -1  219.10   11.37
  -2   7   1  210.79   10.47
   2   8   1  280.36   17.06
   2   8   1  322.30   16.72
   2  -8   1  263.93   16.68
   2  -8  -1  293.15   17.10
  -2   8  -1  288.84   17.40
  -2   8  -1  311.53   16.42
  -2  -8  -1  284.37   17.50
  -2  -8   1  294.91   18.09
   2   8  -1  329.83   16.34
   2   8  -1  311.12   15.07
  -2   8   1  303.28   15.80
   2   8  -1  267.19   16.07
  -2   8  -1  303.70   14.96
  -2   8   1  271.11   16.28
  -2  -9   1   31.20   11.22
  -2   9  -1   38.23    9.99
  -2   9   1   33.98   10.05
   2   9  -1   40.77   10.82
   2  -9  -1   53.27   11.14
  -2   9   1   42.52    9.99
   2   9   1   22.65    8.82
   2   9  -1   55.86   10.37
   2   9   1   36.27    9.79
   2  -9   1   40.31   11.03
  -2  -9  -1   32.97   11.08
  -2   9  -1   55.05   11.70
   2 -10  -1   32.60   12.50
  -2  10  -1   45.62   12.25
   2  10   1   25.40   11.10
  -2  10   1   51.37   13.03
  -2  10   1   22.61   10.62
   2  10   1   40.00   11.61
   2 -10   1   23.94   12.37
  -2 -10  -1   28.51   13.28
   2  10  -1   35.88   11.81
  -2  10  -1   41.97   13.45
  -2 -10   1   25.78   12.60
   2   0  -2  175.29    5.24
   2   0   2  178.47    5.23
   2   0  -2  190.81    6.23
   2   0  -2  170.00    6.29
   2   0   2  181.74    5.90
  -2   0   2  170.70    5.74
  -2   0  -2  173.11    5.83
  -2   0  -2  172.30    5.20
   2   0  -2  177.10    5.75
  -2   0  -2  187.04    5.80
   2   0   2  168.16    5.41
  -2   0   2  173.88    5.24
  -2   0  -2  172.48    5.46
  -2   0   2  168.96    6.24
  -2   0   2  173.19    5.11
   2   0  -2  174.17    5.13
   2   0   2  177.90    6.12
   2   0  -2  183.05    6.10
   2   0   2  164.69    5.87
  -2   0  -2  172.22    6.09
  -2  -1  -2    6.98    2.01
   2   1  -2   11.95    2.27
   2   1   2   12.71    2.22
  -2  -1  -2   12.37    1.47
  -2   1  -2   12.76    1.75
   2  -1   2   13.28    1.70
   2   1  -2   16.02    2.88
  -2   1   2    8.97    1.94
  -2   1  -2   11.37    1.83
   2  -1  -2    8.74    1.76
  -2  -1  -2    7.55    1.70
  -2  -1   2    6.68    2.10
  -2  -1  -2   11.71    1.13
   2   1   2    9.39    2.02
   2   1   2   10.90    1.47
  -2   1   2    9.69    1.78
  -2   1  -2   10.73    1.81
   2  -1  -2   12.18    1.40
   2  -1   2   12.99    1.85
  -2  -1  -2    9.65    1.78
   2  -1  -2   11.47    1.09
   2  -1   2   12.43    2.35
  -2   1  -2   14.62    2.17
   2  -1  -2   10.90    2.28
  -2  -1   2   15.82    2.08
  -2  -1   2   15.48    2.04
   2   1   2   12.40    1.18
   2  -1   2   11.21    1.89
   2  -1  -2   10.65    2.04
   2   1   2    8.13    1.80
  -2   1  -2   13.64    2.47
  -2  -1   2   15.96    2.27
   2   1  -2   13.47    1.30
   2   1  -2   16.81    2.05
   2  -1   2   11.04    2.10
   2  -2   2  193.85    7.72
   2  -2   2  187.06    7.61
   2   2  -2  194.62    9.18
   2  -2   2  201.08    6.31
   2  -2  -2  201.57    6.73
  -2  -2   2  202.79    7.28
  -2  -2   2  204.92    6.68
   2  -2  -2  186.11    5.43
   2  -2   2  206.76    6.99
   2  -2   2  201.60    7.58
   2   2   2  198.36    7.46
  -2   2   2  199.08    6.93
   2  -2  -2  203.02    7.67
  -2   2  -2  208.07    7.28
  -2   2   2  204.94    5.69
  -2  -2  -2  185.21    5.84
   2   2  -2  197.92    7.10
  -2  -2   2  204.70    5.93
   2  -2  -2  191.60    5.47
  -2  -2  -2  202.51    7.43
   2   2   2  197.67    5.86
  -2   2  -2  207.07    7.49
   2   2   2  186.68    5.66
   2  -2  -2  207.96    7.52
  -2   2  -2  197.97    7.11
   2   2  -2  197.77    7.39
   2   2   2  206.55    7.24
  -2   2  -2  201.09    6.19
  -2  -2  -2  198.83    5.63
   2   2   2  213.84    7.45
  -2  -2   2  201.90    8.03
   2   2  -2  193.65    7.04
  -2  -2   2  206.97    7.51
  -2  -2  -2  204.27    7.10
  -2  -2  -2  198.99    7.39
  -2  -2   2  199.93    6.17
   2  -2   2  183.65    7.20
   2  -2  -2  202.36    5.81
   2  -2  -2  190.59    7.36
  -2   2   2  209.44    7.32
   2   3   2   21.82    3.45
   2   3  -2   19.09    5.13
  -2   3   2   23.57    3.26
   2  -3  -2   23.57    2.68
   2   3  -2   25.41    3.41
  -2  -3   2   28.94    2.79
   2  -3   2   40.51    4.38
   2   3   2   23.31    1.74
   2   3  -2   20.99    3.20
  -2  -3   2   25.38    2.68
  -2  -3  -2   22.94    2.52
  -2   3  -2   32.82    3.77
  -2  -3   2   20.23    3.66
  -2   3   2   24.84    3.01
   2   3  -2   27.35    3.56
   2  -3  -2   27.25    2.67
   2   3   2   23.84    2.50
   2  -3   2   23.22    3.87
  -2  -3  -2   24.05    4.19
  -2   3  -2   25.23    2.13
   2   3   2   26.05    3.42
   2  -3   2   27.45    4.24
   2   3  -2   24.26    2.77
  -2  -3   2   23.02    4.21
   2   3   2   24.08    1.80
  -2   3  -2   23.14    2.26
   2  -3   2   24.17    3.50
  -2   3  -2   18.13    3.07
  -2   3   2   24.27    2.36
  -2  -3  -2   22.73    2.93
  -2   4  -2   73.86    3.45
  -2   4   2   88.93    6.20
   2  -4  -2   81.64    4.62
   2  -4  -2   64.27    5.57
   2   4   2   78.37    5.60
   2   4  -2   91.82    6.66
   2   4   2   92.96    6.59
  -2  -4   2   78.75    6.70
   2  -4  -2   75.37    4.99
  -2  -4   2   80.48    4.57
  -2   4  -2   74.64    6.11
  -2   4  -2   75.47    5.81
  -2   4  -2   78.91    6.54
   2   4  -2   74.26    5.37
  -2  -4  -2   76.68    5.08
  -2   4   2   77.15    4.84
   2  -4   2   80.59    6.76
  -2  -4  -2   79.60    5.17
   2   4   2   81.42    4.92
   2   4  -2   77.00    5.70
   2  -4  -2   64.36    3.03
  -2   4  -2   72.41    4.06
   2   4   2   78.37    3.44
  -2  -4  -2   92.76    6.71
  -2   4   2   79.58    5.60
  -2   4  -2   78.20    6.17
   2   4   2   77.27    3.50
   2   4  -2   77.61    5.92
  -2  -5  -2   40.87    5.66
  -2   5   2   62.91    5.65
  -2   5  -2   49.65    5.67
   2  -5  -2   52.25    4.12
  -2   5   2   54.40    5.00
   2  -5  -2   46.25    3.04
   2   5   2   53.13    5.99
  -2   5   2   48.23    3.26
  -2   5  -2   54.12    6.23
   2  -5  -2   50.98    6.24
   2   5  -2   53.38    5.38
   2  -5   2   55.37    6.32
   2   5  -2   42.72    5.74
   2   5  -2   47.22    5.55
  -2   5  -2   45.78    6.01
  -2  -5   2   56.52    6.65
  -2  -5  -2   50.45    4.82
   2   5   2   49.24    3.69
   2   5   2   52.20    3.41
   2   5   2   51.11    9.04
  -2  -5   2   56.70    4.21
  -2  -5   2   50.10    5.66
   2   5  -2   35.98    4.96
  -2   5   2   52.22    5.97
   2   5   2   56.94    5.17
  -2   6   2   32.58    6.26
  -2  -6   2   33.24    3.90
  -2   6  -2   21.71    5.48
   2  -6  -2   25.12    6.13
  -2  -6  -2   35.09    6.78
  -2  -6   2   26.89    6.61
  -2  -6  -2   27.96    4.62
   2   6   2   32.77    6.05
   2  -6   2   29.32    6.23
   2   6  -2   34.68    5.95
  -2   6  -2   25.68    6.06
   2   6   2   30.98    3.54
  -2   6  -2   29.18    6.26
   2   6  -2   27.79    5.69
  -2   6   2   32.33    5.30
   2   6  -2   21.53    5.39
   2  -6  -2   27.12    3.69
  -2   6   2   27.37    3.15
   2   6   2   30.70    5.16
   2   7   2  116.41   10.26
  -2   7  -2   98.42    8.87
   2   7  -2  120.09   10.58
  -2  -7  -2  132.14    8.72
  -2   7   2  123.85   11.59
  -2   7  -2  105.88   10.41
  -2   7   2  126.33    9.22
   2   7  -2  133.53   10.31
   2   7   2  126.61    9.29
  -2  -7   2  102.45   10.81
   2   7  -2  119.90    9.52
  -2  -7  -2  108.70   10.84
   2  -7   2  130.07   11.14
  -2   7  -2  135.45   11.17
   2  -8  -2    8.09    7.59
  -2   8   2   11.83    6.90
  -2   8  -2   16.07    6.83
   2   8  -2    5.67    7.91
   2   8   2    5.06    7.19
   2   8  -2    8.00    7.22
   2   8   2    3.97    6.77
  -2   8   2    6.30    7.35
   2  -8   2   11.74    8.66
  -2   8  -2   10.00    7.69
  -2  -8   2    1.34    8.16
   2   8  -2    6.64    7.34
  -2  -8  -2   10.20    8.26
  -2   8  -2    5.19    9.38
   2   9   2  157.73   14.22
  -2   9  -2  121.91   12.35
   2  -9  -2  148.87   15.08
  -2   9   2  136.94   12.40
   2  -9   2  154.90   14.90
   2   9  -2  123.45   13.33
  -2  -9  -2  130.89   14.13
  -2   9  -2  142.96   14.82
   2   9   2  157.40   13.26
   2   9  -2  154.96   18.24
  -2   9  -2  145.74   14.25
  -2  -9   2  118.62   14.28
  -2   9   2  134.41   13.71
   2   9  -2  153.42   13.42
   2  10  -2   12.18   11.10
   2 -10  -2   11.50   11.89
  -2  10  -2    6.06   13.24
   2  10   2    8.82   10.70
  -2  10   2    4.93   11.15
  -2 -10   2   21.34   12.49
  -2 -10  -2    7.75   12.33
  -2  10  -2   -1.27   11.30
   2 -10   2    4.94   11.89
   2   0   3 7110.37  169.62
   2   0   3 6979.83  172.97
   2   0  -3 7314.86  171.81
  -2   0   3 7209.29  169.48
  -2   0   3 7323.02  175.49
   2   0   3 7069.98  175.62
  -2   0  -3 7350.02  175.68
   2   0  -3 7150.35  175.41
  -2   0   3 6980.84  173.21
  -2   0   3 7259.84  175.55
  -2   0  -3 8049.26  176.59
   2   0   3 7317.52  174.52
   2   1  -3  376.19   11.32
   2  -1  -3  356.05    8.92
  -2  -1  -3  356.33   10.14
  -2  -1  -3  344.97   10.90
   2  -1   3  346.38   11.01
  -2  -1  -3  365.96   11.18
   2  -1   3  356.72   10.56
  -2  -1  -3  338.90    9.03
  -2  -1  -3  363.91   10.98
  -2  -1   3  358.79   11.22
   2   1   3  354.92   10.27
  -2   1  -3  379.40   11.35
  -2   1   3  379.26   10.79
  -2   1  -3  346.11   10.41
   2  -1  -3  361.05   11.16
  -2   1  -3  350.32   12.15
   2  -1  -3  360.38   10.18
  -2   1  -3  345.84   10.73
  -2   1   3  336.61   10.06
  -2   1   3  332.43   11.09
  -2   1  -3  359.48   10.79
  -2  -1   3  338.03   10.32
   2  -1   3  334.53   11.24
   2   1  -3  355.19    9.86
  -2  -1  -3  358.78   11.30
   2  -1   3  354.54   10.52
   2   1   3  360.84   11.15
   2   1   3  333.73    9.09
   2   1  -3  343.11   11.09
   2  -1  -3  342.30   11.58
  -2  -1   3  358.04    9.70
   2  -1  -3  341.77   10.80
   2   1  -3  351.65   11.21
   2  -1  -3  337.00    8.82
   2   1  -3  338.18   11.86
  -2  -1   3  344.78   11.66
   2   1   3  346.44   11.19
  -2   1   3  369.13   11.52
   2   1  -3  361.03   10.41
  -2   2  -3 3842.60   91.14
  -2  -2  -3 3771.29   91.49
   2   2  -3 3725.55   90.49
   2  -2   3 3654.90   91.09
   2  -2   3 3707.69   94.38
  -2   2  -3 3934.97   93.88
   2   2  -3 3862.58   91.81
   2  -2  -3 3812.58   93.43
  -2  -2   3 3852.49   94.11
   2   2  -3 3709.88   91.71
   2  -2   3 3866.88   92.06
   2  -2   3 3738.75   90.54
   2   2   3 3682.75   91.83
  -2  -2   3 3698.82   90.12
  -2  -2   3 3759.72   90.47
   2  -2  -3 3777.75   91.25
   2  -2  -3 3846.99   91.43
   2   2  -3 3711.63   93.77
  -2   2  -3 3866.78   90.68
   2   2   3 3788.68   88.42
  -2  -2   3 3630.92   94.39
  -2   2   3 3606.72   91.61
   2  -2  -3 3890.90   91.77
   2  -2   3 3796.44   92.57
   2   2   3 3798.46   88.49
  -2  -2   3 3829.53   90.08
  -2  -2  -3 4052.31   94.57
   2  -2  -3 3716.28   94.12
   2   2   3 3860.18   91.99
  -2   2  -3 3803.69   92.51
   2   2  -3 3881.78   93.80
  -2   2  -3 3614.06   92.09
   2   2   3 3678.12   93.00
   2  -2  -3 3766.45   88.22
   2  -2  -3 3796.52   91.78
   2   2   3 3766.82   91.57
  -2  -2  -3 3750.90   92.90
  -2   3  -3  402.36   12.15
   2  -3  -3  444.29   13.13
   2  -3   3  429.16   14.25
  -2  -3  -3  425.28   11.43
  -2   3   3  415.75   11.07
  -2  -3   3  429.70   14.81
   2   3   3  439.71   11.42
   2  -3   3  445.42   13.91
  -2  -3  -3  421.44   13.33
   2   3   3  421.05   10.94
   2   3  -3  419.74   14.07
  -2   3   3  422.08   13.84
   2   3  -3  411.61   13.11
  -2   3  -3  435.43   13.78
   2   3  -3  392.84   13.34
  -2  -3  -3  443.95   14.32
   2  -3  -3  402.90   14.05
  -2   3  -3  420.00   12.41
  -2  -3  -3  433.43   10.80
  -2   3   3  421.60   13.50
   2   3   3  417.15   13.89
  -2   3  -3  407.58   14.01
  -2  -3   3  403.15   12.05
   2  -3   3  436.09   14.21
  -2  -3   3  427.23   12.38
   2   3  -3  411.54   13.61
   2  -3  -3  415.15   11.17
  -2   4  -3 4111.24  101.64
   2   4  -3 4287.74  101.76
  -2  -4   3 4215.62  105.01
   2  -4   3 4263.42  103.91
  -2  -4  -3 4302.56  104.69
  -2  -4   3 4415.84  101.24
   2   4   3 4217.74   99.16
  -2   4   3 4189.11  102.93
  -2   4  -3 4139.41  100.23
  -2   4   3 4173.00   98.86
   2   4   3 4194.26  102.78
   2   4  -3 3998.87  101.62
   2  -4  -3 3944.59   98.82
  -2  -4  -3 4325.03  102.10
   2  -4   3 4279.88  103.24
  -2   4  -3 4161.25  104.63
   2   4  -3 4121.16  104.48
  -2  -4   3 4196.16  101.36
   2  -4  -3 4268.85  104.55
  -2  -4   3 4066.32  100.51
  -2   4  -3 4045.91  100.39
  -2  -4  -3 4086.79   99.00
   2   5  -3  133.29    9.06
  -2   5  -3  127.43    5.81
  -2  -5  -3  133.72    7.70
   2  -5  -3  108.71    7.83
  -2  -5  -3  108.01    7.36
  -2   5  -3  138.02    9.32
   2   5  -3  116.56    8.39
   2  -5   3  129.88    9.20
  -2  -5   3  130.47    8.67
   2   5  -3  133.23    8.93
   2  -5  -3  145.01    9.40
  -2   5   3  125.50    9.00
  -2  -5   3  123.12    9.54
   2   5   3  123.17    8.55
  -2  -5  -3  143.89    9.36
   2  -5  -3  138.83    7.12
  -2   5  -3  133.38    9.20
  -2   5   3  132.77    6.62
   2  -5   3  137.39    9.74
  -2   6  -3  586.72   20.93
   2  -6   3  599.45   21.46
  -2   6   3  594.50   18.16
  -2  -6  -3  595.00   21.75
  -2   6  -3  604.63   20.77
   2   6  -3  598.24   18.06
   2  -6  -3  597.23   18.01
  -2   6   3  576.68   21.06
   2   6   3  625.85   21.43
   2   6  -3  623.27   20.09
   2  -6  -3  549.11   21.22
   2  -6   3  655.85   22.01
   2   6  -3  585.35   20.76
  -2  -6  -3  594.87   18.97
  -2  -6   3  610.35   22.33
   2   6  -3  589.96   21.04
   2   6   3  615.24   18.60
   2   7   3  215.87   14.26
   2   7  -3  215.75   13.90
  -2  -7  -3  233.75   11.71
   2   7  -3  222.49   13.67
  -2  -7  -3  239.19   14.84
   2  -7   3  246.78   15.06
   2   7  -3  216.73   13.86
  -2   7   3  229.44   11.71
   2   7   3  225.60   12.14
  -2   7  -3  210.10   14.04
  -2   7   3  243.19   14.85
  -2   7  -3  250.22   13.76
   2  -7  -3  228.39   14.40
  -2   8   3  606.02   21.45
   2   8  -3  671.62   29.11
  -2  -8  -3  589.57   25.28
   2  -8   3  625.87   25.40
  -2   8  -3  626.63   24.05
   2  -8  -3  642.49   25.28
   2   8   3  628.84   21.90
  -2   8   3  613.07   24.69
  -2   8  -3  621.72   24.85
   2   8   3  592.45   24.08
   2   8  -3  585.12   24.32
   2   8  -3  606.07   23.49
  -2  -8   3  569.93   25.38
   2   9  -3    4.34    8.95
  -2  -9  -3   -2.16    9.85
   2   9   3    5.67    9.14
   2   9  -3    1.42    9.25
   2  -9   3   11.16   11.56
  -2   9   3    2.80    8.84
  -2   9  -3    1.52    9.14
  -2   9  -3    5.57    8.74
   2  -9  -3    0.64    8.75
  -2  -9   3    4.50   10.37
   2  -9   3    4.91   10.20
   2 -10  -3   90.56   17.38
  -2  10   3  137.68   19.34
   2  10  -3  150.79   27.99
  -2 -10  -3  123.73   17.19
   2 -10   3  140.88   16.96
  -2 -10   3  159.60   17.67
   2  10   3  105.67   14.98
  -2   0   4 1303.15   32.45
   2   0   4 1239.46   33.54
   2   0  -4 1343.30   33.58
  -2   0   4 1231.74   33.30
  -2   0  -4 1260.74   33.45
   2   0   4 1243.16   31.48
  -2   0  -4 1266.95   33.49
  -2   0   4 1277.32   31.32
  -2   0  -4 1235.36   33.31
   2   0   4 1293.11   34.75
   2   0  -4 1279.83   33.80
   2   0   4 1270.81   33.25
  -2   0   4 1299.48   34.30
   2   0  -4 1343.92   31.45
  -2   0  -4 1245.65   33.34
  -2   0  -4 1311.27   31.49
  -2   1   4  129.31    6.29
   2  -1  -4  140.03    5.91
   2  -1  -4  143.39    4.40
  -2   1  -4  137.86    7.35
   2   1   4  144.21    6.83
   2  -1   4  146.24    6.39
  -2  -1  -4  143.47    5.89
  -2  -1   4  143.63    5.61
   2   1   4  151.87    4.76
  -2  -1  -4  145.59    4.57
   2   1  -4  153.93    7.04
  -2   1   4  139.41    6.04
   2  -1   4  138.71    6.69
   2   1  -4  146.12    6.06
  -2   1  -4  143.97    6.93
  -2  -1  -4  145.43    7.10
   2  -1   4  154.11    6.53
   2   1  -4  144.77    6.13
  -2   1  -4  136.89    6.05
   2   1   4  146.05    6.34
   2  -1  -4  140.07    4.24
   2  -1  -4  146.45    7.07
  -2  -1  -4  137.31    7.30
  -2   1   4  153.21    7.35
  -2   1  -4  153.91    6.85
  -2  -1   4  145.70    7.55
   2   1  -4  150.07    7.22
   2  -1  -4  144.43    6.89
   2   2  -4  384.47   12.22
   2  -2  -4  399.27   13.45
  -2   2  -4  383.04   12.32
   2  -2   4  373.97   12.43
   2   2  -4  375.16   12.84
  -2   2  -4  396.58   13.29
   2   2   4  372.23   11.09
  -2   2   4  345.19   10.73
  -2   2  -4  379.27   12.18
  -2  -2  -4  386.33   12.87
  -2   2   4  384.81   12.56
  -2   2  -4  359.65   12.83
   2   2  -4  371.94   13.03
  -2  -2  -4  382.04   12.88
   2   2  -4  347.95   11.55
   2  -2  -4  374.56   12.61
  -2  -2  -4  374.25   10.81
   2  -2   4  362.80   12.50
   2  -2  -4  363.76   10.75
   2   2   4  395.38   12.94
  -2   2  -4  360.35   13.43
  -2  -2   4  376.65   10.90
  -2  -2   4  391.84   13.95
  -2   3   4  461.56   15.21
   2   3  -4  486.49   15.80
  -2  -3  -4  466.57   15.01
   2   3   4  463.28   12.21
  -2  -3   4  467.49   16.62
  -2   3  -4  461.24   15.67
   2   3  -4  463.35   14.98
   2  -3  -4  436.03   15.61
   2   3   4  475.27   15.52
   2  -3  -4  443.87   11.73
   2  -3   4  483.56   15.38
   2   3   4  445.72   11.48
  -2  -3   4  430.27   13.39
  -2  -3  -4  452.47   15.51
  -2  -3   4  442.14   13.18
  -2   3  -4  478.72   15.05
   2  -3  -4  459.12   14.75
   2   3   4  462.99   11.65
  -2  -3  -4  444.29   11.99
   2   3  -4  436.42   14.59
   2  -3  -4  431.41   11.66
   2  -3   4  447.78   16.25
   2  -4  -4  584.10   19.80
   2  -4   4  613.44   19.42
  -2  -4  -4  625.08   18.77
  -2   4   4  593.68   15.18
   2   4   4  603.83   15.68
   2   4  -4  622.55   19.87
   2   4  -4  593.41   18.08
  -2   4  -4  582.00   17.73
   2   4   4  593.69   19.47
   2  -4  -4  572.65   15.30
  -2  -4  -4  575.51   19.70
  -2  -4   4  618.32   20.58
  -2  -4   4  596.71   17.35
   2  -4   4  596.44   19.31
  -2   4  -4  557.87   19.53
  -2   4   4  593.00   19.45
  -2   4  -4  573.51   19.02
   2   4  -4  582.89   19.05
  -2   4  -4  581.81   17.07
   2  -4  -4  605.87   18.26
  -2  -5  -4   87.47    7.31
   2  -5  -4   67.61    7.57
   2  -5  -4   85.85    6.69
  -2  -5  -4   62.78    7.16
  -2   5  -4   86.97    8.33
  -2   5  -4   85.52    5.61
   2  -5   4   69.78    7.86
  -2   5  -4   52.36    6.73
   2   5  -4   83.37    8.13
   2   5  -4   81.88    6.41
  -2  -5   4   95.49    9.15
  -2   5   4   71.69    7.35
   2   5   4   73.20    7.54
   2   5  -4   74.30    7.29
   2   5   4   78.37    5.83
  -2  -5   4   80.13    7.53
   2  -5   4   79.41    7.97
  -2   5   4   83.33    5.31
  -2  -6  -4  268.70   16.10
  -2   6  -4  173.41   15.47
   2  -6   4  244.66   13.77
  -2  -6   4  231.23   14.69
   2   6  -4  219.18   13.52
  -2   6   4  241.69   15.57
  -2  -6   4  257.61   12.36
  -2   6  -4  255.39   13.54
   2   6  -4  212.84   17.51
   2   6  -4  251.08   11.32
  -2  -6  -4  247.75   11.86
   2  -6  -4  230.27   11.15
   2   6   4  277.46   19.65
   2  -6   4  241.72   13.65
   2   6   4  241.97   10.33
  -2   6   4  222.47    9.73
  -2  -7  -4  282.93   16.42
   2  -7   4  295.07   16.81
   2   7  -4  273.76   16.10
   2  -7  -4  315.24   16.64
   2   7  -4  293.28   15.99
   2   7   4  257.20   16.19
  -2  -7  -4  298.43   13.78
  -2  -7   4  300.59   17.05
  -2   7   4  292.41   16.50
   2  -7   4  298.49   16.06
  -2  -7   4  309.00   15.34
  -2   7  -4  263.42   15.63
  -2   7  -4  277.63   16.19
   2  -8  -4  130.42   13.58
  -2   8  -4  141.00   12.71
  -2  -8   4  122.76   13.36
   2  -8   4  138.84   14.58
   2   8   4  116.02   12.26
   2  -8   4  125.67   12.73
  -2   8  -4  132.36   13.11
  -2  -8  -4  157.26   14.60
  -2   8   4  123.39   12.83
   2   8  -4  116.37   12.20
   2   8  -4  136.12   13.35
  -2  -9   4   23.52   11.46
  -2   9  -4    9.89    9.36
   2  -9   4   16.81   10.31
  -2  -9  -4   10.30   10.17
   2  -9  -4   10.18   10.43
  -2   9   4   10.44   10.20
   2   9  -4   25.13   10.92
   2   9  -4   12.17    9.99
   2   9   4   12.18   10.69
  -2   9  -4   11.40   10.42
   2   0  -5  807.75   22.89
   2   0   5  808.98   22.90
  -2   0  -5  783.88   23.18
  -2   0   5  845.66   23.96
  -2   0  -5  776.99   20.69
   2   0  -5  830.65   23.71
   2   0   5  802.96   22.81
   2   0   5  782.55   20.88
   2   0  -5  795.63   22.33
  -2   0  -5  815.64   22.92
  -2   0   5  772.34   20.63
   2   0  -5  817.02   20.78
   2  -1  -5  414.38   14.15
   2  -1   5  419.23   13.69
  -2  -1  -5  413.48   12.90
  -2   1  -5  426.86   14.05
  -2  -1  -5  415.95   14.27
   2   1  -5  397.98   12.96
   2  -1   5  411.39   13.52
   2   1  -5  413.98   12.58
  -2  -1  -5  389.76   10.68
  -2   1  -5  400.39   12.59
  -2  -1  -5  405.42   13.93
   2   1   5  394.29   10.89
   2  -1  -5  405.27   12.91
  -2  -1   5  417.93   14.86
  -2   1  -5  399.18   13.87
   2   1  -5  380.55   14.03
  -2  -1   5  433.07   12.51
   2   1   5  422.47   14.04
  -2  -1   5  385.31   12.69
  -2   1   5  394.14   13.00
   2  -1  -5  407.66   10.59
   2   1  -5  388.24   13.92
  -2   1   5  415.20   13.35
  -2   1   5  405.02   14.36
  -2   1  -5  366.49   14.09
  -2  -2  -5 2560.37   63.87
  -2  -2   5 2598.12   66.87
   2   2  -5 2495.68   66.29
   2  -2   5 2606.38   64.62
   2  -2  -5 2645.63   66.65
  -2   2  -5 2584.70   64.66
  -2  -2   5 2591.36   62.92
   2   2   5 2422.27   64.81
  -2  -2  -5 2617.70   66.03
  -2   2   5 2586.57   64.82
   2   2  -5 2481.35   65.06
  -2  -2  -5 2579.78   65.37
   2  -2  -5 2544.52   63.90
  -2   2  -5 2594.65   63.67
  -2   2  -5 2628.62   66.63
  -2   2   5 2534.12   63.76
   2   2   5 2638.86   65.32
   2  -2   5 2629.59   65.36
   2   2  -5 2552.39   63.57
   2  -2  -5 2631.03   65.41
   2   3  -5  127.98    8.13
   2  -3  -5  121.28    4.98
   2  -3  -5  138.70    8.62
   2  -3  -5  129.92    5.12
  -2  -3   5  129.76    6.42
  -2   3  -5  132.54    8.37
  -2  -3  -5  122.91    5.21
  -2  -3   5  141.04    9.60
   2   3   5  131.17    5.98
  -2   3   5  133.78    8.34
  -2  -3  -5  126.35    8.41
   2   3  -5  140.13    8.85
  -2  -3   5  125.78    8.81
   2   3  -5  130.55    8.24
   2  -3   5  140.66    8.50
   2   3   5  128.09    8.51
   2  -3   5  142.82    8.43
  -2   3  -5  127.25    7.66
   2  -3  -5  109.83    8.53
  -2   3  -5  119.11    8.67
  -2  -3  -5  122.50    8.25
  -2   4   5  467.11   17.70
  -2   4  -5  519.95   16.14
  -2  -4   5  514.60   19.05
   2   4  -5  497.71   17.46
  -2   4  -5  506.46   18.53
   2   4   5  474.14   17.80
  -2  -4  -5  509.58   17.40
   2  -4   5  507.72   17.43
   2   4  -5  495.70   16.92
  -2  -4  -5  516.24   18.48
   2   4  -5  456.29   17.82
  -2  -4   5  481.46   15.13
   2  -4  -5  500.79   18.52
  -2   4  -5  509.90   17.63
   2  -4   5  518.94   17.89
   2  -4  -5  472.41   17.00
   2  -5   5  224.97   12.22
  -2   5   5  235.04   12.88
  -2  -5   5  220.90   13.69
  -2   5  -5  204.22   10.20
   2  -5  -5  224.94   11.43
  -2   5  -5  220.54   12.77
  -2   5  -5  201.52   12.31
   2  -5  -5  201.74   12.32
   2   5  -5  218.21   11.18
   2   5  -5  231.24   12.65
   2   5  -5  209.61   12.60
  -2  -5  -5  230.87   12.99
   2  -5   5  217.44   12.66
  -2  -5  -5  229.43   11.85
  -2  -5   5  219.31   10.11
  -2   6   5 1110.67   35.71
  -2   6  -5 1161.60   35.38
   2   6  -5 1116.22   35.23
  -2  -6  -5 1233.03   34.30
   2  -6   5 1212.11   35.11
  -2  -6  -5 1162.05   36.71
  -2   6  -5 1152.79   36.17
   2  -6   5 1182.46   35.75
   2  -6  -5 1167.23   36.65
   2   6  -5 1173.42   32.84
   2   6   5 1143.68   35.70
  -2  -6   5 1197.70   37.18
   2   6  -5 1227.38   36.70
   2  -6  -5 1139.78   33.36
  -2  -7   5   44.37    9.86
  -2  -7  -5   41.62    7.87
   2   7   5   49.75    9.85
   2   7  -5   41.21    8.88
   2   7  -5   28.52    8.14
   2  -7   5   41.80    9.54
   2  -7  -5   36.75    7.47
  -2   7  -5   30.42    8.33
   2  -7  -5   32.62    8.50
  -2   7  -5   50.73    9.84
   2  -7   5   40.60    9.06
  -2  -7  -5   34.57    9.39
  -2   7   5   25.12    8.60
  -2  -8  -5  134.47   13.86
   2   8   5  159.26   14.95
  -2   8  -5  159.87   14.68
   2   8  -5  155.58   14.10
  -2   8   5  151.25   14.89
  -2   8  -5  140.07   13.92
   2   8  -5  162.18   14.61
   2  -8   5  164.91   14.80
   2  -8  -5  127.72   14.04
  -2  -8   5  155.40   15.37
   2  -9  -5   62.36   12.73
  -2  -9   5   68.94   14.26
   2   9  -5   62.66   13.06
  -2   9  -5   63.62   12.89
  -2   9  -5   70.73   13.20
  -2  -9  -5   43.53   12.81
   2   9   5   73.62   13.45
   2   9  -5   63.90   13.16
  -2   9   5   68.11   13.77
  -2   0  -6   70.78    6.73
   2   0   6   78.22    5.51
  -2   0  -6   74.04    6.40
   2   0   6   82.55    6.68
  -2   0   6   73.41    5.43
  -2   0   6   85.72    6.33
   2   0  -6   92.56    7.83
  -2   0   6   98.12    7.90
   2   0   6   81.70    6.70
  -2   0  -6   79.29    5.05
   2   0  -6   95.00    6.98
   2   0  -6   84.13    5.17
  -2   1  -6   73.99    6.54
   2  -1  -6   55.79    6.38
  -2  -1   6   76.84    5.80
   2  -1   6   76.86    6.48
   2  -1  -6   71.31    3.76
   2  -1   6   86.27    6.86
   2   1  -6   76.40    7.09
   2   1  -6   71.87    6.52
  -2  -1  -6   59.44    6.19
   2   1   6   72.34    4.66
   2   1   6   78.39    6.71
  -2  -1   6   76.90    7.55
  -2  -1  -6   92.91    6.41
   2   1  -6   79.19    5.70
   2  -1  -6   90.56    6.57
  -2   1   6   79.33    6.54
  -2  -1  -6  107.84    7.77
  -2   1  -6   72.00    6.55
  -2   1   6   73.20    6.97
  -2   1  -6   78.39    5.81
  -2  -1  -6   81.51    3.97
   2   2  -6   76.26    6.48
  -2   2  -6   89.38    6.86
  -2   2  -6   85.16    7.48
  -2  -2  -6   82.29    7.49
   2  -2   6  105.18    8.01
   2  -2   6  103.96    7.58
   2   2  -6   91.72    7.71
   2  -2  -6  104.79    8.80
  -2   2  -6   97.35    8.18
   2  -2  -6  112.91    8.90
   2   2  -6   90.32    8.10
  -2  -2  -6   88.29    7.65
   2  -2  -6   89.16    6.20
  -2  -2   6  108.69    8.97
  -2  -2  -6   90.29    7.05
  -2   2   6  104.18    7.70
   2   2   6   91.44    7.75
  -2  -3  -6  142.05   10.08
  -2  -3   6  121.78    6.98
   2  -3  -6  109.00    8.48
   2  -3   6  119.39    8.59
  -2  -3  -6  124.92    9.38
  -2   3   6   99.59    8.20
   2  -3   6  124.63    9.08
   2   3  -6  126.65    9.21
   2   3  -6  133.20    8.92
  -2   3  -6   87.26    8.20
  -2  -3  -6  117.18    6.05
   2  -3  -6  119.00    6.02
  -2  -3   6  120.58    9.90
  -2   3  -6  120.93    8.66
   2   3  -6  133.57    9.80
   2  -3  -6  128.05   10.03
   2   3   6  131.56    9.58
  -2   3  -6  120.46    8.86
  -2   4  -6  111.24    8.32
  -2  -4  -6  138.76   10.92
   2   4   6  134.85   10.30
  -2   4   6   95.78    8.48
   2  -4  -6  115.51    9.16
   2   4  -6  130.07    9.52
   2  -4  -6  113.29    9.93
   2   4  -6   93.39    8.74
   2   4  -6  127.85   10.56
   2  -4   6  128.99    9.70
  -2   4  -6  116.87   10.05
  -2  -4  -6  102.48    9.11
   2  -4   6  127.04    9.61
  -2  -4   6  125.61   10.66
  -2   4  -6  116.59    9.66
  -2  -4   6  121.91    8.76
  -2  -5   6  277.91   15.80
   2  -5  -6  267.95   14.14
  -2   5  -6  294.43   15.56
   2  -5   6  284.87   14.95
  -2   5  -6  298.56   15.20
  -2  -5  -6  299.38   15.73
   2   5  -6  299.79   15.13
  -2   5   6  324.58   15.82
   2  -5  -6  297.89   16.31
  -2  -5  -6  300.29   14.89
   2  -5   6  263.66   14.14
   2   5  -6  304.86   14.29
   2   5   6  303.73   15.51
   2   5  -6  343.05   16.44
  -2   5  -6  286.82   13.32
  -2  -6  -6   68.62   10.67
   2   6   6   53.55    8.97
   2  -6   6   47.26    8.54
  -2   6  -6   45.55    9.05
   2  -6  -6   55.66    8.41
   2   6  -6   51.61    7.89
   2  -6  -6   56.87    9.86
   2   6  -6   47.66    9.47
   2  -6   6   55.87    9.31
  -2  -6   6   47.85    9.78
  -2   6   6   38.08    8.86
  -2   6  -6   65.53   10.15
   2   6  -6   62.47    9.44
  -2  -7  -6  224.50   16.76
  -2  -7   6  226.64   17.18
   2   7  -6  198.18   15.33
   2   7   6  237.44   16.99
  -2   7  -6  229.82   16.45
  -2   7  -6  239.31   17.12
  -2  -7  -6  221.71   15.29
   2  -7  -6  220.81   16.85
   2   7  -6  256.87   17.49
  -2   7   6  225.09   16.93
   2  -7  -6  225.21   14.92
  -2   8   6   31.32   10.96
   2   8   6   37.07   11.60
   2   8  -6   34.55   11.19
   2   8  -6   29.82   10.92
  -2  -8  -6   35.43   11.06
  -2   8  -6   33.28   11.15
  -2   8  -6   21.95   10.63
   2  -8  -6   31.47   11.01
  -2  -8   6   32.88   11.87
  -2  -9  -6  224.07   19.95
   2   9  -6  163.18   20.05
  -2   9  -6  275.72   21.80
   2  -9  -6  283.58   22.34
  -2   0   7  152.03   10.26
   2   0  -7  167.29   10.87
  -2   0  -7  137.12    6.96
  -2   0  -7  158.38   10.51
   2   0  -7  141.37    7.06
  -2   0  -7  140.21    9.48
  -2   0   7  138.68    8.63
   2   0   7  152.31    9.68
   2   0   7  131.05    9.45
   2   1  -7  180.21   10.77
  -2   1  -7  193.03    8.97
  -2  -1  -7  193.43   11.28
   2  -1  -7  178.93   11.18
  -2   1  -7  176.48   11.05
  -2  -1  -7  182.57    9.73
   2  -1  -7  182.16    9.73
  -2  -1  -7  182.16   11.38
   2   1  -7  165.12    8.83
  -2   1   7  202.08   11.57
   2  -1   7  173.92   10.37
  -2  -1   7  179.21   11.71
   2   1   7  179.95   10.76
   2   1  -7  177.15   11.11
  -2   1   7  201.19   10.43
  -2   1  -7  180.33   10.78
  -2  -1   7  177.52    9.15
   2  -1   7  174.16   10.27
   2  -2  -7   10.42    5.58
  -2   2  -7   11.11    4.79
  -2   2   7    8.23    4.91
  -2  -2  -7   10.88    4.14
  -2  -2   7   12.59    6.15
   2  -2  -7   13.00    4.27
   2  -2  -7   10.26    5.32
  -2  -2   7   13.91    4.30
   2   2  -7   11.96    4.69
  -2   2  -7   12.25    5.58
  -2  -2  -7   14.02    5.80
   2   2  -7   13.79    5.56
  -2  -2  -7   14.97    5.88
   2  -2   7   16.93    5.45
   2   2   7   22.21    6.02
  -2   2  -7   18.70    5.73
   2   2  -7    6.25    5.33
   2  -2   7   12.55    4.98
   2  -3  -7  268.50   13.82
   2   3  -7  278.52   14.15
  -2  -3   7  263.48   10.93
   2  -3   7  285.92   12.86
  -2  -3  -7  252.69   13.92
  -2  -3   7  254.59   14.51
  -2  -3  -7  249.52   16.73
  -2   3  -7  270.23   13.53
   2  -3   7  275.37   13.43
   2   3   7  263.82   14.25
   2   3  -7  252.17   12.83
  -2   3  -7  263.64   13.02
  -2   3   7  255.24   13.30
  -2   4   7   98.98   10.14
  -2   4  -7   67.17    8.88
   2   4  -7  119.26   11.37
   2  -4   7  102.26    9.63
   2  -4  -7  120.03   11.59
  -2  -4  -7  118.99   11.25
   2   4   7  113.57   10.50
   2   4  -7  112.07    9.90
   2  -4   7   93.18    8.63
  -2  -4  -7   89.80    9.47
  -2  -4   7   85.46   10.30
  -2   4  -7   83.15    9.00
  -2   4  -7   99.69    9.19
   2   4  -7  102.17    9.51
  -2   5  -7   61.20    9.20
  -2   5  -7   64.36    8.41
  -2  -5  -7   53.05    9.39
   2   5   7   63.04    9.83
  -2  -5  -7   45.44    8.52
   2  -5  -7   81.64   10.94
  -2   5   7   73.13   10.59
  -2  -5   7   68.74   10.74
   2   5  -7   79.65   10.01
   2  -5   7   64.79    8.29
   2  -5  -7   68.23    9.34
  -2   5  -7   80.33   10.53
   2   5  -7   67.20    9.01
   2  -5   7   74.47    9.70
   2   5  -7   55.31    9.49
  -2   6   7   19.67    8.81
  -2  -6  -7   19.85    9.01
   2  -6  -7   27.98    9.10
   2   6  -7   19.20    8.38
   2  -6   7   31.44    9.45
   2   6  -7   32.42    9.34
   2   6   7   20.53    8.18
   2  -6  -7   26.17    8.32
  -2   6  -7   26.01    9.27
  -2  -6   7   25.06    9.87
  -2   6  -7   13.80    8.30
   2   6  -7   31.41    8.65
  -2  -6  -7   27.25    8.65
  -2  -7  -7   77.88   11.09
  -2   7   7  103.74   13.54
  -2  -7  -7   79.53   12.34
   2  -7  -7   75.27   12.50
  -2  -7   7   78.31   12.88
  -2   7  -7  108.70   13.52
   2  -7  -7   99.58   12.21
  -2   7  -7  123.79   14.35
   2   7  -7   75.26   11.83
   2   7  -7   80.92   11.92
   2   7   7   83.91   12.15
  -2  -8   7    9.65   12.03
   2  -8  -7    9.08   12.51
  -2   8  -7    2.84   12.75
   2   8  -7    7.58   11.34
  -2   8  -7   20.11   11.64
   2   8  -7   11.00   13.40
  -2   8   7    8.81   14.84
   2   8   7    7.09   14.52
  -2   0  -8   80.23    8.90
   2   0  -8   76.12    9.23
   2   0   8   91.70    8.95
   2   0  -8   83.39    8.54
   2   0   8   89.28    8.70
  -2   0  -8   87.15    8.54
  -2   0   8   92.52    8.07
  -2   0   8   76.16    9.06
  -2  -1   8  171.75   12.62
   2  -1   8  177.46   11.34
  -2   1   8  166.92   11.27
  -2   1  -8  193.96   12.34
   2  -1   8  180.18   11.87
  -2  -1  -8  153.64   11.76
   2  -1  -8  158.35   10.65
   2   1  -8  172.32    9.59
   2   1   8  164.74   11.35
   2  -1  -8  184.31   13.07
  -2  -1  -8  173.35   12.38
  -2  -1   8  157.38   10.18
  -2   1  -8  174.42    9.69
  -2  -1  -8  168.96   10.92
   2   1  -8  177.01   12.73
   2   1  -8  194.08   12.16
  -2   1  -8  176.81   12.29
   2  -2   8  694.20   23.84
  -2  -2  -8  681.99   25.16
   2  -2   8  691.75   23.24
  -2  -2  -8  699.52   24.89
  -2   2  -8  717.18   22.41
   2  -2  -8  715.77   25.29
  -2   2  -8  666.68   24.17
   2   2  -8  657.63   22.04
   2  -2  -8  705.65   22.08
   2   2  -8  690.71   24.81
  -2  -2  -8  690.69   21.83
   2   2   8  722.48   24.50
  -2  -2   8  748.92   22.04
   2   2  -8  710.32   24.74
   2  -2  -8  693.31   25.39
  -2   2   8  704.96   23.74
  -2  -2   8  715.99   25.45
  -2   2  -8  693.09   24.71
  -2   3   8   13.98    6.66
   2  -3  -8   16.69    7.41
  -2   3  -8   25.64    7.77
  -2   3  -8   31.43    7.19
   2  -3   8   15.53    7.09
   2  -3  -8   14.80    7.36
  -2   3  -8   26.54    8.55
   2   3   8   21.62    7.65
   2   3  -8   27.38    7.52
   2   3  -8   20.61    7.63
   2   3  -8   24.96    7.13
  -2  -3  -8   30.19    8.40
  -2  -3  -8   20.53    7.31
   2  -4   8   61.67    9.22
  -2  -4  -8   68.30   10.12
  -2  -4   8   88.51   11.31
  -2   4  -8   67.04    9.27
  -2  -4  -8   82.51   10.15
   2  -4  -8   70.73   10.64
   2   4  -8   59.57   10.06
  -2   4  -8   78.33   11.02
  -2   4   8   76.88   10.17
   2  -4  -8   80.86   10.70
   2   4  -8   67.15    9.57
   2   4   8   58.96    9.34
   2   4  -8   68.18    9.59
   2  -4   8   70.62    8.85
  -2  -5  -8  284.22   18.02
   2   5  -8  313.51   18.04
   2  -5  -8  291.35   18.45
   2  -5  -8  286.02   17.98
   2   5   8  267.15   17.53
   2   5  -8  304.36   17.48
  -2  -5   8  298.13   19.29
  -2   5  -8  275.64   18.21
   2   5  -8  293.68   18.39
  -2  -5  -8  293.23   17.99
  -2   5   8  304.07   18.89
   2  -5   8  318.25   17.51
  -2   5  -8  295.48   17.84
  -2   6  -8  177.35   15.71
  -2  -6  -8  264.06   18.20
   2   6  -8  205.31   16.78
  -2   6   8  200.25   16.11
   2   6   8  249.88   18.21
   2  -6  -8  241.47   17.99
  -2   6  -8  233.63   16.84
  -2  -6  -8  252.24   18.83
   2   6  -8  252.51   18.55
  -2  -6   8  236.15   17.93
   2  -6  -8  262.80   18.52
   2  -7  -8    3.91   10.31
  -2   7  -8   -5.17   10.84
  -2   7   8   -3.13   10.47
   2   7   8   -0.18   11.95
   2   7  -8   -2.16   10.17
  -2   7  -8   -2.08   10.60
   2  -7  -8   -5.96   12.48
  -2  -7   8    8.35   12.32
  -2  -7  -8    6.96    9.60
  -2  -7  -8    1.68   10.52
   2   7  -8   -2.18   10.54
  -2   0   9  389.00   18.74
   2   0  -9  394.64   19.24
  -2   0  -9  374.19   17.50
  -2   0   9  381.57   16.65
  -2   0  -9  385.87   19.02
   2   0  -9  404.31   17.90
   2   0   9  355.41   17.44
   2   1  -9  148.87   12.11
  -2  -1  -9  144.34   11.04
   2   1  -9  147.47   12.61
  -2  -1  -9  140.63   12.27
   2  -1  -9  127.96   11.99
  -2  -1   9  123.95    9.98
  -2   1   9  134.15   12.52
  -2   1   9  135.52   11.27
  -2   1  -9  139.13   12.40
   2  -1   9  148.06   11.53
   2  -1   9  124.23   11.31
   2  -1  -9  143.67   11.01
  -2  -1   9  146.80   12.90
   2   1   9  146.56   12.01
  -2  -1  -9  153.33   12.78
  -2   1  -9  156.38   12.50
  -2  -2  -9 1193.35   36.94
   2  -2   9 1100.27   34.27
   2  -2   9 1076.23   34.93
   2   2   9 1088.04   35.31
  -2   2  -9 1181.30   35.99
  -2  -2  -9 1180.47   36.69
  -2  -2   9 1122.70   36.68
   2   2  -9 1130.79   36.36
   2  -2  -9 1100.80   36.81
  -2   2  -9 1129.76   36.40
  -2   2   9 1095.61   34.68
   2  -2  -9 1159.08   36.93
   2   2  -9 1157.43   36.33
   2   3  -9   97.22   10.23
  -2   3  -9   84.29   11.23
  -2  -3  -9  138.52   13.39
   2  -3   9  126.30   11.80
   2  -3  -9   81.19   11.53
  -2   3  -9  103.40   11.82
   2  -3   9   99.75   10.41
   2  -3  -9   98.35   12.22
  -2  -3  -9  105.94   12.20
  -2  -3   9  102.56   12.42
   2   3  -9   79.01   10.91
  -2   3  -9  102.62   10.33
  -2   3   9  109.13   11.50
   2   3   9  101.32   11.79
   2   3  -9  121.95   12.82
  -2   4   9  198.24   15.18
  -2  -4   9  204.84   16.04
  -2   4  -9  203.45   14.86
  -2   4  -9  192.81   15.38
   2   4  -9  185.05   13.79
   2   4  -9  187.75   14.71
   2  -4  -9  214.28   15.99
   2  -4  -9  188.41   15.78
  -2   4  -9  240.98   16.17
  -2  -4  -9  177.60   14.87
   2   4   9  192.05   15.46
  -2  -4  -9  182.03   15.44
   2   4  -9  189.53   15.88
  -2   5  -9  103.80   12.47
   2   5   9   98.10   13.50
  -2   5   9  110.60   13.80
  -2   5  -9   87.64   12.83
  -2  -5  -9   87.59   12.01
  -2   5  -9   99.75   12.27
   2   5  -9   96.38   13.41
   2  -5  -9  108.63   14.07
  -2  -5  -9  109.35   14.16
   2   5  -9   83.91   11.92
  -2  -5   9  126.51   14.65
   2   5  -9   79.34   11.95
   2  -5  -9   88.23   12.70
   2   6   9  551.40   33.24
  -2  -6   9  533.00   27.12
   2   6  -9  517.92   25.77
  -2  -6  -9  517.85   25.82
   2  -6  -9  526.32   38.03
  -2  -6  -9  482.70   26.18
  -2   6   9  516.49   26.35
  -2   6  -9  513.91   24.88
   2  -6  -9  527.05   26.21
  -2   0 -10    4.88    9.56
  -2   0 -10    0.57    8.23
   2   0  10    4.52    8.03
  -2   0  10    4.18    7.87
  -2   0 -10    8.67    9.57
   2   0 -10    4.24    8.86
  -2   0  10    6.76    8.96
   2   0 -10    2.19    8.42
  -2  -1 -10   12.07    9.23
   2   1 -10    0.44    9.10
  -2   1  10    4.01    7.71
   2  -1  10    8.63    8.42
  -2  -1  10    9.12    9.25
  -2   1 -10    5.15    8.88
   2   1  10    5.29    8.33
  -2  -1 -10    3.67    9.42
   2  -1 -10    5.85    8.74
   2   1 -10    3.06    8.76
  -2   1 -10    7.26    9.14
   2  -1  10    5.01    8.68
   2  -1 -10    9.02    9.90
  -2  -2 -10   -0.96    9.23
  -2   2 -10    4.33    9.15
  -2   2 -10   -2.98    8.88
   2  -2 -10   -1.39    9.06
   2   2  10    4.01    8.86
  -2  -2  10   11.63    9.51
   2   2 -10    2.95    9.23
  -2  -2 -10   14.54    9.83
   2  -2  10    0.34    8.14
   2   2 -10    1.91    9.29
   2  -2  10    7.35    8.50
  -2   2  10   -0.89    8.20
   2  -2 -10    2.68    9.51
  -2   3 -10    3.40    9.63
  -2  -3  10    1.09    9.72
  -2   3 -10    1.15    9.55
   2  -3 -10    6.18   10.17
   2   3  10    1.41    9.30
  -2   3  10   -0.29    8.57
   2  -3 -10    6.18   10.08
  -2  -3 -10    0.49    9.83
   2   3 -10    1.30    9.32
  -2  -3 -10    4.50    9.06
   2   3 -10    2.18    9.85
  -2   4 -10    0.99   10.50
   2  -4 -10    3.28   10.52
  -2  -4 -10    3.96   10.64
   2   4 -10    5.49   10.63
  -2  -4 -10   -4.59   10.58
   2   4  10    0.67    9.91
  -2   4  10    3.95    9.89
  -2  -4  10    9.32   11.38
   2  -4 -10    2.31   11.74
  -2   4 -10   -4.45   10.49
   2   4 -10    4.71   10.19
  -2  -5  10   23.93   13.01
  -2   5 -10   42.35   13.04
   2  -5 -10   35.38   13.09
  -2  -5 -10   33.83   14.73
  -2   5 -10   33.80   11.64
   2   5  10   30.31   20.64
   2   5 -10   38.49   13.19
  -2   5  10   31.02   12.04
   2   5 -10   34.96   11.75
   2   5 -10   23.25   12.27
   2  -5 -10   47.29   13.31
  -2  -5 -10   55.18   14.49
  -2   0  11  316.27   21.04
   2   0  11  292.14   19.96
  -2   0 -11  279.07   21.14
  -2   0 -11  285.35   21.49
   2   0 -11  266.27   19.79
  -2   1 -11   94.45   13.28
  -2  -1 -11   75.33   13.68
   2  -1 -11   87.11   17.08
  -2  -1 -11   96.28   16.38
  -2   1 -11   86.02   13.63
   2   1 -11   76.12   13.49
  -2  -1  11   73.61   13.36
  -2   1 -11   82.86   17.64
   2  -1 -11   69.46   14.20
   2   1 -11   82.89   13.07
   2   1  11   81.70   13.07
  -2   2 -11  615.96   28.33
  -2   2 -11  570.74   27.38
  -2  -2 -11  595.22   29.81
   2  -2 -11  580.54   28.53
   2  -2 -11  550.21   31.99
  -2  -2 -11  569.36   27.79
   2   2 -11  555.00   27.32
  -2   2  11  562.68   26.17
   2   2 -11  599.45   27.56
  -2  -2  11  636.59   28.42
   2   2  11  571.18   27.29
   2   3 -11   28.63   12.29
  -2  -3 -11   21.06   13.09
   2  -3 -11   23.24   12.97
  -2   3 -11   18.67   12.05
  -2  -3 -11   27.74   12.71
  -2   3  11   26.95   11.74
  -2  -3  11   16.50   12.23
   2   3 -11   22.96   12.61
   2   3  11   25.38   11.81
  -2   3 -11   13.50   13.28
   3   0   0   -1.56    1.06
   3   0   0   -0.26    1.06
  -3   0   0   -1.66    1.07
   3   0   0   -1.40    0.91
   3   0   0   -0.40    0.87
   3   0   0    1.85    1.10
  -3   0   0    1.70    1.26
  -3   1   0   -0.42    0.91
   3  -1   0    7.19    1.26
  -3   1   0    3.34    1.37
   3   1   0   -0.44    1.04
   3   1   0    0.32    1.26
   3  -1   0    6.89    1.75
   3  -1   0    1.80    0.90
   3   1   0    0.66    0.86
  -3  -1   0    1.13    1.53
   3   1   0    0.43    1.01
   3  -1   0   -0.53    0.78
  -3  -1   0   -1.30    1.09
   3  -1   0    1.85    0.94
  -3  -1   0    0.26    1.09
  -3  -1   0    2.77    1.00
  -3  -1   0   -0.08    0.92
  -3   1   0    1.83    1.07
   3   1   0    0.10    1.52
   3  -1   0   -0.73    1.04
   3   2   0    2.04    1.61
   3   2   0    2.05    1.46
  -3   2   0    4.97    1.52
   3   2   0    0.51    1.73
   3   2   0   10.87    1.66
  -3  -2   0    3.21    1.71
   3   2   0    1.85    1.38
   3  -2   0    2.33    1.63
  -3  -2   0    1.85    2.26
  -3   2   0    2.45    1.50
   3  -2   0    1.82    1.47
   3  -2   0    3.93    1.57
  -3   2   0   -3.45    1.28
   3  -2   0    2.59    2.24
  -3   2   0    2.92    1.85
   3  -2   0    0.57    0.83
  -3  -2   0    4.93    1.79
  -3   2   0    4.76    1.03
   3   2   0    0.32    2.21
  -3  -2   0   -3.37    1.11
   3   3   0    1.45    2.05
  -3   3   0    1.08    1.69
   3   3   0    1.36    1.78
  -3   3   0    0.96    2.37
  -3   3   0    2.00    2.12
  -3  -3   0    1.75    1.86
   3   3   0    5.15    1.96
   3   3   0   -0.23    3.05
  -3   3   0   -0.08    2.02
  -3  -3   0    1.13    2.11
  -3  -3   0   -1.09    1.98
   3  -3   0   13.86    2.92
   3  -3   0    1.31    1.92
   3   3   0   -0.68    2.09
  -3  -3   0    0.93    3.00
  -3  -3   0   -0.09    2.01
   3  -3   0    0.90    3.15
   3  -3   0    3.81    3.07
   3   4   0    1.25    2.36
  -3  -4   0    0.14    2.74
  -3   4   0   -0.04    3.64
  -3   4   0    0.40    2.68
  -3  -4   0   -0.67    3.16
   3  -4   0    0.48    2.52
   3  -4   0    0.69    2.56
   3   4   0    1.63    2.55
   3   4   0    1.33    2.30
  -3   4   0    4.34    2.89
  -3   4   0    0.76    2.25
  -3  -4   0   -0.75    2.24
  -3  -4   0    0.69    2.99
  -3  -5   0   -0.07    4.10
   3   5   0   -0.95    3.62
  -3   5   0    1.14    3.55
   3   5   0    2.17    3.31
  -3  -5   0   -0.13    2.67
   3   5   0    7.83    3.12
   3   5   0    0.79    3.10
  -3   5   0    3.87    3.51
   3  -5   0   -0.20    3.43
  -3  -5   0   -0.48    3.76
   3  -5   0    1.11    3.51
  -3   6   0    3.12    4.60
   3   6   0    2.54    4.26
   3   6   0    2.77    3.87
   3   6   0    7.60    4.63
  -3   6   0    6.11    4.66
  -3  -6   0    3.90    5.35
  -3   6   0    7.81    3.94
   3  -6   0    4.09    4.65
  -3  -7   0    3.61    3.92
   3   7   0    7.79    5.49
  -3   7   0    4.64    6.15
  -3   7   0    6.60    5.89
   3   7   0    1.76    5.34
   3   7   0    0.49    4.89
   3  -7   0    3.70    6.23
  -3   7   0   -1.20    4.90
   3   8   0   -0.03    6.27
   3  -8   0    2.16    7.36
   3   8   0    2.16    6.52
   3   8   0   -0.97    6.79
  -3   8   0   -7.68    6.69
  -3   8   0   -2.92    7.59
  -3  -8   0    2.14    8.33
  -3  -9   0   -0.87   10.01
  -3   9   0   -3.33    8.04
   3   9   0    0.58    8.11
   3   9   0    1.70    8.23
   3  -9   0   -1.08    9.11
  -3   9   0    2.07    9.40
  -3  10   0    1.27   12.69
   3  10   0    7.51   11.31
  -3  10   0    3.08   10.42
   3  10   0    7.52   10.20
  -3 -10   0    9.33   12.42
   3 -10   0   -0.13   11.30
   3   0  -1 2340.86   58.31
  -3   0   1 2311.70   58.28
  -3   0  -1 2423.42   57.44
   3   0   1 2337.02   56.38
  -3   0  -1 2402.16   56.43
   3   0  -1 2395.85   58.17
  -3   0   1 2430.43   57.57
  -3   0  -1 2392.90   57.46
  -3   0  -1 2411.09   57.56
   3   0  -1 2358.53   56.68
   3   0   1 2378.91   57.40
   3   0   1 2414.84   57.59
   3   0  -1 2479.91   56.30
  -3   0   1 2390.51   58.14
   3   0   1 2404.81   58.30
   3   0  -1 2375.29   57.47
   3   0  -1 2450.19   56.48
   3   0   1 2350.16   57.22
  -3   0  -1 2272.47   58.24
   3  -1  -1  425.43   10.96
   3   1  -1  424.54   12.48
  -3   1  -1  394.14   12.31
   3  -1  -1  421.49   11.73
   3  -1   1  420.98   10.62
   3  -1   1  426.01   11.47
  -3  -1   1  401.18   12.26
  -3  -1   1  419.64   11.38
   3  -1   1  408.70   12.30
   3  -1  -1  423.80   11.25
  -3   1   1  438.52   11.35
  -3   1   1  430.54   11.74
   3  -1  -1  443.26   11.66
  -3   1   1  431.24   11.60
  -3  -1   1  439.76   11.92
  -3  -1  -1  420.32   11.58
   3   1   1  388.21   10.85
  -3   1  -1  426.92   11.07
   3   1   1  421.75   11.13
   3   1  -1  439.10   11.49
   3  -1   1  429.71   11.04
  -3  -1  -1  429.65   11.33
  -3   1   1  426.70   11.22
   3  -1  -1  430.32   11.31
  -3   1   1  416.94   10.92
   3   1   1  418.88   11.61
  -3   1  -1  424.94   11.81
   3   1  -1  425.26   11.80
   3   1  -1  432.00   11.88
   3   1   1  441.83   11.64
   3   1   1  409.81   11.64
  -3  -1   1  422.00   11.70
  -3   1  -1  424.73   10.54
  -3   1  -1  420.06   11.43
   3  -1   1  432.68   11.84
  -3  -1  -1  430.57   11.68
  -3  -1  -1  439.56   11.75
   3  -2  -1 7426.11  173.21
   3   2   1 7385.44  176.12
  -3  -2  -1 7306.02  174.01
   3  -2  -1 7260.06  175.98
  -3  -2  -1 7275.27  171.23
   3   2   1 7117.47  173.96
   3  -2   1 7248.24  176.97
  -3  -2   1 7205.27  171.79
  -3   2   1 7273.98  175.99
   3  -2   1 7446.41  171.91
   3  -2  -1 7361.28  171.19
   3  -2   1 7264.41  172.58
   3   2   1 7084.01  176.31
   3  -2   1 7198.67  174.27
   3  -2  -1 7462.30  176.15
   3   2  -1 7308.83  177.03
   3  -2  -1 7492.39  176.11
  -3   2  -1 7353.21  174.34
   3   2  -1 7317.95  177.04
   3  -2  -1 7328.71  173.11
  -3   2  -1 7315.92  175.28
   3  -2  -1 7254.41  173.91
   3   2  -1 7112.05  174.08
  -3   2  -1 7624.78  171.96
  -3  -2  -1 7544.50  176.06
   3  -3   1  403.08   12.76
  -3   3   1  435.28   12.16
   3  -3  -1  413.37   13.38
   3   3  -1  435.62   12.91
  -3   3  -1  438.15   13.52
   3   3   1  414.98   12.58
  -3  -3   1  389.87   12.73
   3  -3  -1  446.19   11.26
   3  -3   1  420.54   12.63
   3  -3  -1  408.91   12.95
   3   3   1  392.48   13.64
   3  -3  -1  419.82   11.18
  -3   3   1  414.46   13.15
   3   3   1  433.88   12.73
   3   3   1  430.83   12.26
   3   3  -1  398.73   14.18
  -3  -3   1  409.41   12.95
  -3  -3  -1  425.63   12.44
  -3   3   1  425.87   11.60
   3   3   1  428.27   11.83
  -3  -3  -1  443.76   12.94
   3   3   1  416.71   11.59
  -3  -3   1  429.72   12.35
   3  -3   1  407.11   13.01
   3   3  -1  412.22   11.80
   3  -3  -1  412.11   12.26
  -3   3  -1  436.90   12.86
   3  -3   1  437.06   13.72
  -3  -3   1  442.03   11.83
  -3  -3  -1  440.20   14.60
   3  -3  -1  409.60   11.60
  -3   3   1  449.14   13.49
  -3   4  -1  829.87   22.71
   3  -4   1  829.41   23.01
  -3   4  -1  793.41   22.87
  -3  -4  -1  839.54   23.99
   3   4  -1  801.33   21.74
   3  -4  -1  791.58   21.20
  -3  -4   1  849.13   24.43
   3  -4  -1  780.14   22.02
  -3   4   1  804.26   23.27
   3   4   1  836.40   22.67
  -3  -4  -1  794.53   21.88
   3   4   1  794.56   21.88
   3   4   1  770.06   21.07
   3   4   1  810.29   21.35
   3   4  -1  783.43   22.49
  -3  -4   1  826.16   21.69
   3   4  -1  790.17   22.61
  -3   4   1  810.35   21.19
  -3  -4   1  756.98   23.31
   3  -4  -1  813.48   20.28
  -3  -4  -1  830.17   22.01
  -3   4  -1  803.67   23.30
   3  -4  -1  841.87   23.33
  -3   4  -1  817.75   22.75
   3  -4   1  805.96   22.67
  -3  -4   1  810.60   21.70
   3  -5  -1   33.94    5.10
  -3  -5   1   25.22    3.53
  -3  -5   1   34.46    6.12
   3   5   1   42.70    5.17
   3   5   1   29.64    4.59
   3  -5   1   22.48    4.70
  -3   5   1   32.84    4.50
   3   5   1   26.53    3.48
  -3   5   1   28.16    3.38
  -3   5  -1   26.71    5.20
   3   5  -1   26.85    4.68
   3   5   1   20.48    3.88
   3   5  -1   26.03    4.24
   3  -5  -1   27.38    2.44
  -3   5   1   24.65    4.55
  -3  -5  -1   41.30    6.22
   3   5  -1   24.64    4.70
   3  -5  -1   24.85    3.62
   3   5  -1   30.48    4.35
  -3   5  -1   33.25    4.51
  -3   5  -1   31.76    4.81
  -3  -6  -1 2278.11   58.29
   3   6  -1 2326.09   59.87
  -3  -6   1 2400.86   57.86
   3  -6  -1 2356.85   61.55
   3   6   1 2329.56   58.77
   3   6   1 2362.77   60.09
  -3  -6  -1 2420.09   62.73
   3   6  -1 2409.85   59.49
   3  -6   1 2385.80   61.56
  -3   6   1 2312.41   58.30
  -3   6  -1 2335.85   61.04
  -3   6  -1 2292.68   59.82
   3   6   1 2255.98   58.89
  -3  -6   1 2245.88   62.52
   3  -6  -1 2228.97   56.50
  -3   6   1 2351.40   59.02
  -3   6   1 2293.02   60.93
   3   6  -1 2267.54   60.11
  -3   6  -1 2299.37   60.08
  -3   7   1  312.04   14.29
  -3  -7   1  303.54   18.40
  -3  -7  -1  298.74   12.24
  -3   7  -1  306.24   16.12
  -3   7   1  304.21   11.73
  -3   7  -1  303.99   15.27
   3  -7   1  321.56   15.81
   3   7  -1  305.19   14.30
   3   7   1  298.34   14.07
   3   7   1  314.62   12.22
  -3   7  -1  317.33   13.97
   3   7  -1  337.89   14.27
  -3   7   1  312.07   15.66
   3  -7  -1  328.25   15.30
  -3  -7  -1  303.05   16.23
   3   7   1  307.02   14.53
   3   7  -1  299.37   14.73
  -3  -8  -1  205.31   15.85
   3   8  -1  184.34   13.96
  -3   8   1  154.47   13.31
   3   8  -1  152.61   12.14
  -3   8  -1  178.22   13.34
  -3   8  -1  176.54   13.95
   3  -8   1  195.09   14.62
  -3   8   1  192.81   14.41
  -3   8  -1  202.19   13.15
   3  -8  -1  179.13   13.77
  -3  -8   1  216.55   16.26
   3   8   1  202.46   14.15
   3   8  -1  183.36   13.00
  -3   9   1    5.89    8.37
   3  -9   1    3.12    9.50
   3   9   1    5.05    8.65
   3   9  -1   -0.89    9.48
   3   9   1    3.95    8.68
  -3   9   1    7.13    9.47
   3  -9  -1    4.52    9.12
  -3  -9  -1   -2.88    9.57
  -3   9  -1   -2.07    8.61
  -3  -9   1    0.57   10.06
  -3   9  -1    8.24    9.96
   3   9  -1    4.58    8.39
  -3  10   1  358.61   23.56
  -3 -10   1  335.43   25.25
  -3  10  -1  367.84   22.86
  -3 -10  -1  345.35   24.43
   3  10  -1  376.76   23.14
   3 -10  -1  390.34   23.86
   3 -10   1  370.14   24.58
  -3  10   1  344.67   21.14
   3  10   1  343.87   22.01
   3  10   1  371.90   22.12
  -3  10  -1  363.00   24.76
  -3   0   2 3070.90   76.10
   3   0  -2 3131.25   74.35
   3   0   2 3157.64   77.12
   3   0  -2 3142.92   77.31
  -3   0  -2 3165.65   76.02
  -3   0  -2 3119.25   77.09
  -3   0  -2 3184.71   74.43
  -3   0  -2 3158.14   76.06
  -3   0   2 3257.57   75.02
   3   0  -2 3129.45   76.15
  -3   0  -2 3181.83   76.06
   3   0  -2 3167.96   77.11
  -3   0  -2 3193.69   76.12
   3   0  -2 3179.50   74.97
   3   0   2 3067.25   75.96
   3   0   2 3257.12   76.21
  -3   0   2 3230.79   77.42
  -3   0   2 2973.45   76.99
   3  -1  -2 1329.71   32.76
   3   1   2 1337.62   33.13
  -3   1   2 1314.76   31.34
  -3   1   2 1347.41   33.69
   3   1   2 1324.67   33.13
  -3  -1  -2 1355.76   32.81
  -3  -1  -2 1323.19   31.48
   3  -1  -2 1271.04   33.54
  -3   1  -2 1282.82   32.25
  -3   1  -2 1245.62   33.41
   3  -1   2 1312.70   32.39
   3  -1  -2 1318.74   33.04
   3   1   2 1275.45   31.51
   3   1  -2 1322.90   34.17
  -3  -1  -2 1330.20   33.07
   3  -1   2 1327.65   33.63
   3   1  -2 1339.74   33.22
  -3  -1   2 1295.19   32.96
   3  -1  -2 1315.06   32.87
   3  -1  -2 1351.44   32.71
   3   1  -2 1315.42   32.33
   3   1   2 1291.89   33.02
   3  -1   2 1286.83   32.16
   3  -1   2 1270.01   32.48
   3  -1  -2 1302.11   32.54
  -3  -1   2 1313.72   32.30
  -3  -1  -2 1329.59   33.14
   3   1  -2 1288.25   31.20
   3  -1   2 1304.13   33.50
  -3   1  -2 1276.94   32.31
  -3   1   2 1370.09   32.75
  -3   1  -2 1317.49   32.59
   3   1  -2 1328.59   33.63
  -3  -1   2 1354.45   34.24
  -3   1  -2 1318.51   33.60
   3  -1  -2 1309.62   31.41
  -3  -1  -2 1312.33   33.08
   3  -2  -2   10.22    2.70
  -3  -2  -2    3.55    2.09
   3   2   2    4.66    2.35
  -3  -2  -2    3.81    1.24
   3  -2  -2    4.70    1.49
  -3  -2   2    3.23    0.97
   3   2  -2    5.95    3.46
  -3   2  -2    6.40    2.03
   3   2  -2    4.61    2.48
   3  -2   2    4.39    1.55
  -3   2   2    7.18    1.22
  -3   2   2    4.08    1.27
   3  -2  -2    4.82    2.16
   3  -2   2    4.68    2.41
   3  -2   2   -0.41    1.65
  -3  -2  -2    4.42    2.02
  -3  -2   2    4.32    2.40
  -3   2   2    7.75    2.23
   3  -2   2    6.31    2.67
   3   2   2    5.06    1.45
  -3  -2   2    2.83    2.55
   3   2   2    3.61    2.30
  -3   2   2    3.79    1.87
   3  -2   2    9.67    3.46
  -3  -2  -2    7.75    2.69
   3   2  -2    4.62    2.12
  -3  -2   2    4.28    2.23
   3  -2  -2    6.04    2.54
  -3   2  -2   10.51    2.20
   3   2   2    4.61    1.39
   3  -2   2    5.94    2.38
  -3   2  -2    3.60    1.47
   3   2  -2    2.58    1.85
  -3  -2   2    5.93    1.90
  -3   2  -2    4.62    2.03
   3  -2  -2    3.86    1.70
   3  -2  -2    4.60    1.25
   3   2   2   10.27    2.35
   3  -3  -2  165.31    5.24
  -3  -3   2  166.33    8.32
  -3   3   2  161.08    7.46
   3   3   2  157.87    7.52
   3  -3   2  164.23    9.28
  -3   3  -2  179.15    7.63
  -3  -3  -2  176.76    7.15
   3   3  -2  190.30    6.20
   3   3   2  168.56    5.54
   3   3   2  167.94    6.17
   3  -3   2  158.96    6.97
   3   3   2  164.74    5.56
  -3   3  -2  176.67    5.48
   3  -3  -2  178.53    6.31
   3  -3  -2  161.69    6.21
   3  -3   2  168.26    8.31
   3   3   2  161.82    7.28
  -3   3   2  163.24    6.69
  -3  -3   2  163.74    6.51
  -3   3  -2  161.20    7.22
   3   3  -2  170.34    8.31
   3  -3  -2  165.40    7.58
  -3   3   2  170.81    5.14
   3   3  -2  182.32    7.52
  -3   3   2  168.81    5.91
   3  -3   2  166.13    5.54
   3   3  -2  168.60    7.32
  -3  -3  -2  180.54    6.39
  -3   3  -2  170.74    7.26
  -3  -3   2  176.75    5.76
  -3   4  -2 1655.50   41.46
  -3   4  -2 1613.89   41.32
   3   4  -2 1590.71   40.43
   3   4   2 1545.54   40.57
  -3   4   2 1489.68   38.77
   3  -4  -2 1609.26   41.56
  -3   4   2 1569.47   41.11
   3  -4  -2 1451.04   38.64
  -3   4  -2 1595.80   40.51
  -3  -4  -2 1580.61   39.88
  -3  -4   2 1542.25   38.74
  -3  -4  -2 1487.23   38.69
  -3  -4   2 1592.64   39.32
  -3  -4   2 1570.11   42.36
   3   4  -2 1617.06   41.27
   3   4   2 1559.88   38.85
  -3   4   2 1577.21   38.27
  -3   4  -2 1478.65   37.50
   3  -4   2 1569.46   40.83
   3   4   2 1536.88   38.56
   3  -4  -2 1493.86   38.24
   3   4   2 1480.30   39.89
  -3   4  -2 1582.21   37.43
   3   4  -2 1482.52   39.99
   3  -4  -2 1544.78   38.69
  -3   4   2 1570.92   38.68
  -3  -4  -2 1623.28   41.96
   3   4  -2 1559.21   39.11
   3   4   2 1531.11   38.54
  -3   5  -2 1642.10   43.11
   3  -5  -2 1640.63   43.78
   3  -5  -2 1483.47   39.65
  -3  -5   2 1491.90   40.78
   3   5  -2 1531.95   41.56
  -3   5   2 1581.80   39.64
  -3   5   2 1586.28   43.12
   3  -5  -2 1623.03   40.00
  -3  -5   2 1629.89   40.69
   3   5   2 1613.34   42.72
  -3   5  -2 1650.46   42.64
  -3   5   2 1558.83   40.10
   3   5   2 1625.12   40.14
   3   5  -2 1616.87   42.56
   3   5  -2 1584.10   42.93
  -3   5   2 1622.20   40.72
  -3   5  -2 1584.69   43.22
  -3  -5  -2 1654.74   44.29
  -3  -5   2 1633.42   44.59
   3   5   2 1588.30   39.96
  -3  -5  -2 1605.40   41.39
   3   5  -2 1685.92   43.09
   3   5   2 1596.42   40.84
   3  -5   2 1640.83   43.21
  -3   6  -2   17.53    6.13
  -3  -6  -2   18.68    4.58
   3   6  -2   26.08    5.65
   3  -6  -2   16.08    3.23
  -3   6   2   20.79    5.64
  -3   6   2   22.09    4.85
   3   6   2   16.20    4.65
   3   6   2   14.45    3.37
  -3  -6   2   21.08    4.20
   3   6  -2   26.32    5.28
  -3  -6  -2   16.83    5.59
   3  -6  -2   13.87    5.43
  -3   6   2   15.33    2.99
   3   6  -2   17.20    5.26
   3  -6   2   25.04    6.10
  -3   6  -2   11.25    5.16
  -3  -6   2   14.82    6.28
  -3   6  -2   16.81    5.31
   3   6   2   27.57    5.60
   3   7  -2    1.67    5.64
  -3   7   2    0.49    5.97
  -3   7   2    4.52    5.16
  -3   7  -2   -0.15    6.70
   3   7   2    6.24    5.88
  -3  -7  -2   -0.54    6.50
   3   7   2    3.79    5.31
  -3   7  -2    5.03    6.33
   3   7  -2    6.45    5.97
   3  -7   2    7.99    6.60
  -3  -7  -2    6.42    4.97
   3   7  -2    0.60    5.93
  -3   7  -2    4.11    5.19
   3   8   2  337.08   16.38
   3   8   2  354.83   18.03
   3   8  -2  350.06   17.25
  -3   8   2  322.78   16.15
  -3   8  -2  339.40   16.69
   3   8  -2  349.95   17.77
  -3   8  -2  340.21   19.13
  -3  -8  -2  359.40   19.33
   3   8  -2  359.29   17.90
  -3  -8   2  360.21   19.55
  -3   8  -2  364.06   18.83
   3  -8  -2  337.28   18.78
  -3   8   2  322.04   18.34
   3  -8   2  318.76   20.21
   3   9   2  486.87   21.72
   3   9   2  517.85   23.87
  -3   9   2  524.89   24.21
  -3   9  -2  485.36   23.97
   3   9  -2  544.09   22.73
  -3   9  -2  542.51   25.78
  -3   9  -2  529.57   22.69
  -3  -9   2  552.23   26.52
   3  -9   2  499.67   24.00
   3  -9  -2  509.57   23.99
   3   9  -2  483.58   23.08
  -3  -9  -2  490.56   25.46
  -3   9   2  534.84   21.85
  -3  10  -2    7.02   10.89
   3  10  -2    8.62   10.57
  -3 -10  -2    3.29   13.42
   3  10   2    1.65   10.79
  -3  10   2    2.31   11.18
  -3 -10   2   -0.32   11.76
   3 -10   2    6.34   12.07
   3 -10  -2    0.38   11.31
  -3  10  -2    3.30   13.11
   3   0  -3 1191.58   29.25
  -3   0  -3 1184.95   29.88
   3   0   3 1201.85   29.00
   3   0  -3 1182.56   30.46
   3   0  -3 1145.71   31.21
   3   0   3 1202.18   29.85
  -3   0   3 1145.79   28.77
  -3   0  -3 1169.96   30.36
  -3   0  -3 1142.08   30.46
   3   0   3 1198.60   30.57
   3   0   3 1219.07   31.31
   3   0  -3 1178.58   28.84
  -3   0   3 1176.81   29.22
  -3   0  -3 1235.17   30.60
  -3   0  -3 1175.17   28.93
   3   0  -3 1177.37   30.72
  -3   0   3 1147.88   31.12
   3   0   3 1130.82   30.27
  -3   0   3 1151.23   30.39
   3   0  -3 1168.06   30.52
  -3   1  -3  286.14    9.61
   3  -1   3  263.44    9.07
   3   1   3  279.58    9.54
  -3  -1  -3  291.06    9.59
   3  -1  -3  297.58    9.31
   3   1  -3  289.48    9.84
  -3  -1   3  270.68    8.80
   3  -1  -3  292.98    8.72
  -3   1  -3  288.31    8.90
  -3   1  -3  293.74    9.27
   3   1  -3  290.74    8.92
   3  -1   3  267.07    9.61
   3  -1  -3  265.87    9.50
   3   1  -3  267.66   10.60
  -3  -1   3  277.10    9.59
   3  -1  -3  280.37    9.62
  -3   1   3  278.65    8.92
   3  -1  -3  281.20    7.57
  -3  -1  -3  269.93    7.69
  -3   1   3  265.70    8.61
   3  -1  -3  290.43   10.27
   3  -1   3  290.89    9.79
  -3   1  -3  273.58    9.97
   3  -1  -3  274.16    7.60
  -3  -1   3  285.88    7.74
  -3  -1  -3  289.62    9.19
  -3  -1  -3  279.29    8.61
  -3   1  -3  274.66    8.75
   3  -1   3  274.01    8.47
   3   1   3  271.94    7.83
   3   1  -3  284.69    9.58
  -3   1   3  258.09    9.64
  -3  -1   3  283.87   10.27
  -3  -1  -3  273.08    9.10
  -3  -1  -3  285.25    9.84
   3  -1   3  297.39    9.64
   3   1  -3  279.69    7.86
   3   2   3    5.99    1.55
   3   2   3    5.48    1.46
  -3  -2   3    6.64    1.36
   3  -2  -3    9.69    2.91
  -3   2   3   11.30    3.27
   3  -2  -3   11.79    2.66
  -3  -2   3    9.17    1.67
   3  -2  -3    6.05    1.55
   3   2   3    6.34    3.11
   3  -2   3    6.68    2.40
  -3  -2  -3   10.64    1.74
   3  -2   3    6.54    2.99
  -3   2  -3   15.31    4.34
  -3  -2   3    3.98    3.09
  -3  -2   3    8.75    2.51
  -3   2   3    5.72    1.22
   3   2   3    9.16    2.60
   3   2   3    9.93    1.99
   3   2  -3   10.06    2.97
  -3  -2  -3   11.89    2.88
   3  -2   3    8.15    2.30
  -3  -2  -3    7.42    2.91
   3  -2   3    6.63    2.88
   3   2  -3    6.93    3.38
   3   2   3    8.45    3.26
   3  -2  -3    9.32    1.54
  -3   2  -3   14.32    2.58
  -3  -2   3    5.60    3.02
  -3   2  -3    4.44    2.57
   3  -2  -3   18.29    3.63
  -3   2  -3   12.71    3.11
   3   2  -3   12.97    4.93
  -3  -3   3  308.50    8.97
   3  -3  -3  281.06    8.23
   3  -3  -3  314.13   11.64
  -3   3  -3  312.81   11.18
   3   3   3  326.28   11.40
   3   3   3  302.11    8.75
  -3  -3  -3  329.40   11.74
   3  -3   3  287.57   10.57
  -3  -3  -3  318.24   10.90
  -3  -3   3  316.40    9.25
  -3   3   3  293.80    8.60
  -3   3   3  305.35   11.18
   3  -3   3  307.11    9.75
  -3   3   3  301.56   10.93
   3  -3   3  298.44   11.77
   3  -3  -3  328.46   10.50
  -3   3  -3  292.00   10.95
   3  -3  -3  303.99    8.94
  -3  -3   3  301.34   12.27
   3  -3   3  296.56   12.66
   3   3  -3  307.88   11.38
  -3   3  -3  321.41   11.57
   3   3  -3  326.14   11.13
   3   3   3  319.90    9.10
  -3   3  -3  319.34    9.67
   3   3  -3  289.84   11.40
  -3  -3  -3  308.48    8.53
   3   4   3  612.50   19.68
  -3   4   3  670.10   20.25
   3   4   3  633.96   16.37
   3  -4  -3  639.05   20.31
  -3  -4   3  645.89   18.33
   3   4  -3  675.27   19.94
   3  -4   3  658.95   20.74
  -3   4  -3  656.47   20.24
   3   4  -3  686.52   20.35
  -3  -4   3  641.58   21.09
  -3   4  -3  649.87   19.81
  -3  -4  -3  678.51   19.26
  -3   4  -3  623.68   17.34
  -3   4   3  639.90   17.11
  -3  -4  -3  580.55   18.03
  -3   4   3  618.33   18.83
  -3  -4   3  642.26   17.50
  -3   4  -3  618.79   19.67
  -3  -4  -3  659.47   20.56
   3   4   3  652.81   17.53
   3   4   3  657.73   16.41
   3  -4  -3  583.76   17.23
  -3  -4   3  624.53   18.09
  -3   4  -3  636.78   17.15
   3   5  -3  281.92   12.61
   3  -5  -3  262.16   12.58
   3  -5   3  288.99   12.60
  -3  -5   3  271.98   10.18
   3  -5  -3  268.00   10.27
  -3  -5  -3  281.65   11.33
  -3  -5  -3  266.66   12.52
   3   5  -3  293.75   11.28
  -3   5   3  276.05   12.67
   3   5  -3  275.56   12.21
  -3   5   3  278.31   11.58
   3   5   3  278.54   12.28
  -3   5  -3  263.00    8.64
  -3  -5  -3  271.25   12.88
  -3   5  -3  280.93   12.53
   3  -5   3  280.76   13.07
   3   5   3  285.12   10.47
  -3  -5   3  338.30   14.46
  -3   5  -3  283.23   12.49
  -3  -6   3   39.49    7.86
   3   6   3   34.14    5.18
   3   6  -3   28.27    6.24
  -3   6   3   41.48    5.37
   3   6  -3   43.27    6.45
   3  -6   3   39.23    6.92
  -3   6  -3   35.06    6.66
  -3  -6   3   42.49    4.80
  -3   6  -3   43.55    6.63
   3  -6  -3   47.38    4.99
   3   6   3   53.57    7.14
  -3  -6  -3   35.77    6.92
  -3   6   3   36.39    6.80
   3  -6  -3   29.49    6.24
   3  -6   3   41.85    7.89
  -3  -6  -3   35.69    5.62
   3   6  -3   49.96    7.21
   3   7   3   90.97    9.97
   3   7   3   76.77    7.70
   3   7  -3   96.51   10.11
   3   7  -3   89.01    9.24
   3  -7  -3   80.64    9.51
  -3   7   3   65.20    9.03
  -3   7  -3   96.42   10.49
  -3   7   3   86.48    7.86
  -3   7  -3   83.41    9.14
  -3  -7  -3   88.22   10.81
   3  -7   3   87.29   10.65
  -3  -7  -3   89.97    8.05
   3  -7   3   95.30   10.20
  -3  -7   3   94.66   11.31
   3   7  -3   95.75    9.99
  -3   8  -3  143.31   11.86
   3   8  -3  138.50   12.35
   3   8   3  162.52   11.46
  -3   8   3   99.36   11.41
   3  -8   3  153.08   14.23
  -3  -8  -3  130.61   13.59
  -3  -8   3  151.04   14.43
  -3   8  -3  135.37   12.83
   3   8  -3  139.58   13.00
   3  -8  -3  139.03   13.17
  -3   8   3  143.44   11.10
   3  -8   3  131.47   14.52
   3   8   3  177.08   13.87
  -3  -9   3   50.05   12.03
   3   9  -3   36.20   10.21
  -3   9   3   25.18    9.95
  -3   9  -3   25.10    9.89
  -3  -9  -3   28.65   11.29
   3  -9  -3   22.16   10.28
   3   9  -3   34.11   10.17
   3  -9   3   34.91   12.77
   3   9   3   14.43    9.96
   3  -9   3   16.32   10.75
  -3   9  -3   34.73   10.62
   3 -10   3    8.58   13.02
   3  10   3   -3.82   11.35
   3 -10   3    7.32   14.24
  -3  10  -3  -11.48   12.12
  -3 -10  -3   10.96   12.54
   3 -10  -3    1.95   13.25
  -3 -10   3    1.71   11.99
   3  10  -3    2.95   13.29
   3   0   4  740.40   19.34
  -3   0   4  758.58   19.78
  -3   0   4  691.70   20.60
  -3   0   4  723.17   21.67
  -3   0  -4  776.19   21.19
   3   0   4  730.78   20.97
  -3   0  -4  751.45   20.82
  -3   0   4  740.99   19.10
   3   0  -4  764.08   19.16
   3   0  -4  753.50   20.84
   3   0  -4  750.29   21.44
  -3   0  -4  749.25   19.21
   3   0  -4  747.65   19.85
   3   0   4  711.96   20.93
   3   0   4  748.20   20.32
   3  -1   4   42.57    4.09
   3   1   4   41.78    3.12
  -3  -1   4   42.97    3.91
  -3   1  -4   39.70    4.18
   3  -1   4   45.35    4.57
  -3   1   4   56.50    5.25
   3  -1  -4   53.54    3.99
   3  -1  -4   60.34    4.81
   3  -1  -4   45.13    2.73
   3  -1  -4   53.92    5.07
  -3   1   4   54.84    4.34
   3   1  -4   37.65    4.27
   3   1  -4   43.31    3.42
   3   1   4   44.85    4.64
  -3  -1  -4   46.17    4.11
  -3  -1   4   50.58    3.31
  -3   1   4   47.09    4.56
   3  -1  -4   45.32    2.60
  -3  -1  -4   47.96    4.79
  -3   1  -4   57.17    4.77
   3   1  -4   59.97    4.99
  -3   1  -4   70.98    5.07
  -3  -1  -4   48.35    2.84
   3   1  -4   51.38    4.04
  -3   1  -4   46.79    3.85
   3  -1   4   36.92    3.59
  -3  -1  -4   47.05    3.70
  -3  -1   4   48.97    5.36
  -3  -1  -4   43.25    4.18
   3   2   4  653.64   19.14
  -3   2  -4  620.76   18.36
  -3   2  -4  645.80   18.27
   3   2   4  627.52   17.32
   3   2   4  631.23   15.84
   3   2  -4  625.72   19.31
  -3  -2  -4  633.06   18.90
  -3  -2   4  632.13   20.15
   3   2  -4  624.46   18.11
  -3   2   4  641.62   18.57
   3  -2  -4  633.16   15.34
   3  -2  -4  632.14   18.83
   3   2  -4  662.83   19.02
   3   2  -4  603.81   17.04
  -3  -2  -4  620.35   17.07
   3  -2   4  624.02   18.01
   3  -2  -4  617.84   16.74
   3  -2   4  626.99   19.01
  -3   2  -4  657.75   18.31
  -3  -2   4  647.45   16.43
   3  -2  -4  638.27   17.08
   3  -2   4  591.89   18.26
  -3   2  -4  634.71   19.30
  -3  -2  -4  681.39   19.16
  -3   2   4  642.82   19.47
   3   2   4  600.72   15.81
   3   3   4   58.67    3.44
  -3  -3   4   65.27    4.08
   3  -3  -4   56.60    5.97
  -3   3   4   52.14    2.58
   3  -3  -4   55.44    3.21
   3  -3  -4   55.67    3.17
   3  -3   4   60.14    5.29
   3  -3  -4   54.92    2.98
   3   3   4   60.31    5.81
  -3  -3  -4   55.27    5.58
  -3  -3   4   54.88    3.75
  -3  -3  -4   57.71    3.39
  -3   3  -4   58.09    5.42
  -3   3  -4   49.44    5.48
  -3   3  -4   58.77    5.37
   3   3   4   53.74    3.94
   3  -3  -4   56.53    5.22
  -3  -3  -4   47.72    5.34
  -3   3  -4   55.35    6.02
   3   3  -4   62.70    6.09
  -3   3   4   53.35    5.42
   3   3  -4   54.05    5.36
  -3  -3   4   53.25    6.38
   3   3  -4   61.94    5.78
   3   3   4   51.71    3.36
   3  -3   4   71.41    6.30
   3  -3   4   65.72    5.56
   3  -4  -4  248.84   10.10
   3   4  -4  243.46   11.06
  -3   4   4  246.90   11.22
  -3   4  -4  230.61   11.03
  -3  -4  -4  235.51   11.32
   3  -4  -4  230.80   11.38
   3   4  -4  223.37   11.09
  -3   4   4  232.84    7.29
  -3  -4   4  237.31    8.76
   3   4   4  229.59   11.07
  -3  -4  -4  242.94   10.52
  -3   4  -4  229.89   11.16
   3   4  -4  234.57   10.27
   3  -4  -4  216.46    7.62
  -3   4  -4  225.14    9.72
  -3  -4   4  247.52   12.36
  -3  -4   4  242.20    8.72
   3   4   4  230.55    7.68
  -3   4  -4  226.40    8.97
   3  -4   4  219.31   11.33
   3   4   4  241.90    7.98
   3  -4   4  232.05   10.53
  -3  -5  -4  258.67   12.91
  -3  -5  -4  250.36   11.54
   3   5  -4  231.61   12.04
  -3   5   4  245.09    8.60
   3  -5   4  250.05   12.04
   3  -5   4  259.24   13.08
   3   5   4  242.64    9.29
   3   5  -4  219.36   11.87
   3   5   4  218.42   11.99
   3   5  -4  239.47   10.90
   3  -5  -4  242.05   12.45
  -3  -5   4  246.69   13.49
  -3   5  -4  235.45   12.45
  -3   5  -4  242.00    9.27
  -3  -5   4  246.13   10.20
   3  -5  -4  244.51   10.46
  -3   5   4  228.97   12.35
  -3   5  -4  228.74   12.23
   3   6  -4  313.19   15.17
   3  -6   4  338.62   15.90
  -3  -6  -4  310.55   13.46
  -3   6   4  280.27   10.96
   3   6   4  299.70   11.71
   3  -6  -4  299.20   12.43
  -3   6  -4  283.43   14.67
  -3  -6   4  333.82   13.33
   3   6  -4  291.39   12.74
   3   6  -4  271.87   14.63
  -3   6   4  280.94   14.86
  -3  -6  -4  273.54   15.13
  -3  -6   4  314.10   16.11
   3  -6   4  306.16   15.00
  -3   6  -4  279.67   15.05
   3  -7   4  222.65   14.69
  -3  -7   4  241.60   16.53
   3   7  -4  215.60   14.52
   3  -7   4  234.16   15.81
  -3   7  -4  223.81   15.48
   3   7  -4  190.29   14.40
  -3  -7  -4  237.07   12.82
   3  -7  -4  211.90   14.53
  -3   7   4  214.95   14.76
  -3  -7  -4  198.08   14.74
  -3   7  -4  230.33   15.02
   3   7   4  209.38   14.46
  -3  -8  -4   97.26   12.62
   3  -8  -4  102.23   12.40
   3   8  -4   94.34   11.31
   3   8  -4   84.02   11.21
  -3  -8   4  141.67   14.19
  -3   8   4   89.23   11.98
   3  -8   4   93.20   13.06
  -3   8  -4   83.55   11.60
   3  -8   4   85.85   11.18
  -3   8  -4   87.90   10.94
   3   8   4   93.06   11.94
  -3  -9   4  287.47   20.77
  -3   9  -4  274.00   20.23
   3  -9  -4  254.00   19.57
  -3   9  -4  269.65   19.17
   3  -9   4  320.35   21.16
   3   9  -4  236.11   17.30
   3  -9   4  272.18   20.29
  -3  -9  -4  223.12   18.43
   3   9   4  269.73   19.65
  -3   9   4  178.84   16.18
   3   9  -4  216.83   17.26
   3   0   5  622.53   17.69
   3   0  -5  626.17   18.69
   3   0   5  622.80   18.98
  -3   0   5  648.81   19.93
   3   0  -5  599.85   19.35
  -3   0   5  599.30   16.64
   3   0   5  670.20   18.51
  -3   0  -5  648.60   16.84
  -3   0  -5  610.53   18.59
  -3   0   5  628.41   17.65
  -3   0  -5  606.76   18.99
   3   0  -5  580.88   17.79
  -3   0  -5  598.16   18.89
   3   0  -5  635.08   16.73
  -3   1   5   95.70    6.07
  -3   1   5  105.95    7.30
  -3  -1  -5   91.71    4.19
   3   1   5  111.06    7.17
  -3  -1  -5  108.45    7.19
   3  -1   5  110.56    6.98
   3  -1   5  108.31    6.12
  -3  -1   5   97.36    5.24
  -3   1  -5   99.45    6.96
  -3   1  -5   99.85    6.36
   3  -1  -5  109.68    6.15
  -3   1   5   69.02    5.86
   3   1  -5   92.20    5.78
  -3  -1   5   99.65    7.68
  -3  -1  -5   99.08    6.69
   3   1  -5  113.59    7.50
  -3  -1  -5   94.24    6.22
   3  -1  -5   97.17    3.94
  -3   1  -5  100.83    7.66
   3   1  -5  101.83    6.85
  -3   1  -5   94.77    6.85
   3  -1  -5  101.67    4.15
   3  -1  -5  119.28    7.57
   3   1   5   97.01    4.67
  -3  -2   5 2987.79   71.43
  -3  -2  -5 2961.65   74.87
  -3   2  -5 2976.40   72.50
   3   2   5 2878.96   73.28
   3  -2   5 2916.22   75.05
   3   2  -5 3020.97   75.73
   3  -2  -5 2927.30   73.11
   3   2   5 2895.79   69.42
  -3   2  -5 2840.41   74.07
   3   2   5 2959.96   74.32
  -3   2   5 3044.75   73.80
  -3   2   5 3108.13   74.37
   3  -2  -5 3099.44   74.58
  -3  -2  -5 2950.64   73.08
  -3  -2   5 3018.77   76.31
   3   2  -5 2954.81   72.45
   3   2   5 2851.58   69.43
  -3   2   5 3008.64   75.63
  -3   2  -5 3003.25   73.61
  -3  -2  -5 2963.43   74.48
   3   2  -5 2971.18   74.35
   3   2  -5 2807.01   71.89
   3  -2   5 2837.58   73.78
  -3   2  -5 2958.72   75.62
   3   3   5  295.32    9.97
   3  -3  -5  281.43    8.94
  -3  -3  -5  304.47   12.45
   3   3  -5  306.68   12.35
   3   3   5  308.28   12.74
   3  -3  -5  295.41    9.15
  -3  -3   5  293.74   10.22
   3  -3   5  263.92   11.47
   3   3  -5  302.59   12.92
   3  -3  -5  298.01   12.18
  -3   3   5  309.56   12.50
   3  -3   5  310.38   12.47
  -3  -3   5  312.31    9.61
  -3   3  -5  299.07   11.46
   3  -3  -5  300.43   12.99
  -3   3  -5  281.02   11.85
  -3  -3  -5  290.62   12.66
  -3   3  -5  302.01   12.90
  -3  -3   5  299.51   13.80
  -3  -3  -5  289.62    9.22
   3   3  -5  298.49   11.93
   3  -4  -5  115.19    8.28
   3   4  -5  127.16    9.11
   3   4  -5  119.40    9.05
  -3  -4   5  124.49    6.41
   3   4   5  121.34    9.25
   3  -4   5  132.32    9.32
  -3   4  -5  131.57    9.79
  -3   4   5  120.20    9.15
  -3   4  -5  113.87    8.62
  -3  -4  -5  127.41    9.30
   3  -4   5  139.08    9.07
   3  -4  -5  107.56    9.04
  -3   4  -5  136.60    8.04
  -3  -4  -5  124.75    9.41
   3   4   5  120.24    4.98
  -3  -4   5  112.67    9.80
   3   4  -5  126.18    9.55
  -3   5  -5    7.35    5.69
  -3  -5  -5    6.43    4.91
  -3   5   5    4.39    5.54
  -3  -5   5   12.43    4.33
   3  -5   5    5.89    5.41
  -3   5  -5    9.15    5.55
  -3  -5  -5    6.91    5.60
   3  -5  -5   12.46    4.88
   3   5  -5    2.52    5.16
   3   5  -5    4.62    5.05
   3  -5   5   10.06    5.94
   3   5  -5    2.62    5.55
  -3  -5   5   11.12    6.28
   3  -5  -5   12.06    6.01
   3   5   5    6.73    5.18
  -3   5  -5    7.87    4.44
  -3   6  -5  851.05   29.31
   3  -6  -5  858.66   29.81
   3   6  -5  880.04   28.91
   3  -6   5  843.24   28.30
  -3  -6  -5  921.39   27.94
  -3   6   5  905.64   29.44
  -3   6  -5  894.44   29.04
   3   6  -5  913.72   26.93
   3  -6  -5  899.88   27.00
  -3  -6  -5  870.63   29.74
   3  -6   5  850.87   28.63
   3   6   5  864.29   29.00
   3   6  -5  900.00   29.71
   3   7  -5  144.35   12.48
   3  -7   5  205.46   14.57
   3   7   5  214.38   15.55
  -3  -7   5  150.93   14.39
  -3   7  -5  161.64   13.41
   3  -7   5  194.38   13.87
   3   7  -5  189.46   14.61
   3  -7  -5  169.37   14.20
  -3  -7  -5  183.00   13.00
  -3   7  -5  162.20   13.13
  -3  -7  -5  206.94   15.44
  -3   7   5  171.48   13.87
  -3   8   5    4.33    9.07
   3  -8   5   11.09   10.41
   3   8  -5    4.30    9.19
   3   8   5    0.11    8.90
   3  -8  -5    5.94    8.86
  -3  -8  -5    7.19    9.75
  -3   8  -5    0.52    9.22
  -3   8  -5   11.38    9.23
  -3  -8   5    8.05   10.12
   3  -8   5    8.11    9.77
   3   8  -5    5.39    8.32
  -3   9  -5   -0.03   10.79
   3   9  -5   10.67   11.72
  -3  -9  -5    2.60   11.40
  -3   9  -5   -2.62   11.92
  -3   9   5    2.72   11.19
   3   9  -5   -4.08   10.41
  -3  -9   5   -2.34   11.50
   3  -9  -5    4.76   11.07
   3   9   5    1.95   10.91
   3   0  -6   42.05    5.50
   3   0  -6   34.87    3.78
  -3   0   6   38.13    6.02
  -3   0  -6   31.67    4.84
   3   0  -6   43.25    6.21
   3   0   6   30.08    4.99
   3   0   6   37.20    4.94
  -3   0  -6   40.44    3.92
  -3   0   6   42.07    5.38
   3   0   6   36.18    4.43
  -3   0  -6   37.10    5.25
  -3   0   6   36.49    4.52
  -3  -1   6  398.11   13.61
  -3  -1  -6  420.75   13.73
   3   1  -6  397.74   15.29
   3   1   6  390.06   14.63
   3  -1  -6  402.44   13.76
  -3  -1  -6  381.41   14.36
  -3   1   6  397.32   13.74
   3   1  -6  361.88   13.69
  -3  -1  -6  383.50   14.85
   3  -1   6  392.06   13.83
  -3  -1   6  386.72   15.61
  -3  -1  -6  388.17   11.01
   3  -1  -6  397.51   15.39
   3   1  -6  393.70   12.98
   3   1   6  410.43   14.12
  -3   1  -6  387.47   14.61
  -3   1  -6  395.28   12.95
   3  -1  -6  388.36   10.85
  -3   1  -6  392.86   14.64
  -3   1   6  360.73   15.01
   3   1  -6  381.82   14.57
   3  -1   6  416.29   14.50
  -3   2  -6  543.31   18.28
  -3   2   6  522.22   17.83
  -3   2  -6  527.08   17.23
   3  -2  -6  543.70   17.95
   3   2  -6  600.42   19.32
  -3  -2  -6  563.17   18.64
  -3  -2  -6  558.41   16.45
  -3  -2  -6  549.84   18.93
  -3   2   6  545.13   19.20
  -3   2  -6  536.41   18.84
   3   2  -6  533.26   17.27
   3   2  -6  560.61   18.91
   3  -2   6  542.77   18.22
   3   2   6  517.42   18.45
  -3  -2   6  541.25   15.85
   3  -2  -6  524.18   18.72
  -3  -2   6  531.78   19.90
   3  -2   6  533.47   17.65
  -3  -3   6  539.20   15.70
  -3   3   6  516.60   18.47
   3  -3  -6  517.49   15.45
  -3   3  -6  541.60   18.07
  -3   3  -6  530.13   19.62
   3   3   6  534.78   19.16
   3   3  -6  569.95   19.03
  -3  -3  -6  553.68   15.64
   3   3  -6  485.86   19.12
  -3  -3  -6  537.86   19.30
  -3   3  -6  525.04   18.03
  -3  -3   6  542.72   20.40
   3  -3  -6  575.04   19.19
   3  -3   6  538.62   18.19
   3   3  -6  561.09   18.37
   3  -3   6  546.17   18.70
   3  -3  -6  532.24   19.71
  -3  -3  -6  524.33   19.18
   3  -4   6  152.55   10.22
   3   4  -6  138.33   10.18
   3  -4  -6  139.85    9.98
  -3   4   6  129.93   10.26
  -3   4  -6  127.20    9.29
  -3   4  -6  135.24   10.01
   3   4  -6  118.40    9.81
   3   4   6  136.99   10.65
  -3   4  -6  107.34    9.75
  -3  -4   6  122.83    7.76
  -3  -4  -6  160.44   11.05
   3   4  -6  146.37   10.46
   3  -4   6  141.63   10.11
   3  -4  -6  123.90   10.39
  -3  -4   6  121.35   11.10
  -3  -4  -6  111.52    9.81
   3  -5   6  240.44   13.94
  -3   5  -6  238.18   12.02
   3  -5  -6  232.34   13.18
   3   5  -6  230.24   13.76
   3  -5   6  235.62   13.61
   3   5  -6  233.52   14.51
  -3   5   6  236.90   14.20
   3  -5  -6  242.14   14.53
  -3  -5  -6  264.56   13.95
  -3   5  -6  223.66   13.83
   3   5  -6  235.26   13.28
  -3   5  -6  235.80   14.35
   3   5   6  248.20   14.35
  -3  -5  -6  252.01   14.61
  -3  -5   6  241.47   15.51
   3  -6   6  309.21   16.15
  -3  -6  -6  321.83   16.13
   3  -6   6  301.83   16.38
  -3  -6  -6  286.29   17.59
   3   6   6  288.65   17.22
  -3   6   6  314.57   17.52
   3   6  -6  296.23   17.52
   3  -6  -6  347.39   15.90
  -3   6  -6  306.32   17.66
   3   6  -6  311.50   17.18
  -3   6  -6  283.12   17.03
   3  -6  -6  318.90   17.61
  -3  -6   6  308.97   18.02
   3   6  -6  324.71   15.55
  -3   7  -6  209.53   15.88
   3   7  -6  226.53   16.92
   3  -7  -6  220.18   17.37
   3  -7   6  213.91   16.12
   3   7  -6  196.24   15.13
  -3  -7   6  252.24   18.52
   3   7   6  220.67   16.40
  -3   7   6  226.94   17.11
  -3  -7  -6  201.11   15.02
  -3  -7  -6  221.63   17.11
  -3   7  -6  184.52   14.80
  -3   8  -6   10.22   10.49
   3   8  -6    8.33    9.69
   3  -8  -6    9.01   10.14
   3   8   6    9.22   10.60
  -3   8   6    7.82    9.72
   3   8  -6    8.23   10.46
  -3  -8  -6   12.41   10.49
  -3  -8   6    3.19   10.44
  -3   8  -6   19.76   10.15
   3   0  -7 2764.88   70.06
   3   0  -7 2656.21   65.44
  -3   0  -7 2690.23   69.97
  -3   0   7 2667.07   67.73
   3   0   7 2777.23   69.62
  -3   0  -7 2673.76   69.82
   3   0  -7 2634.05   70.39
   3   0   7 2697.30   69.42
  -3   0  -7 2714.47   66.03
  -3   0   7 2695.54   71.17
   3   1  -7  105.76    7.52
   3  -1   7   87.88    7.59
  -3   1   7   98.96    7.65
  -3  -1  -7  106.55    8.65
   3  -1  -7   91.74    7.40
  -3  -1   7  102.78    7.45
   3   1  -7  102.75    8.63
  -3   1   7   79.76    8.33
  -3  -1  -7  110.73    7.90
   3   1   7  111.73    8.84
   3   1  -7  110.98    9.65
  -3  -1   7  100.43    9.27
   3  -1   7  107.26    8.56
  -3   1  -7  100.20    6.98
  -3   1  -7  103.56    8.56
  -3   1  -7   87.97    8.36
  -3  -1  -7  106.40    9.19
   3  -1  -7  102.44    9.48
  -3   2   7  559.29   19.34
  -3  -2   7  546.20   17.05
   3   2  -7  564.04   20.43
   3  -2  -7  531.86   20.75
  -3   2  -7  562.65   19.81
   3  -2  -7  583.05   20.78
  -3  -2  -7  563.69   19.95
   3  -2   7  554.09   19.41
  -3  -2  -7  549.91   17.62
   3   2  -7  544.26   18.27
   3  -2  -7  566.33   17.93
   3   2   7  520.41   19.81
  -3   2  -7  568.93   20.38
  -3  -2  -7  565.73   20.39
   3  -2   7  563.72   19.07
  -3   2  -7  562.42   18.37
   3   2  -7  575.87   20.64
  -3  -2   7  584.46   21.46
  -3  -3   7   75.92    9.48
   3  -3  -7   73.93    8.37
   3   3  -7   89.24    8.36
   3  -3  -7   97.53   10.10
   3  -3   7   85.55    8.32
  -3  -3  -7  108.37   12.24
  -3  -3  -7   71.80    8.58
  -3   3  -7   88.41    8.21
   3   3  -7   75.33    8.25
   3  -3   7   88.43    8.37
  -3   3  -7   96.69    8.80
  -3  -3   7   92.20    8.95
  -3   3   7   78.42    8.06
  -3   3  -7   76.03   11.43
   3   4  -7 1992.94   57.02
   3   4   7 2104.22   56.36
   3  -4   7 1984.52   54.31
  -3  -4  -7 2036.20   55.62
   3   4  -7 2036.81   54.53
   3   4  -7 2133.55   55.15
   3  -4   7 2024.83   54.87
  -3  -4  -7 2094.05   56.71
   3  -4  -7 2012.99   57.14
  -3   4  -7 2025.60   57.06
  -3  -4   7 1993.21   57.69
  -3   4   7 1995.25   55.56
  -3   4  -7 2011.60   53.97
  -3   4  -7 2021.37   54.25
  -3   5   7  277.39   16.93
   3  -5   7  279.81   15.28
  -3  -5  -7  281.58   15.76
   3   5  -7  278.42   17.10
   3  -5  -7  310.36   17.38
   3  -5   7  311.30   15.91
   3   5  -7  283.07   15.93
  -3   5  -7  274.61   15.76
  -3   5  -7  278.24   14.76
   3   5  -7  287.85   15.49
  -3  -5  -7  267.71   16.38
   3  -5  -7  300.37   15.57
  -3  -5   7  269.74   17.40
   3   5   7  295.73   16.62
  -3   5  -7  284.52   16.87
   3  -6   7  239.09   15.82
   3  -6  -7  214.60   15.30
   3   6  -7  228.14   16.69
  -3  -6   7  202.34   16.28
   3   6  -7  177.97   14.23
   3   6  -7  232.15   15.10
  -3   6  -7  231.77   16.67
  -3   6  -7  195.31   14.50
  -3   6   7  172.87   14.46
  -3  -6  -7  231.57   15.68
  -3  -6  -7  182.03   14.63
   3  -6  -7  216.24   16.28
  -3  -7  -7    2.70    8.92
  -3  -7   7    5.61   10.16
  -3   7   7    1.60    9.30
   3   7   7    2.78    9.72
  -3   7  -7   -1.30    9.49
   3   7  -7    1.01    9.04
   3  -7  -7    0.73    8.97
  -3   7  -7    2.14    9.26
   3  -7  -7   -2.04    9.75
   3   7  -7   -0.08    8.89
  -3  -7  -7    0.42    9.10
  -3  -8   7  569.83   28.95
  -3   8   7  550.57   29.27
   3  -8  -7  603.84   30.83
   3   8  -7  537.62   30.51
   3   8   7  513.40   30.33
  -3  -8  -7  481.25   40.51
  -3   8  -7  599.16   30.52
   3   0   8   55.90    7.87
  -3   0  -8   86.22    9.64
   3   0  -8   66.52    8.76
  -3   0   8   81.46    7.69
  -3   0  -8   79.16    8.70
   3   0  -8   58.38    7.88
  -3   0  -8   68.29    7.97
  -3  -1   8    9.33   11.05
  -3   1  -8    4.76    5.79
   3   1  -8    1.49    6.21
   3   1   8    6.38    5.64
   3  -1  -8    3.31    5.17
   3  -1   8   10.44    5.88
   3  -1   8    5.38    5.49
  -3  -1  -8   10.99    6.34
  -3  -1  -8    7.92    6.39
  -3   1   8    5.04    5.24
  -3  -1  -8    4.95    5.17
  -3  -1   8   11.23    5.16
  -3   1  -8    4.28    4.74
   3   1  -8    7.46    4.77
   3   1  -8    6.53    5.98
   3  -1  -8    8.65    6.39
  -3   1   8    2.92    6.26
  -3   1  -8    3.67    6.18
  -3  -2   8  118.16   18.52
   3  -2  -8  106.40    8.34
   3   2  -8   97.35    9.91
   3   2  -8   80.92    9.55
  -3   2  -8   84.11    9.48
  -3  -2  -8   79.25    9.27
  -3  -2  -8  112.17   10.36
   3  -2  -8   84.01    9.90
   3  -2   8   81.30    8.52
   3   2   8   91.29    9.67
  -3   2   8   85.46    8.95
  -3   2  -8   90.68    9.79
   3   2  -8   99.47    8.66
   3  -2  -8   79.29    9.60
  -3  -2   8   88.89   11.02
  -3  -2  -8  100.31    8.13
   3  -2   8   79.76    8.75
  -3   2  -8   72.85    8.15
   3  -3   8  105.23    9.79
   3  -3   8  100.98    9.79
  -3   3  -8   79.82    8.88
   3  -3  -8   84.89   10.31
   3   3  -8  102.05   10.48
   3  -3  -8  108.71   11.09
  -3   3  -8   67.31    9.30
  -3   3  -8  111.89   16.96
  -3  -3  -8   90.48   10.30
  -3   3   8   94.40    9.65
   3   3  -8   84.49    9.04
   3   3  -8   84.35   10.07
   3   3   8   98.31   10.61
  -3  -3  -8  100.31   10.89
  -3  -3   8  105.70   11.81
  -3  -4   8   26.81    9.40
   3  -4   8   24.82    7.47
   3   4   8   29.15    8.66
   3   4  -8   19.86    8.38
  -3   4  -8   39.68    9.35
  -3   4  -8   22.90    7.65
  -3  -4  -8   22.73    8.23
   3  -4  -8   26.24    8.40
   3   4  -8   31.65    8.69
   3   4  -8   31.45    8.06
  -3  -4  -8   34.09    9.07
   3  -4   8   31.04    7.96
  -3   4   8   39.82    8.79
   3  -4  -8   23.85    8.39
   3  -5   8   77.70   10.78
  -3  -5  -8   71.96   11.53
   3  -5  -8   82.19   12.28
  -3   5  -8   77.97   11.66
  -3   5   8   86.84   11.19
   3   5  -8   76.70   10.61
   3   5  -8  118.21   12.18
   3   5  -8   80.08   11.26
  -3  -5  -8   50.32    9.83
   3   5   8   91.74   11.55
   3  -5  -8   65.04   10.22
  -3   5  -8   74.89   10.57
  -3   5  -8   84.22   11.90
  -3  -5   8   72.71   11.97
  -3  -6  -8   23.22   10.81
  -3   6  -8   20.03   10.47
   3   6  -8   22.28    9.91
  -3  -6   8   25.25   10.90
  -3   6  -8   20.36    9.89
   3   6  -8   15.24    9.40
   3   6   8   18.09    9.77
  -3  -6  -8   28.61    9.80
   3  -6  -8   22.42   10.68
  -3   6   8   25.49   10.47
   3   6  -8   20.03    9.77
   3  -6  -8   29.80    9.85
   3   7  -8  142.65   22.03
  -3  -7   8  136.87   16.88
  -3   7  -8  102.76   16.99
  -3  -7  -8  125.09   14.12
   3   7  -8   98.38   13.70
  -3   7   8  156.02   17.05
  -3   7  -8   99.90   14.31
  -3  -7  -8   86.86   13.68
   3  -7  -8  113.18   13.97
  -3   0  -9  516.23   23.33
   3   0   9  549.30   21.14
   3   0  -9  530.24   22.29
  -3   0  -9  484.62   21.68
   3   0  -9  532.98   21.12
  -3   0  -9  523.77   21.53
  -3   0   9  511.69   19.59
  -3   0   9  522.32   22.25
   3  -1   9   47.40    8.40
   3  -1  -9   36.62    9.07
   3   1   9   45.27    8.67
  -3   1  -9   45.73    9.35
  -3   1   9   44.25    7.68
  -3  -1   9   23.24    8.48
  -3  -1  -9   43.43    8.03
   3   1  -9   29.13    8.35
  -3  -1  -9   40.78    9.54
   3   1  -9   31.39    8.51
  -3   1  -9   42.07    8.61
  -3  -1  -9   27.49    8.15
   3  -1  -9   45.02    8.17
   3  -1   9   37.89    8.11
  -3   1   9   32.01    8.94
   3  -2  -9   52.65   10.45
  -3  -2  -9   70.40   10.78
  -3   2   9   55.31    8.81
   3   2   9   46.77    9.28
  -3  -2   9   61.56   10.49
  -3   2  -9   55.69    9.75
  -3   2  -9   46.35    9.16
  -3  -2  -9   56.34    9.72
   3  -2   9   54.87    9.00
   3   2  -9   39.65    9.30
   3  -2  -9   35.47    9.42
   3   2  -9   69.38   10.35
   3  -2   9   52.03   10.56
  -3   3   9   76.19   10.20
   3   3  -9   57.79    9.10
   3  -3  -9   35.58    9.63
  -3  -3   9   58.18   11.17
   3  -3  -9   56.12   10.44
  -3   3  -9   63.30   10.13
   3  -3   9   49.44   14.60
   3   3  -9   52.98    9.75
   3   3  -9   81.97   11.19
  -3   3  -9   58.20   10.31
   3   3   9   72.75   10.85
  -3  -3  -9   61.84   10.82
  -3  -3  -9   47.80    9.88
   3   4   9  446.03   21.74
   3   4  -9  438.63   22.37
   3   4  -9  419.38   20.22
   3  -4  -9  452.46   22.58
   3  -4  -9  417.10   21.53
  -3   4  -9  442.19   22.15
  -3   4  -9  389.42   20.65
  -3  -4   9  430.14   23.06
  -3   4   9  445.43   21.74
  -3  -4  -9  436.25   21.70
  -3  -4  -9  438.41   22.28
  -3   4  -9  435.36   20.55
   3   4  -9  420.73   21.05
  -3  -5   9   49.14   12.51
   3  -5  -9   82.34   12.53
   3   5  -9   54.36   11.48
   3   5  -9   64.80   11.39
  -3  -5  -9   87.94   12.92
  -3   5  -9   66.84   11.35
  -3   5  -9  101.69   16.45
  -3   5   9   76.70   12.68
   3  -5  -9   68.01   13.10
  -3   5  -9   73.51   12.43
   3   5  -9   80.09   12.49
   3   5   9   76.06   11.65
  -3  -5  -9   59.82   12.10
  -3  -6  -9   21.53   11.09
   3   6  -9   23.09   11.07
   3   6  -9   29.15   17.33
  -3   6  -9   36.40   16.27
  -3  -6  -9   41.60   12.68
  -3   6   9   20.96   11.86
  -3   6  -9   26.64   11.32
  -3  -6   9   33.57   12.49
   3  -6  -9   18.37   11.60
  -3   0 -10   12.29    8.66
  -3   0 -10   10.60    9.51
   3   0 -10   23.98   10.06
   3   0  10   15.65    8.56
   3   0 -10   16.41    9.20
  -3   0  10   13.46    9.53
  -3   0 -10   11.14    9.41
  -3  -1 -10   62.83   12.03
  -3   1 -10   59.73   10.48
   3   1 -10   75.32   11.19
   3  -1  10   54.91    9.80
  -3   1  10   63.79   11.47
   3   1  10   59.58   10.64
  -3  -1  10   47.68   11.00
  -3  -1 -10   82.20   11.79
   3   1 -10   68.23   11.56
  -3   1  10   63.90    9.83
  -3   1 -10   66.23   11.16
   3  -1 -10   57.74   10.90
  -3   2 -10  395.13   21.49
  -3  -2 -10  390.18   21.41
   3  -2  10  408.82   20.16
   3   2 -10  458.34   21.73
  -3   2  10  417.63   20.48
  -3  -2 -10  367.03   21.37
   3   2 -10  418.81   21.95
   3   2  10  403.44   21.54
  -3  -2  10  442.66   23.30
   3  -2 -10  407.45   22.37
   3  -2 -10  438.86   23.21
  -3   2 -10  402.67   21.20
   3   3  10  275.03   19.44
  -3   3  10  265.43   18.48
   3   3 -10  276.50   19.24
  -3   3 -10  279.70   18.69
  -3  -3 -10  270.61   19.81
  -3  -3  10  314.32   21.28
  -3   3 -10  291.81   19.77
   3   3 -10  324.60   20.08
   3  -3 -10  256.07   19.43
  -3  -3 -10  266.61   19.80
   3  -3 -10  311.08   20.64
   3  -4 -10    5.67   11.94
   3  -4 -10    8.16   10.90
  -3   4 -10    6.99   10.38
  -3  -4 -10    1.41   11.05
  -3   4  10    9.56   10.88
   3   4 -10    8.53   10.62
  -3   4 -10   -1.65   10.38
   3   4  10    4.35   10.01
   3   4 -10    6.72   10.45
  -3  -4 -10    2.34    9.67
  -3  -4  10    5.97   11.65
  -3   5 -10   -1.46   11.25
  -3   5  10   -3.13   11.41
  -3   5 -10    0.20   11.42
   3  -5 -10   -4.78   12.02
   3   5  10   -0.29   11.38
   3   5 -10    5.00   11.40
   3   5 -10    4.05   11.61
   3  -5 -10    2.11   11.53
  -3  -5  10   -2.06   12.30
   3   5 -10    4.66   11.04
  -3  -5 -10    4.71   11.40
   3   0 -11  158.42   16.34
  -3   0 -11  245.80   19.25
  -3   0  11  233.34   18.59
  -3   0 -11  262.85   19.91
   3   0  11  217.75   16.89
  -3  -1  11   54.77   12.86
   3  -1 -11   52.15   13.51
  -3  -1 -11   50.30   17.61
  -3  -1 -11   49.87   12.92
  -3   1 -11   67.56   13.40
   3   1 -11   54.34   12.04
   3   1  11   52.71   12.34
   3  -1  11   61.12   11.99
  -3   1 -11   60.55   12.54
   3   1 -11   35.72   11.72
   3   2 -11    5.10   11.09
  -3   2 -11    5.84   11.59
  -3  -2 -11    0.40   11.89
  -3  -2 -11    0.51   11.14
   3  -2 -11    5.02   11.59
   3  -2 -11    3.71   11.26
  -3   2 -11    1.66   11.05
   3   2  11   10.62   11.24
  -3   2  11    0.84   10.43
   3   2 -11    3.69   11.96
  -3  -2  11   17.93   12.11
   3   3 -11   33.62   20.39
   4   0   0 5028.03  120.75
   4  -1   0 1806.35   44.28
  -4  -1   0 1871.27   45.55
  -4  -1   0 1845.74   45.82
   4   1   0 1812.93   45.81
  -4  -1   0 1857.48   44.40
   4  -1   0 1825.41   45.56
  -4   1   0 1827.13   45.38
  -4   1   0 1832.08   44.28
   4  -1   0 1857.41   44.83
  -4  -1   0 1745.27   44.35
  -4   1   0 1850.40   44.79
   4  -1   0 1903.98   45.52
   4   1   0 1813.68   45.28
  -4   1   0 1862.72   44.67
  -4   1   0 1828.34   45.57
   4   1   0 1808.69   45.54
   4  -1   0 1792.91   44.55
  -4  -1   0 1881.97   45.38
   4   1   0 1842.84   44.43
   4   1   0 1913.56   44.43
   4  -2   0 8472.37  200.85
  -4   2   0 8077.69  199.46
   4  -2   0 8264.88  196.59
  -4  -2   0 8518.97  200.88
  -4   2   0 8436.02  198.04
   4  -2   0 8310.34  195.11
  -4   2   0 8543.35  195.16
  -4  -2   0 8435.85  196.74
   4   2   0 8123.04  200.72
   4   2   0 8118.80  197.93
   4   3   0 1184.28   29.09
   4  -3   0 1167.71   29.74
   4  -3   0 1148.17   29.53
   4   3   0 1145.60   29.61
  -4   3   0 1113.34   29.56
  -4   3   0 1161.44   29.48
   4   3   0 1058.47   30.84
   4   3   0 1110.87   29.23
   4  -3   0 1101.99   30.35
   4  -3   0 1110.43   29.26
   4   3   0 1184.59   29.44
  -4   3   0 1173.98   29.29
  -4  -3   0 1105.68   30.84
  -4  -3   0 1084.28   29.13
  -4  -3   0 1197.90   29.75
  -4   3   0 1153.28   30.35
  -4  -4   0  736.67   21.02
  -4   4   0  766.95   22.44
  -4   4   0  774.81   21.48
   4   4   0  759.58   21.48
   4  -4   0  790.76   22.02
   4   4   0  782.10   21.19
  -4  -4   0  795.98   21.38
  -4  -4   0  798.41   23.32
   4  -4   0  740.26   21.12
  -4   4   0  724.23   21.87
   4   4   0  790.06   21.15
  -4  -4   0  737.41   21.35
  -4   4   0  766.18   21.08
   4   5   0  158.92    8.41
  -4   5   0  175.22    8.78
  -4  -5   0  156.71    7.50
  -4   5   0  155.88    9.12
   4  -5   0  135.73    7.94
   4   5   0  147.76    7.49
   4   5   0  148.58    7.84
   4  -5   0  145.26    8.55
  -4   5   0  149.97    7.51
  -4  -5   0  152.41    9.74
   4   5   0  142.55    8.95
  -4  -6   0 2400.52   60.31
  -4   6   0 2446.60   61.24
  -4   6   0 2389.41   62.97
   4   6   0 2406.78   61.30
  -4  -6   0 2308.80   64.24
   4   6   0 2384.92   61.36
   4   6   0 2365.32   61.26
  -4   6   0 2448.09   61.25
   4  -6   0 2428.61   63.05
  -4   7   0  721.20   24.12
   4   7   0  750.23   24.13
   4  -7   0  793.52   25.98
  -4  -7   0  716.24   26.78
   4   7   0  730.13   24.17
   4   7   0  767.71   23.48
  -4   7   0  792.59   23.18
  -4   7   0  715.44   25.89
  -4  -7   0  732.25   22.03
   4   8   0  220.28   13.94
   4   8   0  247.17   15.10
  -4  -8   0  236.46   17.75
  -4   8   0  213.06   14.71
   4   8   0  232.41   14.73
   4  -8   0  253.44   16.20
  -4   8   0  237.24   16.07
   4   9   0   10.56    8.32
  -4   9   0   14.88   10.35
  -4   9   0   11.95    8.54
   4  -9   0   15.20    9.74
  -4  -9   0    8.61   10.48
   4   9   0    8.61    8.44
  -4 -10   0  320.17   23.30
   4 -10   0  266.35   20.33
  -4  10   0  341.28   24.30
   4  10   0  232.61   17.78
  -4  10   0  302.52   20.88
   4   0   1 2892.11   68.34
   4   0  -1 2994.26   68.50
  -4   0   1 2862.53   70.50
   4   0  -1 2951.29   68.80
  -4   0   1 2834.64   69.61
   4   0  -1 2973.56   70.49
   4   0  -1 2769.30   69.55
  -4   0   1 3009.74   70.51
   4   0   1 2881.14   70.59
   4   0   1 2972.00   69.82
   4   0  -1 2827.96   70.51
  -4   0   1 2784.71   68.80
  -4   0  -1 2897.33   70.58
   4   0   1 2871.32   69.49
  -4   0  -1 2892.31   69.50
   4   0  -1 2849.98   68.17
   4   0   1 2836.91   69.26
  -4   0  -1 2901.76   69.70
  -4   0  -1 2830.22   68.31
  -4   1   1  184.82    5.86
   4  -1   1  190.79    6.30
  -4  -1  -1  185.97    6.01
   4  -1  -1  179.75    5.90
   4  -1  -1  190.38    5.84
  -4   1  -1  176.04    5.74
  -4  -1   1  167.62    5.09
   4   1  -1  166.20    6.57
   4  -1  -1  194.72    6.42
   4   1  -1  182.57    4.95
  -4   1   1  184.86    5.70
   4   1   1  192.15    6.06
   4  -1   1  194.82    6.48
  -4  -1  -1  196.99    6.43
  -4  -1   1  187.90    7.03
   4   1   1  182.08    5.76
   4   1   1  190.09    6.61
  -4   1  -1  172.54    6.06
  -4   1   1  196.43    6.31
  -4   1  -1  198.29    6.46
   4   1   1  203.90    6.37
  -4   1   1  195.81    6.14
  -4   1   1  193.58    6.29
   4   1  -1  197.12    6.28
  -4  -1   1  180.30    6.40
   4  -1  -1  211.78    6.15
   4   1   1  190.17    6.05
   4  -1   1  179.28    5.76
  -4   1  -1  172.52    7.26
   4  -1   1  177.95    7.05
  -4  -1   1  178.83    6.17
   4   1  -1  190.31    6.51
   4   1  -1  188.35    6.20
  -4  -1  -1  182.09    6.48
   4   1   1  184.20    6.19
  -4  -1  -1  191.98    6.33
   4   1  -1  186.78    7.29
   4  -1  -1  204.79    6.44
   4  -2  -1   66.65    3.29
   4  -2   1   69.29    3.23
  -4   2   1   65.80    4.21
  -4  -2  -1   64.78    3.75
  -4  -2   1   75.11    2.84
   4   2   1   66.57    4.80
   4   2   1   70.49    3.96
   4   2  -1   69.78    4.63
  -4  -2   1   65.38    4.04
  -4   2   1   67.52    3.29
   4  -2   1   68.34    2.81
   4  -2  -1   65.61    3.71
   4   2   1   73.42    3.68
  -4   2  -1   70.24    3.18
   4   2  -1   71.61    4.02
  -4  -2  -1   72.10    4.01
  -4   2  -1   74.70    4.03
   4  -2  -1   62.81    3.33
   4  -2  -1   69.14    3.97
  -4  -2   1   71.72    4.92
   4   2  -1   71.82    2.77
   4  -2   1   73.38    4.45
   4  -2  -1   68.05    3.35
   4   2  -1   64.80    3.92
  -4   2  -1   70.50    4.05
  -4   2  -1   82.33    5.08
  -4   2   1   70.12    3.55
   4  -2   1   76.36    4.46
   4  -2  -1   73.76    4.71
   4  -2   1   68.72    5.20
  -4  -2  -1   71.12    4.53
  -4  -2   1   73.09    4.26
  -4  -2  -1   68.45    4.11
   4  -2  -1   73.74    4.32
  -4   2  -1   69.40    2.88
   4   2   1   65.32    4.36
  -4  -2  -1   70.61    3.31
   4   2  -1   77.61    5.76
  -4   3  -1  167.49    6.63
  -4   3   1  157.22    7.48
   4   3  -1  165.42    6.99
   4   3   1  163.76    7.12
   4   3   1  179.04    6.89
   4  -3  -1  170.60    7.06
  -4  -3   1  171.95    8.12
   4   3   1  163.45    6.09
   4  -3  -1  161.32    6.68
  -4  -3   1  174.31    5.86
   4  -3   1  164.50    7.90
  -4   3   1  160.52    5.77
  -4   3  -1  184.60    7.90
   4   3   1  149.33    5.88
  -4   3   1  158.12    7.31
   4  -3  -1  160.24    5.43
   4   3  -1  162.94    5.75
   4   3  -1  180.15    7.14
   4  -3   1  166.47    7.25
   4  -3   1  169.69    8.39
  -4  -3  -1  174.62    7.79
   4  -3   1  172.46    6.59
   4  -3  -1  162.18    5.42
   4  -3  -1  161.07    5.94
   4   3   1  175.26    6.55
  -4  -3  -1  163.73    6.68
  -4   3  -1  166.08    6.83
  -4  -3   1  166.80    6.77
  -4   3   1  159.32    6.33
  -4  -3  -1  154.50    6.67
  -4  -3  -1  160.67    7.07
  -4  -3   1  166.74    7.30
   4   3   1  154.57    8.71
   4   3  -1  168.60    7.52
  -4  -4   1  928.54   26.68
  -4   4  -1  889.12   25.61
  -4  -4   1  909.61   24.12
   4   4   1  860.28   23.35
  -4   4  -1  899.11   24.79
  -4   4   1  896.14   23.90
   4   4  -1  859.19   24.66
   4   4   1  900.49   24.04
   4   4   1  874.46   23.56
  -4   4   1  896.95   25.47
   4   4   1  857.10   24.33
   4  -4  -1  855.22   23.40
  -4   4  -1  926.43   24.88
   4  -4  -1  873.80   22.17
   4  -4  -1  918.13   25.22
   4  -4  -1  896.48   22.22
  -4   4   1  920.09   23.44
   4   4  -1  891.74   23.57
   4   4   1  885.62   24.49
  -4  -4  -1  918.22   26.19
   4   4  -1  850.68   24.60
   4  -4   1  897.93   24.75
  -4   5  -1  459.36   16.44
   4   5   1  448.08   14.91
   4  -5  -1  415.93   13.72
   4   5  -1  446.87   15.48
   4   5  -1  454.96   15.07
  -4  -5   1  445.09   17.15
   4  -5  -1  452.01   11.86
   4  -5   1  467.37   15.68
   4   5   1  436.46   15.02
   4  -5  -1  451.57   15.87
  -4   5  -1  443.20   15.72
  -4   5  -1  460.54   15.14
  -4  -5   1  429.18   14.54
  -4   5   1  461.13   16.35
   4   5  -1  470.83   14.51
  -4   5   1  464.23   14.81
   4  -5  -1  452.88   11.88
  -4  -5  -1  475.28   17.07
   4   5   1  464.50   13.87
  -4   5   1  429.44   13.40
  -4  -5  -1  491.44   14.87
   4   5  -1  421.53   15.26
  -4  -5   1  462.94   14.97
   4   5   1  433.44   13.57
   4   6   1   63.97    5.41
  -4  -6  -1   59.37    7.99
   4   6   1   47.27    6.08
   4   6  -1   40.84    5.79
   4  -6   1   60.47    7.23
  -4  -6  -1   56.14    5.89
  -4  -6   1   46.27    5.10
   4   6  -1   65.41    6.64
  -4  -6   1   46.09    7.99
  -4   6  -1   50.14    7.43
  -4   6   1   44.49    7.06
  -4   6  -1   58.35    7.18
   4  -6  -1   45.90    6.57
  -4   6  -1   41.10    5.70
  -4   6   1   61.23    6.60
   4   6   1   49.84    6.47
   4   6  -1   48.49    6.38
  -4   6   1   52.44    5.00
  -4   7   1   16.32   12.34
  -4   7   1    7.15    4.41
  -4  -7  -1    3.70    6.71
   4   7   1    6.61    5.90
  -4   7   1    8.20    5.66
   4   7  -1    1.90    5.37
   4  -7  -1    3.96    5.96
  -4   7  -1    2.04    6.56
   4   7   1    2.56    4.55
  -4   7  -1    3.65    5.86
  -4   7  -1    5.82    5.44
  -4  -7   1    5.99    4.08
  -4  -7   1    2.60    6.81
   4   7   1    4.11    5.28
   4   7  -1    5.45    5.42
  -4  -7  -1    5.41    4.76
   4   7  -1    6.62    5.61
   4  -7   1    5.15    6.28
  -4  -8  -1  218.15   16.50
   4   8  -1  237.92   14.31
   4  -8   1  194.22   18.29
   4  -8  -1  263.88   15.95
  -4   8  -1  209.44   15.36
  -4  -8   1  236.28   17.02
  -4   8   1  213.12   15.58
   4   8  -1  233.71   13.92
  -4   8  -1  217.83   14.18
   4   8  -1  207.61   14.47
  -4   8  -1  212.11   15.61
   4   8   1  242.43   14.23
   4   8   1  207.53   13.83
   4  -9  -1  153.82   14.88
  -4  -9   1  155.56   15.76
   4   9   1  155.79   14.03
  -4  -9  -1  151.42   15.52
  -4   9   1  123.11   12.16
  -4   9  -1  143.44   13.76
  -4   9  -1  159.69   15.25
  -4   9   1  146.56   14.62
   4   9  -1  150.29   13.83
   4   9   1  133.84   12.64
   4   9  -1  168.28   14.18
   4  -9   1  169.63   15.49
   4 -10  -1   21.70   12.31
   4 -10   1   24.32   12.73
   4  10   1   16.08   11.03
  -4 -10  -1   24.59   13.65
  -4  10  -1   13.91   10.78
  -4  10   1   26.34   11.11
  -4  10   1   12.05   12.22
  -4  10  -1   15.13   12.96
  -4 -10   1   20.98   12.33
   4  10  -1   14.65   10.68
   4  10   1   18.80   10.98
  -4   0  -2 2191.49   52.70
  -4   0  -2 2116.90   51.39
   4   0  -2 2267.21   53.50
   4   0   2 2132.69   52.64
  -4   0  -2 2103.48   52.01
  -4   0  -2 2099.67   53.28
   4   0  -2 2213.09   51.55
  -4   0  -2 2091.15   52.83
   4   0   2 2162.22   51.47
   4   0   2 2143.05   52.94
   4   0  -2 2212.98   51.47
   4   0   2 2123.71   53.32
   4   0  -2 2160.10   52.88
   4   0  -2 2171.15   53.05
  -4   0   2 2130.95   52.72
  -4   0   2 2177.11   51.56
   4   0  -2 2055.86   53.64
  -4   0  -2 2114.45   52.05
   4   1   2    3.62    1.76
  -4   1  -2    1.15    1.51
  -4  -1  -2    2.47    2.29
   4  -1   2    5.44    0.94
   4   1   2    6.32    1.73
  -4  -1  -2    4.25    1.28
  -4  -1   2    3.77    2.42
  -4   1  -2    5.50    1.94
   4  -1  -2    1.12    1.90
   4  -1   2    1.91    2.38
  -4  -1   2    2.50    1.84
   4   1   2    3.73    1.84
  -4   1   2    1.13    1.51
  -4   1  -2    2.38    1.55
  -4  -1   2    6.00    2.37
  -4  -1  -2    3.51    1.70
  -4   1   2    2.87    1.16
   4  -1   2    5.35    1.97
   4  -1  -2    1.81    1.39
   4  -1  -2    1.94    1.85
   4  -1  -2    1.48    1.41
   4   1   2    1.41    1.26
   4  -1   2    6.83    2.15
   4   1  -2    4.12    1.67
  -4   1  -2    3.57    1.11
  -4  -1  -2    3.23    1.46
   4  -1  -2    4.26    2.59
  -4   1   2    1.46    1.67
   4   1  -2    2.46    3.24
   4   1   2    0.32    2.25
   4   1  -2    2.33    1.73
   4  -1   2    3.56    1.74
  -4  -1   2    2.55    1.67
   4  -1  -2    1.64    1.82
  -4  -1  -2    3.41    1.65
   4  -1  -2    3.48    1.33
   4  -2  -2 1293.28   31.96
   4  -2   2 1241.90   31.65
   4   2  -2 1279.49   32.24
   4  -2  -2 1243.29   33.08
  -4  -2  -2 1233.56   32.92
  -4   2  -2 1276.82   33.27
  -4  -2   2 1191.30   33.10
   4   2   2 1242.64   31.89
   4   2  -2 1229.41   34.23
  -4  -2  -2 1276.79   32.70
  -4   2  -2 1270.30   31.44
  -4  -2   2 1270.59   34.08
  -4  -2   2 1253.33   32.13
   4  -2   2 1253.66   31.35
  -4   2   2 1291.87   31.65
  -4   2   2 1247.35   30.89
   4  -2  -2 1302.56   32.71
   4   2   2 1299.59   31.23
   4   2  -2 1324.42   33.39
  -4   2  -2 1208.57   31.38
   4   2   2 1226.01   32.60
   4  -2   2 1268.24   33.35
  -4   2  -2 1293.33   32.25
   4  -2   2 1271.83   33.29
   4   2  -2 1209.99   32.66
   4  -2  -2 1279.22   33.18
   4  -2  -2 1325.78   32.27
  -4  -2  -2 1285.16   32.73
   4  -2   2 1281.28   32.27
   4  -2  -2 1248.76   31.68
  -4  -2  -2 1286.67   31.87
   4   2   2 1333.11   32.76
   4   2   2 1268.27   30.96
   4   2   2 1247.02   32.93
  -4  -2   2 1319.85   32.60
   4  -2  -2 1253.82   30.98
   4  -2   2 1292.82   33.76
  -4   2   2 1292.86   32.71
   4   3  -2   16.14    3.38
  -4   3   2   15.92    1.91
  -4  -3   2   19.00    2.97
   4  -3   2   18.59    3.01
   4   3   2   16.76    2.31
   4  -3  -2   13.47    2.43
   4   3  -2    7.33    3.58
   4  -3  -2   12.61    2.56
  -4   3  -2   14.56    2.90
  -4   3  -2   15.86    1.97
  -4   3  -2   18.10    3.58
   4   3  -2   16.92    3.32
   4  -3  -2   20.42    2.81
  -4   3  -2   12.41    2.85
   4   3   2   13.78    2.42
   4   3   2   15.45    3.13
  -4  -3   2   19.42    1.97
  -4   3   2   13.15    2.26
  -4  -3  -2   15.75    2.93
  -4  -3  -2   19.28    1.98
   4  -3  -2   17.92    3.46
   4  -3   2   23.83    4.36
  -4  -3   2   18.28    4.02
  -4   3   2   10.87    2.85
   4  -3   2   18.25    2.04
   4  -3  -2   17.13    2.09
   4   3  -2   15.05    2.08
   4   3   2    9.13    3.53
  -4  -3  -2   13.71    3.26
  -4   4   2  938.00   24.55
  -4   4   2  956.19   27.38
   4  -4  -2  966.63   24.95
   4   4   2  951.66   24.97
  -4  -4   2  944.97   28.50
   4   4   2 1004.67   27.04
  -4  -4   2  957.46   24.79
   4   4   2  966.30   24.98
   4  -4  -2  924.82   24.63
   4   4  -2  957.34   27.21
   4  -4  -2  970.62   24.98
  -4   4  -2  992.36   28.04
   4  -4  -2 1003.79   27.62
  -4   4  -2  936.22   27.15
  -4  -4  -2 1039.31   28.25
  -4   4  -2  964.50   26.46
   4   4  -2  997.90   27.05
  -4  -4  -2  963.67   26.43
   4  -4  -2  926.13   25.41
   4  -4   2  980.25   26.70
   4   4  -2  959.14   25.07
  -4   4   2 1013.61   25.33
  -4   4  -2  956.00   23.59
  -4  -4  -2  901.03   25.39
  -4   4  -2  995.28   27.06
  -4   5  -2   82.66    7.70
   4   5   2   68.96    6.51
   4  -5  -2   63.46    4.68
   4  -5   2   71.74    6.63
  -4   5  -2   62.69    6.46
  -4   5  -2   80.52    6.76
   4   5  -2   72.20    6.86
  -4  -5   2   71.15    5.63
   4   5   2   68.39    5.24
  -4   5   2   59.19    4.24
   4  -5  -2   93.32    7.71
   4   5  -2   66.67    5.38
  -4  -5  -2   67.78    5.78
   4   5   2   77.39    5.90
  -4  -5   2   66.09    5.50
  -4   5   2   66.95    5.45
   4   5  -2   66.14    6.32
  -4   5   2   67.61    7.04
  -4  -5  -2   79.20    7.74
   4  -5  -2   67.64    4.67
   4   5   2   65.57    4.73
  -4  -5   2   63.46    7.19
   4  -5  -2   64.85    4.82
   4   6   2  476.12   14.48
   4   6  -2  467.02   16.34
  -4   6  -2  519.54   19.27
   4  -6  -2  469.47   13.79
   4  -6   2  511.90   18.14
  -4  -6  -2  462.98   18.54
  -4  -6   2  489.23   15.31
  -4  -6   2  484.64   19.52
  -4  -6  -2  465.20   16.29
  -4   6   2  462.56   18.23
  -4   6  -2  468.99   17.39
   4   6   2  498.39   16.57
  -4   6   2  481.58   16.11
   4   6   2  463.51   17.55
  -4   6   2  473.77   13.82
  -4   6  -2  481.66   18.28
   4   6  -2  501.22   17.59
   4   6  -2  472.36   17.83
   4  -6  -2  458.36   17.97
   4   7  -2   23.11    6.81
   4   7   2   33.89    7.40
  -4   7  -2   36.94    7.88
   4   7   2   27.37    6.30
  -4   7  -2   36.39    8.74
   4   7  -2   40.18    7.03
  -4  -7  -2   31.48    6.14
   4  -7   2   32.68    7.63
  -4   7   2   43.06    8.20
  -4   7   2   25.43    6.19
  -4  -7   2   31.83    5.78
  -4  -7   2   22.26    7.93
  -4   7  -2   33.68    6.94
   4  -7  -2   26.13    7.81
   4   7  -2   33.34    7.05
  -4  -7  -2   29.48    8.25
   4   8  -2  283.11   16.05
  -4   8   2  280.77   15.33
  -4   8  -2  295.70   16.03
   4   8  -2  302.62   16.81
  -4   8   2  277.07   16.86
  -4   8  -2  267.59   16.54
   4   8   2  273.21   16.08
  -4  -8  -2  269.51   17.65
   4   8   2  268.69   15.40
   4   8  -2  266.36   16.04
  -4   8  -2  292.10   18.70
   4  -8   2  269.23   18.76
   4  -8  -2  256.68   16.54
  -4  -8   2  303.88   19.15
   4   9   2   19.70    9.54
  -4  -9   2   10.21    9.87
  -4  -9  -2   13.74   10.26
  -4   9  -2    7.59    9.01
  -4   9   2    9.52    8.92
   4   9   2   22.96    9.29
   4  -9  -2   12.43    9.02
  -4   9   2   14.36    9.59
   4   9  -2   11.37    8.93
   4   9  -2   18.16    9.54
  -4   9  -2   20.87    9.90
   4  -9   2   14.38   10.12
  -4   9  -2   10.76   11.12
   4  10  -2   52.33   12.75
   4  10   2   56.92   13.10
  -4  10  -2   70.42   13.80
  -4  10   2   81.19   14.49
  -4 -10   2   59.34   14.36
   4 -10   2   68.37   14.32
  -4  10  -2   84.97   15.86
   4 -10  -2   64.92   14.29
   4   0  -3 3497.81   86.57
   4   0  -3 3627.55   87.60
   4   0   3 3610.76   86.68
  -4   0   3 3601.28   88.20
   4   0  -3 3520.63   84.94
  -4   0  -3 3556.58   86.23
  -4   0  -3 3653.72   86.54
  -4   0  -3 3633.08   84.34
  -4   0  -3 3666.09   87.62
  -4   0  -3 3546.05   86.21
   4   0  -3 3511.31   88.01
   4   0  -3 3631.86   84.28
  -4   0  -3 3460.34   86.46
  -4   0   3 3420.87   84.14
  -4   0   3 3587.10   84.97
   4   0   3 3454.83   86.30
  -4   0   3 3495.56   87.43
   4   0   3 3546.56   87.59
  -4  -1   3  167.97    7.12
  -4  -1  -3  165.63    7.53
   4   1  -3  163.81    7.01
   4  -1  -3  156.01    7.74
  -4   1  -3  157.58    7.83
   4   1  -3  173.66    7.68
   4  -1   3  165.07    6.72
   4   1   3  161.19    5.55
   4  -1  -3  171.48    5.90
   4  -1  -3  158.72    6.00
  -4  -1   3  167.62    4.84
   4  -1   3  152.20    7.20
   4  -1   3  153.53    5.40
   4  -1  -3  163.11    7.21
  -4   1  -3  163.49    6.63
   4   1  -3  153.94    8.37
   4  -1  -3  167.96    7.05
   4  -1  -3  168.67    5.35
  -4  -1   3  160.25    8.30
  -4   1  -3  146.24    7.63
  -4   1   3  162.93    7.92
   4  -1   3  169.07    7.32
   4   1   3  153.62    7.70
  -4  -1  -3  126.86    6.15
   4  -1  -3  166.50    5.28
  -4  -1  -3  168.50    6.42
  -4   1   3  156.77    6.20
  -4  -1  -3  162.64    5.36
   4   1  -3  168.83    6.35
  -4  -1  -3  183.12    6.23
   4  -1   3  157.57    6.59
   4  -1  -3  158.94    6.97
   4   1  -3  157.29    4.89
  -4   1  -3  171.86    6.39
  -4  -1  -3  163.80    7.55
  -4  -1   3  157.96    6.40
   4   1   3  148.10    6.97
  -4   1  -3  156.10    5.75
   4  -2  -3   40.69    3.99
  -4  -2  -3   37.55    2.91
  -4  -2  -3   50.51    4.57
  -4  -2  -3   48.86    5.08
   4   2  -3   48.76    4.62
  -4  -2   3   37.30    4.16
   4  -2   3   50.01    4.83
  -4  -2   3   42.86    5.06
   4   2   3   39.37    2.90
  -4  -2   3   35.65    3.71
   4   2   3   45.54    4.41
  -4   2  -3   61.19    6.23
   4   2   3   33.13    2.96
   4   2   3   36.61    2.69
   4  -2  -3   36.80    2.86
  -4   2  -3   46.32    3.80
   4  -2  -3   36.55    2.71
  -4   2  -3   42.97    4.00
  -4   2  -3   42.12    3.59
   4  -2   3   36.09    3.86
   4  -2  -3   27.62    3.79
   4   2   3   35.11    4.20
  -4   2  -3   24.86    3.41
   4   2  -3   51.29    5.18
  -4   2   3   38.53    4.18
   4  -2  -3   36.89    2.65
  -4   2   3   39.47    3.88
   4  -2  -3   40.39    4.66
  -4   2   3   40.36    2.56
   4  -2   3   39.91    3.17
   4   2  -3   39.08    3.86
  -4   3  -3   10.26    3.38
   4  -3  -3   14.37    3.02
  -4  -3  -3   15.98    2.07
  -4  -3  -3   24.15    4.16
   4  -3   3    6.96    3.67
  -4  -3   3   13.83    1.76
   4  -3   3   13.89    2.84
  -4   3  -3   13.60    2.68
  -4   3   3    8.51    3.13
   4  -3   3   12.25    2.93
  -4  -3   3   20.62    2.11
   4   3   3   13.69    2.30
   4  -3  -3   15.50    2.55
   4   3  -3   12.25    3.38
  -4   3  -3   14.69    3.68
   4  -3  -3   21.48    3.79
   4   3   3   16.43    2.45
  -4  -3   3   14.24    4.27
  -4   3   3   15.08    2.16
   4   3   3   10.75    3.44
   4   3  -3   13.34    3.33
  -4  -3   3   13.45    3.00
   4  -3  -3   14.81    3.54
   4   3   3   14.82    2.41
  -4  -3  -3   11.97    3.14
   4  -3  -3   17.66    2.08
   4  -3  -3   17.41    2.07
  -4   3  -3   20.17    3.83
  -4   4  -3 1665.83   43.90
  -4   4  -3 1643.09   40.19
  -4  -4  -3 1586.92   40.44
   4   4   3 1698.92   40.55
  -4   4   3 1643.37   40.08
   4   4  -3 1665.93   42.73
  -4  -4   3 1623.05   39.96
   4   4   3 1582.68   40.40
   4   4   3 1652.96   43.17
   4  -4  -3 1490.40   39.80
   4  -4  -3 1591.07   39.88
  -4   4  -3 1551.42   42.24
  -4  -4  -3 1616.29   43.98
  -4  -4   3 1712.72   41.93
  -4  -4  -3 1684.19   42.62
  -4   4  -3 1681.11   42.93
   4  -4  -3 1681.99   44.02
   4   4   3 1650.48   40.48
  -4   4  -3 1597.92   40.18
  -4  -4   3 1639.90   44.99
  -4  -4   3 1648.20   40.69
  -4   4   3 1679.73   43.46
   4  -4   3 1677.48   44.29
   4   4  -3 1633.28   43.78
   4  -4   3 1615.68   42.60
   4  -4  -3 1450.11   41.14
   4   5  -3  876.88   26.82
  -4   5   3  925.64   23.97
  -4  -5  -3  890.82   27.59
   4   5   3  914.50   24.38
   4   5  -3  863.66   26.60
   4  -5  -3  873.59   27.27
   4  -5  -3  885.24   24.31
   4  -5   3  920.36   28.09
   4   5   3  862.91   22.80
  -4   5  -3  855.56   26.78
  -4  -5   3  903.74   24.74
   4   5  -3  873.44   24.51
  -4   5  -3  890.68   22.48
   4   5   3  868.52   26.74
   4  -5   3  895.51   26.44
  -4   5  -3  935.56   26.98
  -4  -5  -3  906.23   25.72
  -4   5   3  896.40   27.22
  -4  -5   3  881.95   28.27
  -4   6   3   29.69    6.92
  -4  -6  -3   26.29    5.37
   4   6  -3   47.22    6.45
   4  -6   3   41.85    7.23
  -4  -6  -3   27.77    6.68
   4  -6  -3   26.39    6.68
   4   6  -3   39.21    7.18
   4   6  -3   46.59    7.12
  -4  -6   3   29.21    7.46
  -4   6  -3   43.28    7.49
  -4   6   3   42.68    5.33
   4  -6  -3   44.27    4.99
  -4  -6   3   36.13    4.89
  -4   6  -3   29.92    6.09
   4  -6   3   46.39    8.20
   4   6   3   35.84    6.57
   4   6   3   36.30    5.51
   4   7   3  156.35   11.03
  -4  -7  -3  165.97   11.13
   4   7  -3  143.58   11.29
   4   7  -3  143.67   12.10
   4  -7  -3  134.18   11.48
  -4  -7   3  148.44   13.15
   4   7   3  159.02   12.03
  -4  -7  -3  145.85   12.52
   4   7  -3  174.27   17.32
  -4   7   3  147.85   11.79
  -4   7  -3  141.07   11.19
   4  -7   3  193.78   13.33
  -4   7  -3  157.44   12.28
   4  -7   3  157.76   13.26
  -4   7   3  157.92   10.52
   4   8  -3  558.19   23.08
  -4   8  -3  514.65   23.37
  -4   8  -3  557.91   22.82
   4   8  -3  566.00   23.41
   4   8   3  565.94   23.07
  -4  -8   3  562.76   24.92
   4  -8   3  577.46   25.31
   4  -8   3  616.91   26.20
  -4  -8  -3  548.14   24.98
   4   8   3  538.47   21.00
  -4   8   3  561.09   21.37
  -4   8   3  497.58   23.32
   4  -8  -3  578.80   23.80
   4   9   3  302.54   20.44
   4  -9   3  330.79   22.92
  -4   9  -3  264.32   19.45
  -4   9  -3  334.88   19.88
  -4  -9  -3  299.65   20.67
  -4   9   3  280.62   20.58
   4   9  -3  315.26   20.59
  -4  -9   3  309.89   21.32
   4  -9  -3  336.23   20.79
   4  -9   3  289.98   20.75
   4   9  -3  317.31   19.50
   4  10  -3   -0.67   11.21
   4 -10  -3   -3.24   11.73
   4 -10   3   -1.40   14.30
  -4  10  -3    1.53   11.58
  -4 -10   3    2.80   12.78
  -4 -10  -3   -1.10   12.57
   4  10   3    4.49   11.39
  -4  10   3    4.98   11.37
   4   0  -4   25.78    3.11
   4   0   4   32.72    3.40
  -4   0  -4   31.41    3.61
  -4   0   4   35.73    3.27
  -4   0   4   28.37    4.38
   4   0   4   32.54    4.05
  -4   0  -4   36.55    3.88
   4   0   4   27.50    4.12
  -4   0   4   28.94    2.89
  -4   0  -4   31.56    4.04
  -4   0  -4   36.18    3.15
   4   0  -4   32.12    3.01
  -4   0   4   38.79    4.36
  -4   0  -4   34.08    3.42
   4   1   4  932.21   26.79
   4  -1  -4 1013.03   24.75
   4  -1   4 1033.69   27.86
  -4  -1   4  995.94   25.18
   4   1  -4 1070.13   26.37
  -4   1   4 1039.88   26.66
   4  -1  -4 1031.36   24.92
   4   1   4 1010.20   25.17
   4  -1  -4 1046.09   26.83
  -4   1  -4 1037.37   27.84
   4  -1  -4 1023.08   27.91
  -4  -1   4  990.49   26.10
  -4   1   4 1017.61   28.30
   4   1   4  999.92   27.68
  -4   1  -4  988.37   26.21
  -4  -1  -4 1008.43   25.04
  -4   1  -4  993.87   26.50
   4   1  -4  981.78   25.29
   4  -1   4  984.49   26.39
   4  -1  -4  997.17   26.70
  -4  -1  -4  973.06   26.92
  -4  -1  -4  966.41   26.97
  -4  -1  -4 1025.80   26.79
   4   1  -4 1023.20   27.90
  -4  -1  -4  981.42   27.49
   4  -1   4 1000.40   26.19
   4   1  -4 1040.37   27.98
  -4  -1   4 1067.52   28.99
  -4   1  -4  981.68   27.14
   4  -2  -4  918.45   23.30
   4   2   4  916.37   25.14
   4  -2  -4  845.75   21.56
   4   2  -4  914.34   25.52
   4   2   4  832.06   23.39
  -4   2  -4  897.14   24.10
   4  -2   4  862.73   23.50
  -4  -2  -4  881.06   23.30
   4  -2  -4  883.41   21.64
   4   2  -4  901.47   25.06
   4  -2   4  849.54   24.09
   4  -2  -4  920.96   24.99
  -4   2  -4  873.27   25.32
   4  -2  -4  891.13   22.97
   4  -2   4  890.34   25.45
  -4  -2  -4  907.00   24.92
  -4  -2  -4  906.54   25.05
  -4   2  -4  854.71   23.78
   4   2   4  875.04   22.00
  -4  -2   4  872.50   21.75
  -4   2   4  905.28   24.53
  -4   2  -4  891.50   24.11
   4   2  -4  829.10   22.25
  -4   2   4  868.73   25.43
   4   2   4  888.06   22.09
  -4  -2   4  858.90   26.30
   4   2  -4  854.77   23.99
  -4  -3   4 1273.42   35.32
  -4   3   4 1158.51   29.19
   4   3   4 1189.16   30.89
   4   3   4 1240.28   29.89
  -4  -3  -4 1229.08   33.09
   4  -3   4 1219.86   32.20
   4   3   4 1201.86   29.73
  -4   3  -4 1182.07   33.47
   4  -3   4 1142.49   31.68
   4  -3  -4 1190.96   29.48
  -4  -3  -4 1211.27   30.73
   4  -3  -4 1244.02   30.58
   4   3   4 1239.79   33.51
   4   3  -4 1173.10   32.40
  -4   3  -4 1258.95   32.75
  -4  -3  -4 1230.94   33.70
   4  -3   4 1238.44   33.88
  -4   3   4 1237.08   33.18
  -4  -3   4 1215.39   29.63
   4  -3  -4 1268.88   32.75
  -4   3  -4 1232.10   32.81
   4  -3  -4 1111.30   33.57
  -4   3  -4 1211.84   33.93
   4   3  -4 1214.73   33.02
   4  -3  -4 1183.31   30.39
   4   3  -4 1196.19   33.83
  -4  -3   4 1216.31   29.73
  -4  -4   4   30.60    4.43
  -4   4  -4   28.03    5.21
   4  -4  -4   36.08    4.56
   4   4  -4   34.60    5.56
   4  -4   4   36.95    6.24
  -4  -4   4   36.61    3.45
  -4  -4   4   37.75    3.54
   4   4   4   30.25    3.53
  -4   4  -4   19.17    6.05
   4  -4  -4   34.67    4.82
  -4   4   4   35.66    3.07
   4   4   4   44.31    5.94
   4   4  -4   36.20    5.81
  -4  -4  -4   43.02    6.18
  -4   4   4   29.12    5.41
  -4   4  -4   44.38    4.35
   4   4   4   35.49    3.12
  -4   4  -4   32.95    4.98
  -4  -4  -4   29.78    4.93
   4  -4  -4   31.67    5.49
  -4  -4   4   45.55    7.07
  -4   4  -4   33.34    5.56
   4   4   4   42.42    3.80
   4  -4   4   37.95    5.56
  -4  -4  -4   33.25    2.49
  -4   5  -4  261.82   13.51
   4  -5  -4  294.55   13.79
  -4  -5   4  276.28   14.61
   4  -5   4  274.99   14.11
  -4  -5   4  277.62   10.40
   4  -5  -4  296.74   11.55
   4   5  -4  249.18   12.95
  -4   5   4  267.25   13.32
   4   5   4  276.83   10.22
  -4   5   4  280.17    9.58
  -4   5  -4  266.23    9.91
   4   5  -4  273.66   13.19
  -4  -5  -4  296.48   13.95
   4  -5   4  291.00   12.66
  -4  -5  -4  287.39   12.35
   4   5   4  285.96   13.30
  -4   5  -4  271.49   13.22
   4  -6  -4  364.77   13.96
  -4  -6   4  398.17   18.32
   4  -6   4  380.17   16.12
  -4  -6  -4  367.30   17.08
   4   6  -4  394.74   17.05
  -4   6   4  347.73   16.70
   4   6  -4  356.57   16.51
   4   6   4  381.54   13.74
  -4   6  -4  358.15   16.78
  -4   6   4  397.71   13.04
  -4  -6  -4  386.86   15.44
   4   6  -4  383.54   15.11
   4  -6   4  395.17   17.53
  -4   6  -4  376.30   16.71
   4  -6  -4  355.26   18.92
   4   7  -4  435.03   19.68
   4  -7  -4  450.95   20.05
   4  -7   4  440.42   19.33
  -4  -7  -4  480.30   21.20
   4   7   4  463.33   20.01
  -4  -7  -4  459.97   18.16
   4   7  -4  431.64   19.66
  -4   7  -4  467.51   19.91
  -4  -7   4  456.95   21.36
  -4   7  -4  418.74   19.64
   4  -7   4  466.75   20.94
   4  -8   4   17.66   10.32
   4  -8  -4    3.24    8.43
  -4  -8   4    9.22    9.37
   4   8   4    3.07    8.25
  -4   8  -4    5.13    8.52
  -4   8   4   13.69    8.87
   4   8  -4    2.56    8.09
  -4   8  -4    6.84    8.74
  -4  -8  -4    4.68    8.75
   4   8  -4   14.85    9.16
  -4   9  -4   82.85   13.29
   4   9  -4   78.88   12.42
   4  -9   4  131.47   16.21
  -4   9  -4   78.44   12.36
  -4   9   4   74.84   12.78
   4  -9  -4   83.28   13.26
  -4  -9   4   97.12   14.44
  -4  -9  -4  103.98   14.48
   4   9  -4  103.05   13.58
   4   9   4   93.56   13.41
   4   0  -5    1.06    3.59
  -4   0  -5    2.81    3.30
  -4   0   5    1.50    2.85
   4   0  -5    3.42    3.33
   4   0   5    3.66    2.90
  -4   0  -5    0.23    2.85
  -4   0   5    0.07    3.53
  -4   0  -5    2.03    2.31
   4   0  -5    2.66    2.28
  -4   0   5    2.48    2.38
  -4   0  -5    2.56    3.93
   4   0  -5    0.26    2.85
   4   0   5    1.23    3.06
  -4   1  -5   86.98    6.48
   4  -1  -5   93.61    4.34
   4  -1  -5   96.21    4.29
   4   1  -5   73.67    6.53
  -4  -1  -5   82.89    4.33
   4  -1   5   93.74    7.05
  -4   1   5   95.45    6.01
   4   1   5   87.54    6.79
  -4  -1  -5  104.66    7.51
  -4   1  -5   96.38    7.01
  -4   1   5   91.28    7.28
  -4   1  -5   96.64    5.75
  -4  -1  -5  103.72    6.02
   4  -1  -5   95.91    7.15
  -4  -1  -5   89.48    6.32
   4   1  -5   84.82    5.72
  -4  -1   5   93.74    7.76
  -4   1  -5   87.16    6.68
   4   1  -5   94.94    5.81
   4   1   5   80.95    4.99
  -4  -1   5   96.64    4.90
   4   1  -5   88.21    6.64
   4  -1   5   87.25    5.69
   4  -1  -5   92.79    5.81
   4   2  -5 1900.20   50.85
   4   2   5 1859.16   45.83
   4   2  -5 1827.29   47.15
   4   2   5 1898.95   45.88
   4   2  -5 1959.77   50.25
   4  -2  -5 1962.78   48.55
   4  -2  -5 1873.50   48.00
  -4   2  -5 1830.62   49.08
  -4   2   5 1929.44   51.00
   4   2   5 1931.99   50.04
  -4   2   5 1963.91   49.32
  -4  -2   5 1974.00   46.68
   4   2   5 1873.23   48.74
   4  -2  -5 1978.28   50.24
  -4  -2  -5 1944.97   50.09
  -4   2  -5 1968.69   49.30
   4  -2   5 1854.12   49.86
   4   2  -5 1892.10   48.36
   4  -2  -5 1890.12   45.21
  -4  -2  -5 1943.50   48.49
   4  -2   5 1901.69   48.73
  -4   2  -5 1927.90   50.85
  -4  -2   5 1953.51   51.90
  -4  -2  -5 1905.34   50.09
  -4   2  -5 1902.81   48.46
  -4   3  -5  315.53   14.17
   4   3  -5  362.40   13.51
  -4  -3   5  337.19   11.38
  -4  -3   5  374.25   15.86
   4  -3  -5  333.22   13.27
  -4   3   5  343.93   13.48
   4  -3   5  371.72   14.35
   4   3   5  340.87   10.13
   4  -3  -5  348.26   10.69
   4   3  -5  335.03   13.93
   4   3   5  350.19    9.74
  -4   3  -5  375.23   12.94
   4   3  -5  344.95   13.62
  -4  -3   5  353.88   10.14
   4   3   5  334.98   13.91
  -4   3  -5  342.04   14.03
  -4  -3  -5  345.32   10.73
  -4  -3  -5  361.38   13.89
   4   3   5  337.90   12.03
  -4   3  -5  361.18   13.51
   4  -3  -5  335.38   14.12
  -4  -3  -5  358.64   14.07
  -4   4  -5   42.59    6.28
   4  -4  -5   34.30    6.37
  -4   4  -5   43.72    6.84
  -4  -4   5   37.30    3.56
  -4  -4  -5   52.53    6.95
   4   4   5   54.43    6.96
   4  -4   5   41.48    5.79
  -4  -4  -5   34.69    5.95
   4   4  -5   43.45    6.09
  -4   4   5   38.64    6.61
   4   4  -5   42.79    6.63
   4  -4   5   41.56    6.66
  -4  -4  -5   39.97    3.02
   4   4  -5   31.63    5.89
   4  -4  -5   42.03    5.94
  -4   4  -5   46.54    5.52
   4   4   5   39.54    3.52
  -4  -4   5   39.85    7.23
   4   5   5    6.68    5.79
  -4  -5   5    3.95    6.22
  -4   5  -5    1.09    4.06
   4   5  -5    4.38    5.38
  -4   5  -5    5.03    5.97
  -4   5   5    1.56    5.25
  -4  -5  -5    5.19    5.64
   4  -5   5    0.80    5.13
   4  -5  -5    2.77    4.71
  -4  -5  -5    3.75    4.98
   4  -5  -5    0.11    6.10
   4   5  -5    4.23    5.18
  -4   5  -5    2.57    5.35
   4   5  -5    6.10    4.96
   4  -5   5    3.65    5.95
   4   6  -5  669.57   24.49
  -4   6   5  677.40   24.46
   4   6  -5  684.29   24.10
   4   6  -5  653.58   22.12
   4  -6  -5  644.99   21.54
  -4  -6   5  650.78   25.67
  -4  -6  -5  655.47   22.86
  -4   6  -5  640.66   24.12
  -4  -6  -5  660.97   24.67
   4   6   5  665.39   24.43
   4  -6  -5  612.79   24.41
  -4   6  -5  657.91   24.35
   4  -6   5  691.21   23.22
   4  -6   5  656.35   24.31
   4  -7   5  248.85   16.03
   4   7  -5  284.95   16.87
   4   7   5  229.31   16.31
  -4   7  -5  256.19   16.62
  -4  -7   5  270.56   18.50
  -4   7  -5  249.42   16.53
  -4  -7  -5  269.26   17.01
  -4   7   5  267.87   16.80
  -4  -7  -5  282.39   19.53
   4  -7  -5  263.38   17.02
   4   7  -5  262.65   17.66
  -4  -8  -5   12.10    9.78
  -4   8   5   17.33    9.65
   4   8   5   14.71    9.68
   4   8  -5   13.53    8.98
  -4   8  -5    8.77    9.08
   4  -8   5   25.29   10.98
  -4   8  -5   17.21    9.42
  -4  -8   5   15.98   10.58
   4   8  -5   15.90    9.72
   4  -8  -5   10.20    9.33
  -4  -9   5   15.62   12.53
  -4   9  -5   18.13   11.38
   4  -9  -5   22.95   12.60
   4   9  -5   14.10   11.28
   4   9   5   15.86   11.50
  -4   0  -6 2177.86   55.03
  -4   0   6 2086.69   56.16
   4   0  -6 2134.93   54.99
  -4   0  -6 2126.94   54.99
   4   0  -6 2104.26   51.42
  -4   0  -6 2104.59   51.47
  -4   0  -6 2129.18   54.26
  -4   0   6 2029.47   51.50
  -4   0   6 2167.48   52.90
   4   0   6 2004.18   51.63
   4   0  -6 2020.56   55.29
   4   0   6 2111.30   54.81
   4   1  -6   24.68    5.17
  -4   1   6   29.55    5.77
   4  -1   6   39.61    5.69
  -4  -1   6   27.57    5.80
   4  -1  -6   24.26    4.45
  -4   1  -6   34.02    5.60
  -4  -1  -6   24.41    5.24
  -4   1  -6   28.07    4.18
   4  -1  -6   26.80    5.54
  -4   1   6   25.88    4.41
  -4  -1  -6   26.16    4.41
   4   1   6   29.11    5.14
  -4  -1  -6   28.38    4.93
  -4  -1  -6   24.85    2.99
   4   1  -6   26.78    4.25
   4  -1  -6   25.04    2.96
  -4  -1   6   24.93    3.62
   4   1  -6   32.06    5.89
  -4   1  -6   32.22    5.52
   4  -1   6   31.56    4.58
   4  -2  -6 1251.63   33.65
   4   2   6 1236.84   35.72
  -4  -2  -6 1239.16   35.31
  -4   2  -6 1262.25   36.11
   4  -2   6 1275.53   34.14
   4   2  -6 1286.77   35.99
  -4   2  -6 1256.36   33.90
  -4  -2   6 1244.12   37.11
  -4  -2  -6 1219.56   35.58
   4  -2   6 1252.61   35.40
  -4   2   6 1269.44   36.44
   4  -2  -6 1233.08   35.74
  -4   2  -6 1263.76   34.98
   4   2  -6 1248.73   36.22
   4   2  -6 1274.55   33.96
  -4  -2   6 1282.85   32.12
   4   2   6 1261.26   30.70
  -4   2   6 1289.55   34.81
  -4  -2  -6 1279.95   33.63
   4  -3   6    9.83    5.24
  -4   3  -6   11.61    4.90
   4  -3  -6    4.69    5.11
   4   3   6    9.40    5.04
  -4  -3  -6    9.03    4.72
  -4  -3   6    1.42    5.81
   4   3  -6   14.63    5.39
  -4  -3   6    8.68    2.95
  -4  -3  -6   11.19    3.33
  -4  -3  -6   16.01    5.59
  -4   3  -6    8.96    4.79
   4   3  -6   17.03    5.71
  -4   3  -6   15.14    5.60
   4   3  -6   10.14    4.78
   4  -3   6   10.65    4.49
   4  -3  -6    5.47    4.80
  -4   3   6   13.74    5.01
   4  -3  -6    6.69    3.22
  -4   4   6 1226.25   35.66
   4   4  -6 1211.92   35.00
   4  -4   6 1197.50   34.34
  -4  -4  -6 1209.18   36.16
   4   4  -6 1263.94   35.16
  -4   4  -6 1189.66   34.86
   4   4   6 1212.05   44.68
   4  -4  -6 1218.53   35.26
   4  -4   6 1182.01   35.39
  -4  -4   6 1247.05   37.85
  -4  -4  -6 1181.87   35.48
  -4   4  -6 1239.61   33.90
  -4   5  -6   93.42    9.88
   4   5  -6  106.25    9.40
   4   5   6   94.01    9.47
   4  -5   6  148.47   10.64
   4   5  -6   92.60    9.41
   4  -5  -6  106.73   11.05
  -4   5   6   91.77    9.81
  -4   5  -6  121.61   10.70
   4   5  -6   87.16    9.42
   4  -5   6  107.79   10.30
  -4   5  -6  124.62    8.52
  -4  -5  -6  143.26   12.27
   4  -5  -6  111.96    9.70
  -4  -6  -6  484.04   20.21
  -4   6  -6  471.56   20.96
   4  -6  -6  469.18   19.01
   4   6  -6  492.78   19.54
  -4   6   6  471.47   21.11
   4   6  -6  476.42   21.49
   4   6  -6  467.92   20.67
   4  -6   6  452.93   20.24
  -4  -6  -6  464.94   21.24
  -4   6  -6  491.28   21.77
   4  -6  -6  487.40   21.65
   4   6   6  500.38   21.64
   4  -6   6  513.29   21.74
  -4  -6   6  522.42   23.25
  -4  -7  -6   16.31    8.35
  -4  -7  -6   36.19   10.60
  -4   7   6    9.12    8.81
  -4  -7   6   28.66   10.55
   4   7  -6   26.33    9.34
   4  -7   6   46.40   10.37
   4   7   6   24.69    9.06
  -4   7  -6   30.45    9.60
   4   7  -6   22.10    8.96
   4  -7  -6   32.40    9.99
  -4   7  -6   22.68    8.85
   4   8  -6  305.66   21.63
  -4   8  -6  321.11   21.18
  -4  -8  -6  268.55   20.50
   4   8   6  289.95   20.56
   4  -8  -6  308.31   20.48
  -4  -8   6  281.81   20.67
  -4   8  -6  315.05   21.26
  -4   8   6  301.35   20.70
   4   8  -6  325.56   20.84
  -4   0  -7  378.30   14.60
  -4   0  -7  339.69   15.06
   4   0  -7  336.72   11.72
  -4   0  -7  332.11   11.66
   4   0  -7  364.80   15.80
  -4   0   7  333.91   12.90
  -4   0   7  399.53   16.45
   4   0  -7  377.35   14.73
   4   0   7  335.73   14.74
  -4   0  -7  341.18   14.11
   4  -1   7   61.56    6.67
   4  -1  -7   65.02    6.67
   4  -1  -7   71.84    8.75
  -4   1  -7   47.37    6.74
   4   1  -7   62.16    5.95
   4   1   7   49.61    6.92
  -4   1   7   61.59    6.49
  -4  -1  -7   64.95    5.86
   4  -1   7   51.78    6.93
  -4  -1   7   64.64    5.89
  -4  -1   7   68.31    8.73
  -4  -1  -7   61.36    6.99
   4   1  -7   45.99    7.17
   4   1  -7   58.80    7.03
  -4  -1  -7   58.01    7.65
  -4   1   7   74.29    8.25
  -4   1  -7   47.23    6.82
  -4   1  -7   40.52    5.32
  -4  -1  -7   62.29    6.52
  -4  -2  -7   50.39    7.41
   4  -2   7   54.37    6.45
   4   2  -7   54.80    7.69
  -4  -2  -7   52.88    7.55
  -4   2  -7   54.91    7.40
  -4  -2   7   67.94    9.00
   4   2  -7   60.84    6.68
  -4   2  -7   49.61    7.37
  -4  -2   7   70.20    8.32
   4  -2  -7   74.49    6.71
  -4   2  -7   64.52    6.91
   4  -2  -7   68.81    8.45
   4  -2   7   56.75    7.39
  -4   2   7   49.39    7.23
  -4   2   7   54.67    6.69
   4   2  -7   62.80    7.71
  -4  -2  -7   55.67    5.73
   4   2   7   52.63    6.92
  -4   3  -7    0.44    5.22
  -4  -3  -7    2.96    5.63
   4   3  -7    0.35    4.97
   4  -3   7   -2.16    5.03
   4   3  -7    3.47    5.82
   4  -3   7    4.79    5.38
   4   3   7   -1.11    5.59
  -4   3   7    4.55    5.41
  -4   3  -7    2.83    5.86
   4   3  -7    1.04    5.80
  -4  -3  -7    3.11    5.77
   4  -3  -7    0.39    5.76
   4  -3  -7    2.03    5.89
  -4  -3   7   -4.58    6.01
  -4   3  -7    0.34    5.34
   4  -4  -7  148.50   12.80
   4   4  -7  142.90   11.28
  -4  -4  -7  133.05   11.32
   4  -4  -7  125.66   12.15
  -4   4   7  122.22   10.72
  -4   4  -7  173.96   13.45
  -4   4  -7  117.57   10.78
   4   4  -7  136.99   10.49
   4  -4   7  150.34   11.18
   4   4  -7  111.21   10.46
  -4  -4   7  135.43   12.53
  -4   4  -7  113.36    9.59
   4  -4   7  156.20   11.35
  -4  -4  -7  121.53   10.60
   4   4   7  139.74   11.96
   4   5   7  133.67   12.03
   4  -5  -7  137.23   13.45
   4   5  -7  131.39   11.73
  -4   5   7  139.72   12.39
  -4   5  -7  139.68   10.55
  -4   5  -7  139.90   12.75
  -4  -5  -7  117.70   11.08
  -4  -5   7  150.47   14.01
   4  -5   7  140.10   11.55
   4  -5  -7  133.27   11.27
  -4  -5  -7  151.54   13.38
  -4   5  -7  139.59   11.63
   4   5  -7  126.76   11.87
  -4  -6  -7  120.83   11.89
  -4  -6  -7   93.74   12.31
   4   6   7   73.88   10.71
   4  -6   7  111.52   14.38
   4  -6  -7  104.06   10.97
  -4  -6   7  108.38   13.57
   4   6  -7   80.22   11.24
  -4   6   7  103.02   11.90
   4   6  -7   96.09   11.04
   4  -6  -7  111.62   12.38
   4   6  -7   92.20   11.78
  -4   6  -7   96.26   11.43
  -4   6  -7  108.01   12.65
   4  -7  -7    2.71    9.55
  -4   7  -7    1.75    9.59
  -4  -7  -7    0.81    9.79
  -4  -7   7    3.44   10.18
  -4   7   7   10.89   10.15
   4   7  -7   -0.27    9.13
  -4  -7  -7    4.60    8.89
   4   7  -7    6.16   10.10
   4   7   7    2.32    9.48
  -4   7  -7   -0.81    9.40
   4  -8  -7   29.04   12.98
  -4  -8   7   20.25   12.78
   4   8  -7   17.42   15.96
  -4  -8  -7   11.51   12.67
   4   8   7   10.69   11.99
  -4   8   7   23.42   12.27
  -4   8  -7   12.26   14.96
  -4   0   8 1515.25   41.32
  -4   0  -8 1544.19   44.13
  -4   0  -8 1508.86   43.08
   4   0  -8 1516.29   43.38
  -4   0  -8 1529.70   43.25
   4   0   8 1534.94   43.68
   4   0  -8 1601.02   44.99
  -4   0   8 1559.34   45.23
  -4   1  -8  430.44   18.69
   4   1   8  446.14   18.24
  -4   1  -8  434.00   17.90
  -4   1   8  473.16   19.63
   4   1  -8  416.99   15.40
   4  -1  -8  428.41   19.10
  -4   1  -8  424.16   15.29
   4  -1   8  441.56   17.11
   4   1  -8  439.91   18.91
  -4   1   8  401.67   16.64
  -4  -1   8  443.84   19.37
  -4  -1  -8  451.06   17.01
   4   1  -8  445.11   18.40
   4  -1  -8  439.15   17.05
  -4  -1   8  449.03   15.79
   4  -1   8  411.07   17.81
  -4  -1  -8  448.40   17.89
  -4  -1  -8  457.23   19.08
  -4  -2  -8  342.41   14.15
  -4   2   8  345.20   15.59
  -4   2  -8  345.59   16.77
   4   2  -8  355.88   17.25
   4   2   8  370.40   16.68
   4  -2   8  338.84   15.24
  -4   2  -8  319.03   16.85
  -4   2  -8  355.03   14.82
   4  -2  -8  353.91   14.63
  -4  -2   8  369.75   18.52
   4  -2   8  360.07   16.33
  -4  -2  -8  353.37   16.99
  -4  -2  -8  359.20   16.61
  -4   2   8  343.48   17.19
   4   2  -8  367.83   15.05
   4   2  -8  338.98   17.06
   4  -2  -8  350.87   17.89
   4  -3   8  207.18   12.70
  -4   3  -8  192.97   14.05
   4  -3   8  173.75   13.24
   4   3  -8  206.38   14.56
  -4   3   8  181.98   13.24
  -4   3  -8  218.09   13.28
  -4   3  -8  193.98   15.01
  -4  -3   8  190.69   14.74
   4   3   8  201.69   14.16
   4  -3  -8  184.12   14.14
   4   3  -8  176.42   12.77
   4   3  -8  196.34   13.95
  -4  -3  -8  168.38   13.17
   4  -3  -8  192.22   14.34
  -4  -3  -8  187.87   14.24
  -4   4   8 1041.02   33.40
   4   4  -8 1046.04   35.19
   4  -4  -8  972.70   34.50
  -4  -4   8 1070.52   35.67
  -4   4  -8 1049.19   32.53
   4   4  -8 1018.37   33.36
  -4  -4  -8 1005.33   33.59
  -4   4  -8 1004.96   34.27
   4  -4   8 1015.51   32.43
  -4  -4  -8 1011.41   34.15
   4   4  -8 1063.77   32.78
   4   4   8 1021.13   34.19
   4  -4  -8 1078.08   33.99
   4  -5  -8  462.23   21.12
  -4  -5  -8  472.53   22.77
  -4   5  -8  432.73   22.26
   4   5  -8  459.73   21.44
  -4  -5   8  427.21   23.32
  -4   5  -8  437.74   20.02
   4   5  -8  476.39   23.12
   4   5  -8  470.84   21.36
  -4   5  -8  449.27   21.11
   4   5   8  474.13   22.16
   4  -5   8  439.99   20.42
  -4  -5  -8  507.94   22.33
  -4   5   8  479.70   22.01
   4  -5  -8  454.53   22.79
   4  -6  -8   84.62   11.77
  -4  -6  -8   86.22   11.78
  -4  -6   8   98.41   14.25
   4   6  -8   94.41   13.52
   4   6  -8   77.13   11.97
   4   6   8   81.13   12.62
  -4  -6  -8   94.51   12.95
  -4   6  -8   81.02   12.72
  -4   6   8   91.35   13.06
  -4   6  -8   75.56   11.55
   4   6  -8   81.80   12.00
   4  -6  -8   81.15   13.44
   4   7   8   41.61   16.59
  -4  -7   8   60.28   14.18
  -4   7   8   57.19   15.17
   4  -7  -8   57.67   23.65
  -4  -7  -8   33.42   12.05
  -4   7  -8   52.35   12.32
  -4  -7  -8   58.26   12.41
   4   7  -8   54.00   12.47
  -4   0  -9   25.35    8.56
   4   0   9   18.88    7.68
  -4   0   9   16.65    8.24
  -4   0  -9   18.14    7.88
  -4   0   9   19.46    6.58
  -4   0  -9   22.04    9.40
   4   0  -9   19.63    8.34
   4   0  -9   19.08    8.80
  -4   1  -9   19.46    8.32
  -4  -1   9   21.59    8.88
  -4   1   9   22.95    7.31
  -4   1  -9   20.42    7.96
   4  -1  -9   18.78    7.48
   4   1  -9   18.46    8.02
   4  -1   9   25.70    7.64
   4  -1   9   27.38    7.74
  -4  -1  -9   17.92    8.01
   4   1  -9   20.65    8.01
  -4  -1  -9   33.26    7.89
   4  -1  -9   25.98    9.18
   4   1   9   27.69    8.17
  -4   1   9   18.08    8.27
  -4  -1  -9   35.56    9.58
   4  -2   9  674.65   24.63
   4  -2  -9  650.91   26.08
  -4   2  -9  696.81   25.46
   4   2  -9  630.62   25.30
  -4   2   9  681.86   24.17
   4   2   9  595.31   24.65
   4  -2  -9  665.73   26.50
   4   2  -9  671.40   25.51
  -4   2  -9  640.89   25.19
  -4  -2  -9  660.60   24.84
   4  -2   9  639.59   27.80
  -4  -2  -9  637.00   25.69
  -4  -2   9  664.65   26.54
  -4   3  -9  184.20   13.60
  -4  -3   9  175.31   15.46
   4  -3   9  159.50   12.77
  -4   3   9  151.48   12.81
  -4   3  -9  158.45   13.96
   4  -3  -9  181.99   14.47
  -4  -3  -9  168.71   13.91
   4   3  -9  154.76   13.55
  -4   3  -9  181.86   14.07
   4   3  -9  166.92   14.37
   4   3   9  160.76   13.64
  -4  -3  -9  192.21   14.87
   4  -3  -9  157.62   14.31
   4  -4   9   18.78    9.04
   4  -4  -9    4.45    9.02
   4   4  -9    1.59    8.95
   4  -4  -9    7.71    9.56
  -4  -4   9   18.17   10.64
   4   4   9    4.00    8.74
   4   4  -9    2.13    8.74
  -4   4  -9    6.03    8.93
   4   4  -9   14.31    9.65
  -4   4  -9    7.14    9.09
  -4   4  -9    7.41    8.63
  -4  -4  -9    8.26    9.38
  -4   4   9    3.89    8.56
  -4  -4  -9   11.36    9.05
   4  -5  -9    0.38   10.70
   4   5  -9   -2.81   10.09
  -4  -5  -9    3.35    9.55
  -4   5   9    5.62    9.89
   4  -5  -9    8.21    9.78
  -4  -5  -9   -3.28    9.82
   4   5  -9   -0.57    9.67
  -4   5  -9    1.32    9.74
  -4  -5   9    3.51   11.17
  -4   5  -9    7.16   10.17
   4   5   9    1.28    9.80
   4   5  -9    3.38   10.35
  -4  -6   9  391.17   25.18
   4   6  -9  393.34   22.96
  -4  -6  -9  366.73   23.29
   4  -6  -9  414.28   26.30
   4   6   9  383.68   27.41
  -4   6  -9  368.02   23.27
  -4  -6  -9  383.03   23.56
   4  -6  -9  396.81   23.74
   4   6  -9  431.98   32.36
  -4   6   9  412.94   24.21
  -4   6  -9  376.43   23.74
   4   0 -10    0.64    8.77
  -4   0 -10   -0.56    8.86
  -4   0 -10    5.58    8.99
   4   0  10    8.20    8.80
   4   0 -10    8.12    9.71
  -4   0  10   10.41    9.58
  -4   0 -10   -0.71    8.34
  -4  -1  10   39.34   10.93
   4   1  10   38.40    9.70
  -4   1 -10   31.63    9.89
   4   1 -10   31.61   10.04
  -4   1  10   34.91    8.93
   4   1 -10   29.26   10.44
  -4  -1 -10   32.59   10.55
  -4   1  10   27.54    9.99
   4  -1 -10   37.93   10.66
  -4   1 -10   29.28   10.22
   4  -1  10   32.94    9.45
  -4  -1 -10   37.66   10.64
   4   2 -10    5.06    9.48
  -4  -2  10   22.20   10.65
  -4  -2 -10   23.58   10.38
   4   2  10   12.04    9.54
   4  -2  10   19.11    9.14
   4   2 -10   10.18    9.40
   4  -2 -10    7.84    9.89
  -4  -2 -10   18.47    9.93
  -4   2  10   10.99    8.73
  -4   2 -10   14.74    9.82
  -4   2 -10    9.11    9.38
   4  -2 -10    2.49    9.51
   4   3 -10   -2.38   10.19
  -4   3 -10    0.29    9.59
   4  -3 -10    6.01   10.21
   4   3  10    4.22   10.15
  -4  -3 -10    1.83    9.84
  -4  -3 -10    4.27    9.97
   4  -3 -10    8.55   10.42
  -4   3  10   -0.96    9.70
  -4   3 -10    7.50   10.10
   4   3 -10    2.15   10.00
  -4  -3  10    2.32   10.91
   4  -3  10    4.85    9.40
   4   4 -10   -1.43   10.86
  -4  -4 -10    3.81   10.10
   4  -4 -10    0.59   10.78
   4   4 -10   -0.87   10.80
   4   4  10    0.47   10.71
  -4  -4 -10    7.51   10.75
   4  -4 -10    0.35   11.24
  -4   4 -10    0.04   10.30
  -4  -4  10    5.01   12.02
  -4   4  10    3.66    9.89
  -4   4 -10   -2.67   10.23
  -4   5 -10   18.55   11.72
   4  -5 -10   29.06   14.23
  -4  -5 -10   10.47   12.67
   4   5 -10   27.63   12.67
  -4  -5 -10   33.64   12.80
   4   5 -10   31.33   11.92
   4  -5 -10   18.47   12.57
  -4   0 -11   31.64   12.14
   4   0  11   31.79   11.17
  -4   0  11   31.42   11.91
   4   1  11    1.42   10.63
   4   1 -11    8.58   10.98
  -4  -1 -11    3.85   11.48
   4   1 -11    0.19   16.48
  -4   1 -11   13.13   11.76
  -4  -1  11    3.47   10.94
   4  -1 -11    1.21   12.25
   4  -1  11    0.18   10.32
  -4   1 -11    2.76   10.40
  -4   2 -11  302.36   21.74
   4   2  11  277.31   20.23
  -4   2 -11  272.68   21.13
   4  -2 -11  290.85   24.06
   4   2 -11  281.36   21.51
  -4  -2 -11  295.75   22.70
  -4  -2 -11  235.91   19.23
  -4  -2  11  285.74   21.28
   4  -2 -11  292.98   21.77
   5   0   0    5.62    1.71
  -5   0   0    3.73    1.69
  -5   0   0    5.77    1.37
   5   0   0    6.77    1.60
  -5   0   0    3.79    1.42
  -5   0   0    6.49    1.66
   5   0   0    5.53    1.65
  -5   0   0    6.38    2.06
   5   0   0   10.36    1.91
   5   0   0    4.04    1.74
  -5   1   0   -5.76    2.06
  -5  -1   0   -8.79    1.42
   5   1   0  -10.34    1.40
   5  -1   0   -4.81    1.41
   5   1   0   -8.30    1.92
  -5   1   0   -7.22    1.57
  -5  -1   0   -5.21    1.60
   5  -1   0   -9.77    1.43
   5   1   0   -9.88    2.18
  -5   1   0   -6.16    1.63
  -5  -1   0   -7.71    1.91
   5  -1   0   -1.57    1.82
  -5   1   0   -5.48    1.69
   5   1   0   -6.91    1.62
   5   1   0   -7.38    1.36
   5  -1   0   -7.59    2.30
   5  -1   0   -7.88    1.48
  -5  -1   0   -2.89    1.93
   5   1   0   -6.58    1.53
  -5   1   0   -5.84    1.21
   5   2   0   12.09    1.84
   5  -2   0   14.04    1.95
   5   2   0   13.38    2.30
   5  -2   0    9.62    1.92
   5  -2   0    7.99    1.62
   5   2   0    8.85    2.88
   5   2   0   17.87    3.44
  -5   2   0   12.91    2.14
  -5   2   0   10.39    1.72
   5  -2   0   10.99    2.26
   5   2   0    9.71    2.02
  -5   2   0   12.12    2.53
  -5  -2   0   11.05    1.93
  -5  -2   0    9.63    2.38
  -5   2   0   10.21    2.05
  -5  -2   0   11.01    2.46
   5  -2   0    7.61    2.17
   5  -2   0   13.50    3.26
   5   2   0   10.12    2.08
  -5  -2   0   15.38    3.07
  -5   3   0    3.35    2.23
   5   3   0   -0.65    2.23
   5   3   0    2.88    2.10
   5  -3   0   -1.41    1.21
  -5  -3   0   -0.60    2.67
  -5   3   0   -3.27    2.48
  -5   3   0   -1.94    2.21
   5   3   0    0.28    2.90
  -5  -3   0   -3.03    2.70
   5   3   0   -2.18    2.04
   5   3   0   -2.99    1.99
   5  -3   0   -2.39    1.93
  -5   3   0   -2.68    2.35
  -5  -3   0   -0.61    2.21
  -5  -3   0   -4.37    2.19
   5  -3   0   -2.89    2.31
   5  -3   0   -2.86    2.59
  -5   3   0   -1.18    1.23
   5  -4   0    8.62    3.30
  -5   4   0    8.19    3.11
   5   4   0   10.42    3.13
  -5   4   0    5.33    3.80
   5  -4   0    9.95    3.25
   5   4   0    7.12    4.09
   5   4   0    3.90    2.50
  -5  -4   0    4.73    3.65
  -5   4   0    6.63    3.50
   5   4   0   13.63    3.18
  -5  -4   0    0.83    3.01
  -5  -4   0    4.82    3.02
  -5   4   0    9.37    2.75
  -5   5   0    2.29    3.08
  -5   5   0   -0.89    4.00
   5   5   0    5.65    3.43
  -5  -5   0   -0.23    3.23
  -5  -5   0    4.70    4.83
   5   5   0    2.05    3.48
  -5   5   0    3.99    3.40
   5   5   0    2.97    3.27
   5  -5   0    6.24    3.70
  -5  -6   0   11.02    4.10
   5   6   0   16.33    4.87
   5   6   0    8.33    4.25
   5  -6   0   10.29    4.98
  -5   6   0    4.71    5.54
  -5   6   0   13.50    4.83
   5   6   0   13.97    4.83
  -5   6   0    5.20    4.16
  -5  -6   0   12.28    6.38
   5   7   0    5.36    5.42
   5   7   0    3.32    5.59
  -5  -7   0    1.04    4.51
  -5  -7   0    3.86    7.27
  -5   7   0   -0.58    5.00
  -5   7   0   -1.87    5.28
   5  -7   0   -1.52    5.86
   5   7   0    1.62    4.98
  -5  -8   0    3.98    8.38
  -5   8   0    3.01    6.86
   5  -8   0    6.08    7.62
   5   8   0    6.90    6.69
   5   8   0    7.54    7.19
   5   8   0    5.66    6.80
  -5   8   0    6.84    8.35
  -5   9   0    2.16   10.10
  -5  -9   0   12.00   10.12
   5   9   0    2.34    8.59
   5   9   0    4.93    8.68
   5  -9   0   -5.57    9.28
  -5   9   0    7.84    8.63
  -5  10   0    9.38   10.60
   5  10   0    4.44   10.37
  -5 -10   0    5.04   12.86
   5 -10   0    5.02   11.33
  -5  10   0    0.04   12.61
  -5   0  -1 1996.52   48.57
  -5   0  -1 2002.21   47.66
   5   0   1 2048.06   48.98
  -5   0  -1 2053.37   49.31
  -5   0  -1 1954.79   48.78
   5   0  -1 1958.99   49.33
   5   0   1 1931.05   48.48
  -5   0   1 1926.09   47.93
  -5   0   1 2022.26   47.50
   5   0   1 1946.58   49.24
  -5   0   1 1976.06   48.74
   5   0   1 1945.43   47.91
   5   0  -1 1966.13   47.92
  -5   0   1 1963.12   49.21
   5   0  -1 1930.32   48.62
   5   0  -1 2039.16   47.55
  -5   0   1 2029.27   49.15
   5   0   1 1922.65   47.62
  -5   1   1    1.22    1.25
  -5   1  -1    2.05    1.66
  -5   1   1    1.45    1.33
   5   1  -1    0.93    1.60
  -5   1  -1    1.57    1.51
  -5  -1  -1    2.56    1.36
   5   1   1    0.67    1.88
  -5  -1  -1   -0.35    1.70
  -5   1   1    8.59    1.92
   5   1   1   -0.13    1.37
   5   1   1   -0.44    1.49
  -5  -1  -1    0.01    1.52
   5  -1   1    1.04    1.73
   5   1  -1    2.68    2.69
  -5   1  -1   -0.68    1.25
   5  -1  -1    0.92    1.77
  -5  -1   1    2.10    2.08
  -5   1   1   -0.47    1.49
   5   1  -1   -0.58    1.62
   5  -1   1    3.44    1.90
   5  -1  -1    1.91    1.94
  -5  -1  -1    2.62    1.49
  -5   1   1    0.75    1.56
   5   1  -1    1.42    0.96
   5  -1   1   -0.34    1.31
   5   1   1    1.97    1.69
   5   1  -1    4.16    1.63
  -5  -1   1    1.93    1.78
   5  -1  -1    0.90    1.47
   5   1  -1    4.18    2.51
   5  -1   1   -0.21    1.75
   5  -1  -1   -0.47    1.58
  -5  -1   1    2.46    1.73
  -5   1  -1    0.37    2.75
  -5  -1  -1   -0.30    1.70
   5   1   1    2.57    1.62
   5  -2  -1  314.45   10.03
  -5  -2   1  309.20   11.14
  -5   2   1  327.95    9.57
   5   2   1  322.15    9.77
   5   2   1  318.70   10.56
   5   2  -1  322.86    8.59
   5  -2   1  319.37    8.93
  -5  -2   1  341.29   10.62
   5   2   1  338.19    9.82
   5  -2   1  311.80   11.42
  -5   2   1  307.34   10.39
   5  -2   1  317.24   10.25
   5  -2  -1  311.66   10.00
   5  -2  -1  345.42   10.90
  -5   2   1  331.45    9.66
  -5  -2  -1  343.61   10.77
  -5  -2   1  320.33    8.63
  -5  -2  -1  317.24   10.09
   5  -2  -1  322.25    9.37
  -5  -2  -1  302.37   10.27
   5  -2   1  321.56   10.40
   5   2  -1  312.70   10.86
  -5   2  -1  316.35    9.04
   5   2   1  318.07   10.63
  -5  -2  -1  316.13   10.31
  -5  -2  -1  334.66    9.62
   5  -2   1  323.97   11.50
   5   2  -1  329.92   10.44
   5  -2  -1  313.14    9.61
   5   2   1  329.26    9.98
  -5   2   1  324.98    9.42
   5  -2  -1  322.52    9.77
  -5   2  -1  316.98    8.82
   5  -2   1  317.70    8.89
   5   2  -1  309.72   10.02
   5   2  -1  321.50   11.85
  -5  -2   1  311.23   10.23
  -5   2  -1  321.39   10.26
   5   2  -1  309.30   10.12
   5   3   1  539.45   16.61
  -5   3  -1  544.20   15.44
   5  -3  -1  572.43   16.56
   5   3  -1  574.48   16.43
   5   3  -1  523.60   16.76
  -5  -3  -1  562.20   17.62
   5   3  -1  558.88   14.86
   5  -3  -1  539.25   15.83
   5   3   1  522.78   15.46
  -5   3   1  568.94   15.48
   5   3   1  555.65   16.08
   5   3   1  582.38   15.86
  -5   3   1  563.49   16.96
   5  -3   1  569.61   15.58
  -5  -3   1  591.32   16.48
   5  -3  -1  527.34   15.43
   5  -3  -1  570.90   14.86
  -5   3  -1  592.74   17.61
  -5  -3  -1  604.16   17.52
  -5  -3   1  558.81   14.82
   5   3   1  558.51   15.74
   5  -3   1  550.39   13.94
   5  -3  -1  564.07   16.39
   5  -3  -1  552.11   14.72
   5  -3   1  533.71   16.48
  -5  -3  -1  553.00   16.23
  -5   3   1  562.40   15.69
  -5  -3   1  587.77   17.93
  -5   3  -1  565.23   16.35
  -5  -3  -1  531.27   15.79
   5   3  -1  570.42   17.70
  -5  -3   1  563.97   16.78
  -5  -4   1 1009.12   29.21
   5   4  -1  988.41   25.83
   5  -4   1  983.87   26.94
   5   4  -1  998.86   27.35
  -5   4   1  997.62   28.19
   5   4   1 1013.70   26.74
  -5   4  -1  983.92   27.35
   5  -4  -1 1089.09   27.98
  -5   4   1  998.78   26.48
   5   4   1  975.31   26.23
   5  -4  -1  954.13   24.70
  -5   4  -1  932.30   26.72
   5   4   1 1026.15   27.09
  -5   4  -1  977.00   28.24
   5   4  -1  971.06   27.56
  -5  -4  -1 1021.34   27.23
  -5  -4   1 1020.58   27.03
  -5   4  -1  982.91   27.19
  -5   4   1  983.12   26.11
   5   4   1 1046.46   26.55
  -5  -4   1  932.33   25.69
   5  -4  -1  974.65   24.69
  -5  -4  -1  990.40   28.69
   5   4  -1 1018.22   27.47
   5   5  -1  115.22    8.22
   5   5   1   97.69    6.48
   5   5  -1   98.93    7.28
   5   5  -1  100.26    7.10
   5   5   1   96.86    6.56
   5  -5  -1  106.74    7.61
   5   5   1   98.31    7.04
  -5   5  -1  102.72    7.34
  -5  -5  -1  110.39    7.13
   5  -5  -1   89.77    6.10
   5  -5  -1   93.83    4.09
  -5   5   1   96.20    5.90
  -5   5  -1  115.60    8.92
  -5  -5  -1  107.27    9.19
  -5  -5   1  104.03    6.80
  -5  -5   1   84.12    8.16
   5   5   1  109.80    7.30
   5  -5  -1   92.32    3.91
  -5   5  -1  105.96    7.76
  -5  -5   1   90.92    6.50
  -5   5   1  104.13    7.18
   5  -5   1   96.67    7.36
  -5  -6  -1  116.22    7.97
   5  -6   1   77.70    7.81
   5   6  -1   94.98    7.72
  -5  -6   1   91.54    9.15
  -5   6   1  115.00    8.25
  -5   6   1   68.51    7.54
   5   6   1  100.51    7.95
  -5   6  -1   90.43    9.13
   5   6  -1  109.84    8.89
  -5   6  -1  102.52    7.90
  -5  -6   1   97.25    7.40
  -5  -6  -1   96.19    9.53
   5   6   1   93.50    7.11
   5   6  -1  101.63    7.49
  -5   6  -1   77.33    7.59
   5  -6  -1   98.75    8.79
  -5   6   1   99.54    6.89
   5   6   1  110.87    8.32
   5  -7   1  497.28   19.68
  -5  -7   1  485.36   21.72
  -5   7   1  487.47   16.28
  -5   7  -1  506.44   18.42
   5   7   1  489.37   16.86
   5   7  -1  495.84   18.35
  -5  -7  -1  494.45   17.47
   5   7   1  504.18   18.79
  -5   7   1  486.04   18.41
  -5  -7  -1  502.51   21.28
  -5   7   1  487.25   20.31
   5   7   1  492.57   18.51
   5  -7  -1  457.69   19.37
  -5  -7   1  503.66   16.68
   5   7  -1  503.66   17.98
  -5   7  -1  511.92   20.64
  -5   8  -1  227.32   14.95
   5  -8   1  240.72   19.16
  -5   8   1  250.94   17.19
  -5  -8   1  237.32   17.94
  -5  -8  -1  248.38   17.22
  -5   8   1  247.28   14.71
   5   8   1  244.10   14.87
   5   8  -1  204.91   14.80
   5   8   1  208.68   15.50
   5   8  -1  236.48   14.61
   5   8  -1  238.29   14.15
  -5   8  -1  236.51   14.47
   5  -8  -1  236.02   15.35
  -5   8  -1  234.04   16.58
  -5   9  -1  231.95   17.62
  -5  -9   1  251.28   19.02
  -5   9   1  212.76   15.13
   5  -9   1  242.81   17.65
  -5  -9  -1  214.74   18.04
   5   9   1  225.25   15.86
   5   9  -1  194.91   15.49
   5  -9  -1  238.01   17.86
  -5   9   1  224.36   17.29
   5   9   1  205.29   15.12
  -5   9  -1  227.39   16.58
   5  10   1   25.45   11.23
  -5  10  -1   47.32   14.01
  -5 -10   1   22.39   12.93
  -5  10  -1   34.53   11.83
   5 -10  -1   37.90   12.75
   5  10  -1   25.63   11.39
  -5  10   1   36.90   12.04
  -5  10   1   42.28   14.21
   5  10   1   31.21   11.63
   5 -10   1   33.99   13.15
  -5   0  -2 5256.19  130.01
   5   0   2 5352.29  127.75
  -5   0  -2 5492.64  132.02
  -5   0   2 5436.91  130.14
   5   0  -2 5401.44  127.75
   5   0  -2 5588.97  132.17
  -5   0  -2 5619.74  130.09
   5   0  -2 5167.54  129.99
   5   0  -2 5475.18  128.52
   5   0  -2 5520.94  127.47
  -5   0  -2 5527.22  130.02
   5   0   2 5191.08  129.91
   5   0  -2 5424.19  131.68
  -5   0   2 5420.96  128.59
   5   0  -2 5409.51  132.83
  -5   0   2 5336.63  131.90
  -5   0  -2 5513.80  127.76
   5   0   2 5352.17  132.53
   5   0   2 5639.00  130.34
   5   1   2 1859.33   46.31
   5   1   2 1848.27   46.40
   5  -1   2 1835.89   47.04
  -5  -1  -2 1858.20   44.69
  -5   1  -2 1878.51   45.42
   5  -1   2 1864.19   46.99
   5   1  -2 1871.43   47.10
   5   1   2 1828.22   45.96
  -5  -1  -2 1886.43   46.36
  -5  -1   2 1737.68   45.19
   5  -1   2 1857.72   45.40
   5   1   2 1799.36   46.30
  -5  -1  -2 1926.49   46.46
  -5   1   2 1893.25   46.95
   5  -1   2 1824.48   45.65
  -5  -1   2 1839.15   47.58
   5   1  -2 1852.81   47.69
  -5   1  -2 1822.76   46.90
  -5  -1  -2 1901.78   46.12
   5  -1  -2 1846.79   45.64
  -5   1   2 1880.53   46.10
  -5  -1   2 1909.04   46.48
   5  -1  -2 1819.54   44.60
  -5  -1  -2 1797.99   46.16
  -5   1  -2 1882.31   45.75
  -5   1   2 1842.53   46.07
   5  -1  -2 1847.53   46.13
   5   1   2 1822.98   44.74
  -5   1  -2 1790.92   47.00
  -5   1   2 1906.07   45.79
   5   1  -2 1882.35   46.53
  -5   1   2 1848.50   44.53
   5   1  -2 1920.05   45.47
   5  -1  -2 1791.85   46.85
  -5  -2   2 2337.53   59.94
  -5  -2  -2 2394.92   58.85
   5  -2  -2 2336.13   58.77
   5   2   2 2301.31   58.98
   5   2   2 2456.93   59.05
  -5   2  -2 2412.47   57.75
   5   2   2 2277.11   59.34
   5   2  -2 2348.34   60.96
   5   2   2 2397.95   57.29
   5  -2  -2 2334.47   59.62
   5  -2   2 2340.37   59.93
   5   2   2 2358.41   58.78
   5   2  -2 2207.54   58.94
   5  -2  -2 2323.11   56.96
  -5   2  -2 2352.14   58.41
   5  -2   2 2347.76   57.67
  -5  -2   2 2346.62   58.02
  -5   2   2 2411.88   58.89
  -5  -2  -2 2494.41   59.64
  -5   2  -2 2354.45   57.44
   5  -2  -2 2385.51   58.58
  -5  -2  -2 2435.74   58.77
  -5   2   2 2421.14   56.94
   5  -2   2 2348.87   58.15
   5  -2   2 2378.36   57.62
  -5  -2   2 2469.15   59.04
   5   2  -2 2379.82   60.16
  -5   2   2 2360.78   58.49
   5  -2  -2 2402.74   58.28
  -5   2  -2 2375.89   60.00
   5  -2  -2 2460.75   58.55
  -5   2   2 2438.12   59.66
   5  -2   2 2378.33   59.76
  -5  -2   2 2496.89   60.93
   5  -3  -2 1393.26   35.87
   5   3   2 1384.79   35.30
  -5  -3  -2 1379.73   36.15
   5  -3  -2 1360.78   34.05
  -5  -3  -2 1367.89   34.02
  -5   3  -2 1369.32   35.84
  -5  -3   2 1340.61   32.55
   5   3   2 1335.99   34.21
   5  -3  -2 1314.98   33.91
  -5   3   2 1365.25   33.51
   5  -3  -2 1374.30   33.99
   5  -3   2 1306.83   33.03
  -5  -3  -2 1326.54   33.85
  -5   3  -2 1302.37   33.91
   5   3  -2 1352.50   35.90
   5  -3  -2 1373.78   33.99
  -5  -3   2 1398.41   37.16
   5   3  -2 1314.56   34.89
   5  -3   2 1339.34   34.30
  -5  -3   2 1343.66   34.99
   5   3   2 1343.26   33.78
  -5   3  -2 1345.60   33.12
   5   3  -2 1283.06   35.55
  -5   3   2 1342.09   33.88
  -5   3  -2 1331.09   34.90
   5  -3   2 1324.93   36.69
  -5  -3  -2 1371.22   35.25
   5   3  -2 1302.42   32.68
   5   4  -2 3016.30   73.89
  -5  -4  -2 2971.02   74.27
   5   4   2 2903.04   72.46
   5  -4  -2 2883.65   71.33
   5   4   2 2826.05   71.61
  -5   4   2 3069.44   71.45
   5   4   2 2944.30   70.63
   5   4  -2 2841.84   70.18
   5  -4  -2 2861.65   70.49
   5  -4  -2 2982.46   73.72
  -5  -4   2 2905.65   75.03
   5  -4   2 2906.44   74.20
  -5   4   2 2898.85   71.28
   5   4   2 2965.80   71.78
  -5   4  -2 2911.08   73.75
  -5  -4   2 2942.36   71.90
  -5   4  -2 2807.49   71.83
  -5   4   2 2859.85   73.15
   5  -4  -2 2785.53   70.45
  -5   4  -2 2812.34   69.09
  -5   4  -2 3123.73   70.27
  -5  -4  -2 2945.43   72.32
   5  -4  -2 2872.52   70.54
   5   4  -2 2875.60   71.95
   5  -4   2 2926.21   72.49
  -5  -4   2 2868.19   69.96
  -5   4  -2 2789.44   71.96
  -5  -5  -2  501.64   17.86
  -5   5  -2  473.83   16.73
  -5  -5   2  450.74   14.66
   5   5  -2  487.76   14.79
   5   5   2  463.78   14.21
  -5  -5  -2  487.83   16.05
  -5  -5   2  514.98   18.75
  -5   5   2  483.87   15.24
   5   5   2  488.03   16.71
   5   5  -2  493.61   16.82
  -5   5  -2  487.07   17.96
   5   5   2  486.40   15.67
   5  -5  -2  473.73   13.79
   5  -5   2  456.84   16.21
  -5   5   2  477.73   17.45
  -5   5   2  482.07   13.88
  -5   5  -2  482.68   16.94
   5   5  -2  478.87   16.79
  -5  -5   2  494.43   15.52
   5  -5  -2  517.09   17.39
  -5   6  -2  414.36   17.96
  -5   6  -2  443.77   16.96
  -5  -6   2  469.57   15.32
  -5  -6   2  480.97   19.22
   5   6   2  482.09   16.14
   5  -6  -2  450.26   17.82
  -5   6   2  462.35   13.61
   5   6   2  449.87   17.08
   5   6  -2  446.74   15.37
   5   6  -2  409.47   16.96
  -5   6  -2  455.77   17.42
  -5  -6  -2  440.68   18.47
   5   6   2  421.81   13.93
  -5  -6  -2  459.46   16.08
   5  -6   2  449.89   17.04
  -5   6   2  438.09   15.69
  -5   6   2  453.27   17.95
   5   6  -2  452.22   17.15
   5   7  -2  454.25   18.65
  -5   7  -2  532.40   20.98
  -5  -7   2  470.21   20.96
  -5  -7  -2  494.28   17.56
   5  -7   2  469.76   19.39
   5   7  -2  493.34   18.01
  -5  -7  -2  450.80   20.55
   5   7   2  526.35   18.42
  -5  -7   2  512.47   16.61
  -5   7   2  470.30   17.82
   5   7  -2  477.77   19.44
  -5   7  -2  503.13   19.08
   5  -7  -2  480.50   21.46
  -5   7  -2  451.95   19.30
  -5   7   2  465.55   20.13
   5   7   2  454.64   18.99
   5   8   2  429.86   20.03
  -5   8  -2  410.71   20.12
  -5   8  -2  462.56   20.20
  -5   8   2  448.22   18.80
   5   8  -2  473.60   20.58
  -5   8   2  464.22   21.09
  -5   8  -2  468.59   22.54
   5  -8  -2  446.44   20.45
  -5  -8   2  456.85   22.19
   5  -8   2  453.23   20.80
  -5  -8  -2  461.33   22.16
   5   8   2  439.41   18.80
  -5  -9  -2  109.03   14.93
  -5   9  -2  112.40   13.41
   5   9  -2  134.59   13.08
   5   9  -2  124.60   13.49
   5   9   2  127.97   12.78
  -5   9   2  122.46   12.32
  -5   9  -2  138.68   13.55
   5   9   2  124.72   13.14
  -5   9  -2  127.79   15.19
  -5   9   2  123.56   14.23
  -5  -9   2  115.45   14.06
   5  -9   2  117.32   13.78
   5  -9  -2  105.93   13.17
  -5 -10  -2   72.11   15.35
   5  10   2   79.46   13.97
  -5  10  -2   91.67   16.46
  -5  10  -2   76.91   13.57
  -5 -10   2   84.87   16.65
   5  10  -2   73.33   13.32
   5 -10  -2   88.36   15.25
  -5  10   2   75.82   18.15
   5   0  -3 1111.25   27.44
  -5   0   3 1076.99   29.03
  -5   0  -3 1072.56   27.69
   5   0   3 1101.94   29.17
   5   0  -3 1098.42   30.08
   5   0  -3 1131.66   27.67
  -5   0   3 1109.93   27.45
   5   0   3 1165.03   29.57
   5   0  -3 1088.22   29.24
  -5   0  -3 1067.41   28.94
   5   0  -3 1107.33   29.08
   5   0   3 1024.76   28.76
  -5   0  -3 1096.30   27.73
   5   0   3 1089.65   27.76
  -5   0  -3 1081.15   29.34
  -5   0  -3 1122.85   27.70
  -5   0   3 1094.44   29.92
  -5  -1   3   38.50    3.70
  -5  -1   3   37.12    3.74
  -5   1  -3   41.01    3.60
  -5  -1  -3   37.41    3.36
  -5  -1  -3   43.10    3.60
   5   1   3   37.05    3.59
   5  -1   3   38.86    4.83
  -5   1  -3   35.87    5.64
   5   1   3   40.18    3.74
   5  -1   3   50.36    4.27
   5   1   3   33.54    3.72
  -5  -1   3   38.26    4.63
   5  -1  -3   34.26    3.38
  -5  -1   3   39.00    4.35
   5  -1   3   38.67    3.89
   5   1   3   39.32    3.18
   5  -1  -3   41.33    3.16
   5   1  -3   38.38    2.18
   5   1  -3   57.92    4.60
  -5   1   3   42.97    3.60
  -5   1  -3   38.70    3.80
  -5   1   3   38.12    4.02
   5  -1   3   36.01    2.47
   5  -1  -3   78.45    6.02
  -5  -1  -3   30.30    3.67
  -5   1  -3   42.61    3.02
   5  -1  -3   41.52    4.36
   5  -1  -3   36.84    3.37
   5   1  -3   36.73    3.52
   5  -1   3   27.66    3.74
  -5  -1  -3   39.11    2.93
   5  -1  -3   39.88    3.09
   5  -1  -3   38.03    4.38
  -5   1  -3   47.18    4.32
   5   2   3  881.02   23.94
  -5   2  -3  841.22   21.93
   5  -2  -3  817.22   22.26
   5   2   3  819.13   23.59
  -5   2   3  844.57   21.38
   5  -2  -3  853.88   24.34
   5  -2  -3  833.91   21.55
  -5  -2   3  889.58   23.66
  -5  -2   3  876.41   25.47
   5  -2  -3  882.01   22.59
   5   2  -3  855.87   24.22
  -5  -2  -3  882.70   23.88
   5   2   3  850.61   21.92
   5  -2  -3  861.51   23.42
  -5   2  -3  840.08   22.67
  -5   2   3  849.16   24.17
   5  -2   3  861.83   24.77
   5   2  -3  898.05   23.38
  -5  -2  -3  846.89   22.55
   5  -2   3  832.45   22.59
  -5   2  -3  880.69   24.24
  -5   2   3  891.69   23.55
   5  -2   3  839.30   21.82
   5   2   3  790.32   21.65
   5   2   3  809.14   22.65
  -5   2  -3  885.04   23.33
  -5  -3  -3   10.97    3.32
  -5   3  -3    8.41    3.13
  -5  -3   3    6.19    3.97
   5   3  -3   22.85    4.20
  -5  -3   3   11.96    3.13
   5  -3  -3   11.85    3.73
   5  -3   3    9.66    2.70
  -5  -3  -3    6.23    3.19
   5  -3  -3   11.78    2.25
  -5   3  -3   26.39    4.35
  -5   3   3    9.14    3.43
   5  -3  -3   11.51    2.80
  -5   3   3   14.47    2.36
  -5   3  -3    8.20    2.49
   5   3   3    8.45    3.28
   5   3   3   13.06    2.73
   5  -3  -3   10.25    3.42
  -5  -3  -3    9.41    2.12
   5  -3  -3   10.63    2.28
   5   3   3    9.82    2.45
   5  -3   3   10.07    2.84
   5   3  -3    3.47    3.13
  -5   3  -3    7.88    3.03
   5   3   3   10.13    4.52
   5  -3   3   12.90    4.32
   5   4   3  270.84    8.96
  -5  -4   3  285.49   13.08
   5   4  -3  278.59   11.69
   5  -4   3  254.24    8.87
   5  -4   3  271.04   10.50
   5  -4  -3  271.11   10.00
  -5   4   3  289.09   11.91
  -5   4   3  274.06    8.12
   5  -4  -3  269.27   10.44
   5  -4  -3  277.30   10.70
   5   4   3  281.77    9.67
   5  -4  -3  258.76    8.38
  -5   4   3  267.13    9.14
  -5  -4   3  281.11    8.81
   5   4   3  269.56    9.07
   5   4   3  287.77   11.78
   5  -4  -3  285.10   11.83
   5   4  -3  258.59   11.36
  -5  -4  -3  265.94   10.21
  -5  -4   3  261.17    8.14
  -5  -4  -3  282.38   12.17
  -5   4  -3  259.69   10.74
  -5  -4   3  264.53   10.42
  -5   4  -3  274.98   11.65
  -5   4  -3  275.78    8.80
  -5   4  -3  277.01   11.48
   5  -4   3  283.49   13.02
  -5  -4  -3  266.46   11.15
  -5   5  -3   54.81    4.12
   5   5   3   55.80    6.95
  -5  -5  -3   65.28    7.58
  -5  -5  -3   53.79    6.18
  -5   5   3   58.06    3.70
  -5   5   3   59.85    7.30
   5   5  -3   80.95    7.70
  -5   5  -3   51.66    6.47
  -5  -5   3   61.48    5.75
  -5  -5   3   64.32    8.06
   5   5   3   57.85    5.42
   5  -5  -3   66.31    7.46
   5  -5   3   70.72    6.83
   5   5  -3   63.47    5.30
   5   5  -3   70.09    7.33
   5  -5  -3   62.54    5.27
   5   5   3   55.14    4.02
  -5   5  -3   55.76    6.59
   5  -5   3   63.76    8.15
  -5   5   3   71.28    5.36
   5  -6   3  258.77   14.38
   5   6   3  205.17   12.17
   5  -6  -3  243.78   10.17
  -5   6   3  235.29   10.68
   5  -6   3  252.78   12.64
  -5  -6   3  239.04   14.86
  -5   6  -3  242.93   13.12
   5  -6  -3  269.45   13.72
   5   6  -3  239.58   13.34
   5   6  -3  224.85   12.74
  -5  -6  -3  263.67   13.81
  -5  -6   3  240.26   10.75
  -5  -6  -3  243.07   11.97
  -5   6  -3  246.49   13.34
  -5   6   3  236.94   13.62
   5   6   3  227.74   11.06
  -5  -7   3    1.87    4.71
  -5   7   3    5.85    6.64
  -5  -7  -3    1.64    6.76
  -5  -7  -3    5.87    5.91
   5   7   3   17.81    6.08
   5  -7  -3    5.57    6.71
   5  -7   3   11.21   11.35
   5   7   3    3.76    6.36
  -5   7  -3   12.67    6.83
  -5   7   3    5.74    5.44
   5  -7   3   12.53    7.10
  -5   7  -3    1.22    6.43
  -5  -7   3    6.15    7.31
   5   7  -3    3.98    6.08
  -5   8   3  115.40   12.94
  -5   8  -3  132.62   12.88
  -5  -8  -3  103.80   13.15
  -5  -8   3  118.67   13.68
   5   8   3  131.15   12.52
  -5   8   3  136.50   13.28
  -5   8  -3  129.90   12.32
   5  -8   3  124.21   12.73
   5   8  -3  125.04   12.35
   5  -8   3  161.69   15.13
   5   8  -3  134.98   12.96
   5  -8  -3  126.62   13.14
   5   8   3  117.99   10.72
  -5   9  -3   12.42   10.59
   5   9   3   -2.47    9.66
  -5   9   3    4.44    9.54
  -5  -9   3   14.03   10.87
  -5   9  -3    8.47    9.35
   5   9  -3   13.09   10.03
   5  -9   3   12.01   12.07
  -5  -9  -3   11.38   11.09
   5  -9  -3    7.43    9.73
   5   9  -3    4.32    9.40
  -5 -10  -3   69.67   15.87
   5 -10  -3   84.92   16.48
   5 -10   3   79.12   16.78
  -5   0   4 3338.53   84.51
   5   0   4 3401.91   83.17
  -5   0  -4 3520.73   83.82
   5   0  -4 3308.46   80.86
  -5   0  -4 3348.90   80.25
   5   0  -4 3514.35   83.84
   5   0  -4 3363.76   80.26
   5   0  -4 3312.05   83.29
  -5   0  -4 3291.17   82.75
  -5   0  -4 3304.83   82.11
  -5   0   4 3336.62   80.88
  -5   0  -4 3250.14   82.11
   5  -1  -4   33.14    4.36
  -5   1  -4   36.11    4.19
  -5   1   4   30.84    4.25
  -5   1  -4   29.57    3.50
   5   1  -4   35.61    2.79
  -5  -1  -4   37.40    3.10
  -5  -1  -4   41.36    4.71
   5  -1  -4   41.91    3.10
   5   1   4   30.34    4.12
  -5  -1  -4   33.03    3.63
   5   1   4   33.04    3.29
   5   1  -4   35.16    4.62
  -5  -1   4   34.20    4.14
  -5   1  -4   30.49    3.47
   5  -1  -4   45.10    4.04
  -5  -1  -4   41.83    3.84
  -5  -1   4   27.85    4.53
   5  -1   4   38.79    4.54
  -5  -1   4   39.83    2.64
  -5   1   4   36.74    3.62
   5  -1   4   42.76    4.47
   5   1  -4   34.58    4.34
   5   1  -4   32.13    4.13
   5  -1  -4   31.42    3.51
  -5   1  -4   29.96    3.97
   5   1   4   32.20    4.00
   5  -1   4   37.29    3.14
   5  -1  -4   34.84    2.90
   5  -1  -4   39.55    4.31
   5  -2  -4 2701.72   64.76
  -5   2   4 2749.27   69.66
  -5   2  -4 2815.84   69.75
  -5  -2   4 2688.09   68.13
   5  -2  -4 2627.31   64.67
  -5   2  -4 2665.89   66.92
  -5   2  -4 2714.96   67.42
   5  -2   4 2692.47   66.83
  -5   2  -4 2691.60   67.08
  -5  -2  -4 2758.20   67.61
   5   2   4 2711.25   68.52
   5   2   4 2812.04   65.31
   5   2  -4 2704.15   66.96
  -5  -2  -4 2708.44   68.43
   5   2   4 2629.26   67.72
   5  -2   4 2816.19   69.29
   5   2  -4 2721.44   69.64
  -5  -2  -4 2743.59   68.66
  -5   2   4 2805.81   67.87
   5  -2  -4 2780.07   68.41
  -5  -2   4 2752.08   70.65
   5   2   4 2611.05   64.98
   5  -2  -4 2764.45   67.60
   5  -3   4    1.28    3.76
  -5  -3   4    6.54    3.18
   5  -3  -4    7.36    2.38
  -5  -3  -4    3.00    3.59
   5   3   4    5.29    2.37
  -5  -3   4    4.84    4.59
  -5   3  -4    3.32    3.97
  -5   3   4    5.56    1.93
   5  -3   4    8.24    3.09
   5   3   4   10.91    2.79
   5  -3  -4    4.90    3.52
   5  -3  -4    4.81    2.50
  -5   3  -4    5.19    3.61
   5   3  -4    3.73    3.51
   5   3  -4    3.27    3.52
  -5  -3  -4    2.16    3.53
   5   3   4    4.62    3.49
   5   3   4    6.33    2.98
   5  -3  -4    6.17    3.84
   5  -3   4    5.23    4.21
  -5   3  -4    7.18    3.90
   5  -3  -4    6.53    2.49
  -5   3   4    5.57    3.58
  -5  -3  -4    4.88    2.26
  -5  -4   4 2340.09   61.81
   5   4   4 2240.24   59.36
   5   4  -4 2241.58   60.48
   5  -4   4 2215.84   60.24
  -5   4   4 2275.26   59.47
  -5   4  -4 2282.15   60.57
  -5   4  -4 2387.98   61.15
  -5   4  -4 2299.06   56.79
   5  -4  -4 2343.59   58.15
  -5  -4  -4 2289.10   59.14
   5   4  -4 2335.49   58.76
  -5  -4  -4 2298.71   56.41
  -5  -4   4 2307.18   54.95
  -5  -4  -4 2274.55   60.33
  -5   4  -4 2360.09   58.87
   5  -4  -4 2250.50   56.12
  -5   4   4 2284.34   55.10
   5   4   4 2256.85   55.71
   5  -4  -4 2321.11   60.52
   5  -4   4 2239.44   58.22
  -5  -4   4 2289.61   58.25
   5   5   4    3.76    3.58
  -5   5   4    4.81    5.31
   5  -5   4    3.50    5.60
   5   5  -4    1.55    5.15
   5  -5   4    1.92    4.46
  -5   5  -4    6.52    5.44
  -5   5  -4    3.99    3.42
  -5   5  -4    2.81    4.93
  -5  -5  -4   -1.32    5.06
   5  -5  -4    6.83    4.17
   5   5  -4    5.96    5.15
  -5  -5  -4    6.12    4.68
   5  -5  -4    8.39    5.49
  -5  -5   4    4.23    5.97
  -5  -5   4    4.96    3.96
  -5   5   4    5.77    3.22
   5   5   4    1.30    4.77
  -5  -5   4    1.81    3.17
   5   6  -4 1098.25   33.58
   5   6   4 1086.59   30.04
   5  -6  -4 1056.44   30.42
  -5   6   4 1127.43   29.39
  -5   6  -4 1140.07   35.90
  -5  -6  -4 1090.44   34.77
   5  -6   4 1065.74   32.55
  -5  -6   4 1098.70   31.02
  -5  -6  -4 1150.94   32.55
  -5   6   4 1120.82   34.13
  -5   6  -4 1106.02   33.45
   5  -6   4 1122.05   34.95
   5   6   4 1071.68   34.37
   5  -6  -4 1130.12   34.67
   5   7  -4    7.92    6.84
  -5  -7  -4    6.43    7.70
  -5  -7  -4   11.48    6.73
   5  -7  -4    3.14    7.62
   5  -7   4   13.33    8.49
  -5  -7   4    6.90    8.13
  -5   7  -4    4.67    7.11
   5  -7   4    6.14    7.14
   5   7  -4    4.87    6.81
  -5   7  -4   10.14    7.68
   5   7   4    2.70    7.09
  -5   7   4    4.18    7.03
   5   7  -4   21.50    7.88
   5  -8  -4  591.68   25.03
  -5  -8   4  584.02   26.23
   5   8  -4  552.95   24.32
  -5   8   4  600.11   25.13
   5   8  -4  560.96   24.20
  -5   8  -4  579.37   24.64
   5   8   4  584.08   24.34
  -5  -8  -4  553.12   25.01
  -5   8  -4  516.70   24.11
   5  -8   4  575.60   25.91
  -5   9  -4   11.80   10.70
   5   9   4   18.86   10.47
  -5   9   4   24.75   11.23
  -5  -9   4   19.06   11.77
   5   9  -4   22.46   10.89
  -5   9  -4   23.15   11.13
   5  -9  -4   16.99   10.50
   5   9  -4   22.92   10.45
   5  -9   4   16.70   12.38
  -5  -9  -4   22.73   12.79
  -5   0  -5  812.18   23.05
   5   0   5  810.70   23.70
  -5   0   5  744.60   21.04
   5   0  -5  787.32   23.89
  -5   0   5  799.36   21.37
   5   0  -5  779.09   21.57
  -5   0  -5  819.90   21.19
  -5   0  -5  784.26   22.03
   5   0   5  758.40   21.38
  -5   0  -5  755.55   22.26
  -5   0  -5  808.11   23.41
   5   0  -5  786.33   21.08
   5   0  -5  800.52   23.06
  -5   0   5  839.28   24.70
   5   1   5    2.84    2.88
   5  -1  -5   -0.66    3.57
   5   1   5    2.26    3.48
  -5   1  -5    1.47    2.82
  -5  -1  -5    4.31    2.23
  -5   1  -5    0.29    3.72
   5  -1   5    1.99    3.46
   5   1  -5    9.13    3.00
  -5   1   5   -0.51    2.67
  -5  -1  -5   -0.09    3.11
   5   1  -5    1.58    3.41
  -5  -1  -5    1.97    2.81
   5  -1  -5    1.87    2.15
  -5   1  -5    1.78    3.45
  -5  -1   5    2.57    2.11
  -5  -1  -5    4.15    3.62
  -5   1   5    2.13    3.58
   5  -1  -5    2.63    2.94
   5  -1   5    0.59    2.54
  -5   1  -5    9.08    3.72
   5   1  -5    3.29    2.83
   5  -1  -5    3.00    2.31
   5   1  -5    3.32    3.80
  -5  -1   5    2.50    3.95
  -5   2   5  194.83    9.14
   5  -2  -5  177.93    7.87
  -5  -2  -5  200.99    9.96
   5  -2  -5  188.82    6.18
   5  -2   5  185.04   10.10
   5   2   5  181.38    9.56
   5   2  -5  181.01    7.12
   5   2   5  183.04    7.02
   5  -2  -5  212.53    9.94
   5   2   5  176.18    6.86
   5   2  -5  167.08    9.46
   5  -2  -5  200.77    8.07
   5   2  -5  185.42    8.95
  -5   2   5  186.60   10.04
   5  -2  -5  176.98    6.25
  -5  -2  -5  197.67    9.36
  -5   2  -5  176.91    9.54
   5  -2   5  189.29    7.74
   5   2   5  187.73    9.03
  -5  -2   5  182.76   10.97
  -5   2  -5  189.20    9.24
  -5   2  -5  172.36   10.56
   5   2  -5  179.58   10.05
  -5  -2   5  185.07    6.09
  -5   2  -5  184.52    8.91
  -5   3   5  398.40   15.12
  -5  -3   5  396.03   17.17
   5  -3  -5  414.94   15.05
  -5   3  -5  398.42   15.71
   5   3   5  424.96   11.69
   5  -3   5  417.02   13.60
  -5   3  -5  407.24   14.17
  -5   3  -5  409.61   14.91
   5   3  -5  418.35   14.96
  -5  -3  -5  397.10   12.50
   5   3  -5  412.58   15.42
   5  -3  -5  411.13   12.53
  -5  -3  -5  404.43   15.30
   5  -3  -5  428.35   16.20
   5   3   5  428.87   15.59
   5  -3   5  427.43   16.06
  -5  -3  -5  385.96   15.05
   5   3  -5  374.24   15.46
   5  -3  -5  401.31   10.90
  -5   4  -5  424.55   16.39
   5   4  -5  415.95   16.31
   5   4  -5  456.01   16.81
   5  -4   5  441.23   17.22
   5  -4   5  428.28   15.11
  -5  -4  -5  456.02   12.66
   5   4   5  444.45   12.86
  -5   4  -5  446.20   17.33
  -5  -4  -5  431.90   17.20
  -5  -4   5  437.93   18.51
  -5   4  -5  433.70   14.85
  -5   4   5  431.70   16.71
   5  -4  -5  423.77   17.28
  -5  -4  -5  449.61   16.68
   5   4   5  443.26   17.02
   5   4  -5  406.66   17.11
   5  -4  -5  444.08   16.18
  -5   5  -5   90.07    6.80
   5   5  -5  127.22    9.58
  -5  -5  -5   91.70    9.55
   5  -5   5   94.89   10.02
   5  -5   5  102.47    8.49
   5   5  -5   81.71    8.78
  -5  -5   5   85.64   10.35
  -5  -5  -5   95.28    8.94
  -5   5   5  108.45   10.77
   5  -5  -5  100.79    8.44
  -5   5  -5   99.25   10.11
   5   6  -5   63.76    8.46
  -5  -6   5   74.74   10.33
   5   6  -5   77.83    9.02
   5   6   5   67.16    9.22
  -5   6  -5   76.22    9.93
  -5   6  -5   98.87   10.42
  -5  -6  -5   93.32    9.24
   5  -6   5   86.04    8.74
   5  -6  -5   84.23    8.07
   5   6  -5   89.71    8.85
  -5   6   5   84.76    9.65
  -5  -6  -5   90.60   10.59
   5  -6   5   81.80   10.32
   5  -6  -5  111.62   10.97
  -5   7  -5  356.18   18.61
   5   7  -5  356.31   18.53
   5   7  -5  311.13   18.34
  -5   7  -5  305.06   18.03
   5  -7  -5  370.97   19.46
   5   7   5  335.66   18.76
  -5  -7  -5  346.78   16.94
   5  -7   5  338.53   19.22
  -5  -7   5  330.38   20.37
  -5  -7  -5  305.82   19.20
  -5   7   5  317.34   18.36
   5   8   5  131.50   13.67
  -5   8  -5  112.49   13.56
  -5  -8  -5  122.13   13.70
  -5  -8  -5  111.53   11.97
   5  -8   5  126.48   14.31
   5  -8  -5  147.81   15.31
  -5  -8   5  147.12   15.98
  -5   8   5  153.91   14.77
   5   8  -5  142.35   14.89
  -5   8  -5  112.41   12.94
   5   8  -5  139.81   14.37
   5   9  -5  100.08   16.52
  -5  -9   5   98.23   15.87
   5  -9  -5  108.48   15.90
   5   9   5   79.74   14.16
  -5   9  -5   63.97   14.60
   5   9  -5   89.44   14.44
  -5  -9  -5   86.38   19.69
   5  -9   5   97.09   15.73
  -5   9   5   76.26   14.90
  -5   9  -5  103.35   14.39
  -5   0  -6  180.19    9.65
  -5   0   6  210.04   11.82
   5   0  -6  210.89   10.41
  -5   0  -6  201.20    8.34
   5   0  -6  218.20    8.45
  -5   0  -6  219.29    9.78
  -5   0   6  210.13    8.82
  -5   0  -6  223.98   11.03
   5   0   6  219.19   12.05
   5   0   6  215.27   10.74
   5   0  -6  218.08   11.45
   5  -1  -6  977.72   25.24
  -5  -1   6 1031.37   30.81
   5  -1  -6  968.51   29.57
  -5  -1  -6 1042.26   29.58
   5   1  -6  963.43   26.85
   5  -1  -6 1007.72   28.23
  -5  -1   6  966.01   26.02
  -5  -1  -6 1022.75   28.30
   5   1   6  968.83   29.24
  -5   1  -6  964.10   29.07
  -5   1   6  997.07   27.57
  -5   1  -6 1002.71   28.97
   5   1  -6  998.44   29.43
  -5  -1  -6  982.45   25.37
  -5   1   6  967.18   30.09
   5  -1   6 1006.56   29.30
  -5   1  -6  982.54   26.97
  -5  -1  -6  982.51   27.93
   5  -1   6 1019.22   27.41
  -5  -2   6  642.96   17.38
   5   2   6  635.75   17.13
   5  -2  -6  626.37   21.59
   5   2  -6  641.79   19.80
  -5   2   6  629.04   20.31
  -5  -2  -6  655.66   19.23
  -5  -2  -6  646.32   21.51
  -5   2  -6  652.54   20.71
  -5   2  -6  626.08   21.37
   5  -2  -6  660.38   19.36
   5   2  -6  639.20   21.76
  -5  -2  -6  627.14   20.66
  -5   2  -6  665.33   20.02
  -5  -2   6  653.90   23.12
   5   2  -6  650.87   21.69
   5  -2  -6  652.16   17.17
  -5   2   6  632.46   21.91
   5   2   6  624.16   21.19
   5  -2   6  629.70   21.38
   5  -2   6  637.37   19.13
   5  -3  -6  547.63   16.25
   5   3  -6  509.34   19.55
   5  -3  -6  496.47   19.80
  -5   3   6  543.27   18.81
   5   3  -6  539.21   18.33
   5   3  -6  572.50   19.78
   5  -3   6  532.23   17.20
   5  -3   6  528.23   19.46
  -5  -3   6  531.42   21.04
  -5   3  -6  538.20   19.84
  -5  -3  -6  545.83   19.43
  -5  -3  -6  559.91   19.34
   5   3   6  513.69   19.44
   5  -3  -6  519.14   19.04
  -5   3  -6  576.30   18.59
  -5   3  -6  535.01   18.24
   5  -4  -6   59.62    7.77
  -5  -4  -6   47.91    7.35
   5   4  -6   39.03    7.03
   5   4   6   60.59    8.21
   5  -4  -6   69.96    8.94
   5  -4   6   56.43    6.48
  -5  -4   6   71.37    9.74
   5  -4   6   72.00    8.52
   5   4  -6   45.55    7.42
   5   4  -6   52.35    7.56
  -5   4  -6   90.12    8.86
  -5   4  -6   54.31    7.94
  -5   4  -6   64.55    7.25
  -5  -4  -6   59.02    8.23
  -5   4   6   64.70    8.22
   5  -5  -6  280.98   14.83
   5   5  -6  325.65   16.46
   5  -5   6  325.72   16.36
   5   5   6  338.77   16.81
  -5   5  -6  294.66   13.46
  -5   5  -6  335.50   15.92
  -5  -5   6  294.56   17.59
   5  -5  -6  311.68   16.73
   5  -5   6  296.76   14.71
  -5  -5  -6  301.23   16.17
  -5  -5  -6  300.02   15.13
   5   5  -6  304.94   15.68
  -5   5  -6  332.36   16.64
   5   5  -6  314.71   15.52
  -5   5   6  295.70   15.76
  -5   6  -6  245.14   15.40
  -5   6   6  236.58   16.43
  -5  -6  -6  265.50   15.02
   5   6   6  224.72   15.56
   5   6  -6  269.93   15.39
   5  -6  -6  245.33   16.56
   5   6  -6  223.95   15.37
  -5  -6  -6  263.36   17.03
   5  -6  -6  256.77   14.37
  -5  -6   6  262.04   18.16
   5   6  -6  227.50   16.02
  -5   6  -6  244.42   16.12
   5   7  -6  190.16   15.34
  -5  -7  -6  218.94   16.12
  -5   7   6  210.38   16.13
   5   7  -6  165.56   14.13
   5  -7   6  213.12   15.87
  -5   7  -6  192.98   15.19
  -5  -7   6  220.38   18.09
   5  -7  -6  224.92   17.10
  -5   7  -6  235.26   16.58
  -5  -7  -6  206.55   16.66
   5   7   6  242.29   17.06
  -5   8   6   32.20   11.90
   5   8  -6   23.13   10.32
  -5  -8  -6   30.50   11.94
  -5   8  -6   21.10   10.88
   5  -8   6   37.82   12.46
   5  -8  -6   28.88   10.72
  -5  -8  -6   19.60   10.12
  -5   8  -6   20.33   10.84
  -5  -8   6   14.64   11.18
   5   8   6   37.01   11.75
   5   8  -6   22.49   10.66
  -5   0  -7  273.63   12.71
  -5   0  -7  278.12   12.39
   5   0  -7  257.06   11.06
  -5   0  -7  268.43   10.22
  -5   0   7  279.56   11.33
   5   0  -7  283.20   13.19
  -5   0   7  274.35   14.77
   5   0  -7  272.90   13.84
  -5   0  -7  267.33   13.52
   5   0   7  267.67   13.22
  -5  -1  -7   42.59    7.02
   5   1   7   49.57    7.19
   5  -1  -7   48.11    7.41
  -5   1  -7   30.96    6.30
   5   1  -7   39.80    6.81
  -5   1  -7   42.48    6.66
  -5  -1  -7   47.55    6.54
  -5  -1  -7   44.29    5.90
   5  -1   7   62.53    7.65
   5  -1  -7   40.42    6.19
  -5   1   7   63.71    6.46
  -5   1   7   28.03    6.50
  -5  -1  -7   44.52    4.26
  -5  -1   7   48.16    8.21
  -5   1  -7   52.86    5.82
  -5  -1   7   44.45    4.92
   5   1  -7   57.47    6.14
   5   1  -7   54.90    8.01
   5  -1   7   51.86    6.24
   5  -2   7  716.36   24.18
  -5   2  -7  723.26   22.31
  -5  -2  -7  688.83   21.71
   5  -2  -7  705.39   21.95
   5   2   7  746.95   24.60
   5   2  -7  731.97   22.44
  -5   2  -7  739.04   23.74
  -5  -2   7  750.90   26.35
  -5   2  -7  744.51   24.49
  -5   2   7  705.04   22.91
   5  -2  -7  714.27   24.53
   5   2  -7  707.21   24.54
   5   2  -7  729.26   24.61
   5  -2   7  733.03   22.11
  -5  -2  -7  696.65   23.54
  -5   3  -7   21.40    6.93
  -5   3   7   15.62    6.14
   5  -3   7   21.02    5.41
  -5  -3  -7   20.72    6.65
   5   3  -7   13.07    6.57
   5  -3  -7   18.25   10.04
   5   3  -7   15.94    6.72
  -5   3  -7   16.67    6.11
   5  -3   7   15.53    6.22
  -5   3  -7   16.67    5.97
   5  -3  -7   11.39    6.47
  -5  -3  -7   14.25    6.25
   5   3   7   21.29    6.74
   5   3  -7    9.25    5.91
  -5  -4   7   48.71    9.67
   5  -4  -7   45.84    8.75
  -5  -4  -7   54.04    8.62
  -5   4  -7   56.95    9.28
   5   4  -7   55.07    8.91
  -5   4  -7   45.69    9.03
  -5  -4  -7   58.42    8.49
   5  -4   7   58.66    8.86
   5  -4  -7   57.88    8.98
  -5   4  -7   37.61    7.37
  -5   4   7   43.92    8.37
   5   4   7   51.43    9.02
   5  -5   7  202.90   14.68
  -5   5   7  209.62   15.24
   5   5  -7  214.20   14.94
   5   5  -7  219.91   15.20
  -5  -5  -7  211.89   14.64
  -5  -5  -7  192.95   14.93
  -5  -5   7  221.08   16.92
  -5   5  -7  209.99   13.43
   5  -5  -7  234.01   15.39
  -5   5  -7  209.39   14.38
   5   5   7  253.61   15.94
   5   5  -7  253.73   15.92
   5  -5  -7  253.85   16.67
  -5   5  -7  218.44   15.71
  -5  -6   7  274.13   19.00
   5   6  -7  236.47   17.79
  -5  -6  -7  237.61   17.84
   5   6   7  216.06   16.23
  -5  -6  -7  229.85   16.11
   5  -6  -7  232.18   17.77
   5   6  -7  258.76   16.65
   5   6  -7  250.50   17.52
   5  -6   7  253.80   17.25
  -5   6  -7  249.74   17.46
  -5   6   7  247.28   17.37
  -5   6  -7  236.98   17.11
   5  -6  -7  244.06   15.97
   5  -7  -7  113.97   14.93
   5   7  -7  109.76   13.76
  -5  -7  -7   87.43   12.26
   5  -7   7  121.29   14.96
  -5   7  -7  130.68   14.14
  -5   7  -7  118.98   14.22
  -5  -7   7   93.02   14.52
  -5   7   7   76.50   12.52
   5   7   7  143.68   15.27
   5   7  -7   80.86   12.45
  -5  -7  -7  104.02   14.52
  -5   8   7   54.52   13.85
   5   8  -7   33.29   14.14
   5   8  -7   38.30   12.54
   5  -8  -7   65.58   14.35
  -5  -8  -7   58.45   13.65
  -5   8  -7   40.59   15.56
   5   8   7   53.15   13.64
  -5  -8   7   37.26   13.39
  -5   8  -7   50.52   13.01
  -5  -8  -7   69.67   12.58
  -5   0  -8  462.43   19.64
   5   0   8  499.61   28.49
  -5   0   8  430.96   20.14
   5   0  -8  463.87   18.84
  -5   0  -8  520.33   18.85
   5   0  -8  503.28   20.61
  -5   0  -8  493.39   18.79
  -5   0   8  514.68   17.43
  -5  -1  -8   25.33    7.24
  -5  -1  -8   29.88    6.47
   5  -1  -8   26.22    7.71
   5   1  -8   30.48    5.98
  -5  -1   8   27.36    8.01
  -5   1  -8   14.91    6.89
  -5   1   8   28.68    7.55
  -5   1   8   25.08    6.06
   5   1  -8   27.03    7.64
   5   1  -8   27.53    7.05
   5   1   8   39.51    7.86
  -5   1  -8   44.66    8.64
   5  -1  -8   29.63    6.77
  -5   1  -8   29.11    5.64
   5  -1   8   28.95    7.04
  -5  -1  -8   31.31    6.98
   5   2  -8  414.58   16.16
  -5  -2  -8  393.25   18.15
  -5   2  -8  407.06   16.05
   5  -2   8  391.86   15.86
  -5  -2   8  398.46   19.44
   5   2  -8  402.61   18.51
  -5  -2  -8  388.26   15.61
  -5   2  -8  398.86   17.62
  -5   2  -8  393.32   17.86
   5  -2   8  385.59   17.64
  -5   2   8  395.40   16.71
   5   2  -8  399.07   18.50
  -5   2   8  398.87   18.65
   5   2   8  398.12   17.96
   5  -2  -8  378.18   15.73
  -5  -2  -8  399.71   17.69
   5  -2  -8  377.16   18.45
   5  -3  -8    7.48    7.73
   5   3  -8    5.31    6.60
  -5  -3  -8    4.96    7.04
  -5   3  -8   12.77    6.76
   5   3  -8    2.23    6.89
  -5  -3  -8    3.87    6.63
   5  -3  -8    3.31    7.02
   5   3   8    3.18    7.12
  -5   3   8    0.25    6.47
  -5   3  -8    3.88    6.80
   5   3  -8    7.78    7.21
  -5   3  -8    3.70    6.74
  -5  -3   8    3.90    7.99
   5  -3   8    5.01    7.71
   5   4  -8  251.39   15.56
   5   4  -8  219.04   15.53
  -5   4   8  212.66   15.04
  -5  -4  -8  211.01   15.06
   5  -4   8  231.74   15.23
   5  -4  -8  243.62   16.61
   5   4   8  225.14   15.85
   5   4  -8  249.93   17.00
  -5  -4  -8  217.67   15.91
  -5   4  -8  213.24   15.04
  -5  -4   8  245.04   17.52
   5  -4  -8  221.15   16.45
  -5   4  -8  232.38   16.09
   5   5  -8   29.08   10.26
   5   5  -8   24.16    8.86
  -5  -5  -8   18.28    9.40
  -5  -5  -8   22.38    8.75
   5  -5  -8   17.44    9.05
  -5  -5   8   19.44   10.46
   5  -5   8   22.77    8.97
  -5   5  -8   18.61    9.01
   5  -5  -8    9.81    9.58
  -5   5  -8   18.30    9.26
   5   5   8   20.94    9.28
  -5   5   8   19.82    9.37
   5   5  -8   30.31    9.37
   5   6  -8   81.23   12.10
   5  -6  -8  119.15   13.02
   5  -6  -8   97.32   13.85
   5   6  -8  111.95   12.89
  -5  -6  -8  107.97   13.08
  -5   6  -8   72.03   12.16
   5   6  -8   70.56   12.43
   5   6   8  100.08   13.18
  -5   6   8   92.62   13.24
  -5  -6  -8   91.95   13.07
  -5  -6   8  102.72   14.43
  -5   6  -8  104.94   12.88
   5  -7  -8    3.05   11.87
   5   7  -8    3.08   12.90
  -5   7  -8    0.74   11.17
  -5  -7  -8    5.64   11.68
  -5   7  -8   12.97   12.78
  -5  -7   8   -1.44   12.92
  -5  -7  -8    3.50   10.54
   5   7   8    5.81   11.22
   5   7  -8   -2.28   10.77
  -5   0   9   74.01   11.22
   5   0  -9   81.59   11.47
  -5   0  -9   87.48   10.84
  -5   0  -9   99.58   10.42
   5   0  -9  100.66   11.79
  -5   0  -9   74.37    9.67
   5   0   9   66.70    9.69
   5  -1  -9   15.53    8.82
   5  -1   9   10.36    7.33
  -5   1  -9   12.18    7.46
  -5   1  -9   19.59    8.13
  -5   1   9    8.28    7.97
  -5  -1  -9    3.66    7.42
  -5   1   9    6.91    6.56
   5   1   9    7.46    7.25
   5   1  -9   12.72    8.42
   5   1  -9   10.85    7.87
  -5  -1  -9   10.07    8.47
  -5  -1   9   16.19    8.91
  -5   1  -9    5.15    7.76
   5  -1  -9   14.37    7.26
  -5  -1  -9    8.01    6.76
  -5   2  -9  167.74   13.62
   5   2  -9  148.60   13.30
  -5  -2  -9  170.51   13.96
  -5  -2   9  149.27   14.33
   5  -2  -9  162.43   14.36
  -5   2   9  154.50   12.17
  -5  -2  -9  149.63   12.99
   5  -2  -9  141.65   14.09
   5  -2   9  148.05   12.54
   5   2  -9  146.92   13.73
   5   2   9  137.72   12.60
  -5   2  -9  184.94   13.95
   5   3   9    2.76    8.42
  -5   3   9    5.10    7.82
   5  -3   9    4.79    7.90
   5   3  -9    5.33    8.89
   5   3  -9    6.10    8.05
   5  -3  -9    0.23    8.52
  -5  -3   9    8.73    9.58
   5  -3  -9    3.86    9.10
  -5  -3  -9    3.29    8.59
  -5   3  -9    7.92    8.37
  -5  -3  -9    8.13    8.20
  -5   3  -9   11.14    7.86
   5   3  -9    2.93    8.63
  -5   3  -9    1.17    8.12
   5   4  -9   25.08    9.54
   5  -4   9   15.89    9.37
   5  -4  -9   12.92    9.72
   5  -4  -9   10.60    9.88
  -5   4  -9   20.06    9.76
   5   4   9   15.65    9.63
  -5  -4  -9   19.32    9.64
  -5   4  -9    9.79    9.18
   5   4  -9    6.31    9.69
  -5  -4   9   15.52   10.96
  -5  -4  -9   11.15    9.20
  -5   4   9   16.27    9.33
   5   4  -9    8.35    9.22
  -5   4  -9   14.31    8.73
   5   5  -9   14.41   10.49
   5  -5  -9   15.41   11.95
  -5   5  -9   15.65   10.40
  -5  -5  -9   15.31    9.73
   5  -5  -9    9.79    9.99
   5   5   9   21.73   10.72
  -5   5  -9   16.60   10.15
  -5  -5   9   13.11   11.57
  -5  -5  -9   19.32   11.09
   5   5  -9   15.17   10.51
   5   5  -9   16.54   10.58
  -5   5   9   15.34   10.83
   5   6  -9   40.17   12.00
  -5   6  -9   33.81   11.99
  -5   6  -9   64.81   13.75
  -5   6   9   40.77   12.60
   5   6   9   49.84   13.09
   5  -6  -9   51.21   12.67
  -5  -6   9   57.27   14.22
   5   6  -9   62.27   13.49
  -5  -6  -9   66.82   12.66
   5  -6  -9   61.91   13.91
   5   6  -9   60.44   12.96
  -5  -6  -9   56.44   14.19
  -5   0 -10  554.90   24.76
   5   0 -10  534.85   23.72
   5   0  10  529.59   24.03
  -5   0 -10  584.18   23.70
  -5   0  10  583.43   25.90
   5   0 -10  548.50   25.09
  -5   1 -10  278.02   18.27
  -5  -1  10  271.51   19.86
  -5  -1 -10  255.60   17.89
  -5   1  10  273.23   19.10
   5   1 -10  233.18   17.23
   5   1  10  273.85   18.28
   5  -1  10  274.70   18.14
  -5  -1 -10  224.43   17.04
   5  -1 -10  271.57   19.55
  -5   1 -10  248.29   17.98
   5   1 -10  262.73   19.07
  -5  -2  10  778.46   32.44
  -5   2 -10  830.19   30.62
  -5  -2 -10  793.29   31.02
   5   2 -10  809.20   30.66
  -5   2 -10  809.39   30.27
   5   2  10  775.16   30.44
   5  -2 -10  805.89   31.83
   5  -2  10  845.33   29.93
  -5  -2 -10  796.37   30.25
   5  -2 -10  805.26   32.20
  -5   2  10  802.96   29.31
   5   2 -10  797.40   31.16
   5  -3 -10  124.86   15.69
   5   3 -10   94.50   13.20
   5   3 -10   93.31   13.17
  -5  -3 -10   97.42   13.66
   5  -3  10  100.73   12.65
  -5  -3 -10  100.51   13.54
  -5  -3  10  104.37   14.42
  -5   3 -10  100.16   13.01
   5   3  10  133.58   14.64
  -5   3 -10   94.64   13.38
   5  -3 -10  106.46   14.03
  -5   3  10  117.79   13.13
   5  -4 -10  235.26   23.37
  -5  -4  10  333.34   23.75
   5   4  10  302.20   21.56
   5   4 -10  323.78   22.42
  -5   4 -10  341.78   22.52
  -5   4  10  331.70   22.17
   5   4 -10  295.15   22.00
   5  -4 -10  331.35   22.12
  -5  -4 -10  317.73   21.91
  -5   4 -10  299.59   20.94
  -5  -4 -10  292.46   20.74
   5   0  11   77.27   13.15
  -5   0  11   87.67   14.58
   5   0 -11   77.91   16.00
  -5   0 -11   58.65   20.69
   5  -1 -11   15.30   12.14
  -5  -1  11    7.82   11.71
   5   1 -11    9.57   10.78
  -5   1 -11   20.34   11.99
  -5   1  11   -0.90   11.06
   5   1 -11   -2.79   19.48
  -5  -1 -11    3.31   11.36
   5   1  11    8.62   10.96
  -5   1 -11   -0.84   10.79
   5  -1  11    1.36   10.51
   5  -2 -11   99.12   15.52
  -5  -2 -11  112.71   15.42
   5  -2  11  116.47   14.51
   5   2  11  117.81   15.32
   5   2 -11   97.32   14.97
  -5   2 -11   88.30   14.25
  -5   2 -11  122.55   15.35
  -5  -2  11  124.70   16.82
   5   2 -11  105.65   16.92
   5  -2 -11   88.61   19.00
  -5  -2 -11  119.61   19.73
  -6   0   0 3812.07   91.42
  -6   0   0 3852.34   90.33
   6   0   0 3813.97   88.59
  -6   0   0 3467.23   89.89
  -6   0   0 3908.68   90.56
   6   0   0 3693.65   89.91
   6   0   0 3837.88   91.41
   6   0   0 3568.39   90.55
   6   0   0 3620.22   90.04
   6   1   0 2153.16   55.21
  -6  -1   0 2225.01   55.65
   6  -1   0 2270.96   55.79
  -6   1   0 2281.92   53.99
   6   1   0 2282.40   54.23
  -6   1   0 2280.66   54.47
  -6  -1   0 2242.20   55.53
   6  -1   0 2160.16   55.36
  -6  -1   0 2271.94   55.38
   6   1   0 2189.46   54.18
   6  -1   0 2150.50   55.90
   6  -1   0 2172.61   54.48
   6  -1   0 2213.56   54.55
   6   1   0 2373.89   54.91
   6   1   0 2180.88   55.72
  -6   1   0 2246.63   54.69
  -6   1   0 2263.01   55.62
   6   2   0 1697.98   43.81
  -6   2   0 1762.26   42.61
   6  -2   0 1721.61   44.38
  -6  -2   0 1770.37   42.61
   6   2   0 1710.36   44.73
  -6  -2   0 1813.12   44.16
   6   2   0 1771.97   42.59
   6  -2   0 1726.26   42.47
  -6  -2   0 1822.93   44.87
   6  -2   0 1726.73   42.95
  -6   2   0 1806.48   42.92
   6  -2   0 1694.82   42.84
  -6  -2   0 1654.97   42.84
   6  -2   0 1669.27   43.80
   6   2   0 1762.42   43.03
  -6   2   0 1698.71   43.82
  -6   2   0 1686.39   44.15
   6  -2   0 1727.98   42.96
  -6  -2   0 1827.71   43.83
   6   2   0 1623.16   43.78
  -6   3   0  220.27    8.36
   6   3   0  235.12    8.59
  -6   3   0  223.07    6.79
   6   3   0  219.85    9.43
   6  -3   0  214.98    6.71
   6   3   0  216.94    8.19
   6   3   0  229.53    8.51
  -6   3   0  244.43    9.74
  -6   3   0  213.12    8.13
   6  -3   0  208.66    7.82
  -6  -3   0  225.07    9.76
  -6  -3   0  228.88    8.92
  -6  -3   0  222.79    7.84
   6  -3   0  217.49    8.53
   6  -3   0  224.74    8.14
   6   3   0  217.34    7.64
  -6   4   0 2319.53   57.30
  -6  -4   0 2315.82   58.21
  -6   4   0 2239.33   58.06
  -6   4   0 2270.03   59.06
   6   4   0 2397.89   57.61
   6   4   0 2300.28   57.00
  -6  -4   0 2393.52   60.46
   6   4   0 2284.83   58.35
   6  -4   0 2190.94   58.15
  -6  -5   0 1244.44   36.42
   6   5   0 1222.68   33.70
  -6   5   0 1240.28   35.46
  -6   5   0 1233.56   33.55
   6   5   0 1219.90   33.16
  -6  -5   0 1291.85   34.04
   6   5   0 1232.55   33.88
   6  -5   0 1277.35   34.36
  -6   5   0 1265.88   33.82
  -6  -6   0  428.61   15.32
  -6   6   0  438.86   15.05
   6   6   0  407.03   15.97
  -6  -6   0  424.61   18.49
  -6   6   0  451.17   16.13
   6   6   0  432.35   15.28
   6  -6   0  425.35   16.37
   6   6   0  412.46   15.27
  -6   6   0  411.69   17.59
   6   7   0    0.87    5.10
  -6  -7   0    0.44    4.88
  -6   7   0    0.90    5.24
   6   7   0    1.61    5.59
  -6   7   0    2.88    6.70
  -6   7   0    8.12    6.06
  -6  -7   0    3.31    7.58
   6   7   0    5.85    5.80
   6  -7   0   -2.84    5.63
   6   8   0  342.13   17.05
   6   8   0  339.25   16.26
   6  -8   0  343.41   18.16
   6   8   0  379.48   17.90
  -6  -8   0  335.98   19.99
  -6   8   0  356.53   19.88
  -6   8   0  341.21   17.68
  -6  -9   0  717.72   31.09
   6  -9   0  723.57   28.64
   6   9   0  700.43   27.53
  -6   9   0  723.30   30.65
  -6   9   0  720.65   27.60
   6   9   0  693.52   26.70
   6 -10   0   64.32   13.95
   6  10   0   75.40   13.40
  -6  10   0   81.05   15.51
  -6  10   0   68.84   13.13
  -6   0   1   10.88    1.80
  -6   0  -1   15.91    1.83
   6   0  -1   14.92    2.83
   6   0   1   14.99    2.57
  -6   0  -1   10.86    1.98
   6   0  -1   13.21    2.21
  -6   0   1   14.38    1.89
   6   0   1   10.85    2.15
   6   0  -1   12.02    2.02
  -6   0   1    8.43    2.15
  -6   0  -1   13.76    1.98
   6   0  -1   19.99    2.40
  -6   0   1   12.64    2.31
   6   0  -1   19.28    3.10
  -6   0  -1   14.69    2.37
   6   0   1    7.54    2.11
   6   0   1   12.18    1.64
  -6   0  -1   15.66    3.16
  -6  -1  -1   10.57    2.43
  -6  -1   1   15.42    2.89
  -6  -1  -1   10.35    1.97
  -6  -1   1   16.48    2.52
  -6   1   1   13.36    2.30
   6   1   1   12.02    2.30
  -6   1   1   12.61    2.00
   6   1   1   10.71    2.25
  -6   1  -1   11.40    2.12
  -6   1   1    8.40    2.04
   6  -1  -1   11.11    2.10
   6  -1  -1   10.61    2.53
  -6  -1  -1   14.13    2.02
  -6  -1   1   11.88    1.98
  -6   1  -1   10.20    3.58
   6  -1  -1    9.29    2.29
  -6  -1  -1   10.58    2.28
   6  -1   1   23.20    2.97
   6  -1   1   13.66    2.63
   6   1  -1   11.92    3.06
   6   1  -1   14.91    1.70
  -6   1  -1   14.20    2.11
   6  -1  -1    9.90    2.33
  -6   1  -1   15.56    2.41
  -6  -1  -1   15.03    2.68
   6  -1  -1    9.24    2.05
   6   1  -1   16.80    2.54
   6  -1   1   15.92    2.28
   6  -1   1   14.59    2.66
  -6   1   1   14.66    2.12
   6   1  -1   13.41    2.18
  -6   1   1   14.16    2.39
  -6  -1   1   12.00    2.51
   6   1   1   17.57    2.57
   6   1   1   10.87    2.65
   6   2   1 2543.50   60.51
   6  -2   1 2475.18   61.80
   6  -2  -1 2432.49   59.61
   6  -2   1 2435.25   59.57
   6   2  -1 2392.93   61.36
   6  -2   1 2535.11   60.23
   6   2  -1 2352.14   61.45
   6  -2  -1 2350.21   61.04
  -6  -2  -1 2586.97   61.97
   6   2   1 2513.73   59.90
   6  -2   1 2753.00   66.01
   6  -2   1 2456.52   59.71
  -6   2  -1 2476.41   59.75
   6  -2  -1 2490.01   61.16
   6   2   1 2349.85   61.02
  -6   2   1 2491.81   59.55
  -6  -2  -1 2538.49   61.37
  -6   2   1 2529.60   61.22
   6  -2   1 2396.32   61.89
   6  -2   1 2508.30   59.70
  -6   2   1 2506.93   61.22
  -6  -2   1 2406.98   60.06
  -6   2  -1 2408.78   61.72
   6  -2  -1 2410.82   61.15
   6   2  -1 2419.06   62.79
  -6  -2  -1 2568.69   61.23
   6   2  -1 2500.18   58.97
  -6  -2  -1 2475.52   60.43
  -6  -2   1 2475.74   61.27
  -6  -2   1 2505.33   64.17
  -6   2   1 2460.68   60.06
   6   2   1 2418.67   59.39
   6  -2  -1 2457.64   59.99
   6   2   1 2282.76   61.47
   6  -2  -1 2472.36   61.16
  -6  -2   1 2507.27   59.07
   6   3  -1  149.42    6.99
  -6  -3  -1  168.91    8.15
  -6  -3  -1  137.44    7.10
   6  -3  -1  142.34    7.06
   6   3  -1  144.58    5.40
   6  -3  -1  152.27    7.32
   6   3   1  163.40    6.83
  -6   3  -1  156.71    7.02
   6  -3  -1  135.04    7.11
   6   3   1  146.82    6.51
  -6   3  -1  157.97    8.28
   6   3  -1  160.80    7.16
  -6   3  -1  136.89    6.75
   6  -3  -1  157.33    5.77
  -6  -3   1  141.30    8.07
  -6   3  -1  149.01    5.33
  -6   3  -1  142.92    5.99
   6  -3  -1  150.28    5.72
   6   3   1  157.09    6.66
  -6  -3   1  145.92    5.49
  -6   3   1  138.79    7.37
  -6  -3  -1  150.97    7.21
  -6   3   1  146.17    6.12
   6   3  -1  149.52    8.49
   6  -3  -1  145.20    6.73
   6  -3   1  150.03    4.95
  -6  -3  -1  151.31    7.22
  -6  -3   1  147.57    7.09
   6   4   1   18.03    3.23
  -6  -4   1   17.92    3.29
  -6  -4  -1   16.67    3.65
   6  -4  -1   14.93    2.45
  -6   4   1   24.03    3.35
   6  -4  -1   19.65    3.97
  -6   4   1   10.27    3.63
  -6  -4   1   23.46    4.06
  -6   4   1   18.35    3.47
  -6   4  -1   18.58    3.89
   6  -4   1   16.22    3.33
   6   4  -1   18.86    3.88
  -6   4  -1   25.36    5.26
   6   4   1   22.08    3.81
  -6   4  -1   15.72    3.65
   6   4   1   16.88    3.59
  -6  -4   1   13.00    4.20
  -6  -4  -1   16.81    4.61
   6  -4  -1   11.21    3.40
   6   4  -1   20.00    4.09
   6   4  -1   14.04    2.78
   6   4   1   18.90    3.64
   6  -4  -1   17.84    2.32
  -6   4  -1   10.38    3.69
   6   5  -1    7.20    3.94
   6  -5  -1    5.39    2.13
  -6  -5  -1    3.49    3.67
   6  -5   1    5.95    4.02
   6   5   1    5.37    4.81
   6   5   1    4.79    3.61
  -6   5   1    6.16    4.66
   6   5  -1    2.31    4.01
  -6  -5   1    6.12    3.60
   6   5   1    4.13    3.67
  -6   5   1    2.80    3.39
  -6   5  -1    3.45    4.84
  -6   5  -1    7.56    4.24
  -6   5  -1    6.91    3.88
  -6  -5   1    3.48    4.62
   6   5   1    3.30    3.41
   6  -5  -1    7.86    4.01
   6  -5  -1    4.34    1.82
  -6  -5  -1    4.48    4.75
  -6  -5   1    4.78    4.01
   6  -5  -1    4.16    4.00
  -6   6  -1  574.55   19.71
   6   6   1  605.21   19.93
   6   6  -1  610.20   19.87
  -6   6   1  617.08   19.88
  -6   6  -1  611.88   20.52
  -6  -6  -1  554.90   22.21
  -6   6   1  625.43   18.36
  -6  -6  -1  622.18   19.85
   6   6  -1  597.70   18.98
  -6   6  -1  609.22   21.90
   6  -6  -1  625.15   20.76
  -6  -6   1  605.11   19.14
  -6   6   1  582.36   21.59
   6   6   1  595.72   18.67
   6   6   1  599.42   19.99
   6   6  -1  605.31   20.75
   6  -6   1  591.20   20.31
  -6  -6   1  656.38   23.16
  -6   7  -1  105.66    8.98
  -6   7   1   96.37    7.28
   6  -7  -1   77.95    8.83
  -6   7  -1  104.43   11.10
  -6   7   1   94.72    8.87
  -6  -7  -1   94.23    8.26
  -6  -7   1   97.98   11.00
  -6   7  -1   69.51    8.62
   6   7  -1   94.20    8.64
   6   7   1  102.16    9.38
   6   7  -1  112.72    9.24
   6   7  -1   82.20    8.72
  -6   7   1   88.76   10.12
   6   7   1   92.07    7.61
  -6  -7  -1  105.44   11.42
   6   7   1   79.87    8.36
   6  -7   1  102.71    9.91
  -6  -7   1   95.34    8.00
   6  -8   1   17.01    8.25
  -6  -8   1   11.08    8.90
  -6   8  -1   23.28    9.47
   6   8   1   19.19    9.58
   6   8  -1   15.51    7.59
  -6  -8  -1   14.23    9.64
  -6   8   1   19.33    7.55
   6   8  -1   15.02    7.23
   6   8  -1   19.49    7.67
  -6   8   1   10.81    8.51
  -6   8  -1   18.66    7.56
   6  -8  -1   14.46    7.77
  -6   8  -1   18.96    7.99
   6   8   1    9.56    7.18
  -6  -9   1   26.40   11.46
   6  -9   1   28.93   10.65
  -6   9   1   22.09   10.97
   6   9   1   18.40    9.02
   6   9  -1   26.85    9.67
  -6   9   1   16.41    9.21
   6  -9  -1   27.88   10.66
  -6   9  -1   18.69   11.04
   6   9   1   30.33    9.93
  -6  -9  -1   33.04   11.82
  -6   9  -1   23.90    9.76
   6 -10  -1  116.98   15.90
   6  10   1  125.78   14.34
   6  10  -1  107.55   14.16
  -6 -10  -1  116.52   18.97
   6  10   1  186.23   26.01
  -6  10   1  163.76   18.33
  -6  10   1  128.73   14.15
  -6  10  -1  142.52   15.40
   6 -10   1  151.40   17.57
  -6  10  -1  144.87   18.01
  -6   0   2  550.99   14.91
   6   0  -2  554.89   15.75
   6   0  -2  549.29   16.28
   6   0   2  573.46   16.04
  -6   0  -2  569.76   15.98
  -6   0   2  584.53   16.69
  -6   0   2  556.89   16.15
  -6   0  -2  572.44   16.66
   6   0   2  564.93   16.54
  -6   0  -2  559.06   15.25
   6   0   2  547.19   16.05
   6   0  -2  547.80   16.11
  -6   0  -2  570.11   14.55
   6   0   2  543.66   15.36
   6   0  -2  551.03   16.80
   6   0  -2  566.57   14.78
   6   0  -2  545.62   15.32
   6   0   2  552.38   14.40
  -6   0  -2  569.81   16.04
  -6  -1  -2   14.13    3.26
   6   1  -2   15.16    1.38
   6   1  -2   10.83    2.41
   6  -1  -2   12.79    2.66
  -6   1  -2   10.28    3.73
  -6   1  -2   21.67    3.71
  -6  -1   2   22.73    3.16
   6   1   2   21.39    3.25
  -6   1   2   19.84    3.02
   6  -1  -2   12.30    2.33
  -6  -1   2   13.39    3.13
  -6  -1  -2   14.74    3.16
   6   1  -2   16.23    2.91
   6   1  -2   28.69    5.02
  -6  -1  -2   11.75    2.05
  -6   1  -2   11.60    2.40
   6   1   2   12.17    2.35
   6  -1   2   11.38    2.92
   6   1  -2   17.66    3.72
   6  -1   2   12.21    3.43
   6   1  -2   16.78    1.54
  -6   1   2   11.44    2.13
  -6  -1  -2   15.73    2.50
  -6   1  -2   16.83    2.65
  -6   1   2   18.22    2.89
  -6  -1  -2   16.08    2.44
  -6   1   2   12.57    2.36
   6  -1  -2   14.24    2.99
   6  -1  -2    8.29    2.98
  -6   1   2   16.30    2.17
   6   1  -2   19.75    3.07
  -6  -1   2   13.76    3.26
   6   1   2   15.36    3.11
   6  -1   2    8.74    2.57
   6  -1   2   15.40    2.87
   6  -2  -2  771.90   22.57
   6   2  -2  785.02   21.91
  -6  -2   2  812.24   23.70
  -6   2   2  814.46   20.90
   6   2   2  797.81   22.39
  -6   2   2  816.14   21.76
  -6   2  -2  790.04   22.60
  -6   2  -2  811.56   21.18
   6   2  -2  845.74   22.93
   6   2   2  796.34   20.98
  -6   2   2  802.49   21.35
  -6  -2  -2  810.24   22.43
  -6  -2  -2  822.17   22.52
  -6   2  -2  855.78   22.16
   6   2  -2  746.87   22.82
   6  -2  -2  779.35   21.63
   6  -2  -2  774.42   22.38
  -6  -2  -2  821.35   21.64
   6   2   2  837.47   21.40
  -6  -2   2  817.08   22.43
  -6  -2  -2  842.81   22.50
   6  -2  -2  774.65   21.43
  -6   2   2  868.45   27.17
   6  -2   2  798.67   21.05
   6   2   2  830.41   22.35
   6   3   2   34.45    3.62
   6  -3  -2   31.43    3.88
  -6   3  -2   25.53    3.88
  -6  -3   2   36.97    5.26
  -6   3   2   36.87    3.22
   6  -3  -2   35.06    3.95
   6   3   2   30.79    4.03
  -6  -3   2   42.09    4.41
   6   3  -2   35.38    4.42
  -6   3   2   42.68    3.59
  -6   3   2   45.55    4.97
  -6  -3  -2   29.33    4.39
   6  -3   2   43.97    5.96
  -6   3  -2   39.51    4.48
   6  -3  -2   34.53    4.17
   6  -3   2   37.29    2.98
  -6  -3   2   30.02    2.33
   6  -3  -2   44.26    3.55
  -6  -3  -2   35.52    3.11
   6   3  -2   36.54    4.38
   6  -3   2   35.84    3.31
   6   3   2   31.42    3.57
   6  -3  -2   30.57    3.42
   6   3  -2   33.04    2.44
  -6   3  -2   31.60    3.03
  -6   3  -2   32.34    2.85
  -6  -3  -2   32.28    4.19
  -6  -4   2  498.05   18.10
   6  -4   2  485.87   13.18
  -6   4  -2  508.42   13.35
  -6  -4  -2  527.44   17.61
  -6   4   2  508.84   14.59
   6   4  -2  524.83   16.83
   6   4   2  515.76   15.08
   6   4  -2  485.05   16.54
  -6   4  -2  532.67   16.97
   6  -4  -2  474.59   14.70
   6  -4  -2  505.70   16.70
   6  -4   2  530.26   15.61
   6   4   2  513.75   15.43
  -6   4   2  531.04   17.37
   6  -4   2  515.08   18.30
  -6  -4   2  492.70   13.87
  -6   4   2  513.95   15.14
   6  -4  -2  532.35   14.71
   6   4  -2  501.07   14.03
   6   4   2  516.41   16.42
   6   4   2  491.29   15.12
  -6  -4  -2  523.61   16.55
  -6   4  -2  508.78   16.66
  -6  -4   2  513.56   16.15
   6  -5  -2   87.44    5.27
  -6   5   2   80.13    6.12
  -6   5  -2   96.32    9.13
   6  -5  -2   93.59    7.84
   6   5  -2   76.25    5.87
  -6   5  -2   79.52    7.35
  -6  -5   2   90.71    9.13
  -6   5  -2   88.32    7.50
  -6   5   2   65.12    7.09
   6   5   2   78.01    6.95
   6   5   2   75.72    5.80
   6   5   2   85.69    6.63
  -6  -5  -2  101.84    7.48
   6   5  -2   71.52    7.22
   6  -5   2   93.34    7.15
  -6  -5   2   84.17    6.47
  -6   5   2   76.83    5.34
   6   5  -2   98.31    7.60
  -6  -5  -2   73.67    7.77
  -6   6   2  259.58    9.71
   6   6  -2  239.78   12.67
  -6  -6   2  268.65   11.31
   6   6   2  251.28   11.97
  -6   6  -2  276.36   15.18
  -6   6   2  248.79   13.59
   6  -6   2  258.22   12.74
  -6  -6  -2  248.25   14.12
  -6  -6   2  271.04   14.85
  -6  -6  -2  272.68   12.58
   6   6   2  251.76   10.45
   6   6   2  261.39   12.65
   6   6  -2  253.46   10.91
  -6   6  -2  245.92   12.99
  -6   6  -2  238.25   12.66
  -6   6   2  247.17   11.32
   6  -6  -2  255.01   13.15
   6   6  -2  240.83   12.98
  -6  -7   2   76.37    7.34
  -6   7  -2   66.60    9.12
  -6   7   2   41.81    8.34
   6  -7   2   71.77    8.99
   6   7  -2   47.32    7.07
   6   7   2   58.90    7.59
  -6  -7   2   69.54   10.38
   6   7  -2   52.40    8.51
   6   7  -2   54.34    8.18
  -6   7  -2   55.07    9.52
  -6  -7  -2   57.21    7.24
  -6   7   2   48.71    6.96
   6  -7  -2   66.31   10.00
   6   7   2   55.23    8.19
  -6  -7  -2   57.63    9.60
  -6   7  -2   57.74    8.31
  -6   8   2   67.18   10.48
   6  -8   2   80.57   10.72
   6   8   2   64.52   10.93
   6   8  -2   75.56    9.68
  -6  -8  -2  108.67   12.64
  -6   8   2   79.95    9.11
  -6  -8   2   77.08   11.69
  -6   8  -2   97.60   12.77
   6  -8  -2   68.12    9.98
   6   8   2   77.03   10.08
   6   8  -2  106.89   10.90
  -6   8  -2   75.31   10.40
   6   9  -2   48.07   10.63
  -6   9  -2   75.17   11.50
   6   9   2   62.97   11.37
  -6   9  -2   69.22   13.39
   6   9   2   55.31   10.61
  -6  -9  -2   43.57   12.33
  -6   9   2   56.16    9.91
  -6  -9   2   59.48   13.06
   6   9  -2   53.68   11.22
   6  -9   2   47.22   11.64
   6  -9  -2   51.14   11.09
  -6   9  -2   39.48   10.61
  -6   9   2   33.08   11.12
  -6  10  -2   50.69   15.39
  -6  10  -2   48.15   15.99
  -6 -10   2   47.88   17.98
   6  10   2   60.52   13.32
  -6  10   2   53.92   15.07
  -6 -10  -2   55.15   14.96
   6 -10  -2   57.99   14.00
   6   0  -3  330.59   10.86
  -6   0  -3  333.86    9.73
  -6   0   3  345.22   12.19
   6   0  -3  428.43   15.82
   6   0   3  354.35   11.97
  -6   0   3  349.24   11.55
  -6   0  -3  357.51   11.45
  -6   0   3  338.21    9.88
  -6   0  -3  334.11    9.70
   6   0   3  335.14   11.51
   6   0  -3  329.20   10.31
   6   0  -3  321.04    9.79
  -6   0  -3  338.48   11.13
   6   0   3  323.10   10.63
   6   0  -3  337.58   10.18
  -6   0  -3  331.38   10.37
  -6  -1   3   23.11    4.44
  -6  -1  -3   19.25    2.81
  -6   1  -3   25.04    3.46
   6  -1  -3   24.45    3.12
  -6   1  -3   22.82    2.00
  -6  -1  -3   19.31    3.35
  -6  -1   3   27.02    3.56
   6   1  -3   23.79    3.50
  -6   1  -3   25.05    3.19
   6  -1   3   24.22    3.60
  -6  -1  -3   27.80    3.17
   6   1   3   27.99    3.89
   6  -1  -3   23.17    2.97
  -6   1  -3   17.17    3.19
  -6   1   3   21.51    3.66
   6  -1  -3   25.16    3.49
  -6  -1  -3   20.06    2.52
   6  -1  -3   22.60    2.73
  -6  -1   3   19.70    3.35
   6   1   3   27.36    3.66
   6   1  -3   22.03    1.63
   6  -1  -3   20.09    2.61
  -6   1   3   24.62    2.99
   6  -1   3   26.72    3.80
   6  -1  -3   23.61    3.68
   6   1   3   22.42    3.07
   6   1  -3   28.04    3.78
   6  -1   3   23.02    3.94
  -6   2   3 4751.34  114.51
   6   2   3 4511.00  115.64
   6   2   3 4560.06  112.86
   6   2   3 4847.43  112.29
   6  -2   3 4784.98  116.25
  -6   2  -3 4787.98  114.04
  -6   2  -3 4766.56  117.13
   6  -2  -3 4760.74  114.96
  -6   2   3 4741.53  111.60
  -6   2   3 4771.79  116.66
  -6   2  -3 4691.10  113.47
   6   2  -3 4784.80  113.40
   6  -2   3 4607.06  113.80
  -6  -2   3 4764.82  117.94
   6  -2   3 4839.85  113.48
  -6  -2  -3 4880.90  115.68
   6   2  -3 4698.11  117.19
  -6  -2   3 4577.04  114.93
   6  -2  -3 4727.95  111.80
  -6  -2  -3 4761.97  115.34
  -6   2  -3 4759.20  113.36
   6  -2  -3 4761.76  115.62
   6   2   3 4755.90  115.12
   6   3   3  160.48    6.88
   6   3   3  154.12    6.71
  -6   3  -3  174.78    8.23
   6  -3  -3  150.62    6.43
   6  -3  -3  147.22    6.90
  -6  -3  -3  172.54    8.49
  -6   3  -3  145.53    6.44
   6  -3  -3  163.48    8.46
  -6   3  -3  156.48    6.74
  -6   3   3  161.90    8.26
  -6   3  -3  170.22    8.55
  -6  -3   3  166.51    7.88
   6  -3   3  179.43    9.63
  -6  -3   3  154.79    9.53
   6  -3  -3  169.20    7.68
  -6   3   3  166.48    6.07
   6   3  -3  159.39    8.47
  -6  -3  -3  163.09    6.41
   6  -3   3  155.21    6.30
  -6  -3  -3  162.21    8.46
   6   3  -3  163.92    8.15
   6   3   3  169.91    8.34
  -6   3   3  157.42    6.26
   6  -4  -3  410.43   13.25
   6  -4   3  379.20   11.94
   6   4   3  388.81   12.75
  -6  -4   3  401.15   10.69
  -6   4  -3  395.20   14.62
  -6  -4   3  424.87   16.62
  -6   4  -3  416.67   15.02
   6   4   3  382.79   13.10
   6  -4  -3  421.11   15.27
  -6  -4  -3  403.68   11.88
   6   4   3  413.78   14.73
   6  -4   3  416.73   13.25
   6  -4  -3  389.92   12.07
   6  -4   3  444.15   16.88
   6   4  -3  394.15   14.53
   6   4   3  373.41   13.85
  -6  -4  -3  397.81   15.11
  -6   4  -3  419.21   11.95
  -6  -4   3  432.25   11.21
   6   4  -3  420.08   15.12
  -6   4   3  397.57   13.40
  -6   4   3  384.75   14.83
  -6   4  -3  434.10   14.81
  -6  -4  -3  405.90   14.53
  -6   4   3  390.81   11.65
   6  -4  -3  375.68   13.11
  -6  -4   3  418.97   14.09
   6   5   3   68.39    5.93
   6   5   3   72.50    5.55
   6   5  -3   71.90    5.19
   6   5  -3   66.90    7.11
  -6  -5  -3   87.79    7.59
   6   5  -3   55.94    6.73
  -6  -5  -3   84.88    8.44
  -6   5  -3   63.87    4.29
  -6   5  -3   49.13    6.36
   6  -5   3   73.28    6.66
   6  -5  -3   58.56    7.02
  -6  -5   3   71.58    8.33
  -6   5   3   76.80    5.72
   6  -5  -3   72.52    5.54
  -6  -5   3   72.67    6.31
   6   5   3   79.39    7.84
   6  -5   3   74.40    8.51
  -6   5  -3   56.94    6.64
  -6   5   3   66.64    7.73
  -6   5   3   61.61    4.42
  -6  -6  -3 1651.46   53.82
  -6   6   3 1445.77   49.68
   6   6  -3 1496.02   53.64
   6   6   3 1584.34   44.39
  -6   6  -3 1605.56   45.05
  -6   6   3 1614.56   41.61
  -6  -6   3 1649.03   48.40
  -6  -6   3 1642.26   42.64
   6  -6  -3 1610.52   41.73
   6   6  -3 1624.56   45.20
   6  -6  -3 1657.60   45.75
   6  -6   3 1534.79   43.76
   6  -6   3 1598.09   46.44
  -6  -6  -3 1638.18   43.71
   6   6   3 1604.21   42.13
  -6   7  -3  176.85   14.95
  -6  -7   3  188.37   10.86
  -6  -7  -3  186.28   12.38
   6   7  -3  201.84   13.58
  -6  -7   3  172.83   14.00
   6   7   3  181.93   11.79
  -6   7   3  187.38   11.24
   6  -7   3  189.08   14.73
  -6   7  -3  186.40   13.66
   6  -7  -3  201.47   13.77
  -6   7   3  145.50   12.12
   6  -7   3  171.77   13.22
  -6  -7  -3  177.65   14.00
   6   7   3  187.75   13.55
   6   7  -3  192.98   13.99
   6  -8  -3   61.13   10.85
  -6  -8  -3   39.11   10.00
   6  -8   3   48.67   10.59
  -6   8  -3   34.71    9.63
  -6   8   3   42.10    9.73
   6   8  -3   39.21    9.61
  -6  -8   3   33.11   10.37
   6   8  -3   36.93    9.32
  -6   8  -3   39.67    9.66
   6   8   3   36.72    8.38
  -6  -8  -3   51.85   11.06
   6  -8   3   46.07   11.16
   6   8   3   40.75    9.39
  -6  -9  -3  151.64   16.64
   6   9  -3  122.52   13.73
  -6   9  -3  148.89   14.35
   6   9  -3  151.02   14.74
   6  -9  -3  160.50   15.76
   6  -9   3  156.42   16.70
  -6  -9   3  155.69   16.54
  -6   9   3  128.54   14.73
  -6   9  -3  141.23   14.79
   6   9   3  115.21   13.77
   6   0   4  234.77   10.12
  -6   0   4  232.43    7.97
  -6   0   4  233.18   10.58
  -6   0  -4  240.83    9.35
   6   0   4  226.15    8.84
   6   0  -4  247.88    8.45
   6   0  -4  250.75    8.36
   6   0  -4  244.40   10.29
   6   0  -4  242.42    9.46
  -6   0  -4  246.69    9.82
  -6   0  -4  248.87    8.51
  -6   0  -4  234.45    8.41
   6   0  -4  232.72    8.23
  -6   0  -4  245.52    8.21
  -6   1   4 1618.30   40.10
   6   1   4 1496.37   41.96
  -6  -1  -4 1584.04   38.85
  -6  -1  -4 1587.80   41.45
   6   1   4 1544.44   41.55
  -6   1  -4 1664.33   41.97
  -6   1  -4 1525.86   39.81
  -6  -1  -4 1632.10   40.97
  -6   1  -4 1549.98   39.16
  -6  -1  -4 1525.71   40.30
   6   1   4 1575.33   39.09
  -6  -1  -4 1587.63   40.50
  -6  -1   4 1617.48   43.11
   6   1  -4 1576.08   41.89
   6  -1  -4 1546.37   40.41
  -6   1   4 1586.36   42.32
   6  -1   4 1592.79   42.05
  -6   1  -4 1636.83   41.09
   6  -1  -4 1639.29   38.86
   6   1  -4 1523.95   38.22
   6   1  -4 1554.32   39.82
  -6  -1   4 1565.28   38.23
   6  -1  -4 1531.83   40.04
   6  -1  -4 1579.95   38.68
  -6  -1   4 1629.54   41.53
  -6   1  -4 1527.65   39.34
   6  -2   4   94.05    4.48
  -6  -2   4  120.87    8.59
   6  -2  -4   95.02    5.64
  -6  -2   4   96.05    6.51
  -6  -2  -4   92.82    5.42
   6   2   4   99.11    7.07
  -6  -2  -4   98.57    6.54
   6  -2   4   91.47    7.32
  -6   2   4   77.68    6.54
   6  -2  -4  101.06    5.55
   6  -2  -4   91.33    5.04
  -6   2  -4   93.16    6.27
   6   2   4   88.15    6.38
  -6   2  -4   94.62    6.40
  -6   2   4   97.17    6.28
   6   2   4  109.05    5.47
   6   2  -4   85.46    6.37
   6  -2  -4   99.76    7.30
  -6   2  -4  107.84    7.12
   6   2  -4   98.64    7.28
  -6   2  -4   94.94    5.65
   6  -2  -4   94.69    4.79
  -6  -2  -4   95.41    6.98
  -6   3  -4  428.20   13.53
  -6  -3  -4  444.51   15.19
   6  -3   4  424.47   16.27
   6   3   4  427.13   12.41
   6  -3  -4  402.64   12.48
   6  -3  -4  417.97   12.54
  -6  -3   4  442.33   16.97
  -6  -3  -4  424.94   14.91
   6  -3   4  383.83   13.59
   6   3   4  421.62   12.52
  -6   3   4  406.31   11.63
  -6   3  -4  387.69   12.80
   6   3   4  397.71   13.10
   6   3  -4  429.09   14.71
   6  -3  -4  419.06   14.34
  -6  -3   4  379.34   14.07
   6  -3  -4  431.06   15.54
   6  -3   4  415.10   12.51
   6   3   4  406.24   14.90
  -6  -3  -4  421.70   12.66
   6  -3  -4  402.40   12.23
  -6   3  -4  442.35   14.74
  -6   3   4  427.80   14.81
   6   3  -4  422.00   15.28
  -6   3  -4  416.23   15.23
  -6   4   4  129.26    5.99
   6  -4  -4  114.73    9.14
  -6  -4  -4  135.81    9.76
   6  -4  -4  106.41    5.49
  -6  -4   4  120.43   10.04
  -6   4  -4   99.52    6.69
  -6  -4  -4  123.68    5.62
  -6   4  -4  112.53    8.34
  -6   4  -4   92.36    7.91
   6   4   4  126.49    7.02
  -6  -4  -4  122.38    8.60
   6  -4   4  145.14   10.67
   6  -4   4  124.53    7.25
   6   4  -4  110.47    8.33
   6  -4  -4  121.77    7.97
  -6  -4   4  126.55    7.86
  -6   4   4  125.86    9.06
   6   4   4  119.71    8.96
   6   4  -4  120.26    9.13
   6  -5  -4  720.57   21.57
  -6  -5  -4  712.68   24.21
   6   5   4  715.20   20.61
   6  -5   4  673.65   21.60
  -6   5   4  728.37   23.96
  -6  -5   4  746.69   22.24
  -6  -5   4  750.29   25.70
  -6   5   4  709.46   19.78
   6  -5   4  765.58   25.16
   6   5   4  722.42   23.69
   6   5  -4  746.29   23.76
   6   5  -4  717.98   24.05
  -6   5  -4  682.94   23.17
  -6  -5  -4  731.33   23.05
  -6   5  -4  696.34   19.69
   6   5   4  671.66   20.32
  -6   5  -4  708.60   23.95
   6  -5  -4  704.45   24.11
   6   6   4    8.23    4.85
  -6  -6   4   11.77    5.05
  -6   6   4    9.42    6.74
  -6  -6   4    9.35    7.24
   6  -6  -4   12.54    4.81
   6  -6   4   11.98    6.11
  -6  -6  -4   10.94    6.99
   6  -6  -4    6.75    6.67
   6   6   4    9.24    6.31
   6  -6   4    4.39    6.98
  -6   6  -4   11.38    7.26
  -6   6   4    8.75    4.40
  -6   6  -4    6.64    6.51
   6   6  -4    9.72    6.38
   6   6  -4    6.21    5.90
  -6  -6  -4   12.31    6.02
  -6  -7  -4  101.94    9.88
  -6   7  -4  109.96   11.14
   6   7  -4  107.61   11.08
  -6  -7   4  120.96   13.25
  -6  -7  -4   90.34   10.88
   6  -7   4   84.57   11.51
   6   7  -4   81.33   10.09
   6   7   4   85.61   10.32
  -6  -7   4  115.25    8.75
   6  -7  -4  127.67   12.04
  -6   7  -4  108.20   11.25
  -6  -8  -4   17.45    8.51
   6   8  -4   16.51    9.14
  -6  -8   4    6.48    9.75
   6   8   4   16.75    9.42
  -6   8   4   10.54    8.38
  -6  -8  -4    9.19    9.40
   6   8  -4   14.77    8.63
  -6   8  -4   12.84    9.08
  -6   8  -4   13.17    9.10
   6  -8  -4   11.05    8.65
   6  -8   4   27.24   11.02
   6  -9   4  320.52   23.46
   6   9  -4  310.37   22.03
  -6  -9   4  306.78   22.62
   6   9   4  277.44   20.56
  -6  -9  -4  293.99   21.45
   6  -9  -4  316.47   21.37
  -6   9  -4  289.23   21.05
  -6   9   4  299.86   22.33
  -6   9  -4  325.01   22.05
   6   9  -4  278.22   21.49
   6   0  -5 3450.70   84.91
   6   0  -5 3490.62   81.12
   6   0   5 3266.91   81.24
  -6   0   5 3198.80   80.81
   6   0  -5 3254.87   84.62
  -6   0   5 3415.74   81.69
   6   0  -5 3303.52   81.63
   6   0   5 3513.58   84.74
  -6   0   5 3445.85   86.16
  -6   0  -5 3365.57   83.02
  -6   0  -5 3337.17   81.03
  -6   0  -5 3246.43   83.03
  -6   0  -5 3424.52   84.15
  -6   0  -5 3460.63   84.84
  -6  -1   5   40.61    6.51
  -6   1  -5   32.34    4.24
  -6   1  -5   26.12    4.57
  -6  -1  -5   27.80    4.21
  -6   1   5   30.45    4.02
   6   1  -5   49.66    5.73
   6  -1  -5   30.73    4.25
   6  -1   5   26.49    4.96
   6   1  -5   31.13    3.51
   6   1  -5   28.89    4.13
  -6   1   5   32.61    5.29
   6  -1  -5   33.20    3.46
  -6  -1  -5   26.77    4.12
   6   1  -5   27.97    4.78
  -6   1  -5   31.37    4.48
  -6  -1  -5   39.96    5.65
  -6   1  -5   39.39    5.23
  -6   1  -5   24.07    3.41
  -6  -1   5   27.45    2.86
   6   1   5   25.55    4.65
   6  -1  -5   34.52    5.39
  -6  -1  -5   28.67    3.26
   6   1   5   31.57    4.14
  -6   2  -5   70.25    6.51
   6  -2  -5   83.95    5.69
   6   2   5   72.90    5.24
  -6  -2  -5   76.61    7.29
   6   2  -5   86.42    7.73
  -6   2   5   73.05    7.32
  -6   2  -5   92.07    6.79
   6   2   5   85.23    7.65
   6  -2  -5   71.07    6.85
   6  -2   5   81.82    5.14
   6  -2   5   72.36    7.31
   6   2  -5   78.20    4.36
   6   2  -5   59.72    6.22
   6  -2  -5   77.19    4.51
   6   2  -5   82.20    6.51
  -6   2   5   90.93    6.91
  -6  -2  -5   71.29    6.41
  -6  -2  -5   81.48    5.79
  -6  -2   5   79.96    7.98
   6  -2  -5   74.23    4.87
  -6   2  -5   90.11    6.81
  -6   2  -5   89.65    6.10
   6   3  -5   38.57    6.12
   6  -3  -5   44.78    6.07
   6   3  -5   28.82    5.81
   6   3   5   35.59    5.73
  -6  -3  -5   36.63    5.87
  -6  -3   5   33.42    6.72
  -6  -3  -5   28.53    5.26
   6  -3   5   55.47    7.24
   6  -3  -5   34.46    5.89
  -6  -3  -5   39.58    4.11
   6   3   5   36.31    3.65
   6  -3   5   44.95    4.52
   6   3  -5   36.62    5.71
  -6   3  -5   40.55    5.78
  -6   3  -5   34.32    5.80
  -6   3  -5   37.38    5.12
  -6   3   5   37.13    5.57
   6  -3  -5   30.80    3.87
   6  -3  -5   41.83    3.29
   6  -4  -5 1487.74   42.69
   6  -4  -5 1489.77   40.74
  -6   4   5 1522.91   41.65
  -6   4   5 1485.46   36.42
  -6   4  -5 1497.20   42.61
   6   4  -5 1522.87   41.16
   6   4   5 1458.86   37.34
  -6  -4   5 1495.65   43.99
  -6   4  -5 1529.29   41.12
  -6  -4  -5 1502.61   38.11
  -6   4  -5 1518.90   39.30
  -6  -4  -5 1483.68   41.53
   6  -4   5 1466.85   39.30
   6   4  -5 1460.53   42.59
  -6  -4  -5 1457.25   42.03
   6   4   5 1544.85   42.18
   6  -4   5 1519.41   42.76
   6   4  -5 1481.69   41.44
  -6  -5  -5   41.49    7.34
   6   5  -5   49.23    7.53
   6  -5  -5   53.33    6.91
   6  -5   5   44.14    8.27
  -6   5  -5   45.63    8.54
  -6   5   5   26.62    9.98
   6  -5  -5   40.63    7.90
  -6   5  -5   41.10    5.48
  -6  -5  -5   38.86    7.76
   6   5   5   44.87    7.63
   6   5  -5   37.23    7.49
  -6   5  -5   53.51    7.99
   6  -5   5   40.60    6.00
   6   6   5   26.13    7.57
  -6  -6  -5   12.34    7.57
  -6  -6   5   24.13    8.62
   6   6  -5   24.84    7.61
  -6   6  -5   21.13    7.48
  -6   6  -5   12.03    7.09
  -6   6   5   27.53    7.84
   6   6  -5   27.86    7.43
   6  -6   5   31.36    9.76
   6  -6  -5   20.34    6.24
   6  -6  -5   19.29    7.46
   6   6  -5   22.66    7.58
   6   7  -5   45.04    9.17
  -6  -7   5   38.85   10.56
   6   7   5   37.06    9.25
  -6   7  -5   36.56    9.50
   6   7  -5   19.39    8.16
  -6  -7  -5   38.90   10.41
  -6   7  -5   31.78    9.15
  -6   7   5   29.87    9.19
   6  -7   5   34.87   10.50
   6   7  -5   27.94    9.12
  -6  -7  -5   32.66    8.47
   6  -7  -5   41.49    9.89
  -6  -8   5  500.39   25.38
  -6   8  -5  468.90   23.20
   6  -8  -5  461.54   23.29
   6   8  -5  447.21   23.21
   6   8  -5  485.61   24.33
  -6   8   5  487.65   23.66
  -6  -8  -5  470.52   24.71
   6  -8   5  453.91   24.34
   6   8   5  457.67   23.70
  -6  -8  -5  443.21   21.19
  -6   8  -5  486.27   23.95
  -6   9  -5   38.45   12.68
  -6   9   5   45.89   12.80
   6   9  -5   33.85   11.97
  -6  -9   5   41.55   13.94
   6  -9  -5   52.06   20.84
  -6  -9  -5   58.43   13.98
   6  -9   5   49.04   14.42
   6   9  -5   22.72   11.77
   6   9   5   43.47   12.74
  -6   9  -5   36.82   12.61
   6   0  -6  731.31   22.73
  -6   0  -6  723.46   22.50
  -6   0   6  716.11   24.24
   6   0  -6  737.26   20.44
  -6   0   6  714.00   20.63
  -6   0  -6  741.74   23.28
  -6   0  -6  794.03   21.75
  -6   0  -6  719.47   20.43
   6   0  -6  726.71   23.90
   6   0   6  718.39   23.55
  -6  -1  -6    0.80    2.67
  -6  -1   6    0.42    2.71
  -6   1  -6    3.86    3.58
   6  -1   6    7.00    4.75
   6   1  -6    2.07    3.68
   6   1  -6    5.62    4.50
   6  -1  -6    4.83    4.76
  -6   1   6    7.66    4.93
   6  -1  -6    4.66    3.96
  -6  -1  -6    2.44    3.90
  -6   1  -6    1.69    4.15
   6   1  -6    2.23    4.45
  -6  -1   6   -0.57    4.96
  -6   1  -6    0.14    4.43
  -6  -1  -6    9.64    4.16
  -6  -1  -6    3.44    4.30
   6  -1  -6    1.85    2.87
  -6   1   6    1.24    3.43
  -6   1  -6    0.99    3.61
   6   1   6    1.94    4.15
   6  -2   6  717.29   24.26
  -6   2   6  761.07   25.15
   6   2  -6  803.51   24.98
  -6   2  -6  759.33   24.45
  -6   2  -6  781.10   22.90
   6  -2  -6  781.67   24.79
  -6  -2  -6  744.82   23.47
   6   2   6  767.17   20.50
   6   2  -6  786.92   24.79
  -6  -2  -6  747.64   22.18
   6  -2  -6  752.88   19.58
  -6  -2   6  766.50   26.20
   6  -2   6  783.02   21.66
   6   2  -6  769.49   22.86
  -6  -2  -6  756.97   24.43
  -6   2   6  787.36   23.26
  -6   2  -6  742.47   23.55
  -6  -2   6  733.14   19.60
   6  -2  -6  752.87   22.30
   6   2   6  755.46   24.47
   6   3  -6   49.17    7.24
   6   3   6   68.64    8.15
  -6  -3   6   67.52    9.43
   6   3  -6   71.84    8.27
  -6   3  -6   49.78    6.99
   6  -3  -6   60.50    7.35
  -6  -3  -6   57.71    7.21
   6  -3   6   64.24    8.01
  -6   3  -6   61.49    6.69
  -6  -3  -6   65.57    7.92
   6   3  -6   49.81    6.52
  -6   3   6   65.35    7.43
  -6   3  -6   68.75    7.21
   6  -3  -6   56.67    5.42
   6  -3  -6   61.90    7.95
  -6  -3  -6   61.93    5.37
   6   4   6  669.46   23.56
   6  -4   6  648.09   23.36
  -6  -4  -6  697.23   23.79
   6  -4   6  633.61   23.48
   6  -4  -6  696.26   22.95
  -6   4   6  627.55   22.66
  -6   4  -6  673.54   22.83
   6   4  -6  668.18   23.00
  -6   4  -6  669.58   23.82
  -6   4  -6  660.89   21.27
   6   4  -6  671.13   22.72
   6   4  -6  672.20   24.08
   6  -4  -6  676.39   24.17
   6   5  -6   75.49    8.98
  -6   5  -6   71.91    8.07
  -6   5   6  105.93   10.65
   6   5   6   77.06    9.43
  -6  -5   6   93.35   11.68
   6  -5   6   87.60   10.30
  -6  -5  -6   86.40    9.67
  -6   5  -6   82.73    9.58
  -6   5  -6   93.67    9.81
   6  -5  -6   84.10    9.14
   6  -5  -6   93.55   10.92
  -6  -5  -6   84.51    9.42
   6   5  -6   70.49    9.18
   6   5  -6   93.69   10.33
   6  -6  -6  334.20   18.60
   6   6  -6  320.61   16.99
  -6   6  -6  317.33   17.96
  -6  -6   6  328.57   19.82
   6  -6   6  343.50   18.31
   6   6   6  316.24   17.86
   6   6  -6  307.53   17.53
   6   6  -6  279.84   16.98
  -6   6  -6  346.84   17.72
  -6  -6  -6  299.53   16.50
   6  -6  -6  325.34   16.22
  -6   6   6  305.36   17.71
  -6  -6  -6  306.12   18.64
  -6  -7  -6  128.72   13.76
   6  -7   6  153.24   14.45
  -6   7  -6  180.02   14.82
   6  -7  -6  140.04   14.36
   6   7  -6  139.44   13.95
  -6  -7   6  153.56   15.72
   6   7   6  156.78   14.70
  -6   7  -6  130.84   13.53
  -6   7   6  147.64   14.81
   6   7  -6  150.97   14.65
  -6  -7  -6  154.66   13.17
  -6  -8   6  120.35   15.56
   6  -8   6  161.32   16.40
   6  -8  -6  142.46   15.99
   6   8  -6  125.76   15.25
  -6  -8  -6  124.82   13.61
  -6   8  -6  126.00   14.82
  -6   8  -6  118.25   14.13
  -6  -8  -6  146.19   16.43
  -6   8   6  147.01   15.81
   6   8  -6  112.67   13.85
   6   8   6  134.35   15.44
  -6   0  -7  116.15    8.21
   6   0   7   98.23    9.00
   6   0  -7  115.48    7.30
  -6   0  -7   98.99    7.16
  -6   0  -7  104.66    8.68
   6   0  -7  132.26   10.74
  -6   0   7   86.25    9.22
  -6   0   7  103.49    7.11
  -6   0  -7  115.00    9.71
   6   0  -7  101.85    8.92
   6   1  -7    0.41    5.36
   6   1   7    4.10    5.18
  -6  -1  -7   -0.76    4.95
  -6   1   7    4.79    4.47
  -6   1  -7    1.44    4.35
  -6   1  -7    0.60    4.60
   6  -1  -7    0.44    5.73
  -6   1  -7    8.28    5.41
   6  -1   7    2.71    5.21
  -6  -1   7    0.71    6.03
  -6  -1   7    2.25    3.48
   6  -1  -7    6.27    4.81
  -6  -1  -7    0.60    4.41
  -6   1   7    2.35    5.59
   6   1  -7    3.99    5.65
  -6   1  -7   -0.25    4.94
  -6  -1  -7    1.07    5.00
   6   1  -7   10.07    4.53
   6  -2   7  388.74   17.09
  -6   2   7  403.09   17.61
  -6  -2  -7  393.94   14.53
  -6  -2  -7  349.48   16.46
   6  -2   7  379.34   14.03
   6   2  -7  379.14   15.12
  -6   2   7  393.85   15.54
  -6   2  -7  413.57   17.09
  -6   2  -7  387.60   15.14
  -6  -2   7  416.62   21.08
  -6  -2  -7  395.85   16.07
  -6   2  -7  412.19   16.37
   6   2   7  373.23   21.20
   6  -2  -7  377.29   14.64
   6   2  -7  379.29   16.81
   6  -2  -7  399.32   19.56
   6  -3  -7   32.25    8.42
  -6  -3   7   42.80    9.15
  -6   3   7   49.65    7.76
   6   3  -7   21.05    6.93
  -6  -3  -7   35.87    7.31
   6   3  -7   37.97    7.01
  -6   3  -7   33.47    6.80
  -6   3  -7   37.61    7.77
  -6  -3  -7   42.23    7.71
  -6   3  -7   38.26    6.85
   6   3  -7   47.25    8.55
  -6  -3  -7   31.12    7.79
   6  -3  -7   30.11    7.52
   6   3   7   26.55    6.86
   6  -3   7   23.56    7.04
   6  -4  -7   91.01   10.97
  -6  -4  -7  116.21   10.94
   6   4  -7  101.35   10.88
   6  -4   7  104.20   10.71
  -6   4  -7  111.79   10.40
   6   4  -7  109.05   10.34
  -6  -4   7   94.69   11.81
  -6  -4  -7  125.69   11.38
   6   4   7  110.20   11.24
  -6   4  -7  101.85   10.35
   6   4  -7  100.88   10.37
  -6   4   7  119.08   10.90
  -6   4  -7  124.36    9.86
   6  -4  -7  126.28   11.33
   6   5  -7   25.37    8.62
   6   5  -7   30.55    8.70
  -6  -5  -7   29.38    8.85
   6  -5   7   42.86    9.44
   6  -5  -7   31.37    8.48
  -6   5  -7   21.41    8.40
  -6   5   7   20.89    8.44
  -6  -5  -7   21.08    8.10
   6   5   7   29.84    8.75
  -6  -5   7   27.14   10.56
  -6   5  -7   29.78    8.39
   6   5  -7   24.22    8.09
   6  -5  -7   30.76    9.36
  -6   6  -7   56.40   10.57
  -6   6   7   75.98   12.13
   6  -6  -7   64.27   10.15
  -6   6  -7   52.11   10.12
  -6  -6  -7   75.74   11.05
   6   6   7   71.31   11.51
   6  -6   7   62.73   11.17
   6   6  -7   52.38   10.78
   6  -6  -7   55.06   11.28
  -6  -6  -7   90.17   12.17
  -6  -6   7   72.36   12.78
   6   6  -7   56.79   10.98
   6   6  -7   56.03   10.27
   6  -7   7   17.89   11.19
   6   7   7   21.88   10.65
  -6   7  -7    4.38    9.64
   6   7  -7   23.21   10.58
   6   7  -7   24.95   11.80
   6  -7  -7   21.73   11.45
  -6  -7  -7   18.00    9.89
  -6   7  -7   17.14   10.44
  -6   7   7   22.18   10.65
  -6  -7  -7   13.30   10.41
  -6  -7   7   30.92   11.79
  -6   8  -7   70.17   13.66
  -6  -8  -7   88.99   15.85
   6   8  -7   95.37   15.07
   6   8   7   92.87   14.63
   6  -8  -7   82.28   15.36
  -6  -8  -7   83.01   13.75
  -6  -8   7  124.24   16.99
  -6   8   7   77.08   14.07
  -6   0  -8  471.45   17.80
  -6   0  -8  456.73   19.41
  -6   0   8  485.59   20.74
   6   0   8  431.26   18.83
   6   0  -8  445.28   20.08
  -6   0  -8  482.38   18.41
   6   0  -8  461.39   18.73
  -6   0   8  459.42   16.41
  -6   1  -8  358.12   17.09
  -6  -1  -8  355.43   16.24
  -6   1  -8  387.50   15.79
   6  -1   8  384.42   17.30
   6   1  -8  373.26   14.78
   6  -1  -8  397.69   16.24
  -6   1  -8  339.35   17.24
   6   1   8  422.08   18.05
   6   1  -8  378.31   18.42
  -6  -1  -8  368.25   17.51
  -6  -1   8  389.66   18.89
  -6   1  -8  361.78   14.59
  -6   1   8  353.64   15.42
  -6   1   8  366.39   18.10
  -6  -1  -8  385.21   15.71
   6  -1  -8  366.47   18.17
   6  -2  -8  463.37   20.44
  -6  -2  -8  498.74   17.68
  -6   2  -8  465.87   19.69
  -6   2  -8  434.98   19.46
  -6   2  -8  489.74   18.06
   6  -2   8  487.23   20.20
   6   2  -8  474.42   20.68
  -6  -2   8  496.13   22.33
   6  -2  -8  474.07   17.97
  -6   2   8  488.91   20.84
  -6  -2  -8  477.10   19.31
   6   2   8  487.81   20.32
  -6   2   8  464.22   18.75
   6   2  -8  456.49   20.03
   6   2  -8  487.80   18.26
   6  -3   8  592.27   23.05
   6   3   8  565.40   23.23
  -6   3  -8  572.72   23.16
  -6   3   8  608.09   22.48
   6  -3  -8  641.38   24.05
  -6   3  -8  577.26   21.69
  -6  -3  -8  538.59   22.72
   6  -3  -8  544.20   23.67
  -6  -3   8  635.79   25.51
  -6   3  -8  598.92   22.22
   6   3  -8  573.02   23.21
   6   3  -8  572.21   21.52
   6   3  -8  575.14   23.46
  -6  -3  -8  556.05   22.65
   6   4  -8  305.17   18.01
   6   4  -8  282.55   17.37
   6   4   8  322.91   18.13
   6  -4   8  297.07   17.25
  -6   4  -8  319.12   16.92
  -6  -4   8  346.13   20.52
  -6  -4  -8  303.01   17.39
  -6  -4  -8  279.39   17.24
   6  -4  -8  317.42   18.99
  -6   4   8  289.19   17.55
   6  -4  -8  311.35   18.07
  -6   4  -8  287.79   17.82
   6   4  -8  322.20   16.56
  -6  -5  -8   25.15    9.05
   6   5  -8   33.18    9.91
   6   5   8   42.65   10.72
   6   5  -8   23.35    9.02
  -6   5   8   23.84    9.54
   6  -5   8   35.22    9.61
   6   5  -8   39.86   10.12
   6  -5  -8   21.02    9.51
  -6  -5  -8   31.36   10.11
  -6   5  -8   44.55    9.70
  -6   5  -8   40.57   10.15
  -6  -5   8   40.90   11.45
   6  -5  -8   44.90   11.35
   6   6   8  113.06   13.74
  -6   6   8  135.65   14.70
  -6  -6   8  137.20   16.07
   6  -6  -8  105.75   14.19
   6   6  -8  126.91   15.03
   6   6  -8  121.18   13.88
  -6  -6  -8  135.37   14.99
  -6   6  -8  110.20   13.56
  -6  -6  -8  127.60   14.08
   6  -6   8  130.28   13.95
   6   6  -8  133.56   13.93
  -6   6  -8  130.15   14.42
   6  -6  -8  120.84   13.20
   6  -7  -8  314.14   22.88
   6   7   8  338.39   22.48
  -6   7  -8  265.18   23.28
  -6  -7  -8  296.42   23.12
  -6  -7   8  282.62   21.91
   6   7  -8  215.12   18.24
   6   7  -8  311.63   23.26
  -6   7  -8  301.59   22.16
  -6  -7  -8  304.23   20.94
   6   0  -9 1139.70   35.55
  -6   0  -9 1140.30   35.18
   6   0  -9 1037.37   36.54
  -6   0  -9 1143.38   36.48
  -6   0  -9 1145.37   34.66
   6   0   9 1130.59   36.19
  -6   0   9 1181.11   38.31
  -6  -1  -9   -0.11    6.62
  -6  -1  -9    5.15    7.76
   6   1   9    6.62    7.63
  -6   1  -9   -0.22    7.49
   6   1  -9    1.24    7.42
   6  -1  -9   -0.28    8.04
   6  -1   9   -2.55    7.24
  -6  -1   9    5.88    8.65
   6  -1  -9    8.71    7.51
  -6   1  -9    0.34    7.46
  -6   1   9    4.48    6.69
  -6  -1  -9    5.80    7.70
  -6   1   9    2.09    7.73
   6   1  -9    3.45    7.78
  -6  -2  -9   13.87    8.11
  -6  -2   9   10.61    9.05
   6   2   9   14.00    7.90
   6   2  -9   27.14    9.24
   6   2  -9   16.83    8.60
  -6  -2  -9   19.48    8.63
  -6   2  -9   16.11    7.93
   6  -2  -9   27.62    8.93
   6  -2   9   19.88    8.88
  -6   2   9   11.96    8.38
  -6   2  -9   19.50    8.50
  -6   2   9   18.22    7.85
  -6   3  -9   12.70    8.39
   6  -3  -9   12.22    9.50
  -6  -3   9    6.87    9.87
   6   3  -9   13.12    8.61
  -6  -3  -9   12.38    8.79
  -6   3  -9   15.05    8.62
   6   3  -9   14.60    8.43
  -6  -3  -9   14.10    9.22
  -6   3  -9   15.53    8.81
   6  -3  -9   12.12    9.45
   6  -3   9   16.28    8.83
  -6   3   9    4.22    8.41
   6   3   9   18.83    9.22
   6   3  -9   20.43    9.23
   6   4  -9  680.46   27.57
   6   4  -9  690.42   29.33
   6   4  -9  669.96   26.41
  -6   4  -9  685.64   26.70
  -6  -4  -9  661.97   27.69
   6  -4  -9  722.76   28.24
  -6  -4  -9  685.16   27.81
   6  -4   9  691.95   27.17
  -6   4   9  660.88   27.23
   6  -4  -9  739.73   29.64
  -6   4  -9  615.78   27.83
  -6   4  -9  675.95   26.13
  -6  -4   9  743.20   30.89
   6   4   9  702.93   28.48
  -6   5  -9   28.69   10.27
   6  -5   9   42.05   11.32
  -6  -5  -9   32.76   11.37
   6  -5  -9   31.17   12.78
  -6  -5   9   24.01   12.28
  -6   5   9   36.14   11.48
   6   5  -9   13.22   10.45
   6   5  -9   37.33   11.63
  -6  -5  -9   19.16   10.40
   6  -5  -9   20.87   10.93
   6   5   9   31.36   11.35
  -6   5  -9   14.16   10.38
   6   5  -9   17.86   10.98
  -6   6  -9   25.60   11.68
   6   6   9   28.49   12.80
  -6   6  -9   32.34   12.70
  -6  -6  -9   18.87   12.11
  -6  -6   9   29.52   13.62
   6   6  -9   17.26   11.62
  -6  -6  -9   21.38   11.99
   6  -6  -9   23.12   11.92
   6   6  -9   31.52   12.62
   6   6  -9   21.60   11.85
   6  -6  -9   15.55   13.03
  -6   6   9   25.17   12.36
   6   0 -10   32.74   10.08
  -6   0 -10   18.32    9.78
   6   0 -10    2.39    9.10
  -6   0  10   14.89    9.70
   6   0  10   16.89    9.71
  -6   0 -10    7.24    8.92
  -6  -1  10    3.70    9.95
  -6   1 -10    5.09    9.25
   6   1  10    8.46    9.04
  -6   1 -10    1.25    9.08
  -6   1  10    6.63    9.66
   6  -1 -10    5.14   10.00
   6   1 -10   -3.62    9.29
   6  -1  10    4.77    8.91
  -6  -1 -10    4.86    9.39
   6   1 -10   -1.85    9.01
   6   2  10   -0.49    9.62
   6  -2 -10    3.16   10.56
   6   2 -10   -1.46    9.60
  -6  -2 -10   -4.69    9.21
  -6   2  10    5.63   10.55
  -6   2 -10    6.67    9.32
   6  -2  10    1.97    9.21
   6   2 -10    5.85   10.24
   6  -2 -10    0.64    9.85
  -6  -2  10    2.63   10.22
  -6  -2 -10   12.19   10.21
  -6   2 -10   -2.54    9.72
  -6  -3  10   31.28   12.31
  -6  -3 -10   39.87   11.13
   6   3  10   33.61   11.47
  -6   3 -10   21.49   10.92
   6   3 -10   25.85   10.62
   6  -3  10   27.47   10.37
   6   3 -10   25.09   11.60
  -6   3  10   21.38   11.33
  -6  -3 -10   22.78   11.19
  -6   3 -10   43.41   11.05
   6  -3 -10   26.86   11.53
   6  -3 -10   19.97   11.54
  -6  -4 -10    0.63   10.98
  -6   4 -10   -0.98   10.44
  -6  -4  10   11.65   12.43
   6   4 -10    4.01   11.56
   6   4 -10    6.34   11.58
   6  -4 -10    0.37   22.07
  -6   4  10   10.86   11.00
   6   4  10   -0.78   13.10
  -6   4 -10    6.78   10.87
   6  -4 -10    5.84   11.58
   6   0  11  653.07   29.35
   6   0 -11  682.75   30.75
  -6   0  11  665.62   31.78
   6   1  11    8.30   10.86
  -6  -1  11    8.40   12.24
   6  -1 -11    5.34   12.05
   6   1 -11   11.00   11.60
  -6   1 -11    5.70   12.21
  -6  -1 -11    2.41   10.99
  -6   1 -11    2.25   10.70
   6  -1  11   13.95   11.31
   6   1 -11    7.49   11.50
  -6   2 -11   55.89   12.98
  -6   2 -11   37.31   12.62
   6  -2 -11   42.34   12.74
   6   2 -11   58.69   14.73
  -6  -2 -11   39.44   12.38
   6   2 -11   67.68   13.91
   6  -2 -11   48.06   14.20
   7   0   0   -5.80    2.14
   7   0   0   -5.56    2.00
  -7   0   0   -1.46    2.06
  -7   0   0   -0.82    1.93
   7   0   0   -3.83    2.19
  -7   0   0   -5.19    2.65
  -7   0   0   -1.03    2.49
   7   0   0   -6.43    2.17
   7   0   0   -3.04    2.58
  -7   1   0    0.82    1.54
   7  -1   0    1.78    1.86
   7   1   0    1.55    2.13
   7  -1   0    1.94    3.10
   7   1   0    3.23    1.78
  -7  -1   0    0.08    1.69
   7   1   0    3.87    2.06
   7   1   0    0.30    2.86
   7  -1   0    1.45    2.26
  -7  -1   0    2.19    2.18
  -7   1   0    0.03    1.70
   7  -1   0   -0.87    2.34
  -7   1   0    5.06    2.26
   7   1   0    1.98    2.07
   7  -1   0    2.03    2.11
  -7  -1   0    2.53    2.36
   7  -1   0    0.66    2.07
   7   1   0    2.92    2.67
  -7   1   0    0.91    1.86
  -7  -1   0   -2.39    1.96
  -7   2   0    1.82    2.23
  -7  -2   0   -0.25    2.87
  -7  -2   0   -0.64    2.63
  -7   2   0   -5.53    1.86
   7   2   0   -2.78    2.96
  -7  -2   0   -2.68    2.00
   7  -2   0    0.56    1.77
  -7  -2   0   -4.00    2.57
   7  -2   0    0.15    2.46
   7   2   0   -1.83    1.82
   7  -2   0   -1.90    2.02
   7   2   0   -3.24    2.35
  -7  -2   0   -3.59    1.83
   7   2   0   -2.84    3.60
   7   2   0   -2.65    2.22
  -7   2   0   -2.83    2.09
   7  -2   0   -2.30    1.95
   7  -2   0    0.70    2.95
   7  -2   0   -1.98    3.79
  -7   2   0    0.54    2.96
  -7   3   0    3.01    2.05
  -7  -3   0   -0.31    2.76
   7   3   0   -0.75    2.28
   7   3   0    3.46    2.66
  -7   3   0    1.99    3.07
   7  -3   0    0.37    3.04
   7   3   0    0.27    2.07
  -7   3   0    3.11    2.48
   7  -3   0    1.92    2.55
  -7   3   0    2.47    2.40
   7  -3   0    0.66    1.89
   7  -3   0    0.53    2.07
  -7  -3   0    1.13    3.29
   7   4   0    2.60    3.20
   7   4   0   -1.40    2.60
  -7   4   0    0.33    2.85
   7  -4   0    0.06    1.61
  -7   4   0    2.01    2.96
  -7   4   0    3.58    3.72
   7   4   0    1.63    3.15
  -7  -4   0    0.82    4.28
  -7  -4   0   -1.56    3.36
  -7  -4   0    0.47    3.34
   7  -4   0   -0.09    1.65
  -7  -5   0    2.38    3.97
   7   5   0    4.41    3.82
  -7   5   0    6.33    3.65
   7  -5   0    4.14    3.71
  -7   5   0    5.99    5.05
  -7  -5   0    6.01    5.29
   7   5   0    1.99    4.10
  -7   5   0   -0.34    3.49
   7   5   0    0.31    3.29
  -7  -6   0    2.83    4.51
   7  -6   0    0.21    4.58
   7   6   0   -1.52    4.45
  -7   6   0    2.62    4.18
   7   6   0    0.58    4.36
  -7  -6   0    8.19    6.60
  -7   6   0    2.64    5.92
   7   6   0    2.89    4.50
  -7   6   0    2.92    4.88
   7   7   0    0.56    5.25
  -7   7   0    0.75    5.33
   7  -7   0   -0.05    5.65
   7   7   0    1.19    5.64
  -7  -7   0   -0.36    7.15
  -7  -7   0    0.67    5.19
  -7   7   0   -1.06    7.11
  -7   7   0   -0.46    5.88
   7  -8   0    2.96    8.33
   7   8   0    4.30    7.08
   7   8   0   -0.59    7.03
   7   8   0    3.27    7.22
  -7   8   0    3.56    7.50
  -7  -8   0    2.01    9.04
  -7   8   0   -1.35    8.66
   7  -9   0    7.87    9.82
  -7   9   0   10.73    9.24
   7   9   0    0.34    8.63
  -7   9   0    3.79   10.98
  -7  -9   0   10.81   10.86
  -7  10   0    0.88   10.66
  -7  10   0    1.98   12.94
   7  10   0    0.91   10.61
   7 -10   0    2.80   11.77
  -7 -10   0   -0.35   12.94
   7   0   1 9483.71  233.09
  -7   0  -1 9600.80  229.29
   7   0  -1 9361.54  228.53
   7   0  -1 9693.96  232.09
   7   0  -1 9980.08  233.13
   7   0  -1 9390.07  228.32
   7   0   1 9998.70  229.45
   7  -1  -1   63.94    4.35
   7   1  -1   51.77    4.77
   7   1   1   68.99    4.92
  -7  -1   1   59.69    5.00
  -7   1  -1   63.05    4.17
  -7   1   1   63.53    4.04
   7  -1   1   75.98    5.01
  -7   1   1   65.62    4.24
  -7  -1  -1   69.93    4.80
   7  -1   1   62.71    2.87
   7   1  -1   66.96    3.53
  -7   1  -1   71.67    6.09
   7  -1  -1   86.38    6.41
  -7  -1   1   69.26    4.07
   7   1   1   65.91    4.30
  -7  -1   1   77.07    4.33
   7   1  -1   77.07    4.49
   7   1   1   72.41    4.67
   7  -1   1   66.99    4.39
   7  -1  -1   70.04    5.39
  -7  -1  -1   66.74    4.12
   7   1  -1   75.75    4.58
   7   1   1   70.41    4.67
  -7  -1  -1   68.78    3.88
   7  -1   1   65.59    4.79
  -7   1  -1   77.42    4.40
   7   1  -1   72.17    4.75
   7   1   1   71.75    4.44
  -7  -1  -1   66.18    4.58
  -7   1   1   65.11    4.56
   7   1  -1   68.09    5.78
   7  -1  -1   69.96    4.52
  -7   1   1   69.39    4.72
   7  -1  -1   68.64    4.67
  -7   1   1   75.25    4.07
  -7  -1  -1   62.42    4.69
  -7  -1   1   64.00    4.97
  -7   1  -1   76.16    4.58
   7  -1   1   55.31    4.90
  -7  -2   1 1373.65   36.76
   7  -2   1 1337.77   37.35
  -7   2   1 1425.24   36.12
  -7  -2  -1 1456.01   36.87
   7  -2   1 1393.55   34.57
  -7  -2  -1 1363.59   35.88
   7  -2  -1 1393.76   36.27
  -7  -2   1 1423.50   34.63
   7   2   1 1411.94   35.32
   7  -2  -1 1440.32   37.05
   7  -2   1 1383.95   34.58
   7   2   1 1331.15   36.37
   7  -2  -1 1381.81   36.89
   7  -2   1 1381.23   35.12
   7   2   1 1460.84   36.02
   7  -2  -1 1424.74   35.63
  -7  -2  -1 1456.80   37.10
   7   2   1 1309.37   36.67
   7   2  -1 1377.77   39.07
   7   2  -1 1422.63   36.01
  -7   2   1 1411.31   36.28
   7  -2   1 1472.71   38.10
   7   2  -1 1391.04   34.40
  -7   2   1 1452.56   35.74
  -7   2  -1 1446.27   36.90
  -7  -2  -1 1423.11   36.25
  -7   2   1 1414.43   35.36
  -7   2   1 1422.75   36.82
  -7  -2   1 1451.52   37.81
  -7   2  -1 1407.81   35.87
   7   2  -1 1434.19   37.17
  -7   2  -1 1436.86   35.44
   7  -2  -1 1407.10   35.51
  -7  -3  -1   48.65    4.71
  -7   3   1   46.98    4.15
   7  -3  -1   49.28    4.33
  -7  -3  -1   60.13    4.97
   7  -3  -1   48.08    3.81
  -7  -3   1   48.31    3.71
  -7  -3  -1   64.40    5.56
  -7   3   1   60.85    5.68
   7   3  -1   47.24    3.43
   7  -3  -1   55.87    5.10
  -7   3  -1   64.45    5.17
   7   3   1   42.42    4.19
   7   3   1   60.19    4.87
  -7   3  -1   48.89    3.53
   7  -3   1   36.61    5.01
  -7   3  -1   52.73    4.99
   7  -3  -1   55.90    4.61
   7  -3   1   46.49    3.43
   7  -3   1   49.33    3.72
  -7   3   1   55.07    3.98
  -7  -3   1   52.37    5.02
  -7  -3   1   40.96    5.18
   7   3  -1   54.84    4.99
  -7  -3  -1   59.42    5.81
   7   3  -1   57.03    5.01
  -7   3   1   57.31    4.35
   7  -4  -1 3809.26   92.94
  -7   4   1 3959.77   93.71
   7   4   1 3939.12   96.09
   7  -4  -1 3664.63   95.54
  -7  -4  -1 4020.39   95.81
  -7  -4   1 4026.12   95.68
   7   4  -1 4048.72   97.09
   7  -4  -1 3820.10   96.07
  -7   4  -1 3937.74   96.78
   7  -4   1 3920.15   95.20
  -7  -4   1 3896.12   98.25
   7   4  -1 3832.73   94.54
   7   4   1 3895.02   93.96
  -7  -4  -1 3987.16   97.91
  -7   4  -1 3922.64   94.45
  -7   4  -1 3856.24   96.66
  -7   4   1 3746.76   96.19
   7  -4  -1 3891.31   92.93
   7   4  -1 3830.58   93.28
   7   4   1 3858.81   94.68
  -7  -4   1 3758.44   93.17
  -7   4  -1 3700.78   94.84
   7  -5  -1   67.17    6.79
  -7   5   1   63.61    5.39
  -7  -5   1   51.72    5.71
  -7   5  -1   63.69    6.34
  -7   5  -1   47.87    5.80
   7   5  -1   52.49    5.68
   7  -5  -1   51.33    3.62
  -7   5   1   57.99    5.69
   7   5   1   56.10    5.97
   7   5   1   59.85    5.94
   7   5  -1   67.55    6.37
  -7   5   1   93.16    8.34
  -7   5  -1   40.52    6.53
  -7  -5  -1   72.36    6.91
  -7  -5  -1   79.68    8.61
   7   5  -1   44.79    5.92
   7   5   1   44.93    5.10
  -7  -5   1   66.98    7.87
   7  -5   1   53.18    5.67
  -7   6   1  512.07   17.82
  -7  -6   1  523.73   17.58
   7   6   1  494.01   17.87
  -7   6   1  489.09   16.33
  -7   6   1  502.95   19.87
  -7  -6  -1  499.86   20.39
   7  -6  -1  528.18   18.62
  -7   6  -1  515.52   17.99
  -7  -6  -1  551.18   18.39
   7   6  -1  523.19   16.79
  -7   6  -1  503.89   18.75
  -7  -6   1  500.24   20.63
   7   6  -1  479.56   18.35
   7  -6   1  496.37   18.08
  -7   6  -1  504.54   20.08
   7   6   1  534.23   18.10
   7   6   1  518.89   16.83
   7   6  -1  509.06   18.14
   7  -7  -1    8.76    6.34
   7   7   1   16.91    5.66
  -7  -7  -1   17.85    8.31
  -7  -7   1   17.80    5.65
  -7   7  -1   21.62    8.29
   7   7   1    7.67    6.22
  -7  -7  -1   11.76    5.96
   7   7  -1   17.12    6.49
  -7   7   1    7.26    7.21
   7   7  -1   13.24    6.43
   7  -7   1    8.55    6.50
  -7   7  -1   11.51    6.47
  -7   7   1   11.67    5.81
  -7   7   1   19.85    5.33
  -7   7  -1   15.64    6.31
   7   7   1    9.54    5.85
  -7  -7   1    8.78    7.84
   7   7  -1   15.37    6.04
  -7  -8   1 1118.74   38.55
  -7   8   1 1138.04   34.25
  -7   8  -1 1164.04   37.65
   7   8  -1 1158.25   35.73
  -7   8   1 1188.97   37.91
   7   8   1 1054.87   37.62
   7  -8  -1 1112.12   35.92
  -7   8  -1 1143.03   34.52
  -7  -8  -1 1135.70   38.60
   7  -8   1 1089.86   35.53
   7   8  -1 1135.55   34.73
  -7   8  -1 1087.16   35.07
   7   8   1 1093.80   34.54
   7  -9  -1   15.60    9.92
  -7  -9  -1   26.68   12.54
   7   9  -1   13.30    9.36
   7   9   1    5.38    9.13
  -7   9   1   17.01   11.58
  -7   9  -1   15.18   11.61
  -7   9   1   12.01    8.53
   7  -9   1    4.74    9.92
   7   9   1   24.25    9.69
  -7  -9   1   23.14   11.10
  -7   9  -1   12.24    9.38
   7  10  -1   25.53   11.86
  -7  10  -1   27.50   15.01
  -7  10   1   41.41   11.84
   7  10   1   25.12   11.46
  -7 -10  -1   30.83   13.77
  -7  10  -1   46.94   13.05
  -7 -10   1   30.10   12.61
   7 -10  -1   33.26   13.19
  -7   0  -2   31.57    2.49
   7   0   2   26.87    2.16
  -7   0   2   29.54    3.70
   7   0   2   29.87    3.57
  -7   0  -2   33.52    3.19
  -7   0   2   49.12    4.63
   7   0   2   33.77    4.03
   7   0  -2   24.83    3.23
  -7   0   2   25.54    3.51
   7   0   2   22.33    3.44
   7   0   2   23.53    3.57
  -7   0  -2   22.18    3.17
   7   0  -2   27.53    2.82
   7   0  -2   20.99    4.37
   7   0  -2   24.29    3.01
  -7   0   2   31.69    2.89
   7   0  -2   27.67    3.11
  -7   0  -2   30.55    4.40
   7   0  -2   35.59    4.55
   7  -1  -2 1000.69   25.75
   7  -1   2  958.22   26.27
  -7  -1  -2  972.62   27.08
   7  -1  -2 1020.69   27.44
  -7  -1   2 1011.31   28.03
   7   1  -2 1018.06   28.53
  -7  -1   2  974.56   26.30
   7   1  -2 1037.50   27.45
  -7  -1  -2 1038.09   27.22
   7  -1  -2 1015.78   26.68
   7   1   2  975.67   26.82
  -7   1   2 1040.11   26.51
  -7   1   2 1016.62   27.24
   7   1   2  962.61   26.07
  -7   1  -2 1039.68   27.34
  -7  -1   2  996.81   27.20
  -7   1   2 1047.90   26.59
  -7   1   2 1011.60   25.56
   7   1  -2 1012.82   24.81
   7   1   2 1019.58   27.20
   7  -1  -2  994.62   26.39
   7  -1   2 1001.77   26.42
  -7   1  -2 1043.99   26.33
  -7  -1  -2 1010.15   26.76
  -7  -1  -2  990.65   25.68
  -7   1  -2 1003.68   26.45
   7   1  -2  984.72   24.64
  -7  -1  -2 1021.09   26.29
   7  -1   2 1010.17   28.06
   7   1   2  988.90   25.87
   7  -1  -2  967.31   26.76
  -7   1   2 1004.68   26.90
  -7   2   2  255.88    8.54
   7  -2  -2  237.93   10.09
  -7  -2   2  247.96    9.71
  -7  -2  -2  236.33    8.63
   7  -2  -2  244.50    9.20
   7  -2  -2  237.96    8.72
  -7   2   2  257.71    9.55
  -7  -2   2  251.19   10.75
  -7   2   2  263.33    9.62
   7   2   2  251.00    9.15
   7  -2  -2  255.37    8.92
   7  -2   2  251.50    8.49
   7  -2   2  248.75   10.86
  -7   2   2  260.36    9.05
   7   2  -2  256.32    9.84
  -7   2  -2  250.46    9.66
   7   2   2  246.41    9.66
   7   2   2  252.79    9.48
   7   2   2  253.00    8.93
  -7   2   2  242.09    8.29
   7   2  -2  265.19    9.50
  -7  -2  -2  256.38    9.74
  -7   2  -2  239.59    9.24
  -7   2  -2  246.22    8.51
   7   2   2  241.04    8.66
  -7  -2  -2  274.62    9.79
  -7  -3  -2 1762.28   43.14
   7   3  -2 1760.11   43.65
  -7   3  -2 1608.10   41.61
   7  -3   2 1627.68   41.99
   7  -3   2 1768.11   46.05
   7  -3  -2 1660.45   42.52
  -7   3   2 1675.62   42.95
   7  -3  -2 1700.12   42.83
   7   3   2 1687.24   42.48
  -7  -3   2 1738.25   46.02
   7  -3  -2 1584.12   42.20
  -7   3   2 1656.32   44.20
  -7  -3   2 1651.22   40.58
   7   3  -2 1622.96   40.54
  -7  -3   2 1650.68   43.84
  -7  -3  -2 1801.77   45.01
  -7   3   2 1746.96   42.65
   7  -3  -2 1713.88   44.33
   7  -3   2 1621.33   41.65
  -7  -3  -2 1745.57   44.23
   7   3   2 1729.09   43.75
   7  -3  -2 1622.31   42.95
  -7   3  -2 1680.27   41.87
  -7   3  -2 1789.70   43.67
   7   3  -2 1788.79   44.99
  -7   3  -2 1728.65   44.65
   7  -4   2   70.30    4.11
  -7   4  -2   78.14    5.42
   7   4   2   85.94    6.10
   7  -4   2   79.95    5.80
   7   4  -2   75.24    6.39
  -7   4   2   83.13    7.10
   7  -4  -2   76.19    5.34
   7  -4  -2   82.13    5.34
  -7   4   2   89.06    5.99
  -7  -4  -2   98.37    8.29
  -7  -4   2   85.08    8.21
  -7  -4   2   84.39    6.60
  -7  -4   2   70.00    4.47
   7  -4   2  101.17    8.94
  -7   4  -2   76.03    4.49
   7  -4  -2   66.11    6.19
   7   4  -2   81.49    4.49
   7   4  -2   76.47    6.50
  -7   4   2   75.69    5.20
  -7   4  -2   77.43    6.64
   7  -4  -2   79.28    5.58
   7   4   2   83.42    6.55
   7   4   2   73.21    5.74
  -7  -4  -2  100.42    7.36
  -7   4  -2   82.00    6.86
  -7  -5  -2    1.53    4.37
  -7   5   2    3.23    3.02
   7  -5  -2    1.95    2.72
   7   5   2    1.82    3.83
   7   5   2    2.14    3.30
  -7  -5  -2   15.95    5.66
   7   5   2    1.55    4.01
  -7   5  -2    5.93    4.66
  -7   5  -2    6.31    4.50
   7   5  -2   -0.26    4.11
  -7  -5   2   -1.13    5.00
   7  -5  -2    7.39    4.50
  -7  -5   2    1.16    3.74
   7   5  -2    2.59    4.43
  -7   5   2    4.06    3.60
  -7   5   2   -1.20    4.39
   7  -5   2   -0.85    5.25
   7   5  -2    1.53    3.01
   7  -5   2    2.89    3.87
   7   6   2  116.31    8.52
   7   6  -2   86.05    8.16
  -7   6  -2  104.36    9.11
   7  -6  -2  118.12    9.58
   7  -6   2  126.60    9.42
  -7   6   2  119.74    8.75
  -7  -6  -2  114.86    8.84
   7   6   2  103.98    8.64
   7   6   2  101.95    7.02
  -7  -6   2   97.04   10.73
  -7  -6   2  115.15    8.30
   7   6  -2  117.87    7.98
  -7   6   2   89.28    9.10
   7   6  -2   98.71    9.19
  -7   6  -2  121.26   11.39
  -7   6  -2  112.34    9.24
  -7  -6  -2  106.74   10.77
   7  -7   2 1057.35   33.20
   7   7   2 1065.80   33.14
  -7   7  -2 1094.40   33.70
   7   7  -2 1072.23   33.41
  -7   7   2 1144.00   35.39
  -7   7   2 1089.90   31.76
   7  -7  -2 1115.59   38.22
  -7  -7   2 1095.07   36.32
  -7   7  -2 1081.10   35.64
  -7  -7  -2 1095.67   35.97
   7   7   2 1048.66   32.00
  -7   7  -2 1093.20   33.40
   7   7  -2 1085.27   33.75
  -7  -7  -2 1134.20   32.61
  -7  -7   2 1161.79   31.92
  -7  -8  -2   27.93    8.48
   7   8   2    8.17    7.46
  -7  -8   2   14.22    9.31
  -7   8  -2   14.12    8.06
  -7   8  -2   11.22    8.23
  -7   8  -2   18.75   10.27
  -7  -8  -2   13.19    9.53
   7  -8  -2   15.14    8.26
  -7   8   2   18.13    8.93
   7  -8   2   14.22    8.52
   7   8  -2   13.00    8.57
   7   8   2    9.83    8.13
  -7   8   2    8.55    7.88
   7   8  -2   18.51    8.18
  -7   9   2   -1.03    8.53
   7  -9  -2    0.32    9.61
   7   9   2    3.26    9.89
   7   9  -2    7.77    9.75
  -7  -9   2    3.90   10.66
  -7   9  -2    1.84    9.70
   7   9   2    3.65    9.24
  -7  -9  -2   -4.76   10.90
  -7   9  -2    0.13    9.46
   7   9  -2    3.05    9.29
  -7   9  -2    4.11   11.31
  -7   9   2   -2.44   10.01
   7 -10  -2    5.61   12.25
   7 -10   2    5.75   13.81
  -7   0  -3   63.54    3.66
  -7   0   3   74.53    5.32
   7   0  -3   70.85    5.11
   7   0  -3   61.25    4.53
   7   0  -3   66.13    4.75
  -7   0  -3   74.95    5.13
  -7   0   3   73.38    4.11
  -7   0  -3   56.45    4.82
  -7   0  -3   69.40    3.77
  -7   0   3   54.61    5.25
   7   0   3   54.57    5.11
   7   0   3   77.07    5.28
   7   0  -3   77.46    4.34
   7   1   3   46.14    4.17
  -7   1   3   48.01    4.60
  -7  -1  -3   58.00    5.41
  -7  -1  -3   53.42    4.20
   7  -1   3   56.65    5.05
  -7   1  -3   52.30    4.44
  -7   1  -3   48.23    4.42
   7   1   3   44.32    4.65
   7   1  -3   37.30    3.88
  -7  -1  -3   60.05    4.67
   7  -1  -3   46.22    3.89
  -7  -1   3   48.66    4.74
  -7   1   3   58.55    5.50
  -7   1   3   53.59    4.34
   7  -1  -3   43.15    4.42
   7   1   3   53.88    4.19
   7  -1  -3   44.23    3.75
   7   1   3   48.40    4.72
   7   1  -3   45.70    4.75
  -7   1  -3   44.85    4.38
   7  -1  -3   56.53    4.61
   7   1  -3   43.81    2.56
  -7  -1  -3   49.12    3.78
  -7  -1   3   50.83    5.56
   7  -1  -3   46.85    4.37
   7  -1   3   56.83    6.01
   7  -2  -3 1190.06   31.59
  -7  -2   3 1211.81   32.72
  -7   2   3 1258.18   32.44
   7   2   3 1198.44   31.06
  -7  -2  -3 1215.97   32.00
  -7   2   3 1219.17   30.34
  -7  -2   3 1223.21   34.46
   7  -2  -3 1159.70   30.54
   7   2   3 1150.83   31.84
  -7   2  -3 1241.50   31.60
   7   2  -3 1217.05   32.06
  -7   2  -3 1225.83   31.94
   7   2   3 1186.84   32.72
  -7   2  -3 1205.80   33.11
  -7  -2  -3 1226.82   32.45
   7  -2   3 1218.56   34.07
  -7   2   3 1235.10   33.21
   7  -2   3 1147.87   31.31
   7  -2  -3 1273.38   32.66
   7   2  -3 1239.88   33.38
   7   2   3 1157.65   32.21
  -7  -2  -3 1223.66   32.88
  -7   3  -3  121.25    7.40
  -7   3   3  124.94    5.76
   7  -3  -3  107.56    6.07
   7   3   3  121.68    6.18
  -7  -3  -3  125.38    7.91
  -7  -3  -3  126.05    7.80
  -7   3   3  113.75    7.48
   7  -3   3  112.36    8.74
   7   3   3   79.83    5.80
   7   3  -3  130.08    8.06
   7  -3  -3  126.36    7.00
   7   3  -3  126.23    7.48
  -7  -3  -3  126.30    5.87
   7  -3   3  101.82    6.17
  -7   3   3  116.67    5.48
  -7   3  -3  125.75    6.26
  -7  -3   3  114.59    8.78
   7  -3  -3  119.81    6.83
  -7   3  -3  119.25    7.59
   7  -3   3  110.32    5.02
   7  -3  -3  113.84    7.51
  -7   3  -3  106.47    4.94
   7   3   3  128.59    7.50
   7   3   3  116.08    6.86
  -7  -3   3  116.51    7.15
  -7   4   3   65.14    4.71
   7  -4  -3   76.86    7.16
  -7   4  -3   63.98    4.46
   7   4  -3   62.73    6.67
  -7   4   3   47.41    6.19
  -7  -4   3   71.42    6.32
  -7   4  -3   72.87    5.38
  -7   4   3   62.14    4.82
  -7  -4  -3   70.12    4.60
   7  -4  -3   74.62    5.73
  -7   4  -3   73.61    7.04
  -7  -4  -3   78.25    7.42
   7  -4   3   60.85    5.00
   7   4   3   64.75    6.52
  -7  -4   3   84.02    8.61
   7  -4   3   60.24    7.91
  -7  -4  -3   53.79    5.82
   7   4  -3   57.26    6.56
   7  -4   3   59.97    4.88
   7  -4  -3   51.27    5.30
  -7   4  -3   86.22    7.62
   7   4   3   71.26    5.46
   7   4   3   58.49    5.48
  -7   5   3   74.90    5.28
   7   5   3   91.65    6.91
   7   5  -3   73.01    7.54
   7   5   3   75.34    7.67
  -7   5   3   73.63    7.87
  -7  -5   3   90.32    7.35
   7   5  -3   83.12    8.13
  -7  -5  -3   72.75    7.27
   7  -5  -3   92.73    8.27
  -7  -5   3   85.12    9.33
   7  -5   3   88.13    9.56
  -7   5  -3   81.81    7.88
  -7   5   3   85.46    6.21
   7  -5  -3   65.98    5.72
  -7  -5  -3  100.22    9.15
  -7   5  -3   83.23    7.98
   7   5   3   83.09    6.25
   7   6  -3  353.19   16.36
   7   6   3  353.92   14.37
  -7   6   3  360.76   13.67
  -7  -6   3  367.66   14.52
  -7  -6  -3  383.61   15.32
  -7   6   3  346.20   16.65
  -7  -6   3  346.49   17.75
   7   6  -3  379.38   16.22
  -7   6  -3  347.29   16.23
   7  -6  -3  371.97   16.38
   7   6   3  339.71   15.58
   7  -6   3  336.79   14.68
   7  -6   3  357.67   17.70
  -7  -6  -3  320.46   19.03
  -7   6  -3  386.77   16.40
  -7   7  -3   17.87    7.58
  -7  -7   3   29.82    6.53
   7   7   3   36.51    8.03
   7  -7   3   23.42    9.29
   7  -7   3   35.40    7.79
  -7  -7  -3   24.76    7.22
   7  -7  -3   30.02    8.15
   7   7   3   29.94    6.64
  -7  -7   3   38.58    9.67
  -7   7   3   21.68    7.68
   7   7  -3   22.20    7.80
  -7  -7  -3   30.86    9.01
  -7   7   3   24.51    6.19
   7   7  -3   34.98    8.10
  -7   7  -3   17.33    7.61
  -7  -8  -3   30.95    8.74
   7   8  -3   18.38    8.44
  -7   8  -3   21.98    9.35
   7   8  -3   30.17    9.32
  -7   8   3   32.60    9.26
  -7   8  -3   22.93    8.90
  -7  -8  -3   43.57   11.21
   7   8   3   38.11    9.39
   7  -8  -3   33.14    9.82
   7  -8   3   24.72   10.91
  -7  -8   3   16.46    9.64
   7   8   3   31.68    8.91
  -7  -9   3    2.51   10.77
  -7   9   3    6.56   10.23
  -7   9  -3   11.40   10.81
   7  -9   3   11.57   12.80
   7  -9  -3   -3.73    9.59
  -7  -9  -3    4.50   11.27
   7   9  -3   -0.45    9.56
  -7   9  -3    3.12   10.02
   7   9  -3   14.96   10.23
   7   9   3    5.39    9.84
  -7   0  -4   16.50    3.02
   7   0  -4   17.25    3.51
  -7   0   4   15.09    2.55
  -7   0  -4   15.64    3.51
  -7   0  -4   11.93    3.74
   7   0   4   24.31    4.61
  -7   0   4   12.69    3.98
  -7   0  -4   12.35    2.93
  -7   0  -4   15.53    2.70
   7   0  -4   16.89    2.97
   7   0  -4   10.89    3.34
  -7   0   4    8.78    3.28
   7  -1  -4    3.93    3.00
  -7   1  -4    3.15    3.30
   7   1  -4    4.68    1.87
  -7  -1  -4    3.55    2.73
  -7   1  -4    5.84    3.38
  -7  -1  -4    5.69    3.71
   7   1  -4    3.83    3.39
   7  -1  -4    4.94    3.72
   7  -1   4    5.26    4.00
  -7  -1   4    8.80    3.53
   7   1   4    1.63    3.18
  -7   1   4    3.24    3.79
   7   1  -4    5.87    2.97
  -7  -1   4    6.69    1.86
  -7  -1  -4    7.15    3.41
  -7   1  -4    6.90    2.06
   7  -1  -4    1.50    2.45
   7  -1  -4   13.60    4.00
   7  -1  -4    3.65    2.82
  -7  -1   4   10.89    4.42
  -7  -1  -4    4.93    2.52
  -7   1  -4    3.70    2.38
  -7  -1  -4    6.62    3.00
  -7   1  -4    4.14    2.95
   7   1   4    3.94    3.24
   7  -2  -4    5.58    3.37
   7   2   4    4.57    3.27
   7   2  -4    1.46    3.13
   7   2   4    2.22    3.46
  -7   2  -4    2.53    3.13
  -7  -2  -4    2.58    2.65
  -7   2  -4    2.28    3.59
   7  -2   4    2.63    1.70
  -7   2  -4    5.24    2.50
   7  -2  -4    1.27    3.42
   7   2  -4    3.00    3.60
  -7  -2   4    0.26    2.94
   7  -2  -4    7.60    3.00
   7  -2   4   -0.76    4.03
  -7  -2  -4    1.97    3.20
  -7   2   4    4.75    3.19
  -7  -2  -4    2.34    3.39
  -7   2   4   -0.20    3.33
  -7  -2   4    3.55    4.39
   7   2   4    0.84    2.75
   7  -2  -4    4.41    2.45
   7  -2  -4    4.47    3.13
  -7   2  -4    4.61    3.26
   7  -3   4   78.05    7.94
   7  -3   4   61.47    4.39
  -7   3  -4   60.64    6.55
   7   3  -4   78.38    7.28
   7  -3  -4   79.34    5.39
  -7  -3  -4   60.01    6.34
  -7   3  -4   69.92    6.41
  -7  -3   4   80.21    6.70
   7   3   4   62.08    5.30
   7  -3  -4   71.60    5.17
   7   3   4   61.95    6.49
  -7   3  -4   67.21    5.65
  -7   3  -4   72.98    4.63
  -7   3   4   89.88    7.19
   7  -3  -4   73.15    6.54
   7   3  -4   64.21    6.37
  -7  -3  -4   61.03    6.44
   7  -3  -4   55.21    6.44
  -7  -3   4   67.54    8.14
   7   3   4   65.94    5.74
  -7  -3  -4   72.06    6.32
   7  -3  -4   63.14    5.06
  -7   3   4   67.79    4.51
   7  -4  -4   49.26    4.18
   7  -4   4   53.52    7.52
   7   4   4   44.10    4.65
   7  -4   4   46.68    4.65
  -7   4  -4   34.82    4.68
  -7  -4   4   35.17    6.72
  -7  -4  -4   56.74    6.98
  -7  -4  -4   54.42    6.60
   7   4  -4   57.02    6.71
  -7   4  -4   42.98    5.94
   7   4  -4   42.79    6.40
  -7  -4   4   54.79    6.00
  -7  -4  -4   48.79    4.18
   7  -4  -4   44.67    6.67
  -7   4  -4   38.75    6.25
  -7   4   4   65.42    4.71
  -7   4   4   43.81    6.16
   7   4   4   56.61    6.77
   7  -4  -4   55.82    5.99
  -7   5  -4  231.48   13.18
   7   5   4  246.38   13.19
   7   5   4  241.42   10.82
  -7  -5   4  266.20   11.99
  -7   5   4  248.06    9.87
   7  -5  -4  269.62   13.73
   7   5  -4  264.92   13.56
   7   5  -4  242.78   13.14
   7   5   4  261.69    9.97
  -7  -5  -4  262.25   12.66
   7  -5  -4  234.56   11.23
  -7   5   4  285.03   13.83
  -7  -5   4  289.86   15.34
  -7  -5  -4  278.01   14.17
   7  -5   4  248.53   14.81
  -7   5  -4  257.50   13.31
  -7   6  -4   -0.91    6.14
  -7  -6   4    3.13    7.31
   7  -6  -4    2.24    4.88
   7  -6  -4    3.97    6.47
  -7  -6  -4    2.43    6.20
  -7   6   4   -3.45    5.66
   7   6   4    5.36    5.03
   7   6   4    0.23    6.08
   7   6  -4    2.62    6.06
  -7   6   4    2.49    4.45
   7   6  -4   -2.37    6.28
   7  -6   4    1.35    7.86
  -7   6  -4    5.89    6.44
  -7  -6   4    0.09    4.98
  -7  -6  -4    3.27    5.78
   7  -7  -4  263.92   16.52
   7  -7   4  252.80   17.21
  -7  -7   4  272.16   18.12
  -7  -7  -4  275.21   21.89
  -7  -7  -4  229.50   16.53
   7   7  -4  239.22   16.11
  -7   7  -4  263.88   16.81
  -7  -7   4  269.82   13.77
   7   7   4  248.41   15.41
  -7   7  -4  259.05   16.30
   7   7  -4  266.84   16.61
   7  -8  -4    5.84    8.99
   7   8  -4    6.70    8.80
  -7  -8  -4   10.38    8.43
  -7  -8   4    6.22    9.62
  -7  -8  -4    2.03    9.97
   7  -8   4    4.30   10.21
  -7   8   4    8.13    8.80
  -7   8  -4    8.24    9.32
   7   8  -4    3.87    8.67
   7   8   4    6.57    9.03
  -7   8  -4   -2.01    8.91
   7   9   4  204.11   17.46
  -7  -9  -4  228.14   20.36
   7   9  -4  204.27   17.62
  -7   9   4  194.01   18.34
  -7   9  -4  246.07   19.11
   7  -9  -4  220.98   18.73
   7   9  -4  240.97   18.52
  -7   9  -4  207.24   17.38
  -7  -9   4  262.94   21.33
   7  -9   4  273.15   21.17
   7   0   5 3719.50   91.57
  -7   0  -5 3808.04   91.11
   7   0  -5 3664.26   91.65
   7   0  -5 3675.58   91.84
  -7   0   5 3643.59   93.00
   7   0  -5 3668.31   87.89
  -7   0  -5 3722.49   87.95
  -7   0  -5 3615.94   91.61
  -7   0  -5 3527.30   89.52
  -7   0   5 3596.00   88.22
   7   0  -5 3514.81   88.15
  -7   0  -5 3655.32   89.52
   7   1  -5   23.43    5.18
  -7  -1  -5   23.32    3.59
   7   1  -5   22.06    4.84
   7  -1  -5   19.87    3.29
  -7   1  -5   23.75    4.63
  -7  -1  -5   23.36    4.10
  -7   1  -5   23.45    4.74
  -7   1   5   21.03    3.90
   7   1   5   21.36    4.97
  -7  -1  -5   21.50    4.44
   7   1   5   24.91    4.47
  -7   1  -5   27.85    4.35
  -7  -1   5   14.83    5.31
  -7  -1  -5   28.08    4.41
  -7   1  -5   28.74    3.41
   7  -1  -5   19.96    5.09
   7  -1  -5   24.49    3.89
  -7   1  -5   25.81    4.17
   7   1  -5   25.97    3.27
  -7   1   5   21.84    5.04
   7  -1   5   25.17    5.29
  -7  -1  -5   22.55    5.40
   7  -1  -5   24.82    4.35
  -7  -1   5   24.43    2.76
   7   1  -5   34.53    4.61
   7  -2  -5  355.02   10.76
  -7   2  -5  353.29   14.06
  -7   2  -5  354.67   13.09
   7   2  -5  358.61   14.28
   7  -2  -5  340.23   14.09
   7   2  -5  351.72   13.17
  -7   2  -5  347.99   13.23
   7   2   5  338.55   11.86
   7   2   5  343.94   14.10
   7  -2  -5  355.53   12.34
  -7   2   5  325.45   14.43
   7  -2   5  350.41   10.61
  -7  -2  -5  360.58   12.26
   7  -2   5  360.29   14.90
  -7  -2   5  338.64   15.39
  -7  -2  -5  351.64   14.17
  -7  -2  -5  323.53   12.88
  -7   2   5  341.32   12.94
   7   2   5  364.70   11.68
   7  -3  -5   11.74    2.95
  -7   3   5   17.62    5.00
   7  -3  -5   19.30    5.47
  -7  -3  -5   13.78    3.58
   7  -3  -5   18.76    5.23
   7  -3  -5   15.55    3.81
  -7   3  -5    9.60    4.49
  -7   3  -5   10.90    4.88
   7   3  -5   12.93    4.87
   7  -3   5   16.09    3.30
  -7  -3   5   27.31    5.30
  -7  -3  -5    8.78    4.62
   7   3  -5   19.73    5.28
  -7  -3   5   12.44    6.07
   7  -3   5   11.98    5.72
  -7   3  -5   15.76    4.63
   7   3   5   13.70    3.40
  -7  -3  -5   13.77    5.08
   7   3   5    9.80    4.46
   7  -4  -5 1596.39   43.09
  -7  -4   5 1647.80   46.73
  -7   4  -5 1710.36   43.73
   7  -4   5 1492.58   44.89
  -7   4   5 1609.08   38.92
   7   4  -5 1558.57   44.86
  -7  -4  -5 1621.12   44.14
  -7  -4  -5 1629.29   40.74
  -7  -4   5 1589.23   43.16
   7  -4   5 1557.32   40.91
   7   4   5 1421.45   41.94
  -7   4   5 1541.19   43.76
  -7   4  -5 1603.39   44.89
  -7  -4  -5 1576.82   44.31
  -7   4  -5 1573.50   41.45
   7   4  -5 1615.15   43.56
   7   4   5 1586.05   44.40
   7  -4  -5 1600.75   45.07
  -7   5   5   29.45    6.86
  -7  -5  -5   28.90    6.68
   7   5  -5   19.25    6.45
   7  -5  -5   39.53    6.55
  -7   5  -5   25.93    7.04
  -7  -5  -5   17.81    7.09
   7   5   5   38.62    7.63
  -7   5  -5   25.78    6.99
   7  -5   5   26.60    7.76
   7   5  -5   33.54    6.99
  -7  -5   5   34.58    8.58
  -7  -5   5   33.47    6.10
   7  -5  -5   36.56    7.82
   7  -6  -5   65.31   10.16
  -7   6  -5   56.65    9.24
   7   6  -5   41.12    8.84
  -7  -6  -5   49.09    9.42
  -7   6  -5   60.90    9.70
   7  -6  -5   47.87    7.62
  -7  -6   5   69.51   11.17
  -7   6   5   65.40    9.63
  -7  -6  -5   66.16    8.83
   7   6  -5   48.29    8.63
   7  -6   5   36.61    9.14
   7   6   5   63.34    9.73
   7   7   5    9.34    7.93
   7   7  -5    7.94    8.04
  -7   7  -5   12.08    8.55
  -7   7  -5    6.39    8.17
   7   7  -5    4.30    8.28
   7   7  -5    6.48    8.47
   7  -7   5   13.13    9.67
  -7   7   5    8.66    7.95
  -7  -7   5    6.90    9.51
  -7  -7  -5    5.99    7.52
  -7  -7  -5    6.27    8.28
   7  -7  -5    0.31    8.54
   7   8   5  383.15   22.55
   7   8  -5  419.95   22.78
  -7  -8  -5  397.15   21.14
   7   8  -5  380.25   21.78
   7  -8  -5  398.58   22.05
  -7   8   5  424.07   22.59
  -7  -8   5  403.36   24.77
  -7   8  -5  383.89   22.03
  -7   8  -5  412.93   23.19
   7  -8   5  448.34   24.21
  -7  -8  -5  388.37   23.40
   7   9  -5    3.44   11.40
  -7   9   5    3.73   11.35
  -7   9  -5    2.32   12.38
   7   9  -5    4.61   12.20
   7  -9   5    3.40   13.40
   7   9   5    6.61   12.03
  -7  -9  -5   -1.95   12.67
  -7   9  -5    1.44   11.48
   7   0  -6   54.08    5.16
   7   0  -6   64.49    6.88
  -7   0  -6   56.89    5.57
  -7   0  -6   55.95    5.16
  -7   0  -6   43.10    6.43
  -7   0  -6   56.51    6.44
  -7   0   6   55.71    5.13
   7   0   6   50.92    7.00
  -7   0   6   39.56    6.69
   7  -1  -6  737.81   21.89
  -7  -1  -6  743.92   21.71
  -7   1  -6  682.07   22.58
  -7  -1   6  652.80   24.01
  -7   1  -6  688.76   20.03
  -7   1  -6  729.18   22.52
   7  -1  -6  721.63   23.64
   7   1  -6  703.55   22.81
  -7  -1   6  702.47   18.97
  -7  -1  -6  689.28   19.33
   7  -1  -6  687.51   19.32
   7   1  -6  704.18   20.79
   7   1   6  684.68   23.08
   7   1  -6  684.91   23.36
  -7   1   6  702.12   20.94
  -7  -1  -6  668.98   21.11
   7  -1   6  731.12   23.57
  -7   1   6  702.49   23.78
  -7   1  -6  696.43   20.78
  -7  -1  -6  664.58   22.68
   7   2   6   33.28    6.41
   7  -2   6   39.45    4.36
  -7   2  -6   43.42    6.81
   7   2  -6   40.12    6.49
   7   2  -6   37.56    6.62
  -7   2  -6   28.25    5.24
   7  -2  -6   44.92    4.10
   7  -2  -6   37.47    6.54
  -7  -2  -6   30.68    6.11
  -7  -2   6   54.54    8.30
  -7   2   6   43.97    6.97
   7  -2   6   36.64    6.76
  -7  -2  -6   46.85    5.38
  -7  -2  -6   32.55    5.48
   7   2  -6   43.74    6.00
   7  -2  -6   48.80    5.59
  -7   2  -6   37.45    6.06
  -7   2   6   43.85    6.00
   7   3   6  392.16   12.17
   7  -3  -6  390.82   16.21
   7  -3   6  372.68   16.75
  -7   3  -6  396.97   15.33
  -7   3   6  380.18   15.67
   7  -3  -6  378.28   13.29
  -7   3  -6  363.15   15.34
   7   3   6  404.53   16.60
   7   3  -6  385.36   16.60
  -7  -3  -6  372.67   13.26
   7  -3  -6  377.25   16.86
  -7  -3  -6  404.56   16.05
  -7  -3  -6  361.75   16.05
   7   3  -6  387.15   15.32
   7   3  -6  377.37   16.42
  -7  -3   6  384.63   18.19
  -7   3  -6  364.20   16.14
  -7   4   6  133.48   10.63
   7  -4   6  118.63   10.73
  -7   4  -6   88.59    9.32
   7   4  -6  100.28    9.69
  -7  -4   6  134.95   12.96
   7  -4  -6  118.69   10.01
  -7  -4  -6  133.19   10.90
  -7   4  -6  109.90    8.61
   7   4  -6  118.45   10.65
  -7   4  -6   97.72    9.27
  -7  -4  -6  106.33   10.05
   7  -4  -6  114.77   10.62
   7   4   6   94.36    9.48
   7   4  -6  106.88    9.68
  -7   5  -6  444.55   18.81
  -7   5  -6  436.49   19.42
   7   5  -6  421.62   18.74
   7  -5   6  375.36   20.57
   7   5  -6  443.96   19.91
   7   5   6  398.45   19.16
  -7   5   6  434.23   19.10
  -7  -5  -6  424.46   19.65
  -7  -5   6  449.74   21.61
   7  -5  -6  440.23   18.33
   7   5  -6  438.96   20.05
   7  -5  -6  479.03   20.37
  -7  -5  -6  396.34   18.46
   7   6  -6   55.84    9.92
  -7   6  -6   47.16    9.66
  -7  -6   6   74.99   12.05
   7   6  -6   44.80    9.27
  -7   6   6   46.00    9.41
   7  -6   6   60.08   10.50
  -7   6  -6   50.78   10.16
   7  -6  -6   51.58    8.50
   7   6  -6   59.95    9.60
   7  -6  -6   54.83   10.27
   7   6   6   60.89   10.12
  -7  -6  -6   63.16   10.52
  -7  -6  -6   60.21    9.65
  -7  -7   6  131.36   15.00
  -7   7  -6  160.17   15.00
  -7  -7  -6  186.68   16.62
   7   7  -6  110.35   12.97
   7   7   6  112.80   12.79
   7   7  -6  147.66   15.16
  -7  -7  -6  134.04   13.02
   7  -7   6  132.76   14.41
  -7   7  -6  149.86   13.76
   7  -7  -6  148.15   14.62
  -7   7   6  145.69   14.73
   7   7  -6  111.56   12.73
  -7  -8   6   13.13   12.05
  -7   8  -6    4.92   10.77
   7   8   6   14.55   11.18
   7  -8   6    0.56   11.33
  -7  -8  -6    5.80   10.13
  -7   8  -6   12.77   11.21
  -7  -8  -6    6.37   11.03
   7  -8  -6    5.86   11.18
   7   8  -6   18.85   12.03
   7   8  -6   10.90   10.80
  -7   8   6   15.65   10.91
   7   0  -7  507.61   18.49
  -7   0  -7  511.59   18.22
   7   0  -7  468.80   25.93
  -7   0  -7  483.80   18.70
  -7   0   7  490.68   15.94
   7   0  -7  479.86   15.81
  -7   0  -7  487.21   16.73
   7   0   7  467.78   19.01
  -7   0  -7  505.09   15.80
  -7   1  -7   22.55    5.40
   7  -1  -7   22.12    5.83
   7   1  -7   17.97    5.07
  -7  -1  -7   23.72    5.69
  -7   1   7   21.82    5.45
   7   1  -7   21.44    6.19
  -7   1   7   24.50    7.13
   7  -1  -7   19.47    9.36
  -7   1  -7   18.11    5.96
  -7  -1  -7   26.26    7.53
   7   1  -7   24.41    7.90
  -7  -1  -7   22.25    4.10
   7   1   7   17.91    6.90
  -7  -1  -7   25.84    5.87
   7  -1   7   13.32    6.06
  -7   1  -7   19.99    6.30
  -7   1  -7   17.22    4.92
  -7  -2  -7 3002.53   78.04
   7  -2  -7 2867.25   79.42
  -7   2   7 3067.85   76.22
  -7   2  -7 3069.19   75.16
   7   2  -7 2999.38   75.01
   7  -2   7 3046.00   78.37
   7  -2  -7 2956.54   76.42
  -7  -2   7 2965.51   80.39
  -7  -2  -7 3000.00   76.26
  -7   2   7 3003.79   79.67
  -7  -2  -7 2919.56   77.01
   7   2   7 2939.98   78.16
  -7   2  -7 2895.84   76.85
  -7   2  -7 3291.67   87.77
   7   2  -7 2897.54   78.19
   7  -3  -7   59.70    9.32
  -7   3  -7   54.22    7.86
   7  -3  -7   63.78    8.96
  -7  -3  -7   55.84    8.82
  -7   3  -7   61.83    7.80
  -7   3  -7   48.77    8.05
  -7  -3   7   53.35    9.38
  -7  -3  -7   57.88    8.18
  -7  -3  -7   59.41    6.66
   7   3   7   45.07    7.64
   7  -3   7   55.34    8.55
   7   3  -7   48.23    8.34
   7   3  -7   45.40    8.23
  -7   3   7   57.75    8.13
   7   3  -7   53.90    7.64
  -7   4  -7  317.00   16.79
   7   4   7  278.86   16.47
   7  -4   7  317.17   17.18
  -7   4  -7  316.60   15.28
  -7  -4   7  330.21   19.30
  -7   4   7  308.41   16.29
   7   4  -7  319.03   16.44
  -7  -4  -7  315.84   16.17
   7  -4  -7  322.70   16.49
   7   4  -7  295.82   16.53
  -7  -4  -7  303.55   16.34
   7  -4  -7  304.42   16.99
   7   4  -7  294.82   16.87
  -7   4  -7  307.30   15.34
   7   5  -7   42.76    9.48
   7  -5  -7   52.73    9.49
  -7  -5  -7   41.91    9.23
  -7  -5  -7   34.09    9.02
   7  -5  -7   37.24    9.99
   7   5   7   59.41   10.39
  -7   5  -7   56.44    9.74
  -7   5   7   57.60   10.27
  -7   5  -7   48.04    9.16
  -7  -5   7   51.84   11.40
   7   5  -7   55.48    9.57
   7   5  -7   47.69    9.89
   7  -5   7   28.28    8.99
   7   6   7 1325.33   42.81
  -7  -6  -7 1334.27   43.29
   7   6  -7 1279.48   41.64
   7   6  -7 1351.01   41.63
  -7  -6  -7 1351.90   41.90
  -7   6  -7 1386.04   41.99
   7  -6  -7 1386.23   44.36
  -7   6  -7 1341.67   43.14
   7  -6   7 1366.38   43.04
  -7  -6   7 1384.20   45.62
   7   6  -7 1355.50   43.69
   7  -6  -7 1338.34   40.61
  -7   6   7 1374.45   42.94
   7  -7   7   31.72   12.10
   7  -7  -7   21.78   11.37
  -7  -7   7   24.41   11.79
   7   7   7    5.26    9.91
  -7  -7  -7   20.24   11.05
  -7   7  -7   21.55   10.79
   7   7  -7   16.94   11.04
   7   7  -7   14.00   10.41
  -7   7   7   18.44   10.71
  -7  -7  -7   25.79   10.70
  -7   7  -7   22.86   10.51
   7   0  -8    3.07    6.17
  -7   0  -8    1.52    5.92
  -7   0  -8    3.25    6.28
   7   0   8    7.13    6.65
  -7   0   8    5.56    7.14
   7   0  -8    6.05    6.67
  -7   0   8    7.77    9.13
  -7   0  -8   11.66    6.08
  -7   1   8   33.08    8.45
   7   1  -8   43.59    8.96
  -7   1  -8   37.47    7.93
   7   1  -8   40.77    6.86
  -7  -1   8   35.50    8.69
  -7   1  -8   32.90    7.95
  -7  -1  -8   32.30    7.02
   7  -1  -8   41.03    8.63
  -7   1   8   38.69    6.65
   7  -1  -8   41.64    7.80
  -7   1  -8   29.00    6.45
   7   1   8   41.11    8.17
   7   1  -8   34.07    7.86
   7  -1   8   39.46    8.22
  -7  -1  -8   47.30    7.46
  -7  -1  -8   25.53    7.86
  -7   2  -8   -1.24    6.43
   7   2   8   -1.07    6.26
  -7  -2  -8    1.24    5.56
   7  -2   8    2.63    6.82
  -7  -2   8   -2.17    7.23
   7  -2  -8    0.75    7.50
  -7   2  -8    0.03    6.41
   7   2  -8    2.05    7.14
   7   2  -8   -1.40    5.88
  -7   2   8    2.53    6.95
  -7   2  -8   -0.67    5.71
   7   2  -8    0.06    6.98
  -7  -2  -8    2.78    6.62
  -7   2   8   -1.50    6.29
  -7  -2  -8   -0.96    6.27
   7  -2  -8   -1.77    6.21
   7  -3  -8   35.19    8.72
  -7  -3   8   26.59    9.80
   7  -3   8   26.39    8.37
  -7  -3  -8   36.35    9.19
  -7  -3  -8   32.50    8.22
   7   3  -8   35.18    8.83
   7   3  -8   40.57    9.29
  -7   3  -8   48.99    8.71
  -7   3   8   32.69    7.96
   7   3   8   28.96    8.02
  -7   3  -8   32.08    7.95
  -7   3  -8   47.77    9.14
   7   3  -8   32.94    8.08
   7  -3  -8   40.89    9.65
  -7   4  -8    1.43    7.74
   7   4  -8    5.05    8.55
   7   4  -8   11.53    8.56
  -7   4   8    1.62    7.64
  -7   4  -8   10.80    7.70
   7   4  -8    7.60    8.06
  -7  -4   8    7.03    9.36
  -7  -4  -8    2.06    8.23
   7  -4   8    2.10    8.11
  -7  -4  -8   17.08    8.80
   7  -4  -8    2.81    7.89
  -7   4  -8    5.07    8.05
   7  -4  -8    4.73    8.74
   7   4   8    3.92    8.23
   7   5   8  145.74   14.49
   7   5  -8  106.72   12.71
  -7   5   8  168.37   14.50
  -7  -5   8  162.17   16.76
  -7  -5  -8  157.86   14.42
   7  -5  -8  148.94   14.08
   7  -5   8  138.91   13.78
  -7   5  -8  125.91   13.12
   7   5  -8  136.89   13.72
   7   5  -8  148.24   13.52
   7  -5  -8  179.16   16.48
  -7  -5  -8  128.68   13.26
  -7   5  -8  134.42   12.97
  -7  -6   8    4.70   11.21
  -7   6   8   -1.08    9.96
  -7   6  -8    3.66    9.37
   7  -6   8    2.22   10.36
  -7  -6  -8    0.30    9.77
   7   6   8    1.93    9.85
   7   6  -8   -1.24    9.94
   7   6  -8    6.98   10.24
   7  -6  -8    4.48   10.36
   7  -6  -8   -2.14    9.50
  -7  -6  -8    2.17   10.39
  -7   6  -8    2.01    9.68
   7   6  -8    3.02    9.71
   7   7  -8   84.12   15.51
  -7  -7   8   91.41   16.44
  -7  -7  -8   83.45   13.95
  -7   7   8  102.48   15.17
   7  -7  -8   81.60   14.97
  -7   7  -8  105.20   15.00
  -7   7  -8   87.51   23.19
   7   7   8   58.76   13.44
  -7   0   9   38.74   10.03
   7   0  -9   29.77    8.62
  -7   0  -9   37.30    8.45
   7   0  -9   45.94    9.14
  -7   0  -9   39.97    9.39
   7   0   9   50.70    9.87
  -7   1  -9   17.01    8.56
   7   1  -9   11.55    8.71
  -7   1   9    9.82    8.47
   7  -1   9    8.26    7.94
  -7  -1   9   15.26    9.21
   7  -1  -9    9.84    7.76
  -7  -1  -9   13.10    8.11
  -7   1  -9   11.74    7.89
   7   1  -9    7.76    8.10
   7   1   9   11.73    8.41
  -7  -1  -9    6.56    8.26
   7  -1  -9   22.06    9.09
  -7  -2  -9  600.58   24.16
  -7   2   9  632.57   23.51
  -7   2  -9  607.20   24.63
   7  -2   9  631.07   25.32
   7   2  -9  620.31   25.43
   7   2   9  620.67   25.69
  -7  -2   9  633.36   27.51
   7   2  -9  612.51   25.57
  -7  -2  -9  659.70   25.53
  -7   2   9  585.04   25.61
   7  -2  -9  594.92   26.09
  -7   2  -9  548.86   24.50
   7   3   9   31.03    9.84
   7  -3  -9   45.88   11.10
  -7  -3  -9   27.31    9.41
  -7  -3   9   25.82   10.80
   7  -3   9   25.66    9.65
  -7  -3  -9   30.26    9.74
  -7   3  -9   24.20    8.55
   7   3  -9   27.05    9.79
  -7   3  -9   41.38    9.99
  -7   3  -9   28.01    9.40
   7   3  -9   32.76    9.09
  -7   3   9   31.69    9.39
   7  -3  -9   39.69   10.90
   7   3  -9   35.23   10.11
  -7  -4   9   18.05   11.06
   7  -4  -9   17.03   11.01
  -7   4   9   10.78    9.71
  -7   4  -9   18.44    9.42
  -7  -4  -9   17.47   10.32
   7   4   9   18.82   10.62
  -7   4  -9   26.90   10.16
   7  -4  -9   22.68   10.52
   7   4  -9   10.46    9.58
  -7  -4  -9   28.09   10.50
   7   4  -9   29.12    9.91
  -7   4  -9   30.62   10.23
   7  -4   9   25.82   10.32
   7   4  -9   27.86   10.68
  -7  -5   9   31.69   12.87
  -7   5   9   27.99   11.57
  -7   5  -9   28.97   10.77
   7  -5  -9   25.21   11.68
  -7  -5  -9   26.93   11.63
  -7  -5  -9   21.59   10.75
  -7   5  -9   24.97   10.44
   7  -5  -9   19.64   12.33
   7   5  -9   34.95   11.79
   7  -5   9   18.68   10.98
   7   5  -9   27.81   11.02
   7   5   9   25.64   11.21
   7   5  -9   30.41   11.71
   7   0  10   67.94   11.74
  -7   0 -10   52.85   10.36
  -7   0 -10   54.90   11.10
  -7   0  10   69.69   13.22
   7   0 -10   61.43   11.66
   7   0 -10   39.86   10.60
   7  -1 -10  323.81   20.66
  -7  -1 -10  302.38   19.91
   7   1 -10  275.54   18.83
   7   1 -10  299.67   20.75
   7  -1  10  322.10   20.02
   7   1  10  312.28   20.45
  -7   1 -10  326.58   19.39
  -7   1 -10  290.47   19.84
  -7  -1  10  295.26   22.11
  -7   1  10  326.28   21.13
   7   2 -10   31.43   10.72
  -7   2 -10   27.93   10.82
   7  -2 -10   24.15   12.49
  -7  -2 -10   30.38   10.90
   7  -2 -10   42.16   12.23
   7   2  10   31.91   10.85
   7   2 -10   27.32   11.28
  -7   2 -10   38.90   11.07
   7  -2  10   33.81   10.73
  -7  -2  10   31.38   11.91
   7   3 -10   61.21   13.06
   7  -3 -10   62.23   13.53
   7  -3  10   62.31   12.27
  -7  -3 -10   47.14   11.63
   7  -3 -10   71.73   13.83
   7   3 -10   54.41   11.99
  -7  -3 -10   43.31   11.86
   7   3  10   64.78   13.17
  -7   3 -10   50.60   11.91
  -7  -3  10   85.91   14.79
  -7   3  10   60.01   12.22
  -7   3 -10   53.89   11.88
  -7  -4 -10   95.41   14.81
  -7   4 -10   89.80   13.82
   7  -4 -10   94.31   15.15
   7  -4  10  100.03   14.30
   7  -4 -10   83.63   15.12
  -7   4  10   75.94   13.76
   7   4 -10  105.66   15.38
  -7  -4  10   91.82   15.66
  -7   4 -10   96.02   23.46
  -7  -4 -10  115.26   15.05
   7   4  10   85.46   14.65
  -7   0 -11    8.92   11.40
   7   0 -11   27.18   12.83
  -7   0  11   12.71   21.96
   7   0  11    9.51   11.16
   7   1 -11   28.37   13.00
   7   1 -11   40.45   12.40
   7  -1  11   26.77   12.23
  -7   1  11   49.79   14.04
  -7  -1 -11   21.04   12.33
  -7  -1  11   28.17   17.65
   7   1  11   37.01   12.12
  -7   1 -11   24.30   11.70
   7  -1 -11   22.63   13.30
  -8   0   0  222.35    8.38
   8   0   0  190.18    7.91
  -8   0   0  186.21    9.26
  -8   0   0  222.18    7.99
   8   0   0  191.36    7.73
  -8   0   0  195.81    7.23
  -8   0   0  206.08    8.20
   8   0   0  199.47    8.30
   8   0   0  197.34    7.66
   8   0   0  204.02    8.06
  -8  -1   0 1746.98   42.75
   8   1   0 1674.38   41.57
   8   1   0 1708.61   41.37
   8  -1   0 1587.69   42.58
  -8  -1   0 1647.15   42.29
   8   1   0 1549.58   43.28
  -8   1   0 1738.25   41.25
   8  -1   0 1652.13   41.70
   8   1   0 1541.08   42.96
   8   1   0 1649.12   41.02
   8  -1   0 1659.11   41.39
  -8   1   0 1682.37   41.10
  -8   1   0 1686.46   41.93
   8  -1   0 1594.32   41.12
   8  -1   0 1539.63   42.25
  -8   1   0 1654.10   42.53
  -8  -1   0 1718.43   42.51
   8   1   0 1644.84   42.51
   8  -1   0 1681.61   43.01
   8  -2   0 3261.58   81.02
   8   2   0 3273.86   81.00
  -8  -2   0 3311.30   82.67
  -8   2   0 3348.89   81.32
   8   2   0 3195.98   83.49
  -8  -2   0 3372.23   80.96
   8  -2   0 3320.64   81.52
  -8   2   0 3398.83   83.12
  -8  -2   0 3319.91   83.60
   8   2   0 3357.15   80.76
   8  -2   0 3409.61   81.48
  -8  -2   0 3503.56   83.05
  -8   2   0 3367.77   80.75
  -8   2   0 3365.54   82.84
   8   3   0  325.84   11.36
  -8   3   0  322.45   11.08
   8   3   0  312.38   10.15
   8  -3   0  311.44    9.75
  -8   3   0  314.87   11.06
  -8  -3   0  336.48   12.10
   8   3   0  325.47   11.50
  -8   3   0  317.89   12.55
  -8  -3   0  294.35   10.37
  -8   3   0  301.38    9.89
   8  -3   0  301.48   10.08
  -8  -3   0  325.56   12.62
  -8   4   0   64.37    5.82
  -8   4   0   51.45    6.08
   8  -4   0   81.75    6.32
   8   4   0   70.06    5.89
  -8   4   0   74.77    4.19
   8   4   0   85.61    6.65
  -8   4   0   81.73    5.98
  -8  -4   0   76.84    7.45
   8  -4   0   64.75    4.18
  -8  -4   0   66.37    5.61
  -8  -4   0   76.11    6.72
  -8   5   0 1933.98   53.80
   8   5   0 2020.03   52.07
   8  -5   0 1982.74   52.14
   8   5   0 1942.39   50.85
  -8  -5   0 2026.58   55.09
  -8   5   0 2059.27   51.85
   8   5   0 2007.29   52.53
  -8   5   0 2051.83   52.29
  -8  -5   0 2029.45   52.66
  -8  -6   0 1395.43   39.43
   8  -6   0 1499.62   40.00
  -8   6   0 1398.33   38.88
  -8  -6   0 1467.00   42.79
   8   6   0 1435.68   39.58
  -8   6   0 1355.50   41.43
   8   6   0 1420.13   38.41
  -8   6   0 1424.87   39.35
   8   6   0 1449.02   39.35
  -8   7   0   -0.66    5.72
  -8   7   0   -0.62    5.35
   8   7   0   -1.90    5.77
  -8  -7   0   -0.15    6.86
   8  -7   0    5.03    6.16
   8   7   0    2.12    5.70
   8   7   0    2.36    5.89
  -8   7   0    0.05    7.55
  -8  -7   0    3.69    5.79
  -8   8   0   26.78    9.98
   8   8   0   25.65    8.23
   8   8   0   20.81    7.83
  -8   8   0   23.66    8.04
   8   8   0   30.55    8.06
  -8  -8   0   19.73    9.42
  -8   9   0  573.54   24.75
  -8   9   0  604.71   28.75
  -8  -9   0  601.62   28.99
   8   9   0  546.36   24.47
   8  -9   0  599.31   26.06
   8  10   0  152.24   16.08
  -8  10   0  196.25   23.27
  -8  10   0  174.31   15.96
  -8 -10   0  247.26   21.67
  -8   0  -1   27.49    3.38
  -8   0  -1   26.48    3.91
  -8   0  -1   26.97    2.63
  -8   0   1   34.46    3.63
   8   0  -1   30.88    3.51
   8   0  -1   31.06    3.35
   8   0   1   26.25    3.69
   8   0   1   31.25    3.76
   8   0   1   26.84    3.59
   8   0  -1   28.79    4.25
   8   0  -1   24.77    3.32
  -8   0   1   31.33    3.17
   8   0  -1   36.40    4.30
   8   0  -1   40.64    3.97
  -8   0  -1   48.18    5.09
   8   0   1   30.76    3.51
   8   0   1   32.98    3.02
  -8   0   1   21.61    2.87
  -8   0  -1   28.30    3.01
   8  -1   1  341.45   11.47
  -8   1   1  390.41   11.57
   8   1  -1  375.83   10.70
  -8  -1  -1  352.68   11.01
   8   1   1  378.40   11.83
  -8   1  -1  349.98   11.51
   8   1   1  363.92   11.43
  -8  -1  -1  373.77   12.09
  -8  -1   1  364.38   11.62
  -8  -1  -1  369.47   11.62
   8  -1  -1  365.39   11.47
  -8  -1  -1  379.92   11.60
  -8   1  -1  359.17    9.63
  -8   1   1  365.76   11.70
  -8   1  -1  369.35   11.87
   8  -1  -1  366.48   12.23
   8   1  -1  349.58   11.58
  -8   1  -1  363.43   11.38
  -8  -1  -1  396.72   12.28
  -8  -1   1  372.90   12.41
   8   1   1  354.71   11.42
  -8   1  -1  353.55   13.67
   8  -1  -1  360.30   11.94
  -8  -1   1  374.30   12.46
   8  -1   1  351.97    9.93
   8   1   1  345.00   11.83
   8  -1  -1  354.74   11.75
  -8   1   1  381.44   11.90
   8   1  -1  345.02   13.22
   8  -1   1  366.87   12.97
  -8   1   1  336.81   11.82
  -8  -1   1  350.42   11.10
  -8  -2  -1 2036.07   53.86
   8  -2   1 2039.68   49.81
  -8   2  -1 2077.58   52.50
  -8   2   1 1992.33   52.05
   8  -2  -1 2045.54   51.04
  -8   2   1 2147.97   51.33
  -8  -2  -1 2029.92   51.24
   8  -2   1 1990.19   49.88
  -8   2  -1 2078.70   51.01
   8   2  -1 2024.03   49.66
  -8   2   1 2058.63   51.50
   8   2  -1 2115.58   52.91
   8  -2  -1 2065.37   51.73
  -8  -2  -1 2054.13   52.23
  -8  -2  -1 2089.05   51.94
  -8  -2   1 2174.82   53.52
   8   2   1 2096.39   51.27
   8   2   1 1949.22   52.23
  -8  -2   1 1969.54   49.89
  -8   2   1 2053.72   50.50
   8   2   1 2035.74   52.14
   8  -2   1 1983.55   50.51
   8   2   1 2129.67   51.10
   8  -2   1 2038.98   53.48
  -8  -2   1 2110.77   52.45
   8  -2  -1 1950.70   51.84
   8   2  -1 2047.40   51.20
  -8   2  -1 2074.34   50.93
  -8   2   1 2031.26   52.70
   8   3   1  105.37    6.33
   8  -3  -1  117.55    6.34
   8   3   1  115.23    6.29
   8  -3  -1  122.51    6.89
   8  -3   1  121.11    5.16
   8  -3   1  117.78    5.33
  -8  -3   1  127.39    8.45
   8  -3  -1  114.33    7.18
  -8  -3  -1  113.07    7.24
   8   3  -1  121.73    7.01
  -8  -3  -1  126.08    7.86
  -8   3   1  124.25    7.99
  -8  -3   1  107.57    7.09
  -8   3  -1  126.92    6.96
  -8   3   1  122.01    5.88
  -8   3   1  120.65    6.29
   8   3  -1  121.27    5.05
  -8   3   1  109.72    6.09
  -8  -3  -1  118.20    5.94
  -8  -3   1  118.38    5.38
   8  -3   1  112.22    8.28
  -8   3  -1  118.16    5.78
   8  -3   1  110.68    5.36
  -8   3  -1  130.69    7.00
   8   3  -1  135.53    7.21
  -8   4  -1    9.02    2.41
   8   4  -1    6.96    3.69
   8   4  -1    7.63    2.65
  -8   4   1    5.81    3.20
   8  -4  -1    9.04    3.73
  -8  -4   1    7.09    3.16
   8  -4  -1    7.95    2.67
  -8   4  -1   10.58    3.71
   8  -4   1    9.17    2.10
  -8   4   1    9.22    4.23
  -8   4  -1    2.49    3.31
  -8  -4   1    4.85    4.61
   8  -4  -1    6.45    2.93
   8   4   1    7.73    3.48
   8   4   1   12.02    3.57
   8  -4   1    9.69    3.00
  -8  -4   1    7.06    3.82
  -8  -4  -1   13.86    4.12
  -8  -4  -1    7.97    4.81
  -8   4   1   28.18    4.25
   8   4  -1   11.28    3.93
  -8   4  -1   11.27    5.22
   8   4   1    5.50    3.45
  -8  -5   1  419.77   15.17
  -8  -5  -1  433.84   17.26
  -8   5   1  400.67   16.62
  -8   5  -1  398.88   17.01
  -8   5  -1  437.88   15.26
   8   5   1  425.34   15.20
  -8   5  -1  399.73   15.28
   8   5   1  428.11   14.46
   8  -5  -1  397.83   11.58
  -8  -5   1  406.98   17.31
   8   5  -1  418.99   15.32
   8  -5   1  418.04   14.36
  -8  -5  -1  435.58   15.64
   8   5  -1  430.37   15.70
   8  -5  -1  408.78   15.22
   8   5   1  412.32   14.68
  -8   5   1  386.29   13.82
  -8   5   1  434.99   14.88
   8   5  -1  395.79   13.68
   8   6  -1  930.36   28.56
   8  -6   1  948.41   28.26
  -8  -6  -1  961.31   28.70
  -8   6   1  928.94   30.78
  -8   6  -1  947.13   28.42
  -8   6  -1  932.23   30.60
  -8   6  -1  936.31   28.67
   8   6   1  933.02   28.09
   8   6   1  944.98   27.55
  -8   6   1  927.21   26.89
  -8  -6  -1  951.83   31.28
   8   6  -1  950.15   29.00
   8  -6  -1  985.18   29.09
   8   6   1  908.87   27.68
  -8   6   1  982.11   28.10
   8   6  -1  941.75   26.65
  -8  -6   1  981.57   32.51
  -8  -6   1  944.33   28.13
   8   7  -1   16.33    6.17
  -8  -7  -1   24.08    6.73
  -8   7   1    8.85    5.93
   8  -7  -1   11.21    6.69
  -8   7  -1   15.36    8.50
   8   7   1   15.51    5.98
  -8   7   1   11.00    7.47
   8   7   1   16.34    6.88
  -8  -7  -1   18.35    8.96
   8   7  -1   13.34    6.29
   8  -7   1   12.83    6.68
   8   7  -1   24.73    7.20
   8   7   1   12.98    6.57
  -8  -7   1    9.67    7.67
  -8   7   1   16.54    5.65
  -8   7  -1   12.75    6.59
  -8  -7   1   14.35    5.99
  -8   7  -1   17.71    6.57
  -8  -8  -1    8.40    9.33
   8   8   1    5.33    8.96
  -8  -8  -1    7.14    7.03
  -8   8  -1    8.66   10.15
  -8   8  -1    9.16    7.44
   8  -8   1    3.02    8.20
  -8   8   1    4.33    7.15
  -8   8   1    8.65    9.66
   8   8  -1    2.40    7.67
  -8   8  -1   19.05    8.50
   8   8  -1    1.59    9.23
   8   8   1    8.84    7.23
   8  -8  -1    2.37    7.80
  -8  -8   1    4.51    9.14
  -8  -9   1   73.22   13.63
  -8   9   1   77.11   13.70
   8   9   1   69.29   11.28
   8   9  -1   68.40   11.29
  -8   9   1   77.52   11.17
   8  -9  -1   76.37   12.53
  -8   9  -1   98.75   15.23
  -8  -9  -1   96.77   15.04
  -8   9  -1   79.39   11.90
   8   9   1   88.02   12.00
  -8   0   2  772.46   21.01
  -8   0  -2  770.85   22.01
   8   0  -2  803.74   21.66
  -8   0   2  801.98   21.92
  -8   0   2  818.86   22.61
   8   0  -2  786.36   20.90
   8   0   2  792.56   20.17
  -8   0  -2  817.90   22.29
  -8   0  -2  810.45   21.38
  -8   0   2  771.18   22.57
   8   0   2  781.07   22.77
  -8   0  -2  789.70   20.36
   8   0  -2  794.24   21.22
   8   0  -2  787.27   23.12
  -8   1   2    8.35    2.44
  -8   1  -2    7.31    2.65
   8  -1  -2   11.81    2.98
   8   1   2    8.58    3.02
   8  -1  -2   14.26    3.37
   8   1  -2    9.17    1.96
   8   1  -2    6.95    3.03
  -8   1  -2    9.27    2.91
  -8  -1  -2    9.25    2.28
  -8  -1   2    7.99    3.28
  -8   1   2   17.58    3.10
  -8  -1  -2   14.50    2.84
  -8   1  -2   11.54    2.76
   8   1   2    9.88    2.61
  -8  -1   2    7.63    3.01
  -8  -1  -2    6.85    2.78
   8  -1   2    9.36    3.17
   8  -1  -2   10.73    3.91
   8   1   2    8.98    2.96
   8  -1   2    6.58    3.31
   8   1  -2   10.27    1.97
   8  -1  -2    5.93    2.85
  -8   1   2   12.65    3.06
   8   1  -2   10.23    2.86
  -8   1   2    9.63    2.93
   8  -1  -2    7.69    5.88
  -8  -1  -2    7.15    2.49
  -8  -2  -2  469.34   14.18
  -8  -2   2  484.98   15.34
  -8   2   2  466.39   14.76
  -8  -2   2  482.70   16.28
  -8   2   2  464.71   14.95
  -8  -2  -2  475.76   16.01
   8   2   2  470.63   14.25
   8  -2   2  460.34   13.86
   8   2   2  453.31   14.52
   8   2  -2  478.04   15.39
   8   2   2  443.08   14.76
  -8   2   2  484.31   13.81
  -8   2  -2  460.24   13.85
  -8   2  -2  480.96   15.16
   8   2  -2  458.38   11.73
  -8   2   2  485.60   15.32
   8   2  -2  434.05   11.98
   8  -2  -2  454.47   14.10
   8  -2  -2  468.88   14.34
   8  -2  -2  473.29   14.60
  -8   2  -2  466.60   14.60
   8   2   2  479.33   14.93
   8   2  -2  471.05   14.74
   8  -2   2  483.54   16.57
  -8  -2  -2  460.03   15.12
   8  -3   2   16.50    2.18
  -8   3   2   21.27    3.29
   8   3  -2    7.08    3.51
   8  -3  -2   19.07    3.80
  -8   3   2   15.01    4.01
   8  -3  -2   11.32    3.55
   8  -3   2    9.71    4.37
  -8  -3  -2   15.54    4.29
   8   3  -2   12.45    3.68
   8   3   2   16.49    3.81
  -8   3  -2   14.57    2.95
   8   3   2   16.35    3.47
   8  -3   2   15.34    2.36
   8  -3  -2   12.98    3.41
   8  -3   2   13.47    2.88
  -8  -3  -2   15.42    2.87
   8   3   2   14.52    4.29
   8   3  -2   13.14    1.70
  -8   3  -2   16.31    4.00
  -8  -3   2   22.22    5.04
   8  -3  -2   14.42    3.78
  -8  -3  -2   10.54    3.85
  -8  -3   2   12.79    3.75
  -8   3  -2   12.73    3.61
   8  -4  -2  360.23   13.56
  -8  -4  -2  379.17   14.85
   8   4  -2  378.30   14.02
  -8   4  -2  360.83   11.74
   8  -4   2  339.19   10.57
   8  -4   2  384.14   15.84
  -8   4   2  364.34   12.01
   8  -4  -2  362.83   12.24
  -8  -4   2  365.62   15.29
  -8  -4   2  354.18   10.57
  -8  -4   2  371.02   13.62
   8  -4  -2  349.51   12.60
   8   4   2  369.96   12.93
  -8   4  -2  399.05   14.07
  -8   4   2  378.12   14.61
   8  -4  -2  361.14   11.96
  -8   4  -2  376.46   13.94
  -8   4   2  359.13   12.32
   8  -4   2  378.32   11.91
   8   4  -2  350.39   10.48
   8   4   2  398.98   12.97
  -8   4  -2  357.74   11.01
  -8  -4  -2  361.28   13.82
   8   4   2  362.72   13.53
   8   4  -2  382.62   13.96
  -8   5   2   69.73    5.37
  -8  -5  -2   72.93    8.60
   8  -5  -2   53.14    4.59
  -8  -5  -2   53.29    6.59
   8   5  -2   72.12    7.34
  -8   5  -2   76.90    7.32
  -8  -5   2   68.49    6.90
  -8   5  -2   79.99    7.73
  -8   5   2   60.32    5.98
   8  -5   2   72.93    9.07
   8   5   2   64.35    5.86
  -8   5   2   57.98    7.36
   8   5  -2   62.29    4.92
  -8  -5   2   58.37    8.24
   8  -5  -2   59.86    6.70
   8   5  -2   54.67    7.06
   8   5   2   59.45    6.44
   8   5   2   61.93    6.69
  -8   6   2   89.57    7.89
   8  -6   2   92.93   10.32
   8  -6  -2  104.76    9.53
  -8  -6   2   83.22   10.39
   8   6   2  118.45    8.99
   8   6   2   97.86    8.68
   8  -6   2   94.62    8.17
  -8  -6   2  115.01    8.84
  -8   6   2  100.83   10.59
   8   6  -2   77.84    8.24
   8   6   2  102.39    7.27
  -8  -6  -2  108.25    9.18
  -8   6  -2  114.03    9.43
  -8   6   2  101.55    6.82
  -8  -7  -2  100.27   12.28
   8   7  -2   85.14   10.19
  -8  -7  -2   87.41    9.37
  -8   7  -2   66.27    9.19
  -8  -7   2  106.71    8.96
   8  -7   2   73.25    9.33
  -8  -7   2   87.93   11.42
   8   7  -2   97.72   10.55
  -8   7   2   74.25    8.24
  -8   7  -2   88.66    9.58
   8   7   2   80.55    8.85
   8  -7   2   77.63   11.09
   8   7   2   86.48    9.39
  -8   7   2   80.52   10.30
  -8   8  -2   45.70    9.57
  -8   8  -2   66.94   10.39
   8  -8   2   76.58   12.38
  -8  -8  -2   63.37   11.76
   8   8   2   68.67   10.17
   8   8   2   56.94    9.04
  -8  -8  -2   66.67    9.88
  -8  -8   2   54.45   11.11
   8   8  -2   64.87    9.92
   8   8  -2   55.46    9.78
  -8   8   2   50.19   10.76
   8  -8  -2   64.02   10.40
  -8   8   2   64.60    9.02
  -8   9   2   60.16   10.64
   8  -9   2   49.18   13.55
  -8  -9  -2   56.38   13.57
   8   9   2   45.63   11.54
   8   9   2   41.83   10.82
  -8  -9   2   78.04   13.91
  -8   9  -2   46.98   12.52
   8  -9  -2   54.33   11.50
  -8   9  -2   69.69   12.40
   8   9  -2   54.27   11.23
  -8   9   2   39.62   11.71
   8   9  -2   63.21   11.69
  -8   0  -3 1534.30   37.74
  -8   0  -3 1522.30   39.70
   8   0  -3 1538.12   38.57
  -8   0  -3 1569.07   38.47
  -8   0   3 1512.11   37.98
  -8   0  -3 1560.70   40.10
  -8   0   3 1483.05   39.83
  -8   0   3 1527.81   40.87
   8   0   3 1525.78   40.52
  -8   0  -3 1464.29   37.46
   8   0  -3 1489.30   37.74
   8   0  -3 1526.77   40.22
   8   1  -3  180.18    7.84
   8  -1   3  158.43    8.99
  -8  -1  -3  176.08    7.59
  -8   1   3  170.86    8.10
   8  -1  -3  172.61    7.24
   8   1   3  176.57    8.17
  -8  -1  -3  180.12    7.08
  -8  -1   3  181.26    8.23
   8   1   3  176.43    8.55
  -8  -1  -3  184.92    8.52
   8  -1  -3  171.15    7.41
   8  -1  -3  177.50    7.77
  -8   1   3  181.05    7.48
  -8   1  -3  192.07    8.16
   8   1  -3  172.14    8.33
   8  -1  -3  178.65    7.91
  -8   1  -3  169.98    7.52
   8   1  -3  164.17    5.42
  -8  -1  -3  182.94    7.28
  -8   1   3  186.21    8.70
  -8  -1   3  171.04    9.21
   8   1  -3  160.64    5.86
   8   1   3  170.12    7.10
  -8   1  -3  174.33    8.18
  -8  -2  -3 5043.71  120.00
  -8   2   3 4953.62  120.66
  -8   2  -3 4963.19  117.33
   8   2   3 4958.42  116.63
  -8   2   3 4894.95  119.47
  -8   2  -3 4811.23  117.97
   8   2  -3 4811.98  121.26
   8   2  -3 4925.13  117.40
   8   2   3 4930.73  119.19
   8  -2  -3 4778.97  119.62
   8  -2   3 4732.64  120.49
   8   2   3 4571.93  120.12
  -8   2   3 5051.13  118.66
  -8   2  -3 4956.93  121.22
  -8  -2   3 4951.93  122.03
  -8  -2   3 5051.23  119.54
   8  -2  -3 4732.04  115.91
   8  -2   3 4651.28  117.76
  -8  -2  -3 4923.13  119.70
  -8  -2  -3 4972.66  119.62
   8   3  -3   50.29    5.90
  -8   3  -3   40.62    4.21
  -8  -3  -3   39.30    4.06
  -8  -3   3   36.91    5.90
   8  -3  -3   47.69    8.00
   8  -3  -3   34.18    4.47
  -8   3   3   50.99    5.86
  -8   3  -3   43.17    5.44
   8   3  -3   42.55    5.27
   8  -3  -3   43.79    5.65
   8  -3   3   26.89    5.86
  -8  -3  -3   46.70    5.47
  -8  -3  -3   32.69    4.98
  -8   3   3   43.15    4.09
   8  -3  -3   42.65    4.88
  -8   3  -3   35.35    4.90
   8  -3   3   35.37    4.26
   8   3   3   47.26    4.67
   8   3   3   38.15    5.18
  -8  -3   3   54.02    5.85
   8  -4  -3  399.37   14.89
[truncated: 385,674 more chars]
