# Supplementary material for: How the Position of Substitution Affects Intermolecular Bonding in Halogen Derivatives of Carboranes: Crystal Structures of 1,2,3- and 8,9,12-Triiodo- and 8,9,12-Tribromo ortho-Carboranes
Source: Molecules. 2023 Jan 15;28(2):875. doi: 10.3390/molecules28020875 (PMC9865681; doi:10.3390/molecules28020875)
Supplement: Supplementary file 1 [file molecules-28-00875-s001.zip › siv75.cif]

 
data_siv75
 
_audit_creation_method            SHELXL-2014/6
_chemical_name_systematic         ?
_chemical_name_common             ?
_chemical_melting_point           ?
_chemical_formula_moiety          
 'C2 H9 B10 Br3' 
_chemical_formula_sum
 'C2 H9 B10 Br3' 
_chemical_formula_weight          380.92

loop_
 _atom_type_symbol
 _atom_type_description
 _atom_type_scat_dispersion_real
 _atom_type_scat_dispersion_imag
 _atom_type_scat_source
 'C'  'C'   0.0033   0.0016
 'International Tables Vol C Tables 4.2.6.8 and 6.1.1.4'
 'H'  'H'   0.0000   0.0000
 'International Tables Vol C Tables 4.2.6.8 and 6.1.1.4'
 'B'  'B'   0.0013   0.0007
 'International Tables Vol C Tables 4.2.6.8 and 6.1.1.4'
 'Br'  'Br'  -0.2901   2.4595
 'International Tables Vol C Tables 4.2.6.8 and 6.1.1.4'
 
_space_group_crystal_system       monoclinic
_space_group_IT_number            15
_space_group_name_H-M_alt         'C 2/c'
_space_group_name_Hall            '-C 2yc'
 
_shelx_space_group_comment
;
The symmetry employed for this shelxl refinement is uniquely defined
by the following loop, which should always be used as a source of
symmetry information in preference to the above space-group names.
They are only intended as comments.
;
 
loop_
 _space_group_symop_operation_xyz
 'x, y, z'
 '-x, y, -z+1/2'
 'x+1/2, y+1/2, z'
 '-x+1/2, y+1/2, -z+1/2'
 '-x, -y, -z'
 'x, -y, z-1/2'
 '-x+1/2, -y+1/2, -z'
 'x+1/2, -y+1/2, z-1/2'
 
_cell_length_a                    12.1453(6)
_cell_length_b                    8.4794(5)
_cell_length_c                    23.0632(11)
_cell_angle_alpha                 90
_cell_angle_beta                  90.089(2)
_cell_angle_gamma                 90
_cell_volume                      2375.2(2)
_cell_formula_units_Z             8
_cell_measurement_temperature     120(2)
_cell_measurement_reflns_used     3362
_cell_measurement_theta_min       2.93
_cell_measurement_theta_max       25.94
 
_exptl_crystal_description        prizm
_exptl_crystal_colour             colorless
_exptl_crystal_density_meas       ?
_exptl_crystal_density_method     ?
_exptl_crystal_density_diffrn     2.131          
_exptl_crystal_F_000              1408
_exptl_transmission_factor_min    ?
_exptl_transmission_factor_max    ?
_exptl_crystal_size_max           0.14
_exptl_crystal_size_mid           0.10
_exptl_crystal_size_min           0.08
_exptl_absorpt_coefficient_mu     10.136
_shelx_estimated_absorpt_T_min    ?
_shelx_estimated_absorpt_T_max    ?
_exptl_absorpt_correction_type    'multi-scan'
_exptl_absorpt_correction_T_min   0.276
_exptl_absorpt_correction_T_max   0.444
_exptl_absorpt_process_details    'SADABS-2014/5 (Bruker,2014/5)' 
_exptl_absorpt_special_details    ?
_diffrn_ambient_temperature       120(2)
_diffrn_radiation_wavelength      0.71073
_diffrn_radiation_type            MoK\a
_diffrn_source                    'sealed tube'
_diffrn_measurement_device_type   'Bruker APEX-II CCD' 
_diffrn_measurement_method        '\f and \w scans' 
_diffrn_detector_area_resol_mean  ?
_diffrn_reflns_number             10373
_diffrn_reflns_av_unetI/netI      0.0449
_diffrn_reflns_av_R_equivalents   0.0547
_diffrn_reflns_limit_h_min        -14
_diffrn_reflns_limit_h_max        14
_diffrn_reflns_limit_k_min        -10
_diffrn_reflns_limit_k_max        10
_diffrn_reflns_limit_l_min        -27
_diffrn_reflns_limit_l_max        28
_diffrn_reflns_theta_min          2.930
_diffrn_reflns_theta_max          26.026
_diffrn_reflns_theta_full         25.242
_diffrn_measured_fraction_theta_max   1.000
_diffrn_measured_fraction_theta_full  1.000
_diffrn_reflns_Laue_measured_fraction_max    1.000
_diffrn_reflns_Laue_measured_fraction_full   1.000
_diffrn_reflns_point_group_measured_fraction_max   1.000
_diffrn_reflns_point_group_measured_fraction_full  1.000
_reflns_number_total              2349
_reflns_number_gt                 1908
_reflns_threshold_expression      'I > 2\s(I)'
_reflns_Friedel_coverage          0.000
_reflns_Friedel_fraction_max      .
_reflns_Friedel_fraction_full     .
 
_reflns_special_details
;
 Reflections were merged by SHELXL according to the crystal
 class for the calculation of statistics and refinement.
 
 _reflns_Friedel_fraction is defined as the number of unique
 Friedel pairs measured divided by the number that would be
 possible theoretically, ignoring centric projections and
 systematic absences.
;
 
_computing_data_collection        'APEX (Bruker, 2014)' 
_computing_cell_refinement        'SAINT (Bruker, 2014)' 
_computing_data_reduction         'SAINT (Bruker, 2014)'
_computing_structure_solution   'SHELXL-2014/6 (Sheldrick, 2014)'
_computing_structure_refinement 'SHELXL-2014/6 (Sheldrick, 2014)'
_computing_molecular_graphics   'SHELXL-2014/6 (Sheldrick, 2014)'
_computing_publication_material   
'SHELXL-2014/6 (Sheldrick, 2014) and PLATON (Spek, 2015)'
_refine_special_details           ?
_refine_ls_structure_factor_coef  Fsqd
_refine_ls_matrix_type            full
_refine_ls_weighting_scheme       calc
_refine_ls_weighting_details
'w=1/[\s^2^(Fo^2^)+(0.0350P)^2^+0.2457P] where P=(Fo^2^+2Fc^2^)/3'
_atom_sites_solution_primary      direct
_atom_sites_solution_secondary    difmap
_atom_sites_solution_hydrogens    geom
_refine_ls_hydrogen_treatment     constr
_refine_ls_extinction_method      none
_refine_ls_extinction_coef        .
_refine_ls_number_reflns          2349
_refine_ls_number_parameters      136
_refine_ls_number_restraints      0
_refine_ls_R_factor_all           0.0464
_refine_ls_R_factor_gt            0.0347
_refine_ls_wR_factor_ref          0.0797
_refine_ls_wR_factor_gt           0.0741
_refine_ls_goodness_of_fit_ref    1.024
_refine_ls_restrained_S_all       1.024
_refine_ls_shift/su_max           0.001
_refine_ls_shift/su_mean          0.000
 
loop_
 _atom_site_label
 _atom_site_type_symbol
 _atom_site_fract_x
 _atom_site_fract_y
 _atom_site_fract_z
 _atom_site_U_iso_or_equiv
 _atom_site_adp_type
 _atom_site_occupancy
 _atom_site_site_symmetry_order  
 _atom_site_calc_flag
 _atom_site_refinement_flags_posn
 _atom_site_refinement_flags_adp
 _atom_site_refinement_flags_occupancy
 _atom_site_disorder_assembly
 _atom_site_disorder_group
Br8 Br 0.14850(4) 0.44213(6) 0.47123(2) 0.04278(16) Uani 1 1 d . . . . .
Br9 Br 0.09331(4) 0.53925(6) 0.31032(2) 0.04006(15) Uani 1 1 d . . . . .
Br12 Br 0.27603(4) 0.17959(6) 0.35015(2) 0.03758(15) Uani 1 1 d . . . . .
C1 C 0.4018(4) 0.7560(6) 0.3862(2) 0.0404(12) Uani 1 1 d . . . . .
H1 H 0.4303 0.8798 0.3941 0.049 Uiso 1 1 calc R U . . .
C2 C 0.4830(5) 0.6046(7) 0.4032(3) 0.0578(16) Uani 1 1 d . . . . .
H2 H 0.5670 0.6221 0.4224 0.069 Uiso 1 1 calc R U . . .
B3 B 0.3673(4) 0.6459(7) 0.4454(2) 0.0358(13) Uani 1 1 d . . . . .
H3 H 0.3706 0.6881 0.4914 0.043 Uiso 1 1 calc R U . . .
B4 B 0.2670(4) 0.7158(6) 0.3950(2) 0.0300(11) Uani 1 1 d . . . . .
H4 H 0.2033 0.8045 0.4080 0.036 Uiso 1 1 calc R U . . .
B5 B 0.3269(5) 0.7190(7) 0.3250(2) 0.0354(12) Uani 1 1 d . . . . .
H5 H 0.3039 0.8098 0.2918 0.043 Uiso 1 1 calc R U . . .
B6 B 0.4587(4) 0.6460(7) 0.3338(3) 0.0393(14) Uani 1 1 d . . . . .
H6 H 0.5260 0.6922 0.3054 0.047 Uiso 1 1 calc R U . . .
B7 B 0.4030(4) 0.4489(7) 0.4256(2) 0.0360(13) Uani 1 1 d . . . . .
H7 H 0.4294 0.3606 0.4590 0.043 Uiso 1 1 calc R U . . .
B8 B 0.2638(4) 0.5162(7) 0.4193(2) 0.0295(11) Uani 1 1 d . . . . .
B9 B 0.2387(4) 0.5625(6) 0.3451(2) 0.0268(11) Uani 1 1 d . . . . .
B10 B 0.3619(5) 0.5217(6) 0.3053(2) 0.0350(12) Uani 1 1 d . . . . .
H10 H 0.3606 0.4814 0.2591 0.042 Uiso 1 1 calc R U . . .
B11 B 0.4626(4) 0.4525(7) 0.3548(2) 0.0366(13) Uani 1 1 d . . . . .
H11 H 0.5283 0.3674 0.3412 0.044 Uiso 1 1 calc R U . . .
B12 B 0.3228(4) 0.3956(6) 0.3640(2) 0.0292(11) Uani 1 1 d . . . . .
 
loop_
 _atom_site_aniso_label
 _atom_site_aniso_U_11
 _atom_site_aniso_U_22
 _atom_site_aniso_U_33
 _atom_site_aniso_U_23
 _atom_site_aniso_U_13
 _atom_site_aniso_U_12
Br8 0.0489(3) 0.0396(3) 0.0399(3) -0.0004(2) 0.0153(2) -0.0071(2)
Br9 0.0330(3) 0.0439(3) 0.0433(3) -0.0062(2) -0.0113(2) 0.0051(2)
Br12 0.0373(3) 0.0257(3) 0.0497(3) -0.0041(2) 0.0015(2) -0.0027(2)
C1 0.033(3) 0.035(3) 0.053(3) -0.006(2) 0.004(2) -0.009(2)
C2 0.041(3) 0.047(3) 0.086(4) -0.022(3) 0.015(3) -0.009(3)
B3 0.033(3) 0.034(3) 0.040(3) -0.008(2) -0.003(2) 0.001(2)
B4 0.029(3) 0.027(3) 0.034(3) -0.003(2) 0.002(2) -0.005(2)
B5 0.039(3) 0.025(3) 0.042(3) 0.003(2) 0.008(2) -0.004(2)
B6 0.030(3) 0.030(3) 0.057(4) -0.014(3) 0.008(3) -0.006(2)
B7 0.032(3) 0.040(3) 0.036(3) -0.003(2) -0.006(2) 0.000(2)
B8 0.024(3) 0.035(3) 0.030(3) 0.002(2) 0.0036(19) -0.001(2)
B9 0.027(3) 0.024(3) 0.029(3) 0.001(2) -0.001(2) 0.000(2)
B10 0.040(3) 0.030(3) 0.036(3) 0.001(2) 0.007(2) -0.005(2)
B11 0.025(3) 0.036(3) 0.049(3) -0.008(3) 0.006(2) -0.002(2)
B12 0.029(3) 0.025(3) 0.033(3) -0.002(2) 0.001(2) -0.002(2)
 
_geom_special_details
;
 All esds (except the esd in the dihedral angle between two l.s. planes)
 are estimated using the full covariance matrix.  The cell esds are taken
 into account individually in the estimation of esds in distances, angles
 and torsion angles; correlations between esds in cell parameters are only
 used when they are defined by crystal symmetry.  An approximate (isotropic)
 treatment of cell esds is used for estimating esds involving l.s. planes.
;
 
loop_
 _geom_bond_atom_site_label_1
 _geom_bond_atom_site_label_2
 _geom_bond_distance
 _geom_bond_site_symmetry_2
 _geom_bond_publ_flag
Br8 B8 1.948(5) . ?
Br9 B9 1.948(5) . ?
Br12 B12 1.944(5) . ?
C1 C2 1.666(8) . ?
C1 B6 1.676(7) . ?
C1 B4 1.685(7) . ?
C1 B3 1.706(8) . ?
C1 B5 1.708(7) . ?
C1 H1 1.1200 . ?
C2 B6 1.665(9) . ?
C2 B7 1.719(8) . ?
C2 B11 1.724(8) . ?
C2 B3 1.746(8) . ?
C2 H2 1.1200 . ?
B3 B8 1.775(7) . ?
B3 B4 1.783(7) . ?
B3 B7 1.786(8) . ?
B3 H3 1.1200 . ?
B4 B9 1.770(7) . ?
B4 B5 1.772(7) . ?
B4 B8 1.783(8) . ?
B4 H4 1.1200 . ?
B5 B6 1.728(8) . ?
B5 B9 1.767(7) . ?
B5 B10 1.785(8) . ?
B5 H5 1.1200 . ?
B6 B10 1.709(8) . ?
B6 B11 1.711(8) . ?
B6 H6 1.1200 . ?
B7 B12 1.780(7) . ?
B7 B11 1.789(8) . ?
B7 B8 1.790(7) . ?
B7 H7 1.1200 . ?
B8 B9 1.782(7) . ?
B8 B12 1.786(7) . ?
B9 B10 1.790(7) . ?
B9 B12 1.799(7) . ?
B10 B11 1.770(8) . ?
B10 B12 1.790(7) . ?
B10 H10 1.1200 . ?
B11 B12 1.778(7) . ?
B11 H11 1.1200 . ?
 
loop_
 _geom_angle_atom_site_label_1
 _geom_angle_atom_site_label_2
 _geom_angle_atom_site_label_3
 _geom_angle
 _geom_angle_site_symmetry_1
 _geom_angle_site_symmetry_3
 _geom_angle_publ_flag
C2 C1 B6 59.8(3) . . ?
C2 C1 B4 113.0(4) . . ?
B6 C1 B4 112.1(4) . . ?
C2 C1 B3 62.3(3) . . ?
B6 C1 B3 112.0(4) . . ?
B4 C1 B3 63.5(3) . . ?
C2 C1 B5 111.6(4) . . ?
B6 C1 B5 61.4(3) . . ?
B4 C1 B5 63.0(3) . . ?
B3 C1 B5 115.4(4) . . ?
C2 C1 H1 120.1 . . ?
B6 C1 H1 120.7 . . ?
B4 C1 H1 118.1 . . ?
B3 C1 H1 117.3 . . ?
B5 C1 H1 118.1 . . ?
B6 C2 C1 60.4(3) . . ?
B6 C2 B7 110.6(4) . . ?
C1 C2 B7 109.2(4) . . ?
B6 C2 B11 60.6(3) . . ?
C1 C2 B11 109.8(4) . . ?
B7 C2 B11 62.6(3) . . ?
B6 C2 B3 110.5(4) . . ?
C1 C2 B3 60.0(3) . . ?
B7 C2 B3 62.0(3) . . ?
B11 C2 B3 113.3(4) . . ?
B6 C2 H2 120.7 . . ?
C1 C2 H2 121.9 . . ?
B7 C2 H2 119.9 . . ?
B11 C2 H2 119.0 . . ?
B3 C2 H2 119.2 . . ?
C1 B3 C2 57.7(3) . . ?
C1 B3 B8 104.0(4) . . ?
C2 B3 B8 104.9(4) . . ?
C1 B3 B4 57.7(3) . . ?
C2 B3 B4 104.7(4) . . ?
B8 B3 B4 60.1(3) . . ?
C1 B3 B7 104.3(4) . . ?
C2 B3 B7 58.3(3) . . ?
B8 B3 B7 60.4(3) . . ?
B4 B3 B7 108.1(4) . . ?
C1 B3 H3 125.1 . . ?
C2 B3 H3 124.3 . . ?
B8 B3 H3 122.9 . . ?
B4 B3 H3 122.3 . . ?
B7 B3 H3 122.1 . . ?
C1 B4 B9 105.0(4) . . ?
C1 B4 B5 59.1(3) . . ?
B9 B4 B5 59.9(3) . . ?
C1 B4 B8 104.6(4) . . ?
B9 B4 B8 60.2(3) . . ?
B5 B4 B8 108.1(4) . . ?
C1 B4 B3 58.8(3) . . ?
B9 B4 B3 108.2(4) . . ?
B5 B4 B3 108.5(4) . . ?
B8 B4 B3 59.7(3) . . ?
C1 B4 H4 124.6 . . ?
B9 B4 H4 122.3 . . ?
B5 B4 H4 121.2 . . ?
B8 B4 H4 122.5 . . ?
B3 B4 H4 121.3 . . ?
C1 B5 B6 58.4(3) . . ?
C1 B5 B9 104.1(4) . . ?
B6 B5 B9 105.2(4) . . ?
C1 B5 B4 57.9(3) . . ?
B6 B5 B4 105.5(4) . . ?
B9 B5 B4 60.0(3) . . ?
C1 B5 B10 104.8(4) . . ?
B6 B5 B10 58.2(3) . . ?
B9 B5 B10 60.5(3) . . ?
B4 B5 B10 108.4(4) . . ?
C1 B5 H5 124.8 . . ?
B6 B5 H5 123.8 . . ?
B9 B5 H5 123.0 . . ?
B4 B5 H5 122.0 . . ?
B10 B5 H5 122.0 . . ?
C2 B6 C1 59.8(3) . . ?
C2 B6 B10 111.2(4) . . ?
C1 B6 B10 109.7(4) . . ?
C2 B6 B11 61.4(3) . . ?
C1 B6 B11 110.0(4) . . ?
B10 B6 B11 62.4(3) . . ?
C2 B6 B5 110.6(4) . . ?
C1 B6 B5 60.2(3) . . ?
B10 B6 B5 62.6(3) . . ?
B11 B6 B5 113.7(4) . . ?
C2 B6 H6 120.6 . . ?
C1 B6 H6 122.0 . . ?
B10 B6 H6 119.5 . . ?
B11 B6 H6 118.7 . . ?
B5 B6 H6 118.8 . . ?
C2 B7 B12 105.3(4) . . ?
C2 B7 B3 59.7(3) . . ?
B12 B7 B3 107.9(4) . . ?
C2 B7 B11 58.8(3) . . ?
B12 B7 B11 59.8(3) . . ?
B3 B7 B11 108.4(4) . . ?
C2 B7 B8 105.3(4) . . ?
B12 B7 B8 60.0(3) . . ?
B3 B7 B8 59.5(3) . . ?
B11 B7 B8 107.6(4) . . ?
C2 B7 H7 123.9 . . ?
B12 B7 H7 122.4 . . ?
B3 B7 H7 121.3 . . ?
B11 B7 H7 121.6 . . ?
B8 B7 H7 122.6 . . ?
B3 B8 B9 108.0(4) . . ?
B3 B8 B4 60.2(3) . . ?
B9 B8 B4 59.5(3) . . ?
B3 B8 B12 108.2(4) . . ?
B9 B8 B12 60.6(3) . . ?
B4 B8 B12 108.1(4) . . ?
B3 B8 B7 60.1(3) . . ?
B9 B8 B7 108.0(4) . . ?
B4 B8 B7 107.9(4) . . ?
B12 B8 B7 59.7(3) . . ?
B3 B8 Br8 120.1(3) . . ?
B9 B8 Br8 122.7(3) . . ?
B4 B8 Br8 121.0(3) . . ?
B12 B8 Br8 123.0(3) . . ?
B7 B8 Br8 121.8(3) . . ?
B5 B9 B4 60.2(3) . . ?
B5 B9 B8 108.3(4) . . ?
B4 B9 B8 60.3(3) . . ?
B5 B9 B10 60.2(3) . . ?
B4 B9 B10 108.3(4) . . ?
B8 B9 B10 107.9(4) . . ?
B5 B9 B12 108.1(4) . . ?
B4 B9 B12 108.1(3) . . ?
B8 B9 B12 59.8(3) . . ?
B10 B9 B12 59.8(3) . . ?
B5 B9 Br9 121.1(3) . . ?
B4 B9 Br9 121.1(3) . . ?
B8 B9 Br9 121.8(3) . . ?
B10 B9 Br9 121.8(3) . . ?
B12 B9 Br9 122.3(3) . . ?
B6 B10 B11 58.9(3) . . ?
B6 B10 B5 59.2(3) . . ?
B11 B10 B5 108.2(4) . . ?
B6 B10 B12 105.1(4) . . ?
B11 B10 B12 59.9(3) . . ?
B5 B10 B12 107.7(4) . . ?
B6 B10 B9 105.0(4) . . ?
B11 B10 B9 108.1(4) . . ?
B5 B10 B9 59.2(3) . . ?
B12 B10 B9 60.3(3) . . ?
B6 B10 H10 124.3 . . ?
B11 B10 H10 121.4 . . ?
B5 B10 H10 121.7 . . ?
B12 B10 H10 122.3 . . ?
B9 B10 H10 122.4 . . ?
B6 B11 C2 58.0(3) . . ?
B6 B11 B10 58.8(3) . . ?
C2 B11 B10 105.6(4) . . ?
B6 B11 B12 105.5(4) . . ?
C2 B11 B12 105.2(4) . . ?
B10 B11 B12 60.6(3) . . ?
B6 B11 B7 105.3(4) . . ?
C2 B11 B7 58.6(3) . . ?
B10 B11 B7 108.3(4) . . ?
B12 B11 B7 59.9(3) . . ?
B6 B11 H11 124.0 . . ?
C2 B11 H11 124.1 . . ?
B10 B11 H11 121.7 . . ?
B12 B11 H11 122.6 . . ?
B7 B11 H11 122.2 . . ?
B11 B12 B7 60.4(3) . . ?
B11 B12 B8 108.3(4) . . ?
B7 B12 B8 60.3(3) . . ?
B11 B12 B10 59.5(3) . . ?
B7 B12 B10 107.9(4) . . ?
B8 B12 B10 107.8(4) . . ?
B11 B12 B9 107.4(4) . . ?
B7 B12 B9 107.7(4) . . ?
B8 B12 B9 59.6(3) . . ?
B10 B12 B9 59.9(3) . . ?
B11 B12 Br12 121.0(3) . . ?
B7 B12 Br12 122.0(4) . . ?
B8 B12 Br12 122.7(3) . . ?
B10 B12 Br12 121.1(3) . . ?
B9 B12 Br12 122.4(3) . . ?
 
loop_
 _geom_torsion_atom_site_label_1
 _geom_torsion_atom_site_label_2
 _geom_torsion_atom_site_label_3
 _geom_torsion_atom_site_label_4
 _geom_torsion
 _geom_torsion_site_symmetry_1
 _geom_torsion_site_symmetry_2
 _geom_torsion_site_symmetry_3
 _geom_torsion_site_symmetry_4
 _geom_torsion_publ_flag
B4 C1 C2 B6 103.0(4) . . . . ?
B3 C1 C2 B6 142.6(4) . . . . ?
B5 C1 C2 B6 34.3(4) . . . . ?
B6 C1 C2 B7 -103.3(5) . . . . ?
B4 C1 C2 B7 -0.3(6) . . . . ?
B3 C1 C2 B7 39.3(4) . . . . ?
B5 C1 C2 B7 -69.0(5) . . . . ?
B6 C1 C2 B11 -36.4(4) . . . . ?
B4 C1 C2 B11 66.6(5) . . . . ?
B3 C1 C2 B11 106.1(4) . . . . ?
B5 C1 C2 B11 -2.2(5) . . . . ?
B6 C1 C2 B3 -142.6(4) . . . . ?
B4 C1 C2 B3 -39.6(4) . . . . ?
B5 C1 C2 B3 -108.3(4) . . . . ?
B6 C1 B3 C2 34.5(4) . . . . ?
B4 C1 B3 C2 139.0(4) . . . . ?
B5 C1 B3 C2 102.2(5) . . . . ?
C2 C1 B3 B8 -98.9(4) . . . . ?
B6 C1 B3 B8 -64.5(5) . . . . ?
B4 C1 B3 B8 40.1(4) . . . . ?
B5 C1 B3 B8 3.2(5) . . . . ?
C2 C1 B3 B4 -139.0(4) . . . . ?
B6 C1 B3 B4 -104.6(4) . . . . ?
B5 C1 B3 B4 -36.9(4) . . . . ?
C2 C1 B3 B7 -36.5(4) . . . . ?
B6 C1 B3 B7 -2.0(5) . . . . ?
B4 C1 B3 B7 102.6(4) . . . . ?
B5 C1 B3 B7 65.7(5) . . . . ?
B6 C2 B3 C1 -34.3(4) . . . . ?
B7 C2 B3 C1 -137.4(4) . . . . ?
B11 C2 B3 C1 -100.2(5) . . . . ?
B6 C2 B3 B8 63.0(5) . . . . ?
C1 C2 B3 B8 97.4(4) . . . . ?
B7 C2 B3 B8 -40.0(4) . . . . ?
B11 C2 B3 B8 -2.8(6) . . . . ?
B6 C2 B3 B4 0.6(5) . . . . ?
C1 C2 B3 B4 35.0(3) . . . . ?
B7 C2 B3 B4 -102.4(4) . . . . ?
B11 C2 B3 B4 -65.2(5) . . . . ?
B6 C2 B3 B7 103.0(4) . . . . ?
C1 C2 B3 B7 137.4(4) . . . . ?
B11 C2 B3 B7 37.2(4) . . . . ?
C2 C1 B4 B9 -63.3(5) . . . . ?
B6 C1 B4 B9 2.0(5) . . . . ?
B3 C1 B4 B9 -102.5(4) . . . . ?
B5 C1 B4 B9 40.1(4) . . . . ?
C2 C1 B4 B5 -103.4(4) . . . . ?
B6 C1 B4 B5 -38.1(4) . . . . ?
B3 C1 B4 B5 -142.6(4) . . . . ?
C2 C1 B4 B8 -0.8(5) . . . . ?
B6 C1 B4 B8 64.4(5) . . . . ?
B3 C1 B4 B8 -40.0(3) . . . . ?
B5 C1 B4 B8 102.6(4) . . . . ?
C2 C1 B4 B3 39.1(4) . . . . ?
B6 C1 B4 B3 104.4(5) . . . . ?
B5 C1 B4 B3 142.6(4) . . . . ?
C2 B3 B4 C1 -35.0(4) . . . . ?
B8 B3 B4 C1 -133.9(4) . . . . ?
B7 B3 B4 C1 -95.8(4) . . . . ?
C1 B3 B4 B9 96.8(4) . . . . ?
C2 B3 B4 B9 61.9(5) . . . . ?
B8 B3 B4 B9 -37.1(3) . . . . ?
B7 B3 B4 B9 1.0(5) . . . . ?
C1 B3 B4 B5 33.4(3) . . . . ?
C2 B3 B4 B5 -1.6(5) . . . . ?
B8 B3 B4 B5 -100.5(4) . . . . ?
B7 B3 B4 B5 -62.4(5) . . . . ?
C1 B3 B4 B8 133.9(4) . . . . ?
C2 B3 B4 B8 99.0(4) . . . . ?
B7 B3 B4 B8 38.1(4) . . . . ?
C2 C1 B5 B6 -33.6(4) . . . . ?
B4 C1 B5 B6 -139.3(4) . . . . ?
B3 C1 B5 B6 -102.3(5) . . . . ?
C2 C1 B5 B9 65.7(5) . . . . ?
B6 C1 B5 B9 99.3(4) . . . . ?
B4 C1 B5 B9 -40.0(4) . . . . ?
B3 C1 B5 B9 -2.9(5) . . . . ?
C2 C1 B5 B4 105.7(4) . . . . ?
B6 C1 B5 B4 139.3(4) . . . . ?
B3 C1 B5 B4 37.0(4) . . . . ?
C2 C1 B5 B10 3.0(5) . . . . ?
B6 C1 B5 B10 36.6(4) . . . . ?
B4 C1 B5 B10 -102.7(4) . . . . ?
B3 C1 B5 B10 -65.7(5) . . . . ?
B9 B4 B5 C1 -134.0(4) . . . . ?
B8 B4 B5 C1 -96.5(4) . . . . ?
B3 B4 B5 C1 -33.3(4) . . . . ?
C1 B4 B5 B6 35.2(4) . . . . ?
B9 B4 B5 B6 -98.8(4) . . . . ?
B8 B4 B5 B6 -61.3(5) . . . . ?
B3 B4 B5 B6 1.9(5) . . . . ?
C1 B4 B5 B9 134.0(4) . . . . ?
B8 B4 B5 B9 37.5(3) . . . . ?
B3 B4 B5 B9 100.7(4) . . . . ?
C1 B4 B5 B10 96.2(4) . . . . ?
B9 B4 B5 B10 -37.7(4) . . . . ?
B8 B4 B5 B10 -0.3(5) . . . . ?
B3 B4 B5 B10 62.9(5) . . . . ?
B7 C2 B6 C1 101.0(4) . . . . ?
B11 C2 B6 C1 140.1(4) . . . . ?
B3 C2 B6 C1 34.2(4) . . . . ?
C1 C2 B6 B10 -101.1(4) . . . . ?
B7 C2 B6 B10 -0.2(6) . . . . ?
B11 C2 B6 B10 39.0(4) . . . . ?
B3 C2 B6 B10 -67.0(5) . . . . ?
C1 C2 B6 B11 -140.1(4) . . . . ?
B7 C2 B6 B11 -39.2(4) . . . . ?
B3 C2 B6 B11 -105.9(4) . . . . ?
C1 C2 B6 B5 -33.6(4) . . . . ?
B7 C2 B6 B5 67.4(5) . . . . ?
B11 C2 B6 B5 106.5(4) . . . . ?
B3 C2 B6 B5 0.6(6) . . . . ?
B4 C1 B6 C2 -104.6(4) . . . . ?
B3 C1 B6 C2 -35.5(4) . . . . ?
B5 C1 B6 C2 -143.4(4) . . . . ?
C2 C1 B6 B10 103.6(5) . . . . ?
B4 C1 B6 B10 -1.0(6) . . . . ?
B3 C1 B6 B10 68.1(5) . . . . ?
B5 C1 B6 B10 -39.8(4) . . . . ?
C2 C1 B6 B11 36.8(4) . . . . ?
B4 C1 B6 B11 -67.8(5) . . . . ?
B3 C1 B6 B11 1.4(5) . . . . ?
B5 C1 B6 B11 -106.6(4) . . . . ?
C2 C1 B6 B5 143.4(4) . . . . ?
B4 C1 B6 B5 38.8(4) . . . . ?
B3 C1 B6 B5 107.9(4) . . . . ?
C1 B5 B6 C2 33.4(4) . . . . ?
B9 B5 B6 C2 -64.0(5) . . . . ?
B4 B5 B6 C2 -1.5(5) . . . . ?
B10 B5 B6 C2 -103.8(5) . . . . ?
B9 B5 B6 C1 -97.4(4) . . . . ?
B4 B5 B6 C1 -35.0(4) . . . . ?
B10 B5 B6 C1 -137.3(4) . . . . ?
C1 B5 B6 B10 137.3(4) . . . . ?
B9 B5 B6 B10 39.8(4) . . . . ?
B4 B5 B6 B10 102.3(4) . . . . ?
C1 B5 B6 B11 100.3(5) . . . . ?
B9 B5 B6 B11 2.9(6) . . . . ?
B4 B5 B6 B11 65.3(5) . . . . ?
B10 B5 B6 B11 -37.0(4) . . . . ?
B6 C2 B7 B12 -0.9(5) . . . . ?
C1 C2 B7 B12 63.8(5) . . . . ?
B11 C2 B7 B12 -39.2(4) . . . . ?
B3 C2 B7 B12 102.1(4) . . . . ?
B6 C2 B7 B3 -103.0(5) . . . . ?
C1 C2 B7 B3 -38.3(4) . . . . ?
B11 C2 B7 B3 -141.3(4) . . . . ?
B6 C2 B7 B11 38.3(4) . . . . ?
C1 C2 B7 B11 103.0(5) . . . . ?
B3 C2 B7 B11 141.3(4) . . . . ?
B6 C2 B7 B8 -63.3(5) . . . . ?
C1 C2 B7 B8 1.3(5) . . . . ?
B11 C2 B7 B8 -101.6(4) . . . . ?
B3 C2 B7 B8 39.7(4) . . . . ?
C1 B3 B7 C2 36.2(4) . . . . ?
B8 B3 B7 C2 134.4(4) . . . . ?
B4 B3 B7 C2 96.4(4) . . . . ?
C1 B3 B7 B12 -61.4(5) . . . . ?
C2 B3 B7 B12 -97.6(5) . . . . ?
B8 B3 B7 B12 36.8(4) . . . . ?
B4 B3 B7 B12 -1.2(5) . . . . ?
C1 B3 B7 B11 1.9(5) . . . . ?
C2 B3 B7 B11 -34.3(4) . . . . ?
B8 B3 B7 B11 100.1(4) . . . . ?
B4 B3 B7 B11 62.1(5) . . . . ?
C1 B3 B7 B8 -98.2(4) . . . . ?
C2 B3 B7 B8 -134.4(4) . . . . ?
B4 B3 B7 B8 -38.0(3) . . . . ?
C1 B3 B8 B9 -2.1(5) . . . . ?
C2 B3 B8 B9 -61.9(5) . . . . ?
B4 B3 B8 B9 36.8(3) . . . . ?
B7 B3 B8 B9 -100.8(4) . . . . ?
C1 B3 B8 B4 -38.9(3) . . . . ?
C2 B3 B8 B4 -98.6(4) . . . . ?
B7 B3 B8 B4 -137.6(4) . . . . ?
C1 B3 B8 B12 62.0(4) . . . . ?
C2 B3 B8 B12 2.2(5) . . . . ?
B4 B3 B8 B12 100.8(4) . . . . ?
B7 B3 B8 B12 -36.8(4) . . . . ?
C1 B3 B8 B7 98.7(4) . . . . ?
C2 B3 B8 B7 39.0(4) . . . . ?
B4 B3 B8 B7 137.6(4) . . . . ?
C1 B3 B8 Br8 -149.6(3) . . . . ?
C2 B3 B8 Br8 150.6(4) . . . . ?
B4 B3 B8 Br8 -110.8(4) . . . . ?
B7 B3 B8 Br8 111.6(4) . . . . ?
C1 B4 B8 B3 39.6(3) . . . . ?
B9 B4 B8 B3 138.7(4) . . . . ?
B5 B4 B8 B3 101.4(4) . . . . ?
C1 B4 B8 B9 -99.1(4) . . . . ?
B5 B4 B8 B9 -37.3(3) . . . . ?
B3 B4 B8 B9 -138.7(4) . . . . ?
C1 B4 B8 B12 -61.5(4) . . . . ?
B9 B4 B8 B12 37.6(3) . . . . ?
B5 B4 B8 B12 0.3(5) . . . . ?
B3 B4 B8 B12 -101.0(4) . . . . ?
C1 B4 B8 B7 1.6(5) . . . . ?
B9 B4 B8 B7 100.8(4) . . . . ?
B5 B4 B8 B7 63.4(5) . . . . ?
B3 B4 B8 B7 -37.9(4) . . . . ?
C1 B4 B8 Br8 148.8(3) . . . . ?
B9 B4 B8 Br8 -112.1(4) . . . . ?
B5 B4 B8 Br8 -149.5(3) . . . . ?
B3 B4 B8 Br8 109.2(4) . . . . ?
C2 B7 B8 B3 -39.8(4) . . . . ?
B12 B7 B8 B3 -138.8(4) . . . . ?
B11 B7 B8 B3 -101.4(4) . . . . ?
C2 B7 B8 B9 61.1(5) . . . . ?
B12 B7 B8 B9 -38.0(4) . . . . ?
B3 B7 B8 B9 100.8(4) . . . . ?
B11 B7 B8 B9 -0.5(5) . . . . ?
C2 B7 B8 B4 -1.8(5) . . . . ?
B12 B7 B8 B4 -100.9(4) . . . . ?
B3 B7 B8 B4 37.9(4) . . . . ?
B11 B7 B8 B4 -63.4(5) . . . . ?
C2 B7 B8 B12 99.0(4) . . . . ?
B3 B7 B8 B12 138.8(4) . . . . ?
B11 B7 B8 B12 37.5(3) . . . . ?
C2 B7 B8 Br8 -148.7(4) . . . . ?
B12 B7 B8 Br8 112.3(4) . . . . ?
B3 B7 B8 Br8 -108.9(4) . . . . ?
B11 B7 B8 Br8 149.8(4) . . . . ?
C1 B5 B9 B4 38.9(3) . . . . ?
B6 B5 B9 B4 99.4(4) . . . . ?
B10 B5 B9 B4 138.2(4) . . . . ?
C1 B5 B9 B8 1.3(5) . . . . ?
B6 B5 B9 B8 61.9(5) . . . . ?
B4 B5 B9 B8 -37.6(4) . . . . ?
B10 B5 B9 B8 100.6(4) . . . . ?
C1 B5 B9 B10 -99.2(4) . . . . ?
B6 B5 B9 B10 -38.7(4) . . . . ?
B4 B5 B9 B10 -138.2(4) . . . . ?
C1 B5 B9 B12 -62.0(4) . . . . ?
B6 B5 B9 B12 -1.5(5) . . . . ?
B4 B5 B9 B12 -100.9(4) . . . . ?
B10 B5 B9 B12 37.2(3) . . . . ?
C1 B5 B9 Br9 149.4(3) . . . . ?
B6 B5 B9 Br9 -150.1(4) . . . . ?
B4 B5 B9 Br9 110.5(4) . . . . ?
B10 B5 B9 Br9 -111.4(4) . . . . ?
C1 B4 B9 B5 -39.7(4) . . . . ?
B8 B4 B9 B5 -138.2(4) . . . . ?
B3 B4 B9 B5 -101.3(4) . . . . ?
C1 B4 B9 B8 98.5(4) . . . . ?
B5 B4 B9 B8 138.2(4) . . . . ?
B3 B4 B9 B8 36.9(3) . . . . ?
C1 B4 B9 B10 -2.2(5) . . . . ?
B5 B4 B9 B10 37.6(4) . . . . ?
B8 B4 B9 B10 -100.6(4) . . . . ?
B3 B4 B9 B10 -63.8(4) . . . . ?
C1 B4 B9 B12 61.1(4) . . . . ?
B5 B4 B9 B12 100.9(4) . . . . ?
B8 B4 B9 B12 -37.3(3) . . . . ?
B3 B4 B9 B12 -0.4(5) . . . . ?
C1 B4 B9 Br9 -150.2(3) . . . . ?
B5 B4 B9 Br9 -110.5(4) . . . . ?
B8 B4 B9 Br9 111.3(4) . . . . ?
B3 B4 B9 Br9 148.2(3) . . . . ?
B3 B8 B9 B5 0.5(5) . . . . ?
B4 B8 B9 B5 37.5(4) . . . . ?
B12 B8 B9 B5 -100.7(4) . . . . ?
B7 B8 B9 B5 -63.1(5) . . . . ?
Br8 B8 B9 B5 147.0(4) . . . . ?
B3 B8 B9 B4 -37.0(3) . . . . ?
B12 B8 B9 B4 -138.2(4) . . . . ?
B7 B8 B9 B4 -100.6(4) . . . . ?
Br8 B8 B9 B4 109.4(4) . . . . ?
B3 B8 B9 B10 64.2(5) . . . . ?
B4 B8 B9 B10 101.2(4) . . . . ?
B12 B8 B9 B10 -37.0(3) . . . . ?
B7 B8 B9 B10 0.6(5) . . . . ?
Br8 B8 B9 B10 -149.3(3) . . . . ?
B3 B8 B9 B12 101.2(4) . . . . ?
B4 B8 B9 B12 138.2(4) . . . . ?
B7 B8 B9 B12 37.6(3) . . . . ?
Br8 B8 B9 B12 -112.3(4) . . . . ?
B3 B8 B9 Br9 -147.3(3) . . . . ?
B4 B8 B9 Br9 -110.3(4) . . . . ?
B12 B8 B9 Br9 111.5(4) . . . . ?
B7 B8 B9 Br9 149.1(3) . . . . ?
Br8 B8 B9 Br9 -0.8(6) . . . . ?
C2 B6 B10 B11 -38.6(4) . . . . ?
C1 B6 B10 B11 -102.8(5) . . . . ?
B5 B6 B10 B11 -141.6(4) . . . . ?
C2 B6 B10 B5 103.0(4) . . . . ?
C1 B6 B10 B5 38.7(4) . . . . ?
B11 B6 B10 B5 141.6(4) . . . . ?
C2 B6 B10 B12 1.1(5) . . . . ?
C1 B6 B10 B12 -63.1(5) . . . . ?
B11 B6 B10 B12 39.7(4) . . . . ?
B5 B6 B10 B12 -101.9(4) . . . . ?
C2 B6 B10 B9 63.8(5) . . . . ?
C1 B6 B10 B9 -0.5(5) . . . . ?
B11 B6 B10 B9 102.4(4) . . . . ?
B5 B6 B10 B9 -39.2(4) . . . . ?
C1 B5 B10 B6 -36.7(4) . . . . ?
B9 B5 B10 B6 -134.7(4) . . . . ?
B4 B5 B10 B6 -97.2(4) . . . . ?
C1 B5 B10 B11 -2.7(5) . . . . ?
B6 B5 B10 B11 34.0(4) . . . . ?
B9 B5 B10 B11 -100.7(4) . . . . ?
B4 B5 B10 B11 -63.2(5) . . . . ?
C1 B5 B10 B12 60.7(4) . . . . ?
B6 B5 B10 B12 97.4(4) . . . . ?
B9 B5 B10 B12 -37.4(3) . . . . ?
B4 B5 B10 B12 0.1(5) . . . . ?
C1 B5 B10 B9 98.0(4) . . . . ?
B6 B5 B10 B9 134.7(4) . . . . ?
B4 B5 B10 B9 37.5(3) . . . . ?
B5 B9 B10 B6 39.2(4) . . . . ?
B4 B9 B10 B6 1.6(5) . . . . ?
B8 B9 B10 B6 -62.1(5) . . . . ?
B12 B9 B10 B6 -99.1(4) . . . . ?
Br9 B9 B10 B6 149.4(4) . . . . ?
B5 B9 B10 B11 100.8(4) . . . . ?
B4 B9 B10 B11 63.2(4) . . . . ?
B8 B9 B10 B11 -0.5(5) . . . . ?
B12 B9 B10 B11 -37.5(3) . . . . ?
Br9 B9 B10 B11 -149.0(3) . . . . ?
B4 B9 B10 B5 -37.5(4) . . . . ?
B8 B9 B10 B5 -101.3(4) . . . . ?
B12 B9 B10 B5 -138.3(4) . . . . ?
Br9 B9 B10 B5 110.3(4) . . . . ?
B5 B9 B10 B12 138.3(4) . . . . ?
B4 B9 B10 B12 100.7(4) . . . . ?
B8 B9 B10 B12 37.0(3) . . . . ?
Br9 B9 B10 B12 -111.5(4) . . . . ?
C1 B6 B11 C2 -36.2(4) . . . . ?
B10 B6 B11 C2 -138.5(4) . . . . ?
B5 B6 B11 C2 -101.5(5) . . . . ?
C2 B6 B11 B10 138.5(4) . . . . ?
C1 B6 B11 B10 102.4(4) . . . . ?
B5 B6 B11 B10 37.0(4) . . . . ?
C2 B6 B11 B12 98.4(4) . . . . ?
C1 B6 B11 B12 62.3(5) . . . . ?
B10 B6 B11 B12 -40.1(4) . . . . ?
B5 B6 B11 B12 -3.1(6) . . . . ?
C2 B6 B11 B7 36.1(4) . . . . ?
C1 B6 B11 B7 -0.1(5) . . . . ?
B10 B6 B11 B7 -102.5(4) . . . . ?
B5 B6 B11 B7 -65.4(5) . . . . ?
C1 C2 B11 B6 36.4(4) . . . . ?
B7 C2 B11 B6 138.3(4) . . . . ?
B3 C2 B11 B6 101.3(5) . . . . ?
B6 C2 B11 B10 -36.0(4) . . . . ?
C1 C2 B11 B10 0.4(5) . . . . ?
B7 C2 B11 B10 102.3(4) . . . . ?
B3 C2 B11 B10 65.3(5) . . . . ?
B6 C2 B11 B12 -99.1(4) . . . . ?
C1 C2 B11 B12 -62.7(5) . . . . ?
B7 C2 B11 B12 39.2(4) . . . . ?
B3 C2 B11 B12 2.2(6) . . . . ?
B6 C2 B11 B7 -138.3(4) . . . . ?
C1 C2 B11 B7 -101.9(4) . . . . ?
B3 C2 B11 B7 -37.0(4) . . . . ?
B5 B10 B11 B6 -34.2(4) . . . . ?
B12 B10 B11 B6 -134.6(4) . . . . ?
B9 B10 B11 B6 -96.9(4) . . . . ?
B6 B10 B11 C2 35.7(4) . . . . ?
B5 B10 B11 C2 1.5(5) . . . . ?
B12 B10 B11 C2 -98.9(4) . . . . ?
B9 B10 B11 C2 -61.2(5) . . . . ?
B6 B10 B11 B12 134.6(4) . . . . ?
B5 B10 B11 B12 100.4(4) . . . . ?
B9 B10 B11 B12 37.7(3) . . . . ?
B6 B10 B11 B7 97.1(4) . . . . ?
B5 B10 B11 B7 62.9(5) . . . . ?
B12 B10 B11 B7 -37.5(4) . . . . ?
B9 B10 B11 B7 0.2(5) . . . . ?
C2 B7 B11 B6 -35.8(4) . . . . ?
B12 B7 B11 B6 99.4(4) . . . . ?
B3 B7 B11 B6 -1.1(5) . . . . ?
B8 B7 B11 B6 61.8(5) . . . . ?
B12 B7 B11 C2 135.2(4) . . . . ?
B3 B7 B11 C2 34.7(4) . . . . ?
B8 B7 B11 C2 97.6(4) . . . . ?
C2 B7 B11 B10 -97.4(4) . . . . ?
B12 B7 B11 B10 37.8(4) . . . . ?
B3 B7 B11 B10 -62.7(5) . . . . ?
B8 B7 B11 B10 0.2(5) . . . . ?
C2 B7 B11 B12 -135.2(4) . . . . ?
B3 B7 B11 B12 -100.5(4) . . . . ?
B8 B7 B11 B12 -37.6(3) . . . . ?
B6 B11 B12 B7 -98.9(4) . . . . ?
C2 B11 B12 B7 -38.6(4) . . . . ?
B10 B11 B12 B7 -138.1(4) . . . . ?
B6 B11 B12 B8 -61.0(5) . . . . ?
C2 B11 B12 B8 -0.7(5) . . . . ?
B10 B11 B12 B8 -100.3(4) . . . . ?
B7 B11 B12 B8 37.9(4) . . . . ?
B6 B11 B12 B10 39.2(4) . . . . ?
C2 B11 B12 B10 99.6(4) . . . . ?
B7 B11 B12 B10 138.1(4) . . . . ?
B6 B11 B12 B9 1.9(5) . . . . ?
C2 B11 B12 B9 62.3(5) . . . . ?
B10 B11 B12 B9 -37.3(4) . . . . ?
B7 B11 B12 B9 100.8(4) . . . . ?
B6 B11 B12 Br12 149.5(4) . . . . ?
C2 B11 B12 Br12 -150.2(4) . . . . ?
B10 B11 B12 Br12 110.2(4) . . . . ?
B7 B11 B12 Br12 -111.7(4) . . . . ?
C2 B7 B12 B11 38.7(4) . . . . ?
B3 B7 B12 B11 101.2(4) . . . . ?
B8 B7 B12 B11 137.9(4) . . . . ?
C2 B7 B12 B8 -99.1(4) . . . . ?
B3 B7 B12 B8 -36.6(4) . . . . ?
B11 B7 B12 B8 -137.9(4) . . . . ?
C2 B7 B12 B10 1.5(5) . . . . ?
B3 B7 B12 B10 64.1(5) . . . . ?
B11 B7 B12 B10 -37.2(4) . . . . ?
B8 B7 B12 B10 100.7(4) . . . . ?
C2 B7 B12 B9 -61.7(4) . . . . ?
B3 B7 B12 B9 0.9(5) . . . . ?
B11 B7 B12 B9 -100.4(4) . . . . ?
B8 B7 B12 B9 37.5(3) . . . . ?
C2 B7 B12 Br12 148.8(3) . . . . ?
B3 B7 B12 Br12 -148.7(4) . . . . ?
B11 B7 B12 Br12 110.1(4) . . . . ?
B8 B7 B12 Br12 -112.1(4) . . . . ?
B3 B8 B12 B11 -1.0(5) . . . . ?
B9 B8 B12 B11 99.9(4) . . . . ?
B4 B8 B12 B11 62.7(5) . . . . ?
B7 B8 B12 B11 -37.9(4) . . . . ?
Br8 B8 B12 B11 -148.3(4) . . . . ?
B3 B8 B12 B7 36.9(4) . . . . ?
B9 B8 B12 B7 137.8(4) . . . . ?
B4 B8 B12 B7 100.6(4) . . . . ?
Br8 B8 B12 B7 -110.4(4) . . . . ?
B3 B8 B12 B10 -63.9(5) . . . . ?
B9 B8 B12 B10 36.9(3) . . . . ?
B4 B8 B12 B10 -0.2(5) . . . . ?
B7 B8 B12 B10 -100.8(4) . . . . ?
Br8 B8 B12 B10 148.8(3) . . . . ?
B3 B8 B12 B9 -100.8(4) . . . . ?
B4 B8 B12 B9 -37.2(3) . . . . ?
B7 B8 B12 B9 -137.8(4) . . . . ?
Br8 B8 B12 B9 111.9(4) . . . . ?
B3 B8 B12 Br12 147.9(4) . . . . ?
B9 B8 B12 Br12 -111.2(4) . . . . ?
B4 B8 B12 Br12 -148.4(3) . . . . ?
B7 B8 B12 Br12 111.0(4) . . . . ?
Br8 B8 B12 Br12 0.6(6) . . . . ?
B6 B10 B12 B11 -39.2(4) . . . . ?
B5 B10 B12 B11 -101.2(4) . . . . ?
B9 B10 B12 B11 -138.1(4) . . . . ?
B6 B10 B12 B7 -1.6(5) . . . . ?
B11 B10 B12 B7 37.6(4) . . . . ?
B5 B10 B12 B7 -63.6(5) . . . . ?
B9 B10 B12 B7 -100.5(4) . . . . ?
B6 B10 B12 B8 62.0(4) . . . . ?
B11 B10 B12 B8 101.2(4) . . . . ?
B5 B10 B12 B8 0.1(5) . . . . ?
B9 B10 B12 B8 -36.8(3) . . . . ?
B6 B10 B12 B9 98.9(4) . . . . ?
B11 B10 B12 B9 138.1(4) . . . . ?
B5 B10 B12 B9 36.9(3) . . . . ?
B6 B10 B12 Br12 -149.2(3) . . . . ?
B11 B10 B12 Br12 -110.0(4) . . . . ?
B5 B10 B12 Br12 148.8(3) . . . . ?
B9 B10 B12 Br12 111.9(4) . . . . ?
B5 B9 B12 B11 -0.3(5) . . . . ?
B4 B9 B12 B11 -63.9(4) . . . . ?
B8 B9 B12 B11 -101.4(4) . . . . ?
B10 B9 B12 B11 37.1(4) . . . . ?
Br9 B9 B12 B11 147.9(3) . . . . ?
B5 B9 B12 B7 63.4(5) . . . . ?
B4 B9 B12 B7 -0.3(5) . . . . ?
B8 B9 B12 B7 -37.8(3) . . . . ?
B10 B9 B12 B7 100.8(4) . . . . ?
Br9 B9 B12 B7 -148.5(3) . . . . ?
B5 B9 B12 B8 101.1(4) . . . . ?
B4 B9 B12 B8 37.5(3) . . . . ?
B10 B9 B12 B8 138.6(4) . . . . ?
Br9 B9 B12 B8 -110.7(4) . . . . ?
B5 B9 B12 B10 -37.4(4) . . . . ?
B4 B9 B12 B10 -101.0(4) . . . . ?
B8 B9 B12 B10 -138.6(4) . . . . ?
Br9 B9 B12 B10 110.8(4) . . . . ?
B5 B9 B12 Br12 -147.2(3) . . . . ?
B4 B9 B12 Br12 149.1(3) . . . . ?
B8 B9 B12 Br12 111.6(4) . . . . ?
B10 B9 B12 Br12 -109.8(4) . . . . ?
Br9 B9 B12 Br12 0.9(5) . . . . ?
 
_refine_diff_density_max    0.596
_refine_diff_density_min   -0.474
_refine_diff_density_rms    0.105

_shelxl_version_number 2014/6

_shelx_res_file
;
TITL siv75 in C2/c
CELL 0.71073  12.14530   8.47940  23.06320  90.0000  90.0886  90.0000
ZERR    8.00   0.00060   0.00050   0.00110   0.0000   0.0023   0.0000
LATT  7
SYMM -X, Y, 0.5-Z
SFAC C H B BR
UNIT 16 72 80 24
TEMP -153.000

ACTA
CONF
HTAB

L.S. 6
BOND $H
FMAP 2
PLAN 10

OMIT   0  0  2

WGHT    0.035000    0.245700
FVAR       0.04911
BR8   4    0.148501    0.442135    0.471226    11.00000    0.04890    0.03957 =
         0.03990   -0.00037    0.01529   -0.00712
BR9   4    0.093308    0.539250    0.310323    11.00000    0.03297    0.04385 =
         0.04331   -0.00621   -0.01130    0.00515
BR12  4    0.276035    0.179591    0.350146    11.00000    0.03733    0.02572 =
         0.04969   -0.00406    0.00147   -0.00268
C1    1    0.401814    0.755997    0.386209    11.00000    0.03333    0.03544 =
         0.05253   -0.00569    0.00393   -0.00861
AFIX 153
H1    2    0.430343    0.879769    0.394092    11.00000   -1.20000
AFIX   0
C2    1    0.483022    0.604569    0.403237    11.00000    0.04080    0.04660 =
         0.08594   -0.02155    0.01489   -0.00927
AFIX 153
H2    2    0.566955    0.622084    0.422362    11.00000   -1.20000
AFIX   0
B3    3    0.367300    0.645949    0.445386    11.00000    0.03261    0.03438 =
         0.04040   -0.00845   -0.00310    0.00070
AFIX 153
H3    2    0.370581    0.688127    0.491376    11.00000   -1.20000
AFIX   0
B4    3    0.266996    0.715804    0.395003    11.00000    0.02890    0.02716 =
         0.03402   -0.00296    0.00167   -0.00457
AFIX 153
H4    2    0.203317    0.804506    0.407998    11.00000   -1.20000
AFIX   0
B5    3    0.326865    0.718986    0.324976    11.00000    0.03879    0.02523 =
         0.04234    0.00300    0.00845   -0.00357
AFIX 153
H5    2    0.303852    0.809765    0.291829    11.00000   -1.20000
AFIX   0
B6    3    0.458653    0.646000    0.333833    11.00000    0.03039    0.03024 =
         0.05731   -0.01369    0.00841   -0.00593
AFIX 153
H6    2    0.525967    0.692193    0.305369    11.00000   -1.20000
AFIX   0
B7    3    0.403004    0.448853    0.425638    11.00000    0.03178    0.03988 =
         0.03620   -0.00285   -0.00551    0.00047
AFIX 153
H7    2    0.429360    0.360636    0.459031    11.00000   -1.20000
AFIX   0
B8    3    0.263794    0.516230    0.419290    11.00000    0.02393    0.03451 =
         0.03005    0.00193    0.00364   -0.00053
B9    3    0.238700    0.562540    0.345085    11.00000    0.02692    0.02404 =
         0.02941    0.00102   -0.00095   -0.00016
B10   3    0.361936    0.521723    0.305317    11.00000    0.03983    0.02951 =
         0.03561    0.00060    0.00706   -0.00478
AFIX 153
H10   2    0.360643    0.481392    0.259078    11.00000   -1.20000
AFIX   0
B11   3    0.462591    0.452515    0.354756    11.00000    0.02500    0.03626 =
         0.04868   -0.00768    0.00621   -0.00245
AFIX 153
H11   2    0.528252    0.367432    0.341240    11.00000   -1.20000
AFIX   0
B12   3    0.322800    0.395618    0.363996    11.00000    0.02921    0.02542 =
         0.03288   -0.00190    0.00076   -0.00215

HKLF 4

REM  siv75 in C2/c
REM R1 =  0.0347 for    1908 Fo > 4sig(Fo)  and  0.0464 for all    2349 data
REM    136 parameters refined using      0 restraints

END

WGHT      0.0350      0.2457

REM No hydrogen bonds found for HTAB generation

REM Highest difference peak  0.596,  deepest hole -0.474,  1-sigma level  0.105
Q1    1   0.0677  0.5786  0.3421  11.00000  0.05    0.60
Q2    1   0.1199  0.5104  0.4453  11.00000  0.05    0.57
Q3    1   0.2165  0.4717  0.4517  11.00000  0.05    0.53
Q4    1   0.1162  0.5986  0.2813  11.00000  0.05    0.43
Q5    1   0.2712  0.2469  0.3176  11.00000  0.05    0.43
Q6    1   0.0872  0.4499  0.2885  11.00000  0.05    0.42
Q7    1   0.1708  0.5622  0.3278  11.00000  0.05    0.42
Q8    1   0.2597  0.2468  0.3810  11.00000  0.05    0.42
Q9    1   0.4122  0.6988  0.3445  11.00000  0.05    0.40
Q10   1   0.2164  0.1865  0.3708  11.00000  0.05    0.38
;
_shelx_res_checksum   94052

_shelx_hkl_file
;
   2   0   0  129.04    4.70
  -2   0   0  140.57    4.72
  -2   0   0  132.82    5.25
   2   0   0  140.16    5.29
   4   0   0   48.41    2.00
   4   0   0   47.68    2.83
  -4   0   0   52.56    2.05
  -4   0   0   48.79    2.83
   6   0   0   51.16    3.36
  -6   0   0   55.79    3.40
  -6   0   0   53.18    2.29
   6   0   0   52.79    2.41
  -8   0   0   26.03    1.43
   8   0   0   25.68    1.35
   8   0   0   28.85    2.55
  10   0   0    0.06    0.26
  10   0   0   -0.23    0.18
  10   0   0    0.28    0.73
  12   0   0    4.20    1.38
  12   0   0    5.71    0.75
  12   0   0    4.20    0.57
  14   0   0    1.25    0.90
   1  -1   0   97.03    3.81
   1  -1   0   92.78    3.38
  -1  -1   0   96.05    3.99
   1   1   0   91.79    3.55
   1   1   0   98.90    4.06
  -1   1   0   92.16    3.39
  -1   1   0   97.45    3.83
  -3  -1   0  177.93    6.79
  -3  -1   0  183.38    7.58
   3  -1   0  200.31    7.45
   3   1   0  187.74    7.63
  -3   1   0  186.49    7.37
   5  -1   0   50.73    3.11
  -5  -1   0   51.67    2.41
  -5  -1   0   50.14    3.23
   5   1   0   55.82    2.43
  -5   1   0   53.03    3.14
   5   1   0   50.55    3.28
  -7  -1   0    3.74    0.65
   7  -1   0    5.45    1.30
  -7  -1   0    3.81    1.21
  -7   1   0    2.59    0.87
   7   1   0    3.28    0.63
   7   1   0    3.90    1.22
   9  -1   0   12.82    2.20
  -9  -1   0    9.92    0.97
   9   1   0   12.38    2.25
   9   1   0    9.20    0.86
 -11  -1   0    1.07    0.42
  11  -1   0    0.53    0.76
  11   1   0    0.04    0.28
  11   1   0    1.58    0.88
  13  -1   0   17.06    2.74
  13   1   0   19.71    3.15
  13   1   0   15.97    1.26
  13   1   0   13.24    1.09
   0  -2   0  161.59    6.11
   0   2   0  165.82    6.11
   0   2   0  166.28    6.65
   0   2   0  165.49    6.75
   2  -2   0   69.09    2.83
  -2  -2   0   74.75    3.19
  -2  -2   0   73.33    3.85
  -2   2   0   76.55    3.64
   2   2   0   73.99    3.17
  -2   2   0   70.78    2.86
   2   2   0   75.94    3.98
   4  -2   0  243.54    8.22
   4  -2   0  256.80    9.71
  -4  -2   0  235.47    9.92
  -4  -2   0  234.04    8.92
  -4   2   0  260.21    9.78
   4   2   0  224.46    9.97
  -4   2   0  226.92    8.30
   4   2   0  241.90    8.92
  -6  -2   0    0.28    0.56
   6  -2   0    0.61    0.51
  -6  -2   0    0.60    0.35
  -6   2   0    0.78    0.52
   6   2   0   -0.48    0.37
  -8  -2   0    2.10    0.54
   8  -2   0    1.11    0.83
   8   2   0    2.68    1.09
   8   2   0    2.09    0.52
 -10  -2   0   -0.28    0.29
  10  -2   0   -0.83    0.46
  10   2   0   -0.15    0.27
  10   2   0   -0.46    0.55
 -12  -2   0   12.89    1.19
  12  -2   0   11.74    2.23
  12   2   0    8.50    0.93
  12   2   0   10.27    2.15
  14  -2   0   -0.47    0.73
  14   2   0    0.43    1.01
   1  -3   0   74.22    3.25
  -1  -3   0   72.46    4.08
  -1  -3   0   72.16    3.38
   1  -3   0   76.86    4.03
   1   3   0   80.48    3.47
  -1   3   0   76.30    4.00
  -1   3   0   77.77    3.30
   1   3   0   74.64    4.18
  -3  -3   0    0.49    0.36
   3  -3   0    0.13    0.16
   3  -3   0    0.42    0.56
  -3  -3   0    0.37    0.40
   3   3   0    0.09    0.66
   3   3   0   -0.08    0.14
  -3   3   0    0.56    0.24
  -3   3   0   -0.24    0.32
  -5  -3   0  107.97    6.46
  -5  -3   0  108.18    4.82
   5  -3   0  106.33    5.46
   5  -3   0  113.22    4.05
  -5   3   0  107.39    5.51
  -5   3   0  111.02    4.16
   5   3   0  100.43    5.94
   5   3   0  121.78    4.93
  -7  -3   0   29.81    2.03
   7  -3   0   29.50    2.60
   7   3   0   34.09    2.09
   7   3   0   28.24    2.87
  -9  -3   0   18.59    1.60
   9  -3   0   14.88    2.34
   9   3   0   18.91    2.95
  11  -3   0   26.08    2.64
 -11  -3   0   26.64    1.97
  11   3   0   29.28    3.02
 -13  -3   0    1.11    0.50
  13   3   0    1.26    1.09
   0  -4   0   21.79    1.57
   0   4   0   20.72    1.97
   0   4   0   21.68    2.24
   0   4   0   22.52    1.55
   2  -4   0    1.16    0.43
  -2  -4   0    0.42    0.42
   2  -4   0    1.43    0.75
  -2  -4   0    0.95    0.58
   2   4   0    1.15    0.86
  -2   4   0    0.70    0.34
   2   4   0    2.07    0.65
  -2   4   0    0.93    0.55
  -4  -4   0   27.71    2.59
  -4  -4   0   31.07    2.08
   4  -4   0   26.73    2.44
   4  -4   0   28.30    1.55
   4   4   0   29.71    1.98
  -4   4   0   27.85    2.33
   4   4   0   27.26    2.82
  -4   4   0   27.46    1.56
   6  -4   0   18.84    1.13
  -6  -4   0   17.22    1.56
   6  -4   0   14.94    2.18
   6   4   0   18.88    2.95
   6   4   0   18.67    1.94
  -6   4   0   16.62    1.06
  -8  -4   0    0.11    0.41
   8  -4   0    0.10    0.55
   8   4   0    0.93    0.90
  10  -4   0    2.38    1.19
 -10  -4   0    2.24    0.74
  10   4   0    1.91    1.26
  12  -4   0    4.08    1.38
 -12  -4   0    3.81    0.92
  12   4   0    4.31    1.53
  -1  -5   0    4.04    0.91
   1  -5   0    4.41    0.85
   1   5   0    7.72    1.66
   1   5   0    7.08    1.80
  -1   5   0    4.92    1.34
   1   5   0    6.46    1.01
  -1   5   0    5.66    0.92
  -1   5   0    6.09    1.39
   3  -5   0    0.37    0.29
  -3  -5   0   -0.08    0.47
   3  -5   0   -0.16    0.61
  -3  -5   0    0.09    0.34
  -3   5   0    0.49    0.25
   3   5   0    0.72    0.94
   5  -5   0    2.88    0.60
   5  -5   0    2.34    1.06
   5   5   0    2.51    1.50
  -5   5   0    3.53    0.63
   7  -5   0   30.31    2.80
  -7  -5   0   28.19    2.17
   7  -5   0   28.62    1.40
   7   5   0   24.87    3.50
  -7   5   0   28.30    1.55
   9  -5   0   13.64    2.36
  -9  -5   0   18.79    1.71
   9   5   0   14.52    2.81
  11  -5   0   -0.29    0.70
 -11  -5   0   -0.07    0.40
  11   5   0    0.73    0.86
  13  -5   0    0.98    0.96
 -13  -5   0    1.71    0.58
  13   5   0    0.63    1.01
   0  -6   0    6.63    1.19
  -2  -6   0   13.87    1.51
   2  -6   0   16.12    1.41
  -2   6   0   16.85    2.69
   2   6   0   11.42    2.22
  -2   6   0   15.96    1.42
   4  -6   0   32.94    3.02
   4  -6   0   35.17    2.08
  -4  -6   0   34.64    2.46
   4   6   0   32.59    3.38
  -4   6   0   34.76    2.10
  -6  -6   0   24.86    2.04
   6  -6   0   22.90    2.46
   6  -6   0   23.08    1.44
  -6   6   0   22.23    1.47
   6   6   0   24.02    3.59
   8  -6   0   -0.40    0.57
  -8  -6   0    0.00    0.47
   8  -6   0    0.47    0.23
  -8   6   0    0.58    0.33
   8   6   0   -0.28    1.00
  10  -6   0    1.46    0.84
 -10  -6   0    1.44    0.65
  10   6   0    1.59    1.08
  12  -6   0    1.83    1.19
 -12  -6   0    3.87    1.01
  12   6   0    1.41    1.08
  -1  -7   0    9.26    1.50
   1  -7   0   11.69    1.60
   1   7   0   11.42    2.47
  -1   7   0    5.42    1.64
  -3  -7   0   13.99    1.51
   3  -7   0   14.01    1.32
  -3   7   0    9.53    2.09
   3   7   0   11.53    2.53
   5  -7   0    0.41    0.41
  -5  -7   0    0.34    0.53
   5  -7   0    0.36    0.69
   5   7   0    0.02    0.83
  -5   7   0    0.74    0.38
  -7  -7   0    9.36    1.60
   7  -7   0    6.59    0.88
   7  -7   0    4.34    1.56
  -7   7   0    8.10    1.50
   7   7   0    5.62    1.92
   9  -7   0    0.37    0.63
  -9  -7   0   -0.24    0.35
   9   7   0    0.59    1.18
 -11  -7   0    2.04    0.75
  11  -7   0    4.10    1.47
  11   7   0    1.45    1.14
   0  -8   0   83.76    4.19
   0   8   0   68.50    5.19
  -2  -8   0   20.12    1.93
   2  -8   0   24.17    1.86
   2   8   0   19.40    3.10
  -2   8   0   24.96    3.54
  -4  -8   0    0.23    0.55
   4  -8   0   -0.04    0.37
  -4   8   0   -0.28    0.73
   4   8   0    0.04    0.89
  -6  -8   0    1.14    0.74
   6  -8   0    1.95    1.27
   6   8   0    0.03    1.02
  -8  -8   0    1.68    0.75
   8  -8   0    2.13    0.51
   8  -8   0    2.27    1.16
  -8   8   0    3.32    0.63
   8   8   0    3.65    1.53
  -1  -9   0   13.97    1.81
   1  -9   0   13.75    1.82
  -1   9   0    8.07    2.28
   1   9   0   13.72    2.68
  -3  -9   0   26.40    2.19
   3  -9   0   22.18    1.82
   3   9   0   24.53    3.68
  -3   9   0   18.81    3.02
  -5  -9   0    2.00    0.77
   5  -9   0    2.04    0.63
   5   9   0    0.58    0.69
  -5   9   0    0.84    1.13
  -7  -9   0    0.70    0.62
   7  -9   0    0.27    0.41
   7   9   0    1.04    1.10
   0  10   0    6.40    1.69
   2 -10   0    1.72    0.65
  -2 -10   0    3.99    1.09
   2  10   0    1.33    1.04
  -2  10   0    3.11    1.45
  -4 -10   0   11.50    1.71
   4 -10   0   11.94    1.58
   4  10   0   11.56    2.62
  -4  10   0    9.80    2.13
  14   0  -1   -0.30    0.77
  12   0  -1   -0.03    0.28
  12   0  -1    0.29    0.64
  12   0  -1    0.05    0.21
  10   0  -1    0.10    0.67
  10   0  -1    0.09    0.22
   8   0  -1   -0.08    0.18
   8   0  -1    0.04    0.65
  -8   0   1    0.15    0.20
   6   0  -1    0.16    0.19
  -6   0   1   -0.24    0.20
  -6   0   1   -0.05    0.39
   6   0  -1   -0.03    0.54
   4   0  -1   -0.04    0.15
  -4   0   1   -0.10    0.15
  -4   0   1    0.27    0.40
   4   0  -1   -0.31    0.37
  -2   0   1    0.49    0.14
   2   0  -1    0.25    0.30
   2   0  -1    0.07    0.11
  -2   0   1   -0.09    0.26
   2   0   1    0.13    0.11
  -2   0  -1    0.00    0.12
   2   0   1   -0.01    0.25
  -2   0  -1    0.12    0.21
  -4   0  -1   -0.27    0.26
   4   0   1    0.05    0.15
  -4   0  -1   -0.03    0.16
   4   0   1    0.13    0.35
  -6   0  -1    0.15    0.18
   6   0   1    0.09    0.16
  -6   0  -1    0.46    0.41
   6   0   1    0.44    0.39
   8   0   1    0.96    0.76
  10   0   1   -0.22    0.18
  10   0   1    0.33    0.34
  10   0   1   -0.62    0.21
  12   0   1    0.42    0.35
  12   0   1    0.08    0.19
  12   0   1   -0.64    0.69
  14   0   1    0.47    0.84
  13  -1  -1   11.39    2.18
  13   1  -1   12.00    2.20
  13   1  -1   11.44    1.05
  13   1  -1   11.52    0.91
 -11  -1   1    1.89    0.52
  11  -1  -1    0.88    0.95
  11   1  -1    0.93    0.36
  11   1  -1   -0.03    0.71
  -9  -1   1   12.51    1.04
   9  -1  -1   11.26    1.99
   9   1  -1    9.99    1.85
   9   1  -1   12.12    0.98
  -7  -1   1   40.03    3.10
  -7  -1   1   41.12    2.12
   7  -1  -1   42.15    3.07
   7   1  -1   46.90    3.31
  -7   1   1   44.86    3.09
   7   1  -1   41.78    2.11
  -5  -1   1   12.83    1.87
   5  -1  -1   11.37    1.62
  -5  -1   1    9.04    0.83
   5   1  -1   12.15    0.88
   5   1  -1   13.77    2.06
  -5   1   1   13.45    1.78
   3  -1  -1    4.21    0.78
  -3  -1   1    4.16    0.55
  -3  -1   1    4.15    0.98
  -3   1   1    8.00    1.14
   3   1  -1    4.58    1.03
  -1  -1   1   35.51    1.96
   1  -1  -1   34.33    1.39
  -1  -1   1   34.90    1.57
   1  -1  -1   36.52    1.79
   1   1  -1   34.17    1.56
  -1   1   1   37.52    1.80
   1   1  -1   37.27    2.01
  -1   1   1   33.15    1.39
  -1  -1  -1   30.30    1.70
   1  -1   1   33.80    1.67
   1  -1   1   29.98    1.32
  -1  -1  -1   31.75    1.44
   1   1   1   30.93    1.43
  -1   1  -1   30.50    1.32
  -1   1  -1   30.20    1.61
   1   1   1   33.20    1.82
  -3  -1  -1   82.47    3.44
   3  -1   1   86.81    3.13
  -3  -1  -1   84.58    4.05
   3  -1   1   93.35    3.97
   3   1   1   87.13    4.11
  -3   1  -1   74.21    3.10
  -3   1  -1   90.07    3.93
   5  -1   1    5.51    1.10
  -5  -1  -1    6.71    0.88
   5  -1   1    5.38    0.40
  -5  -1  -1    5.65    1.20
   5  -1   1    5.28    0.49
   5   1   1    5.36    1.21
   5   1   1    6.70    0.84
  -5   1  -1    6.76    1.24
   7  -1   1   33.30    1.40
  -7  -1  -1   33.22    1.87
  -7  -1  -1   32.48    2.67
   7  -1   1   30.81    1.53
   7  -1   1   32.59    2.62
  -7   1  -1   29.12    2.44
   7   1   1   35.84    1.86
   7   1   1   32.86    2.69
  -9  -1  -1   39.15    2.12
   9  -1   1   36.25    3.05
   9   1   1   38.69    3.20
   9   1   1   37.98    2.01
  11  -1   1    6.78    1.70
  11   1   1    5.97    1.74
  11   1   1    7.02    0.75
  13  -1   1    0.56    0.90
  13   1   1   -0.44    0.27
  13   1   1    1.69    1.00
  13   1   1    0.01    0.33
  14  -2  -1    0.76    0.87
  14   2  -1    0.67    1.10
  12  -2  -1   17.18    2.75
 -12  -2   1   15.97    1.33
  12   2  -1   15.64    1.27
  12   2  -1   11.78    2.36
  10  -2  -1    2.55    1.02
 -10  -2   1    2.41    0.70
  10   2  -1    4.88    1.50
  10   2  -1    2.81    0.61
  -8  -2   1    0.66    0.40
   8  -2  -1    0.79    0.67
   8   2  -1    0.32    0.75
   8   2  -1    0.91    0.32
   6  -2  -1   52.79    3.40
  -6  -2   1   54.41    2.66
  -6  -2   1   49.99    3.49
  -6   2   1   51.06    3.30
   6   2  -1   45.89    3.50
   4  -2  -1  135.55    6.05
  -4  -2   1  141.64    6.46
  -4  -2   1  128.71    5.36
   4   2  -1  138.32    5.41
   4   2  -1  123.06    6.33
  -4   2   1  142.30    6.12
   2  -2  -1  121.90    4.64
   2  -2  -1  131.26    5.50
  -2  -2   1  129.78    5.83
  -2  -2   1  127.02    5.04
  -2   2   1  136.23    5.55
   2   2  -1  131.96    5.04
  -2   2   1  120.72    4.66
   2   2  -1  126.08    5.86
   0  -2  -1  184.00    6.80
   0   2  -1  182.56    6.81
   0   2   1  184.42    7.78
   0   2   1  182.40    6.78
   0   2   1  186.67    7.31
   0   2  -1  191.84    7.44
   2  -2   1    8.80    1.26
  -2  -2  -1    8.42    1.31
   2  -2   1    9.27    0.70
  -2  -2  -1    7.52    0.81
   2   2   1    9.70    0.84
  -2   2  -1    9.62    1.33
   2   2   1   11.15    1.69
  -2   2  -1    9.20    0.69
  -4  -2  -1   10.63    1.03
   4  -2   1   11.76    0.69
   4  -2   1   11.94    1.35
  -4  -2  -1   13.02    1.83
   4   2   1   11.13    1.02
   4   2   1   12.04    1.87
  -4   2  -1   13.99    0.82
  -4   2  -1   13.14    1.38
  -6  -2  -1   39.13    2.21
   6  -2   1   40.22    2.84
   6   2   1   37.53    3.01
  -6   2  -1   40.72    2.88
   8  -2   1   19.05    2.01
  -8  -2  -1   16.24    1.34
   8   2   1   16.01    1.26
   8   2   1   12.49    2.21
 -10  -2  -1   32.13    2.07
  10  -2   1   33.32    2.90
  10   2   1   31.55    3.02
  10   2   1   30.67    1.92
 -12  -2  -1   15.38    1.36
  12  -2   1   12.43    2.25
  12   2   1   19.16    2.91
  14  -2   1    2.33    1.23
  14   2   1    2.54    0.88
  14   2   1    2.74    1.22
  13  -3  -1    1.37    1.06
 -13  -3   1   -0.07    0.35
  11  -3  -1   38.70    3.27
  11   3  -1   33.87    3.31
  -9  -3   1    3.76    0.85
   9  -3  -1    4.36    1.37
   9   3  -1    2.93    1.28
   9   3  -1    3.71    0.90
   7  -3  -1   30.43    2.67
  -7  -3   1   33.35    2.11
   7   3  -1   26.99    2.84
   7   3  -1   30.34    1.96
  -5  -3   1    4.55    1.13
   5  -3  -1    5.56    0.47
   5  -3  -1    7.26    1.45
  -5  -3   1    6.58    1.07
   5   3  -1    7.37    1.07
  -5   3   1    7.00    0.51
   5   3  -1    8.28    1.81
  -5   3   1   10.02    1.69
   3  -3  -1   14.28    1.58
  -3  -3   1   12.20    1.17
  -3  -3   1   17.54    2.40
   3   3  -1   13.99    1.18
  -3   3   1   12.77    0.91
   3   3  -1   16.14    2.31
  -3   3   1   13.58    1.50
   1  -3  -1    0.59    0.50
   1  -3  -1    0.32    0.29
  -1  -3   1   -0.15    0.49
  -1  -3   1    0.26    0.26
   1   3  -1    0.67    0.65
  -1   3   1    0.12    0.35
  -1   3   1    0.24    0.23
   1   3  -1    0.76    0.35
   1  -3   1  124.66    5.04
   1  -3   1  138.19    5.99
  -1  -3  -1  133.28    6.00
  -1  -3  -1  125.52    5.19
   1   3   1  126.23    5.21
  -1   3  -1  130.90    5.88
  -1   3  -1  130.19    5.10
   1   3   1  117.21    5.97
   3  -3   1    3.89    0.61
  -3  -3  -1    4.80    1.15
   3  -3   1    4.97    1.11
  -3  -3  -1    5.09    0.96
   3   3   1    2.60    1.06
   3   3   1    5.48    0.89
  -3   3  -1    3.93    0.62
   5  -3   1  196.51    8.32
   5  -3   1  184.88    6.71
  -5  -3  -1  190.53    7.53
   5   3   1  189.24    7.48
  -5   3  -1  191.68    6.90
   5   3   1  178.24    8.74
  -5   3  -1  188.97    8.38
   7  -3   1    0.45    0.50
  -7  -3  -1   -0.40    0.25
   7   3   1   -0.02    0.59
   7   3   1    0.09    0.27
   9  -3   1   18.15    2.58
  -9  -3  -1   17.34    1.53
   9   3   1   13.64    2.46
 -11  -3  -1    3.27    0.88
  11  -3   1    1.59    0.89
  11   3   1    4.33    1.40
  13  -3   1    2.05    1.67
 -13  -3  -1    2.42    0.71
  13   3   1    2.11    1.14
 -12  -4   1   17.38    1.55
  12  -4  -1   13.66    2.48
  12   4  -1   10.65    2.21
 -10  -4   1   23.81    1.90
  10  -4  -1   22.91    2.50
  10   4  -1   21.68    3.39
   8  -4  -1   78.29    4.80
   8   4  -1   77.54    5.35
   6  -4  -1   11.82    0.76
   6  -4  -1   13.60    2.14
  -6  -4   1   12.14    1.57
   6   4  -1   16.38    1.59
   6   4  -1   12.51    2.48
   4  -4  -1   19.96    2.09
  -4  -4   1   20.88    1.73
   4  -4  -1   23.51    1.34
  -4  -4   1   22.41    2.34
  -4   4   1   24.59    2.19
   4   4  -1   21.76    2.52
   4   4  -1   23.02    1.72
  -4   4   1   23.80    1.39
  -2  -4   1   48.01    3.37
   2  -4  -1   41.83    3.00
   2  -4  -1   37.68    2.11
   2   4  -1   44.59    3.37
   2   4  -1   42.03    2.41
  -2   4   1   36.12    2.74
  -2   4   1   42.15    2.19
   0  -4   1   11.86    1.12
   0  -4  -1   10.67    1.08
   0   4   1   11.37    1.78
   0   4  -1   14.14    2.07
   0   4   1   10.91    1.80
   0   4  -1   12.90    2.16
   0   4   1   10.96    1.05
   0   4  -1   11.77    1.12
  -2  -4  -1  105.72    4.72
  -2  -4  -1  108.77    5.64
   2  -4   1  106.49    4.46
   2  -4   1  103.22    5.43
  -2   4  -1  108.47    4.52
  -2   4  -1   97.57    5.27
   2   4   1  110.89    4.77
   2   4   1  109.33    5.88
   4  -4   1  101.83    4.15
  -4  -4  -1  107.28    4.77
   4  -4   1  106.47    5.48
  -4  -4  -1  101.00    5.63
  -4   4  -1   98.90    4.18
   4   4   1  103.30    5.99
   4   4   1   99.30    4.65
  -4   4  -1  107.90    5.42
  -6  -4  -1   81.47    3.89
   6  -4   1   77.51    3.01
   6  -4   1   76.06    4.48
  -6   4  -1   71.19    3.16
   6   4   1   66.52    4.87
  -8  -4  -1   68.57    3.59
   8  -4   1   59.16    4.12
   8   4   1   64.99    4.72
  10  -4   1    2.35    1.18
 -10  -4  -1    3.00    0.87
  10   4   1    2.68    1.31
  12  -4   1    2.58    1.12
 -12  -4  -1    3.54    0.95
  12   4   1    1.17    0.90
  13  -5  -1    1.18    0.93
 -13  -5   1    0.28    0.47
  13   5  -1    0.83    1.04
  11  -5  -1   28.12    2.81
 -11  -5   1   27.11    2.13
  11   5  -1   19.66    3.16
   9  -5  -1   17.68    2.64
  -9  -5   1   16.21    1.63
   9   5  -1   12.91    2.63
  -7  -5   1   25.19    1.98
   7  -5  -1   22.47    1.15
   7  -5  -1   22.03    2.41
   7   5  -1   24.07    3.47
  -7   5   1   19.23    1.19
   5  -5  -1    0.84    0.33
   5  -5  -1   -0.36    0.53
  -5  -5   1    0.13    0.54
  -5   5   1    0.24    0.25
   5   5  -1    0.02    0.90
   3  -5  -1    0.12    0.49
  -3  -5   1    0.50    0.43
   3  -5  -1    0.37    0.20
   3   5  -1    0.79    0.80
  -3   5   1    0.69    0.36
   1  -5  -1   13.19    1.24
  -1  -5   1   12.54    1.29
  -1   5   1   11.69    2.04
  -1   5   1   17.23    2.38
  -1   5   1   14.02    1.21
   1   5  -1    8.63    1.64
   1   5  -1   12.24    1.27
   1   5  -1   10.60    2.06
  -1  -5  -1   26.73    1.94
   1  -5   1   27.72    1.89
  -1   5  -1   28.06    2.66
  -1   5  -1   25.53    2.44
   1   5   1   30.35    2.53
  -1   5  -1   32.35    2.29
   1   5   1   26.40    2.76
   1   5   1   28.27    1.96
  -3  -5  -1   38.67    2.52
  -3  -5  -1   41.07    3.31
   3  -5   1   38.29    3.11
   3  -5   1   36.43    2.18
  -3   5  -1   43.23    2.30
   3   5   1   47.33    3.76
   5  -5   1  183.66    8.61
   5  -5   1  193.86    7.00
  -5  -5  -1  180.35    8.22
  -5   5  -1  179.09    7.04
  -7  -5  -1    6.90    1.32
   7  -5   1    7.96    1.61
   7  -5   1    8.51    0.68
   7   5   1    4.94    1.55
  -7   5  -1    8.32    0.99
   9  -5   1   14.19    2.30
  -9  -5  -1   16.81    1.68
   9   5   1   17.58    3.16
  11  -5   1    3.18    1.28
 -11  -5  -1    4.34    1.00
  11   5   1    4.51    1.66
  13  -5   1    6.63    1.73
 -13  -5  -1    5.99    1.13
  13   5   1    3.28    1.39
 -12  -6   1   23.51    2.01
  12  -6  -1   24.45    2.77
  12   6  -1   18.39    3.13
  10  -6  -1    1.81    0.81
 -10  -6   1    0.86    0.56
  10   6  -1    1.70    1.22
   8  -6  -1    4.26    0.55
  -8  -6   1    3.96    1.00
   8  -6  -1    3.06    1.22
   8   6  -1    6.09    1.79
  -8   6   1    3.87    0.63
   6  -6  -1   21.56    1.38
   6  -6  -1   22.30    2.44
  -6  -6   1   23.86    1.98
   6   6  -1   23.02    3.49
  -6   6   1   21.90    1.40
   4  -6  -1   21.98    2.46
  -4  -6   1   23.91    1.98
   4  -6  -1   22.64    1.56
   4   6  -1   25.70    3.58
  -4   6   1   16.81    1.65
   2  -6  -1   25.08    1.77
  -2  -6   1   23.03    1.92
  -2   6   1   20.96    3.00
   2   6  -1   24.00    2.72
  -2   6   1   22.75    1.73
   0  -6   1   55.68    3.07
   0  -6  -1   52.75    3.00
   0   6  -1   50.98    4.51
  -2  -6  -1    0.79    0.48
   2  -6   1    0.09    0.34
  -2   6  -1    0.60    0.65
  -2   6  -1    0.16    0.39
   2   6   1    0.77    0.91
  -4  -6  -1   39.87    2.66
   4  -6   1   40.00    3.30
   4  -6   1   40.46    2.28
  -4   6  -1   39.04    2.25
   4   6   1   38.76    3.58
  -6  -6  -1   28.94    2.24
   6  -6   1   31.71    1.74
   6  -6   1   28.56    2.81
   6   6   1   30.11    3.25
  -6   6  -1   27.66    1.73
   8  -6   1    6.47    0.61
   8  -6   1    6.67    1.68
  -8  -6  -1    8.68    1.50
   8   6   1    7.31    1.89
  -8   6  -1    7.60    0.79
  10  -6   1   16.33    2.55
 -10  -6  -1   15.23    1.67
  10   6   1   12.58    2.66
  12  -6   1    1.48    0.93
 -12  -6  -1    0.05    0.52
  12   6   1    0.35    0.84
 -11  -7   1   -0.21    0.42
  11  -7  -1    0.06    0.62
  11   7  -1    0.52    0.84
  -9  -7   1    5.06    1.06
   9  -7  -1    4.94    2.32
   9   7  -1    3.27    1.51
   7  -7  -1   27.73    2.86
   7  -7  -1   27.39    1.58
  -7  -7   1   29.11    2.32
   7   7  -1   22.01    3.48
  -7   7   1   26.30    1.63
   5  -7  -1   -0.43    0.72
   5  -7  -1    0.17    0.38
  -5  -7   1   -0.32    0.44
  -5   7   1    0.27    0.29
   5   7  -1   -0.09    1.06
  -3  -7   1    1.88    0.75
   3  -7  -1   -0.18    0.31
  -3   7   1    0.55    0.74
   3   7  -1    0.91    1.00
  -1  -7   1    0.24    0.36
   1  -7  -1    0.35    0.46
   1   7  -1    1.04    0.97
  -1   7   1    0.21    0.79
  -1  -7  -1   68.37    3.68
   1  -7   1   64.31    3.50
   1   7   1   65.21    4.77
  -3  -7  -1   14.58    1.57
   3  -7   1   14.74    1.43
  -3   7  -1   12.92    2.52
   3   7   1   16.46    2.80
   5  -7   1    0.86    0.49
  -5  -7  -1    0.35    0.52
   5  -7   1    0.85    0.75
  -5   7  -1   -0.15    0.32
   5   7   1    0.80    0.91
   7  -7   1   27.42    1.56
   7  -7   1   21.46    2.51
  -7  -7  -1   23.12    2.10
  -7   7  -1   24.24    1.67
   7   7   1   21.98    3.58
   9  -7   1   39.37    3.51
   9  -7   1   37.03    1.66
  -9  -7  -1   36.25    2.63
  -9   7  -1   32.93    1.88
  11  -7   1    0.32    0.95
 -11  -7  -1    0.02    0.47
  11   7   1    0.09    0.76
   8  -8  -1    1.17    0.92
  -8  -8   1    1.49    0.73
   8  -8  -1    0.36    0.38
   8   8  -1    2.07    1.26
  -6  -8   1    7.19    1.31
   6  -8  -1    6.08    0.93
   6  -8  -1    8.54    2.04
   6   8  -1   10.16    2.34
   4  -8  -1    1.06    0.51
  -4  -8   1    0.53    0.57
   4   8  -1   -0.24    0.71
  -4   8   1    1.22    1.29
   2  -8  -1   -0.02    0.41
  -2  -8   1    0.15    0.53
  -2   8   1    1.05    0.99
   2   8  -1   -0.28    0.71
   0  -8   1   17.05    1.73
   0  -8  -1   17.55    1.70
   0   8  -1   19.92    3.32
   0   8   1   15.87    2.66
   2  -8   1    0.60    0.41
  -2  -8  -1    0.03    0.35
   2   8   1    0.80    1.05
  -2   8  -1    1.17    1.12
   4  -8   1    9.53    1.31
  -4  -8  -1    7.65    1.34
  -4   8  -1   15.40    2.96
   4   8   1    9.43    2.30
   6  -8   1    4.99    0.99
   6  -8   1    8.26    2.00
  -6  -8  -1    6.87    1.45
   6   8   1    8.21    2.14
   8  -8   1   -0.62    0.27
  -8  -8  -1    0.35    0.58
   8  -8   1    0.18    0.80
   8   8   1    0.81    0.94
  -8   8  -1   -0.65    0.31
  -7  -9   1   -0.10    0.53
   7  -9  -1    0.17    0.37
   7   9  -1    0.59    0.91
   5  -9  -1    4.87    0.93
  -5  -9   1    4.84    1.22
  -5   9   1    3.04    1.41
   5   9  -1    3.10    1.41
   3  -9  -1    0.19    0.41
  -3  -9   1    0.69    0.56
  -3   9   1   -0.06    0.93
   3   9  -1   -0.10    0.81
   1  -9  -1   13.51    1.41
  -1  -9   1   11.32    1.71
   1   9  -1   10.30    2.40
  -1   9   1   11.72    2.51
   1  -9   1    4.52    1.06
  -1  -9  -1    3.95    1.01
  -1   9  -1    2.97    1.38
   1   9   1    2.40    1.11
   3  -9   1    2.04    0.73
  -3  -9  -1    1.52    0.68
   3   9   1    1.33    1.11
  -3   9  -1    1.56    1.03
   5  -9   1    7.98    1.17
  -5  -9  -1    9.44    1.56
  -5   9  -1   11.96    2.46
   5   9   1    6.83    2.23
  -7  -9  -1    0.53    0.59
   7  -9   1    1.07    0.46
   7   9   1    1.40    1.14
   4 -10  -1   13.16    1.40
  -4 -10   1   11.42    1.68
   4  10  -1   13.36    2.67
  -4  10   1   10.63    2.46
  -2 -10   1   17.18    1.79
   2 -10  -1   18.43    1.68
   2  10  -1   13.55    2.81
  -2  10   1   17.19    3.06
   0 -10   1    1.00    1.17
   0  10  -1    1.73    1.13
   0  10   1    0.72    1.05
  -2 -10  -1    1.00    0.56
   2  10   1    2.13    1.36
  -2  10  -1    0.37    1.11
   4 -10   1    3.59    0.83
  -4 -10  -1    2.09    0.66
  -4  10  -1    3.53    1.49
   4  10   1    2.02    1.16
  14   0  -2    4.37    1.28
  12   0  -2   18.32    2.98
 -10   0   2    0.04    0.18
  10   0  -2    0.89    0.73
  10   0  -2    0.51    0.26
  -8   0   2   -0.16    0.20
   8   0  -2    0.09    0.21
   8   0  -2   -0.28    0.59
  -6   0   2  484.92   17.22
   6   0  -2  526.28   17.26
   6   0  -2  495.11   18.93
  -6   0   2  507.85   18.92
  -4   0   2  192.70    7.95
   4   0  -2  196.78    6.84
  -4   0   2  192.12    6.81
   4   0  -2  191.33    7.92
  -2   0   2    4.29    0.70
   2   0  -2    4.93    0.79
   2   0  -2    3.86    0.37
  -2   0   2    4.19    0.36
   0   0   2   -0.02    0.07
   2   0   2   24.51    1.37
   2   0   2   22.13    1.19
   2   0   2   22.69    1.13
   4   0   2   11.14    0.77
  -4   0  -2    9.97    1.15
   4   0   2   10.83    1.20
   6   0   2    0.47    0.59
  -6   0  -2    0.61    0.47
   6   0   2    0.80    0.34
   6   0   2    0.38    0.24
   8   0   2   23.07    1.33
  -8   0  -2   25.40    2.55
   8   0   2   25.55    2.38
   8   0   2   23.38    1.46
  10   0   2  167.75    6.29
  10   0   2  164.11    8.14
  10   0   2  172.28    6.53
  12   0   2    5.08    0.82
  12   0   2    6.36    1.69
  12   0   2    4.62    0.64
  14   0   2    2.79    1.26
  13  -1  -2    7.15    1.90
  13   1  -2    4.64    1.57
  13   1  -2    5.63    0.73
  11  -1  -2   17.98    2.73
 -11  -1   2   13.92    1.11
  11   1  -2   17.27    2.82
  11   1  -2   15.62    1.13
  -9  -1   2   28.74    1.69
   9  -1  -2   25.88    2.65
   9   1  -2   29.54    2.83
   9   1  -2   32.85    1.74
  -7  -1   2  156.68    5.78
   7  -1  -2  141.28    6.95
  -7  -1   2  145.44    7.18
  -7   1   2  145.54    6.97
   7   1  -2  148.46    5.72
   7   1  -2  146.11    7.21
   5  -1  -2   62.70    3.53
  -5  -1   2   63.18    3.67
  -5  -1   2   59.06    2.66
   5   1  -2   60.18    2.64
   5   1  -2   53.13    3.53
  -5   1   2   57.87    3.38
   3  -1  -2  414.13   15.01
  -3  -1   2  409.90   15.29
  -3  -1   2  417.31   14.40
   3   1  -2  412.04   15.28
  -3   1   2  415.16   15.02
  -1  -1   2  124.78    5.20
   1  -1  -2  125.74    4.56
   1  -1  -2  128.75    4.94
  -1  -1   2  130.24    4.76
  -1   1   2  125.71    4.90
  -1   1   2  126.78    4.55
   1   1  -2  132.77    4.76
   1   1  -2  126.48    5.17
   1  -1   2   79.85    3.13
   1  -1   2   83.96    3.37
   1   1   2   83.42    3.20
   1   1   2   80.32    3.49
  -1   1  -2   79.54    3.14
   3  -1   2   41.96    1.86
   3  -1   2   42.43    2.33
  -3  -1  -2   40.26    1.99
  -3  -1  -2   43.02    2.47
   3   1   2   42.01    1.97
  -3   1  -2   43.43    2.36
   3   1   2   42.19    2.49
  -3   1  -2   39.35    1.85
  -5  -1  -2   12.15    1.82
   5  -1   2    9.97    0.81
   5  -1   2   11.17    0.69
   5  -1   2   11.95    1.35
  -5  -1  -2   10.28    0.93
   5   1   2   11.00    0.91
   5   1   2    8.90    1.47
  -5   1  -2   11.16    1.58
  -7  -1  -2   65.81    4.00
   7  -1   2   61.18    2.70
  -7  -1  -2   65.22    2.98
   7  -1   2   61.12    2.49
   7  -1   2   66.71    3.89
   7   1   2   65.36    2.92
   7   1   2   58.17    3.85
  -7   1  -2   58.41    3.70
   9  -1   2   39.73    2.02
  -9  -1  -2   42.56    2.31
   9  -1   2   44.84    3.29
   9   1   2   44.38    2.22
   9   1   2   43.78    3.39
  11  -1   2   33.22    2.99
  11   1   2   28.88    1.82
  11   1   2   31.09    2.98
  11   1   2   25.48    1.61
  13  -1   2   15.69    2.48
  13   1   2   14.37    1.21
  13   1   2   11.06    1.15
  13   1   2   11.59    2.24
  14  -2  -2    0.18    0.60
 -14  -2   2    2.33    0.64
  14   2  -2    2.74    1.36
 -12  -2   2    0.02    0.34
  12  -2  -2   -0.16    0.64
  12   2  -2   -0.26    0.67
  12   2  -2    0.75    0.45
 -10  -2   2   40.05    2.28
  10  -2  -2   39.57    3.31
  10   2  -2   37.91    3.46
  10   2  -2   39.75    2.22
  -8  -2   2   70.75    3.33
   8   2  -2   68.63    3.26
   6  -2  -2   46.52    3.15
  -6  -2   2   43.90    3.27
  -6  -2   2   45.49    2.43
   6   2  -2   47.54    3.46
  -6   2   2   44.60    3.07
  -4  -2   2    5.92    0.81
  -4  -2   2    6.59    1.40
   4  -2  -2    5.10    1.01
  -4   2   2    7.43    1.26
   4   2  -2    6.56    0.86
   4   2  -2    6.70    1.51
   2  -2  -2  340.98   12.41
  -2  -2   2  316.95   12.75
   2  -2  -2  319.34   11.52
   2   2  -2  344.78   12.94
   2   2  -2  337.44   11.94
  -2   2   2  351.68   12.46
  -2   2   2  325.48   11.53
   0  -2   2    8.09    0.76
   0   2  -2    6.38    0.68
   0   2  -2    7.63    1.13
   0   2   2    8.09    0.72
   0   2   2    8.40    1.16
  -2  -2  -2   24.14    1.83
   2  -2   2   21.64    1.23
  -2  -2  -2   22.16    1.41
   2  -2   2   25.35    1.77
   2   2   2   18.65    1.85
  -2   2  -2   22.19    1.38
  -2   2  -2   22.33    1.67
   2   2   2   21.95    1.39
  -4  -2  -2    0.21    0.28
   4  -2   2    0.55    0.47
   4  -2   2    0.06    0.18
  -4  -2  -2    0.14    0.45
   4   2   2   -0.06    0.50
  -4   2  -2    0.37    0.27
  -4   2  -2    0.20    0.46
   4   2   2    0.24    0.25
  -6  -2  -2   59.28    4.23
   6  -2   2   66.79    2.53
  -6  -2  -2   69.74    3.23
   6  -2   2   68.27    3.85
  -6   2  -2   54.06    4.41
   6   2   2   65.59    4.11
  -8  -2  -2   31.73    2.02
   8  -2   2   31.58    2.64
   8   2   2   28.79    1.86
   8   2   2   33.75    2.95
  10  -2   2   13.53    2.09
 -10  -2  -2   12.07    1.25
  10   2   2   12.32    2.17
  10   2   2   13.94    1.24
  12  -2   2    6.14    1.65
 -12  -2  -2    7.88    1.18
  12   2   2    7.39    1.75
  14  -2   2   24.17    2.66
  14   2   2   19.30    1.61
  14   2   2   18.10    2.84
  13  -3  -2    1.74    1.05
 -13  -3   2    1.46    0.63
  13   3  -2    0.63    0.95
  11  -3  -2   32.84    3.05
  11   3  -2   23.61    3.28
  -9  -3   2    0.54    0.46
   9  -3  -2    0.06    0.57
   9   3  -2    0.05    0.72
   9   3  -2    0.32    0.33
  -7  -3   2   98.13    4.41
   7  -3  -2   91.70    5.20
   7   3  -2   97.63    4.35
   7   3  -2   87.37    5.58
  -5  -3   2    0.90    0.55
   5  -3  -2    0.71    0.64
   5  -3  -2    0.66    0.23
  -5  -3   2    0.13    0.36
   5   3  -2   -0.10    0.32
   5   3  -2    2.01    1.17
  -5   3   2    0.49    0.18
  -5   3   2    0.99    0.70
  -3  -3   2    7.77    1.59
  -3  -3   2    6.51    1.07
   3  -3  -2    4.29    1.15
   3   3  -2    8.57    0.91
  -3   3   2    6.49    0.63
  -3   3   2    7.96    1.38
   3   3  -2    6.91    1.60
   1  -3  -2  219.05    8.90
  -1  -3   2  214.29    8.21
  -1  -3   2  218.98    9.18
   1  -3  -2  208.72    7.95
  -1   3   2  225.77    8.83
  -1   3   2  216.55    8.00
   1   3  -2  211.59    9.09
   1   3  -2  214.28    8.19
   1  -3   2  177.81    6.85
  -1  -3  -2  192.75    7.78
  -1  -3  -2  178.19    6.95
  -1   3  -2  188.34    6.90
   1   3   2  186.73    7.01
  -1   3  -2  172.93    7.59
   1   3   2  162.54    7.71
  -3  -3  -2   58.29    3.02
  -3  -3  -2   62.11    3.74
   3  -3   2   62.56    2.73
   3  -3   2   68.24    3.69
  -3   3  -2   60.43    3.54
   3   3   2   58.62    3.94
  -3   3  -2   61.56    2.76
   3   3   2   65.69    3.11
   5  -3   2  108.96    4.17
  -5  -3  -2  104.64    5.68
  -5  -3  -2  109.32    4.70
   5  -3   2  106.33    5.29
   5   3   2  106.58    4.65
  -5   3  -2   99.40    5.84
  -5   3  -2   94.20    4.12
   5   3   2  103.63    5.80
   7  -3   2    6.19    0.43
   7  -3   2    5.43    1.31
  -7  -3  -2    6.82    1.15
   7   3   2    7.48    1.19
   7   3   2    4.81    1.51
   9  -3   2    1.07    0.51
  -9  -3  -2    2.42    0.69
   9   3   2    3.29    1.44
 -11  -3  -2   15.26    1.48
  11  -3   2   12.99    2.18
  11   3   2   18.18    2.89
  13  -3   2    2.17    1.05
 -13  -3  -2   -0.34    0.36
  13   3   2    0.26    0.85
 -12  -4   2    3.72    0.88
  12  -4  -2    3.23    1.24
  12   4  -2    2.20    1.04
 -10  -4   2    2.81    0.82
  10  -4  -2    4.42    1.33
  10   4  -2    2.43    1.09
   8  -4  -2    3.82    1.26
   8   4  -2    1.99    1.19
  -6  -4   2    0.41    0.45
   6  -4  -2    0.34    0.55
   6  -4  -2    0.63    0.23
  -6   4   2    0.68    0.23
   6   4  -2   -0.06    0.79
   4  -4  -2    0.98    0.81
  -4  -4   2    2.74    0.97
  -4  -4   2    0.94    0.53
   4  -4  -2    2.16    0.47
  -4   4   2    1.78    0.77
  -4   4   2    2.64    0.52
   4   4  -2    2.38    0.70
   4   4  -2    3.17    1.33
  -2  -4   2   25.27    2.47
   2  -4  -2   25.63    2.34
  -2  -4   2   23.49    1.79
   2  -4  -2   24.79    1.57
  -2   4   2   28.16    1.66
   2   4  -2   24.64    1.78
   2   4  -2   26.36    2.61
  -2   4   2   26.41    2.17
   0  -4   2    6.02    0.96
   0  -4  -2    6.84    0.93
   0   4   2    8.07    1.12
   0   4   2    6.86    1.52
   0   4  -2    7.48    1.58
   0   4  -2    6.94    1.39
   0   4  -2    8.12    1.19
   0   4   2    9.53    1.61
  -2  -4  -2    0.67    0.35
  -2  -4  -2    1.93    0.81
   2  -4   2    1.09    0.40
   2  -4   2    1.24    0.68
   2   4   2    1.34    1.00
  -2   4  -2    2.29    0.56
   2   4   2    0.89    0.42
  -2   4  -2    0.11    0.37
  -4  -4  -2   17.69    2.51
   4  -4   2   12.45    1.95
   4  -4   2   12.51    1.02
  -4  -4  -2   16.04    1.44
  -4   4  -2   15.72    1.67
   4   4   2   12.87    1.27
   4   4   2   16.04    2.69
  -4   4  -2   13.41    1.08
   6  -4   2    4.36    0.60
  -6  -4  -2    5.14    1.05
   6  -4   2    5.04    1.32
   6   4   2    2.47    1.37
  -6   4  -2    5.52    0.80
   8  -4   2    1.19    0.71
  -8  -4  -2    0.79    0.56
   8   4   2    2.02    1.04
  10  -4   2    4.93    1.51
 -10  -4  -2    2.78    0.87
  10   4   2    0.91    0.90
  12  -4   2    1.44    0.86
 -12  -4  -2    1.23    0.62
  12   4   2    0.97    0.93
 -13  -5   2    6.86    1.26
  13  -5  -2    6.32    1.48
  13   5  -2    3.96    1.40
  11  -5  -2    1.77    0.98
 -11  -5   2    0.57    0.52
  11   5  -2    0.51    0.94
  -9  -5   2   -0.18    0.37
   9  -5  -2    0.29    0.74
   9   5  -2    0.22    0.78
   7  -5  -2    2.65    0.58
  -7  -5   2    2.25    0.76
   7  -5  -2    2.87    1.09
  -7   5   2    3.42    0.48
   7   5  -2    2.00    1.15
   5  -5  -2    4.00    0.65
   5  -5  -2    3.78    1.23
  -5  -5   2    2.02    0.91
  -5   5   2    4.08    0.67
   5   5  -2    3.75    1.52
   3  -5  -2   12.58    1.05
   3  -5  -2   12.32    2.08
  -3  -5   2   12.78    1.36
  -3   5   2   10.73    1.03
   3   5  -2   10.62    2.13
  -1  -5   2    6.31    1.04
   1  -5  -2    9.34    1.02
   1   5  -2    9.84    1.93
  -1   5   2    9.97    1.04
  -1   5   2   10.43    2.08
   1   5  -2    7.94    1.71
   1   5  -2   10.77    1.17
  -1   5   2   11.55    1.90
   1  -5   2   41.37    2.49
  -1  -5  -2   41.14    2.53
   1   5   2   48.16    3.66
   1   5   2   46.99    2.66
  -1   5  -2   40.52    2.78
  -1   5  -2   42.50    3.17
  -1   5  -2   44.98    3.38
   1   5   2   46.20    3.22
  -3  -5  -2   59.36    3.98
   3  -5   2   56.04    3.87
  -3  -5  -2   54.34    3.15
   3  -5   2   61.85    2.97
   3   5   2   52.79    4.15
  -3   5  -2   61.30    2.98
  -5  -5  -2    6.02    1.22
   5  -5   2    7.53    0.96
   5  -5   2    7.72    1.68
  -5   5  -2    6.49    0.93
   5   5   2    4.37    1.74
   7  -5   2    2.41    0.46
   7  -5   2    3.54    1.26
  -7  -5  -2    1.89    0.65
  -7   5  -2    3.66    0.65
   7   5   2    3.92    1.67
  -9  -5  -2    4.24    1.09
   9  -5   2    2.61    1.11
   9   5   2    5.91    1.80
  11  -5   2   -0.16    0.57
 -11  -5  -2    0.23    0.50
  11   5   2   -0.53    0.74
  13  -5   2    0.23    0.75
 -13  -5  -2    0.52    0.46
  13   5   2    0.34    0.64
  12  -6  -2    8.38    1.85
 -12  -6   2   13.34    1.78
  12   6  -2   11.91    2.59
 -10  -6   2   20.64    1.85
  10  -6  -2   21.29    2.97
  10   6  -2   17.42    3.03
  -8  -6   2    6.79    1.26
   8  -6  -2    8.15    1.83
  -8   6   2    6.59    0.64
   8   6  -2    5.45    1.69
  -6  -6   2    3.99    1.06
   6  -6  -2    5.68    1.59
   6  -6  -2    4.30    0.73
   6   6  -2    3.27    1.41
  -6   6   2    4.88    0.74
   4  -6  -2   12.29    2.18
  -4  -6   2    6.05    1.10
   4  -6  -2    9.23    0.98
   4   6  -2    8.76    2.05
  -2  -6   2   14.49    1.50
   2  -6  -2   17.25    1.43
  -2   6   2   14.47    1.32
   2   6  -2   11.73    2.16
  -2   6   2   16.27    2.49
   0  -6   2   24.03    1.89
   0  -6  -2   24.72    1.88
   0   6  -2   27.65    2.91
   2  -6   2    0.14    0.35
  -2  -6  -2   -0.38    0.35
  -2   6  -2   -0.25    0.58
  -2   6  -2    0.08    0.26
   2   6   2   -0.53    0.66
   4  -6   2   23.67    1.68
  -4  -6  -2   26.84    2.07
   4  -6   2   26.59    2.70
   4   6   2   19.32    3.05
  -4   6  -2   24.52    1.71
   6  -6   2   16.80    1.24
   6  -6   2   14.24    2.37
  -6  -6  -2   19.04    1.77
  -6   6  -2   15.66    1.25
   6   6   2   12.38    2.53
   8  -6   2    2.67    1.00
  -8  -6  -2    5.53    1.29
   8  -6   2    4.32    0.59
  -8   6  -2    4.39    0.74
   8   6   2    4.53    1.90
 -10  -6  -2    4.39    1.03
  10  -6   2    5.35    1.42
  10   6   2    5.15    1.70
 -12  -6  -2    9.89    1.64
  12  -6   2    9.17    1.92
  12   6   2    5.93    1.70
  11  -7  -2    1.22    0.96
 -11  -7   2    0.16    0.36
  11   7  -2    0.02    1.02
  -9  -7   2    3.89    0.90
   9   7  -2    3.30    1.42
   7  -7  -2    5.96    1.65
   7  -7  -2    7.12    0.89
  -7  -7   2    5.71    1.21
   7   7  -2    7.75    2.00
  -7   7   2    5.21    0.78
   5  -7  -2    3.26    1.27
  -5  -7   2    2.45    0.90
   5  -7  -2    3.84    0.76
   5   7  -2    5.25    1.88
  -5   7   2    2.20    0.65
  -3  -7   2    9.41    1.43
   3  -7  -2   11.28    1.22
  -3   7   2    9.03    2.08
   3   7  -2   15.70    2.81
   1  -7  -2    0.29    0.43
  -1  -7   2    0.06    0.37
  -1   7   2   -0.32    0.66
   1   7  -2   -0.27    0.80
  -1  -7  -2    8.68    1.32
   1  -7   2    8.51    1.39
  -1   7  -2   11.20    2.35
   1   7   2   10.51    2.22
  -3  -7  -2    6.47    1.17
  -3   7  -2    6.49    1.74
   3   7   2   12.41    2.51
  -5  -7  -2    0.00    0.43
   5  -7   2    0.04    0.35
   5  -7   2   -0.29    0.69
   5   7   2    0.41    1.10
   7  -7   2    8.85    1.93
   7  -7   2    7.45    0.95
  -7  -7  -2    6.88    1.38
  -7   7  -2    5.80    0.83
   7   7   2    5.74    1.87
   9  -7   2    3.02    0.49
   9  -7   2    3.63    1.28
  -9  -7  -2    1.89    0.72
  -9   7  -2    1.95    0.60
   9   7   2    3.32    1.44
  11  -7   2    2.26    1.15
 -11  -7  -2    1.40    0.69
  11   7   2    1.41    1.02
   8  -8  -2    7.41    0.88
   8  -8  -2    6.01    1.71
  -8  -8   2    4.35    1.17
  -8   8   2    4.34    0.74
   8   8  -2    8.11    2.32
   6  -8  -2   46.80    2.50
   6  -8  -2   46.41    3.88
  -6  -8   2   48.27    3.19
   6   8  -2   49.23    4.34
  -4  -8   2   21.25    2.01
   4  -8  -2   21.99    1.69
   4   8  -2   19.83    3.09
  -4   8   2   20.58    3.24
   2  -8  -2    0.94    0.55
  -2  -8   2    2.86    0.92
  -2   8   2    0.81    0.92
   2   8  -2    0.55    0.87
   0  -8  -2    0.61    0.61
   0  -8   2    0.56    0.52
   0   8   2    1.12    1.00
   0   8  -2    0.03    0.64
  -2  -8  -2    1.85    0.74
   2  -8   2    3.33    0.94
  -2   8  -2    2.72    1.33
   2   8   2    1.44    1.20
  -4  -8  -2    1.34    0.68
   4  -8   2    1.83    0.59
  -4   8  -2    2.27    1.25
   4   8   2    0.03    1.04
   6  -8   2    0.38    0.81
   6  -8   2    0.66    0.44
  -6  -8  -2   -0.15    0.44
   6   8   2   -0.74    0.82
   8  -8   2    6.69    0.87
  -8  -8  -2    5.42    1.24
   8  -8   2    5.21    1.33
   8   8   2    5.28    1.65
  -8   8  -2    3.92    0.77
   7  -9  -2    5.86    1.51
  -7  -9   2    7.54    1.46
   7  -9  -2    8.52    1.12
   7   9  -2    6.82    1.88
  -5  -9   2    6.68    1.44
   5  -9  -2    6.71    1.03
   5   9  -2    6.41    1.76
  -5   9   2    3.21    1.46
  -3  -9   2   31.14    2.38
   3  -9  -2   26.44    2.04
   3   9  -2   27.09    3.84
  -3   9   2   22.91    3.55
   1  -9  -2    4.20    0.98
  -1  -9   2    4.70    1.08
   1   9  -2    4.12    1.51
  -1   9   2    4.45    1.66
  -1  -9  -2    2.04    0.83
   1  -9   2    2.48    0.87
   1   9   2    2.60    1.42
  -1   9  -2    2.72    1.48
  -3  -9  -2    8.11    1.45
   3  -9   2    6.84    1.18
   3   9   2    7.90    2.24
  -3   9  -2    7.99    1.98
   5  -9   2    1.11    0.52
  -5  -9  -2    2.36    0.87
  -5   9  -2    1.14    1.19
   5   9   2    1.87    1.65
   7  -9   2    5.02    0.89
  -7  -9  -2    4.97    1.13
   7   9   2    4.80    1.69
  -4 -10   2   -0.10    0.39
   4 -10  -2    0.39    0.41
   4  10  -2   -1.03    1.02
  -4  10   2    0.70    0.85
  -2 -10   2    7.92    1.43
   2 -10  -2    9.31    1.43
  -2  10   2    6.25    1.88
   2  10  -2    8.97    2.18
   0 -10   2    1.21    0.79
   0  10  -2   -0.21    0.86
   0  10   2    1.46    1.08
   2 -10   2    0.57    0.45
  -2 -10  -2    0.87    0.55
   2  10   2   -0.76    0.73
  -2  10  -2    0.57    0.94
   4 -10   2    3.04    0.82
  -4 -10  -2    1.87    0.80
  -4  10  -2    6.17    1.88
   4  10   2    1.94    1.15
  14   0  -3   -1.29    0.39
  12   0  -3    1.28    0.86
  10   0  -3    0.21    0.20
  10   0  -3    0.27    0.61
 -10   0   3   -0.28    0.17
   8   0  -3   -0.21    0.18
   8   0  -3    1.05    0.77
  -8   0   3    0.15    0.18
   6   0  -3    0.19    0.41
  -6   0   3    0.02    0.19
  -6   0   3   -0.06    0.44
   6   0  -3    0.14    0.20
  -4   0   3    0.55    0.41
   4   0  -3   -0.12    0.41
  -4   0   3   -0.02    0.17
   4   0  -3    0.02    0.16
  -2   0   3    0.05    0.16
  -2   0   3   -0.01    0.30
   2   0  -3    0.04    0.28
   2   0  -3    0.06    0.17
   0   0   3    1.06    0.34
   0   0  -3    0.94    0.29
  -2   0  -3   -0.23    0.17
   2   0   3    0.08    0.25
   2   0   3   -0.09    0.18
  -2   0  -3    0.19    0.24
   4   0   3    0.00    0.34
   4   0   3    0.26    0.21
   4   0   3   -0.17    0.21
  -4   0  -3    0.25    0.31
   6   0   3    0.03    0.44
   6   0   3    0.12    0.21
  -6   0  -3    0.04    0.33
   6   0   3   -0.04    0.27
   8   0   3    0.45    0.62
   8   0   3   -0.37    0.14
  -8   0  -3    0.05    0.41
   8   0   3   -0.06    0.26
  10   0   3   -0.13    0.30
  10   0   3    1.19    0.86
  10   0   3    0.19    0.25
  12   0   3    0.06    0.26
  12   0   3    0.20    0.69
  12   0   3    0.46    0.41
  14   0   3    0.31    0.32
  14   0   3   -0.15    0.29
  13  -1  -3    3.99    1.38
 -13  -1   3    4.79    0.72
  13   1  -3    5.20    0.70
  13   1  -3    6.48    1.88
  11  -1  -3    0.67    0.85
 -11  -1   3    0.54    0.32
  11   1  -3    1.86    0.98
  11   1  -3    0.83    0.36
   9  -1  -3    0.79    0.70
  -9  -1   3    0.49    0.30
   9   1  -3    0.14    0.66
   9   1  -3    1.20    0.38
  -7  -1   3   20.80    2.12
   7  -1  -3   21.38    2.15
  -7  -1   3   21.20    1.38
   7   1  -3   21.85    1.35
  -7   1   3   21.78    2.07
   7   1  -3   19.58    2.17
   5  -1  -3   97.61    4.89
  -5  -1   3   99.91    4.03
  -5  -1   3   98.98    5.12
  -5   1   3   95.63    4.82
   5   1  -3  102.14    4.04
   5   1  -3   97.02    5.10
   3  -1  -3  141.92    4.90
  -3  -1   3  139.10    6.08
   3  -1  -3  132.51    5.76
   3   1  -3  141.30    6.08
  -3   1   3  133.71    4.94
  -3   1   3  141.85    5.81
   1  -1  -3    0.71    0.36
  -1  -1   3    0.78    0.56
  -1  -1   3    1.02    0.35
  -1   1   3    0.65    0.24
  -1   1   3    1.21    0.31
  -1   1   3    0.74    0.30
   1   1  -3    0.97    0.55
   1   1  -3    1.15    0.33
   1  -1   3   52.91    2.44
  -1  -1  -3   59.80    2.57
  -1  -1  -3   59.14    2.49
   1  -1   3   58.83    2.55
   1   1   3   59.52    2.67
  -1   1  -3   54.31    2.47
  -3  -1  -3  162.46    6.04
   3  -1   3  155.56    6.29
   3  -1   3  157.38    5.93
  -3   1  -3  153.65    5.94
   3   1   3  156.21    6.49
  -3   1  -3  160.60    6.34
   3   1   3  163.30    6.02
   5  -1   3    6.94    0.91
  -5  -1  -3    7.55    1.35
   5  -1   3    6.89    0.62
  -5  -1  -3    7.36    0.96
   5  -1   3    4.88    1.00
   5   1   3    8.72    1.04
   5   1   3    8.66    1.50
  -5   1  -3    8.52    1.39
  -7  -1  -3    0.50    0.39
   7  -1   3    1.21    0.67
   7  -1   3    0.43    0.38
  -7  -1  -3    1.59    0.68
   7  -1   3    0.79    0.28
  -7   1  -3    0.37    0.46
   7   1   3    0.88    0.65
   7   1   3    0.64    0.32
   9  -1   3    0.31    0.27
   9  -1   3    0.74    0.78
   9  -1   3    0.21    0.19
   9   1   3    0.31    0.80
   9   1   3    0.64    0.26
  11  -1   3    5.55    0.71
  11  -1   3    4.36    1.42
  11  -1   3    4.93    0.47
  11   1   3    5.55    0.97
  11   1   3    6.93    1.72
  11   1   3    4.31    0.91
  13  -1   3    4.18    1.30
  13   1   3    4.91    0.72
  13   1   3    7.23    1.13
  13   1   3    3.84    1.25
 -14  -2   3    0.33    0.36
  14  -2  -3   -0.20    0.65
  14   2  -3    0.65    0.96
  12  -2  -3    9.59    2.18
 -12  -2   3    8.82    1.18
  12   2  -3    7.64    1.96
  12   2  -3    8.50    0.90
  10  -2  -3   21.53    2.43
 -10  -2   3   19.89    1.46
  10   2  -3   16.21    1.32
  10   2  -3   17.11    2.81
   8  -2  -3   10.22    2.06
  -8  -2   3   13.09    1.19
   8   2  -3   12.54    2.48
   8   2  -3   12.59    1.12
  -6  -2   3   54.86    3.85
  -6  -2   3   59.94    2.93
   6  -2  -3   61.44    3.73
   6   2  -3   62.53    4.05
  -6   2   3   58.07    3.61
  -4  -2   3   21.60    2.07
  -4  -2   3   22.51    1.48
   4  -2  -3   19.54    1.80
  -4   2   3   20.64    0.94
  -4   2   3   22.38    1.85
  -4   2   3   21.03    1.02
   4   2  -3   20.17    2.06
   4   2  -3   21.97    1.47
   2  -2  -3  104.09    4.65
   2  -2  -3  103.52    3.94
  -2  -2   3   99.15    4.99
  -2  -2   3   95.96    4.24
   2   2  -3  109.13    4.33
  -2   2   3  101.17    3.92
  -2   2   3  107.59    4.66
   2   2  -3  107.12    5.10
   0  -2   3    3.44    0.56
   0  -2  -3    6.28    0.66
   0  -2   3    4.05    0.94
   0   2   3    6.44    0.84
   0   2   3    5.53    0.86
   0   2  -3    4.08    0.63
   0   2  -3    5.15    1.01
  -2  -2  -3   33.88    1.87
   2  -2   3   33.82    2.15
  -2  -2  -3   35.65    2.25
  -2   2  -3   32.16    1.72
   2   2   3   34.12    2.39
   2   2   3   33.38    1.85
  -2   2  -3   33.20    2.11
   4  -2   3   97.64    3.76
  -4  -2  -3   96.23    4.82
   4  -2   3   88.51    4.48
  -4  -2  -3   90.39    4.09
   4   2   3   95.57    4.92
  -4   2  -3   94.95    4.61
   4   2   3   99.19    4.15
  -6  -2  -3  107.47    4.58
   6  -2   3  100.80    3.95
  -6  -2  -3  106.49    5.45
   6  -2   3  106.20    5.20
  -6   2  -3   95.75    4.29
   6   2   3  102.67    4.46
   6   2   3  103.79    5.51
   8  -2   3   23.94    1.13
  -8  -2  -3   24.05    1.71
   8  -2   3   21.05    2.22
   8  -2   3   23.33    1.17
   8   2   3   20.95    2.83
  10  -2   3   14.53    2.23
 -10  -2  -3   16.76    1.41
  10   2   3   15.82    2.41
  10   2   3   14.12    1.24
  12  -2   3    1.52    1.04
  12   2   3    1.36    0.89
  14  -2   3    1.10    0.83
  14   2   3    0.72    0.52
  14   2   3    0.10    0.71
 -13  -3   3    2.64    0.74
  13  -3  -3    1.58    1.07
  13   3  -3    3.06    1.53
  11  -3  -3    2.50    1.14
  11   3  -3    3.86    1.47
  -9  -3   3    2.45    0.76
   9  -3  -3    0.29    0.53
   9   3  -3    0.93    1.09
   7  -3  -3    2.13    0.90
  -7  -3   3    0.88    0.44
   7   3  -3    0.46    0.74
   7   3  -3    0.86    0.46
   5  -3  -3    6.46    1.31
  -5  -3   3    9.03    1.79
  -5  -3   3   10.27    1.11
  -5   3   3    9.31    1.53
  -5   3   3    7.69    0.54
   5   3  -3    7.74    1.83
   5   3  -3    9.81    1.31
  -3  -3   3    3.11    0.72
  -3  -3   3    2.32    0.97
   3  -3  -3    3.43    0.93
   3  -3  -3    3.12    0.53
   3   3  -3    3.71    1.25
   3   3  -3    3.21    0.75
  -3   3   3    3.50    0.55
  -3   3   3    3.55    0.91
  -1  -3   3  228.82    8.68
  -1  -3   3  221.81    9.60
   1  -3  -3  221.90    8.43
   1  -3  -3  225.88    9.30
  -1   3   3  229.42    9.18
   1   3  -3  234.67    8.72
  -1   3   3  222.39    8.44
   1   3  -3  251.43    9.74
  -1  -3  -3   36.43    2.12
  -1  -3  -3   40.69    2.64
   1  -3   3   39.93    2.15
  -1   3  -3   41.89    2.16
  -1   3  -3   34.43    2.51
  -1   3  -3   43.95    2.78
   1   3   3   40.64    2.18
   1   3   3   39.03    2.78
   3  -3   3   69.26    3.77
   3  -3   3   68.11    2.95
  -3  -3  -3   64.80    3.20
  -3  -3  -3   65.35    3.82
   3   3   3   64.73    4.09
   3   3   3   67.74    3.23
  -3   3  -3   62.56    2.93
  -3   3  -3   60.95    3.62
  -5  -3  -3    2.30    0.81
  -5  -3  -3    2.46    0.67
   5  -3   3    2.11    0.45
   5  -3   3    2.65    0.93
  -5   3  -3    2.60    0.56
   5   3   3    2.18    0.96
   5   3   3    2.97    0.77
   7  -3   3   33.63    2.73
   7  -3   3   32.51    1.55
  -7  -3  -3   38.03    2.32
  -7   3  -3   36.51    2.04
   7   3   3   33.57    2.13
   7   3   3   36.74    3.13
  -9  -3  -3    0.98    0.47
   9  -3   3    1.92    1.02
   9   3   3    0.39    0.82
  11  -3   3    0.19    0.56
 -11  -3  -3    0.60    0.56
  11   3   3    0.71    0.78
 -13  -3  -3    0.01    0.36
  13  -3   3    0.31    0.60
  13   3   3    1.03    0.84
  12  -4  -3    5.39    1.48
 -12  -4   3    9.40    1.37
  12   4  -3    5.86    1.77
  10  -4  -3    5.70    1.46
 -10  -4   3    8.81    1.37
  10   4  -3    5.04    1.61
  -8  -4   3   12.15    1.75
   8  -4  -3    9.58    1.93
   8   4  -3    7.39    1.81
  -6  -4   3    1.35    0.62
   6  -4  -3   -0.05    0.68
  -6   4   3    0.54    0.20
   6   4  -3   -0.13    0.71
   4  -4  -3   71.10    4.19
   4  -4  -3   67.84    2.93
  -4  -4   3   63.42    4.34
  -4  -4   3   70.30    3.55
  -4   4   3   61.53    3.91
   4   4  -3   71.35    3.52
  -4   4   3   65.48    2.91
   4   4  -3   71.89    4.64
  -2  -4   3  147.63    7.35
   2  -4  -3  140.98    6.94
  -2  -4   3  147.22    6.25
   2  -4  -3  148.56    5.89
  -2   4   3  146.32    6.78
   2   4  -3  156.41    7.45
   2   4  -3  160.98    6.40
  -2   4   3  149.79    5.94
   0  -4  -3  128.79    5.27
   0  -4   3  123.65    5.30
   0   4   3  124.80    5.25
   0   4  -3  117.24    6.06
   0   4   3  125.37    5.91
   0   4   3  124.46    6.22
   0   4  -3  126.53    5.32
  -2  -4  -3  297.20   11.45
   2  -4   3  308.47   11.23
   2  -4   3  289.19   12.20
  -2  -4  -3  315.29   12.42
  -2   4  -3  318.10   11.31
   2   4   3  325.56   11.55
   2   4   3  295.36   12.65
  -2   4  -3  289.30   12.20
  -4  -4  -3    0.35    0.52
   4  -4   3   -0.41    0.50
   4  -4   3    0.26    0.19
  -4  -4  -3    0.35    0.35
   4   4   3    0.22    0.82
   4   4   3    0.00    0.26
  -4   4  -3   -0.04    0.38
  -4   4  -3    0.26    0.24
   6  -4   3    7.21    0.70
  -6  -4  -3   10.19    1.55
   6  -4   3    8.55    1.60
   6   4   3   12.31    2.40
  -6   4  -3    9.10    0.90
   8  -4   3   33.76    2.88
  -8  -4  -3   36.73    2.41
  -8   4  -3   30.18    1.60
   8   4   3   39.02    3.42
 -10  -4  -3    9.44    1.42
  10  -4   3    7.96    1.70
  10   4   3    4.97    1.65
 -12  -4  -3    7.63    1.23
  12  -4   3    9.46    1.93
  12   4   3    8.19    2.01
 -13  -5   3    4.38    1.01
  13  -5  -3    2.18    1.05
  13   5  -3    3.20    1.42
  11  -5  -3    1.92    1.00
 -11  -5   3    1.74    0.69
  11   5  -3    0.81    1.03
   9  -5  -3    0.85    0.74
  -9  -5   3    0.71    0.52
   9   5  -3    0.65    0.87
   7  -5  -3   25.58    2.45
  -7  -5   3   23.68    1.93
   7   5  -3   29.41    3.91
  -7   5   3   19.63    1.13
   5  -5  -3   11.19    1.94
   5  -5  -3   14.36    1.06
  -5  -5   3   12.92    1.71
  -5   5   3   15.02    1.07
   5   5  -3   11.53    2.40
   3  -5  -3    2.55    1.10
   3  -5  -3    2.29    0.56
  -3  -5   3    1.22    0.58
   3   5  -3    1.95    1.22
  -3   5   3    2.49    0.61
   1  -5  -3  290.55   10.99
  -1  -5   3  292.01   11.25
  -1   5   3  276.19   11.95
   1   5  -3  283.49   12.42
  -1   5   3  299.03   12.48
  -1   5   3  307.80   11.46
   1   5  -3  301.68   11.29
  -1  -5  -3   90.26    4.35
   1  -5   3   88.64    4.26
  -1   5  -3   89.23    4.27
   1   5   3   96.41    5.14
   1   5   3   90.89    5.42
   1   5   3   97.53    4.44
  -1   5  -3   92.58    5.21
  -1   5  -3   98.78    5.40
  -3  -5  -3   49.28    2.87
   3  -5   3   46.08    2.52
  -3  -5  -3   45.95    3.38
   3  -5   3   43.14    3.29
  -3   5  -3   48.30    2.59
   3   5   3   46.13    3.81
   5  -5   3    1.54    0.50
   5  -5   3    1.35    0.80
  -5  -5  -3    0.80    0.50
  -5   5  -3    1.49    0.41
   5   5   3    0.75    0.91
   7  -5   3   19.98    2.17
  -7  -5  -3   20.52    1.85
   7  -5   3   21.69    1.21
   7   5   3   20.67    3.16
  -7   5  -3   16.12    1.29
   9  -5   3    2.99    1.11
  -9  -5  -3    2.98    0.91
   9   5   3    4.80    1.71
 -11  -5  -3    0.38    0.38
  11  -5   3    0.82    0.83
  11   5   3    0.11    0.84
 -13  -5  -3    0.93    0.65
  13  -5   3    0.44    0.67
  13   5   3    0.15    0.94
  12  -6  -3    0.90    0.77
 -12  -6   3    1.51    0.69
  12   6  -3    4.37    1.62
 -10  -6   3    0.54    0.41
  10  -6  -3   -0.07    0.69
  10   6  -3    1.42    1.10
  -8  -6   3    2.77    0.91
   8  -6  -3    2.09    1.22
  -8   6   3    1.14    0.33
   8   6  -3    0.30    1.01
   6  -6  -3   15.69    2.44
  -6  -6   3   14.37    1.53
   6  -6  -3   10.57    0.92
  -6   6   3   11.58    0.97
   6   6  -3   10.49    2.39
  -4  -6   3    1.06    0.62
   4  -6  -3    0.96    0.46
   4  -6  -3    1.38    1.02
  -4   6   3    0.43    0.30
   4   6  -3    1.01    0.72
  -2  -6   3   77.65    4.16
   2  -6  -3   83.71    3.92
  -2   6   3   87.22    3.99
  -2   6   3   83.33    5.24
   2   6  -3   75.77    5.19
   0  -6   3   19.44    1.67
   0  -6  -3   17.61    1.58
   0   6  -3   21.85    2.49
   0   6   3   12.57    2.55
  -2  -6  -3   18.32    1.67
   2  -6   3   20.12    1.62
  -2   6  -3   17.13    1.49
   2   6   3   13.88    2.78
  -2   6  -3   19.97    2.97
   4  -6   3   77.41    3.66
  -4  -6  -3   75.81    4.06
   4  -6   3   76.90    4.83
   4   6   3   73.85    5.25
  -4   6  -3   80.46    3.74
  -6  -6  -3   21.72    1.91
   6  -6   3   17.50    2.57
   6  -6   3   20.80    1.43
  -6   6  -3   18.86    1.43
   6   6   3   17.88    2.84
   8  -6   3    0.11    0.24
   8  -6   3   -0.63    0.50
  -8  -6  -3    0.68    0.53
   8   6   3    0.19    1.00
  -8   6  -3   -0.52    0.23
 -10  -6  -3    3.70    1.01
  10  -6   3    5.38    1.62
  10   6   3    4.90    1.67
  12  -6   3    2.56    1.21
 -12  -6  -3    1.26    0.76
  12   6   3    0.81    0.93
 -11  -7   3    0.28    0.41
  11  -7  -3    1.13    0.88
  11   7  -3    0.17    0.69
  -9  -7   3    3.67    0.89
  -7  -7   3    0.27    0.60
   7  -7  -3    0.73    0.37
   7  -7  -3   -0.03    0.75
   7   7  -3   -1.31    0.81
  -5  -7   3   46.27    3.02
   5  -7  -3   46.49    2.44
   5  -7  -3   48.42    3.81
   5   7  -3   46.00    4.07
  -5   7   3   39.30    2.39
   3  -7  -3   48.95    2.77
  -3  -7   3   50.14    3.15
   3   7  -3   48.35    4.09
  -3   7   3   54.21    4.23
  -1  -7   3    0.28    0.38
   1  -7  -3    0.47    0.43
  -1   7   3    0.31    0.78
   1   7  -3   -0.42    0.72
  -1  -7  -3    3.68    0.92
   1  -7   3    6.11    1.23
   1   7   3    5.09    1.65
  -1   7  -3    3.28    1.28
  -3  -7  -3   87.32    4.51
   3  -7   3   86.91    4.25
   3   7   3   87.03    5.85
  -3   7  -3   92.86    5.70
   5  -7   3    4.19    0.85
   5  -7   3    5.03    1.50
  -5  -7  -3    3.83    0.93
   5   7   3    3.88    1.67
  -7  -7  -3    4.50    1.17
   7  -7   3    4.95    0.79
   7  -7   3    3.01    1.33
   7   7   3    4.02    1.54
  -7   7  -3    2.96    0.60
  -9  -7  -3   -0.22    0.42
   9  -7   3    1.07    0.30
   9  -7   3    0.44    0.68
  -9   7  -3   -0.35    0.34
   9   7   3    0.69    0.80
 -11  -7  -3    3.04    1.00
  11  -7   3    3.45    1.18
  11   7   3    3.12    1.46
   8  -8  -3    0.30    0.85
   8  -8  -3    0.43    0.32
  -8  -8   3   -0.15    0.53
   8   8  -3   -0.15    0.80
   6  -8  -3    9.39    1.02
  -6  -8   3    5.70    1.14
   6  -8  -3    7.65    1.80
   6   8  -3   12.20    2.63
   4  -8  -3    0.95    0.59
  -4  -8   3    2.83    0.98
   4   8  -3    1.76    1.07
  -4   8   3    4.09    1.53
  -2  -8   3   15.59    1.69
   2  -8  -3   15.88    1.54
  -2   8   3   13.92    2.66
   2   8  -3   14.52    2.53
   0  -8   3    2.38    0.85
   0  -8  -3    1.35    0.65
   0   8  -3    4.78    1.56
   0   8   3    0.79    1.11
   2  -8   3    1.26    0.62
  -2  -8  -3    0.37    0.51
  -2   8  -3    0.11    0.71
   2   8   3    2.92    1.38
   4  -8   3   15.84    1.43
  -4  -8  -3   10.90    1.68
   4   8   3   14.88    2.81
  -4   8  -3   11.39    2.36
  -6  -8  -3    1.49    0.72
   6  -8   3    2.55    0.71
   6   8   3    0.48    1.01
  -8  -8  -3    1.77    0.82
   8  -8   3   -0.11    0.65
   8  -8   3    0.80    0.36
   8   8   3    2.59    1.41
   7  -9  -3   11.24    1.10
   7  -9  -3    8.77    1.86
  -7  -9   3   11.66    1.86
   7   9  -3   12.62    2.62
   5  -9  -3    2.55    0.69
  -5  -9   3    1.88    0.80
  -5   9   3    2.75    1.29
   5   9  -3    0.99    1.00
   3  -9  -3    0.62    0.53
  -3  -9   3    0.83    0.62
   3   9  -3   -0.34    0.64
  -3   9   3   -1.16    0.67
   1  -9  -3   16.46    1.60
  -1  -9   3   17.18    1.76
   1   9  -3   13.50    2.56
  -1   9   3   16.75    2.97
   1  -9   3    4.93    1.07
  -1  -9  -3    6.12    1.16
  -1   9  -3    8.46    2.45
   1   9   3    4.59    1.59
  -3  -9  -3    1.00    0.52
   3  -9   3    1.41    0.65
  -3   9  -3    0.27    0.91
   3   9   3    1.62    1.30
  -5  -9  -3    6.02    1.33
   5  -9   3    6.33    1.16
  -5   9  -3    6.06    1.77
   7  -9   3    0.74    0.48
  -7  -9  -3    1.40    0.70
   7   9   3    0.87    1.23
  -4 -10   3    0.36    0.61
   4 -10  -3    0.15    0.29
   4  10  -3    0.50    1.20
  -4  10   3   -1.27    0.74
  -2 -10   3    0.51    0.59
   2 -10  -3    0.24    0.33
  -2  10   3   -0.09    0.86
   2  10  -3    0.19    0.98
   0 -10   3    0.05    0.39
   0  10   3    0.78    1.06
   0  10  -3   -0.73    0.68
  -2 -10  -3    1.20    0.76
   2 -10   3    2.24    0.78
  -2  10  -3    1.16    1.01
   2  10   3    1.25    1.08
   4 -10   3   -0.07    0.41
  -4 -10  -3    0.32    0.51
   4  10   3    0.23    0.89
  -4  10  -3   -0.37    0.80
  14   0  -4    7.01    1.74
  12   0  -4   49.86    3.98
 -10   0   4   45.57    2.09
  10   0  -4   53.79    3.93
  10   0  -4   47.03    2.12
   8   0  -4   63.81    2.70
   8   0  -4   62.31    4.14
  -8   0   4   64.17    2.66
   6   0  -4   21.26    2.07
  -6   0   4   22.98    2.37
   6   0  -4   23.76    1.34
  -6   0   4   20.12    1.17
   4   0  -4    0.94    0.31
  -4   0   4    0.59    0.25
   4   0  -4    0.76    0.52
  -4   0   4    0.08    0.39
  -2   0   4   60.29    2.58
   2   0  -4   61.93    2.61
   2   0  -4   55.68    2.79
  -2   0   4   63.75    3.15
   0   0  -4  109.65    3.89
   0   0  -4  115.72    4.44
   0   0   4  109.99    3.93
   0   0   4  113.44    4.46
  -2   0  -4   19.61    1.50
   2   0   4   27.71    1.38
  -2   0  -4   27.27    1.40
   2   0   4   26.22    1.53
   4   0   4 1000.00   33.53
   4   0   4  944.81   33.88
   4   0   4  998.81   33.40
   6   0   4  173.95    6.69
   6   0   4  177.60    6.87
   6   0   4  193.53    7.77
  -6   0  -4  167.53    7.58
   8   0   4   77.35    3.45
   8   0   4   82.90    3.73
  -8   0  -4   83.83    4.68
   8   0   4   84.79    4.71
  10   0   4    2.90    1.11
  10   0   4    2.70    0.73
  10   0   4    3.01    0.60
  12   0   4   23.30    1.38
  12   0   4   23.81    1.64
  12   0   4   24.12    2.57
  14   0   4    0.77    0.42
  14   0   4    1.62    0.41
 -13  -1   4   15.64    1.07
  13  -1  -4   12.13    2.29
  13   1  -4   12.88    2.46
  13   1  -4   11.23    1.01
  11  -1  -4    2.42    1.06
 -11  -1   4    3.51    0.67
  11   1  -4    5.23    1.44
  11   1  -4    2.79    0.58
  -9  -1   4  110.75    4.46
   9  -1  -4  101.32    5.86
   9   1  -4  115.06    6.21
   9   1  -4  107.57    4.45
  -7  -1   4    4.02    0.71
   7  -1  -4    5.05    1.30
  -7  -1   4    4.08    1.16
   7   1  -4    3.42    1.07
  -7   1   4    4.78    1.24
   7   1  -4    4.45    0.69
   5  -1  -4   16.76    1.71
   5  -1  -4   16.04    0.85
  -5  -1   4   16.28    1.15
  -5  -1   4   16.59    1.76
  -5   1   4   16.11    1.56
  -5   1   4   14.83    0.77
   5   1  -4   14.84    1.10
   5   1  -4   17.33    2.22
  -3  -1   4   38.34    2.48
  -3  -1   4   35.74    1.86
   3  -1  -4   34.36    2.19
   3  -1  -4   37.86    1.66
   3   1  -4   32.98    2.33
  -3   1   4   35.32    1.69
  -3   1   4   38.09    2.22
   1  -1  -4   27.39    1.54
  -1  -1   4   23.99    1.73
  -1  -1   4   28.09    1.55
   1   1  -4   28.11    1.75
  -1   1   4   30.58    1.50
  -1   1   4   26.51    1.48
   1  -1   4  104.70    4.32
  -1  -1  -4  113.20    4.20
   1  -1   4  109.78    4.22
   1   1   4  100.63    4.26
  -1   1  -4  105.85    4.22
   1   1   4  107.94    4.24
  -3  -1  -4  206.69    8.04
   3  -1   4  202.92    7.71
   3  -1   4  206.62    7.89
  -3  -1  -4  212.20    7.76
   3   1   4  213.13    7.71
  -3   1  -4  197.01    7.69
  -5  -1  -4   44.81    2.81
   5  -1   4   37.89    2.15
  -5  -1  -4   43.94    2.30
   5  -1   4   43.02    2.64
   5   1   4   44.75    2.80
  -5   1  -4   44.72    2.71
   7  -1   4  118.67    4.86
   7  -1   4  126.46    5.89
   7  -1   4  113.67    4.55
  -7  -1  -4  114.68    5.87
   7   1   4  126.24    5.99
   7   1   4  116.54    4.86
  -7   1  -4  112.03    5.70
   9  -1   4   10.82    0.80
   9  -1   4   10.38    1.91
   9  -1   4   11.66    1.05
   9   1   4   11.62    1.17
   9   1   4   11.35    1.00
  11  -1   4    1.67    0.37
  11  -1   4    2.45    0.52
  11  -1   4    1.69    0.89
  11   1   4    1.58    1.01
  11   1   4    1.59    0.70
  11   1   4    2.40    0.49
  13  -1   4   10.46    2.02
  13   1   4   17.69    1.48
  13   1   4   13.11    2.31
  13   1   4   14.77    1.17
 -14  -2   4   24.60    1.60
  14  -2  -4   23.26    3.23
  14   2  -4   15.72    2.79
  12  -2  -4    3.66    1.40
 -12  -2   4    4.84    0.89
  12   2  -4    5.39    0.83
  12   2  -4    3.71    1.36
  10  -2  -4    4.53    1.29
 -10  -2   4    6.10    0.97
  10   2  -4    6.37    1.00
  10   2  -4    3.96    1.37
  -8  -2   4   66.98    3.24
   8  -2  -4   62.09    4.20
   8   2  -4   68.60    4.54
   8   2  -4   70.29    3.25
   6  -2  -4   12.20    1.83
  -6  -2   4   14.14    1.20
  -6  -2   4   13.86    2.10
  -6   2   4   14.42    1.62
   6   2  -4   10.60    1.90
  -4  -2   4   12.02    1.87
   4  -2  -4    7.01    1.31
  -4  -2   4    9.61    0.98
   4   2  -4    9.49    0.92
  -4   2   4    9.07    0.59
   4   2  -4   12.25    1.82
  -4   2   4   10.38    1.19
  -4   2   4    8.09    0.66
  -2  -2   4    6.85    1.30
   2  -2  -4    6.46    1.08
  -2  -2   4    7.40    1.04
   2  -2  -4    5.64    0.62
   2   2  -4    8.51    1.40
  -2   2   4    6.10    1.03
   2   2  -4    7.52    0.82
   0  -2   4  150.14    6.69
   0  -2  -4  170.63    6.23
   0  -2   4  160.78    6.28
   0   2   4  162.92    6.18
   0   2  -4  164.51    6.28
   0   2   4  164.43    6.43
   0   2  -4  165.59    6.69
   2  -2   4  144.30    5.59
  -2  -2  -4  144.46    5.74
   2  -2   4  146.99    6.05
  -2   2  -4  150.46    5.70
  -2   2  -4  146.54    6.06
   2   2   4  145.07    5.72
   2   2   4  131.72    6.20
  -4  -2  -4   56.55    2.88
   4  -2   4   56.30    3.18
   4  -2   4   55.51    2.60
  -4  -2  -4   57.90    3.36
  -4   2  -4   56.25    3.21
   4   2   4   58.31    3.50
   4   2   4   60.24    2.88
  -4   2  -4   57.50    2.76
   6  -2   4   11.65    1.80
  -6  -2  -4    9.94    1.08
  -6  -2  -4    9.33    1.62
   6  -2   4   10.66    0.85
   6   2   4    9.08    1.70
   6   2   4    9.52    1.00
  -6   2  -4   10.30    1.91
  -6   2  -4   10.62    0.84
   8  -2   4  155.37    5.75
   8  -2   4  151.49    5.63
   8  -2   4  150.12    7.17
  -8  -2  -4  156.34    6.39
   8   2   4  153.00    6.27
   8   2   4  152.00    7.47
  10  -2   4    0.99    0.82
 -10  -2  -4    0.61    0.50
  10   2   4   -0.32    0.61
  12  -2   4    7.88    1.64
  12   2   4    6.11    1.56
  14  -2   4    2.27    1.09
  14   2   4    2.35    1.23
  14   2   4    1.54    0.65
 -13  -3   4   11.97    1.47
  13  -3  -4    8.32    1.96
  13   3  -4    7.76    2.02
  11  -3  -4    3.18    1.19
  11   3  -4    5.04    1.49
  -9  -3   4   -0.21    0.29
   9  -3  -4    0.63    0.76
   9   3  -4   -0.01    0.71
   7  -3  -4   59.48    4.05
  -7  -3   4   65.60    3.29
   7   3  -4   63.85    3.26
   5  -3  -4   62.08    3.83
  -5  -3   4   62.20    3.23
  -5  -3   4   62.98    4.15
  -5   3   4   74.36    4.00
  -5   3   4   61.10    2.48
   5   3  -4   69.74    4.46
  -5   3   4   59.63    2.56
   5   3  -4   62.63    3.20
  -3  -3   4   19.43    2.12
   3  -3  -4   22.51    1.28
  -3  -3   4   20.99    1.59
   3  -3  -4   22.75    1.96
  -3   3   4   25.11    1.96
  -3   3   4   18.49    1.18
   3   3  -4   20.52    2.22
   3   3  -4   18.27    1.45
  -1  -3   4  107.58    4.67
  -1  -3   4  102.17    5.42
   1  -3  -4  108.84    5.18
   1  -3  -4  111.89    4.46
  -1   3   4  108.51    4.44
   1   3  -4  113.61    5.43
  -1   3   4  106.47    4.97
   1   3  -4  104.81    4.63
   1  -3   4   15.39    1.30
  -1  -3  -4   18.83    1.38
  -1   3  -4   19.96    1.73
   1   3   4   19.99    1.41
  -1   3  -4   17.31    1.30
   1   3   4   16.05    1.77
  -1   3  -4   18.49    1.78
  -3  -3  -4   52.27    3.28
  -3  -3  -4   52.20    2.81
   3  -3   4   53.15    2.57
   3  -3   4   51.62    3.17
  -3   3  -4   55.35    3.26
   3   3   4   51.61    3.52
   3   3   4   52.61    2.78
  -3   3  -4   56.62    2.68
  -5  -3  -4    3.84    0.82
  -5  -3  -4    2.80    0.89
   5  -3   4    5.06    1.20
   5  -3   4    5.76    0.75
  -5   3  -4    6.22    0.94
   5   3   4    5.69    1.20
   5   3   4    6.48    1.61
  -7  -3  -4   10.67    2.12
   7  -3   4    9.63    0.74
  -7  -3  -4   10.39    1.44
   7  -3   4    9.64    1.70
   7   3   4    9.65    1.36
   7   3   4    8.78    1.85
  -7   3  -4    7.58    0.78
  -9  -3  -4   46.98    2.79
   9  -3   4   47.64    3.45
   9   3   4   47.22    3.75
 -11  -3  -4   22.97    1.87
  11  -3   4   23.72    2.51
  11   3   4   24.38    2.72
  13  -3   4    1.03    0.82
  13   3   4    0.66    0.73
 -12  -4   4    0.44    0.48
  12  -4  -4    0.40    0.82
  12   4  -4   -0.53    0.78
 -10  -4   4    1.46    0.62
  10  -4  -4    2.12    0.88
  10   4  -4    0.71    0.81
  -8  -4   4   20.32    1.73
   8  -4  -4   16.82    2.53
   8   4  -4   15.42    2.68
  -6  -4   4    5.52    1.06
   6  -4  -4    3.54    1.28
  -6   4   4    4.84    0.52
  -4  -4   4   15.85    2.46
  -4  -4   4   14.44    1.42
   4  -4  -4   13.59    2.02
   4  -4  -4   13.94    1.01
  -4   4   4   12.75    0.98
  -4   4   4   16.45    1.68
   4   4  -4   14.67    2.41
   4   4  -4   13.84    1.33
   2  -4  -4    4.82    1.30
  -2  -4   4    4.03    0.92
  -2  -4   4    5.46    1.56
   2  -4  -4    4.86    0.75
   2   4  -4    6.56    1.57
  -2   4   4    5.05    0.82
  -2   4   4    5.50    1.18
   0  -4  -4    5.02    0.92
   0  -4   4    4.58    0.85
   0   4  -4    4.66    1.25
   0   4  -4    6.81    1.15
   0   4   4    5.18    1.22
   0   4   4    3.61    1.11
   0   4   4    5.19    0.94
   0   4  -4    2.67    1.02
  -2  -4  -4   11.90    1.87
   2  -4   4    9.37    1.02
  -2  -4  -4    7.87    1.08
   2  -4   4   12.18    1.85
  -2   4  -4   10.77    1.77
  -2   4  -4    9.59    0.99
   2   4   4   10.41    2.05
  -4  -4  -4    6.48    1.48
  -4  -4  -4    5.66    1.01
   4  -4   4    6.63    1.46
   4  -4   4    6.60    0.93
  -4   4  -4    4.21    1.08
   4   4   4    9.38    2.05
   4   4   4    7.05    1.23
  -4   4  -4    6.84    0.96
  -6  -4  -4    0.38    0.45
   6  -4   4   -0.16    0.46
   6  -4   4   -0.25    0.18
   6   4   4    0.02    0.69
  -6   4  -4    0.50    0.36
   8  -4   4   18.80    2.53
   8  -4   4   17.05    1.00
  -8  -4  -4   20.71    1.75
   8   4   4   16.67    2.73
  -8   4  -4   16.10    1.15
 -10  -4  -4    1.08    0.64
  10  -4   4    1.58    0.98
  10   4   4   -0.84    0.59
 -12  -4  -4    1.87    0.71
  12  -4   4    1.44    0.89
  12   4   4    1.69    1.02
  13  -5  -4    0.27    0.61
 -13  -5   4   -0.36    0.45
  13   5  -4   -0.08    0.70
 -11  -5   4    0.47    0.50
  11  -5  -4    1.27    1.03
  11   5  -4   -0.32    0.71
   9  -5  -4    7.79    1.69
  -9  -5   4    5.89    1.13
   9   5  -4    5.07    1.64
  -7  -5   4    7.64    1.36
   7  -5  -4    6.44    1.62
   7   5  -4    6.39    1.79
  -7   5   4    5.01    0.50
   5  -5  -4   41.48    3.32
   5  -5  -4   43.96    2.16
  -5  -5   4   41.42    2.69
   5   5  -4   42.47    3.73
  -5   5   4   42.37    2.13
  -3  -5   4   83.99    4.29
   3  -5  -4   82.81    4.96
   3  -5  -4   86.34    3.83
   3   5  -4   91.22    5.52
  -3   5   4   86.01    3.87
  -1  -5   4   17.00    1.58
   1  -5  -4   16.86    1.42
   1   5  -4   16.94    2.51
  -1   5   4   14.30    1.95
  -1   5   4   14.39    1.66
   1   5  -4   16.11    1.46
  -1   5   4   13.56    2.08
   1  -5   4    0.29    0.51
  -1  -5  -4    0.40    0.45
   1   5   4    0.28    0.38
  -1   5  -4    0.43    0.35
  -1   5  -4    0.03    0.53
   1   5   4    0.62    0.36
  -1   5  -4    0.15    0.71
   1   5   4    0.84    0.95
   3  -5   4   11.59    1.18
  -3  -5  -4   11.82    2.09
   3  -5   4   13.47    2.19
  -3  -5  -4   12.36    1.66
  -3   5  -4   10.93    1.09
   3   5   4   11.68    2.24
   5  -5   4    0.05    0.22
   5  -5   4    0.93    0.66
  -5  -5  -4    0.89    0.62
   5   5   4   -0.37    0.85
  -5   5  -4   -0.17    0.26
   7  -5   4    0.15    0.58
  -7  -5  -4   -0.01    0.39
   7  -5   4    0.35    0.29
   7   5   4    0.16    0.88
  -7   5  -4    0.22    0.38
   9  -5   4    0.05    0.21
  -9  -5  -4    0.13    0.44
   9  -5   4   -0.74    0.58
   9   5   4    0.48    0.98
  -9   5  -4   -0.04    0.25
  11  -5   4    3.79    1.22
 -11  -5  -4    4.32    1.03
  11   5   4    3.27    1.38
  13  -5   4    4.30    1.22
 -13  -5  -4    4.57    1.04
  13   5   4    2.51    1.28
  12  -6  -4    0.75    0.82
 -12  -6   4    1.47    0.63
  12   6  -4    1.45    1.04
 -10  -6   4    0.60    0.51
  10  -6  -4    1.11    0.91
  10   6  -4    1.42    0.98
  -8  -6   4    5.36    1.10
   8  -6  -4    3.42    1.28
   8   6  -4    4.17    1.47
  -8   6   4    4.10    0.54
   6  -6  -4    7.08    1.71
  -6  -6   4    4.68    1.13
   6  -6  -4    6.10    0.84
   6   6  -4    5.60    1.65
  -6   6   4    7.20    0.94
   4  -6  -4    2.00    0.60
  -4  -6   4    1.29    0.61
   4  -6  -4    1.22    0.85
   4   6  -4    2.20    1.03
  -4   6   4    2.88    0.68
   2  -6  -4   34.11    2.19
  -2  -6   4   32.53    2.41
  -2   6   4   38.71    2.30
   2   6  -4   37.75    3.29
  -2   6   4   34.58    3.26
   0  -6  -4   32.83    2.20
   0  -6   4   29.77    2.22
   0   6   4   37.70    3.82
   0   6  -4   31.17    3.04
   2  -6   4   17.33    1.51
  -2  -6  -4   14.78    1.54
  -2   6  -4   16.12    2.44
  -4  -6  -4    4.88    1.09
   4  -6   4    4.08    1.25
   4  -6   4    5.81    0.99
  -4   6  -4    4.32    0.79
   4   6   4    7.02    1.80
   6  -6   4   11.57    2.18
  -6  -6  -4    8.97    1.38
   6  -6   4   10.93    1.05
  -6   6  -4   12.06    1.13
   6   6   4   12.88    2.60
   8  -6   4   13.22    0.96
  -8  -6  -4   10.32    1.54
   8  -6   4   13.22    2.27
  -8   6  -4   10.78    1.10
   8   6   4   13.21    2.50
  10  -6   4   10.11    2.01
 -10  -6  -4   12.16    1.82
  10   6   4    8.95    2.31
  12  -6   4    0.65    0.72
  12   6   4    0.33    0.79
   9  -7  -4    5.39    1.92
  -9  -7   4    3.94    0.99
   9   7  -4    4.69    2.01
  -7  -7   4    1.68    0.73
   7  -7  -4    1.35    0.46
   7  -7  -4    1.01    0.98
  -7   7   4    0.61    0.35
   7   7  -4    0.62    1.10
   5  -7  -4    2.90    0.71
   5  -7  -4    1.41    1.10
  -5  -7   4    1.90    0.81
   5   7  -4    1.23    1.01
  -5   7   4    3.57    0.66
  -3  -7   4   11.16    1.62
   3  -7  -4    8.80    1.26
   3   7  -4   12.40    2.33
  -3   7   4   13.14    2.53
  -1  -7   4    0.68    0.52
   1  -7  -4    0.47    0.50
   1   7  -4    0.20    0.77
  -1   7   4    0.18    0.66
   1  -7   4    9.83    1.49
  -1  -7  -4    6.47    1.18
   1   7   4    8.85    2.11
  -1   7  -4   10.64    2.32
   3  -7   4    6.95    1.21
  -3   7  -4    8.61    1.96
   3   7   4    5.28    1.72
   5  -7   4    1.91    0.64
   5  -7   4    3.22    1.26
  -5  -7  -4    0.61    0.55
   5   7   4    0.42    1.03
   7  -7   4    6.68    0.93
   7  -7   4    6.19    1.62
  -7  -7  -4    9.28    1.54
  -7   7  -4    5.90    0.93
   7   7   4    5.31    1.71
   9  -7   4   -0.77    0.76
   9  -7   4    0.15    0.23
  -9  -7  -4    0.43    0.46
  -9   7  -4    0.86    0.39
   9   7   4    0.37    0.99
   8  -8  -4    3.11    1.17
   8   8  -4    2.65    1.30
  -6  -8   4    3.82    1.04
   6  -8  -4    3.54    1.41
   6  -8  -4    5.15    0.90
   6   8  -4    4.01    1.57
  -4  -8   4    2.20    0.84
   4  -8  -4    3.59    0.84
   4   8  -4    0.62    1.03
  -4   8   4    2.35    1.37
   2  -8  -4    1.36    0.63
  -2  -8   4    2.04    0.81
   2   8  -4    0.67    0.98
  -2   8   4    1.78    1.15
   0  -8  -4    0.14    0.43
   0  -8   4    0.23    0.46
   0   8  -4    0.48    0.81
   0   8   4    0.33    0.80
  -2  -8  -4   18.79    1.79
   2  -8   4   15.76    1.60
  -2   8  -4   17.44    2.90
   2   8   4   20.37    3.33
  -4  -8  -4   59.44    3.64
   4  -8   4   60.00    3.25
  -4   8  -4   65.01    4.73
   4   8   4   59.99    4.81
   6  -8   4   18.22    1.47
  -6  -8  -4   16.47    1.79
   6   8   4   17.13    3.07
   8  -8   4   -0.40    0.62
  -8  -8  -4    0.34    0.50
   8  -8   4    0.92    0.45
   7  -9  -4    5.27    0.86
  -7  -9   4    4.17    1.04
   7  -9  -4    5.86    1.48
   7   9  -4    4.60    1.87
  -5  -9   4   -0.07    0.65
   5  -9  -4    0.49    0.46
   5   9  -4   -0.32    0.90
  -5   9   4    0.49    1.12
  -3  -9   4    0.61    0.71
   3  -9  -4    1.63    0.68
  -3   9   4    2.81    1.43
   3   9  -4    1.70    1.26
   1  -9  -4    0.48    0.53
  -1  -9   4    2.43    0.84
  -1   9   4    1.36    1.28
   1   9  -4    0.66    1.25
   1  -9   4    7.55    1.33
  -1  -9  -4    9.36    1.51
   1   9   4    8.10    1.96
  -1   9  -4   12.06    2.35
   3  -9   4    5.72    1.08
  -3  -9  -4    1.93    0.87
  -3   9  -4    4.79    1.70
   3   9   4    1.75    1.20
   5  -9   4   18.76    1.58
  -5  -9  -4   14.20    1.99
  -5   9  -4   13.72    2.54
   7  -9   4   14.42    1.32
  -7  -9  -4   15.34    2.13
   7   9   4   17.80    3.00
  -7   9  -4   18.23    2.98
   2 -10  -4    1.38    0.60
  -2 -10   4    0.76    0.61
   2  10  -4    0.16    0.92
  -2  10   4    0.71    1.13
   0 -10  -4    3.49    1.11
   0 -10   4    4.70    1.04
   0  10   4    2.64    1.54
   0  10  -4    4.27    1.48
   2 -10   4    6.81    1.30
  -2 -10  -4    4.47    0.99
   2  10   4    5.00    1.62
  -2  10  -4    4.76    1.58
  14   0  -5    0.70    0.98
  12   0  -5    0.03    0.82
  10   0  -5    0.23    0.76
 -10   0   5    0.02    0.20
  10   0  -5    0.14    0.22
  -8   0   5    0.04    0.15
   8   0  -5    0.07    0.21
   8   0  -5   -0.26    0.51
   6   0  -5    0.45    0.40
   6   0  -5    0.03    0.22
  -6   0   5   -0.13    0.19
  -4   0   5   -0.19    0.35
   4   0  -5    0.18    0.28
  -4   0   5   -0.27    0.16
   4   0  -5   -0.58    0.22
   2   0  -5    0.18    0.33
  -2   0   5    0.11    0.32
  -2   0   5   -0.14    0.34
   0   0  -5    0.02    0.11
   0   0   5   -0.06    0.33
   0   0  -5    0.02    0.31
   0   0   5    0.07    0.14
  -2   0  -5    0.06    0.27
  -2   0  -5    0.38    0.21
   2   0   5    0.12    0.20
   2   0   5    0.19    0.36
   4   0   5    0.50    0.36
   4   0   5    0.14    0.31
   4   0   5    0.02    0.17
  -4   0  -5    0.34    0.37
   6   0   5   -0.11    0.33
  -6   0  -5    0.13    0.34
   6   0   5    0.07    0.41
   6   0   5    0.16    0.21
   8   0   5    0.15    0.41
   8   0   5    0.25    0.67
   8   0   5    0.39    0.20
  -8   0  -5    0.14    0.48
  10   0   5   -0.99    0.47
  10   0   5    0.31    0.34
  12   0   5    0.62    0.75
  12   0   5    0.27    0.27
  12   0   5    0.14    0.40
  14   0   5   -0.43    0.40
  14   0   5    0.51    1.48
  14   0   5    1.13    0.35
 -13  -1   5    5.74    0.74
  13  -1  -5    4.56    1.44
  13   1  -5    5.85    0.83
  13   1  -5    5.39    1.65
  11  -1  -5   19.98    2.92
 -11  -1   5   19.62    1.32
  11   1  -5   18.74    2.84
  11   1  -5   20.97    1.35
  -9  -1   5   39.83    2.11
   9  -1  -5   46.57    3.45
   9   1  -5   40.68    2.12
   9   1  -5   37.16    3.23
  -7  -1   5    9.43    0.89
   7  -1  -5   10.12    1.77
  -7  -1   5   10.20    1.78
  -7   1   5   10.71    1.76
   7   1  -5   14.64    2.19
   7   1  -5    8.85    0.84
  -5  -1   5   24.51    2.15
   5  -1  -5   21.18    1.16
   5  -1  -5   18.70    1.82
  -5  -1   5   21.53    1.38
   5   1  -5   20.23    1.34
  -5   1   5   20.75    1.81
   5   1  -5   20.96    2.03
  -5   1   5   19.20    1.04
   3  -1  -5   90.61    4.30
  -3  -1   5   90.99    3.93
   3  -1  -5   98.16    3.79
  -3  -1   5   99.32    4.66
  -3   1   5   88.57    3.80
  -3   1   5   98.84    4.35
   3   1  -5   96.76    4.58
  -1  -1   5   21.17    1.67
   1  -1  -5   23.37    1.39
  -1  -1   5   22.95    1.47
   1   1  -5   21.53    1.61
   1   1  -5   24.53    1.48
  -1   1   5   23.64    1.35
  -1   1   5   22.94    1.42
   1  -1   5    4.84    0.71
   1  -1   5    6.82    1.02
  -1  -1  -5    6.27    0.61
   1   1   5    7.94    0.96
   1   1   5    5.92    0.79
   1   1   5    3.88    0.63
  -1   1  -5    6.55    0.92
  -1   1  -5    5.76    0.74
  -3  -1  -5   36.15    2.09
   3  -1   5   34.65    2.02
   3  -1   5   32.03    1.93
   3   1   5   35.85    1.96
  -3   1  -5   37.48    2.05
   3   1   5   33.56    2.33
  -3   1  -5   34.52    1.99
   5  -1   5   36.04    2.04
   5  -1   5   34.22    2.27
   5   1   5   37.50    2.44
  -5   1  -5   30.35    1.83
  -5   1  -5   33.53    2.27
  -7  -1  -5   17.16    1.79
   7  -1   5   19.63    1.85
   7  -1   5   16.30    1.32
   7  -1   5   15.96    1.12
   7   1   5   15.70    1.23
  -7   1  -5   15.42    1.71
   7   1   5   17.19    1.83
   7   1   5   16.99    1.39
   9  -1   5    4.58    0.67
   9  -1   5    6.94    1.03
   9   1   5    4.72    1.60
   9   1   5    6.52    1.00
   9   1   5    6.08    1.06
  11  -1   5   11.75    1.06
  11  -1   5   10.29    0.84
  11  -1   5   14.46    2.23
  11   1   5   13.50    2.31
  11   1   5   12.68    1.24
  11   1   5   11.33    1.01
  13  -1   5   14.29    2.35
  13  -1   5   11.53    0.79
  13  -1   5   11.88    0.92
  13   1   5   13.23    1.55
  13   1   5   12.12    2.24
  13   1   5    9.44    1.06
 -14  -2   5    1.69    0.54
  14  -2  -5    0.66    0.69
  14   2  -5    0.85    0.94
  12  -2  -5    4.15    1.42
 -12  -2   5    4.26    0.78
  12   2  -5    3.66    1.39
  10  -2  -5    2.27    0.77
 -10  -2   5    2.84    0.69
  10   2  -5    1.35    0.49
  10   2  -5    2.26    1.07
   8  -2  -5   45.26    3.43
  -8  -2   5   48.85    2.60
   8   2  -5   48.32    3.72
   8   2  -5   50.69    2.60
  -6  -2   5    8.70    0.96
   6  -2  -5    9.08    1.63
  -6  -2   5   11.45    1.98
  -6   2   5   14.18    1.97
   6   2  -5    9.82    1.79
  -4  -2   5    6.38    0.98
  -4  -2   5    6.79    1.39
   4  -2  -5    9.00    1.53
   4   2  -5    6.15    1.29
  -4   2   5    6.74    0.69
  -4   2   5    6.34    0.55
  -4   2   5    6.05    1.13
   4   2  -5    6.42    0.92
  -2  -2   5   59.80    3.48
   2  -2  -5   59.89    3.10
  -2  -2   5   54.18    2.84
  -2   2   5   59.42    2.91
  -2   2   5   58.04    2.59
   2   2  -5   58.33    2.83
  -2   2   5   62.59    3.09
   2   2  -5   56.25    3.38
   0  -2   5  229.12    8.59
   0  -2   5  220.98    8.97
   0  -2  -5  225.76    8.46
   0   2  -5  228.13    8.56
   0   2   5  234.67    8.63
   0   2   5  230.61    8.45
   0   2  -5  226.56    8.89
  -2  -2  -5   91.66    4.13
   2  -2   5   86.99    4.03
  -2  -2  -5   85.77    3.86
   2  -2   5   91.05    3.86
   2   2   5   79.54    4.19
   2   2   5   87.33    3.86
  -2   2  -5   90.16    3.90
  -4  -2  -5   43.32    2.43
   4  -2   5   45.53    2.69
   4  -2   5   45.99    2.30
   4   2   5   42.30    2.39
  -4   2  -5   41.01    2.34
  -4   2  -5   47.29    2.77
   4   2   5   43.44    2.91
   6  -2   5    3.64    1.00
  -6  -2  -5    3.61    1.09
   6  -2   5    4.57    0.75
  -6  -2  -5    4.84    0.97
  -6   2  -5    8.01    1.48
   6   2   5    4.55    0.82
   6   2   5    4.79    1.20
  -6   2  -5    4.71    0.79
   8  -2   5    7.46    1.54
  -8  -2  -5    9.14    1.32
   8  -2   5    8.54    0.73
   8  -2   5    7.84    0.83
   8   2   5    7.68    1.66
  10  -2   5    1.31    0.90
  10  -2   5    0.96    0.33
  10  -2   5    1.50    0.33
  10   2   5    2.22    1.01
  12  -2   5    6.12    1.54
  12   2   5    2.66    1.13
  12   2   5    3.84    0.92
  14  -2   5    6.01    1.53
  14   2   5    7.00    1.18
  14   2   5    8.17    1.90
  13  -3  -5    0.98    1.06
 -13  -3   5    1.02    0.47
  13   3  -5    0.23    0.88
  11  -3  -5    0.98    0.64
 -11  -3   5    3.75    0.79
  11   3  -5    7.07    2.06
  -9  -3   5    5.85    1.08
   9  -3  -5    5.53    1.39
   9   3  -5    6.22    1.89
  -7  -3   5   93.49    4.26
   7   3  -5   94.69    4.27
   7   3  -5   72.97    6.31
  -5  -3   5   43.17    2.55
  -5  -3   5   42.11    3.33
   5  -3  -5   42.67    3.03
   5   3  -5   40.13    3.32
  -5   3   5   43.77    2.01
  -5   3   5   44.27    1.89
  -5   3   5   47.32    3.09
   3  -3  -5  115.54    5.52
   3  -3  -5  119.21    4.60
  -3  -3   5  114.50    5.02
  -3  -3   5  109.39    5.91
  -3   3   5  119.90    5.47
   3   3  -5  116.68    5.99
   3   3  -5  120.42    5.04
  -3   3   5  107.32    4.50
   1  -3  -5   33.59    1.85
  -1  -3   5   29.22    1.92
  -1  -3   5   27.40    2.40
   1  -3  -5   27.34    2.16
  -1   3   5   31.51    1.78
   1   3  -5   32.79    2.49
  -1   3   5   32.24    2.15
   1   3  -5   29.12    1.92
   1  -3   5   54.40    2.80
  -1  -3  -5   56.00    2.84
   1   3   5   59.48    2.86
  -1   3  -5   54.40    3.22
   1   3   5   54.95    3.09
   1   3   5   53.26    3.34
  -1   3  -5   52.83    3.20
  -1   3  -5   55.95    2.82
   3  -3   5    1.20    0.62
   3  -3   5    1.85    0.49
  -3  -3  -5    1.71    0.64
  -3  -3  -5    0.84    0.44
  -3   3  -5    1.69    0.70
  -3   3  -5    1.92    0.49
   3   3   5    1.83    0.56
   3   3   5    1.67    0.88
   5  -3   5   10.44    1.62
   5  -3   5    9.45    0.94
  -5  -3  -5   14.00    2.03
  -5  -3  -5    9.47    1.31
   5   3   5   10.19    1.11
  -5   3  -5   11.92    1.38
   5   3   5    9.37    1.82
   7  -3   5    2.36    0.53
   7  -3   5    3.44    1.11
  -7  -3  -5    2.15    0.79
  -7  -3  -5    3.10    1.02
   7   3   5    2.17    0.66
  -7   3  -5    2.93    0.64
   7   3   5    2.17    1.01
   9  -3   5   42.74    1.95
   9  -3   5   44.69    1.99
   9  -3   5   43.63    3.28
   9   3   5   48.70    3.68
  11  -3   5    4.47    1.32
 -11  -3  -5    2.21    0.63
  11   3   5    2.99    1.20
  13  -3   5    6.72    1.65
  13   3   5    7.48    1.69
  13   3   5   10.13    1.47
 -12  -4   5    1.42    0.50
  10  -4  -5   -0.15    0.53
 -10  -4   5    0.20    0.46
  10   4  -5    0.42    0.87
   8  -4  -5   44.03    3.44
  -8  -4   5   43.62    2.72
   8   4  -5   47.51    3.99
  -6  -4   5   18.11    1.58
  -6   4   5   13.58    0.95
   6   4  -5   16.87    2.78
  -6   4   5   14.85    0.89
   4  -4  -5  332.06   13.32
  -4  -4   5  343.75   12.53
  -4  -4   5  301.22   13.65
   4  -4  -5  335.85   11.80
  -4   4   5  327.36   11.76
   4   4  -5  333.83   12.46
  -4   4   5  335.03   13.18
   4   4  -5  321.39   13.82
   2  -4  -5   27.42    1.74
  -2  -4   5   31.71    2.08
   2  -4  -5   28.24    2.37
  -2   4   5   28.23    2.24
   2   4  -5   27.46    2.63
   2   4  -5   28.46    1.98
  -2   4   5   28.09    1.74
   0  -4   5    0.98    0.53
   0  -4  -5    0.03    0.24
   0   4   5    0.02    0.52
   0   4  -5    0.48    0.51
   0   4  -5    0.47    0.63
   0   4   5   -0.02    0.20
   0   4  -5   -0.08    0.20
   0   4   5    0.57    0.39
   2  -4   5   43.51    2.40
  -2  -4  -5   36.68    2.37
  -2  -4  -5   41.78    2.87
  -2   4  -5   39.84    2.90
   2   4   5   41.54    2.46
  -2   4  -5   40.37    2.34
   2   4   5   41.57    3.25
   4  -4   5   30.80    2.48
  -4  -4  -5   28.64    2.04
   4  -4   5   26.47    1.75
  -4  -4  -5   33.30    3.01
   4   4   5   29.16    2.80
  -4   4  -5   27.12    1.80
  -4   4  -5   25.10    2.28
   4   4   5   30.31    2.04
  -6  -4  -5   19.06    2.92
  -6  -4  -5   20.02    1.73
   6  -4   5   18.49    1.99
   6  -4   5   17.56    1.25
  -6   4  -5   16.69    1.41
   6   4   5   21.14    2.40
   8  -4   5   23.75    1.33
  -8  -4  -5   22.79    1.95
   8  -4   5   26.14    2.38
  -8   4  -5   20.77    1.44
   8   4   5   23.98    2.67
 -10  -4  -5    7.77    1.38
  10  -4   5    9.38    1.95
  10   4   5    6.68    1.69
 -12  -4  -5   26.81    2.09
  12  -4   5   24.89    2.55
  12   4   5   28.39    3.00
 -11  -5   5    1.61    0.73
  11  -5  -5    1.72    0.84
  11   5  -5    2.98    1.34
   9  -5  -5    0.32    0.66
  -9  -5   5    1.01    0.59
   9   5  -5    0.55    0.78
   7  -5  -5   62.69    4.17
  -7  -5   5   65.47    3.53
   7   5  -5   65.32    4.79
  -7   5   5   55.39    2.46
   5  -5  -5   44.79    2.15
  -5  -5   5   43.89    2.76
   5  -5  -5   40.86    3.22
   5   5  -5   43.79    3.68
  -5   5   5   36.12    2.03
  -3  -5   5   32.73    2.34
   3  -5  -5   31.05    1.94
   3  -5  -5   29.71    2.73
  -3   5   5   35.32    2.00
   3   5  -5   30.88    2.96
   1  -5  -5   17.10    1.46
  -1  -5   5   16.28    1.54
   1   5  -5   18.26    1.53
   1   5  -5   19.54    2.22
  -1   5   5   17.35    1.45
  -1   5   5   19.45    2.78
  -1   5   5   14.62    1.64
  -1  -5  -5   13.60    1.38
   1  -5   5   15.31    1.45
  -1   5  -5   15.74    2.28
   1   5   5   14.95    2.14
   1   5   5   13.82    1.34
  -1   5  -5   13.57    1.30
   1   5   5   13.74    2.34
  -1   5  -5   15.48    2.28
   3  -5   5   12.60    1.24
  -3  -5  -5   13.10    1.78
   3  -5   5   11.57    1.93
  -3  -5  -5    9.40    1.68
  -3   5  -5   13.25    1.28
   3   5   5   13.55    2.41
   5  -5   5   -0.12    0.21
  -5  -5  -5    0.22    0.41
   5  -5   5    0.96    0.74
  -5   5  -5   -0.27    0.25
   5   5   5   -0.27    0.83
  -7  -5  -5    0.00    0.43
   7  -5   5    0.29    0.27
   7  -5   5    0.33    0.65
   7   5   5   -0.10    0.92
  -7   5  -5    0.14    0.27
   9  -5   5   53.30    2.30
  -9  -5  -5   52.59    3.25
   9  -5   5   53.75    3.81
   9   5   5   54.74    4.32
  -9   5  -5   51.79    2.54
 -11  -5  -5    4.40    1.03
  11  -5   5    5.06    1.40
  11   5   5    2.36    1.23
 -12  -6   5    0.28    0.51
  12  -6  -5    1.70    1.01
  12   6  -5    0.33    0.80
 -10  -6   5   -0.31    0.44
  10  -6  -5    1.19    0.71
  10   6  -5    0.76    1.14
  -8  -6   5   43.62    2.87
   8  -6  -5   40.50    3.45
   8   6  -5   45.76    4.08
  -6  -6   5    1.52    0.66
   6  -6  -5    1.32    0.43
   6  -6  -5    0.36    0.64
  -6   6   5    1.94    0.48
   6   6  -5    1.97    1.20
   4  -6  -5   41.71    3.41
  -4  -6   5   44.09    2.85
   4  -6  -5   40.02    2.32
   4   6  -5   38.24    3.58
  -4   6   5   42.98    2.36
  -2  -6   5   26.48    2.44
   2  -6  -5   24.98    1.84
  -2   6   5   26.37    2.83
  -2   6   5   27.81    1.91
   2   6  -5   29.66    2.95
   0  -6  -5   75.42    3.93
   0   6   5   77.31    5.16
   0   6  -5   88.43    5.24
  -2  -6  -5    8.35    1.38
   2  -6   5   10.51    1.50
  -2   6  -5    9.71    2.17
  -4  -6  -5    3.05    0.89
   4  -6   5    4.41    0.95
   4  -6   5    4.99    1.38
   4   6   5    2.66    1.16
  -4   6  -5    4.24    0.88
   6  -6   5   -0.07    0.32
   6  -6   5   -0.09    0.71
  -6  -6  -5    0.35    0.53
  -6   6  -5   -0.11    0.31
   6   6   5    1.76    1.22
   8  -6   5   10.72    0.90
   8  -6   5   13.27    2.21
  -8  -6  -5   10.27    1.53
  -8   6  -5   11.39    1.37
   8   6   5   12.33    2.42
  10  -6   5    4.08    1.31
 -10  -6  -5    2.59    0.85
  10  -6   5    3.55    0.46
  10   6   5    2.65    1.46
 -10   6  -5    2.19    0.46
 -12  -6  -5    7.39    1.43
  12   6   5    5.72    1.69
  -9  -7   5   32.37    2.45
   9  -7  -5   28.86    3.03
   9   7  -5   28.17    3.94
   7  -7  -5    0.04    0.83
  -7  -7   5    1.08    0.69
   7   7  -5    0.50    1.03
  -7   7   5    0.16    0.27
   5  -7  -5    0.12    0.75
  -5  -7   5    0.49    0.44
   5  -7  -5    0.15    0.39
   5   7  -5    0.09    0.75
  -5   7   5    0.47    0.31
   3  -7  -5   57.98    3.36
  -3  -7   5   60.97    3.55
  -3   7   5   59.86    4.50
   3   7  -5   56.17    4.44
   1  -7  -5    4.65    0.98
  -1  -7   5    7.31    1.43
   1   7  -5    5.68    1.55
  -1   7   5    4.76    1.66
  -1  -7  -5   18.62    1.77
   1  -7   5   17.23    1.73
  -1   7  -5   24.20    2.73
   1   7   5   24.32    3.48
   3  -7   5    0.80    0.45
  -3  -7  -5   -0.27    0.33
   3   7   5   -0.14    0.94
  -3   7  -5   -0.51    0.74
  -5  -7  -5   10.52    1.50
   5   7   5   12.32    2.53
   7  -7   5   31.69    3.08
  -7  -7  -5   35.92    2.61
   7  -7   5   31.05    1.92
   7   7   5   38.77    3.69
   9  -7   5   -0.01    0.26
   9  -7   5    1.13    0.83
  -9  -7  -5    0.34    0.50
   9   7   5   -0.47    0.88
  -8  -8   5    3.97    1.11
   8  -8  -5    5.23    1.54
  -8   8   5    5.66    0.91
   8   8  -5    6.34    1.89
   6  -8  -5    1.94    0.99
  -6  -8   5    1.51    0.75
   6  -8  -5    1.26    0.55
   6   8  -5    0.19    0.84
   4  -8  -5    1.81    0.67
  -4  -8   5    1.06    0.61
   4   8  -5    3.96    1.49
  -4   8   5    2.45    1.30
   2  -8  -5    9.41    1.44
  -2  -8   5    9.91    1.54
   2   8  -5   10.26    2.08
  -2   8   5    8.05    2.05
   0  -8   5   11.21    1.59
   0  -8  -5   10.73    1.49
   0   8   5   14.75    2.88
   0   8  -5   11.55    2.35
  -2  -8  -5    0.08    0.32
   2  -8   5    1.71    0.72
   2   8   5   -0.04    1.01
  -2   8  -5   -1.05    0.51
  -4  -8  -5    3.12    0.95
   4  -8   5    3.18    0.82
  -4   8  -5    2.26    1.06
   4   8   5    3.32    1.49
   6  -8   5    2.77    0.75
  -6  -8  -5    2.52    0.86
   6   8   5    2.53    1.23
  -8  -8  -5    5.21    1.30
   8  -8   5    3.34    1.16
   7  -9  -5    5.77    1.59
  -7  -9   5    3.56    1.05
   7  -9  -5    2.76    0.69
   7   9  -5    0.58    1.05
   5  -9  -5    6.46    1.07
  -5  -9   5    6.85    1.45
   5   9  -5    4.76    1.70
  -5   9   5    5.20    1.73
  -3  -9   5    0.30    0.47
   3  -9  -5   -0.22    0.34
  -3   9   5    1.60    1.12
   3   9  -5   -0.11    0.78
   1  -9  -5    2.62    0.84
  -1  -9   5    1.69    0.72
  -1   9   5    0.03    1.00
   1   9  -5    2.27    1.38
   1  -9   5    2.24    0.79
  -1  -9  -5    1.95    0.79
   1   9   5    0.28    0.92
  -1   9  -5   -0.47    0.84
  -3  -9  -5    7.84    1.47
   3  -9   5    6.63    1.15
  -3   9  -5    4.51    1.56
   3   9   5    5.18    1.62
  -5  -9  -5    6.01    1.32
   5  -9   5    4.60    0.89
  -5   9  -5    3.46    1.37
   7  -9   5    0.72    0.42
  -7  -9  -5   -0.20    0.43
   7   9   5    2.19    1.07
  -7   9  -5   -0.20    0.85
  -2 -10   5    4.06    1.03
   2 -10  -5    5.93    1.16
   2  10  -5    3.16    1.36
  -2  10   5    5.66    1.80
   0 -10   5   10.97    1.60
   0 -10  -5   11.59    1.68
   0  10  -5   10.26    2.26
   0  10   5   12.75    2.67
  -2 -10  -5   19.28    1.85
   2 -10   5   19.98    2.10
   2  10   5   12.45    2.60
  -2  10  -5   18.94    3.11
  14   0  -6    9.04    1.99
  12   0  -6    5.38    1.51
  10   0  -6    3.52    1.26
  10   0  -6    3.54    0.57
 -10   0   6    3.44    0.49
  -8   0   6   13.33    0.92
   8   0  -6   14.96    1.05
  -6   0   6    5.17    0.72
   6   0  -6    5.31    0.75
   6   0  -6    5.63    1.30
  -6   0   6    4.17    1.06
  -4   0   6    0.41    0.27
  -4   0   6    0.27    0.43
   4   0  -6    0.05    0.26
   4   0  -6    0.43    0.47
  -2   0   6  634.98   22.21
  -2   0   6  635.96   22.15
   2   0  -6  637.13   22.13
   0   0  -6  417.04   14.95
   0   0  -6  425.22   14.14
   0   0   6  458.86   15.11
   0   0   6  376.85   14.19
   2   0   6  144.12    5.87
   2   0   6  138.61    5.22
  -2   0  -6  145.00    5.29
  -2   0  -6  147.04    5.82
  -4   0  -6    8.71    1.17
   4   0   6    9.15    0.99
   4   0   6   10.29    1.27
   6   0   6   18.77    1.72
   6   0   6   18.57    1.37
   6   0   6   22.95    1.64
   8   0   6   17.85    1.87
   8   0   6   15.94    1.41
   8   0   6   18.19    1.31
  -8   0  -6   15.38    1.67
  10   0   6    3.13    0.62
  10   0   6    3.64    1.13
  10   0   6    3.17    0.82
  12   0   6   -0.40    0.59
  12   0   6   -0.40    0.40
  14   0   6   21.50    1.62
  13  -1  -6    8.43    2.14
 -13  -1   6   10.97    0.90
  13   1  -6   10.93    2.67
  13   1  -6    8.56    0.87
 -11  -1   6    2.57    0.56
  11  -1  -6    3.89    1.35
  11   1  -6    2.88    0.58
  11   1  -6    3.13    1.25
  -9  -1   6   11.24    0.95
   9  -1  -6    8.10    1.81
   9   1  -6   10.06    0.96
   9   1  -6   11.41    2.06
   7  -1  -6    6.73    0.74
  -7  -1   6    5.40    1.48
  -7  -1   6    6.89    0.92
   7  -1  -6    4.96    1.31
   7   1  -6    6.23    1.47
  -7   1   6    5.09    1.14
  -7   1   6    4.09    0.42
   7   1  -6    5.42    0.87
   5  -1  -6    7.30    0.72
  -5  -1   6    8.57    1.07
  -5  -1   6    8.50    1.55
   5  -1  -6    9.10    1.51
  -5   1   6    7.94    0.70
   5   1  -6   10.21    1.68
   5   1  -6    7.86    0.82
  -5   1   6    8.61    1.45
   3  -1  -6  260.21   10.24
   3  -1  -6  274.73    9.80
  -3  -1   6  266.80    9.95
  -3  -1   6  270.41   10.62
   3   1  -6  275.65   10.55
   3   1  -6  277.14    9.96
  -3   1   6  253.62    9.84
  -3   1   6  281.87   10.32
  -1  -1   6   28.62    1.90
   1  -1  -6   29.28    1.71
   1  -1  -6   29.57    1.62
  -1   1   6   29.84    1.59
  -1   1   6   28.99    1.78
   1   1  -6   30.68    1.85
   1   1  -6   31.99    1.84
   1  -1   6  553.49   19.53
  -1   1  -6  549.62   19.06
   1   1   6  535.01   18.99
   1   1   6  570.01   19.41
  -1   1  -6  549.40   19.03
  -1   1  -6  556.38   19.49
   3  -1   6    4.54    0.76
   3  -1   6    4.30    0.96
  -3  -1  -6    4.89    0.83
   3   1   6    3.51    0.71
  -3   1  -6    4.51    0.78
  -3   1  -6    4.41    0.77
   3   1   6    5.37    0.88
   3   1   6    4.79    0.88
   5  -1   6   77.57    3.80
   5  -1   6   72.58    3.60
  -5  -1  -6   79.95    3.99
  -5   1  -6   69.00    3.43
   5   1   6   81.26    3.98
   5   1   6   77.16    3.63
   5   1   6   77.31    3.53
   7  -1   6   59.58    3.64
   7  -1   6   65.32    3.26
   7  -1   6   64.77    2.95
   7   1   6   65.06    3.14
  -7   1  -6   63.97    3.72
   7   1   6   63.47    3.28
   7   1   6   66.20    3.84
   9  -1   6   14.85    1.33
   9  -1   6   12.35    1.01
   9   1   6   13.83    2.10
   9   1   6   15.40    1.26
   9   1   6   13.88    1.39
  11  -1   6   -0.24    0.33
  11  -1   6    0.13    0.70
  11  -1   6    0.18    0.24
  11   1   6   -0.40    0.37
  11   1   6    1.64    0.87
  11   1   6   -0.28    0.20
  13  -1   6   11.72    0.98
  13  -1   6   10.48    1.91
  13  -1   6   10.95    0.83
  13   1   6   13.07    1.36
  13   1   6   15.83    2.44
  14  -2  -6    1.92    1.13
 -14  -2   6    1.81    0.55
  14   2  -6   -0.49    0.92
 -12  -2   6    0.83    0.39
  12  -2  -6    1.65    0.89
  12   2  -6    0.63    0.40
  12   2  -6   -0.42    0.68
  10  -2  -6    6.41    1.60
 -10  -2   6    8.57    1.16
  10   2  -6    8.53    1.12
  10   2  -6    6.52    1.73
   8  -2  -6    7.27    1.56
  -8  -2   6    6.97    1.03
   8   2  -6    3.06    1.18
   8   2  -6    9.35    1.23
  -6  -2   6   31.12    1.98
  -6  -2   6   32.37    2.75
   6  -2  -6   33.64    2.62
  -6   2   6   34.75    1.47
   6   2  -6   31.09    2.76
  -6   2   6   30.97    1.40
  -6   2   6   34.94    2.61
  -4  -2   6  130.45    5.48
   4  -2  -6  133.28    6.02
  -4  -2   6  133.74    6.41
  -4   2   6  138.07    6.00
  -4   2   6  125.85    4.96
   4   2  -6  134.49    5.46
   4   2  -6  134.02    6.40
  -4   2   6  125.06    5.14
  -2  -2   6   14.46    1.31
   2  -2  -6   17.15    1.47
  -2  -2   6   16.01    1.70
  -2   2   6   15.32    1.20
  -2   2   6   16.70    1.13
   2   2  -6   16.69    1.32
  -2   2   6   16.52    1.37
   2   2  -6   18.12    1.76
   0  -2   6   13.24    1.36
   0  -2   6   13.01    1.20
   0   2   6   13.58    1.12
   0   2  -6   14.97    1.24
   0   2   6   14.21    1.15
   0   2  -6   14.33    1.35
   2  -2   6  244.93    9.08
  -2  -2  -6  241.94    9.02
   2  -2   6  237.20    8.95
  -2  -2  -6  233.44    8.96
   2   2   6  234.99    8.91
  -2   2  -6  222.14    9.02
   2   2   6  227.05    9.25
  -2   2  -6  240.39    9.00
  -4  -2  -6   34.65    2.41
   4  -2   6   36.70    2.12
  -4  -2  -6   35.27    2.20
   4  -2   6   39.61    2.40
  -4   2  -6   33.74    2.13
   4   2   6   37.16    2.57
   4   2   6   37.03    2.17
   6  -2   6   41.11    2.28
   6  -2   6   36.82    2.64
  -6  -2  -6   46.79    2.59
  -6  -2  -6   37.37    2.75
  -6   2  -6   39.81    2.24
   6   2   6   40.49    2.64
  -6   2  -6   39.28    2.73
   6   2   6   44.33    3.01
   8  -2   6    3.31    1.00
   8  -2   6    3.50    0.61
   8  -2   6    4.67    0.79
   8   2   6    2.48    1.10
  10  -2   6    3.99    1.16
  10  -2   6    4.72    0.63
  10  -2   6    4.35    0.69
  10   2   6    4.40    0.97
  10   2   6    3.99    1.30
  12  -2   6   12.34    0.82
  12  -2   6    9.85    1.87
  12   2   6   12.70    1.61
  12   2   6    8.96    1.82
  14  -2   6   -0.04    0.53
  14   2   6    0.14    0.55
  14   2   6    0.23    0.80
  13  -3  -6    4.35    1.51
 -13  -3   6    7.61    1.14
  13   3  -6    5.91    1.80
  11  -3  -6   27.58    2.78
 -11  -3   6   26.46    1.89
  11   3  -6   24.57    2.81
   9  -3  -6    7.71    1.70
  -9  -3   6    6.14    1.08
   9   3  -6    5.74    1.65
   7  -3  -6   13.03    2.44
  -7  -3   6   16.28    1.44
   7   3  -6   15.47    2.35
   7   3  -6   14.06    1.31
  -5  -3   6    3.13    0.75
   5  -3  -6    6.50    1.38
  -5  -3   6    6.27    1.45
   5   3  -6    5.61    1.03
  -5   3   6    5.60    0.68
  -5   3   6    6.52    0.86
  -5   3   6    4.85    1.09
   5   3  -6    7.85    1.85
   3  -3  -6   75.15    4.03
  -3  -3   6   76.34    3.70
  -3  -3   6   69.13    4.35
  -3   3   6   76.17    3.97
   3   3  -6   74.78    4.45
   3   3  -6   75.32    3.63
  -3   3   6   67.83    3.16
  -3   3   6   76.90    3.34
   1  -3  -6   12.80    1.37
   1  -3  -6   12.22    1.07
  -1  -3   6   12.71    1.24
  -1  -3   6   13.06    1.90
   1   3  -6   11.13    1.14
  -1   3   6   13.65    1.11
  -1   3   6   11.20    1.22
   1   3  -6   14.39    1.63
  -1  -3  -6   26.30    1.79
   1  -3   6   26.82    1.84
   1   3   6   26.82    2.23
  -1   3  -6   28.66    1.85
   1   3   6   26.88    1.79
  -1   3  -6   29.78    2.19
   1   3   6   28.77    2.00
  -1   3  -6   25.75    2.07
   3  -3   6  103.91    4.92
  -3  -3  -6   99.64    4.59
   3  -3   6   98.43    4.39
   3   3   6   98.47    5.24
  -3   3  -6  106.93    4.56
   3   3   6   99.40    4.53
  -3   3  -6  100.05    4.97
   5  -3   6  153.10    6.82
   5  -3   6  152.28    6.03
  -5  -3  -6  160.13    6.50
  -5  -3  -6  145.05    6.90
   5   3   6  162.35    7.38
  -5   3  -6  149.40    7.54
  -5   3  -6  142.54    6.20
   5   3   6  148.15    6.35
   7  -3   6    3.20    1.09
   7  -3   6    3.66    0.67
  -7  -3  -6    2.86    0.83
  -7  -3  -6    4.60    1.29
   7   3   6    3.11    1.11
  -7   3  -6    2.31    0.57
   9  -3   6   16.35    1.08
  -9  -3  -6   18.19    1.67
   9  -3   6   14.66    2.20
   9  -3   6   15.42    1.05
   9   3   6   20.92    2.31
  11  -3   6   10.37    1.92
  11   3   6    9.93    1.98
  13  -3   6    3.22    1.16
  13   3   6    1.15    0.68
  13   3   6    1.93    1.01
  12  -4  -6   -0.25    0.69
 -12  -4   6   -0.59    0.32
  12   4  -6   -0.68    0.79
  10  -4  -6    1.84    0.91
 -10  -4   6    2.06    0.68
  10   4  -6    0.88    0.89
  -8  -4   6    3.27    0.90
   8  -4  -6    3.84    1.15
   8   4  -6    2.34    1.22
   6  -4  -6    4.55    1.49
  -6  -4   6    7.30    1.33
  -6   4   6    5.15    0.85
   6   4  -6    4.13    1.35
  -6   4   6    4.76    0.50
  -4  -4   6   45.11    2.76
  -4  -4   6   41.45    3.38
   4  -4  -6   49.19    3.32
   4   4  -6   38.99    3.36
  -4   4   6   46.86    2.26
  -4   4   6   45.39    3.05
   4   4  -6   46.78    2.72
  -2  -4   6    0.53    0.64
   2  -4  -6    0.27    0.34
  -2  -4   6    0.72    0.48
   2  -4  -6    0.49    0.55
  -2   4   6    0.39    0.34
   2   4  -6    0.65    0.28
   2   4  -6    0.09    0.67
  -2   4   6   -0.12    0.30
   0  -4   6    1.89    0.65
   0  -4  -6    3.48    0.81
   0   4   6    3.33    0.91
   0   4   6    2.74    0.70
   0   4  -6    0.86    0.55
   0   4  -6    1.76    0.66
   0   4  -6    2.15    0.87
   0   4   6    1.12    0.60
  -2  -4  -6   37.86    2.40
  -2  -4  -6   38.61    2.70
   2  -4   6   35.23    2.28
  -2   4  -6   38.92    2.32
  -2   4  -6   38.18    2.80
  -2   4  -6   44.44    3.01
   2   4   6   38.70    3.07
   2   4   6   39.87    2.39
   4  -4   6    0.24    0.50
   4  -4   6   -0.06    0.25
  -4  -4  -6    0.54    0.44
   4   4   6    0.37    0.79
  -4   4  -6   -0.77    0.26
  -4   4  -6   -0.70    0.36
   4   4   6    0.17    0.25
   6  -4   6    7.28    1.01
  -6  -4  -6    4.91    1.23
  -6  -4  -6    7.06    1.53
   6  -4   6    6.79    1.45
  -6   4  -6    8.27    1.20
   6   4   6    8.71    1.78
   8  -4   6    3.95    1.17
   8  -4   6    4.80    0.69
  -8  -4  -6    3.49    0.88
   8   4   6    7.93    1.96
  -8   4  -6    4.08    0.86
  10  -4   6    0.45    0.84
  10  -4   6    0.00    0.20
  10  -4   6    0.68    0.28
 -10  -4  -6    0.08    0.46
  10   4   6   -0.10    0.66
  12  -4   6    1.67    0.91
 -12  -4  -6    2.94    0.84
  12   4   6   -0.19    0.90
  11  -5  -6    7.04    1.80
 -11  -5   6    6.17    1.13
  -9  -5   6   19.66    1.78
   9  -5  -6   18.56    2.69
   9   5  -6   15.22    2.74
  -7  -5   6   11.23    1.65
   7  -5  -6    7.55    1.54
  -7   5   6    8.57    0.77
   7   5  -6   12.77    2.51
  -7   5   6    7.94    0.68
  -5  -5   6    0.98    0.56
   5  -5  -6    1.67    0.86
   5   5  -6    2.34    1.21
  -5   5   6    0.98    0.42
   3  -5  -6   -0.98    0.37
  -3  -5   6    0.07    0.33
   3  -5  -6    0.27    0.36
   3   5  -6    1.05    0.91
  -3   5   6    0.34    0.34
  -1  -5   6    8.15    1.34
   1  -5  -6    7.48    1.25
  -1   5   6    7.20    1.70
  -1   5   6    6.82    1.30
   1   5  -6    7.73    1.66
  -1   5   6    7.18    1.07
   1  -5   6   19.75    1.68
  -1  -5  -6   19.79    1.68
  -1   5  -6   19.78    2.14
  -1   5  -6   16.56    1.91
   1   5   6   22.50    2.49
   1   5   6   19.86    1.61
  -1   5  -6   19.09    1.57
   1   5   6   16.63    1.76
  -3  -5  -6    5.37    1.22
   3  -5   6    7.47    1.10
  -3  -5  -6    7.85    1.23
  -3   5  -6   10.54    1.09
   3   5   6    5.74    1.54
  -5  -5  -6   16.10    1.63
   5  -5   6   15.18    1.30
   5  -5   6   16.16    2.35
   5   5   6   13.83    2.50
  -7  -5  -6   41.49    2.76
   7  -5   6   36.88    3.12
   7  -5   6   40.76    2.14
  -7   5  -6   37.22    2.30
   7   5   6   43.01    3.69
   9  -5   6    5.90    0.61
   9  -5   6    5.39    1.47
  -9  -5  -6    4.52    1.05
  -9   5  -6    5.32    0.85
   9   5   6    2.53    1.34
  11  -5   6    0.37    0.69
  11   5   6   -0.38    0.94
 -10  -6   6    0.09    0.42
   8  -6  -6   18.89    2.79
  -8  -6   6   21.82    1.91
   8   6  -6   15.75    2.84
  -8   6   6   17.11    1.00
  -8   6   6   17.98    1.27
   6  -6  -6   40.57    3.39
  -6  -6   6   46.83    2.96
  -6   6   6   41.81    2.19
   6   6  -6   42.20    3.84
   4  -6  -6   10.08    1.97
  -4  -6   6   12.56    1.89
   4  -6  -6   13.05    1.20
  -4   6   6   11.27    1.08
   4   6  -6   14.24    2.52
  -2  -6   6    0.64    0.46
   2  -6  -6    0.96    0.60
  -2   6   6    0.71    0.45
  -2   6   6    0.87    0.95
   2   6  -6    0.70    0.84
   0  -6   6    9.90    1.57
   0  -6  -6    8.98    1.39
   0   6   6   12.56    2.44
   0   6  -6   10.35    2.09
  -2  -6  -6   16.88    1.63
   2  -6   6   18.82    1.62
  -2   6  -6   16.64    2.56
   4  -6   6   11.05    1.18
  -4  -6  -6    6.44    1.20
   4   6   6   10.97    2.33
   6  -6   6    0.19    0.60
  -6  -6  -6    0.35    0.58
   6  -6   6    0.79    0.52
  -6   6  -6    0.53    0.32
   6   6   6    2.50    1.31
   8  -6   6   12.21    1.03
  -8  -6  -6   14.17    1.96
   8  -6   6   14.49    2.35
   8   6   6    9.66    2.37
  -8   6  -6   10.90    1.81
 -10  -6  -6    8.61    1.54
  10  -6   6    5.94    1.45
  10  -6   6    5.89    0.59
  10   6   6    4.71    1.58
 -10   6  -6    7.56    0.87
  -9  -7   6    0.47    0.57
   9  -7  -6    0.61    0.86
   9   7  -6    0.29    0.88
   7  -7  -6    0.84    0.89
  -7  -7   6    0.28    0.55
  -7   7   6    0.07    0.29
   7   7  -6    0.42    0.80
  -7   7   6    0.08    0.38
   5  -7  -6    8.56    1.92
   5  -7  -6    6.91    1.03
  -5  -7   6    6.88    1.23
   5   7  -6    6.08    1.87
  -5   7   6    8.43    0.90
  -3  -7   6    8.24    1.50
  -3   7   6    4.88    1.60
   3   7  -6   15.70    2.83
  -1  -7   6    1.37    0.71
   1  -7  -6    0.44    0.56
   1   7  -6    0.87    0.77
  -1   7   6    2.46    1.25
   1  -7   6   14.68    1.90
  -1  -7  -6   13.86    1.87
   1   7   6   13.38    2.57
  -1   7  -6   11.87    2.20
   3  -7   6    0.66    0.48
  -3  -7  -6    0.30    0.48
  -3   7  -6    0.91    0.85
   3   7   6    0.48    0.91
  -5  -7  -6    8.16    1.41
   5  -7   6    8.81    1.25
   5   7   6    8.70    2.12
   7  -7   6    0.57    0.76
  -7  -7  -6    0.63    0.56
   7  -7   6    0.78    0.45
   7   7   6    0.63    1.07
  -9  -7  -6    0.49    0.65
   9  -7   6    1.60    0.96
   9  -7   6    0.60    0.34
  -9   7  -6    1.09    0.47
   9   7   6    0.31    0.81
   8  -8  -6    1.40    1.10
  -8  -8   6    0.34    0.63
   8   8  -6    1.94    1.08
  -8   8   6    2.56    0.64
  -6  -8   6    0.75    0.50
   6  -8  -6    0.71    0.86
   6  -8  -6    0.87    0.61
   6   8  -6   -0.23    0.93
   4  -8  -6   11.51    1.27
  -4  -8   6   11.34    1.69
  -4   8   6   14.72    2.84
   4   8  -6   15.82    2.84
   2  -8  -6   56.54    3.29
  -2  -8   6   61.17    3.64
   2   8  -6   60.19    4.60
  -2   8   6   69.13    4.97
   0  -8   6   32.93    2.49
   0  -8  -6   32.02    2.37
   0   8  -6   35.60    3.39
   0   8   6   34.76    3.53
  -2  -8  -6    0.84    0.61
   2  -8   6    0.64    0.60
   2   8   6    0.75    1.01
  -2   8  -6   -0.42    0.63
  -4  -8  -6    0.34    0.38
   4  -8   6    0.57    0.47
   4   8   6   -0.03    0.81
  -4   8  -6    0.24    0.84
  -6  -8  -6    2.40    0.80
   6  -8   6    4.47    0.90
  -6   8  -6    2.55    1.35
   6   8   6    2.40    1.35
   8  -8   6    1.26    0.46
   8  -8   6    0.83    0.81
  -8  -8  -6    0.44    0.57
  -5  -9   6    0.98    0.65
   5  -9  -6    1.49    0.56
   5   9  -6    2.13    1.15
  -5   9   6    1.39    1.17
   3  -9  -6   12.78    1.40
  -3   9   6   15.53    2.87
   1  -9  -6    6.67    1.28
  -1  -9   6    5.44    1.13
   1   9  -6    3.82    1.56
  -1   9   6    4.75    1.60
   1  -9   6   36.54    2.65
  -1  -9  -6   40.51    2.74
  -1   9  -6   38.40    3.61
  -3  -9  -6    6.31    1.21
   3  -9   6    7.15    1.26
   3   9   6    8.49    2.12
  -3   9  -6    7.04    1.96
   5  -9   6    0.84    0.50
  -5  -9  -6    0.67    0.64
  -5   9  -6   -0.44    0.86
  -2 -10   6    2.37    0.82
   2 -10  -6    4.33    0.97
  -2  10   6   -0.06    1.00
   2  10  -6    1.23    1.05
   0 -10  -6    1.46    0.78
   0 -10   6    1.31    0.80
   0  10   6    1.19    1.28
   0  10  -6    0.55    0.88
   2 -10   6    6.58    1.69
  -2 -10  -6    9.13    1.63
  -2  10  -6   10.97    2.42
   2  10   6    8.41    2.08
  14   0  -7   -0.81    0.59
  12   0  -7    0.05    0.27
  12   0  -7    1.26    0.93
  10   0  -7   -0.76    0.49
 -10   0   7    0.16    0.19
  10   0  -7    0.06    0.25
  -8   0   7   -0.30    0.16
   8   0  -7    0.30    0.55
   8   0  -7   -0.16    0.20
   6   0  -7   -0.07    0.50
   6   0  -7   -0.22    0.17
  -6   0   7   -0.10    0.22
  -6   0   7    0.49    0.57
   4   0  -7    0.39    0.46
  -4   0   7   -0.04    0.40
  -4   0   7    0.19    0.28
   4   0  -7    0.40    0.31
   2   0  -7    0.28    0.32
  -2   0   7    0.35    0.35
  -2   0   7    0.46    0.37
   0   0  -7    0.02    0.13
   0   0  -7    0.27    0.33
   0   0   7    0.28    0.18
   0   0   7   -0.16    0.31
   2   0   7    0.19    0.39
  -2   0  -7    0.15    0.19
  -2   0  -7   -0.23    0.28
   2   0   7    0.08    0.17
  -4   0  -7    0.38    0.33
   4   0   7    0.34    0.40
   4   0   7   -0.19    0.24
  -4   0  -7    0.28    0.30
   6   0   7    0.31    0.37
   6   0   7    0.23    0.29
   6   0   7   -0.41    0.17
  -6   0  -7    0.07    0.35
   8   0   7   -0.09    0.25
   8   0   7    0.22    0.43
  -8   0  -7    0.29    0.43
   8   0   7   -0.57    0.35
  10   0   7    0.07    0.55
  10   0   7    0.50    0.47
  12   0   7   -0.44    0.47
  12   0   7   -0.30    0.56
  12   0   7    0.60    0.30
  14   0   7    1.16    0.53
  14   0   7    0.34    0.61
 -13  -1   7    1.76    0.47
  13   1  -7    3.77    0.68
  11  -1  -7    0.39    0.80
 -11  -1   7   -0.06    0.25
  11   1  -7    0.55    0.33
  11   1  -7    1.49    0.94
   9  -1  -7   12.89    2.22
  -9  -1   7   10.51    0.97
   9   1  -7   12.31    1.06
   9   1  -7   11.20    2.08
   7  -1  -7    8.89    1.67
   7  -1  -7   11.74    1.09
  -7  -1   7    9.06    0.90
  -7   1   7    8.49    0.68
   7   1  -7    9.11    0.88
   7   1  -7   10.63    1.80
   5  -1  -7   14.74    1.56
  -5  -1   7   15.02    1.22
   5  -1  -7   13.67    1.07
  -5  -1   7   13.81    2.02
  -5   1   7   14.30    1.17
   5   1  -7   15.39    1.74
  -5   1   7   16.29    1.59
   5   1  -7   15.04    1.20
   3  -1  -7   85.60    3.76
  -3  -1   7   83.65    3.87
  -3  -1   7   86.59    4.37
   3  -1  -7   86.60    4.08
   3   1  -7   87.33    4.28
  -3   1   7   81.90    3.82
   3   1  -7   90.66    3.94
  -3   1   7   91.06    4.10
   1  -1  -7  107.22    4.56
   1  -1  -7  114.53    4.36
  -1  -1   7  108.95    4.73
  -1   1   7  111.36    4.70
   1   1  -7  105.49    4.55
   1   1  -7  107.69    4.66
  -1   1   7  102.08    4.24
   1  -1   7  137.59    5.51
  -1  -1  -7  126.84    5.26
  -1   1  -7  133.15    5.42
   1   1   7  113.36    4.56
  -1   1  -7  120.27    4.83
   1   1   7  125.43    5.33
  -1   1  -7  134.61    4.88
   1   1   7  122.41    4.75
   3  -1   7   14.23    1.39
   3   1   7   14.37    1.29
  -3   1  -7   16.91    1.20
   3   1   7   14.09    1.22
  -3   1  -7   16.00    1.38
   3   1   7   13.40    1.13
  -5  -1  -7    5.95    1.09
   5  -1   7    4.56    0.96
   5  -1   7    4.71    0.95
  -5   1  -7    6.73    1.08
   5   1   7    4.28    0.89
   5   1   7    5.68    1.09
  -5   1  -7    5.03    0.93
   5   1   7    5.87    0.95
   7  -1   7   55.32    3.34
   7  -1   7   53.84    2.71
   7  -1   7   53.90    3.00
   7   1   7   58.72    3.51
   7   1   7   56.38    3.07
  -7   1  -7   57.67    3.73
   9  -1   7   19.78    1.58
   9  -1   7   20.60    2.06
   9  -1   7   18.23    1.29
   9   1   7   17.55    1.39
   9   1   7   18.93    1.66
   9   1   7   14.97    2.24
  11  -1   7    1.63    0.41
  11  -1   7    1.46    0.94
  11  -1   7    1.17    0.61
  11   1   7    2.89    0.98
  11   1   7    1.63    0.69
  13  -1   7    0.14    0.38
  13  -1   7   -0.51    0.28
  13  -1   7    0.89    0.80
  13   1   7    0.08    0.50
  13   1   7    0.55    0.69
 -14  -2   7   10.13    1.04
  14  -2  -7    6.91    1.77
  14   2  -7    9.65    1.98
 -12  -2   7    3.44    0.70
  12  -2  -7    1.67    0.76
  12   2  -7    3.63    0.89
  12   2  -7    3.04    1.23
 -10  -2   7    1.47    0.55
  10  -2  -7    0.48    0.69
  10   2  -7    1.79    0.96
  10   2  -7    1.91    0.61
  -8  -2   7   10.89    1.16
   8  -2  -7    8.88    1.69
   8   2  -7   12.55    1.16
   8   2  -7   10.60    2.07
   6  -2  -7   79.76    4.55
  -6  -2   7   81.53    4.88
  -6  -2   7   87.64    3.93
  -6   2   7   86.88    3.38
   6   2  -7   85.41    4.94
  -6   2   7   82.66    3.28
  -6   2   7   81.49    4.54
  -4  -2   7   16.98    1.47
  -4  -2   7   17.51    1.90
   4  -2  -7   19.62    1.78
   4   2  -7   19.15    1.96
   4   2  -7   18.78    1.45
  -4   2   7   17.43    1.32
  -4   2   7   17.53    1.15
  -4   2   7   17.92    1.64
   2  -2  -7   19.58    1.59
  -2  -2   7   22.19    1.95
  -2  -2   7   19.07    1.56
   2   2  -7   20.70    1.86
   2   2  -7   21.58    1.54
  -2   2   7   21.58    1.57
  -2   2   7   22.18    1.54
  -2   2   7   20.37    1.37
   0  -2   7    2.79    0.65
   0  -2   7    2.19    0.69
   0   2   7    3.18    0.78
   0   2  -7    2.45    0.61
   0   2   7    3.65    0.69
   0   2  -7    3.86    0.86
   0   2   7    3.54    0.77
   2  -2   7   37.58    2.19
  -2  -2  -7   35.22    2.02
   2  -2   7   30.55    2.01
  -2   2  -7   31.43    2.05
   2   2   7   32.84    2.03
  -2   2  -7   34.59    2.13
  -4  -2  -7    0.11    0.38
   4  -2   7    0.17    0.35
   4  -2   7    0.20    0.28
   4   2   7   -0.30    0.43
  -4   2  -7    0.69    0.38
   4   2   7    0.11    0.28
  -4   2  -7    0.18    0.30
   6  -2   7   15.35    1.63
   6  -2   7   16.66    1.38
  -6  -2  -7   15.28    2.02
   6   2   7   17.59    1.78
  -6   2  -7   14.35    1.51
  -6   2  -7   14.38    1.33
   6   2   7   14.09    1.34
   8  -2   7   31.82    2.53
  -8  -2  -7   32.04    2.63
   8  -2   7   30.85    1.94
   8  -2   7   30.97    1.79
   8   2   7   32.28    2.66
   8   2   7   31.80    2.25
   8   2   7   33.46    2.08
  10  -2   7   30.31    1.68
  10  -2   7   33.81    2.80
  10  -2   7   33.50    1.91
  10   2   7   32.46    2.86
  12  -2   7    1.67    0.42
  12  -2   7    0.94    0.91
  12  -2   7    1.61    0.43
  12   2   7    1.19    0.85
  12   2   7    1.28    0.59
  14  -2   7    1.12    0.74
  14   2   7    0.41    0.96
  14   2   7    0.80    0.53
 -13  -3   7    6.12    1.01
  13  -3  -7    8.60    1.87
  13   3  -7    6.40    1.75
  11  -3  -7   12.85    2.24
 -11  -3   7   18.00    1.50
  11   3  -7   19.43    3.02
   9  -3  -7    8.13    1.66
  -9  -3   7    6.42    1.11
   9   3  -7    7.88    1.71
  -7  -3   7   39.78    2.38
   7  -3  -7   36.93    2.96
   7   3  -7   33.66    2.21
   7   3  -7   31.41    3.00
  -5  -3   7    1.53    0.62
   5  -3  -7    0.57    0.73
  -5  -3   7    0.78    0.41
  -5   3   7    0.85    0.40
   5   3  -7    0.92    0.45
  -5   3   7    1.38    0.59
   5   3  -7    0.06    0.59
  -5   3   7    1.17    0.34
  -3  -3   7    3.06    0.86
  -3  -3   7    2.10    0.96
   3  -3  -7    1.86    0.70
  -3   3   7    1.67    0.57
   3   3  -7    2.72    0.61
   3   3  -7    3.26    1.13
  -3   3   7    1.66    0.49
  -3   3   7    1.28    0.60
   1  -3  -7    6.11    1.23
  -1  -3   7    6.28    1.39
  -1  -3   7    7.13    1.16
  -1   3   7    6.51    1.10
   1   3  -7    6.33    1.28
   1   3  -7    6.33    1.07
  -1   3   7    5.86    0.85
  -1  -3  -7    1.46    0.47
   1  -3   7    3.82    0.89
  -1   3  -7    3.27    0.94
   1   3   7    2.86    0.68
  -1   3  -7    3.46    0.94
   1   3   7    2.54    0.67
   1   3   7    2.02    0.83
  -1   3  -7    3.12    0.73
  -3  -3  -7  133.08    5.96
  -3  -3  -7  135.29    5.79
   3  -3   7  134.40    5.64
   3  -3   7  141.12    6.09
   3   3   7  129.20    6.30
  -3   3  -7  130.04    6.06
  -3   3  -7  132.38    5.71
   5  -3   7   40.22    2.30
  -5  -3  -7   37.33    2.46
   5  -3   7   41.41    2.77
  -5   3  -7   41.07    2.44
   5   3   7   35.29    2.35
   5   3   7   44.20    3.07
  -5   3  -7   40.33    2.83
  -7  -3  -7   22.12    1.84
   7  -3   7   19.63    1.43
   7  -3   7   22.81    2.10
  -7  -3  -7   20.59    2.05
   7   3   7   21.47    2.25
  -7   3  -7   19.68    1.56
   9  -3   7    1.99    0.96
   9  -3   7    4.14    0.66
  -9  -3  -7    4.63    1.10
   9   3   7    3.98    1.33
  11  -3   7   15.89    0.99
  11  -3   7   15.39    0.94
  11  -3   7   15.69    2.32
  11   3   7   15.50    1.59
  11   3   7   14.85    2.40
  13  -3   7    0.68    0.72
  13   3   7    0.79    0.55
  13   3   7    0.88    0.84
  12  -4  -7    3.09    1.25
 -12  -4   7    2.40    0.78
  12   4  -7    1.23    0.91
  10  -4  -7   76.04    4.89
 -10  -4   7   74.78    3.89
  10   4  -7   77.22    5.31
  -8  -4   7   18.34    1.69
   8  -4  -7   20.26    2.30
   8   4  -7   21.67    3.07
   6  -4  -7   -0.05    0.57
  -6  -4   7   -0.18    0.40
   6   4  -7    0.41    0.84
  -6   4   7    0.03    0.17
  -6   4   7    0.19    0.25
   4  -4  -7   16.58    2.34
  -4  -4   7   15.74    1.50
  -4  -4   7   13.45    2.22
  -4   4   7   17.71    1.76
   4   4  -7   19.07    1.73
  -4   4   7   17.00    1.21
  -4   4   7   18.03    1.35
   4   4  -7   16.38    2.44
   2  -4  -7    8.68    0.94
   2  -4  -7    7.56    1.54
  -2  -4   7    7.00    1.26
  -2  -4   7    8.09    1.77
   2   4  -7    7.20    1.20
   2   4  -7    7.85    1.63
  -2   4   7    9.80    1.57
  -2   4   7    6.89    0.98
   0  -4   7   15.99    1.56
   0  -4  -7   20.25    1.56
   0   4  -7   17.45    1.87
   0   4   7   22.15    1.80
   0   4   7   20.77    2.08
   0   4  -7   18.54    2.00
   0   4  -7   18.69    1.57
   0   4   7   18.72    1.51
  -2  -4  -7   47.61    2.86
   2  -4   7   51.42    2.86
  -2   4  -7   52.26    2.85
   2   4   7   49.79    2.84
  -2   4  -7   44.94    3.16
  -2   4  -7   51.78    3.34
   2   4   7   53.84    3.60
   4  -4   7   21.76    2.08
   4  -4   7   23.96    1.70
  -4  -4  -7   24.11    1.88
  -4  -4  -7   14.48    2.35
  -4   4  -7   22.00    2.00
   4   4   7   23.57    2.44
  -4   4  -7   26.19    1.84
   6  -4   7  202.89    9.12
  -6  -4  -7  204.10    9.22
  -6  -4  -7  210.19    8.67
   6  -4   7  217.96    8.15
   6   4   7  213.20    9.70
  -6   4  -7  216.37    8.47
   8  -4   7    1.19    0.84
   8  -4   7    0.69    0.38
  -8  -4  -7    1.55    0.79
  -8   4  -7    1.83    0.49
   8   4   7    1.36    1.10
 -10  -4  -7    0.41    0.53
  10  -4   7    0.40    0.65
  10  -4   7    0.27    0.32
  10  -4   7    0.74    0.29
  10   4   7    1.20    1.00
  12  -4   7   17.69    2.62
  12   4   7   25.18    2.70
 -11  -5   7   18.80    1.74
  11   5  -7   16.98    3.35
   9  -5  -7    6.38    1.65
  -9  -5   7    6.36    1.26
   9   5  -7    8.24    1.94
   7  -5  -7   40.77    3.23
  -7  -5   7   37.76    2.58
   7   5  -7   42.77    3.66
  -7   5   7   36.55    1.77
  -7   5   7   36.94    1.95
  -5  -5   7    5.37    1.15
   5  -5  -7    2.61    1.11
   5   5  -7    5.17    1.64
  -5   5   7    3.78    0.77
  -5   5   7    4.48    0.72
   3  -5  -7    2.48    0.61
  -3  -5   7    0.86    0.97
   3  -5  -7    1.10    0.75
  -3   5   7    2.80    0.62
   3   5  -7    2.25    1.04
  -1  -5   7    6.19    1.16
   1  -5  -7    8.26    1.31
  -1   5   7    6.82    1.35
   1   5  -7    7.84    1.78
  -1   5   7    7.45    1.23
  -1   5   7    9.11    1.91
  -1  -5  -7    0.53    0.50
   1  -5   7    0.24    0.40
  -1   5  -7    0.07    0.52
  -1   5  -7    0.19    0.28
  -1   5  -7    0.18    0.47
   1   5   7   -0.44    0.48
   1   5   7   -0.20    0.37
   3  -5   7  116.63    5.12
  -3  -5  -7  105.78    5.64
  -3   5  -7  114.15    5.12
   3   5   7  113.73    6.36
  -3   5  -7  114.55    5.97
   5  -5   7   56.04    3.78
   5  -5   7   50.21    2.80
  -5  -5  -7   53.27    3.25
   5   5   7   55.05    4.11
  -5   5  -7   54.50    2.99
   7  -5   7   18.95    2.16
   7  -5   7   19.02    1.44
  -7  -5  -7   24.14    2.01
  -7   5  -7   18.19    1.95
   7   5   7   18.74    2.81
   9  -5   7    5.35    1.42
   9  -5   7    7.00    0.87
  -9  -5  -7    5.83    1.26
  -9   5  -7    6.46    0.98
   9   5   7    4.01    1.45
 -11  -5  -7   10.08    1.53
  11  -5   7   11.04    1.98
  11   5   7    7.04    1.72
 -10  -6   7   13.05    1.79
  10   6  -7   12.45    2.47
   8  -6  -7    0.97    0.93
  -8  -6   7    2.14    0.78
   8   6  -7    1.20    1.00
  -8   6   7    1.59    0.40
  -8   6   7    1.64    0.36
   6  -6  -7   17.11    2.54
  -6  -6   7   19.67    1.92
   6   6  -7   24.20    3.38
  -6   6   7   25.99    1.65
  -6   6   7   20.23    1.36
  -4  -6   7    1.74    0.71
   4  -6  -7    3.16    1.24
   4  -6  -7    2.86    0.73
  -4   6   7    3.40    0.70
   4   6  -7    5.69    1.56
   2  -6  -7    4.80    0.93
  -2  -6   7    4.79    1.15
   2   6  -7    6.24    1.68
  -2   6   7    5.22    1.52
   0  -6   7    2.34    0.81
   0  -6  -7    2.15    0.81
   0   6  -7    2.87    1.21
   0   6   7    2.67    1.27
  -2  -6  -7   42.10    2.75
  -2   6  -7   41.24    3.42
   2   6   7   42.27    4.19
  -4  -6  -7    0.79    0.55
   4  -6   7    0.09    0.39
   4   6   7    0.35    0.93
   6  -6   7   32.71    2.95
  -6  -6  -7   33.96    2.51
   6  -6   7   28.72    1.95
  -6   6  -7   33.92    2.19
   6   6   7   30.45    3.25
   8  -6   7   12.67    1.10
   8  -6   7   15.65    2.36
  -8  -6  -7   15.03    2.05
   8   6   7   13.49    2.60
  -8   6  -7   13.98    1.30
 -10  -6  -7   15.77    2.10
  10  -6   7   17.28    2.56
  10  -6   7   14.19    0.99
  10   6   7   14.07    2.46
 -10   6  -7   14.91    1.21
  -9  -7   7    1.84    0.73
   9  -7  -7    0.29    0.68
   9   7  -7    3.86    1.16
  -7  -7   7    4.69    1.12
   7  -7  -7    4.33    1.26
   7   7  -7    3.95    1.44
  -7   7   7    4.02    1.10
  -7   7   7    5.55    0.91
   5  -7  -7   11.83    2.19
  -5  -7   7   16.35    1.73
   5  -7  -7   15.47    1.30
   5   7  -7   10.57    2.25
   3  -7  -7    5.37    0.99
  -3  -7   7    5.33    1.10
  -3   7   7    5.73    1.69
   3   7  -7    5.55    1.66
  -1  -7   7   27.97    2.24
   1  -7  -7   29.59    2.09
  -1   7   7   21.22    3.11
   1   7  -7   25.21    2.82
   1  -7   7   49.62    3.05
  -1  -7  -7   48.53    3.02
  -1   7  -7   49.57    3.96
   1   7   7   48.11    4.02
   3  -7   7    3.16    0.87
  -3  -7  -7    2.57    0.81
  -3   7  -7    1.67    1.01
   3   7   7    2.95    1.17
  -5  -7  -7    1.52    0.65
   5  -7   7    1.12    0.57
  -5   7  -7    1.43    0.98
   5   7   7    2.02    1.28
   7  -7   7   39.58    3.38
  -7  -7  -7   41.27    2.93
   9  -7   7    3.19    1.22
  -9  -7  -7    5.88    1.52
   9  -7   7    5.33    0.79
  -9   7  -7    4.65    0.87
   9   7   7    4.48    1.64
  -8  -8   7    2.64    0.84
   8  -8  -7    2.64    1.25
  -8   8   7    2.74    0.63
   8   8  -7    1.85    1.02
   6  -8  -7   10.07    2.10
  -6  -8   7    8.24    1.44
   6   8  -7   12.43    2.41
  -4  -8   7    0.60    0.59
   4  -8  -7    0.27    0.35
   4   8  -7   -0.35    0.69
  -4   8   7   -0.76    0.90
   2  -8  -7    0.91    0.57
  -2  -8   7    0.45    0.59
  -2   8   7    0.54    0.83
   2   8  -7    2.17    1.25
   0  -8   7    7.90    1.51
   0  -8  -7    7.15    1.33
   0   8  -7    4.65    1.48
   0   8   7    5.80    1.68
  -2  -8  -7   11.23    1.71
   2  -8   7   10.67    1.59
   2   8   7    7.46    1.94
  -2   8  -7    9.05    2.08
  -4  -8  -7   -0.05    0.36
   4  -8   7   -0.03    0.42
   4   8   7    0.49    0.89
  -4   8  -7    1.87    1.05
   6  -8   7    3.57    0.88
  -6  -8  -7    2.86    0.99
   6   8   7    4.32    1.75
  -6   8  -7    3.84    1.25
  -8  -8  -7    5.14    1.20
   8  -8   7    3.75    0.77
   8  -8   7    3.87    1.39
   8   8   7    1.46    1.54
   5  -9  -7   -0.24    0.35
  -5  -9   7    1.30    0.71
  -5   9   7    1.16    0.93
   5   9  -7    0.63    0.73
  -3  -9   7    5.55    1.31
   3  -9  -7    6.63    1.14
   3   9  -7    5.71    1.91
  -3   9   7    5.82    1.84
  -1  -9   7    6.31    1.29
   1  -9  -7    7.72    1.30
   1   9  -7    7.98    1.93
  -1   9   7    4.70    1.68
  -1  -9  -7   -0.45    0.40
   1  -9   7    0.10    0.42
   1   9   7    0.04    0.71
  -1   9  -7    0.16    0.90
   3  -9   7    5.83    1.17
   3   9   7    4.16    1.63
   5  -9   7    8.96    1.30
  -5  -9  -7    4.63    1.11
   5   9   7   11.52    3.63
  -5   9  -7   10.81    2.26
   2 -10  -7    2.98    0.88
  -2 -10   7    3.97    1.01
  -2  10   7    3.76    1.64
   2  10  -7    3.93    1.21
   0 -10   7    1.38    0.67
   0 -10  -7    0.82    0.60
   0  10  -7    2.47    1.05
   0  10   7    2.94    1.33
  -2 -10  -7   -0.64    0.38
   2 -10   7    0.53    0.48
  -2  10  -7   -0.44    0.99
   2  10   7   -1.38    0.66
  14   0  -8   -0.29    0.57
 -12   0   8    1.16    0.27
  12   0  -8    1.71    1.13
  12   0  -8    0.93    0.35
 -10   0   8    1.24    0.36
  10   0  -8    1.90    0.49
  10   0  -8    0.90    0.93
  -8   0   8   74.57    3.27
   8   0  -8   79.80    4.73
   8   0  -8   76.59    3.41
   6   0  -8  224.33    8.57
   6   0  -8  229.56    9.69
  -6   0   8  219.44    8.43
  -6   0   8  238.35    9.79
  -4   0   8   85.69    4.24
  -4   0   8   81.30    3.72
   4   0  -8   80.96    3.72
   4   0  -8   77.25    4.08
   2   0  -8  143.41    6.26
  -2   0   8  159.47    6.10
  -2   0   8  140.99    6.17
   2   0  -8  153.80    6.19
   0   0  -8   51.27    1.94
   0   0  -8   52.98    2.83
   0   0   8   47.90    2.80
   0   0   8   49.81    2.06
  -2   0  -8    4.02    0.96
   2   0   8    3.03    0.82
   2   0   8    3.02    0.40
  -2   0  -8    3.58    0.45
  -4   0  -8   69.94    3.26
  -4   0  -8   76.93    3.54
   4   0   8   60.94    3.09
   4   0   8   70.91    3.62
   6   0   8    8.02    1.24
   6   0   8   10.22    1.36
  -6   0  -8   10.26    1.44
   8   0   8   63.37    3.45
   8   0   8   60.17    3.07
   8   0   8   65.38    3.73
  10   0   8   41.95    3.14
  10   0   8   49.73    2.84
  10   0   8   42.01    2.34
  12   0   8    7.55    1.62
  12   0   8    9.60    1.40
  12   0   8    9.22    0.95
  14   0   8    1.46    0.92
  14   0   8    1.42    0.59
  13  -1  -8    1.42    0.96
 -13  -1   8    1.82    0.48
  13   1  -8    2.21    1.17
  11  -1  -8    2.76    1.09
 -11  -1   8    2.17    0.55
  11   1  -8    1.81    0.54
  11   1  -8    1.92    1.09
  -9  -1   8   30.98    1.80
   9  -1  -8   29.10    2.77
   9   1  -8   28.11    1.81
   9   1  -8   29.41    2.85
  -9   1   8   28.91    1.38
   7  -1  -8    0.07    0.48
   7  -1  -8    0.29    0.26
  -7  -1   8    0.17    0.25
   7   1  -8    0.51    0.33
   7   1  -8    0.40    0.58
  -7   1   8    0.41    0.24
  -5  -1   8  250.50   10.14
   5  -1  -8  228.42    8.85
  -5  -1   8  233.37    9.02
   5  -1  -8  235.97    9.73
  -5   1   8  236.97    8.86
  -5   1   8  237.66    9.71
   5   1  -8  242.51    9.11
   5   1  -8  239.99    9.93
   3  -1  -8   40.11    2.39
  -3  -1   8   37.30    2.56
  -3  -1   8   38.87    2.31
   3  -1  -8   39.16    2.22
  -3   1   8   37.36    2.30
   3   1  -8   39.00    2.52
   3   1  -8   44.92    2.38
  -3   1   8   41.01    2.38
   1  -1  -8   83.28    3.78
   1  -1  -8   82.91    3.42
  -1  -1   8   73.78    4.06
   1   1  -8   81.90    3.64
  -1   1   8   80.98    3.85
   1   1  -8   89.02    3.91
  -1   1   8   74.73    3.30
   1  -1   8    5.80    1.08
  -1  -1  -8    5.63    1.03
   1   1   8    6.94    0.60
   1   1   8    5.30    1.01
  -1   1  -8    5.65    0.63
   1   1   8    6.25    0.48
  -1   1  -8    7.89    1.26
  -1   1  -8    6.20    0.68
  -3  -1  -8   17.92    1.25
   3  -1   8   16.88    1.60
   3   1   8   15.49    1.16
  -3   1  -8   16.31    1.21
   3   1   8   16.71    1.51
   3   1   8   16.82    1.40
  -3   1  -8   18.49    1.55
   5  -1   8    0.79    0.50
   5  -1   8    0.45    0.41
  -5  -1  -8    0.25    0.42
   5   1   8    0.97    0.56
  -5   1  -8    0.59    0.43
   5   1   8    0.56    0.38
  -5   1  -8    1.06    0.47
   5   1   8    0.79    0.48
   7  -1   8   57.18    3.30
   7  -1   8   50.99    2.74
  -7  -1  -8   53.24    3.31
   7  -1   8   50.38    2.99
   7   1   8   56.27    3.13
   7   1   8   60.06    3.44
   9  -1   8    2.24    0.60
   9  -1   8    2.16    0.85
   9  -1   8    4.07    0.92
   9   1   8    3.91    0.97
   9   1   8    4.32    0.87
   9   1   8    4.14    1.05
  11  -1   8   56.02    3.07
  11  -1   8   57.50    2.75
  11  -1   8   52.54    3.66
  11   1   8   52.75    3.18
  11   1   8   59.72    3.92
  13  -1   8    0.46    0.69
  13  -1   8   -0.16    0.34
  13   1   8    0.83    0.63
  13   1   8    0.48    0.63
 -14  -2   8    1.42    0.56
  14  -2  -8    0.95    0.96
  14   2  -8    2.18    0.96
 -12  -2   8    7.54    1.09
  12  -2  -8    8.78    1.93
  12   2  -8    6.41    1.66
 -10  -2   8   41.77    2.39
  10  -2  -8   46.68    3.64
  10   2  -8   41.54    2.42
  10   2  -8   46.32    3.67
  -8  -2   8    5.28    0.97
   8  -2  -8    2.71    1.02
   8   2  -8    4.92    0.86
   8   2  -8    2.91    1.06
  -6  -2   8   64.95    4.15
  -6  -2   8   64.83    3.23
   6  -2  -8   66.03    3.89
   6   2  -8   64.70    4.05
  -6   2   8   63.65    3.77
  -6   2   8   58.99    3.06
  -6   2   8   55.14    2.60
   4  -2  -8  114.11    5.49
  -4  -2   8  117.23    5.21
  -4  -2   8  126.28    6.08
   4   2  -8  119.92    5.19
  -4   2   8  116.42    5.01
  -4   2   8  119.83    5.49
   4   2  -8  120.59    5.89
  -2  -2   8   78.65    3.97
   2  -2  -8   80.34    3.93
  -2  -2   8   96.24    4.62
  -2   2   8   84.37    3.90
   2   2  -8   82.99    4.28
  -2   2   8   87.54    3.79
  -2   2   8   85.02    3.90
   2   2  -8   78.64    3.91
   0  -2   8  111.10    4.99
   0  -2   8  105.41    4.98
   0   2   8  111.99    4.79
   0   2  -8  112.60    4.96
   0   2   8  107.83    4.83
   0   2  -8  106.78    4.88
   0   2   8  116.04    4.55
  -2  -2  -8   41.28    2.18
   2  -2   8   41.20    2.49
   2  -2   8   40.81    2.33
  -2   2  -8   43.42    2.53
  -2   2  -8   42.57    2.37
   2   2   8   39.55    2.42
   2   2   8   31.57    2.54
   4  -2   8    9.95    1.35
  -4  -2  -8    8.53    1.32
   4  -2   8    8.51    1.31
  -4   2  -8    9.91    1.42
   4   2   8    8.28    1.28
   4   2   8    8.94    1.35
  -4   2  -8    9.28    1.33
   4   2   8    8.58    1.27
  -6  -2  -8   82.09    4.30
   6  -2   8   79.79    4.18
   6  -2   8   81.25    3.95
   6   2   8   82.75    4.09
   6   2   8   79.71    4.34
  -6   2  -8   76.94    3.91
   6   2   8   85.70    4.00
  -8  -2  -8   -0.24    0.29
   8  -2   8    1.07    0.47
   8  -2   8    0.70    0.69
   8   2   8    1.75    0.90
   8   2   8    0.97    0.59
  10  -2   8    1.69    0.81
  10  -2   8    1.25    0.54
  10  -2   8    1.81    0.48
  10   2   8    1.56    0.70
  10   2   8    2.68    1.08
  12  -2   8   35.69    1.96
  12  -2   8   36.13    2.94
  12  -2   8   34.97    1.76
  12   2   8   37.02    2.50
  12   2   8   36.47    3.09
  14  -2   8    2.53    1.01
  14   2   8    3.33    0.87
  14   2   8    1.70    1.48
 -13  -3   8    1.91    0.56
  13  -3  -8    2.91    1.13
  13   3  -8    1.31    0.88
 -11  -3   8    1.40    0.54
  11  -3  -8    0.78    0.95
  11   3  -8    0.96    0.82
  -9  -3   8   21.43    1.70
   9  -3  -8   24.13    2.46
   9   3  -8   20.60    2.87
  -7  -3   8   26.18    1.97
   7  -3  -8   27.28    2.47
  -7   3   8   26.28    1.39
   7   3  -8   26.62    2.76
   7   3  -8   29.20    2.23
  -7   3   8   27.41    1.39
  -5  -3   8    3.06    1.10
   5  -3  -8    1.78    0.83
  -5  -3   8    1.83    0.70
   5   3  -8    1.88    0.53
  -5   3   8    2.30    0.60
   5   3  -8    2.45    1.01
  -5   3   8    2.56    0.56
  -5   3   8    1.46    0.70
  -3  -3   8   57.08    3.67
   3  -3  -8   45.74    3.01
  -3  -3   8   49.18    2.91
  -3   3   8   48.28    2.49
   3   3  -8   53.47    3.53
  -3   3   8   50.78    3.02
   3   3  -8   50.63    2.87
  -3   3   8   49.02    2.64
   1  -3  -8  217.96    8.83
  -1  -3   8  209.63    8.64
  -1  -3   8  209.68    9.27
  -1   3   8  217.62    8.37
  -1   3   8  219.99    8.62
   1   3  -8  214.81    9.11
   1   3  -8  220.79    8.65
  -1   3   8  224.13    8.53
   1  -3   8   11.60    1.26
   1   3   8    9.68    1.06
   1   3   8   10.37    1.58
  -1   3  -8   14.53    1.33
   1   3   8    9.83    1.09
  -1   3  -8   11.39    1.59
   3  -3   8   26.29    1.88
  -3  -3  -8   23.15    1.86
   3  -3   8   25.17    1.99
  -3   3  -8   26.69    1.89
   3   3   8   23.23    1.76
   3   3   8   24.22    2.16
  -5  -3  -8   28.37    2.09
   5  -3   8   30.32    2.29
  -5  -3  -8   29.48    2.27
   5  -3   8   25.68    1.86
  -5   3  -8   23.37    2.09
   5   3   8   28.07    2.41
  -5   3  -8   29.23    2.02
   5   3   8   27.98    1.96
  -7  -3  -8    8.38    1.40
   7  -3   8    7.80    1.55
   7  -3   8    7.07    1.10
  -7   3  -8    9.55    1.34
   7   3   8    8.37    1.69
   9  -3   8    0.95    0.74
   9  -3   8    0.61    0.36
   9   3   8    0.83    0.70
  11  -3   8    3.32    1.11
  11  -3   8    2.62    0.47
  11  -3   8    2.78    0.54
  11   3   8    2.86    0.82
  11   3   8    3.65    1.13
  13  -3   8    5.85    1.41
  13   3   8    4.92    1.49
  13   3   8    6.31    1.17
 -12  -4   8    0.42    0.44
  12  -4  -8    0.86    0.78
  12   4  -8   -0.43    0.74
  10  -4  -8    7.84    1.83
 -10  -4   8    7.89    1.22
  10   4  -8    6.44    1.68
  -8  -4   8    2.95    0.90
   8  -4  -8    2.69    1.10
   8   4  -8    3.36    1.17
   6  -4  -8    4.38    1.26
   6   4  -8    2.26    1.13
  -6   4   8    4.05    0.72
  -6   4   8    3.73    0.57
  -4  -4   8    6.74    1.25
   4  -4  -8   11.31    1.97
  -4  -4   8    6.39    1.78
  -4   4   8    7.30    0.98
  -4   4   8    7.79    1.45
  -4   4   8    7.44    1.15
   4   4  -8    8.49    1.70
  -2  -4   8    4.37    1.29
  -2  -4   8    3.90    0.95
   2  -4  -8    3.01    1.05
   2   4  -8    3.53    0.75
   2   4  -8    4.46    1.25
  -2   4   8    6.17    0.95
  -2   4   8    5.49    1.15
   0  -4   8   19.63    1.73
   0  -4  -8   18.24    1.57
   0   4  -8   20.10    2.03
   0   4  -8   22.05    2.04
   0   4   8   22.53    1.61
   0   4   8   16.68    1.88
   0   4  -8   21.02    1.70
   0   4   8   21.35    1.79
   2  -4   8    5.68    1.09
  -2  -4  -8    5.08    1.05
   2   4   8    4.54    0.97
  -2   4  -8    4.20    1.02
   2   4   8    7.16    1.53
  -2   4  -8    3.99    0.80
  -2   4  -8    5.13    1.26
   2   4   8    4.54    0.98
  -4  -4  -8    0.41    0.49
  -4  -4  -8    0.30    0.42
   4  -4   8   -0.41    0.45
   4  -4   8   -0.19    0.30
   4   4   8    1.99    0.92
  -4   4  -8    0.20    0.43
   6  -4   8    7.99    1.13
  -6  -4  -8    8.13    1.42
   6  -4   8    7.31    1.51
  -6   4  -8    6.12    1.09
   6   4   8    3.85    1.24
   8  -4   8    0.22    0.29
   8  -4   8   -0.07    0.62
  -8  -4  -8    0.33    0.48
   8   4   8    0.40    0.80
  -8   4  -8    0.42    0.36
 -10  -4  -8    0.38    0.57
  10  -4   8    0.66    0.29
  10  -4   8   -0.15    0.56
  10   4   8   -0.47    0.62
  12  -4   8    7.19    1.50
  12   4   8    6.70    1.73
  12   4   8    7.09    1.29
  11  -5  -8    4.11    1.58
 -11  -5   8    3.92    0.93
  11   5  -8    2.16    1.24
  -9  -5   8    2.02    0.73
   9  -5  -8    1.84    1.01
   9   5  -8    1.94    1.05
  -7  -5   8    1.64    0.79
   7  -5  -8    2.09    1.03
  -7   5   8    1.59    0.41
  -7   5   8    2.26    0.54
   7   5  -8    1.38    0.99
  -5  -5   8   23.57    2.00
   5  -5  -8   20.53    2.28
  -5   5   8   20.94    1.43
   5   5  -8   22.55    2.59
  -5   5   8   23.75    1.65
   3  -5  -8   35.53    2.18
  -3  -5   8   30.77    2.38
   3  -5  -8   38.74    3.03
  -3   5   8   34.86    2.46
   3   5  -8   37.85    3.31
  -1  -5   8   40.22    2.60
   1  -5  -8   33.03    2.27
   1   5  -8   33.36    2.94
  -1   5   8   38.86    2.64
  -1   5   8   38.64    2.34
  -1   5   8   34.38    3.00
   1  -5   8   61.16    3.37
  -1  -5  -8   55.90    3.22
   1   5   8   61.75    4.08
  -1   5  -8   60.85    3.91
   1   5   8   60.93    3.57
  -1   5  -8   57.57    3.83
   3  -5   8   13.85    1.41
  -3  -5  -8   15.11    1.56
  -3   5  -8   11.97    1.29
  -3   5  -8   13.97    2.22
   3   5   8   12.17    2.24
   5  -5   8   -0.24    0.61
   5  -5   8    1.33    0.56
  -5  -5  -8    1.32    0.63
   5   5   8    1.44    1.10
  -5   5  -8    0.95    0.34
   7  -5   8    4.43    1.31
  -7  -5  -8    3.42    0.89
   7  -5   8    5.19    0.92
  -7   5  -8    2.53    0.66
   7   5   8    3.53    1.25
  -9  -5  -8    0.68    0.57
   9  -5   8    1.64    0.99
   9  -5   8    0.59    0.32
   9   5   8    1.23    1.04
  -9   5  -8    0.19    0.41
 -11  -5  -8    0.05    0.50
  11  -5   8    1.53    0.84
  11  -5   8    0.73    0.28
  11  -5   8    0.40    0.34
  11   5   8    0.07    0.85
 -10  -6   8    7.64    1.39
  10  -6  -8   11.14    2.20
  10   6  -8    8.38    2.03
  -8  -6   8    1.48    0.73
   8  -6  -8    1.00    0.91
  -8   6   8    0.83    0.36
  -8   6   8    0.79    0.30
   8   6  -8    0.66    0.93
  -6  -6   8    2.36    0.90
   6  -6  -8    1.99    0.99
  -6   6   8    1.68    0.40
  -6   6   8    3.02    0.78
   6   6  -8    4.00    1.41
   4  -6  -8    3.58    0.79
   4  -6  -8    3.91    1.45
  -4  -6   8    2.41    0.79
  -4   6   8    4.32    0.79
   4   6  -8    3.79    1.49
  -2  -6   8    4.57    1.10
   2  -6  -8    5.72    1.06
   2   6  -8    6.60    1.61
  -2   6   8    4.74    1.54
   0  -6  -8    0.60    0.43
   0  -6   8    0.51    0.54
   0   6  -8    1.07    0.86
   0   6   8    0.35    0.74
  -2  -6  -8   25.95    2.09
   2  -6   8   29.12    2.15
   2   6   8   19.79    2.81
  -2   6  -8   30.06    2.76
   4  -6   8   27.28    2.09
  -4  -6  -8   27.43    2.26
   4   6   8   27.43    2.97
  -4   6  -8   28.66    2.74
   6  -6   8    4.73    1.36
   6  -6   8    6.38    1.09
  -6  -6  -8    8.74    1.56
   6   6   8    5.84    1.61
   8  -6   8    1.52    0.92
   8  -6   8    3.31    0.69
  -8  -6  -8    2.67    0.81
   8   6   8    0.46    0.91
  -8   6  -8    2.98    0.64
  10  -6   8    4.58    0.70
 -10  -6  -8    4.34    1.03
  10  -6   8    4.83    1.43
  10   6   8    4.62    1.51
   9  -7  -8    6.12    1.58
  -9  -7   8    4.75    1.54
   9   7  -8    5.26    1.64
   7  -7  -8    1.82    0.92
  -7  -7   8    1.58    0.65
  -7   7   8    1.21    0.37
   7   7  -8    0.33    0.89
  -7   7   8    0.33    0.46
   5  -7  -8   14.77    2.50
  -5  -7   8   13.63    1.93
   5   7  -8   13.19    2.53
  -3  -7   8    0.67    0.51
   3  -7  -8    0.22    0.38
   3   7  -8   -0.61    0.55
  -3   7   8    0.60    0.94
  -1  -7   8   12.91    1.91
   1  -7  -8    9.54    1.37
  -1   7   8    9.89    2.25
   1   7  -8    8.32    2.01
   1  -7   8    4.60    1.09
  -1  -7  -8    4.36    1.02
   1   7   8    1.32    1.25
  -1   7  -8    5.78    1.67
   3  -7   8   -0.01    0.43
  -3  -7  -8    0.19    0.48
  -3   7  -8    0.07    0.81
   3   7   8    1.31    1.00
   5  -7   8    6.58    1.17
  -5  -7  -8    6.33    1.29
   5   7   8    6.46    1.81
  -5   7  -8    6.34    1.67
   7  -7   8    2.86    1.26
  -7  -7  -8    2.08    0.65
   7  -7   8    2.36    0.68
   7   7   8    0.46    0.96
  -9  -7  -8    0.87    0.62
   9  -7   8   -0.32    0.74
   9   7   8    0.90    0.95
   8  -8  -8   18.60    2.83
  -8  -8   8   15.54    2.07
  -8   8   8   17.27    1.37
   8   8  -8   14.35    2.67
   6  -8  -8   13.56    2.42
  -4  -8   8    2.64    0.82
   4  -8  -8    3.89    0.93
  -4   8   8    4.85    1.83
   4   8  -8    3.90    1.40
   2  -8  -8   12.95    1.70
  -2  -8   8   11.51    1.73
  -2   8   8    8.35    1.92
   2   8  -8    9.41    2.05
   0  -8   8   -0.03    0.42
   0  -8  -8    0.38    0.49
   0   8  -8    0.33    0.86
   0   8   8    1.39    1.02
   2  -8   8    1.21    0.65
  -2  -8  -8    0.68    0.55
   2   8   8    0.66    0.97
  -2   8  -8   -0.11    0.64
  -4  -8  -8    2.90    1.02
   4  -8   8    2.16    0.67
  -4   8  -8    5.50    1.66
   4   8   8    2.88    1.35
  -6  -8  -8    5.70    1.79
   6  -8   8    9.26    1.37
  -6   8  -8    8.47    1.78
   6   8   8    5.78    1.72
   8  -8   8   12.98    2.27
  -8  -8  -8   18.31    1.82
   8  -8   8   15.94    1.35
   8   8   8   10.11    2.46
   5  -9  -8   15.60    1.42
  -5  -9   8   12.51    1.79
  -5   9   8   15.98    2.75
   5   9  -8   14.42    2.63
  -3  -9   8    7.50    1.57
   3  -9  -8    5.82    1.11
   3   9  -8    6.20    1.71
  -3   9   8    3.87    1.45
  -1  -9   8    0.56    0.54
   1  -9  -8    0.51    0.51
   1   9  -8    2.46    1.12
  -1   9   8   -0.81    0.78
   1  -9   8    0.77    0.62
  -1  -9  -8    0.85    0.60
   1   9   8    1.32    1.11
  -1   9  -8   -0.34    0.74
  -3  -9  -8    2.12    0.81
   3  -9   8    1.00    0.65
   3   9   8    4.25    1.65
   5  -9   8    0.23    0.36
  -5  -9  -8    0.68    0.54
   5   9   8   -0.12    1.03
  -5   9  -8    0.42    0.82
   0 -10   8    2.16    0.80
   0 -10  -8    2.39    0.83
   0  10   8    2.80    1.25
   0  10  -8    1.16    0.86
  14   0  -9    0.42    0.59
  12   0  -9    0.63    0.86
 -12   0   9    0.01    0.22
  12   0  -9    0.40    0.37
  10   0  -9   -0.66    0.23
  10   0  -9   -0.55    0.59
 -10   0   9   -0.02    0.25
   8   0  -9   -0.02    0.26
   8   0  -9    0.25    0.62
  -8   0   9   -0.14    0.21
   6   0  -9    0.37    0.27
   6   0  -9   -0.27    0.42
  -6   0   9    0.20    0.28
  -6   0   9   -0.25    0.34
   4   0  -9    0.01    0.28
   4   0  -9    0.19    0.35
  -4   0   9    0.58    0.45
  -4   0   9   -0.06    0.27
   2   0  -9    0.08    0.34
   2   0  -9    0.07    0.27
  -2   0   9   -0.03    0.33
  -2   0   9   -0.03    0.27
   0   0   9   -0.32    0.42
   0   0   9    0.35    0.21
   0   0  -9    0.67    0.40
   0   0  -9   -0.01    0.14
   2   0   9    0.00    0.38
   2   0   9    0.17    0.12
  -2   0  -9   -0.36    0.24
  -2   0  -9   -0.23    0.12
   4   0   9    0.14    0.29
   4   0   9    0.07    0.42
  -4   0  -9    0.69    0.31
  -4   0  -9   -0.40    0.28
   6   0   9    0.16    0.17
  -6   0  -9    0.33    0.27
   6   0   9   -0.16    0.39
   6   0   9    0.20    0.31
   8   0   9    0.06    0.26
  -8   0  -9   -0.09    0.42
   8   0   9    0.04    0.37
   8   0   9    0.33    0.52
  10   0   9   -0.72    0.44
  10   0   9   -0.31    0.28
  10   0   9    0.69    0.58
  12   0   9   -0.92    0.34
  12   0   9   -0.23    0.61
  14   0   9   -0.11    0.67
  13  -1  -9    0.32    0.60
 -13  -1   9    0.30    0.34
  13   1  -9    0.35    0.44
  13   1  -9    0.84    0.77
  11  -1  -9    2.10    0.98
 -11  -1   9    4.36    0.76
  11   1  -9    1.55    0.91
  11   1  -9    3.91    0.71
   9  -1  -9   12.09    2.08
  -9  -1   9   11.85    1.08
   9  -1  -9   12.84    0.95
   9   1  -9   10.71    2.06
   9   1  -9   10.69    1.06
  -9   1   9   10.93    0.77
   7  -1  -9   53.24    2.66
   7  -1  -9   62.20    3.83
  -7  -1   9   57.17    2.88
   7   1  -9   57.96    2.92
   7   1  -9   57.87    3.82
  -7   1   9   52.70    2.55
  -5  -1   9  105.75    4.67
   5  -1  -9  100.69    5.10
  -5  -1   9  108.64    5.45
   5  -1  -9  101.17    4.47
  -5   1   9  104.26    5.11
   5   1  -9  110.07    5.36
  -5   1   9  103.84    4.52
  -3  -1   9   16.40    1.57
   3  -1  -9   11.89    1.17
  -3  -1   9   14.13    1.38
   3  -1  -9   14.67    1.35
  -3   1   9   13.98    1.27
  -3   1   9   15.79    1.43
   3   1  -9   14.40    1.34
   3   1  -9   14.71    1.44
  -1  -1   9   11.03    1.60
  -1  -1   9   11.84    1.19
   1  -1  -9   12.30    0.94
   1  -1  -9   10.83    1.12
  -1   1   9   10.55    0.85
   1   1  -9   12.27    1.25
   1   1  -9   10.84    1.04
  -1   1   9   13.16    1.36
  -1  -1  -9   41.29    2.39
   1  -1   9   37.29    2.45
   1   1   9   38.16    2.43
   1   1   9   33.28    1.46
  -1   1  -9   40.15    1.82
  -1   1  -9   38.51    2.42
  -1   1  -9   36.42    1.81
   1   1   9   35.37    1.57
   3  -1   9   16.75    1.66
   3  -1   9   18.07    1.26
  -3  -1  -9   16.62    1.20
  -3   1  -9   16.56    1.54
   3   1   9   17.19    1.41
  -3   1  -9   16.28    1.19
   3   1   9   17.99    1.18
   3   1   9   18.04    1.64
   5  -1   9   12.57    1.25
  -5  -1  -9   10.87    1.43
   5  -1   9   14.39    1.83
   5   1   9   13.16    1.28
  -5   1  -9   13.18    1.25
   5   1   9   11.75    1.19
   5   1   9   12.92    1.68
  -5   1  -9   13.09    1.32
  -7  -1  -9    8.26    1.44
   7  -1   9    6.13    1.14
   7  -1   9    7.47    1.27
   7   1   9    5.33    0.97
  -7   1  -9    8.07    1.44
   7   1   9    6.62    1.27
   7   1   9    4.70    0.96
   9  -1   9    9.20    1.42
   9  -1   9    6.67    1.35
   9  -1   9    6.44    1.21
   9   1   9    6.45    1.39
   9   1   9    6.22    1.22
  11  -1   9   10.15    0.97
  11  -1   9   12.04    1.91
  11  -1   9   12.05    1.59
  11   1   9   13.52    2.07
  11   1   9    9.53    1.45
  13  -1   9    1.45    0.50
  13  -1   9    1.23    0.63
  13  -1   9    1.20    1.01
  13   1   9    3.00    1.02
  13   1   9    2.49    0.77
  12  -2  -9   10.74    2.08
 -12  -2   9   11.93    1.15
  12   2  -9   12.08    2.27
  10  -2  -9    9.02    1.86
 -10  -2   9   10.01    1.27
  10   2  -9    8.74    1.89
  10   2  -9    8.07    1.11
  -8  -2   9    1.21    0.58
   8  -2  -9    1.53    0.93
   8   2  -9    0.70    0.66
  -8   2   9    0.66    0.33
  -8   2   9    0.61    0.27
   8   2  -9    0.53    0.39
  -6  -2   9    5.48    0.99
  -6  -2   9    6.65    1.48
   6  -2  -9    5.22    1.23
   6   2  -9    7.13    1.53
  -6   2   9    6.65    0.93
   6   2  -9    3.87    0.82
  -6   2   9    5.27    1.14
  -4  -2   9   53.47    2.93
   4  -2  -9   46.81    3.00
  -4  -2   9   50.91    3.42
  -4   2   9   54.52    2.86
   4   2  -9   52.90    2.88
  -4   2   9   52.37    3.05
   4   2  -9   47.69    3.26
  -2  -2   9   15.40    1.47
   2  -2  -9   13.46    1.25
  -2  -2   9   11.88    1.74
  -2   2   9   14.76    1.36
   2   2  -9   14.17    1.33
   2   2  -9   11.18    1.52
  -2   2   9   12.68    1.16
   0  -2   9   36.91    2.41
   0  -2   9   39.35    2.53
   0   2   9   39.23    2.42
   0   2  -9   43.97    2.54
   0   2   9   40.45    2.06
   0   2  -9   39.63    2.36
   0   2   9   37.24    2.30
  -2  -2  -9   50.06    2.46
   2  -2   9   54.83    3.05
   2   2   9   45.64    2.83
   2   2   9   53.17    2.73
  -2   2  -9   46.26    2.60
  -2   2  -9   51.07    2.92
   2   2   9   48.76    2.74
  -4  -2  -9  144.48    6.25
   4  -2   9  153.90    6.53
   4  -2   9  153.76    6.34
   4   2   9  156.71    6.54
  -4   2  -9  144.00    6.45
  -4   2  -9  151.64    6.36
   4   2   9  145.50    6.34
   4   2   9  150.79    6.36
   6  -2   9   25.94    2.11
   6  -2   9   28.87    2.14
  -6  -2  -9   27.46    2.14
  -6   2  -9   27.60    2.14
  -6   2  -9   28.07    2.04
   6   2   9   32.47    2.32
   6   2   9   32.12    2.11
   6   2   9   28.34    2.15
   8  -2   9    1.28    0.62
   8  -2   9    0.70    0.60
  -8  -2  -9    0.11    0.53
   8   2   9    1.00    0.70
   8   2   9    1.29    0.73
  10  -2   9    3.56    0.85
  10  -2   9    1.46    0.39
  10  -2   9    1.60    0.88
  10   2   9    1.65    0.76
  10   2   9    3.66    1.08
  12  -2   9    0.47    0.61
  12  -2   9    0.34    0.33
  12  -2   9   -0.79    0.35
  12   2   9    0.18    0.65
  12   2   9   -0.16    0.60
  13  -3  -9    9.44    2.06
 -13  -3   9    6.47    1.02
  13   3  -9    4.89    1.62
  11  -3  -9    0.06    0.70
 -11  -3   9   -0.52    0.24
  11   3  -9    0.37    0.57
   9  -3  -9    1.29    0.82
  -9  -3   9   -0.31    0.41
   9   3  -9    0.40    0.79
   7  -3  -9    0.32    0.65
  -7  -3   9    0.73    0.52
  -7   3   9    0.76    0.21
  -7   3   9    0.53    0.30
   7   3  -9    0.86    0.80
  -5  -3   9    4.75    1.03
  -5  -3   9    4.42    1.10
   5  -3  -9    3.16    1.07
  -5   3   9    4.79    0.75
  -5   3   9    3.16    0.87
   5   3  -9    1.94    0.95
  -5   3   9    5.16    0.92
   5   3  -9    5.82    1.11
  -3  -3   9   75.96    4.42
  -3  -3   9   73.10    3.77
   3  -3  -9   66.61    3.80
  -3   3   9   66.95    3.28
  -3   3   9   69.19    3.74
   3   3  -9   74.88    3.72
   3   3  -9   71.99    4.22
  -3   3   9   69.12    3.47
  -1  -3   9  109.28    5.04
   1  -3  -9  107.04    5.02
  -1  -3   9  111.03    5.53
  -1   3   9  107.68    4.76
   1   3  -9  108.82    5.41
  -1   3   9  110.02    4.90
  -1   3   9  105.62    4.80
   1   3  -9   99.80    5.22
   1  -3   9   19.20    1.68
   1   3   9   23.62    1.84
  -1   3  -9   19.15    1.68
   1   3   9   16.61    1.41
  -1   3  -9   18.83    1.62
   1   3   9   17.88    1.75
  -1   3  -9   19.71    1.76
   1   3   9   21.04    1.81
   3  -3   9   47.33    2.85
  -3  -3  -9   48.09    2.80
   3  -3   9   48.88    2.92
  -3   3  -9   48.28    2.96
   3   3   9   49.80    3.15
  -3   3  -9   49.22    2.88
   3   3   9   50.99    2.88
  -5  -3  -9   39.02    2.69
   5  -3   9   45.95    2.64
   5  -3   9   44.53    2.86
  -5   3  -9   42.46    2.66
   5   3   9   38.28    2.84
   7  -3   9    7.38    1.10
   7  -3   9   10.64    1.63
  -7  -3  -9   10.36    1.67
  -7   3  -9    8.33    1.29
   7   3   9    9.60    1.68
   9  -3   9    3.35    0.73
   9  -3   9    3.67    1.09
   9   3   9    2.28    1.04
   9   3   9    2.84    1.01
  11  -3   9    0.39    0.31
  11  -3   9    0.24    0.61
  11  -3   9    1.25    0.48
  11   3   9    1.15    0.87
  11   3   9    1.19    0.65
  13  -3   9    0.85    1.01
  13  -3   9    2.61    0.45
  13   3   9    1.61    0.83
  13   3   9    2.75    0.94
  12  -4  -9    0.20    0.62
 -12  -4   9   -0.19    0.38
  12   4  -9    0.56    0.93
  10  -4  -9    0.27    0.69
 -10  -4   9    0.86    0.57
  10   4  -9    0.80    0.86
   8  -4  -9    0.44    0.71
  -8  -4   9    0.21    0.46
   8   4  -9    0.38    0.74
  -6  -4   9    1.90    0.76
   6  -4  -9    1.23    0.89
  -6   4   9    3.13    0.58
   6   4  -9    3.02    1.13
  -6   4   9    3.75    0.78
  -4  -4   9   25.77    2.09
   4  -4  -9   22.77    2.23
  -4   4   9   25.58    2.19
  -4   4   9   24.57    1.59
   4   4  -9   30.62    2.80
  -4   4   9   26.44    1.82
  -2  -4   9    4.87    1.42
  -2  -4   9    4.03    0.97
   2  -4  -9    3.62    1.08
  -2   4   9    4.42    0.88
  -2   4   9    4.75    1.01
  -2   4   9    2.45    0.81
   2   4  -9    2.07    0.92
   2   4  -9    2.65    0.90
   0  -4   9  322.68   12.55
   0  -4  -9  335.64   12.42
   0   4  -9  333.50   12.58
   0   4   9  335.62   12.59
   0   4  -9  321.47   13.02
   0   4   9  339.24   12.41
   0   4   9  314.96   12.99
   0   4  -9  321.42   13.10
   2  -4   9   58.41    3.29
  -2  -4  -9   56.92    3.26
   2   4   9   54.56    3.65
  -2   4  -9   60.52    3.64
   2   4   9   67.09    3.38
   2   4   9   53.53    3.20
  -2   4  -9   56.85    3.54
  -2   4  -9   61.12    3.30
  -4  -4  -9   10.55    1.58
   4  -4   9   12.57    1.86
  -4  -4  -9    9.70    1.54
   4  -4   9   11.73    1.54
  -4   4  -9   11.53    1.80
  -4   4  -9   10.26    1.43
   4   4   9   11.31    1.92
  -6  -4  -9   17.71    1.73
   6  -4   9   19.04    1.57
  -6  -4  -9   17.42    1.86
   6  -4   9   18.42    1.95
   6   4   9   21.36    2.28
  -6   4  -9   17.44    1.56
   8  -4   9   26.28    1.76
  -8  -4  -9   28.20    2.21
   8  -4   9   24.94    2.34
  -8   4  -9   22.20    1.79
   8   4   9   26.78    2.59
  10  -4   9    1.71    0.54
  10  -4   9    1.11    0.83
  10   4   9    1.84    1.00
  12  -4   9    1.32    0.94
  12  -4   9    1.59    0.36
  12  -4   9    1.76    0.44
  12   4   9    1.13    0.93
  12   4   9    2.22    0.91
  11  -5  -9   -0.37    0.65
 -11  -5   9   -0.12    0.50
  11   5  -9    0.41    0.83
  -9  -5   9    1.01    0.57
   9  -5  -9    0.41    0.79
   9   5  -9    0.60    0.90
  -7  -5   9    0.28    0.56
   7  -5  -9    0.15    0.52
  -7   5   9    0.77    0.40
  -7   5   9    1.15    0.36
   7   5  -9    0.88    1.03
  -5  -5   9    3.15    0.93
   5  -5  -9    1.23    0.78
  -5   5   9    2.18    0.50
   5   5  -9    1.89    1.03
  -5   5   9    3.06    0.74
   3  -5  -9   89.60    5.03
  -3  -5   9   82.51    4.42
  -3   5   9   87.11    4.04
   1  -5  -9   98.74    4.67
  -1   5   9  103.13    5.59
   1   5  -9  104.42    5.59
  -1   5   9   93.65    4.92
  -1   5   9   97.90    4.62
   1  -5   9   36.82    2.50
  -1  -5  -9   30.10    2.27
  -1   5  -9   36.38    2.92
  -1   5  -9   36.80    2.85
   1   5   9   37.32    2.54
   1   5   9   32.34    2.92
   3  -5   9   26.44    2.02
  -3  -5  -9   27.43    2.12
   3   5   9   27.06    2.74
  -3   5  -9   28.22    2.56
   3   5   9   24.15    2.10
   5  -5   9   23.34    1.85
  -5  -5  -9   23.72    2.08
   5  -5   9   28.88    2.57
  -5   5  -9   24.23    1.88
   5   5   9   27.98    2.72
  -7  -5  -9   -0.19    0.48
   7  -5   9    0.73    0.81
   7  -5   9   -0.43    0.33
   7   5   9   -0.86    0.62
  -7   5  -9   -0.42    0.32
   9  -5   9   13.11    1.11
   9  -5   9   12.68    2.03
  -9  -5  -9    8.91    1.41
   9   5   9   13.47    2.23
  -9   5  -9   12.29    1.20
  11  -5   9    2.52    0.81
  11  -5   9    0.83    0.37
  11   5   9    0.13    0.75
 -10  -6   9    1.43    0.70
  10  -6  -9    1.59    1.04
  10   6  -9    1.39    1.04
   8  -6  -9    0.80    0.89
  -8  -6   9    0.88    0.47
  -8   6   9    1.15    0.46
  -8   6   9    0.15    0.24
   8   6  -9    0.63    0.99
   6  -6  -9    0.53    0.72
  -6  -6   9   -0.04    0.58
  -6   6   9    0.62    0.55
   6   6  -9    0.31    0.85
   4  -6  -9   27.95    2.70
  -4  -6   9   26.42    2.23
  -4   6   9   27.00    1.80
   4   6  -9   22.70    2.66
  -2  -6   9    7.65    1.42
   2  -6  -9    9.27    1.31
  -2   6   9   11.56    2.27
   2   6  -9    7.05    1.76
   0  -6   9   42.76    2.84
   0  -6  -9   44.37    2.74
   0   6  -9   40.55    3.36
   0   6   9   42.48    3.50
  -2  -6  -9    1.50    0.69
   2  -6   9    3.29    0.88
  -2   6  -9    3.28    1.20
   2   6   9    1.71    1.07
   4  -6   9   77.86    4.03
  -4  -6  -9   74.14    4.18
   4   6   9   87.81    5.36
  -4   6  -9   80.41    4.94
  -6  -6  -9    0.12    0.36
   6  -6   9    0.11    0.46
   6  -6   9    0.15    0.71
   6   6   9    0.11    0.94
   8  -6   9    0.44    0.42
   8  -6   9    1.06    0.83
  -8  -6  -9    1.94    0.87
   8   6   9    1.20    0.91
  10  -6   9    1.24    0.79
 -10  -6  -9    1.65    0.78
  10  -6   9    0.74    0.42
 -10   6  -9    1.21    0.53
  10   6   9    1.07    1.08
   9  -7  -9    4.10    1.36
  -9  -7   9    5.23    1.31
   9   7  -9    5.51    1.60
  -7  -7   9    8.84    1.70
   7  -7  -9    8.08    1.84
  -7   7   9    6.56    0.88
   7   7  -9    7.71    1.91
  -7   7   9    7.55    1.12
  -5  -7   9   39.64    2.90
   5  -7  -9   36.11    3.25
  -5   7   9   41.58    2.55
   5   7  -9   39.23    3.59
   3  -7  -9    5.98    1.06
  -3  -7   9    3.78    1.09
  -3   7   9    4.07    1.40
   3   7  -9    7.47    1.83
  -1  -7   9    3.11    1.00
   1  -7  -9    1.87    0.66
  -1   7   9    2.97    1.28
   1   7  -9    3.57    1.34
   1  -7   9   30.35    2.33
  -1  -7  -9   31.88    2.36
  -1   7  -9   30.12    2.93
   1   7   9   30.00    3.09
   3  -7   9   16.03    1.63
  -3  -7  -9   15.56    1.68
  -3   7  -9   16.15    2.55
   3   7   9   13.59    2.49
  -5  -7  -9   20.18    2.01
   5  -7   9   20.88    1.76
  -5   7  -9   25.63    2.67
   5   7   9   23.82    3.28
   7  -7   9    6.26    1.07
   7  -7   9    5.43    1.48
  -7  -7  -9    5.31    1.26
   7   7   9    2.12    1.19
   9  -7   9   -0.59    0.71
  -9  -7  -9   -0.01    0.47
   9  -7   9    0.19    0.43
   9   7   9   -1.75    0.66
  -8  -8   9    0.17    0.37
   8  -8  -9    0.27    0.75
   8   8  -9   -0.16    0.83
  -8   8   9    1.00    0.45
   6  -8  -9    3.15    1.26
  -6  -8   9    3.14    0.99
  -6   8   9    6.51    1.16
   6   8  -9    6.50    2.15
  -4  -8   9    5.64    1.30
   4  -8  -9    6.48    1.15
  -4   8   9    3.55    1.50
   4   8  -9    4.40    1.50
   2  -8  -9    4.90    1.00
  -2  -8   9    5.41    1.23
  -2   8   9    9.63    2.22
   2   8  -9    5.65    1.62
   0  -8   9    2.24    0.86
   0  -8  -9    2.00    0.81
   0   8   9    2.86    1.42
   0   8  -9    2.79    1.34
  -2  -8  -9    3.03    0.95
   2  -8   9    2.76    0.90
   2   8   9    2.11    1.28
  -2   8  -9    3.59    1.22
   4  -8   9   14.27    1.55
  -4  -8  -9   13.74    1.87
  -4   8  -9   14.88    2.47
   4   8   9   14.50    2.60
   6  -8   9    0.63    0.51
  -6  -8  -9    0.80    0.58
  -6   8  -9    0.94    1.10
   6   8   9   -0.30    1.00
  -8  -8  -9    0.50    0.55
   8  -8   9   -0.43    0.34
   8   8   9    0.40    0.98
  -5  -9   9    0.35    0.51
  -5   9   9    0.09    0.76
   5   9  -9    0.51    0.93
   3  -9  -9    0.69    0.46
  -3  -9   9    0.98    0.70
   3   9  -9    0.68    0.91
  -3   9   9    2.25    1.11
   1  -9  -9    7.59    1.28
  -1  -9   9   13.10    2.41
  -1   9   9   11.74    2.44
   1   9  -9   15.53    3.96
   1  -9   9    0.53    0.57
  -1  -9  -9   -0.06    0.47
  -1   9  -9    1.12    0.88
   1   9   9    1.19    1.15
   3  -9   9    0.68    0.49
  -3  -9  -9    0.17    0.49
   3   9   9    0.11    0.73
  -3   9  -9    0.96    0.81
  -5  -9  -9    1.87    0.78
   5  -9   9    2.01    0.69
   5   9   9    2.52    1.66
  -5   9  -9    1.51    1.02
  14   0 -10    3.48    1.43
  12   0 -10   57.45    4.11
  12   0 -10   45.62    2.31
 -12   0  10   48.65    2.18
  10   0 -10    6.11    0.91
  10   0 -10    5.11    1.53
 -10   0  10    6.54    0.87
   8   0 -10   83.44    3.74
   8   0 -10   81.17    4.81
  -8   0  10   78.89    3.58
  -6   0  10    0.66    0.50
  -6   0  10    0.15    0.27
   6   0 -10    0.86    0.55
   6   0 -10    0.42    0.27
  -4   0  10    0.53    0.40
   4   0 -10   -0.28    0.30
  -4   0  10    1.18    0.57
   4   0 -10    0.65    0.50
   2   0 -10   42.72    2.58
  -2   0  10   39.81    2.30
   2   0 -10   43.84    2.27
  -2   0  10   40.36    2.63
   0   0 -10   11.95    1.28
   0   0  10   11.94    0.72
   0   0 -10   11.68    0.62
   2   0  10  212.42    8.43
  -2   0 -10  188.40    8.14
  -4   0 -10  256.82    9.65
  -4   0 -10  258.56   10.25
   4   0  10  271.85   10.50
   6   0  10   24.91    1.78
   6   0  10   23.91    1.80
  -6   0 -10   26.19    1.90
   6   0  10   25.94    2.09
   8   0  10   36.59    2.58
   8   0  10   38.20    2.58
  -8   0 -10   36.43    2.58
   8   0  10   36.53    2.27
  10   0  10   37.35    2.65
  10   0  10   37.63    2.79
  12   0  10    0.75    0.72
  12   0  10    0.00    0.51
  14   0  10    8.33    1.32
  14   0  10   10.85    1.80
  13  -1 -10    0.70    0.87
 -13  -1  10    0.06    0.26
  13   1 -10    0.46    0.77
 -11  -1  10   46.61    2.38
  11  -1 -10   41.41    3.43
  11   1 -10   42.87    3.62
  11   1 -10   47.22    2.50
   9  -1 -10   29.95    2.79
  -9  -1  10   35.00    2.02
   9  -1 -10   34.18    1.83
   9   1 -10   30.23    2.87
  -9   1  10   31.80    1.62
  -7  -1  10   40.47    2.37
   7  -1 -10   42.10    2.23
   7  -1 -10   38.75    2.96
  -7   1  10   39.80    2.14
   7   1 -10   43.93    3.16
   7   1 -10   38.50    2.33
  -5  -1  10    1.62    0.66
  -5  -1  10    1.96    0.69
   5  -1 -10    1.85    0.77
   5  -1 -10    1.47    0.55
  -5   1  10    1.11    0.56
  -5   1  10    1.20    0.53
   5   1 -10    2.40    0.96
   3  -1 -10   17.30    1.47
  -3  -1  10   20.49    1.70
  -3  -1  10   18.90    1.74
  -3   1  10   17.86    1.48
   3   1 -10   22.09    1.72
   3   1 -10   20.03    1.59
  -3   1  10   19.05    1.64
   1  -1 -10    4.95    0.67
  -1  -1  10    3.35    0.98
   1  -1 -10    3.78    0.86
  -1  -1  10    5.25    0.95
   1   1 -10    5.37    1.06
   1   1 -10    4.63    0.89
  -1   1  10    4.29    0.63
  -1   1  10    5.06    1.11
   1  -1  10   40.30    2.63
  -1  -1 -10   37.61    2.39
   1   1  10   35.41    1.46
  -1   1 -10   38.31    1.83
  -1   1 -10   38.14    1.80
  -1   1 -10   41.19    2.56
   1   1  10   35.77    2.50
   3  -1  10    2.50    0.93
  -3  -1 -10    0.63    0.27
   3  -1  10    0.30    0.30
  -3   1 -10    0.55    0.46
   3   1  10    0.09    0.21
   3   1  10    0.02    0.47
  -3   1 -10    1.15    0.59
  -5  -1 -10  213.06    8.62
   5  -1  10  218.86    9.10
   5  -1  10  218.20    8.55
  -5   1 -10  228.04    8.96
  -5   1 -10  214.00    8.59
   5   1  10  226.57    8.86
   5   1  10  220.11    8.54
   5   1  10  238.31    9.16
   7  -1  10   12.72    1.42
   7  -1  10   14.97    1.59
  -7  -1 -10   11.86    1.34
   7   1  10   12.29    1.40
  -7   1 -10   12.96    1.38
   7   1  10   12.31    1.66
   7   1  10   12.88    1.25
   9  -1  10   19.43    1.54
   9  -1  10   22.20    1.93
   9  -1  10   21.37    2.02
   9   1  10   23.14    1.98
   9   1  10   25.67    2.20
  11  -1  10   12.77    1.99
  11  -1  10   10.61    1.54
  11  -1  10    9.66    1.00
  11   1  10    9.94    1.69
  11   1  10   11.76    1.72
  13  -1  10   14.89    1.45
  13  -1  10   15.99    2.35
  13   1  10   16.59    2.34
  13   1  10   15.90    1.68
  12  -2 -10    8.97    1.91
 -12  -2  10   11.07    1.14
  12   2 -10    6.48    1.69
  10  -2 -10    2.73    1.24
 -10  -2  10    1.56    0.65
  10   2 -10    4.90    1.37
  -8  -2  10   17.14    1.45
   8  -2 -10   14.55    2.14
   8   2 -10   20.33    2.74
   8   2 -10   16.46    1.43
  -8   2  10   13.37    0.94
  -8   2  10   15.88    1.00
  -6  -2  10   10.73    1.46
  -6  -2  10    9.44    1.91
   6  -2 -10    9.35    1.54
   6   2 -10   10.52    1.81
   6   2 -10    8.03    1.27
  -6   2  10    9.80    1.55
  -6   2  10    8.96    1.21
   4  -2 -10   24.99    2.04
  -4  -2  10   26.50    2.32
  -4  -2  10   29.15    2.08
  -4   2  10   24.68    1.96
   4   2 -10   27.90    2.26
   4   2 -10   26.99    2.28
  -4   2  10   24.20    1.85
  -2  -2  10   21.64    1.84
   2  -2 -10   21.01    1.57
  -2  -2  10   19.31    1.88
   2   2 -10   20.21    1.70
  -2   2  10   20.20    1.72
  -2   2  10   18.50    1.42
   2   2 -10   24.04    1.89
   0  -2  10   55.22    3.30
   0   2  10   63.85    3.23
   0   2 -10   64.96    3.17
   0   2  10   61.54    3.34
   0   2  10   55.56    2.67
   0   2  10   58.01    2.91
   0   2 -10   57.25    3.26
   2  -2  10    0.51    0.42
   2   2  10    0.22    0.31
  -2   2 -10   -0.14    0.32
   2   2  10    0.37    0.37
   2   2  10    0.36    0.31
   2   2  10    0.41    0.55
  -2   2 -10    0.67    0.26
  -2   2 -10    0.55    0.34
   4  -2  10   24.57    2.01
  -4  -2 -10   24.35    1.71
   4  -2  10   22.58    1.75
   4   2  10   25.98    2.02
   4   2  10   23.36    1.83
   4   2  10   23.96    1.75
  -4   2 -10   22.87    1.72
  -4   2 -10   22.67    1.86
   6  -2  10   56.53    3.22
  -6  -2 -10   57.63    3.27
   6  -2  10   60.63    3.37
   6   2  10   65.21    3.49
   6   2  10   52.74    3.20
  -6   2 -10   57.59    3.28
   8  -2  10   22.64    2.03
   8  -2  10   17.26    1.68
  -8  -2 -10   22.41    2.00
   8   2  10   20.70    1.91
  -8   2 -10   17.86    1.57
   8   2  10   22.84    1.99
  10  -2  10   28.14    2.00
  10  -2  10   28.24    2.42
  10  -2  10   22.75    1.59
  10   2  10   25.63    2.14
  10   2  10   28.90    2.50
  12  -2  10    2.34    0.96
  12  -2  10    1.53    0.51
  12  -2  10    0.64    0.45
  12   2  10    3.16    1.17
  12   2  10    1.86    0.83
  13  -3 -10    9.81    2.00
 -13  -3  10   11.22    1.42
  13   3 -10   13.74    2.50
  11  -3 -10   -0.89    0.53
 -11  -3  10    0.29    0.37
  11   3 -10   -0.85    0.68
   9  -3 -10    4.94    1.50
  -9  -3  10    3.55    0.88
   9   3 -10    3.29    1.21
  -7  -3  10  102.54    4.67
   7  -3 -10   94.66    5.23
  -7   3  10   97.23    3.82
   7   3 -10   99.94    5.65
  -7   3  10   86.27    3.99
  -5  -3  10   31.84    2.25
   5  -3 -10   26.16    2.36
  -5  -3  10   35.80    2.94
   5   3 -10   35.56    2.84
  -5   3  10   29.12    1.75
  -5   3  10   30.35    1.99
   5   3 -10   27.74    2.28
  -5   3  10   24.54    2.14
  -3  -3  10    0.20    0.58
  -3  -3  10    0.65    0.39
   3  -3 -10    0.58    0.46
   3   3 -10    0.99    0.46
  -3   3  10    0.46    0.46
   3   3 -10    0.21    0.66
  -3   3  10    0.84    0.43
  -3   3  10    0.54    0.48
  -1  -3  10    8.04    1.22
   1  -3 -10   11.28    1.25
  -1  -3  10    9.49    1.57
   1   3 -10   12.13    1.76
  -1   3  10    9.76    1.34
  -1   3  10   10.20    1.08
   1   3 -10    8.90    1.33
  -1   3  10   10.56    1.12
   1  -3  10   14.52    1.52
   1   3  10   13.80    1.52
   1   3  10   16.73    1.46
  -1   3 -10   15.18    1.47
  -1   3 -10   14.22    1.43
   1   3  10   13.18    1.45
  -1   3 -10   13.59    1.43
   1   3  10   12.28    1.18
  -3  -3 -10   11.71    1.20
   3  -3  10   11.46    1.33
   3  -3  10   13.31    1.46
   3   3  10   14.29    1.55
  -3   3 -10   14.16    1.43
   3   3  10   10.72    1.58
   3   3  10   13.66    1.35
  -3   3 -10   12.11    1.33
   5  -3  10    3.61    1.05
   5  -3  10    4.81    0.99
  -5  -3 -10    5.10    1.10
   5   3  10    3.04    0.89
   5   3  10    5.57    1.27
  -5   3 -10    2.63    0.80
  -5   3 -10    4.20    0.98
   7  -3  10   14.95    1.48
  -7  -3 -10   15.03    1.61
   7  -3  10   14.10    1.58
  -7   3 -10   13.70    1.37
   7   3  10   19.67    1.84
   7   3  10   16.68    2.19
   9  -3  10   65.22    3.98
   9  -3  10   68.24    3.43
   9   3  10   71.95    4.24
  -9   3 -10   65.02    3.38
   9   3  10   67.30    3.83
  11  -3  10    0.52    0.80
  11  -3  10    0.03    0.39
  11  -3  10    0.49    0.40
  11   3  10    1.10    0.86
  11   3  10   -0.13    0.45
  13  -3  10   -0.82    0.53
  13  -3  10    0.14    0.35
  13   3  10   -0.37    0.45
  13   3  10   -0.30    0.72
  12  -4 -10    2.17    0.96
 -12  -4  10    1.79    0.69
  12   4 -10    0.79    0.91
  10  -4 -10    0.06    0.59
 -10  -4  10    0.53    0.49
  10   4 -10   -0.47    0.50
   8  -4 -10    2.31    1.09
  -8  -4  10    2.61    0.88
   8   4 -10    0.88    0.99
  -8   4  10    2.92    0.42
  -6  -4  10    6.84    1.25
   6  -4 -10   10.38    1.86
  -6   4  10    8.03    0.73
  -6   4  10    9.44    1.22
   6   4 -10    8.34    1.79
   4  -4 -10    4.65    1.18
  -4   4  10    2.65    0.56
   4   4 -10    2.13    0.98
  -4   4  10    3.09    0.88
  -4   4  10    3.77    0.94
   2  -4 -10   -0.20    0.45
  -2  -4  10   -0.86    0.47
  -2  -4  10   -0.09    0.46
  -2   4  10   -0.09    0.31
  -2   4  10   -0.25    0.33
   2   4 -10    0.45    0.75
  -2   4  10   -0.09    0.25
   0  -4  10   26.82    2.13
   0   4  10   29.27    2.42
   0   4  10   28.57    2.03
   0   4  10   28.97    2.08
   0   4 -10   30.15    2.21
   0   4 -10   29.66    2.44
   0   4 -10   32.67    2.53
  -2  -4 -10    2.72    0.73
   2  -4  10    4.06    1.01
   2   4  10    6.22    1.16
   2   4  10    8.32    1.59
  -2   4 -10    4.63    1.21
  -2   4 -10    5.87    1.19
  -4  -4 -10   17.79    1.65
   4  -4  10   18.24    1.85
  -4  -4 -10   16.84    1.66
   4  -4  10   19.25    1.68
   4   4  10   20.73    2.11
  -4   4 -10   18.69    1.68
  -6  -4 -10    6.33    1.29
  -6  -4 -10    5.29    1.18
   6  -4  10    7.71    1.52
   6  -4  10    7.08    1.14
   6   4  10    7.75    1.70
  -6   4 -10    6.12    1.11
   8  -4  10    5.27    0.94
   8  -4  10    2.40    0.93
   8   4  10    3.83    1.15
  -8   4 -10    2.84    0.86
  10  -4  10    4.42    1.29
  10  -4  10    4.27    0.77
  10   4  10    3.16    1.18
  10   4  10    3.74    1.01
  12  -4  10   -0.28    0.27
  12  -4  10   -0.34    0.44
  12  -4  10   -0.04    0.58
  12   4  10   -0.79    0.46
  12   4  10    0.76    0.82
  11  -5 -10    2.50    1.03
 -11  -5  10    4.28    0.99
  11   5 -10    4.04    1.28
  -9  -5  10    6.97    1.26
   9  -5 -10    5.18    1.41
   9   5 -10    8.41    2.08
   7  -5 -10   11.76    2.18
  -7  -5  10    8.57    1.48
  -7   5  10    9.28    0.77
  -7   5  10    9.66    0.99
   7   5 -10    8.07    1.88
  -5  -5  10   21.61    1.98
   5  -5 -10   26.01    2.52
  -5   5  10   24.38    1.58
  -5   5  10   27.46    1.90
   5   5 -10   23.01    2.59
   3  -5 -10   20.65    2.14
  -3  -5  10   17.46    1.76
  -3   5  10   13.78    1.49
   3   5 -10   18.24    3.10
  -3   5  10   15.29    1.33
  -1  -5  10    8.80    1.58
  -1   5  10    8.99    1.75
   1   5 -10    8.68    1.70
  -1   5  10   11.03    1.71
  -1  -5 -10    5.30    1.37
   1   5  10    4.49    1.07
  -1   5 -10    6.57    1.39
  -1   5 -10    4.59    1.12
   1   5  10    4.97    1.26
  -3  -5 -10    1.78    0.68
   3  -5  10    1.41    0.56
  -3   5 -10    2.87    1.10
   3   5  10    1.91    0.66
   3   5  10    2.25    1.06
   5  -5  10    5.60    1.45
  -5  -5 -10    7.11    1.44
   5  -5  10    6.24    1.13
   5   5  10    6.95    1.64
   7  -5  10    6.06    1.02
  -7  -5 -10    4.82    1.11
   7  -5  10    5.57    1.25
   7   5  10    8.29    1.78
   9  -5  10    2.55    1.09
  -9  -5 -10    4.28    1.07
   9  -5  10    3.56    0.75
  -9   5 -10    2.49    0.64
   9   5  10    3.66    1.30
  11  -5  10   12.12    1.03
  11  -5  10   12.34    2.14
  11   5  10   11.81    2.01
  10  -6 -10    2.88    1.13
 -10  -6  10    2.13    0.79
  10   6 -10    0.78    1.01
  -8  -6  10    0.59    0.70
   8  -6 -10    0.39    0.58
  -8   6  10    0.32    0.26
   8   6 -10    1.64    1.17
  -8   6  10    0.07    0.33
  -6  -6  10    0.96    0.67
   6  -6 -10    1.53    0.85
   6   6 -10    0.58    0.85
  -6   6  10    1.84    0.48
  -6   6  10    0.92    0.54
  -4  -6  10   20.69    2.00
   4  -6 -10   22.39    2.41
  -4   6  10   24.09    1.93
   4   6 -10   22.32    2.57
  -2  -6  10   33.88    2.46
   2  -6 -10   30.71    2.54
  -2   6  10   28.27    2.97
   2   6 -10   28.52    2.92
   0  -6 -10   13.82    1.52
   0  -6  10   16.12    2.03
   0   6  10   16.91    2.56
   0   6 -10   10.95    1.95
   2  -6  10    1.51    0.71
  -2  -6 -10    1.80    0.82
   2   6  10    1.67    0.96
  -2   6 -10    1.54    0.98
   4  -6  10    7.37    1.28
  -4  -6 -10    4.63    1.08
   4   6  10    6.51    1.75
  -4   6 -10    4.51    1.38
   6  -6  10   11.12    1.89
  -6  -6 -10   11.87    1.81
   6  -6  10    8.80    1.36
   6   6  10    8.39    1.91
  -8  -6 -10    3.60    0.98
   8  -6  10    2.39    1.06
   8   6  10    2.74    1.31
  10  -6  10   -0.35    0.31
  10  -6  10    0.63    0.77
  10   6  10    0.44    0.83
  -9  -7  10    3.20    1.01
   9  -7 -10    5.37    1.49
   9   7 -10    4.81    1.52
   7  -7 -10    2.31    1.06
  -7  -7  10    1.20    0.75
   7   7 -10    0.56    0.98
  -7   7  10    0.88    0.44
  -7   7  10    2.25    0.70
  -5  -7  10    1.57    0.74
   5  -7 -10    2.84    1.06
  -5   7  10    1.46    0.69
   5   7 -10    1.90    1.21
  -3  -7  10   -0.30    0.38
  -3   7  10    1.05    1.07
   3   7 -10   -0.43    0.75
  -1  -7  10    5.63    1.20
   1  -7 -10    5.99    1.21
   1   7 -10    9.94    2.09
  -1   7  10    9.35    2.14
  -1  -7 -10    4.67    1.07
   1  -7  10    6.99    1.37
   1   7  10    6.80    1.66
  -1   7 -10    4.82    1.35
   3  -7  10    0.87    0.57
  -3  -7 -10    1.38    0.74
   3   7  10    0.35    0.90
  -3   7 -10    2.07    1.10
  -5  -7 -10    4.52    1.16
   5  -7  10    6.05    1.13
  -5   7 -10    4.57    1.53
   5   7  10    7.16    1.87
   7  -7  10    0.50    0.72
  -7  -7 -10   -0.01    0.40
   7  -7  10    0.85    0.50
   7   7  10   -0.55    0.80
   9  -7  10    4.56    1.59
  -9  -7 -10    1.99    0.80
   9  -7  10    2.83    0.66
   9   7  10    3.23    1.24
  -8  -8  10    9.02    1.56
   8  -8 -10    7.98    1.83
   8   8 -10    8.67    2.16
  -8   8  10   10.34    1.04
   6  -8 -10    5.42    1.46
  -6  -8  10    5.89    1.22
  -6   8  10    8.44    1.36
   6   8 -10    7.36    1.85
  -4  -8  10    0.74    0.69
   4   8 -10    1.33    1.07
  -4   8  10    2.37    1.21
  -2  -8  10    0.98    0.63
   2  -8 -10    0.95    0.62
  -2   8  10    1.20    1.07
   2   8 -10    0.97    1.02
   0  -8  10   15.04    2.10
   0  -8 -10   13.65    1.84
   0   8  10   13.80    2.63
   0   8 -10   11.88    2.28
  -2  -8 -10   36.04    2.64
   2  -8  10   36.45    2.66
   2   8  10   43.03    3.74
  -2   8 -10   36.02    3.33
   4  -8  10   23.62    1.93
  -4  -8 -10   21.92    2.04
  -4   8 -10   20.90    2.94
   4   8  10   24.71    2.78
  -6  -8 -10    0.14    0.50
   6  -8  10    0.21    0.39
   6   8  10   -1.42    0.79
  -6   8 -10   -1.53    0.49
   8  -8  10    0.78    0.44
  -8  -8 -10    1.02    0.75
   8   8  10    0.75    1.12
  -5  -9  10    0.08    0.56
   5   9 -10   -0.14    0.82
  -5   9  10   -1.36    0.60
  -5   9  10    0.08    0.41
   3  -9 -10    1.66    0.70
  -3  -9  10    1.74    0.80
  -3   9  10    1.71    0.89
   3   9 -10    2.07    1.01
  -1  -9  10    0.82    0.61
   1  -9 -10    0.80    0.52
  -1   9  10    0.13    0.94
   1  -9  10    4.62    1.11
  -1  -9 -10    2.35    0.80
  -1   9 -10    3.79    2.27
   1   9  10    1.82    1.23
   3  -9  10    3.13    0.97
  -3  -9 -10    1.35    0.76
  -3   9 -10    2.27    1.22
   3   9  10    2.04    1.23
  -5  -9 -10   19.42    1.92
   5  -9  10   18.03    1.69
  -5   9 -10   20.32    3.06
   5   9  10   15.30    2.98
  12   0 -11   -0.70    0.35
  12   0 -11   -0.28    0.44
 -12   0  11    0.10    0.24
 -10   0  11    0.06    0.33
  10   0 -11   -0.95    0.33
  10   0 -11    0.32    0.67
   8   0 -11   -0.45    0.46
   8   0 -11    0.54    0.43
  -8   0  11    0.28    0.30
   6   0 -11   -0.24    0.54
  -6   0  11    0.34    0.40
  -6   0  11   -0.28    0.31
   6   0 -11    0.30    0.36
   4   0 -11    0.21    0.14
  -4   0  11   -0.04    0.32
   4   0 -11    0.38    0.41
  -4   0  11    0.42    0.31
   2   0 -11    0.80    0.51
  -2   0  11    0.17    0.46
  -2   0  11    0.39    0.34
   2   0 -11   -0.06    0.17
   0   0  11   -0.02    0.16
   0   0 -11    0.59    0.38
   0   0 -11    0.04    0.13
   0   0  11    0.11    0.36
  -2   0 -11    0.03    0.38
   2   0  11    0.24    0.49
  -4   0 -11    0.26    0.43
  -4   0 -11    0.36    0.25
   4   0  11   -0.36    0.38
   4   0  11    0.20    0.22
   6   0  11   -0.06    0.22
  -6   0 -11    0.35    0.33
   6   0  11    1.02    0.58
   8   0  11   -0.26    0.54
  -8   0 -11   -0.28    0.27
   8   0  11   -0.87    0.31
   8   0  11    0.17    0.51
  10   0  11    0.14    0.59
  12   0  11    1.39    0.65
  12   0  11   -0.06    0.73
 -13  -1  11    5.73    0.81
  13  -1 -11    5.43    1.45
  13   1 -11    4.39    1.49
  11  -1 -11    9.86    2.01
 -11  -1  11   11.16    1.03
  11   1 -11    9.39    2.01
  11   1 -11    9.51    1.01
   9  -1 -11    9.03    1.75
  -9  -1  11    7.20    1.08
   9  -1 -11    7.93    1.00
   9   1 -11    6.77    1.11
   9   1 -11    6.04    1.43
  -9   1  11    6.72    0.86
   7  -1 -11    0.56    0.42
  -7  -1  11    2.34    0.71
   7  -1 -11    2.74    1.08
  -7   1  11    2.22    0.55
   7   1 -11    1.20    0.86
   7   1 -11    1.27    0.48
   5  -1 -11    3.94    1.00
   5  -1 -11    2.77    0.70
  -5  -1  11    2.80    0.77
   5   1 -11    2.91    0.91
  -5   1  11    5.53    1.18
  -5   1  11    3.03    0.81
  -3  -1  11    7.90    1.24
  -3  -1  11    8.36    1.40
   3  -1 -11    7.13    1.08
   3   1 -11    7.43    1.19
   3   1 -11    6.28    1.13
  -3   1  11   11.29    1.66
  -3   1  11    9.16    1.02
   1  -1 -11   25.54    1.93
   1  -1 -11   28.53    1.52
  -1  -1  11   23.84    1.74
  -1   1  11   30.70    2.26
  -1   1  11   24.20    1.43
   1   1 -11   26.55    1.99
  -1  -1 -11   93.70    4.48
   1  -1  11   90.04    4.65
   1   1  11   93.16    4.61
  -1   1 -11   86.73    4.49
  -1   1 -11   92.27    3.62
  -1   1 -11   89.70    3.56
   3  -1  11   43.25    2.84
   3  -1  11   38.38    1.95
  -3  -1 -11   41.52    1.87
   3   1  11   36.37    1.76
   3   1  11   42.00    2.73
  -3   1 -11   40.51    2.21
  -3   1 -11   37.45    2.60
   5  -1  11   31.96    2.05
  -5  -1 -11   31.99    2.06
   5  -1  11   37.93    2.64
   5   1  11   35.14    2.31
   5   1  11   35.40    2.53
  -5   1 -11   34.63    2.40
  -5   1 -11   36.16    2.13
   5   1  11   36.64    2.08
  -7  -1 -11   11.18    1.60
   7  -1  11   12.79    1.37
   7  -1  11    9.40    1.57
  -7   1 -11   10.24    1.17
   7   1  11   10.70    1.71
   7   1  11   11.02    1.50
   9  -1  11    7.24    1.10
   9  -1  11    9.22    1.53
   9  -1  11    6.43    1.19
   9   1  11    6.27    1.32
   9   1  11    6.07    1.32
  11  -1  11    8.21    1.64
  11  -1  11    7.60    1.33
  11   1  11    7.32    1.32
  11   1  11    6.83    1.36
  13  -1  11    7.36    1.59
  13   1  11    5.64    1.36
  13   1  11    5.22    1.13
  12  -2 -11   -0.18    0.76
 -12  -2  11    0.74    0.57
  12   2 -11   -0.89    0.46
  10  -2 -11   21.11    2.38
 -10  -2  11   23.13    1.70
  10   2 -11   17.32    2.65
  -8  -2  11   21.44    1.70
   8  -2 -11   22.05    2.23
  -8   2  11   19.64    1.30
   8   2 -11   18.61    2.14
   8   2 -11   23.26    2.01
   6  -2 -11    9.60    1.00
  -6  -2  11   12.86    1.70
   6  -2 -11   11.94    1.80
   6   2 -11   12.44    2.04
  -6   2  11   11.11    1.73
  -6   2  11    9.77    1.31
   6   2 -11   10.17    1.39
  -4  -2  11    4.48    1.10
   4  -2 -11    5.69    0.99
   4  -2 -11    4.94    1.11
  -4  -2  11    4.87    1.07
  -4   2  11    5.46    1.14
   4   2 -11    4.49    1.00
  -4   2  11    2.71    0.79
   4   2 -11    4.41    1.15
  -2  -2  11  135.19    6.26
  -2  -2  11  139.52    6.19
   2  -2 -11  134.54    5.70
  -2   2  11  128.64    5.61
   2   2 -11  144.00    6.12
  -2   2  11  134.44    6.04
   2   2 -11  141.63    6.09
   0  -2  11   57.30    3.47
   0   2  11   58.21    2.79
   0   2  11   65.48    3.37
   0   2  11   67.45    3.56
   0   2 -11   65.77    3.22
   0   2  11   63.51    3.01
   0   2 -11   64.10    3.91
   2  -2  11    4.21    1.04
   2   2  11    4.33    0.73
  -2   2 -11    4.84    0.81
  -2   2 -11    5.45    1.32
   2   2  11    3.07    0.59
  -2   2 -11    4.42    0.81
   2   2  11    2.65    0.82
   2   2  11    2.51    0.67
   4  -2  11    1.87    0.60
   4  -2  11    1.35    0.69
  -4  -2 -11    1.53    0.43
   4   2  11    2.63    0.62
   4   2  11    0.98    0.67
   4   2  11    1.07    0.51
  -4   2 -11    1.62    0.55
  -4   2 -11    1.37    0.59
   6  -2  11    0.62    0.51
  -6  -2 -11    0.23    0.41
   6  -2  11    0.75    0.62
  -6   2 -11    0.59    0.46
   6   2  11    1.25    0.65
   6   2  11    0.87    0.49
  -6   2 -11    0.84    0.42
   8  -2  11    7.29    1.35
  -8  -2 -11    6.77    1.35
   8  -2  11    5.27    1.12
  -8   2 -11    7.75    1.59
  -8   2 -11    7.96    1.28
   8   2  11    5.14    1.14
   8   2  11    5.00    1.16
  10  -2  11    2.31    0.89
  10  -2  11    3.68    0.91
  10  -2  11    3.37    0.68
  10   2  11    3.52    1.00
  10   2  11    4.08    1.08
  12  -2  11    3.70    0.69
  12  -2  11    4.76    1.21
  12  -2  11    2.55    0.73
  12   2  11    5.18    1.27
  12   2  11    4.71    1.13
  13  -3 -11    0.60    0.87
 -13  -3  11    0.10    0.38
  13   3 -11   -0.18    0.64
 -11  -3  11    1.99    0.71
  11  -3 -11    2.43    1.12
  11   3 -11    2.40    1.19
   9  -3 -11   15.40    2.43
  -9  -3  11   13.00    1.68
   9   3 -11   10.61    2.14
   7  -3 -11   35.40    2.81
  -7   3  11   32.94    1.80
  -7   3  11   35.41    2.04
   7   3 -11   40.95    3.26
   5  -3 -11   12.19    1.82
  -5  -3  11   12.23    1.70
  -5   3  11    9.47    0.95
  -5   3  11   12.95    1.63
   5   3 -11   10.49    1.78
  -5   3  11   11.03    1.52
   3  -3 -11   82.97    4.52
  -3  -3  11   95.11    4.68
  -3  -3  11  103.12    5.91
  -3   3  11   91.87    4.23
   3   3 -11   93.85    4.97
  -3   3  11   93.20    4.51
  -3   3  11   94.44    4.50
   3   3 -11   89.67    4.52
   1  -3 -11    3.40    0.89
  -1  -3  11    4.76    1.12
  -1  -3  11    4.12    1.02
  -1   3  11    3.04    0.84
  -1   3  11    3.50    0.91
   1   3 -11    3.20    0.79
  -1   3  11    3.85    0.79
   1   3 -11    5.77    1.26
   1  -3  11   15.81    1.67
  -1   3 -11   17.97    1.63
   1   3  11   16.87    1.32
   1   3  11   16.14    1.56
  -1   3 -11   17.19    1.60
  -1   3 -11   18.29    1.61
   1   3  11   18.92    1.74
   1   3  11   17.92    1.55
   3  -3  11    3.17    0.91
  -3  -3 -11    3.21    0.74
  -3   3 -11    4.85    1.05
   3   3  11    5.59    1.20
   3   3  11    3.76    0.95
  -3   3 -11    5.85    1.11
  -3   3 -11    6.81    1.26
  -5  -3 -11   -0.41    0.33
   5  -3  11    0.05    0.49
   5  -3  11    0.13    0.48
  -5   3 -11   -0.47    0.34
   5   3  11    0.89    0.64
  -5   3 -11   -0.12    0.33
   5   3  11   -0.11    0.37
  -7  -3 -11   18.32    1.77
   7  -3  11   14.90    1.66
   7  -3  11   16.21    1.60
   7   3  11   17.71    1.78
   7   3  11   16.77    1.82
  -7   3 -11   16.98    1.75
  -7   3 -11   12.83    1.39
   9  -3  11   17.42    1.55
   9  -3  11   19.10    1.93
   9   3  11   19.12    1.95
  -9   3 -11   16.84    1.49
   9   3  11   20.29    2.01
  11  -3  11    4.13    1.13
  11  -3  11    1.99    0.50
  11  -3  11    0.93    0.55
  11   3  11    1.85    0.66
  11   3  11    2.41    1.03
  13  -3  11    4.32    1.20
  13  -3  11    3.86    0.71
  13   3  11    5.81    1.51
  13   3  11    2.21    0.87
  12  -4 -11    0.94    0.67
 -12  -4  11    0.65    0.43
  12   4 -11   -0.86    0.51
 -10  -4  11    4.90    1.07
  10  -4 -11    1.86    1.08
  10   4 -11    3.00    1.15
  -8  -4  11   -0.12    0.42
   8  -4 -11    0.95    0.82
  -8   4  11    0.34    0.27
  -8   4  11    0.15    0.20
   8   4 -11   -0.36    0.55
  -6  -4  11  127.90    5.93
   6  -4 -11  136.17    6.48
  -6   4  11  123.34    5.13
   6   4 -11  130.29    6.81
  -6   4  11  124.18    5.47
   4  -4 -11   59.46    3.73
  -4  -4  11   57.70    3.49
  -4   4  11   63.40    3.32
   4   4 -11   63.23    4.13
  -4   4  11   58.71    3.53
  -4   4  11   58.70    3.00
   2  -4 -11   16.92    1.73
  -2  -4  11   17.93    1.77
  -2  -4  11   18.23    2.08
  -2   4  11   18.88    1.56
   2   4 -11   16.04    2.18
  -2   4  11   16.07    1.57
  -2   4  11   20.07    1.68
   0  -4  11    7.25    1.34
   0   4 -11   10.40    1.65
   0   4  11    6.96    1.45
   0   4  11   10.73    1.16
   0   4  11    8.40    1.36
   0   4  11    8.34    1.44
   2  -4  11   31.77    2.34
  -2   4 -11   33.51    2.88
   2   4  11   29.96    2.47
  -2   4 -11   28.45    2.34
   2   4  11   32.65    2.42
   2   4  11   31.14    2.08
  -4  -4 -11    0.06    0.37
   4  -4  11   -0.09    0.46
   4  -4  11   -0.06    0.41
  -4   4 -11   -0.72    0.39
  -4   4 -11    0.67    0.54
   4   4  11    0.58    0.75
   6  -4  11    3.43    0.83
  -6  -4 -11    2.77    0.88
   6  -4  11    3.57    1.11
  -6   4 -11    4.06    1.17
   6   4  11    2.36    0.88
   8  -4  11   -0.22    0.46
   8  -4  11    0.25    0.45
   8   4  11   -0.59    0.53
   8   4  11    0.37    0.54
  -8   4 -11   -0.03    0.40
  10  -4  11   44.23    3.19
  10  -4  11   47.60    2.51
 -10   4 -11   36.27    2.39
  10   4  11   47.06    3.36
  10   4  11   45.58    3.06
  12  -4  11    5.28    0.83
  12  -4  11    7.33    1.50
  12   4  11    7.03    1.34
  12   4  11    5.20    1.41
  11  -5 -11    1.57    0.79
 -11  -5  11    1.38    0.68
  11   5 -11    0.99    0.97
  -9  -5  11    9.76    1.60
   9  -5 -11   11.30    2.03
   9   5 -11    8.96    2.03
  -7  -5  11   46.52    3.10
   7  -5 -11   45.64    3.47
  -7   5  11   47.24    2.29
   7   5 -11   51.13    3.93
  -7   5  11   45.48    2.55
  -5  -5  11    3.65    1.03
   5  -5 -11    3.90    1.21
  -5   5  11    4.82    0.79
   5   5 -11    7.34    1.71
  -5   5  11    3.77    0.90
  -3  -5  11   76.12    4.35
   3  -5 -11   84.22    4.79
  -3   5  11   88.86    4.27
   3   5 -11   78.88    4.93
  -3   5  11   82.00    3.96
  -1  -5  11   -0.02    0.44
  -1   5  11    0.35    0.48
   1   5 -11    0.22    0.62
  -1   5  11   -0.10    0.61
  -1   5  11   -0.01    0.38
   1  -5  11   17.42    2.25
  -1   5 -11   17.64    2.44
   1   5  11   18.74    2.09
   1   5  11   15.54    1.52
  -1   5 -11   16.30    2.54
  -3  -5 -11   11.58    1.66
   3  -5  11   13.85    1.48
   3   5  11   13.61    2.16
  -3   5 -11   14.33    2.10
   3   5  11   14.07    1.48
   5  -5  11    6.32    1.43
  -5  -5 -11    6.78    1.35
   5   5  11    8.53    1.69
  -7  -5 -11    6.23    1.22
   7  -5  11   12.31    1.30
   7  -5  11   10.14    1.84
   7   5  11   12.95    2.19
   9  -5  11   13.76    1.25
   9  -5  11   15.34    2.17
   9   5  11   15.64    2.30
  11  -5  11    3.58    1.12
  11  -5  11    3.55    0.70
  11   5  11    2.45    0.89
  11   5  11    5.20    1.36
  10  -6 -11    4.46    1.28
 -10  -6  11    5.02    1.11
  10   6 -11    3.87    1.57
   8  -6 -11    8.48    1.90
  -8  -6  11   10.00    1.59
  -8   6  11   13.66    1.09
   8   6 -11   12.39    2.27
  -8   6  11    9.63    0.85
   6  -6 -11   15.18    2.45
  -6  -6  11   17.68    1.79
  -6   6  11   10.96    1.05
   6   6 -11   16.69    2.57
  -6   6  11   13.54    1.41
   4  -6 -11    0.26    0.61
  -4  -6  11    0.62    0.61
  -4   6  11    0.48    0.58
   4   6 -11    0.00    0.69
  -2  -6  11   69.09    4.04
  -2   6  11   72.92    4.77
   2   6 -11   74.50    4.75
   0  -6  11    6.30    1.36
   0  -6 -11    5.16    1.02
   0   6 -11    7.10    1.61
   0   6  11   10.24    2.11
  -2  -6 -11   -0.11    0.35
   2  -6  11    0.35    0.55
   2   6  11    0.84    0.82
  -2   6 -11    0.13    0.73
   4  -6  11    8.32    1.45
  -4  -6 -11    6.15    1.24
   4   6  11    6.06    1.60
  -4   6 -11    6.18    1.55
  -6  -6 -11    2.17    0.89
   6  -6  11    1.86    0.74
   6  -6  11    1.98    0.97
   6   6  11    2.09    1.15
  -8  -6 -11    2.35    1.00
   8  -6  11    2.02    0.69
   8  -6  11    1.60    0.85
   8   6  11    2.84    1.11
  10  -6  11    8.90    1.72
  10   6  11    6.77    1.70
   9  -7 -11    1.36    0.82
  -9  -7  11    1.95    0.87
   9   7 -11    0.95    0.86
  -7  -7  11    6.91    1.37
   7  -7 -11    8.01    1.77
  -7   7  11    6.71    1.08
   7   7 -11    7.81    1.85
  -7   7  11    7.04    0.89
   5  -7 -11    2.90    1.14
  -5  -7  11    3.88    1.04
   5   7 -11    2.73    1.10
  -5   7  11    1.60    0.82
  -3  -7  11   14.32    2.01
  -3   7  11   15.25    2.53
   3   7 -11   13.02    2.28
  -1  -7  11   19.72    1.90
   1  -7 -11   16.42    1.68
   1   7 -11   21.58    2.95
  -1   7  11   21.26    3.09
   1  -7  11   23.01    2.06
  -1  -7 -11   28.70    2.25
   1   7  11   24.52    2.73
  -1   7 -11   24.36    2.62
   3  -7  11    2.37    0.90
  -3  -7 -11    2.33    0.76
  -3   7 -11    4.21    1.30
   3   7  11    3.70    1.35
   5  -7  11   24.35    1.98
  -5  -7 -11   27.73    2.32
   5   7  11   24.68    2.84
  -5   7 -11   29.46    2.80
  -7  -7 -11    7.82    1.69
   7  -7  11    7.71    1.20
   7   7  11   10.01    2.09
  -9  -7 -11   -0.30    0.40
   9  -7  11   -0.11    0.41
   9   7  11    0.83    0.82
   6  -8 -11    0.80    1.08
  -6  -8  11    0.45    0.70
  -6   8  11    0.12    0.54
   6   8 -11    0.53    0.85
  -4  -8  11    2.02    0.95
   4   8 -11    2.52    1.19
  -4   8  11    1.70    1.10
  -4   8  11    2.14    0.79
  -2  -8  11   22.15    2.14
   2  -8 -11   23.10    1.91
   2   8 -11   23.23    2.65
   0  -8  11    0.31    0.63
   0  -8 -11    0.89    0.58
   0   8  11   -0.49    0.96
   0   8 -11   -0.15    0.77
  -2  -8 -11    1.56    0.64
   2  -8  11    0.68    0.51
  -2   8 -11    1.34    1.03
   2   8  11    2.41    1.29
  -4  -8 -11    4.25    1.09
   4  -8  11    3.12    0.85
   4   8  11    1.74    1.14
  -4   8 -11    3.29    1.30
  -6  -8 -11   -0.41    0.41
   6  -8  11    0.30    0.45
  -6   8 -11    0.25    0.70
   6   8  11    1.19    0.94
  -5  -9  11    1.36    0.83
   5   9 -11    1.90    0.92
  -5   9  11   -0.40    0.89
  -5   9  11    2.11    0.81
  -3  -9  11    2.09    0.87
  -3   9  11    1.39    1.31
   3   9 -11    1.76    1.10
  -1  -9  11    0.17    0.49
   1  -9 -11    0.25    0.44
   1   9 -11    0.43    0.98
  -1   9  11    0.36    1.09
   1   9  11    1.24    1.04
  -3  -9 -11    8.99    1.50
   3  -9  11   12.30    1.70
  -3   9 -11    8.35    1.80
   3   9  11    9.72    2.19
  -5  -9 -11    1.18    0.74
   5   9  11    0.58    1.35
  -5   9 -11    0.52    0.88
  12   0 -12    4.89    1.51
  12   0 -12    5.47    0.83
 -12   0  12    5.29    0.69
  10   0 -12    0.28    0.40
 -10   0  12    0.20    0.37
  10   0 -12    1.06    0.89
  -8   0  12   10.10    1.09
   8   0 -12    8.56    1.85
   8   0 -12   11.63    1.13
   6   0 -12    9.24    1.60
   6   0 -12    8.96    1.26
  -6   0  12    6.60    1.12
  -6   0  12    8.98    1.56
  -4   0  12   99.49    4.90
   4   0 -12   92.67    4.68
  -4   0  12  106.27    4.96
   4   0 -12  107.14    4.85
  -2   0  12  249.14   10.11
  -2   0  12  241.39    9.42
   2   0 -12  253.11    9.28
   2   0 -12  253.40    9.95
   0   0  12    3.27    1.09
   0   0 -12    4.14    0.86
   0   0 -12    3.00    0.26
  -2   0 -12  179.17    7.63
   2   0  12  172.24    7.72
   4   0  12   33.38    1.70
   4   0  12   35.38    2.62
  -4   0 -12   34.49    1.86
  -4   0 -12   34.52    2.46
  -6   0 -12   10.85    1.12
   6   0  12   14.09    1.82
   6   0  12    9.40    1.61
   6   0  12   10.91    1.06
   8   0  12   38.95    2.60
  -8   0 -12   42.42    2.77
   8   0  12   44.62    2.99
  10   0  12    2.59    0.83
  10   0  12    2.39    0.89
  12   0  12    0.75    0.76
  12   0  12    2.92    0.92
  13  -1 -12    2.01    0.79
 -13  -1  12    1.64    0.55
  13   1 -12    1.01    1.08
  11  -1 -12    2.37    0.55
 -11  -1  12    1.86    0.60
  11  -1 -12    1.96    0.97
  11   1 -12    2.65    0.99
 -11   1  12    3.17    0.45
  11   1 -12    1.47    0.61
   9  -1 -12    1.03    0.69
   9  -1 -12    0.30    0.36
  -9  -1  12    0.86    0.52
   9   1 -12   -0.11    0.44
  -9   1  12    0.59    0.39
   9   1 -12    1.04    0.49
   7  -1 -12    0.94    0.44
   7  -1 -12    0.03    0.55
  -7  -1  12    0.75    0.52
   7   1 -12    0.49    0.77
  -7   1  12    0.73    0.40
   7   1 -12    0.35    0.37
   5  -1 -12   22.68    1.95
   5  -1 -12   22.03    1.65
  -5  -1  12   18.50    1.98
  -5  -1  12   22.93    1.86
   5   1 -12   22.42    1.77
  -5   1  12   23.10    1.86
   5   1 -12   24.87    2.13
   3  -1 -12   11.37    1.60
   3  -1 -12    9.36    1.06
  -3  -1  12   10.60    1.59
  -3  -1  12    8.50    1.35
  -3   1  12   10.90    1.08
   3   1 -12    8.68    1.47
   3   1 -12    9.58    1.35
  -3   1  12    7.36    1.31
  -1  -1  12  207.86    8.16
   1  -1 -12  218.57    7.74
  -1  -1  12  216.83    8.94
   1  -1 -12  209.96    8.58
  -1   1  12  211.01    7.73
  -1   1  12  224.29    8.90
   1   1 -12  211.35    8.19
   1   1 -12  171.96    9.82
   1  -1  12   38.08    2.75
  -1  -1 -12   43.36    2.72
  -1   1 -12   39.81    2.68
  -1   1 -12   41.87    1.89
   1   1  12   42.23    2.86
  -1   1 -12   41.10    1.84
   3  -1  12   67.45    2.90
   3  -1  12   70.15    3.94
  -3  -1 -12   67.62    2.66
   3   1  12   65.27    2.60
  -3   1 -12   71.43    2.91
   3   1  12   66.48    3.86
  -3   1 -12   63.36    3.70
   5  -1  12    0.19    0.33
   5  -1  12    0.13    0.54
  -5  -1 -12    0.33    0.33
   5   1  12    0.38    0.26
  -5   1 -12   -0.28    0.29
   5   1  12    0.06    0.26
  -5   1 -12   -0.26    0.27
   5   1  12   -0.27    0.39
   7  -1  12   39.25    2.43
   7  -1  12   39.13    2.77
  -7  -1 -12   36.06    2.42
   7   1  12   37.60    2.40
  -7   1 -12   34.76    2.38
   7   1  12   37.91    2.76
   9  -1  12    2.55    0.95
   9  -1  12    1.90    0.80
   9   1  12    1.40    0.77
   9   1  12    4.01    1.04
  11  -1  12    0.48    0.66
  11  -1  12    0.60    0.58
  11   1  12   -0.03    0.57
  11   1  12    0.23    0.44
  13  -1  12    2.63    0.98
  13  -1  12    1.49    0.59
  13   1  12    1.52    0.70
  13   1  12    1.12    0.86
 -12  -2  12    0.20    0.47
  12  -2 -12    1.17    0.72
  10  -2 -12   20.44    2.74
  10   2 -12   22.96    2.46
 -10   2  12   17.31    1.00
   8  -2 -12    1.95    0.87
  -8  -2  12    4.99    1.01
  -8   2  12    3.39    0.67
   8   2 -12    1.93    1.05
   6  -2 -12   15.32    2.10
   6  -2 -12   12.44    1.14
  -6  -2  12   12.36    1.68
   6   2 -12   13.01    1.33
  -6   2  12   13.02    1.96
   6   2 -12   13.60    2.06
  -6   2  12   12.38    1.30
  -4  -2  12    2.43    0.81
   4  -2 -12    3.10    0.86
  -4  -2  12    3.43    1.02
   4  -2 -12    2.04    0.62
  -4   2  12    2.10    0.72
   4   2 -12    1.97    0.66
  -4   2  12    3.52    0.88
   4   2 -12    1.66    0.74
   2  -2 -12   62.12    3.08
  -2  -2  12   63.54    3.56
   2  -2 -12   57.09    3.21
  -2  -2  12   60.14    3.52
   2   2 -12   56.50    3.21
  -2   2  12   63.60    3.52
   2   2 -12   55.01    3.28
  -2   2  12   56.15    2.88
   0  -2  12   19.90    1.87
   0   2  12   16.04    1.31
   0   2  12   17.34    1.31
   0   2 -12   17.75    1.69
   0   2 -12   19.23    1.46
   0   2  12   21.55    1.89
   2  -2  12  111.30    5.53
  -2   2 -12  114.58    4.78
   2   2  12  119.63    5.53
   2   2  12  113.70    4.56
   2   2  12  114.26    5.30
   2   2  12  105.88    4.36
  -2   2 -12  111.00    5.41
  -2   2 -12  115.66    4.79
   4  -2  12   55.25    2.79
   4  -2  12   48.76    3.19
  -4  -2 -12   49.46    2.57
  -4   2 -12   51.23    2.73
   4   2  12   52.58    3.24
  -4   2 -12   49.88    3.12
   4   2  12   50.32    2.57
   6  -2  12   51.65    2.88
  -6  -2 -12   50.72    2.85
   6  -2  12   48.03    3.14
  -6   2 -12   50.89    3.11
   6   2  12   45.44    2.72
  -6   2 -12   48.89    2.85
   6   2  12   44.44    3.11
   8  -2  12    1.51    0.74
  -8  -2 -12    0.31    0.48
   8  -2  12    1.15    0.73
  -8   2 -12    0.97    0.61
   8   2  12    1.31    0.68
   8   2  12    0.51    0.51
  10  -2  12    8.89    1.41
  10  -2  12    8.01    1.55
  10   2  12    8.64    1.61
  10   2  12    9.53    1.53
  12  -2  12    7.24    1.48
  12  -2  12    8.20    1.76
  12   2  12    9.84    1.72
  12   2  12    8.15    1.38
 -11  -3  12    5.51    1.08
  11  -3 -12    5.10    1.36
  11   3 -12    6.15    1.68
   9  -3 -12    0.67    0.75
  -9  -3  12    0.26    0.58
  -9   3  12    0.06    0.24
  -9   3  12    0.06    0.20
   9   3 -12    1.13    0.96
  -7  -3  12    0.17    0.46
   7  -3 -12    0.89    0.70
  -7   3  12    0.81    0.33
  -7   3  12    0.54    0.38
   7   3 -12    2.14    1.05
  -5  -3  12   38.52    2.63
   5  -3 -12   37.33    2.71
   5   3 -12   33.82    2.80
  -5   3  12   35.90    2.07
  -5   3  12   34.94    2.35
  -5   3  12   30.85    2.38
  -3  -3  12   56.27    3.49
   3  -3 -12   61.49    3.49
  -3   3  12   62.60    3.49
  -3   3  12   58.08    3.27
  -3   3  12   70.15    4.40
   3   3 -12   64.41    3.80
   1  -3 -12    0.27    0.34
  -1  -3  12   -0.26    0.46
  -1  -3  12    0.74    0.59
  -1   3  12   -0.48    0.34
  -1   3  12    0.61    0.39
   1   3 -12    0.25    0.37
  -1   3  12    0.03    0.28
   1   3 -12   -0.07    0.22
   1  -3  12    7.14    1.22
  -1   3 -12    8.94    1.48
  -1   3 -12    7.67    1.28
  -1   3 -12    8.43    1.23
   1   3  12    8.52    1.32
   1   3  12    7.45    1.37
   1   3  12    9.66    1.37
   1   3  12    7.38    0.85
   3  -3  12  184.99    7.82
   3   3  12  181.60    7.41
  -3   3 -12  180.22    7.41
  -3   3 -12  184.18    7.77
   3   3  12  178.46    7.72
  -3   3 -12  180.98    7.44
   3   3  12  162.45    6.99
   5  -3  12   27.82    2.25
   5  -3  12   29.99    2.23
  -5  -3 -12   30.37    2.10
  -5   3 -12   33.04    2.28
   5   3  12   29.95    2.22
   5   3  12   32.56    2.48
  -5   3 -12   30.09    2.29
   7  -3  12   -0.47    0.43
   7  -3  12   -0.10    0.41
  -7  -3 -12    0.36    0.50
   7   3  12    0.37    0.67
  -7   3 -12    0.20    0.54
   7   3  12    0.56    0.56
   9  -3  12   12.34    1.63
   9  -3  12   14.06    1.96
   9   3  12   10.78    1.74
   9   3  12   13.52    2.12
  11  -3  12    0.63    0.46
  11  -3  12    0.35    0.61
  11   3  12   -0.65    0.45
  11   3  12   -0.15    0.43
  12  -4 -12   -0.92    0.54
 -12  -4  12    0.34    0.37
  12   4 -12    0.98    0.86
 -10  -4  12    0.31    0.48
  10  -4 -12    0.42    0.80
  10   4 -12    0.34    0.78
  -8  -4  12    0.24    0.39
   8  -4 -12    1.13    0.87
  -8   4  12    0.14    0.29
  -8   4  12    0.17    0.25
   8   4 -12   -0.17    0.68
   6  -4 -12    4.08    1.14
  -6  -4  12    1.71    0.79
  -6   4  12    2.05    0.72
   6   4 -12    1.82    0.98
  -6   4  12    2.35    0.52
  -4  -4  12    6.95    1.31
   4  -4 -12    8.83    1.66
  -4   4  12   10.32    1.07
   4   4 -12   11.56    2.06
  -4   4  12    9.41    1.45
  -4   4  12   11.61    1.63
  -2  -4  12    7.61    1.44
   2  -4 -12    9.57    1.54
  -2  -4  12    5.97    1.40
   2   4 -12   11.33    1.91
  -2   4  12   10.33    1.43
  -2   4  12    8.57    1.42
  -2   4  12    9.06    1.41
   0  -4  12    0.05    0.50
   0   4  12    0.48    0.45
   0   4  12    0.91    0.68
   0   4 -12   -0.05    0.44
   0   4  12    0.57    0.51
   2  -4  12   -0.17    0.32
   2   4  12    0.50    0.53
   2   4  12    0.44    0.34
  -2   4 -12    0.47    0.55
  -2   4 -12    0.30    0.56
   2   4  12   -0.21    0.35
   4  -4  12   17.46    1.72
  -4  -4 -12   14.53    1.45
   4   4  12   19.94    1.96
  -4   4 -12   15.95    1.62
   4   4  12   13.02    1.90
   6  -4  12    0.55    0.61
   6  -4  12    0.78    0.57
  -6  -4 -12    0.67    0.59
   6   4  12    0.88    0.67
   6   4  12    0.83    0.65
   8  -4  12    2.13    0.69
   8  -4  12    2.49    0.99
   8   4  12    2.35    0.88
   8   4  12    2.69    1.64
  10  -4  12    2.26    0.72
  10  -4  12    2.60    0.84
  10   4  12    1.59    0.79
  10   4  12    2.15    0.85
  12  -4  12    1.66    0.87
  12  -4  12    2.32    0.63
  12   4  12    4.53    1.14
  12   4  12    4.08    1.17
 -11  -5  12    1.28    0.65
  11  -5 -12    1.79    0.99
  11   5 -12    2.25    1.25
  -9  -5  12    3.05    0.86
   9  -5 -12    0.83    0.88
   9   5 -12    2.62    1.10
  -7  -5  12    4.45    0.99
   7  -5 -12    4.34    1.34
  -7   5  12    5.88    0.83
  -7   5  12    8.68    1.30
   7   5 -12    6.86    1.78
  -5  -5  12    9.33    1.55
   5  -5 -12    7.65    1.72
  -5   5  12   11.11    1.57
  -5   5  12    8.04    1.06
   5   5 -12   10.79    2.05
   3  -5 -12    4.70    1.30
  -3  -5  12    5.79    1.34
   3   5 -12    3.72    1.28
  -3   5  12    4.83    1.15
  -1  -5  12   21.03    1.98
  -1   5  12   16.56    1.68
  -1   5  12   22.82    2.34
  -1   5  12   20.22    2.25
   1   5 -12   19.18    2.18
   1  -5  12   31.55    2.42
  -1   5 -12   26.66    2.48
   1   5  12   33.41    2.70
   1   5  12   29.62    2.38
   1   5  12   28.39    2.14
   3  -5  12    5.74    1.21
   3   5  12    8.67    1.70
  -3   5 -12    8.35    1.61
   3   5  12    3.84    0.96
  -5  -5 -12   14.97    2.15
   5  -5  12   17.93    1.73
   5   5  12   17.24    2.44
   7  -5  12    8.10    1.56
   7  -5  12    9.17    1.38
   7   5  12    7.84    1.65
   9  -5  12   -0.10    0.41
   9  -5  12    0.06    0.59
   9   5  12   -0.24    0.54
   9   5  12   -0.04    0.53
  11  -5  12    0.43    0.72
  11  -5  12   -0.49    0.30
  11   5  12    0.42    0.60
  11   5  12   -0.10    0.75
  10  -6 -12    7.07    1.69
 -10  -6  12    7.53    1.64
  10   6 -12    7.89    1.97
   8  -6 -12   22.32    2.45
  -8  -6  12   23.55    2.14
  -8   6  12   19.15    1.28
  -8   6  12   23.06    1.56
   8   6 -12   20.38    2.95
  -6  -6  12   13.92    1.89
   6  -6 -12   13.90    2.30
   6   6 -12   10.89    2.11
  -6   6  12   13.18    1.12
  -6   6  12   15.26    1.47
  -4  -6  12    0.11    0.51
   4  -6 -12    0.34    0.75
  -4   6  12    0.13    0.54
   4   6 -12    0.49    0.79
  -2  -6  12    1.50    0.77
  -2   6  12    1.18    0.76
   2   6 -12    0.90    0.78
  -2   6  12    2.07    1.15
   0  -6  12    9.12    1.59
   0   6  12    8.53    1.82
   0   6 -12    9.63    1.88
  -2  -6 -12    1.11    0.56
   2  -6  12    3.81    1.08
   2   6  12   -0.02    0.73
  -2   6 -12    2.66    1.13
   4  -6  12    1.03    0.66
  -4  -6 -12    0.29    0.43
   4   6  12    0.52    0.81
  -4   6 -12    1.29    0.84
   6  -6  12    7.92    1.26
  -6  -6 -12    6.50    1.18
   6   6  12    5.89    1.50
   8  -6  12   15.32    1.48
   8  -6  12   13.85    2.19
   8   6  12   16.07    2.35
  10  -6  12    1.55    0.48
  10  -6  12    2.31    1.03
  10   6  12    3.49    1.20
  10   6  12    3.11    0.93
   9  -7 -12   -1.06    0.48
  -9  -7  12    0.72    0.48
   9   7 -12    2.51    1.03
   7  -7 -12    4.33    1.39
  -7  -7  12    4.97    1.34
  -7   7  12    5.75    1.10
   7   7 -12    6.11    1.74
  -5  -7  12   10.86    1.83
   5  -7 -12   10.66    1.97
   5   7 -12   11.89    2.19
  -5   7  12    9.99    1.49
  -3  -7  12    2.82    0.90
  -3   7  12    1.05    0.90
  -3   7  12    1.04    0.66
   3   7 -12    2.27    1.24
  -1  -7  12   15.44    2.14
  -1   7  12   16.17    2.61
   1   7 -12   15.04    2.51
  -1  -7 -12    1.35    0.78
   1  -7  12    2.63    0.94
   1   7  12   -0.44    0.81
  -1   7 -12    1.15    0.98
   3  -7  12    7.18    1.33
  -3  -7 -12    7.84    1.51
   3   7  12    6.40    1.86
  -3   7 -12    8.41    1.87
  -5  -7 -12    1.59    0.77
   5  -7  12    2.42    0.83
  -5   7 -12    1.81    0.85
   5   7  12    1.17    1.01
  -7  -7 -12    2.65    0.99
   7  -7  12    2.32    0.77
  -7   7 -12    2.37    1.05
   7   7  12    2.29    1.02
   9  -7  12    1.87    0.60
   9   7  12    2.23    0.98
  -6  -8  12    1.12    0.81
  -6   8  12    2.18    0.78
   6   8 -12    1.71    1.16
  -4  -8  12   12.14    1.99
  -4   8  12   16.48    1.72
   4   8 -12   13.67    2.44
  -4   8  12   11.27    2.23
  -2  -8  12   21.09    2.16
   2   8 -12   25.26    3.29
  -2   8  12   25.84    2.88
   0  -8 -12    0.95    0.55
   0  -8  12   -0.66    0.36
   0   8  12   -0.64    0.70
   0   8 -12    1.80    0.94
   2  -8  12   11.97    1.91
  -2  -8 -12   13.64    2.02
  -2   8 -12   10.21    1.98
   2   8  12   10.23    2.15
   4  -8  12    0.11    0.43
  -4  -8 -12    1.16    0.88
   4   8  12    1.27    0.79
  -4   8 -12    0.07    0.63
  -6  -8 -12   -0.23    0.40
   6  -8  12    0.41    0.49
  -6   8 -12    1.74    0.95
   6   8  12    0.13    1.00
  -3  -9  12    0.69    0.63
   3   9 -12    0.77    0.95
  -3   9  12    1.43    0.76
  -1  -9  12   18.01    1.91
   1  -9 -12   19.55    1.81
   1   9 -12   16.01    2.69
  -1   9  12   20.65    3.09
   1  -9  12    7.62    1.43
  -1  -9 -12    6.03    1.26
  -1   9 -12    4.74    1.42
   1   9  12    4.76    1.53
   3  -9  12    0.72    0.66
  -3  -9 -12    1.07    0.64
   3   9  12    0.69    0.84
  -3   9 -12   -0.37    0.79
  12   0 -13   -0.92    0.49
 -12   0  13   -0.04    0.25
  12   0 -13   -0.45    0.48
  10   0 -13   -0.17    0.73
  10   0 -13   -0.25    0.58
 -10   0  13   -0.05    0.30
   8   0 -13   -0.03    0.56
   8   0 -13    0.26    0.30
  -8   0  13    0.06    0.42
   6   0 -13    0.79    0.67
  -6   0  13    0.13    0.43
   6   0 -13   -0.35    0.36
  -6   0  13    0.58    0.53
  -4   0  13   -0.16    0.38
  -4   0  13    0.12    0.36
   4   0 -13    0.44    0.34
   4   0 -13   -0.06    0.34
  -2   0  13   -0.02    0.32
  -2   0  13   -0.02    0.50
   2   0 -13    0.31    0.33
   2   0 -13    0.25    0.30
   0   0  13   -0.20    0.35
   0   0 -13   -0.26    0.30
   2   0  13    0.04    0.47
  -2   0 -13    0.37    0.42
   4   0  13    0.96    0.68
   4   0  13    0.27    0.22
  -4   0 -13   -0.01    0.30
  -4   0 -13    0.08    0.25
   6   0  13    0.19    0.60
  -6   0 -13   -0.08    0.22
   6   0  13   -0.24    0.26
   8   0  13   -0.06    0.42
  -8   0 -13    0.37    0.42
   8   0  13   -0.26    0.54
  10   0  13    0.62    0.65
  10   0  13    0.18    0.45
  12   0  13    0.16    0.60
  12   0  13   -0.65    0.42
  13  -1 -13    0.21    0.67
 -13  -1  13    1.18    0.48
  13   1 -13    3.00    1.13
  11  -1 -13   -0.03    0.63
  11  -1 -13    0.28    0.34
 -11  -1  13   -0.32    0.29
  11   1 -13    0.41    0.60
 -11   1  13   -0.10    0.23
   9  -1 -13    1.66    0.60
  -9  -1  13    3.08    0.75
   9  -1 -13    3.66    1.27
  -9   1  13    2.66    0.62
   9   1 -13    0.91    0.78
   9   1 -13    2.28    0.74
   7  -1 -13   12.70    1.26
  -7  -1  13   12.80    1.70
   7   1 -13   12.33    2.35
   7   1 -13   12.56    1.32
  -7   1  13   11.55    1.49
  -5  -1  13   55.44    3.19
  -5  -1  13   55.60    3.46
   5  -1 -13   55.03    3.22
   5  -1 -13   48.02    2.88
   5   1 -13   47.53    2.99
  -5   1  13   51.90    3.11
  -5   1  13   51.21    3.61
   5   1 -13   58.26    3.39
   3  -1 -13   34.44    2.08
  -3  -1  13   32.51    2.32
  -3  -1  13   32.27    2.47
   3  -1 -13   32.37    2.61
   3   1 -13   32.81    2.28
  -3   1  13   33.56    2.49
  -3   1  13   31.22    2.02
   3   1 -13   32.50    2.14
   1  -1 -13   70.28    2.94
  -1  -1  13   71.77    3.36
  -1  -1  13   69.53    4.03
   1  -1 -13   70.45    3.76
  -1   1  13   73.16    4.04
   1   1 -13   69.84    3.14
  -1   1  13   60.40    2.89
   1   1 -13   71.29    3.84
   1  -1  13    8.69    1.46
  -1  -1 -13   11.94    1.57
  -1   1 -13   13.66    1.49
   1   1  13   12.15    1.82
  -1   1 -13   13.75    0.83
  -1   1 -13   14.62    0.85
   3  -1  13    0.83    0.64
  -3   1 -13    0.67    0.29
  -3   1 -13    0.33    0.32
   3   1  13    0.61    0.54
  -3   1 -13    0.48    0.24
   5  -1  13    5.36    0.83
  -5  -1 -13    5.31    0.84
   5  -1  13    4.68    1.28
  -5   1 -13    4.74    0.78
   5   1  13    4.13    1.09
   5   1  13    4.87    0.72
  -5   1 -13    3.88    1.02
   7  -1  13   11.16    1.88
   7  -1  13   10.20    1.40
  -7  -1 -13    9.13    1.28
  -7   1 -13   11.25    1.21
   7   1  13    7.01    1.35
   7   1  13    9.01    1.03
   9  -1  13    2.04    0.88
   9  -1  13    1.58    0.61
  -9  -1 -13    3.39    0.92
   9   1  13    1.89    0.77
   9   1  13    2.38    0.96
  11  -1  13    5.06    1.23
  11  -1  13    3.99    1.00
  11   1  13    5.10    1.26
  11   1  13    5.03    1.14
  13  -1  13   -0.59    0.44
  13  -1  13    0.65    0.59
  13   1  13    0.45    0.54
  13   1  13   -0.20    0.48
  12  -2 -13   -0.29    0.82
 -12  -2  13    0.06    0.32
  12   2 -13   -0.35    0.48
 -10  -2  13    0.15    0.43
  10  -2 -13    0.56    0.72
 -10   2  13    0.28    0.24
  10   2 -13    0.62    0.55
 -10   2  13   -0.06    0.21
   8  -2 -13   21.94    2.26
  -8  -2  13   22.26    1.91
   8   2 -13   23.10    2.39
  -8   2  13   22.39    1.52
  -6  -2  13   26.93    2.10
   6  -2 -13   25.90    2.25
   6  -2 -13   25.86    1.78
  -6   2  13   26.17    2.00
   6   2 -13   26.36    2.37
  -4  -2  13    1.60    0.69
   4  -2 -13    0.45    0.42
   4  -2 -13    0.48    0.54
  -4   2  13   -0.10    0.46
   4   2 -13    0.82    0.54
  -4   2  13    0.98    0.40
   2  -2 -13    6.84    1.27
  -2  -2  13    8.16    1.59
  -2  -2  13    6.69    1.30
   2  -2 -13    7.37    1.09
   2   2 -13    5.07    1.00
  -2   2  13    4.61    1.09
  -2   2  13    6.27    0.96
   2   2 -13    7.82    1.34
   0  -2  13    5.60    1.14
   0   2 -13    8.31    1.14
   0   2  13    5.03    1.15
   0   2 -13    7.47    1.05
   0   2  13    7.28    0.80
   0   2 -13    8.00    1.42
   2  -2  13   11.31    1.67
   2   2  13   16.02    1.73
  -2   2 -13   15.29    1.59
  -2   2 -13   18.75    1.37
  -2   2 -13   18.41    1.29
   2   2  13   17.09    1.08
   2   2  13   15.45    0.95
   2   2  13   18.77    1.88
   4  -2  13    8.27    1.18
  -4  -2 -13    7.90    0.81
   4  -2  13    6.48    1.24
   4   2  13    6.73    1.43
   4   2  13    6.65    0.77
  -4   2 -13    7.54    1.43
  -4   2 -13    7.47    1.03
   6  -2  13    6.04    1.09
  -6  -2 -13    5.68    0.96
   6  -2  13    6.93    1.52
   6   2  13    4.08    1.10
  -6   2 -13    6.12    1.05
   6   2  13    6.66    1.05
   8  -2  13   50.12    3.32
  -8  -2 -13   56.52    3.27
   8  -2  13   59.87    3.32
  -8   2 -13   53.84    3.23
   8   2  13   54.43    3.50
   8   2  13   56.70    3.25
  10  -2  13    5.38    1.18
  10  -2  13    6.60    1.32
  10   2  13    8.36    1.44
  10   2  13    6.07    1.38
  12  -2  13    1.10    0.60
  12  -2  13    1.05    0.82
  12   2  13    1.91    0.81
  12   2  13   -0.14    0.61
  11  -3 -13    1.32    0.89
 -11  -3  13    0.46    0.54
  11   3 -13    0.38    0.69
   9  -3 -13   34.37    2.88
  -9  -3  13   30.25    2.27
  -9   3  13   30.04    1.58
  -9   3  13   33.22    1.70
   9   3 -13   30.16    2.82
   7  -3 -13    5.33    1.22
  -7  -3  13    2.79    0.95
  -7   3  13    2.55    0.68
  -7   3  13    2.67    0.55
   7   3 -13    2.25    0.91
   5  -3 -13    7.72    1.41
  -5  -3  13    9.74    1.60
   5   3 -13   12.76    2.03
  -5   3  13   10.69    1.08
  -5   3  13    9.94    1.52
  -5   3  13   11.24    1.60
   3  -3 -13    3.24    0.93
  -3  -3  13    2.75    0.91
  -3  -3  13    3.26    0.95
  -3   3  13    3.08    0.63
  -3   3  13    3.00    0.73
  -3   3  13    2.75    0.93
   3   3 -13    5.07    1.15
   1  -3 -13    0.21    0.41
  -1  -3  13    0.73    0.53
  -1  -3  13    0.66    0.64
   1   3 -13    0.16    0.33
  -1   3  13    0.90    0.52
  -1   3  13    1.38    0.49
  -1   3  13    0.95    0.50
   1  -3  13   23.85    2.18
   1   3  13   25.39    1.59
   1   3  13   27.25    2.26
  -1   3 -13   28.57    2.00
  -1   3 -13   28.67    1.99
   1   3  13   23.51    1.78
   3  -3  13   52.95    3.30
   3   3  13   46.15    3.39
  -3   3 -13   53.34    2.87
   3   3  13   44.13    2.45
  -3   3 -13   54.25    2.94
   3   3  13   43.87    2.64
   5  -3  13    1.08    0.63
  -5  -3 -13   -0.25    0.29
   5  -3  13    1.02    0.66
   5   3  13    1.01    0.55
   5   3  13    0.15    0.49
  -5   3 -13    0.70    0.53
   7  -3  13   19.75    1.88
  -7  -3 -13   20.90    1.81
   7  -3  13   21.53    1.95
  -7   3 -13   19.42    1.85
   7   3  13   22.12    1.91
   7   3  13   23.56    2.11
   9  -3  13    6.65    1.35
   9  -3  13    4.98    1.31
   9   3  13    5.31    1.22
  11  -3  13    4.19    1.04
  11  -3  13    5.40    1.00
  11   3  13    4.58    1.16
  11   3  13    4.07    1.11
  12  -4 -13   20.91    2.90
 -12  -4  13   22.87    1.85
  12   4 -13   17.98    2.74
 -10  -4  13   37.16    2.56
  10  -4 -13   36.49    3.19
  10   4 -13   38.87    3.35
  -8  -4  13    0.28    0.48
   8  -4 -13    1.48    0.74
  -8   4  13    1.07    0.42
   8   4 -13    0.33    0.71
  -8   4  13    2.18    0.42
  -6  -4  13    1.98    0.89
   6  -4 -13    0.89    0.70
   6   4 -13    1.59    0.87
  -6   4  13    1.05    0.55
  -6   4  13    2.37    0.83
   4  -4 -13    8.48    1.53
  -4  -4  13    8.98    1.53
  -4   4  13    9.64    1.47
   4   4 -13   10.64    1.97
  -4   4  13    9.03    1.46
  -4   4  13    8.56    1.22
  -2  -4  13    6.09    1.37
   2  -4 -13   10.70    1.70
  -2  -4  13    7.11    1.39
  -2   4  13    9.51    1.64
   2   4 -13    9.18    1.70
  -2   4  13    7.49    1.22
   0  -4  13    0.91    0.54
   0   4 -13    2.39    0.85
   0   4  13    1.27    0.65
   0   4 -13    0.82    0.77
   0   4  13    1.31    0.78
   0   4  13    1.31    0.52
   2  -4  13    1.57    0.77
  -2   4 -13    1.57    0.74
   2   4  13    2.22    0.86
   2   4  13    2.17    0.64
   2   4  13    2.04    0.85
   4  -4  13  107.04    5.19
   4   4  13  104.28    5.09
   4   4  13   95.15    5.08
  -4   4 -13   98.35    4.96
  -4   4 -13   98.64    5.04
   6  -4  13   39.29    2.79
  -6  -4 -13   33.81    2.45
   6  -4  13   35.66    2.57
   6   4  13   38.57    2.79
   6   4  13   39.43    2.76
   8  -4  13    2.85    1.12
   8  -4  13    6.14    1.21
   8   4  13    3.22    1.11
   8   4  13    4.94    1.46
  10  -4  13    0.41    0.77
  10  -4  13    4.37    0.93
  10   4  13    4.14    1.14
  10   4  13    2.80    1.03
  12  -4  13   11.48    1.87
  12  -4  13   14.50    2.08
  12   4  13   16.86    2.33
 -11  -5  13    0.77    0.57
  11  -5 -13    0.02    0.71
  11   5 -13    0.98    0.92
   9  -5 -13   34.72    2.92
  -9  -5  13   30.99    2.38
  -9   5  13   27.54    1.44
   9   5 -13   32.34    3.08
  -7  -5  13    3.17    0.86
   7  -5 -13    5.01    1.31
   7   5 -13    3.00    1.11
  -7   5  13    3.93    0.91
   5  -5 -13    2.59    0.83
  -5  -5  13    2.75    0.97
   5   5 -13    2.42    1.09
  -5   5  13    2.69    0.61
  -5   5  13    2.77    0.99
   3  -5 -13   16.24    1.81
  -3  -5  13   11.97    1.88
   3   5 -13    8.98    1.79
  -3   5  13    9.66    1.55
  -1  -5  13    1.57    0.86
   1   5 -13    1.43    0.76
  -1   5  13    3.43    1.16
  -1   5  13    0.86    0.65
  -1   5  13    2.16    0.86
   1  -5  13   16.50    2.28
   1   5  13   15.95    2.23
   1   5  13   12.94    1.34
  -1   5 -13   16.43    1.84
   1   5  13   15.54    2.07
   3  -5  13   84.71    4.61
   3   5  13   91.21    4.83
   3   5  13   94.98    5.03
   3   5  13   84.00    4.31
  -3   5 -13   88.26    4.83
   5  -5  13    1.84    0.67
  -5   5 -13    1.52    0.82
   5   5  13    1.85    1.06
   5   5  13    3.07    0.89
   7  -5  13   27.55    2.52
   7  -5  13   27.97    2.17
   7   5  13   32.01    2.65
   7   5  13   29.38    2.50
   9  -5  13    6.15    1.42
   9  -5  13    8.50    1.33
   9   5  13    6.78    1.37
   9   5  13    7.05    1.43
  11  -5  13    3.79    0.83
  11  -5  13    3.05    1.06
  11   5  13    4.59    1.11
  11   5  13    2.44    0.88
 -10  -6  13    1.68    0.79
  10  -6 -13    1.77    0.89
  10   6 -13    1.77    1.02
   8  -6 -13   18.72    2.62
  -8  -6  13   13.28    1.83
   8   6 -13   17.48    2.62
  -8   6  13   18.40    1.47
  -8   6  13   15.97    1.22
  -6  -6  13   10.53    1.74
   6  -6 -13   14.75    2.24
   6   6 -13    9.28    1.99
  -6   6  13   13.38    1.38
   4  -6 -13    0.88    0.82
  -4  -6  13    0.99    0.65
   4   6 -13    0.61    0.79
  -4   6  13    1.00    0.65
  -2  -6  13    0.44    0.65
   2   6 -13   -0.25    0.55
  -2   6  13   -0.37    0.73
  -2   6  13    0.74    0.63
   0  -6  13    0.87    0.75
   0   6  13    3.25    1.03
   0   6  13    2.33    1.06
   0   6 -13    2.45    1.09
   2  -6  13    4.15    1.17
  -2   6 -13    4.57    1.29
   2   6  13    6.08    1.56
   4  -6  13    8.81    1.45
  -4   6 -13   10.30    1.93
   4   6  13    7.28    1.80
   6  -6  13    1.07    0.63
   6   6  13    1.94    0.86
  -6   6 -13    1.15    0.90
   8  -6  13   27.96    2.05
   8  -6  13   29.01    2.60
   8   6  13   25.40    2.41
   8   6  13   28.93    2.68
  10  -6  13    0.30    0.44
  10  -6  13    1.42    0.81
  10   6  13    0.54    0.84
  10   6  13   -0.65    0.40
   7  -7 -13    1.89    1.09
  -7  -7  13    4.22    1.16
  -7   7  13    3.86    0.88
   5  -7 -13   16.38    2.47
  -5  -7  13   20.69    2.58
  -5   7  13   21.39    1.92
   5   7 -13   20.75    2.96
  -3  -7  13    2.92    0.87
  -3   7  13    3.08    1.16
  -3   7  13    3.54    1.13
   3   7 -13    3.40    1.20
  -1  -7  13   16.10    2.28
   1   7 -13   13.93    2.35
  -1   7  13   17.18    2.62
  -1   7  13   14.89    2.05
   1  -7  13   13.84    1.93
   1   7  13   11.31    2.12
  -1   7 -13   14.72    2.18
  -3  -7 -13    1.44    0.69
   3  -7  13    0.35    0.55
  -3   7 -13    1.89    1.05
   3   7  13    1.00    0.88
   5  -7  13    5.36    1.15
  -5  -7 -13    2.97    0.91
   5   7  13    7.06    1.68
  -5   7 -13    5.37    1.30
   7  -7  13    7.56    1.29
  -7   7 -13   10.15    1.99
   7   7  13    7.41    1.64
  -6  -8  13    3.31    0.98
   6  -8 -13    7.15    2.04
  -6   8  13    3.91    0.95
   6   8 -13    4.11    1.34
  -4  -8  13    0.54    0.62
   4   8 -13    0.85    1.02
  -4   8  13    0.93    0.98
  -4   8  13    0.78    0.65
  -2  -8  13    1.08    0.60
  -2   8  13    0.53    0.84
   2   8 -13    1.22    0.87
  -2   8  13   -0.18    0.44
   0  -8  13    1.69    0.82
   0   8 -13    1.69    1.10
   0   8  13    2.16    1.19
  -2  -8 -13    8.10    1.39
   2  -8  13   10.35    1.68
   2   8  13    8.53    1.78
  -2   8 -13    9.80    2.00
   4  -8  13   -0.04    0.43
  -4  -8 -13    0.14    0.38
   4   8  13    0.54    0.87
  -4   8 -13   -0.10    0.71
  -6  -8 -13   -0.45    0.33
   6  -8  13   -0.02    0.47
  -6   8 -13    0.62    0.89
   6   8  13    0.15    0.80
  -3  -9  13   14.88    2.10
  -3   9  13   18.92    1.91
   3   9 -13   19.00    2.85
  -1  -9  13    0.93    0.64
   1   9 -13    4.69    1.43
  -1   9  13    0.85    1.07
  -1  -9 -13   -0.36    0.45
   1  -9  13    0.02    0.55
   1   9  13    1.08    0.93
  -1   9 -13    0.84    0.83
   3  -9  13    6.05    1.21
  -3  -9 -13    7.28    1.51
  -3   9 -13    6.51    1.70
   3   9  13    8.74    2.00
 -12   0  14    0.24    0.28
  10   0 -14    4.37    0.89
  10   0 -14    6.50    1.43
 -10   0  14    6.83    1.03
  -8   0  14   70.66    3.53
   8   0 -14   63.14    3.44
   8   0 -14   72.10    4.28
  -6   0  14   -0.09    0.45
   6   0 -14    0.34    0.53
   6   0 -14    0.17    0.46
  -6   0  14    1.16    0.41
   4   0 -14  202.15    8.61
  -4   0  14  215.67    8.91
  -4   0  14  209.99    8.65
   4   0 -14  213.73    8.50
  -2   0  14   13.84    1.20
   2   0 -14    9.13    1.37
  -2   0  14   11.10    1.70
   2   0 -14   13.91    1.11
   0   0 -14   17.58    1.71
   0   0  14   16.48    2.24
  -2   0 -14   45.78    3.03
   2   0  14   50.21    3.30
   4   0  14   28.15    1.35
   4   0  14   28.85    2.44
  -4   0 -14   27.32    1.38
   6   0  14   23.40    2.54
  -6   0 -14   23.41    1.61
   6   0  14   25.88    1.63
   8   0  14   62.50    3.25
   8   0  14   59.74    3.78
  10   0  14    0.11    1.08
  10   0  14    0.10    0.39
  12   0  14   12.43    1.80
  12   0  14   17.25    1.83
  11  -1 -14    0.20    0.47
  11  -1 -14    1.96    1.02
 -11  -1  14    2.04    0.62
 -11   1  14    1.30    0.36
  11   1 -14    2.28    1.10
   9  -1 -14    6.29    0.99
  -9  -1  14    6.17    1.14
   9  -1 -14    4.83    1.33
  -9   1  14    3.56    0.71
   9   1 -14    3.43    1.21
   7  -1 -14   40.25    3.12
  -7  -1  14   49.08    2.97
   7  -1 -14   50.81    3.87
  -7   1  14   53.19    2.95
   7   1 -14   50.82    3.42
   5  -1 -14   54.99    3.19
   5  -1 -14   62.26    3.45
  -5  -1  14   57.93    3.43
  -5  -1  14   57.84    3.56
  -5   1  14   56.62    3.35
  -5   1  14   63.94    3.54
   5   1 -14   51.80    3.18
   5   1 -14   56.80    3.42
  -3  -1  14   61.38    3.63
  -3  -1  14   60.49    3.35
   3  -1 -14   51.43    3.20
   3  -1 -14   59.18    3.01
  -3   1  14   55.49    3.47
  -3   1  14   57.35    3.03
   3   1 -14   56.64    3.03
   3   1 -14   54.84    3.34
  -1  -1  14   23.81    2.26
   1  -1 -14   28.64    1.48
   1  -1 -14   22.01    1.95
  -1  -1  14   29.02    1.83
  -1   1  14   26.15    2.29
   1   1 -14   27.88    2.16
  -1   1  14   27.26    1.49
   1   1 -14   28.80    1.63
  -1  -1 -14   53.48    3.27
   1  -1  14   51.33    3.46
  -1   1 -14   56.22    2.20
   1   1  14   57.30    3.58
  -1   1 -14   56.62    3.40
  -1   1 -14   54.31    2.20
   3  -1  14   -0.15    0.42
  -3   1 -14   -0.08    0.20
   3   1  14    0.64    0.72
  -3   1 -14   -0.23    0.15
   5  -1  14    5.74    1.29
  -5  -1 -14    6.78    0.88
   5  -1  14    5.81    0.87
  -5   1 -14    5.79    0.86
   5   1  14    5.95    0.68
   5   1  14    7.75    1.56
   7  -1  14    5.20    1.28
  -7  -1 -14    3.88    0.79
   7  -1  14    4.60    0.93
   7   1  14    4.92    0.86
  -7   1 -14    2.98    0.77
   7   1  14    4.53    1.18
  -9  -1 -14   26.03    2.05
   9  -1  14   29.16    2.10
   9  -1  14   24.54    2.25
   9   1  14   24.83    1.94
   9   1  14   23.53    2.26
  11  -1  14   12.44    1.82
  11  -1  14   12.08    1.74
  11   1  14   14.61    2.00
  11   1  14   14.19    1.88
 -12  -2  14    8.58    1.20
  12  -2 -14    8.76    1.73
  12   2 -14    7.84    1.86
 -10  -2  14    1.20    0.61
  10  -2 -14    1.49    0.78
  10   2 -14    1.38    0.89
 -10   2  14    1.08    0.36
 -10   2  14    1.98    0.52
  -8  -2  14   23.47    1.94
   8  -2 -14   23.06    2.22
   8   2 -14   20.76    2.27
  -8   2  14   22.07    1.64
   6  -2 -14    0.64    0.58
   6  -2 -14    1.28    0.81
  -6  -2  14    1.45    0.76
   6   2 -14   -0.11    0.56
  -6   2  14    0.81    0.63
  -4  -2  14   88.93    4.51
   4  -2 -14   82.03    4.11
  -4  -2  14   81.47    5.17
   4  -2 -14   76.48    4.00
   4   2 -14   78.48    4.25
  -4   2  14   82.22    4.36
  -4   2  14   79.78    4.04
   2  -2 -14    7.22    1.07
  -2  -2  14    6.51    1.20
  -2  -2  14    6.36    1.43
   2  -2 -14    6.44    1.22
   2   2 -14    7.58    1.18
  -2   2  14    9.08    1.65
  -2   2  14    6.04    0.87
   0  -2  14   52.46    3.45
   0   2  14   52.40    2.53
   0   2 -14   54.75    2.74
   0   2  14   50.32    2.32
   0   2 -14   56.56    2.78
   0   2  14   54.09    3.40
   2  -2  14    1.06    0.80
   2   2  14    0.61    0.21
   2   2  14    2.10    0.93
  -2   2 -14    0.97    0.41
  -2   2 -14    1.05    0.42
   2   2  14    1.07    0.30
   4  -2  14    5.75    1.21
  -4  -2 -14    8.13    0.77
   4   2  14    8.96    1.46
  -4   2 -14   10.32    0.96
  -6  -2 -14   10.45    1.34
   6  -2  14    7.44    1.15
   6   2  14    7.30    1.04
   6   2  14    9.55    1.71
  -6   2 -14    9.29    1.25
  -8  -2 -14    5.07    1.01
   8  -2  14    6.90    1.25
   8  -2  14    8.61    1.53
   8   2  14    7.63    1.46
   8   2  14    8.17    1.25
  -8   2 -14    6.44    1.19
  10  -2  14    2.82    0.86
  10  -2  14    2.47    0.82
  10   2  14    1.52    0.83
  10   2  14    2.99    0.97
  12  -2  14   11.98    1.83
  12  -2  14    9.22    1.50
  12   2  14   10.85    1.72
  12   2  14   11.91    1.73
 -11  -3  14    6.08    1.20
  11  -3 -14    6.90    1.66
  11   3 -14    5.81    1.56
   9  -3 -14   25.92    2.50
  -9  -3  14   24.60    2.06
  -9   3  14   25.31    1.50
   9   3 -14   23.51    2.55
  -9   3  14   24.74    1.42
   7  -3 -14    4.47    1.21
  -7  -3  14    4.26    1.04
   7   3 -14    4.01    1.20
  -7   3  14    4.89    0.79
  -7   3  14    2.76    0.79
  -5  -3  14    0.58    0.68
   5  -3 -14    1.74    0.85
  -5   3  14    0.46    0.56
   5   3 -14    1.44    0.79
  -5   3  14    0.85    0.54
  -5   3  14    0.72    0.37
  -3  -3  14   91.17    4.94
  -3  -3  14  100.68    5.24
   3  -3 -14   92.70    4.64
  -3   3  14   94.36    4.54
  -3   3  14   98.76    4.89
  -3   3  14   96.78    4.54
   3   3 -14   95.43    4.92
   1  -3 -14   63.53    3.20
  -1  -3  14   63.58    4.68
  -1  -3  14   61.95    3.56
   1   3 -14   62.46    3.43
  -1   3  14   51.70    2.86
  -1   3  14   58.68    3.58
   1  -3  14    3.74    1.47
   1   3  14    4.62    0.73
   1   3  14    4.20    0.80
   1   3  14    4.98    1.18
  -1   3 -14    3.80    0.87
  -1   3 -14    6.63    1.10
   3   3  14    4.33    0.85
   3   3  14    3.91    0.71
   3   3  14    3.81    1.13
  -3   3 -14    3.27    0.79
  -3   3 -14    2.53    0.64
   5  -3  14    0.47    0.61
  -5  -3 -14   -0.26    0.26
   5  -3  14   -0.04    0.43
   5   3  14    0.44    0.59
  -5   3 -14   -0.10    0.42
   5   3  14    0.52    0.37
   7  -3  14   18.27    1.74
   7  -3  14   15.96    1.72
  -7  -3 -14   15.88    2.50
   7   3  14   14.52    1.96
  -7   3 -14   17.33    1.69
   7   3  14   17.61    1.60
   9  -3  14    0.37    0.52
   9  -3  14    0.33    0.50
   9   3  14    0.87    0.55
   9   3  14   -0.08    0.60
  11  -3  14    0.89    0.54
  11  -3  14    0.88    0.61
  11   3  14    0.66    0.72
  11   3  14   -0.50    0.44
  10  -4 -14    4.87    1.30
 -10  -4  14    4.05    1.10
  10   4 -14    2.97    1.20
   8  -4 -14    3.14    1.00
  -8  -4  14    1.81    0.74
  -8   4  14    1.62    0.58
   8   4 -14    2.54    1.03
  -8   4  14    2.20    0.48
   6  -4 -14    0.26    0.56
  -6  -4  14    1.73    0.84
  -6   4  14    0.70    0.38
  -6   4  14    0.56    0.52
   6   4 -14    0.51    0.67
  -4  -4  14    5.37    1.15
   4  -4 -14    6.72    1.36
  -4   4  14    7.14    1.17
  -4   4  14    8.87    1.52
   4   4 -14    7.69    1.75
   2  -4 -14    7.92    1.40
  -2  -4  14    4.50    1.15
  -2  -4  14    5.61    1.23
  -2   4  14    6.20    1.27
   2   4 -14    7.03    1.45
   0  -4  14   17.10    2.29
   0   4  14   13.65    1.25
   0   4  14   12.43    1.84
   0   4 -14   13.59    1.53
   0   4 -14   15.04    1.70
   0   4  14   15.73    1.60
   2  -4  14    0.84    0.61
   2   4  14    0.19    0.54
   2   4  14    0.28    0.32
   2   4  14    1.28    0.66
  -2   4 -14    1.69    0.70
   4  -4  14    0.81    0.64
  -4   4 -14    0.23    0.51
   4   4  14    0.54    0.27
   4   4  14    0.61    0.47
   4   4  14    0.12    0.48
  -4   4 -14   -0.14    0.38
   6  -4  14    2.65    0.86
   6  -4  14    5.40    1.22
  -6  -4 -14    4.92    0.93
   6   4  14    4.38    1.10
   6   4  14    3.70    1.07
   8  -4  14    2.41    0.92
   8  -4  14    2.38    0.88
   8   4  14    5.03    1.18
   8   4  14    3.41    1.05
  10  -4  14    0.56    0.51
  10  -4  14   -1.11    0.35
  10   4  14    0.14    0.62
  10   4  14    0.17    0.48
   9  -5 -14   -0.60    0.49
  -9  -5  14    1.39    0.75
  -9   5  14    0.88    0.43
  -9   5  14   -0.40    0.23
   9   5 -14   -0.53    0.60
   7  -5 -14    3.21    1.16
  -7  -5  14    2.76    0.82
  -7   5  14    3.31    0.83
   7   5 -14    2.74    1.08
  -7   5  14    3.03    0.59
  -5  -5  14   19.40    2.03
   5  -5 -14   18.80    2.10
  -5   5  14   18.75    1.75
   5   5 -14   19.47    2.66
   3  -5 -14   11.77    1.85
  -3  -5  14    9.56    1.60
   3   5 -14   14.04    2.18
  -1  -5  14    8.99    1.52
  -1   5  14    9.73    1.79
   1   5 -14   11.46    1.89
  -1   5  14   12.82    1.69
  -1   5  14   11.94    1.82
   1  -5  14    6.48    1.31
   1   5  14    9.90    1.74
   1   5  14    6.32    1.39
   1   5  14    7.75    1.18
  -1   5 -14    8.01    1.52
   3  -5  14    4.69    1.23
   3   5  14    4.61    1.24
  -3   5 -14    5.01    1.21
   3   5  14    6.23    1.40
   3   5  14    5.92    1.10
   5  -5  14    4.39    1.16
   5   5  14    4.43    1.16
  -5   5 -14    3.79    1.08
   5   5  14    5.58    1.25
   7  -5  14    0.14    0.51
   7  -5  14    0.52    0.59
   7   5  14   -0.51    0.45
   7   5  14    0.42    0.71
   9  -5  14    0.82    0.68
   9  -5  14   -0.55    0.38
   9   5  14    0.71    0.71
   9   5  14    0.44    0.57
   8  -6 -14    0.21    0.68
  -8  -6  14    0.80    0.63
   8   6 -14   -0.20    0.61
  -8   6  14   -0.39    0.27
  -8   6  14   -0.13    0.46
  -6  -6  14    2.52    0.94
   6  -6 -14    2.37    1.05
  -6   6  14    3.33    0.86
   6   6 -14    2.69    1.08
   4  -6 -14    1.99    0.82
  -4  -6  14    0.43    0.61
  -4   6  14    0.61    0.63
   4   6 -14   -0.63    0.55
  -2  -6  14    5.40    1.31
  -2   6  14    2.39    1.03
   2   6 -14    4.38    1.38
  -2   6  14    4.29    1.18
   0  -6  14   19.87    2.07
   0   6 -14   18.82    2.18
   0   6  14   18.27    1.99
   0   6  14   19.75    2.19
   2  -6  14   31.68    2.51
   2   6  14   30.40    2.60
   2   6  14   32.73    2.81
  -2   6 -14   28.84    2.63
   4  -6  14    7.40    1.47
   4   6  14    5.00    1.20
  -4   6 -14    9.40    1.81
   6  -6  14    2.88    0.86
   6   6  14    1.92    0.89
   6   6  14    3.01    1.10
  -6   6 -14    3.19    1.10
   8  -6  14    4.47    0.99
   8  -6  14    3.38    1.17
   8   6  14    3.03    0.98
   8   6  14    3.87    1.15
   7  -7 -14    4.93    1.27
  -7  -7  14    6.76    1.35
  -7   7  14    7.41    1.71
   7   7 -14    4.76    1.45
  -5  -7  14    4.66    1.12
   5  -7 -14    4.88    1.27
   5   7 -14    5.09    1.48
  -5   7  14    7.32    1.36
  -3  -7  14    1.65    0.78
  -3   7  14    2.34    1.21
   3   7 -14    1.98    1.10
  -3   7  14    2.92    1.00
  -1  -7  14    5.47    1.22
   1   7 -14    6.95    1.55
  -1   7  14    8.43    1.87
  -1   7  14    6.16    1.35
   1  -7  14   -0.62    0.46
   1   7  14    0.39    0.79
  -1   7 -14   -0.05    0.60
   1   7  14   -0.65    0.38
   3  -7  14    3.13    1.00
  -3   7 -14    3.66    1.27
   3   7  14    5.36    1.45
   5  -7  14    3.27    0.93
  -5   7 -14    2.87    1.10
   5   7  14    0.42    0.77
   7  -7  14    1.73    0.66
  -7   7 -14    1.43    0.90
   7   7  14    0.22    0.78
   6  -8 -14    1.27    0.82
  -6  -8  14    2.52    0.96
  -6   8  14    2.22    0.92
   6   8 -14    1.79    1.03
  -4  -8  14   18.12    2.40
   4   8 -14   11.90    2.43
  -4   8  14   13.56    1.87
  -4   8  14   12.73    2.22
  -2  -8  14    0.59    0.56
  -2   8  14    0.52    0.86
   2   8 -14    0.92    0.75
  -2   8  14    1.41    0.80
   0  -8  14    0.44    0.53
   0   8 -14   -0.10    0.83
   0   8  14    1.17    0.78
   0   8  14    0.83    0.94
   2  -8  14    2.29    0.82
   2   8  14    1.94    1.13
  -2   8 -14    2.08    0.99
   4  -8  14    6.64    1.29
   4   8  14    7.51    1.82
  -4   8 -14    4.89    1.44
   6  -8  14    6.28    1.21
   6   8  14    6.84    1.66
  -1  -9  14    0.31    0.66
  -1   9  14    1.60    1.19
   1   9 -14    0.54    0.98
   1  -9  14    1.94    0.83
  -1   9 -14    2.87    1.23
   1   9  14    3.53    1.33
 -12   0  15    0.12    0.34
  12   0 -15    0.47    0.77
  10   0 -15    1.20    0.79
 -10   0  15    0.13    0.37
  10   0 -15    0.38    0.45
   8   0 -15    0.23    0.50
   8   0 -15   -0.34    0.36
  -8   0  15   -0.49    0.34
  -6   0  15    0.38    0.54
  -6   0  15   -0.06    0.44
   6   0 -15    0.23    0.34
   6   0 -15   -0.28    0.49
  -4   0  15    0.04    0.56
  -4   0  15    1.00    0.54
   4   0 -15    0.06    0.38
   4   0 -15    0.06    0.38
   2   0 -15    0.21    0.21
  -2   0  15    0.21    0.51
  -2   0  15    0.08    0.28
   2   0 -15    0.43    0.31
   0   0  15   -0.54    0.40
   2   0  15    0.34    0.55
   4   0  15    0.21    0.11
   6   0  15   -0.02    0.52
  -6   0 -15   -0.10    0.28
   6   0  15    0.08    0.22
   8   0  15    0.47    0.45
   8   0  15   -0.07    0.61
  -8   0 -15   -0.40    0.32
  10   0  15    0.64    0.57
  10   0  15   -0.23    0.38
  12   0  15   -0.09    0.50
  12   0  15   -0.36    0.57
  11  -1 -15    8.08    1.75
  11  -1 -15    6.78    1.02
 -11  -1  15    7.77    1.34
 -11   1  15    9.21    0.87
  11   1 -15    8.73    1.80
  -9  -1  15   16.69    2.25
   9  -1 -15   20.10    2.61
   9  -1 -15   13.02    1.28
   9   1 -15   14.47    2.27
  -9   1  15   12.18    1.21
  -7  -1  15   18.04    1.74
   7  -1 -15   15.94    1.79
   7  -1 -15   15.98    1.50
   7   1 -15   14.22    2.03
  -7   1  15   18.82    1.69
  -5  -1  15    2.09    0.85
   5  -1 -15    2.01    0.71
  -5  -1  15    2.05    0.83
   5  -1 -15    0.96    0.57
   5   1 -15    3.28    0.94
  -5   1  15    2.97    0.81
  -5   1  15    1.44    0.73
  -3  -1  15    0.18    0.57
  -3  -1  15    0.28    0.35
   3  -1 -15   -0.31    0.35
   3  -1 -15    0.44    0.39
  -3   1  15    0.26    0.37
  -3   1  15    0.33    0.53
   3   1 -15    0.13    0.32
   1  -1 -15    1.36    0.77
   1  -1 -15    2.08    0.39
  -1  -1  15    2.30    1.03
  -1  -1  15    1.44    0.50
  -1   1  15    1.81    0.86
  -1   1  15    1.88    0.43
   1   1 -15    1.66    0.43
   1  -1  15    0.54    0.63
  -1   1 -15    0.42    0.14
   1   1  15    0.18    0.62
  -1   1 -15    0.45    0.16
   3  -1  15   15.51    2.22
  -3   1 -15   14.40    0.79
  -3   1 -15   13.83    0.81
   5  -1  15   35.65    2.83
   5  -1  15   34.43    1.84
   5   1  15   29.08    1.59
  -5   1 -15   36.15    1.89
   5   1  15   32.10    2.65
   7  -1  15    7.26    1.07
  -7  -1 -15    6.92    1.05
   7  -1  15    5.25    1.32
   7   1  15    5.72    1.41
   7   1  15    5.67    0.91
  -7   1 -15    7.47    1.11
   9  -1  15    5.62    1.21
   9  -1  15    5.77    1.16
  -9  -1 -15    7.88    1.22
   9   1  15    7.89    1.24
   9   1  15    3.74    1.12
  -9   1 -15    7.14    1.29
  11  -1  15    5.52    1.27
  11  -1  15    5.98    1.26
  11   1  15    6.14    1.40
  11   1  15    4.89    1.10
  12  -2 -15    2.14    1.03
 -12  -2  15    1.73    0.55
  12   2 -15    3.14    1.26
 -10  -2  15    0.16    0.40
  10  -2 -15   -0.63    0.40
 -10   2  15   -0.62    0.23
  10   2 -15    0.07    0.43
 -10   2  15    0.03    0.27
  -8  -2  15    6.59    1.24
   8  -2 -15    7.91    1.65
   8   2 -15    7.02    1.51
  -8   2  15    7.14    1.17
   6  -2 -15   13.14    1.30
   6  -2 -15   13.60    1.87
  -6  -2  15   10.76    1.68
  -6   2  15   15.34    1.98
   6   2 -15   13.60    1.93
  -4  -2  15   31.97    2.89
   4  -2 -15   29.19    2.11
  -4  -2  15   31.96    2.53
  -4   2  15   34.31    2.51
   4   2 -15   31.09    2.33
  -4   2  15   26.52    1.99
   2  -2 -15    1.15    0.62
   2  -2 -15    3.06    0.69
  -2  -2  15    0.76    0.62
  -2  -2  15    1.42    0.86
  -2   2  15    3.19    1.10
  -2   2  15    2.28    0.55
   2   2 -15    1.18    0.52
   0  -2  15    0.23    0.63
   0   2  15   -0.45    0.16
   0   2 -15    0.05    0.29
   0   2  15   -0.38    0.46
   0   2 -15    0.33    0.35
   0   2  15   -0.52    0.21
   2  -2  15   88.79    6.03
  -2   2 -15   96.90    3.96
  -2   2 -15   89.58    3.85
   2   2  15   89.92    5.34
   4  -2  15   39.78    3.02
  -4   2 -15   42.36    2.27
  -4   2 -15   40.99    2.19
   4   2  15   45.86    3.13
   4   2  15   37.50    1.85
  -6  -2 -15   -0.11    0.29
   6  -2  15   -0.01    0.55
   6  -2  15   -0.01    0.28
   6   2  15    0.05    0.52
  -6   2 -15    0.22    0.34
   6   2  15   -0.46    0.25
   8  -2  15   -0.44    0.36
  -8  -2 -15   -0.53    0.45
   8  -2  15    0.45    0.39
  -8   2 -15   -0.61    0.37
   8   2  15    0.27    0.42
   8   2  15   -0.10    0.54
  10  -2  15   -0.47    0.48
  10  -2  15   -0.41    0.49
  10   2  15    0.50    0.60
  10   2  15   -0.08    0.51
  12  -2  15    2.78    0.96
  12  -2  15    1.48    0.70
  12   2  15    2.72    0.95
  12   2  15    1.95    0.79
 -11  -3  15    3.34    0.90
  11  -3 -15    3.83    1.23
   9  -3 -15    1.42    0.71
  -9  -3  15    0.64    0.64
  -9   3  15   -0.11    0.31
  -9   3  15    1.38    0.43
   9   3 -15    1.60    0.77
  -7  -3  15    0.04    0.48
   7  -3 -15    1.10    0.64
  -7   3  15    0.41    0.37
  -7   3  15    0.22    0.48
   7   3 -15   -0.38    0.51
  -5  -3  15    9.90    1.67
   5  -3 -15   10.23    1.61
  -5   3  15    8.76    1.49
   5   3 -15    8.36    1.62
  -5   3  15    8.18    1.15
  -5   3  15   10.84    1.73
   3  -3 -15   36.63    2.46
  -3  -3  15   35.94    2.79
  -3  -3  15   38.24    2.84
  -3   3  15   39.91    2.81
  -3   3  15   33.93    2.24
   3   3 -15   35.51    2.63
  -1  -3  15    0.35    0.56
  -1  -3  15    1.06    0.68
  -1   3  15    0.89    0.70
   1   3 -15    0.81    0.57
  -1   3  15    0.54    0.38
   1  -3  15   71.23    4.12
  -1   3 -15   68.64    3.46
  -1   3 -15   67.51    3.40
   1   3  15   68.75    3.96
   1   3  15   66.70    3.22
   1   3  15   57.63    2.87
   3  -3  15   -0.07    0.51
  -3   3 -15    0.22    0.39
   3   3  15   -0.10    0.54
   3   3  15    0.18    0.28
  -3   3 -15    0.43    0.39
   3   3  15   -0.07    0.28
   5  -3  15   28.18    2.40
  -5  -3 -15   22.40    1.61
   5   3  15   23.88    1.66
  -5   3 -15   25.12    1.82
   5   3  15   23.58    2.29
   7  -3  15    7.13    1.40
  -7  -3 -15    6.31    1.07
   7  -3  15    7.00    1.30
   7   3  15    5.48    0.98
  -7   3 -15    5.59    1.10
   7   3  15    3.97    1.24
   9  -3  15    1.59    0.83
   9  -3  15    3.68    1.14
   9   3  15    3.97    0.94
   9   3  15    3.19    1.03
  11  -3  15   -0.03    0.47
  11  -3  15   -0.32    0.59
  11   3  15   -0.28    0.50
  11   3  15   -0.57    0.49
 -10  -4  15    0.83    0.61
  10  -4 -15    0.63    0.89
  10   4 -15    0.56    0.71
   8  -4 -15    1.01    0.76
  -8  -4  15    0.95    0.60
   8   4 -15    1.20    0.78
  -8   4  15    0.87    0.58
   6  -4 -15    1.79    0.76
  -6  -4  15    0.32    0.59
  -6   4  15    2.00    0.76
  -6   4  15    1.03    0.35
   6   4 -15    1.34    0.80
   4  -4 -15   -0.13    0.49
  -4  -4  15    0.90    0.63
   4   4 -15    0.92    1.11
  -4   4  15   -0.10    0.47
  -2  -4  15   87.34    4.80
   2  -4 -15   85.98    4.43
  -2  -4  15   86.33    4.87
   2   4 -15   88.30    4.71
   0  -4  15   87.25    4.76
   0   4  15   84.64    4.01
   0   4 -15   90.83    4.58
   0   4  15   84.66    4.69
   0   4  15   79.82    4.27
   0   4 -15   89.89    4.52
   2  -4  15   13.08    2.02
   2   4  15   11.71    1.32
  -2   4 -15   11.62    1.63
   2   4  15   12.00    1.81
   2   4  15   11.04    1.05
   4  -4  15    1.08    0.77
  -4   4 -15    1.23    0.49
  -4   4 -15    0.52    0.59
   4   4  15    0.65    0.55
   4   4  15    1.25    0.41
   4   4  15    1.09    0.65
   6  -4  15   36.36    2.77
  -6  -4 -15   35.05    2.39
   6  -4  15   38.46    2.67
   6   4  15   36.33    2.48
   6   4  15   40.52    2.93
   8  -4  15    1.07    0.72
   8  -4  15    0.91    0.70
   8   4  15    1.45    0.86
   8   4  15    0.29    0.47
  10  -4  15    1.44    0.73
  10  -4  15    1.48    0.82
  10   4  15    0.94    0.74
  10   4  15    1.32    0.65
  -9  -5  15    0.17    0.52
   9  -5 -15    0.75    0.79
   9   5 -15   -0.52    0.62
  -9   5  15   -0.30    0.28
  -7  -5  15    2.30    0.93
   7  -5 -15    1.07    0.75
   7   5 -15    1.72    0.93
  -7   5  15    1.92    0.65
  -7   5  15    1.67    0.50
  -5  -5  15    7.60    1.48
   5  -5 -15    8.04    1.66
  -5   5  15    6.19    1.30
   5   5 -15    6.33    1.56
   3  -5 -15   41.90    3.05
  -3  -5  15   43.80    3.18
   3   5 -15   40.05    3.14
  -3   5  15   48.51    3.11
  -1  -5  15    0.60    0.35
  -1   5  15    0.04    0.36
   1   5 -15    0.36    0.54
  -1   5  15    0.86    0.68
  -1   5  15    0.73    0.76
   1  -5  15   54.12    3.52
   1   5  15   55.28    3.45
   1   5  15   53.56    3.48
   1   5  15   50.35    2.95
  -1   5 -15   49.58    3.38
   3  -5  15    0.73    0.59
   3   5  15    0.22    0.45
   3   5  15   -0.54    0.41
   3   5  15   -0.36    0.59
  -3   5 -15    0.12    0.56
   5  -5  15    9.46    1.70
   5   5  15   14.61    2.22
   5   5  15    9.24    1.53
   5   5  15    9.91    1.43
  -5   5 -15   12.87    1.89
   7  -5  15    6.75    1.35
   7  -5  15    7.00    1.35
   7   5  15    4.58    1.22
   9  -5  15    7.72    1.54
   9  -5  15    4.24    0.88
   9   5  15    7.29    1.39
  -8  -6  15    0.83    0.62
   8  -6 -15   -0.02    0.67
   8   6 -15    0.45    0.67
  -8   6  15   -0.26    0.30
  -8   6  15    0.02    0.45
   6  -6 -15    3.60    1.13
  -6  -6  15    5.20    1.20
  -6   6  15    3.08    1.45
   6   6 -15    5.43    1.49
   4  -6 -15   11.05    1.80
  -4  -6  15   12.06    1.88
   4   6 -15   12.18    2.14
  -4   6  15   14.84    1.90
  -2  -6  15    2.43    0.97
  -2   6  15    2.33    1.01
   2   6 -15    3.48    1.17
  -2   6  15    2.96    1.21
   0  -6  15    6.24    1.41
   0   6  15    8.35    1.62
   0   6 -15    6.16    1.43
   0   6  15    8.10    1.74
   2  -6  15   47.57    3.34
   2   6  15   48.45    3.36
   2   6  15   60.34    3.80
  -2   6 -15   48.38    3.44
   4  -6  15   14.19    2.01
   4   6  15   16.17    2.86
  -4   6 -15   18.13    2.05
   4   6  15   16.84    2.35
   6  -6  15    5.62    1.19
  -6   6 -15    7.04    1.48
   6   6  15    4.13    1.29
   6   6  15    5.68    1.39
   8  -6  15    2.75    0.82
   8   6  15    3.20    1.05
   8   6  15    4.29    1.15
  -7  -7  15    4.14    1.22
   7  -7 -15    3.82    1.34
  -7   7  15    4.67    0.95
   7   7 -15    3.84    1.30
  -5  -7  15    4.32    1.33
   5  -7 -15    6.27    1.47
   5   7 -15    8.01    1.72
  -5   7  15    4.22    1.10
  -3  -7  15    3.31    0.99
  -3   7  15    2.82    1.08
   3   7 -15    3.44    1.26
  -3   7  15    3.03    1.02
  -1  -7  15    0.66    0.64
   1   7 -15   -0.35    0.72
  -1   7  15    1.12    0.84
  -1   7  15    0.78    0.64
   1  -7  15   14.83    2.08
   1   7  15   20.44    2.64
  -1   7 -15   18.72    2.59
   1   7  15   18.40    2.59
   3  -7  15    3.50    0.90
   3   7  15    5.11    1.43
  -3   7 -15    4.38    1.28
   3   7  15    6.77    1.62
   5  -7  15   27.22    2.25
  -5   7 -15   32.90    2.85
   5   7  15   33.03    2.75
   5   7  15   22.87    2.42
   7  -7  15    0.06    0.39
   7   7  15    0.15    0.56
  -7   7 -15    0.60    0.81
   7   7  15    0.14    0.74
  -4  -8  15    9.34    1.83
  -4   8  15   15.80    2.66
  -4   8  15   14.52    1.93
  -2  -8  15    3.67    1.13
  -2   8  15    3.66    1.15
  -2   8  15    2.66    1.08
   2   8 -15    1.99    1.17
   0  -8  15    1.27    0.81
   0   8  15    0.66    0.75
   0   8 -15    2.54    1.10
   0   8  15    1.78    0.86
   2  -8  15    8.90    1.66
   2   8  15    7.91    1.71
  -2   8 -15    8.41    1.79
   2   8  15   14.08    2.33
   4  -8  15    0.54    0.59
   4   8  15    1.83    0.94
  -4   8 -15    1.13    0.87
   4   8  15    0.20    0.57
  12   0 -16    0.45    0.73
 -10   0  16   53.34    2.88
  10   0 -16   49.79    3.57
  -8   0  16   24.56    1.99
   8   0 -16   22.58    2.23
   6   0 -16    3.32    0.92
  -6   0  16    3.68    1.02
  -4   0  16   33.06    2.30
   4   0 -16   32.62    2.19
  -4   0  16   33.21    2.64
   2   0 -16   35.25    1.86
  -2   0  16   35.44    2.80
  -2   0  16   31.63    1.97
   0   0  16   21.36    2.24
   2   0  16   77.46    4.62
   4   0  16    5.99    1.22
   6   0  16   55.26    2.59
  -6   0 -16   55.82    2.68
   6   0  16   61.20    3.84
   8   0  16    0.84    0.42
   8   0  16    0.09    0.73
  -8   0 -16    0.14    0.46
  10   0  16   13.52    1.96
  10   0  16   13.17    1.41
  12   0  16   14.06    1.50
  12   0  16   10.63    1.65
  11  -1 -16   23.19    1.76
 -11  -1  16   28.42    1.95
  11  -1 -16   32.45    2.82
 -11   1  16   24.29    1.59
  11   1 -16   26.20    2.54
   9  -1 -16    2.57    0.75
  -9  -1  16    2.33    0.73
   9  -1 -16    2.88    1.13
  -9   1  16    2.88    0.72
   9   1 -16    2.08    1.05
   7  -1 -16   25.17    2.18
   7  -1 -16   22.68    1.87
  -7  -1  16   25.89    2.14
   7   1 -16   25.34    2.26
  -7   1  16   23.45    2.04
  -5  -1  16    6.65    1.36
   5  -1 -16    7.43    1.34
  -5   1  16    7.22    1.46
   5   1 -16    7.09    1.32
  -5   1  16    8.14    1.28
   3  -1 -16   14.97    1.25
  -3  -1  16   17.48    2.55
  -3  -1  16   13.03    1.41
  -3   1  16   13.93    1.24
  -3   1  16   18.12    2.42
   3   1 -16   13.75    1.24
  -1  -1  16    0.42    0.76
  -1  -1  16    0.29    0.33
   1  -1 -16    0.35    0.21
  -1   1  16   -0.04    0.27
   1   1 -16    0.11    0.22
  -1   1  16    0.19    0.47
   1  -1  16    6.70    1.72
   3  -1  16   64.73    4.09
   3   1  16   65.85    4.08
   5  -1  16   39.39    3.03
  -5  -1 -16   39.27    1.85
   5  -1  16   41.22    2.07
   5   1  16   42.61    3.16
   5   1  16   41.04    1.80
  -5   1 -16   45.03    2.09
   7  -1  16   21.75    2.23
  -7  -1 -16   20.70    1.53
   7  -1  16   22.27    1.55
   7   1  16   22.86    2.26
  -7   1 -16   22.19    1.61
   7   1  16   19.72    1.41
   9  -1  16    1.88    0.82
   9  -1  16    3.41    0.84
  -9  -1 -16    3.81    0.80
  -9   1 -16    2.23    0.79
   9   1  16    2.04    0.90
   9   1  16    3.65    0.86
  11  -1  16   21.61    1.91
  11  -1  16   18.31    2.36
  11   1  16   19.57    1.75
  11   1  16   16.64    2.24
 -12  -2  16    0.85    0.50
  12  -2 -16    0.93    0.81
  12   2 -16    1.40    0.95
  10  -2 -16   13.56    2.17
 -10  -2  16   14.93    1.50
 -10   2  16   12.23    1.14
  10   2 -16   12.37    2.08
   8  -2 -16   -0.08    0.39
   8  -2 -16   -0.28    0.49
  -8  -2  16    0.13    0.47
   8   2 -16    0.47    0.58
  -8   2  16   -0.26    0.37
   6  -2 -16   38.99    2.59
  -6  -2  16   47.40    3.15
   6  -2 -16   46.48    3.03
  -6   2  16   48.04    3.03
   4  -2 -16    9.80    1.40
  -4  -2  16    7.34    1.28
  -4  -2  16    7.78    1.50
  -4   2  16    9.59    1.31
  -4   2  16   10.04    1.65
   4   2 -16   11.56    1.68
  -2  -2  16    0.34    0.37
  -2  -2  16   -0.24    0.46
   2  -2 -16    0.83    0.39
   2   2 -16    0.26    0.35
  -2   2  16    0.39    0.29
  -2   2  16    0.43    0.71
   0  -2  16    6.23    1.43
   0   2 -16    9.20    0.91
   0   2  16    7.25    0.59
   0   2  16   12.16    2.42
   0   2 -16    7.22    0.82
   0   2  16    7.97    0.69
   2  -2  16    1.27    0.90
   2   2  16    0.83    0.64
  -2   2 -16    1.35    0.44
  -2   2 -16    1.56    0.38
   4  -2  16    0.26    0.47
  -4   2 -16    0.20    0.33
   4   2  16   -0.04    0.16
   4   2  16   -0.03    0.16
   4   2  16   -0.11    0.50
  -4   2 -16   -0.28    0.23
  -6  -2 -16   39.20    2.17
   6  -2  16   39.29    3.04
   6  -2  16   43.13    2.39
   6   2  16   38.20    3.02
  -6   2 -16   43.30    2.35
   6   2  16   37.80    2.08
   8  -2  16    2.85    0.86
   8  -2  16    1.56    0.79
  -8  -2 -16    3.46    0.80
  -8   2 -16    1.66    0.62
   8   2  16    2.65    0.99
   8   2  16    3.23    0.71
  10  -2  16   18.26    1.93
  10  -2  16   19.99    1.80
  10   2  16   23.61    2.24
  12  -2  16    0.06    0.58
  12  -2  16    0.50    0.66
  12   2  16    1.24    0.67
  12   2  16    1.48    0.78
 -11  -3  16    0.76    0.56
  11   3 -16    0.26    0.64
  -9  -3  16    7.12    1.28
   9  -3 -16    4.67    1.23
  -9   3  16    6.45    1.02
   9   3 -16    6.39    1.46
   7  -3 -16   21.70    2.09
  -7  -3  16   18.83    1.95
   7   3 -16   17.78    2.41
  -7   3  16   24.14    1.91
  -7   3  16   17.06    1.38
  -5  -3  16    3.05    0.88
   5  -3 -16    2.90    0.96
  -5   3  16    2.44    0.87
   5   3 -16    3.37    1.04
  -3  -3  16    1.44    0.78
  -3  -3  16    2.54    0.81
   3  -3 -16    1.60    0.61
  -3   3  16    1.30    0.75
   3   3 -16    1.71    0.69
  -3   3  16    1.75    0.56
  -1  -3  16    9.50    1.75
  -1   3  16    8.60    1.53
   1   3 -16   10.74    1.43
  -1   3  16    7.01    0.96
   1  -3  16   54.52    3.52
   1   3  16   52.18    2.56
  -1   3 -16   48.24    2.73
   1   3  16   54.05    3.45
  -1   3 -16   48.84    2.69
   1   3  16   41.38    2.18
   3  -3  16    3.29    1.05
   3   3  16    4.31    0.62
   3   3  16    3.71    0.65
  -3   3 -16    4.62    0.90
   3   3  16    4.63    1.25
  -3   3 -16    4.92    0.96
   5  -3  16    0.66    0.56
  -5   3 -16    1.16    0.42
   5   3  16    2.46    0.97
  -5   3 -16    1.02    0.61
   5   3  16    0.60    0.41
  -7  -3 -16   37.74    2.42
   7  -3  16   42.53    2.68
   7  -3  16   41.95    2.96
   7   3  16   43.92    2.50
  -7   3 -16   41.00    2.60
   7   3  16   46.36    3.22
   9  -3  16   15.19    2.00
   9  -3  16   15.45    1.62
   9   3  16   18.64    1.66
   9   3  16   16.23    2.25
  11  -3  16    0.84    0.63
  11  -3  16    1.56    0.65
  11   3  16    2.38    0.86
  11   3  16    2.15    0.85
  10  -4 -16    2.75    1.06
 -10  -4  16    3.24    0.96
  10   4 -16    2.13    1.18
 -10   4  16    3.74    0.62
 -10   4  16    3.27    0.46
  -8  -4  16    0.53    0.59
   8  -4 -16    1.57    0.74
   8   4 -16    0.69    0.57
  -8   4  16   -0.43    0.29
  -8   4  16   -0.06    0.47
   6  -4 -16    6.18    1.31
  -6  -4  16    5.12    1.15
   6   4 -16    5.65    1.36
  -6   4  16    5.00    1.19
  -4  -4  16    1.15    0.71
   4  -4 -16    0.31    0.48
  -4   4  16    0.19    0.53
   4   4 -16    0.83    0.64
  -2  -4  16    1.75    0.67
   2  -4 -16    0.76    0.60
  -2  -4  16    0.20    0.50
  -2   4  16    1.18    0.80
   2   4 -16   -0.02    0.49
   0  -4  16    5.86    1.27
   0   4  16    8.07    0.92
   0   4  16    7.81    1.35
   0   4 -16   11.01    1.58
   0   4 -16    7.22    1.32
   0   4  16    9.08    1.72
   2  -4  16    4.14    1.21
   2   4  16    1.99    0.98
  -2   4 -16    2.49    0.79
   2   4  16    2.49    0.67
   2   4  16    3.03    0.83
   4  -4  16    2.53    0.87
  -4   4 -16    2.95    0.80
   4   4  16    1.82    0.89
  -4   4 -16    3.83    0.98
   4   4  16    3.18    0.71
   4   4  16    2.20    0.51
   6  -4  16    4.46    1.22
  -6  -4 -16    4.08    0.85
   6   4  16    3.95    1.16
   6   4  16    2.26    0.76
   8  -4  16    1.36    0.73
   8  -4  16    1.33    0.81
   8   4  16    2.17    0.74
   8   4  16    1.28    0.71
  10  -4  16    1.21    0.57
  10  -4  16    2.35    0.92
  10   4  16    2.10    0.75
   9  -5 -16    4.31    1.28
  -9  -5  16    4.79    1.21
   9   5 -16    4.58    1.38
  -9   5  16    5.10    0.92
  -7  -5  16    1.82    0.82
   7  -5 -16    2.39    0.94
   7   5 -16    2.33    0.99
  -7   5  16    1.14    0.73
   5  -5 -16    4.30    1.16
  -5  -5  16    3.85    1.25
  -5   5  16    3.81    1.03
   5   5 -16    3.93    1.26
   3  -5 -16    2.95    1.03
  -3  -5  16    4.92    1.19
   3   5 -16    3.52    1.14
  -3   5  16    4.75    1.19
  -1  -5  16    8.49    1.53
  -1   5  16   11.80    1.91
  -1   5  16    9.85    1.39
  -1   5  16   12.28    1.84
   1  -5  16    1.61    0.76
   1   5  16    2.24    0.83
  -1   5 -16    2.34    0.89
   1   5  16    2.28    0.76
   1   5  16    1.52    0.90
   3  -5  16    1.57    0.81
  -3   5 -16    3.13    1.02
   3   5  16    3.21    0.91
   3   5  16    2.01    0.64
   3   5  16    2.41    0.98
   5  -5  16   12.40    1.78
  -5   5 -16   10.11    1.66
   5   5  16   12.36    1.74
   5   5  16    7.31    1.52
   5   5  16   10.62    1.17
   7  -5  16    0.87    0.74
   7   5  16    1.45    0.76
   7   5  16    2.63    1.00
   9  -5  16    1.32    0.81
   9  -5  16    0.43    0.57
   9   5  16    2.35    0.95
   9   5  16    0.96    0.77
   8  -6 -16    2.56    1.13
  -8  -6  16    0.78    0.76
  -8   6  16    1.21    0.64
  -6  -6  16   10.41    1.70
   6  -6 -16    8.72    1.66
   6   6 -16   11.94    2.08
  -6   6  16   11.35    1.70
  -4  -6  16   19.52    2.05
   4  -6 -16   19.10    2.12
  -4   6  16   25.82    2.19
   4   6 -16   17.84    2.51
  -2  -6  16    7.80    1.57
  -2   6  16    9.72    1.75
  -2   6  16   11.50    1.85
   2   6 -16    9.14    1.72
   0  -6  16    0.47    0.60
   0   6  16    0.22    0.65
   0   6 -16    0.08    0.61
   0   6  16    0.24    0.56
   2  -6  16   -0.03    0.57
   2   6  16   -0.38    0.51
   2   6  16    1.27    0.81
  -2   6 -16    0.52    0.57
   4  -6  16    1.95    0.78
   4   6  16    2.32    0.86
   4   6  16    3.14    1.10
  -4   6 -16    3.90    1.17
   6  -6  16    0.06    0.47
   6   6  16    0.39    0.64
   6   6  16    1.20    0.79
  -6   6 -16    0.74    0.79
   8  -6  16    3.72    0.90
   8   6  16    4.28    1.18
   8   6  16    3.32    1.00
  -7  -7  16    3.39    1.20
   7  -7 -16    0.69    0.83
  -7   7  16    1.52    0.73
   7   7 -16    1.85    0.97
  -5  -7  16    0.06    0.53
   5  -7 -16   -0.31    0.52
  -5   7  16    0.13    0.55
   5   7 -16    1.24    0.92
  -3  -7  16    1.92    0.93
  -3   7  16    1.04    0.66
   3   7 -16    0.66    0.67
  -3   7  16    0.10    0.64
  -1  -7  16    2.39    0.95
  -1   7  16    2.26    0.99
   1   7 -16    2.33    1.06
  -1   7  16    2.27    0.89
   1  -7  16    0.51    0.60
  -1   7 -16    1.09    0.72
   1   7  16    0.12    0.71
   1   7  16   -0.71    0.50
   3  -7  16    8.13    1.51
   3   7  16    8.25    1.69
   3   7  16    6.77    1.46
  -3   7 -16    8.90    1.79
   5  -7  16    0.66    0.64
   5   7  16    1.36    0.79
  -5   7 -16    2.04    1.01
   5   7  16   -0.30    0.48
   7  -7  16    0.79    0.56
   7   7  16    1.01    0.69
  -7   7 -16    1.58    0.98
   7   7  16    0.93    0.71
  -4  -8  16    0.52    0.63
  -4   8  16   -1.39    0.61
   4   8 -16   -0.18    0.62
  -4   8  16    0.05    0.58
  -2  -8  16    6.54    1.38
   2   8 -16    9.96    1.92
  -2   8  16    9.92    1.73
  -2   8  16    6.91    1.71
   0  -8  16   17.53    2.40
   0   8  16   14.12    2.29
   0   8  16   16.80    2.30
   0   8 -16   15.82    2.33
   2  -8  16   11.56    1.80
   2   8  16   10.42    1.86
   2   8  16   11.30    2.05
  -2   8 -16    9.51    1.88
   4  -8  16    1.18    0.72
  -4   8 -16    0.44    0.67
   4   8  16    1.07    0.83
 -12   0  17   -0.85    0.34
  12   0 -17    0.12    0.60
  10   0 -17   -0.07    0.62
  -8   0  17   -0.40    0.38
   8   0 -17    0.15    0.51
   6   0 -17    0.19    0.54
   4   0 -17   -0.22    0.35
  -4   0  17   -0.11    0.37
  -2   0  17   -0.14    0.45
   2   0 -17    0.15    0.21
  -2   0  17    0.09    0.28
   0   0  17   -0.43    0.42
   2   0  17   -0.03    0.43
   4   0  17   -0.75    0.35
  -6   0 -17    0.49    0.30
   6   0  17   -0.20    0.17
   6   0  17    0.18    0.61
  -8   0 -17   -0.35    0.34
   8   0  17    0.21    0.33
   8   0  17    0.28    0.68
  10   0  17    0.20    0.44
  10   0  17   -0.52    0.41
  12   0  17   -0.20    0.51
  12   0  17   -0.02    0.51
  11  -1 -17    2.26    0.91
 -11  -1  17    0.75    0.43
  11  -1 -17    1.83    0.81
  11   1 -17    1.92    1.01
 -11   1  17    1.29    0.48
  -9  -1  17    1.42    0.61
   9  -1 -17    1.73    0.75
   9   1 -17    1.34    0.85
  -9   1  17    0.94    0.58
   7  -1 -17    0.05    0.48
  -7  -1  17   -0.20    0.41
   7   1 -17    1.28    0.67
  -7   1  17    0.61    0.58
  -5  -1  17    1.96    0.90
  -5  -1  17    1.45    0.76
   5  -1 -17    2.35    0.70
  -5   1  17    0.63    0.48
  -5   1  17    2.05    0.84
   5   1 -17    2.27    0.74
  -3  -1  17    1.96    0.87
   3  -1 -17    4.18    0.78
  -3  -1  17    3.90    0.93
   3   1 -17    4.48    0.84
  -3   1  17    2.17    0.48
  -3   1  17    1.86    0.85
  -1  -1  17   56.69    2.83
   1  -1 -17   66.96    2.52
  -1  -1  17   65.20    4.06
   1   1 -17   60.35    3.01
  -1   1  17   59.09    2.56
  -1   1  17   63.74    4.01
   1  -1  17   22.83    2.22
   1   1  17   20.97    2.24
   3  -1  17    3.08    0.96
   3   1  17    8.03    1.70
   5  -1  17    4.05    1.25
   5   1  17    6.38    1.47
  -7  -1 -17    0.46    0.41
   7  -1  17    1.36    0.47
   7  -1  17    1.18    0.84
   7   1  17    0.73    0.35
  -7   1 -17    1.32    0.43
   7   1  17    0.09    0.84
   9  -1  17    1.31    0.84
   9  -1  17    0.95    0.51
  -9  -1 -17   -0.31    0.47
   9   1  17    0.97    0.69
   9   1  17    0.84    0.47
  -9   1 -17    0.50    0.48
  11  -1  17    1.12    0.64
  11  -1  17    2.42    0.80
  11   1  17    0.65    0.76
  11   1  17    1.13    0.71
  10  -2 -17    8.07    1.62
 -10  -2  17    9.32    1.50
 -10   2  17    8.02    1.09
  10   2 -17    6.39    1.60
   8  -2 -17    0.54    0.38
  -8  -2  17    1.00    0.61
   8  -2 -17    0.14    0.59
   8   2 -17   -0.02    0.59
  -8   2  17    0.32    0.54
  -6  -2  17    1.18    0.70
   6  -2 -17    0.80    0.53
   6   2 -17    1.25    0.62
  -6   2  17    1.33    0.70
   4  -2 -17   32.00    2.23
  -4  -2  17   33.42    2.66
  -4  -2  17   34.55    2.53
  -4   2  17   32.74    2.60
  -4   2  17   32.21    2.15
   4   2 -17   35.25    2.40
  -2  -2  17   33.74    2.32
  -2  -2  17   32.62    2.73
   2  -2 -17   34.55    1.99
  -2   2  17   31.32    1.88
  -2   2  17   36.02    2.82
   2   2 -17   35.35    2.14
   0  -2  17    0.47    0.58
   0   2  17    1.61    0.80
   0   2 -17    0.43    0.35
   0   2  17    0.32    0.19
   0   2 -17    0.64    0.33
   0   2  17    0.08    0.15
   2  -2  17    0.66    0.68
   2   2  17    3.48    1.25
  -2   2 -17    2.81    0.51
   4  -2  17    0.32    0.70
  -4   2 -17    1.04    0.35
   4   2  17    0.29    0.55
  -4   2 -17   -0.08    0.23
   6  -2  17    9.89    1.92
   6  -2  17    8.08    1.11
  -6  -2 -17    5.51    0.74
   6   2  17    5.06    0.70
   6   2  17    6.49    1.41
  -6   2 -17    7.59    1.00
  -8  -2 -17   -0.13    0.38
   8  -2  17    1.05    0.60
   8  -2  17    1.55    0.82
   8   2  17    0.96    0.59
   8   2  17    0.51    0.43
  -8   2 -17    1.13    0.50
  10  -2  17    0.16    0.56
  10  -2  17   -0.48    0.50
  10   2  17   -0.36    0.52
  10   2  17   -0.52    0.35
  11  -3 -17   -0.15    0.53
 -11  -3  17   -0.17    0.44
  11   3 -17   -0.28    0.54
 -11   3  17   -0.12    0.24
   9  -3 -17   12.99    1.86
  -9  -3  17   11.90    1.74
  -9   3  17    7.41    0.98
  -9   3  17    8.16    1.20
   9   3 -17    7.77    1.67
   7  -3 -17    0.66    0.65
  -7  -3  17    0.08    0.56
   7   3 -17   -0.08    0.56
  -7   3  17   -0.11    0.52
  -5  -3  17   41.30    3.12
   5  -3 -17   42.77    2.80
  -5   3  17   42.03    2.96
  -3  -3  17    5.14    1.25
   3  -3 -17    7.39    1.17
  -3  -3  17    3.53    1.14
  -3   3  17    6.23    1.00
   3   3 -17    5.42    1.06
  -3   3  17    5.12    1.30
  -1  -3  17   24.16    2.33
  -1   3  17   24.94    2.36
   1   3 -17   23.71    1.82
  -1   3  17   23.68    1.69
  -1   3  17   18.89    1.36
   1  -3  17    1.05    0.67
  -1   3 -17    2.08    0.57
   1   3  17    0.49    0.67
   1   3  17    1.57    0.46
  -1   3 -17    1.68    0.51
   1   3  17    1.10    0.32
   3  -3  17   10.19    1.90
   3   3  17    7.31    0.68
  -3   3 -17   10.70    1.07
   3   3  17    8.25    0.84
  -3   3 -17    7.97    0.91
   3   3  17    8.31    1.63
   5  -3  17    0.37    0.65
  -5   3 -17    1.50    0.55
   5   3  17    0.09    0.67
   5   3  17    1.04    0.30
  -5   3 -17    0.76    0.48
   5   3  17    1.16    0.38
   7  -3  17    7.56    1.26
  -7  -3 -17    7.51    1.09
   7  -3  17    6.35    1.45
  -7   3 -17    6.97    1.09
   7   3  17    6.69    1.44
   7   3  17    7.50    1.05
   9  -3  17    0.34    0.49
   9  -3  17    0.24    0.61
   9   3  17   -0.01    0.37
   9   3  17    0.01    0.53
  11  -3  17    8.96    1.45
  11  -3  17    7.76    1.31
  11   3  17    6.59    1.24
  11   3  17    7.04    1.44
 -10  -4  17    0.80    0.67
  10  -4 -17   -0.05    0.58
  10   4 -17    1.48    1.02
 -10   4  17    1.60    0.46
  -8  -4  17   31.10    2.54
   8  -4 -17   29.68    2.59
  -8   4  17   29.71    2.21
   8   4 -17   35.97    2.96
  -8   4  17   36.13    2.17
   6  -4 -17   59.26    3.73
  -6  -4  17   64.57    3.98
   6   4 -17   59.13    3.91
  -6   4  17   65.04    3.70
   4  -4 -17    1.68    0.62
  -4  -4  17    1.82    0.90
  -4   4  17    1.21    0.77
   4   4 -17    3.25    1.00
  -2  -4  17   11.60    1.77
  -2  -4  17   10.54    1.80
   2   4 -17   10.24    1.59
  -2   4  17   19.99    2.88
  -2   4  17   12.07    1.89
   0  -4  17   11.09    1.81
   0   4  17   14.50    1.24
   0   4 -17   14.60    1.48
   0   4 -17   16.67    1.68
   0   4  17   16.13    1.49
   0   4  17   20.35    2.07
   2  -4  17    9.63    1.69
  -2   4 -17    8.92    1.42
   2   4  17    8.60    0.89
   2   4  17    8.43    1.16
   2   4  17    8.26    1.64
   4  -4  17    1.35    0.71
   4   4  17    2.61    1.12
  -4   4 -17    2.57    0.83
   4   4  17    1.87    0.45
   4   4  17    1.11    0.42
  -4   4 -17    1.14    0.53
   6  -4  17    1.29    0.87
  -6   4 -17    0.64    0.58
   6   4  17    0.48    0.47
   6   4  17    2.00    0.92
  -8  -4 -17   10.16    1.96
   8  -4  17   11.84    1.76
   8  -4  17   13.83    1.59
   8   4  17   13.28    1.42
   8   4  17   13.03    1.99
  10  -4  17   14.19    1.88
  10  -4  17   15.49    2.02
  10   4  17   13.76    1.49
  10   4  17   13.78    2.03
  -9  -5  17   11.81    1.97
   9  -5 -17    8.29    1.72
  -9   5  17    8.77    1.24
  -7  -5  17    0.71    0.62
   7  -5 -17    1.04    0.62
  -7   5  17    0.34    0.53
   7   5 -17    1.28    0.82
   5  -5 -17   49.16    3.34
  -5  -5  17   54.65    3.59
  -5   5  17   52.28    3.31
   5   5 -17   47.63    3.51
   3  -5 -17   12.73    1.83
  -3  -5  17   13.21    2.10
   3   5 -17   10.92    1.76
  -3   5  17   10.75    1.82
  -1  -5  17    9.81    1.68
  -1   5  17   10.13    1.53
   1   5 -17    9.25    1.93
  -1   5  17    9.54    1.67
  -1   5  17   10.41    1.18
   1  -5  17    3.65    1.32
   1   5  17    4.24    1.09
   1   5  17    4.55    1.26
  -1   5 -17    2.94    0.96
   3  -5  17   13.55    2.02
   3   5  17   20.57    1.82
  -3   5 -17   18.31    1.90
   3   5  17   16.46    2.20
   5  -5  17    0.40    0.60
   5   5  17   -0.10    0.58
  -5   5 -17    0.03    0.46
   5   5  17    0.59    0.33
   5   5  17    0.38    0.47
   7  -5  17   10.83    1.60
   7   5  17   13.39    1.79
   7   5  17   12.40    1.95
  -7   5 -17   13.56    2.05
   9  -5  17    3.66    1.17
   9  -5  17    4.30    1.07
   9   5  17    2.85    0.93
   9   5  17    3.63    1.01
  -8  -6  17    0.78    0.62
   8  -6 -17   -0.22    0.56
  -8   6  17   -0.13    0.36
   8   6 -17    0.53    0.75
  -6  -6  17    2.84    1.12
   6  -6 -17    5.11    1.25
   6   6 -17    4.06    1.34
  -6   6  17    7.76    1.44
   4  -6 -17   18.53    2.04
  -4  -6  17   19.94    2.62
   4   6 -17   15.88    2.25
  -4   6  17   17.19    2.23
  -2  -6  17   28.49    2.58
  -2   6  17   28.41    2.50
   2   6 -17   27.34    2.53
  -2   6  17   24.99    2.44
   0  -6  17    6.14    1.38
   0   6 -17    4.56    1.24
   0   6  17    3.54    1.15
   0   6  17    4.74    1.24
   2  -6  17    0.03    0.46
   2   6  17    1.50    0.93
   2   6  17    0.74    0.76
  -2   6 -17    1.38    0.80
   4  -6  17    1.61    0.76
  -4   6 -17    2.53    0.94
   4   6  17    2.46    0.86
   4   6  17    2.00    0.82
   6  -6  17    0.56    0.63
  -6   6 -17    0.29    0.69
   6   6  17    0.05    0.58
   6   6  17    1.23    0.78
   8  -6  17   -0.57    0.48
  -8   6 -17    0.86    0.72
   8   6  17   -0.95    0.48
   8   6  17   -0.15    0.40
   5  -7 -17    5.05    1.31
  -5  -7  17    6.20    1.44
   5   7 -17    3.83    1.27
  -5   7  17    5.69    1.26
  -3  -7  17    0.97    0.77
   3   7 -17    0.33    0.64
  -3   7  17    1.23    0.79
  -3   7  17    0.43    0.76
  -1  -7  17   28.36    2.54
   1   7 -17   21.54    2.37
  -1   7  17   25.46    2.42
  -1   7  17   28.29    2.69
   1  -7  17    4.62    1.11
  -1   7 -17    3.81    1.15
   1   7  17    5.23    1.39
   1   7  17    3.42    1.12
   3  -7  17    1.02    0.79
   3   7  17    1.41    0.90
  -3   7 -17    1.35    0.75
   5  -7  17   17.16    1.85
   5   7  17   17.44    1.99
  -5   7 -17   17.01    2.47
   5   7  17   17.40    2.40
  -2  -8  17    1.24    0.68
  -2   8  17    2.71    0.93
  -2   8  17    1.40    0.91
   2   8 -17    0.69    0.78
   0  -8  17    8.16    1.63
   0   8  17    4.15    1.33
   0   8  17    4.90    1.41
   0   8 -17    8.12    1.61
   2  -8  17    1.27    0.77
   2   8  17    0.76    0.73
   2   8  17    0.38    0.74
  -2   8 -17    2.55    1.12
 -10   0  18    1.28    0.66
  10   0 -18    0.65    0.61
   8   0 -18    5.32    1.21
  -8   0  18    4.72    1.09
  -6   0  18   15.02    2.15
   6   0 -18   14.39    1.85
  -4   0  18   33.02    2.17
  -4   0  18   29.91    2.66
   4   0 -18   31.52    2.08
  -2   0  18    0.24    0.31
   2   0 -18    0.87    0.33
  -2   0  18   -0.48    0.46
   0   0  18  112.57    5.96
   2   0  18   11.02    1.75
   4   0  18   23.92    2.37
  -6   0 -18   14.53    0.95
   6   0  18   15.27    0.92
   6   0  18   12.81    1.91
   8   0  18   23.01    1.52
   8   0  18   26.04    2.43
  -8   0 -18   22.97    1.60
  10   0  18    0.85    0.69
  10   0  18    0.87    0.49
  11  -1 -18   -0.24    0.46
 -11  -1  18   -0.19    0.42
  11   1 -18    0.63    0.76
 -11   1  18    0.02    0.33
   9  -1 -18    5.34    1.31
  -9  -1  18    5.64    1.21
  -9   1  18    5.24    1.52
   9   1 -18    6.60    1.32
  -7  -1  18   -0.12    0.57
   7  -1 -18    0.18    0.55
   7   1 -18   -0.24    0.39
  -7   1  18   -0.40    0.41
  -5  -1  18    3.33    0.98
  -5  -1  18    2.06    0.93
   5  -1 -18    2.32    0.77
  -5   1  18    2.34    1.00
   5   1 -18    2.71    0.79
  -5   1  18    2.77    0.81
  -3  -1  18   14.51    2.05
  -3  -1  18   18.25    1.55
   3  -1 -18   18.14    1.37
  -3   1  18   21.58    2.13
   3   1 -18   17.90    1.43
  -3   1  18   15.73    1.33
  -1  -1  18   60.89    4.06
  -1  -1  18   56.31    2.79
   1  -1 -18   69.16    2.46
  -1   1  18   63.44    4.06
  -1   1  18   64.54    2.53
   1  -1  18   10.88    1.96
   1   1  18    5.73    1.37
   3  -1  18   28.84    2.65
   3   1  18   30.32    2.65
   5  -1  18   24.99    2.43
  -5   1 -18   23.08    1.19
   5   1  18   23.70    2.41
  -5   1 -18   23.84    1.19
   7  -1  18    5.34    0.86
   7  -1  18    4.53    1.24
  -7  -1 -18    6.03    0.80
  -7   1 -18    5.94    0.85
   7   1  18    7.41    1.63
   7   1  18    5.19    0.60
   9  -1  18   11.78    1.83
   9  -1  18   10.67    1.36
   9   1  18   13.88    1.19
   9   1  18   11.54    1.86
  -9   1 -18    9.11    1.34
  11  -1  18    1.40    0.64
  11  -1  18    0.25    0.56
  11   1  18    1.64    0.92
  11   1  18    0.71    0.55
 -10  -2  18   10.27    1.59
  10  -2 -18   12.23    1.89
 -10   2  18   10.94    1.15
  10   2 -18   10.04    1.82
   8  -2 -18    6.42    1.38
  -8  -2  18    5.94    1.37
  -8   2  18    6.75    1.24
   8   2 -18    8.97    1.61
  -6  -2  18    2.51    0.83
   6  -2 -18    2.73    0.87
   6   2 -18    1.88    0.82
  -4  -2  18    6.63    1.39
   4  -2 -18    7.87    1.25
  -4  -2  18    7.53    1.35
  -4   2  18    5.97    0.98
  -4   2  18    7.86    1.50
   4   2 -18    8.47    1.33
  -2  -2  18    0.43    0.49
  -2  -2  18    1.60    0.92
   2  -2 -18    1.84    0.52
  -2   2  18    2.01    0.92
  -2   2  18    2.00    0.48
   2   2 -18    1.06    0.51
   0  -2  18   74.28    4.42
   0   2  18   69.59    4.24
   0   2 -18   66.19    3.04
   0   2 -18   68.22    3.05
   2  -2  18   -0.33    0.54
   2   2  18    0.52    0.60
  -2   2 -18   -0.10    0.16
  -2   2 -18    0.21    0.24
   4  -2  18   66.47    4.29
  -4   2 -18   68.78    2.99
   4   2  18   73.07    4.34
  -4   2 -18   68.04    2.92
   6  -2  18    0.29    0.53
  -6  -2 -18    0.47    0.25
  -6   2 -18    0.18    0.32
   6   2  18   -0.63    0.42
   8  -2  18    0.13    0.39
   8  -2  18    0.22    0.65
  -8  -2 -18   -0.22    0.39
  -8   2 -18   -1.19    0.37
   8   2  18    0.88    0.39
   8   2  18    0.11    0.65
  10  -2  18   10.73    1.59
  10  -2  18   10.05    1.72
  10   2  18    9.62    1.11
  10   2  18   10.09    1.90
   9  -3 -18    4.83    1.24
  -9  -3  18    5.06    1.06
  -9   3  18    5.09    1.11
   9   3 -18    5.27    1.32
   7  -3 -18    1.91    0.92
  -7  -3  18    1.56    0.80
   7   3 -18    0.06    0.61
  -7   3  18    1.60    0.79
   5  -3 -18   17.45    1.70
  -5  -3  18   17.18    2.33
  -5   3  18   20.55    2.04
   5   3 -18   16.14    1.79
  -3  -3  18    8.67    1.43
  -3  -3  18    9.92    1.64
   3  -3 -18   10.74    1.40
   3   3 -18   10.42    1.50
  -3   3  18   10.24    1.08
  -3   3  18   10.09    1.80
  -1  -3  18    1.34    0.94
  -1   3  18    0.30    0.67
   1   3 -18    1.19    0.54
  -1   3  18    1.14    0.43
   1   3 -18    1.22    0.46
  -1   3  18    0.92    0.33
   1  -3  18   28.76    2.54
  -1   3 -18   25.60    1.67
  -1   3 -18   20.77    1.54
   1   3  18   22.99    1.30
   1   3  18   22.53    1.47
   1   3  18   20.81    2.21
   3  -3  18   29.24    2.65
   3   3  18   33.89    2.84
   3   3  18   30.49    1.39
  -3   3 -18   33.80    1.99
  -3   3 -18   31.09    1.87
   3   3  18   32.15    1.42
   5  -3  18    4.55    1.27
  -5   3 -18    3.93    0.80
   5   3  18    3.94    0.57
   5   3  18    4.10    0.59
   5   3  18    3.29    1.04
  -5   3 -18    4.37    0.86
   7  -3  18    1.25    0.53
  -7  -3 -18    0.65    0.40
   7  -3  18    1.02    0.71
  -7   3 -18    1.27    0.51
   7   3  18    0.29    0.75
   7   3  18    0.82    0.41
   9  -3  18    1.84    0.73
  -9  -3 -18    1.79    0.73
   9  -3  18    0.18    0.54
   9   3  18    0.62    0.70
   9   3  18    1.81    0.59
  10  -4 -18    1.45    0.71
 -10  -4  18    0.54    0.58
 -10   4  18    0.17    0.44
  10   4 -18    0.81    0.65
  -8  -4  18    0.50    0.65
   8  -4 -18   -0.10    0.52
  -8   4  18    1.07    0.67
   8   4 -18    1.12    0.78
   6  -4 -18    2.12    0.76
  -6  -4  18    1.78    0.80
  -6   4  18    2.56    0.90
   6   4 -18    2.35    0.85
   4  -4 -18   -0.10    0.48
  -4  -4  18    0.27    0.53
  -4   4  18   -0.06    0.55
   4   4 -18    0.23    0.61
  -2  -4  18    1.69    0.85
  -2  -4  18    3.36    1.00
  -2   4  18    3.04    1.02
  -2   4  18    3.05    0.76
   2   4 -18    3.27    0.91
   0  -4  18    3.77    1.22
   0   4  18    3.47    1.17
   0   4  18    3.95    0.71
   0   4 -18    4.09    0.82
   0   4 -18    4.27    1.03
   0   4  18    4.02    0.82
   2  -4  18    0.41    0.66
  -2   4 -18    0.21    0.39
  -2   4 -18    0.28    0.46
   2   4  18    0.15    0.57
   2   4  18    0.27    0.35
   2   4  18    0.86    0.32
   4  -4  18    7.41    1.47
  -4   4 -18   11.71    1.56
   4   4  18   10.73    0.93
   4   4  18    9.17    0.96
  -4   4 -18    7.73    1.17
   4   4  18   11.01    1.95
   6  -4  18    0.69    0.67
   6   4  18   -0.39    0.46
   6   4  18    0.67    0.40
  -6   4 -18    0.62    0.51
   6   4  18    0.46    0.40
   8  -4  18    1.92    0.79
  -8  -4 -18    0.80    0.57
   8  -4  18    1.62    0.84
   8   4  18    1.84    0.63
   8   4  18    2.11    0.98
  10  -4  18    2.08    0.83
  10  -4  18    0.39    0.59
  10   4  18    1.87    0.74
  10   4  18    1.74    0.70
   9  -5 -18    1.52    0.78
  -9  -5  18    0.10    0.61
   9   5 -18    0.55    0.72
  -9   5  18    0.99    0.56
   7  -5 -18    7.13    1.43
  -7  -5  18    6.13    1.39
  -7   5  18    9.33    1.44
   7   5 -18    5.83    1.37
  -5  -5  18    2.86    1.11
   5  -5 -18    3.11    1.00
   5   5 -18    2.73    1.09
  -5   5  18    3.47    1.03
  -3  -5  18    0.67    0.72
  -3   5  18    0.73    0.63
   3   5 -18    1.53    0.84
  -1  -5  18   13.68    2.13
  -1   5  18   14.65    1.95
  -1   5  18   10.92    1.19
   1   5 -18   10.35    1.71
  -1   5  18   11.60    1.93
   1  -5  18    8.35    1.62
   1   5  18    9.04    1.75
   1   5  18    8.81    1.41
  -1   5 -18    8.90    1.52
   1   5  18    7.61    1.56
   3  -5  18    2.19    0.87
   3   5  18    2.14    0.54
   3   5  18    3.22    0.81
  -3   5 -18    1.53    0.73
   3   5  18    0.83    0.78
   5  -5  18    2.42    0.99
   5   5  18    2.90    0.83
   5   5  18    2.89    0.60
  -5   5 -18    3.45    0.91
   5   5  18    3.55    1.15
   7  -5  18   -0.06    0.53
  -7   5 -18    0.05    0.58
   7   5  18   -0.63    0.50
   7   5  18   -0.41    0.41
   9  -5  18    1.12    0.66
   9   5  18    0.29    0.55
   9   5  18    0.91    0.66
   6  -6 -18    2.07    0.81
  -6  -6  18    0.78    0.84
   6   6 -18    1.28    0.75
  -6   6  18    1.98    0.81
   4  -6 -18    0.99    0.49
  -4  -6  18    1.79    0.84
  -4   6  18    0.61    0.65
   4   6 -18    1.21    0.69
  -2  -6  18    0.65    0.67
  -2   6  18    0.24    0.59
  -2   6  18    0.77    0.68
   2   6 -18    1.25    0.84
   0  -6  18    0.05    0.54
   0   6  18    0.43    0.69
   0   6 -18   -0.29    0.60
   0   6  18   -0.09    0.54
   2  -6  18    5.85    1.38
   2   6  18    4.76    1.12
   2   6  18    4.10    1.17
  -2   6 -18    3.65    1.03
   4  -6  18    8.57    1.64
  -4   6 -18    9.86    1.72
   4   6  18   11.72    1.76
   4   6  18   11.10    2.05
   6  -6  18    7.96    1.48
   6   6  18   13.54    1.83
  -6   6 -18   10.03    1.78
   6   6  18   12.53    1.96
  -5  -7  18    0.40    0.62
   5   7 -18    0.09    0.70
  -5   7  18   -0.07    0.51
  -3  -7  18    6.25    1.41
   3   7 -18    5.91    1.38
  -3   7  18    5.91    1.58
  -3   7  18    4.81    1.20
  -1  -7  18    1.44    0.78
   1   7 -18    1.87    0.75
  -1   7  18    0.41    0.78
  -1   7  18    0.14    0.66
   1   7  18    3.06    1.06
   1   7  18    2.10    0.96
  -1   7 -18    1.20    0.78
   3  -7  18    4.11    1.27
   3   7  18    5.84    1.35
  -3   7 -18    3.55    1.07
   3   7  18    5.56    1.46
   5  -7  18   -0.34    0.43
   5   7  18    0.76    0.59
  -5   7 -18    0.27    0.57
   5   7  18    0.18    0.57
   0  -8  18   13.18    1.98
   0   8  18   12.14    2.00
   0   8 -18   12.08    1.96
   0   8  18   15.98    2.39
  10   0 -19   -0.37    0.51
 -10   0  19    0.37    0.49
   8   0 -19    1.04    0.71
  -8   0  19   -0.82    0.42
  -6   0  19   -0.06    0.52
   6   0 -19   -0.09    0.50
  -4   0  19    0.09    0.64
  -4   0  19   -0.04    0.45
   4   0 -19    0.36    0.42
  -2   0  19   -0.73    0.60
   2   0 -19    0.24    0.22
  -2   0  19    0.69    0.34
   0   0  19    1.26    0.72
   2   0  19   -0.07    0.49
   4   0  19    0.45    0.54
   6   0  19   -0.11    0.64
  -8   0 -19    0.10    0.31
   8   0  19    0.17    0.46
   8   0  19    0.04    0.26
  10   0  19   -0.32    0.37
 -10   0 -19   -1.11    0.55
  10   0  19   -0.20    0.40
  11  -1 -19    0.14    0.56
 -11  -1  19   -0.55    0.41
   9  -1 -19   -0.26    0.60
  -9  -1  19    0.25    0.63
   9   1 -19   -0.29    0.55
  -9   1  19   -0.49    0.40
  -7  -1  19   13.42    1.97
   7  -1 -19   15.72    1.65
   7   1 -19   14.87    1.64
  -7   1  19   16.76    2.20
  -5  -1  19   16.31    1.72
  -5  -1  19   14.27    2.22
   5  -1 -19   17.15    1.51
   5   1 -19   15.61    1.51
  -5   1  19   12.25    1.36
  -5   1  19    9.50    1.63
   3  -1 -19   11.55    0.99
  -3  -1  19    7.42    1.58
  -3  -1  19   11.15    1.19
  -3   1  19    9.44    1.04
  -3   1  19    8.91    1.61
   3   1 -19    9.53    1.00
  -1  -1  19    2.54    1.04
   1   1 -19    3.57    0.51
  -1   1  19    4.24    1.33
   1  -1  19    1.00    0.88
   1   1  19    1.30    0.89
   3  -1  19    0.51    0.56
   3   1  19   -0.01    0.64
   5  -1  19    0.42    0.65
   5   1  19    1.06    0.84
  -7  -1 -19    2.26    0.45
   7  -1  19    2.51    0.99
   7  -1  19    2.96    0.63
   7   1  19    1.67    0.93
  -7   1 -19    1.48    0.44
   9  -1  19    8.75    1.24
  -9  -1 -19    9.52    1.23
   9  -1  19    8.67    1.77
   9   1  19    9.22    1.13
   9   1  19   10.47    1.78
  -9   1 -19    8.84    1.24
  11  -1  19    1.65    0.57
  11  -1  19    2.23    0.97
  11   1  19    0.95    0.82
  10  -2 -19    4.92    1.28
 -10  -2  19    4.02    1.00
 -10   2  19    6.17    1.08
  10   2 -19    5.08    1.23
  -8  -2  19   10.93    1.83
   8  -2 -19    6.93    1.45
  -8   2  19    8.36    1.42
   8   2 -19    9.91    1.67
   6  -2 -19    1.94    0.96
  -6  -2  19    0.69    0.77
  -6   2  19   -0.66    0.38
   6   2 -19    0.71    0.59
   4  -2 -19   12.53    1.26
  -4  -2  19   10.88    1.66
  -4  -2  19   13.75    2.11
   4   2 -19   13.94    1.35
  -4   2  19   11.87    1.26
  -4   2  19   11.08    1.79
   2  -2 -19    5.27    0.78
  -2  -2  19    3.00    0.81
  -2  -2  19    3.28    1.12
  -2   2  19    3.23    1.00
   2   2 -19    3.68    0.69
  -2   2  19    3.69    0.64
   0  -2  19    7.90    1.78
   0   2 -19    8.36    0.75
   0   2  19    9.73    1.85
   0   2 -19    9.09    0.80
   2  -2  19    1.70    0.78
  -2   2 -19    3.51    0.39
  -2   2 -19    3.68    0.39
   2   2  19    2.67    0.90
   4  -2  19    0.62    0.57
  -4   2 -19    0.22    0.38
   4   2  19   -0.57    0.49
   6  -2  19   19.55    2.68
   6   2  19   15.86    0.83
  -6   2 -19   14.58    1.20
   6   2  19   18.11    0.90
   6   2  19   18.53    2.58
  -6   2 -19   17.60    1.23
   8  -2  19   17.64    1.42
   8  -2  19   16.01    2.15
  -8  -2 -19   11.43    1.14
   8   2  19   16.56    1.12
   8   2  19   13.66    2.14
  10  -2  19    2.47    0.93
  10   2  19    1.36    0.88
  10   2  19    1.05    0.50
   9  -3 -19    7.99    1.48
  -9  -3  19    5.66    1.24
   9   3 -19    7.83    1.50
  -9   3  19    5.84    1.18
  -7  -3  19   11.49    1.95
   7  -3 -19   10.12    1.57
   7   3 -19   13.50    1.90
  -7   3  19   13.56    2.00
  -5  -3  19    4.48    1.20
   5  -3 -19    5.04    1.05
   5   3 -19    4.39    1.10
  -5   3  19    4.98    1.20
   3  -3 -19    4.85    0.93
  -3  -3  19    4.71    1.34
  -3  -3  19    4.64    1.09
   3   3 -19    4.34    0.99
  -3   3  19    5.31    1.16
  -3   3  19    3.33    0.72
  -1  -3  19    8.38    1.68
  -1   3  19    7.54    0.98
  -1   3  19    5.65    1.39
   1   3 -19    5.50    0.94
   1   3 -19    6.78    1.06
  -1   3  19    5.76    0.64
   1  -3  19   10.31    1.92
   1   3  19   10.10    1.79
   1   3  19    8.16    0.53
  -1   3 -19    8.54    0.91
   1   3  19    9.40    0.59
  -1   3 -19    8.37    0.95
   3  -3  19    0.20    0.64
   3   3  19   -0.33    0.41
  -3   3 -19    0.82    0.37
  -3   3 -19   -0.02    0.32
   5  -3  19   12.46    1.91
  -5   3 -19   17.43    1.28
   5   3  19   14.68    2.19
  -5   3 -19   18.87    1.42
   5   3  19   16.02    0.91
   7  -3  19   -1.03    0.48
   7   3  19    1.20    0.88
  -7   3 -19    1.45    0.54
   7   3  19    0.47    0.32
   9  -3  19    8.25    1.47
  -9  -3 -19    5.03    0.97
   9   3  19    8.43    1.10
  -8  -4  19    7.39    1.56
   8  -4 -19    5.04    1.16
  -8   4  19    9.91    1.61
   8   4 -19    6.30    1.29
   6  -4 -19    1.99    0.78
  -6  -4  19    0.24    0.59
   6   4 -19    1.16    0.75
  -6   4  19    0.57    0.67
  -4  -4  19    3.42    1.22
   4  -4 -19    3.76    0.96
  -4   4  19    6.40    1.50
   4   4 -19    3.37    0.96
  -2  -4  19    0.66    0.56
   2   4 -19    1.38    0.70
  -2   4  19   -0.28    0.51
  -2   4  19    1.80    0.64
  -2   4  19    1.76    0.97
   0  -4  19    1.99    0.80
   0   4  19    2.09    0.98
   0   4  19    1.96    0.51
   0   4  19    1.62    0.50
   0   4 -19    1.59    0.73
   0   4 -19    2.94    0.78
   2  -4  19   15.94    2.27
   2   4  19   20.89    1.38
  -2   4 -19   22.45    1.75
   2   4  19   20.36    2.17
   2   4  19   20.35    1.27
  -2   4 -19   22.14    1.71
   4  -4  19   52.48    3.59
  -4   4 -19   50.86    2.88
   4   4  19   46.64    2.38
  -4   4 -19   51.23    2.91
   4   4  19   50.49    3.55
   4   4  19   48.11    2.34
   6  -4  19    0.31    0.56
   6   4  19    0.12    0.68
  -6   4 -19    0.00    0.43
  -6   4 -19    0.28    0.47
   6   4  19    0.47    0.33
   6   4  19    0.71    0.37
   8  -4  19    1.84    0.87
  -8  -4 -19    1.06    0.64
   8   4  19    1.54    0.87
   8   4  19    3.49    0.72
  -7  -5  19    1.94    0.95
   7  -5 -19    3.60    1.00
   7   5 -19    0.86    0.71
  -7   5  19    0.52    0.59
   5  -5 -19   -0.37    0.45
  -5  -5  19    0.27    0.72
  -5   5  19   -0.43    0.50
   5   5 -19    0.64    0.66
  -3  -5  19   10.02    1.88
   3   5 -19    9.32    1.63
  -3   5  19    9.72    1.74
  -1  -5  19    1.20    0.91
   1   5 -19    3.23    0.88
  -1   5  19    4.50    1.01
  -1   5  19    4.80    1.28
  -1   5  19    3.48    0.69
   1  -5  19    8.00    1.52
   1   5  19    9.30    1.68
   1   5  19    9.29    1.40
   1   5  19    9.82    1.22
  -1   5 -19    7.99    1.36
   3  -5  19    1.04    0.68
   3   5  19    1.29    0.56
   3   5  19    1.73    0.52
   3   5  19    0.53    0.74
  -3   5 -19    1.54    0.73
   5  -5  19   14.94    2.18
  -5   5 -19   18.86    1.88
   5   5  19   18.37    2.50
   5   5  19   16.18    1.48
   7  -5  19    0.59    0.53
  -7   5 -19    0.85    0.67
   7   5  19   -1.05    0.52
   7   5  19    1.21    0.57
  -6  -6  19    1.06    0.77
   6  -6 -19   -0.47    0.49
   6   6 -19   -0.21    0.57
  -6   6  19    0.82    0.69
  -4  -6  19    3.97    1.16
   4   6 -19    3.63    1.19
  -4   6  19    3.01    0.91
  -2  -6  19    0.30    0.72
  -2   6  19    0.90    0.60
  -2   6  19    1.80    0.83
   2   6 -19   -0.05    0.65
   0  -6  19    4.00    1.28
   0   6 -19    4.00    1.07
   0   6  19    4.26    1.27
   0   6  19    2.99    0.96
   2  -6  19    0.71    0.66
   2   6  19    0.28    0.62
   2   6  19    0.51    0.69
  -2   6 -19   -0.12    0.57
   4  -6  19    5.51    1.45
   4   6  19    4.79    1.06
  -4   6 -19    5.26    1.28
   4   6  19    5.88    1.51
   6  -6  19    7.18    1.43
  -6   6 -19    7.96    1.51
   6   6  19    7.28    1.54
  -3  -7  19    0.41    0.78
  -3   7  19    0.66    0.73
   3   7 -19    0.30    0.68
  -3   7  19    0.65    0.68
  -1  -7  19    9.06    1.76
  -1   7  19    7.07    1.52
  -1   7  19    8.12    1.63
   1   7 -19    7.11    1.42
   1  -7  19    0.61    0.72
   1   7  19    0.44    0.67
  -1   7 -19    0.82    0.57
   1   7  19    0.72    0.75
   3  -7  19   -0.31    0.42
   3   7  19    1.12    0.74
   3   7  19    0.21    0.74
  -3   7 -19    0.17    0.56
 -10   0  20    5.67    1.15
  10   0 -20    3.96    1.18
   8   0 -20    1.05    0.73
  -8   0  20    0.81    0.65
   6   0 -20   56.29    3.28
  -6   0  20   59.23    3.79
   4   0 -20   57.08    2.95
  -4   0  20   49.96    3.62
  -4   0  20   56.76    3.09
  -2   0  20    9.90    1.78
   2   0 -20   11.54    0.90
  -2   0  20   11.43    0.96
   0   0  20    2.78    1.21
   2   0  20   47.03    3.45
   4   0  20    3.70    1.26
   6   0  20    2.86    1.03
  -8   0 -20   12.04    0.99
   8   0  20   13.14    2.20
   8   0  20   11.00    0.91
  10   0  20    5.63    0.92
  10   0  20    5.00    1.31
  -9  -1  20    8.64    1.56
   9  -1 -20    7.20    1.42
  -9   1  20    9.65    1.61
   9   1 -20    7.26    1.41
  -7  -1  20   35.65    2.84
   7  -1 -20   38.49    2.68
   7   1 -20   38.20    2.68
  -7   1  20   36.71    2.80
  -5  -1  20    2.05    0.98
  -5  -1  20    0.34    0.59
   5  -1 -20    3.26    0.77
   5   1 -20    1.66    0.68
  -5   1  20    0.99    0.63
  -5   1  20    0.96    0.76
  -3  -1  20   38.69    3.11
  -3  -1  20   42.46    2.44
   3  -1 -20   38.06    2.07
   3   1 -20   36.95    2.16
  -3   1  20   38.22    2.20
  -3   1  20   38.26    3.05
  -1  -1  20    4.40    1.37
  -1   1  20    3.70    1.13
   1   1 -20    5.85    0.51
   1   1 -20    6.23    0.55
   1  -1  20   23.69    2.39
   1   1  20   14.55    2.15
   3  -1  20    5.95    1.51
   3   1  20    6.36    1.43
   5  -1  20    0.97    0.80
   5   1  20    0.83    0.77
   7  -1  20    3.73    1.13
   7   1  20    1.38    0.83
  -7   1 -20    3.09    0.50
  -9  -1 -20   14.32    1.28
   9  -1  20   15.11    2.15
   9  -1  20   16.24    1.32
   9   1  20   14.80    1.17
  -9   1 -20   20.07    1.47
   9   1  20   16.53    2.38
  10  -2 -20   -0.34    0.68
 -10  -2  20    0.44    0.55
 -10   2  20   -0.84    0.54
  10   2 -20    1.44    0.80
   8  -2 -20    5.22    1.19
  -8  -2  20    2.93    0.94
  -8   2  20    3.18    0.94
   8   2 -20    2.39    0.86
  -6  -2  20    5.04    1.28
   6   2 -20    7.39    1.30
  -6   2  20    7.41    1.48
  -4  -2  20    1.20    0.89
   4  -2 -20    1.35    0.53
  -4   2  20    0.80    0.49
   4   2 -20    0.58    0.54
  -4   2  20    1.07    0.78
  -2  -2  20   48.39    2.65
   2  -2 -20   49.42    2.29
  -2  -2  20   42.61    3.34
  -2   2  20   43.60    2.26
   2   2 -20   49.03    2.49
  -2   2  20   46.29    3.45
   0  -2  20   22.08    2.34
   0   2 -20   14.59    1.02
   0   2 -20   14.39    0.98
   0   2  20   15.39    2.48
   2  -2  20   -0.65    0.35
   2   2  20    0.64    0.82
   4  -2  20    5.56    1.32
  -4   2 -20    6.24    0.46
   4   2  20    8.31    1.60
   6  -2  20    2.78    1.17
  -6   2 -20    2.19    0.46
  -6   2 -20    2.51    0.46
   6   2  20    2.56    1.06
   8  -2  20    0.89    0.56
  -8  -2 -20    1.47    0.47
   8   2  20    1.90    0.95
   8   2  20    1.08    0.38
  -8   2 -20    0.84    0.56
  10  -2  20    5.40    0.98
  10  -2  20    4.09    1.20
  10   2  20    6.21    0.93
  10   2  20    4.50    1.20
  -9  -3  20    0.95    0.69
   9  -3 -20   -0.49    0.53
  -9   3  20   -0.14    0.50
   9   3 -20    0.57    0.64
   7  -3 -20    0.77    0.57
  -7  -3  20    2.38    0.99
   7   3 -20    0.70    0.60
  -7   3  20    0.44    0.60
  -5  -3  20    6.49    1.60
   5  -3 -20    5.06    1.12
  -5   3  20    5.72    1.23
   5   3 -20    5.92    1.09
  -3  -3  20   25.79    2.12
   3  -3 -20   26.69    1.87
  -3  -3  20   29.23    2.61
   3   3 -20   28.65    2.05
  -3   3  20   26.73    1.78
  -3   3  20   31.10    2.58
  -1  -3  20    1.04    0.80
   1   3 -20    1.60    0.57
  -1   3  20    1.80    0.40
   1   3 -20    2.06    0.65
  -1   3  20    3.00    1.23
  -1   3  20    1.64    0.44
   1  -3  20    9.43    1.77
  -1   3 -20   10.14    0.97
   1   3  20   10.42    1.86
  -1   3 -20   11.17    0.99
   3  -3  20   -0.30    0.60
  -3   3 -20    0.24    0.33
  -3   3 -20    0.26    0.29
   3   3  20    0.96    0.60
   5  -3  20    7.59    1.62
  -5   3 -20    7.79    1.05
  -5   3 -20    8.70    0.87
   5   3  20   10.63    1.98
   7  -3  20    4.41    1.32
   7   3  20    5.87    1.45
   7   3  20    8.41    0.72
   7   3  20    8.02    0.77
  -7   3 -20    8.28    1.20
   9  -3  20   -0.45    0.38
   9  -3  20    0.43    0.77
   9   3  20   -0.28    0.66
   9   3  20   -0.35    0.31
  -8  -4  20    2.67    1.13
   8  -4 -20    1.29    0.67
  -8   4  20    2.40    0.88
   8   4 -20    4.08    1.18
   6  -4 -20   -0.56    0.50
  -6  -4  20    1.06    0.82
   6   4 -20    1.02    0.72
  -6   4  20   -0.40    0.48
   4  -4 -20    0.24    0.48
  -4  -4  20   -0.42    0.72
  -4   4  20    1.35    0.83
   4   4 -20    1.04    0.52
  -2  -4  20    5.56    1.29
   2   4 -20    7.49    1.30
  -2   4  20    7.07    1.44
  -2   4  20    6.84    0.79
  -2   4  20    6.17    1.16
   0  -4  20    1.07    0.64
   0   4  20    1.06    0.36
   0   4 -20    0.47    0.49
   0   4  20    1.97    0.55
   0   4  20    1.98    0.95
   0   4 -20    0.58    0.53
   2  -4  20    2.45    0.93
   2   4  20    1.44    0.49
   2   4  20    1.44    0.36
  -2   4 -20    1.36    0.56
   2   4  20    0.52    0.74
  -2   4 -20    1.73    0.67
   4  -4  20    3.39    1.28
   4   4  20    1.78    0.41
   4   4  20    2.58    1.07
   4   4  20    2.89    0.51
  -4   4 -20    2.08    0.71
   6  -4  20    0.14    0.51
   6   4  20    1.49    0.70
   6   4  20    0.17    0.31
  -6   4 -20   -0.68    0.47
  -6   4 -20    0.36    0.43
   6   4  20    0.19    0.35
   8  -4  20    3.23    1.02
   8   4  20    1.85    0.45
  -8   4 -20    1.03    0.67
   8   4  20    1.23    0.90
   7  -5 -20    2.11    0.76
  -7  -5  20    4.90    1.31
  -7   5  20    3.95    1.08
   7   5 -20    3.49    1.01
  -5  -5  20    6.63    1.48
   5  -5 -20    6.82    1.36
  -5   5  20    7.55    1.52
   5   5 -20    5.86    1.30
  -3  -5  20    0.14    0.53
   3   5 -20    0.66    0.54
  -3   5  20    0.56    0.67
  -3   5  20    0.19    0.57
  -1  -5  20    1.61    0.73
  -1   5  20    2.42    0.83
   1   5 -20    0.97    0.62
  -1   5  20   -0.17    0.50
  -1   5  20    1.00    0.84
   1  -5  20    0.29    0.55
   1   5  20    0.12    0.58
  -1   5 -20    0.15    0.53
   1   5  20    0.32    0.47
   1   5  20    0.49    0.32
   3  -5  20    4.66    1.20
   3   5  20    6.88    1.00
   3   5  20    4.83    1.21
   3   5  20    5.12    0.81
  -3   5 -20    5.77    1.16
   5  -5  20    0.67    0.78
   5   5  20    0.10    0.66
   5   5  20    1.58    0.49
   5   5  20    0.42    0.41
  -5   5 -20    0.59    0.56
   7  -5  20   -0.02    0.58
   7   5  20   -0.55    0.37
  -7   5 -20    0.72    0.65
   7   5  20    1.39    1.10
   6  -6 -20    1.65    0.85
  -6  -6  20    0.44    0.65
  -6   6  20    0.88    0.65
   6   6 -20    2.56    1.00
  -4  -6  20    0.30    0.69
  -4   6  20    0.02    0.53
   4   6 -20    0.73    0.73
  -2  -6  20    7.80    1.56
   2   6 -20    6.29    1.37
  -2   6  20    9.18    1.58
  -2   6  20   11.04    1.89
   0   6  20   13.64    2.07
   0   6  20   13.30    1.84
   0   6 -20   10.58    1.69
   2  -6  20    4.91    1.39
   2   6  20    4.09    0.81
   2   6  20    4.24    1.72
  -2   6 -20    2.36    0.93
   2   6  20    5.65    1.13
   4  -6  20    1.57    0.98
   4   6  20   -0.11    0.46
   4   6  20    0.28    0.65
   4   6  20   -0.30    0.51
  -4   6 -20    0.00    0.55
   6   6  20   -0.38    0.51
   6   6  20    0.34    0.80
  -6   6 -20   -0.14    0.62
  -3  -7  20    1.76    0.97
   3   7 -20    3.56    1.07
  -3   7  20    4.52    1.15
  -3   7  20    2.21    1.01
  -1  -7  20   -0.35    0.48
  -1   7  20   -0.16    0.66
  -1   7  20   -1.04    0.51
   1   7 -20   -0.38    0.46
   1  -7  20    2.28    0.96
  -1   7 -20    0.81    0.68
   1   7  20    0.18    0.69
   1   7  20    2.73    1.11
   3  -7  20    0.89    0.72
  -3   7 -20    0.67    0.54
   3   7  20   -0.65    0.49
   3   7  20    0.13    0.65
  10   0 -21   -0.15    0.56
 -10   0  21   -0.19    0.48
  -8   0  21   -0.01    0.61
   8   0 -21   -0.17    0.49
   6   0 -21    0.81    0.55
  -6   0  21   -0.43    0.53
   4   0 -21   -0.03    0.36
  -4   0  21    0.07    0.39
  -4   0  21    0.18    0.65
   2   0 -21    0.21    0.29
  -2   0  21   -0.14    0.33
  -2   0  21    0.02    0.56
   0   0  21   -0.21    0.71
   2   0  21    0.54    0.50
   4   0  21    0.52    0.65
   6   0  21    0.76    0.78
   8   0  21   -0.02    0.52
  10   0  21   -0.66    0.74
  10   0  21   -0.08    0.38
  -9  -1  21    1.85    0.76
   9  -1 -21    2.37    0.79
   9   1 -21    0.94    0.67
  -9   1  21    2.51    0.93
  -7  -1  21    2.21    0.92
   7  -1 -21    0.30    0.57
  -7   1  21    1.06    0.62
   7   1 -21    0.65    0.58
  -5  -1  21   -0.51    0.55
   5  -1 -21    0.04    0.39
  -5  -1  21    0.48    0.49
   5   1 -21    1.19    0.65
  -5   1  21    0.17    0.55
  -5   1  21    1.10    0.56
   3  -1 -21    0.17    0.31
  -3  -1  21    0.66    0.39
  -3  -1  21   -0.68    0.49
  -3   1  21    1.01    0.39
   3   1 -21    0.49    0.28
  -3   1  21    0.85    0.64
  -1  -1  21    0.09    0.54
  -1   1  21    0.24    0.69
   1   1 -21    0.09    0.16
   1   1 -21    0.02    0.14
   1  -1  21    1.04    0.87
   1   1  21    0.75    0.85
   3  -1  21   14.77    2.19
   3   1  21   13.00    2.16
   5  -1  21   15.85    2.54
   5   1  21   12.53    2.17
   7  -1  21    0.53    0.65
  -7   1 -21    0.86    0.26
  -7   1 -21    0.36    0.21
   7   1  21    1.95    1.03
  -9  -1 -21    0.43    0.53
   9  -1  21    1.01    0.74
   9  -1  21    1.49    0.38
  -9   1 -21    1.45    0.99
   9   1  21    1.71    0.40
   9   1  21    0.18    0.95
   8  -2 -21   11.04    1.72
  -8  -2  21   12.10    1.94
   8   2 -21    9.22    1.62
  -8   2  21    8.40    1.48
   6  -2 -21    2.54    1.03
  -6  -2  21    5.89    1.48
  -6   2  21    3.65    1.20
   6   2 -21    1.85    0.79
  -4  -2  21    0.09    0.64
   4  -2 -21    0.79    0.52
  -4  -2  21    1.47    0.57
   4   2 -21    0.51    0.48
  -4   2  21    0.39    0.39
  -4   2  21    0.62    0.72
  -2  -2  21   -0.72    0.53
  -2  -2  21    0.49    0.40
  -2   2  21   -0.15    0.26
  -2   2  21    0.17    0.64
   2   2 -21    0.11    0.25
   0  -2  21   15.70    2.42
   0   2 -21   17.54    1.03
   0   2  21   19.49    2.70
   2  -2  21   31.00    2.86
   2   2  21   25.21    2.59
   4  -2  21   -0.20    0.46
   4   2  21    0.97    0.76
   6  -2  21    1.71    0.94
   6   2  21    2.50    1.04
   8  -2  21    0.22    0.63
   8   2  21    0.31    0.87
  -8   2 -21   -0.60    0.42
   9  -3 -21    0.00    0.52
  -9  -3  21   -0.02    0.50
   9   3 -21   -0.46    0.50
  -9   3  21   -0.46    0.49
   7  -3 -21    0.79    0.68
  -7  -3  21    0.31    0.73
  -7   3  21    0.07    0.53
   7   3 -21    0.89    0.57
   5  -3 -21    8.15    1.28
  -5  -3  21    4.83    1.23
   5   3 -21    8.58    1.37
  -5   3  21    7.53    1.51
  -3  -3  21    2.30    0.74
   3  -3 -21    2.93    0.74
  -3  -3  21    3.92    1.18
  -3   3  21    4.48    1.33
  -3   3  21    1.73    0.53
   3   3 -21    2.17    0.72
  -1  -3  21   18.61    2.65
  -1   3  21   19.73    1.15
   1   3 -21   20.55    1.49
   1   3 -21   17.61    1.34
  -1   3  21   22.42    2.36
   1  -3  21    7.79    1.65
  -1   3 -21    7.49    0.82
  -1   3 -21    6.81    0.74
   1   3  21   10.57    1.90
   3  -3  21   11.48    1.86
  -3   3 -21   13.78    1.02
   3   3  21   17.54    2.54
  -3   3 -21   14.55    0.99
   5  -3  21    0.26    0.74
  -5   3 -21    0.65    0.39
   5   3  21    1.04    0.77
  -5   3 -21    0.90    0.38
   7  -3  21    7.66    1.62
  -7   3 -21    8.32    1.07
  -7   3 -21    8.86    1.17
   7   3  21    7.65    0.56
   9  -3  21   -0.07    0.64
   9   3  21   -0.20    0.31
   9   3  21    1.23    0.84
   8  -4 -21   -0.65    0.40
  -8  -4  21   -0.35    0.53
  -8   4  21    0.40    0.63
   8   4 -21   -0.27    0.58
  -6  -4  21    2.36    1.01
   6  -4 -21    2.54    0.96
  -6   4  21    6.16    1.51
   6   4 -21    4.10    1.10
  -4  -4  21   18.42    2.67
   4  -4 -21   17.17    1.62
  -4   4  21   19.07    2.07
   4   4 -21   20.62    1.87
  -2  -4  21   38.13    3.13
  -2   4  21   36.74    2.28
   2   4 -21   44.61    3.78
  -2   4  21   35.73    2.92
   2   4 -21   37.03    2.45
  -2   4  21   33.31    2.02
   0  -4  21    0.73    0.72
   0   4  21   -0.49    0.54
   0   4 -21   -0.74    0.38
   0   4  21   -0.18    0.24
   0   4  21    0.21    0.32
   0   4 -21    0.61    0.49
   2  -4  21   13.96    2.21
  -2   4 -21   12.46    1.23
   2   4  21    9.87    0.75
   2   4  21    9.68    0.65
  -2   4 -21   10.69    1.10
   2   4  21   16.08    2.42
   4  -4  21    4.78    1.38
   4   4  21    6.39    1.55
   4   4  21    5.01    0.41
  -4   4 -21    6.35    0.96
  -4   4 -21    7.57    1.12
   6  -4  21    8.85    1.71
   6   4  21    6.89    0.63
  -6   4 -21    4.99    1.02
   6   4  21    6.83    0.63
  -6   4 -21    6.13    1.02
   6   4  21    6.25    1.64
   8  -4  21    2.97    1.00
   8   4  21    2.67    1.17
  -8   4 -21    2.46    0.85
   8   4  21    1.90    0.52
  -7  -5  21    0.77    0.67
   7  -5 -21    1.44    0.68
   7   5 -21    2.11    0.87
  -7   5  21    0.91    0.77
   5  -5 -21    2.62    0.89
  -5  -5  21    2.57    1.27
   5   5 -21    3.58    0.90
  -5   5  21    3.06    0.92
  -3  -5  21    0.56    0.76
  -3   5  21    0.86    0.68
   3   5 -21    0.32    0.63
  -3   5  21    1.21    0.89
  -1  -5  21   22.37    3.06
  -1   5  21   20.73    2.25
   1   5 -21   24.52    2.04
  -1   5  21   21.79    1.64
  -1   5  21   23.25    1.87
   1  -5  21   11.85    2.05
   1   5  21    8.25    0.91
   1   5  21   10.99    1.08
   1   5  21    7.99    1.64
  -1   5 -21   11.48    1.56
   3  -5  21    8.95    1.85
   3   5  21    8.60    0.80
  -3   5 -21    8.72    1.42
   3   5  21    7.92    1.54
   3   5  21    9.62    0.91
   5  -5  21    0.08    0.67
   5   5  21   -0.84    0.58
   5   5  21   -0.76    0.28
   5   5  21   -0.87    0.31
  -5   5 -21   -0.38    0.78
  -7   5 -21   16.05    1.65
   7   5  21   10.88    1.08
   7   5  21   14.68    2.28
  -4  -6  21    0.00    0.62
  -4   6  21   -0.24    0.57
   4   6 -21   -0.11    0.60
  -4   6  21    1.89    0.85
  -2  -6  21    1.00    0.73
  -2   6  21    3.35    1.18
  -2   6  21    4.29    1.08
   2   6 -21    1.29    0.76
   0  -6  21    3.11    1.02
   0   6 -21    2.57    0.88
   0   6  21    1.72    0.75
   0   6  21    2.81    1.00
   2  -6  21   19.39    2.56
  -2   6 -21   19.58    1.93
   2   6  21   20.97    1.72
   2   6  21   18.68    1.44
   2   6  21   16.84    2.42
   4  -6  21    1.02    0.86
  -4   6 -21    0.26    0.56
   4   6  21    0.84    0.77
   4   6  21   -0.09    0.44
  -1  -7  21    1.87    0.84
  -1   7  21    1.42    0.78
  -1   7  21    1.89    0.91
   1   7 -21    2.15    0.81
   1  -7  21   -0.38    0.59
   1   7  21   -0.11    0.56
   1   7  21   -0.29    0.68
  -1   7 -21   -0.31    0.54
  -8   0  22    1.19    0.75
   8   0 -22    0.29    0.55
   6   0 -22    0.19    0.47
  -6   0  22    1.17    0.83
  -4   0  22   18.64    2.63
   4   0 -22   16.23    1.35
  -4   0  22   17.05    1.43
  -2   0  22   14.40    2.45
   2   0 -22   12.03    0.69
  -2   0  22   11.46    0.81
   0   0  22    2.69    0.97
   2   0  22    2.77    0.94
   4   0  22   20.67    2.85
   6   0  22    8.98    1.84
   8   0  22    9.87    1.73
  -9  -1  22   13.67    1.85
   9  -1 -22   10.87    1.64
  -9   1  22   13.73    1.87
   9   1 -22   10.80    1.73
  -7  -1  22    0.08    0.60
   7  -1 -22    0.36    0.49
  -7   1  22    0.60    0.69
   7   1 -22    0.30    0.52
  -5  -1  22   11.49    1.87
   5  -1 -22   12.47    1.29
  -5  -1  22   12.20    1.38
  -5   1  22   14.34    2.19
   5   1 -22   13.71    1.32
  -5   1  22   11.85    1.31
  -3  -1  22   -0.11    0.73
   3  -1 -22    0.20    0.27
  -3  -1  22   -0.50    0.36
  -3   1  22   -0.28    0.50
   3   1 -22    1.02    0.35
  -3   1  22    0.61    0.38
  -1  -1  22    0.51    0.74
  -1   1  22    0.73    0.75
   1  -1  22    1.46    0.75
   1   1  22    1.59    0.92
   3  -1  22   31.64    2.88
   3   1  22   31.17    2.86
   5  -1  22    0.41    0.72
   5   1  22    0.68    0.62
   7  -1  22   11.78    2.08
   7   1  22   11.85    1.85
   9   1  22    2.24    0.94
  -8  -2  22   19.04    2.02
   8  -2 -22   16.70    1.71
  -8   2  22   12.55    1.90
   8   2 -22   19.36    1.89
  -6  -2  22   15.72    2.24
   6  -2 -22   17.68    1.67
   6   2 -22   22.04    1.85
  -6   2  22   21.22    2.12
  -4  -2  22   -0.30    0.58
  -4  -2  22    0.12    0.48
   4  -2 -22    0.02    0.36
  -4   2  22    0.30    0.37
   4   2 -22    0.34    0.47
  -4   2  22    0.67    0.76
  -2  -2  22   -0.21    0.67
  -2   2  22    0.61    0.63
  -2   2  22    0.24    0.31
   2   2 -22   -0.01    0.20
   0  -2  22    0.60    0.65
   0   2  22    0.04    0.55
   0   2 -22    0.01    0.16
   0   2 -22   -0.05    0.14
   2  -2  22    4.64    1.45
   2   2  22    2.94    1.20
   4   2  22    2.55    1.18
   6  -2  22    1.48    0.93
   6   2  22    2.75    1.02
   8  -2  22   25.28    2.48
  -8   2 -22   22.63    1.56
   8   2  22   21.92    2.31
  -8   2 -22   23.62    1.43
  -7  -3  22   -0.20    0.54
   7  -3 -22    0.33    0.48
   7   3 -22    0.67    0.62
  -7   3  22   -0.03    0.55
   5  -3 -22    9.45    1.31
  -5  -3  22   11.21    2.01
   5   3 -22    8.29    1.31
  -5   3  22   10.10    1.81
   3  -3 -22    0.07    0.31
  -3  -3  22    1.34    0.59
  -3  -3  22   -0.25    0.62
   3   3 -22    0.05    0.45
  -3   3  22   -0.82    0.33
  -3   3  22    0.43    0.79
  -1  -3  22    3.26    1.20
   1   3 -22    2.45    0.63
  -1   3  22    2.37    0.44
  -1   3  22    3.07    0.64
  -1   3  22    4.40    1.36
   1   3 -22    3.23    0.68
   1  -3  22   13.09    2.39
  -1   3 -22    8.88    0.79
   1   3  22   12.83    2.06
  -1   3 -22    9.95    0.82
   3  -3  22    0.32    0.57
   3   3  22   -0.04    0.62
  -3   3 -22    0.46    0.27
  -3   3 -22    0.23    0.23
   5  -3  22    1.85    0.93
  -5   3 -22    2.73    0.53
  -5   3 -22    2.28    0.49
   5   3  22    2.51    1.06
   7  -3  22    8.11    1.71
  -7   3 -22    9.50    1.02
   7   3  22   10.39    1.99
  -7   3 -22    9.70    0.95
   6  -4 -22    1.93    0.72
  -6  -4  22    1.63    1.38
   6   4 -22    0.51    0.62
  -6   4  22   -0.07    0.54
  -4  -4  22    0.10    0.65
   4  -4 -22    0.77    0.47
   4   4 -22    0.56    0.49
  -4   4  22    0.07    0.60
  -2  -4  22    1.03    0.87
  -2   4  22    1.64    0.84
  -2   4  22   -0.92    0.35
  -2   4  22    0.33    0.36
   2   4 -22    0.49    0.41
   0  -4  22   -0.66    0.63
   0   4 -22    0.40    0.43
   0   4 -22   -0.55    0.60
   0   4  22    0.07    0.80
   2  -4  22    2.36    0.99
  -2   4 -22    2.14    0.57
   2   4  22    2.41    1.00
  -2   4 -22    4.07    0.71
   4  -4  22   -0.36    0.61
  -4   4 -22   -0.53    0.38
  -4   4 -22    0.05    0.32
   6  -4  22    0.83    0.78
  -6   4 -22    0.43    0.99
   6   4  22    1.37    0.71
  -6   4 -22   -0.04    0.43
   5  -5 -22    0.80    0.51
  -5  -5  22    1.14    0.89
   5   5 -22    0.26    0.58
  -5   5  22    1.51    0.75
  -3  -5  22    8.26    1.78
  -3   5  22    8.87    1.40
  -3   5  22    7.74    1.72
   3   5 -22    7.50    1.38
  -1  -5  22    2.40    0.98
   1   5 -22    2.57    0.76
  -1   5  22    3.01    1.23
  -1   5  22    3.47    0.88
   1   5  22   -0.60    0.32
   1   5  22   -0.30    0.61
  -1   5 -22    0.11    0.46
   1   5  22    0.83    0.32
   3  -5  22    1.38    1.18
   3   5  22    3.24    0.56
   3   5  22    6.39    1.56
  -3   5 -22    2.95    0.83
   3   5  22    3.99    0.56
   5  -5  22    2.11    0.88
  -5   5 -22    5.66    1.65
   5   5  22    5.58    1.49
   5   5  22    3.56    0.57
  -4  -6  22    4.51    1.42
  -4   6  22    2.69    1.08
   4   6 -22    4.28    0.99
  -4   6  22    1.64    0.94
  -2  -6  22    0.28    0.60
  -2   6  22   -0.85    0.55
  -2   6  22    0.38    0.66
   2   6 -22   -0.26    0.46
   0  -6  22    0.45    0.62
   0   6 -22    0.95    0.64
   0   6  22    2.42    0.67
   0   6  22   -0.60    0.46
   2  -6  22   -0.12    0.58
  -2   6 -22   -0.39    0.50
   2   6  22    0.72    0.81
   2   6  22   -0.27    0.45
   4  -6  22   -0.22    0.49
   4   6  22    0.02    0.65
   4   6  22    0.62    0.44
  -4   6 -22   -0.11    0.50
   8   0 -23   -0.49    0.42
  -8   0  23    0.85    0.62
   6   0 -23    0.10    0.78
  -6   0  23    0.71    0.80
  -4   0  23    0.34    0.57
   4   0 -23    0.12    0.34
  -4   0  23   -1.06    0.37
  -2   0  23   -0.71    0.46
   0   0  23    0.03    0.52
   2   0  23    0.12    0.60
   4   0  23    1.07    0.76
   6   0  23   -0.11    0.48
   8   0  23   -0.14    0.59
  -7  -1  23    0.29    0.71
   7  -1 -23    0.99    0.63
  -7   1  23    1.35    0.77
   7   1 -23    0.05    0.50
  -5  -1  23   -0.96    0.46
   5  -1 -23    0.18    0.40
  -5  -1  23    0.16    0.55
  -5   1  23   -0.19    0.42
   5   1 -23    0.28    0.39
  -5   1  23   -0.68    0.36
  -3  -1  23   11.00    1.05
  -3  -1  23    8.91    1.72
   3  -1 -23   11.02    0.86
  -3   1  23   11.07    0.96
  -3   1  23   13.62    2.37
   3   1 -23   10.05    0.88
  -1  -1  23   10.84    2.11
  -1   1  23    8.28    1.63
   1  -1  23    0.53    0.63
   1   1  23    2.09    0.99
   3  -1  23    0.97    0.74
   3   1  23    1.70    0.90
   5  -1  23   -0.31    0.64
   5   1  23    0.31    0.56
   7  -1  23    0.23    0.71
   7   1  23    0.27    0.38
  -8  -2  23    1.22    0.89
   8  -2 -23    1.40    0.70
   8   2 -23    1.19    0.62
  -8   2  23    1.13    0.73
  -6  -2  23    1.73    0.89
   6  -2 -23    1.93    0.64
   6   2 -23    0.35    0.62
  -6   2  23    2.34    0.96
  -4  -2  23   14.92    1.57
  -4  -2  23   13.71    2.31
   4  -2 -23   17.80    1.39
  -4   2  23   18.42    1.42
   4   2 -23   20.44    1.55
  -4   2  23   21.42    2.23
  -2  -2  23    0.55    0.81
   2   2 -23   -0.38    0.31
   2   2 -23   -0.01    0.25
  -2   2  23   -0.68    0.49
  -2   2  23   -0.12    0.16
   0  -2  23   13.73    2.30
   0   2  23    7.85    1.69
   2  -2  23    1.70    0.95
   2   2  23    1.23    1.04
   4  -2  23    0.28    0.57
   4   2  23    0.37    0.66
   6  -2  23    0.92    0.75
   6   2  23    2.47    0.97
   8  -2  23    1.26    0.87
   8   2  23    0.79    0.80
   7  -3 -23    5.05    1.09
   7   3 -23    4.96    1.07
  -7   3  23    4.52    1.23
   5  -3 -23    4.00    0.85
  -5  -3  23    3.27    1.01
   5   3 -23    4.78    1.04
  -5   3  23    5.75    1.42
  -3  -3  23    3.75    1.29
  -3  -3  23    2.23    0.88
  -3   3  23    4.79    1.21
   3   3 -23    5.84    0.97
  -3   3  23    4.79    0.78
  -1  -3  23    2.40    0.95
  -1   3  23    3.91    1.33
   1   3 -23    2.00    0.52
   1   3 -23    3.53    0.61
   1  -3  23    5.16    1.40
   1   3  23    5.83    1.50
  -1   3 -23    6.84    0.65
  -1   3 -23    7.27    0.63
   3  -3  23    3.20    0.90
   3   3  23    1.32    0.79
  -3   3 -23    3.34    0.37
   5  -3  23    0.35    0.56
   5   3  23   -0.17    0.66
   7  -3  23   -0.80    0.48
  -7   3 -23    0.73    0.38
   7   3  23    0.97    0.72
   6  -4 -23    1.19    0.63
  -6  -4  23    0.75    0.86
  -6   4  23    1.77    0.85
   6   4 -23    0.96    0.64
   4  -4 -23   19.08    1.57
  -4  -4  23   18.47    2.77
   4   4 -23   18.87    1.74
  -4   4  23   20.55    2.24
  -2  -4  23    0.13    0.64
   2   4 -23    1.33    0.94
   2   4 -23   -0.51    0.34
  -2   4  23   -1.04    0.53
  -2   4  23   -0.16    0.36
  -2   4  23   -0.47    0.31
   0  -4  23    6.95    1.66
   0   4 -23    7.43    1.56
   0   4 -23    5.88    0.98
   0   4  23    6.92    1.70
   2  -4  23    3.01    1.10
  -2   4 -23    3.44    0.66
  -2   4 -23    3.25    0.65
   2   4  23    6.89    1.75
   4  -4  23    6.39    1.92
  -4   4 -23    7.64    0.86
  -4   4 -23    6.97    0.91
   4   4  23    6.35    1.47
   6  -4  23    1.46    0.76
  -6   4 -23    1.92    0.63
   6   4  23    2.90    1.00
  -5  -5  23   11.97    2.06
   5  -5 -23   14.72    1.56
   5   5 -23   10.17    1.59
  -5   5  23   15.82    2.19
  -3  -5  23    2.06    0.86
  -3   5  23    2.65    0.98
  -3   5  23    2.59    0.90
   3   5 -23    3.30    0.90
  -1  -5  23    2.17    1.13
  -1   5  23    1.61    0.56
  -1   5  23    1.13    0.90
  -1   5  23    0.04    0.48
   1   5 -23    1.16    0.54
   1  -5  23    8.75    1.72
  -1   5 -23   13.21    1.39
   1   5  23   12.55    0.96
   1   5  23   13.90    2.33
   1   5  23   11.18    0.85
   3  -5  23    1.98    0.92
   3   5  23    2.33    0.36
  -3   5 -23    2.20    0.70
   3   5  23    1.98    1.00
   5  -5  23   -0.73    0.45
   5   5  23   -0.64    0.30
  -5   5 -23   -0.19    0.48
   5   5  23    0.19    0.56
  -2  -6  23    0.25    0.65
   2   6 -23    0.71    0.67
  -2   6  23   -0.05    0.66
   0  -6  23    7.20    1.56
   0   6  23    8.48    1.65
   0   6  23   12.02    1.45
   0   6 -23    7.02    1.28
   2  -6  23   -0.50    0.58
   2   6  23   -0.12    0.44
   2   6  23   -1.14    0.43
  -2   6 -23   -0.10    0.54
   8   0 -24    6.43    1.18
  -8   0  24    5.44    1.29
  -6   0  24    1.38    0.86
   4   0 -24    0.07    0.28
  -4   0  24   -0.32    0.40
  -4   0  24    0.27    0.47
  -2   0  24   15.94    2.43
   0   0  24   40.68    3.36
   2   0  24    2.49    0.93
   4   0  24    2.94    1.05
   6   0  24   18.50    2.62
   8   0  24    6.97    1.52
  -7  -1  24    1.34    0.77
   7  -1 -24   -0.26    0.42
   7   1 -24    0.44    0.49
  -7   1  24    0.64    0.76
  -5  -1  24   -0.08    0.60
   5  -1 -24    2.21    0.60
  -5  -1  24    1.45    1.03
  -5   1  24    0.93    0.76
   5   1 -24    1.96    0.64
  -5   1  24    0.42    0.54
  -3  -1  24   13.04    2.08
   3  -1 -24   14.25    0.96
  -3  -1  24   12.89    1.15
   3   1 -24   15.53    1.06
  -3   1  24   15.13    2.37
  -3   1  24   15.43    1.04
  -1  -1  24    0.02    0.63
  -1   1  24   -0.23    0.49
   1  -1  24   23.46    2.58
   1   1  24   27.88    2.63
   3  -1  24    0.05    0.77
   3   1  24   -0.69    0.54
   5  -1  24    9.62    2.01
   7  -1  24    6.50    1.52
   7   1  24    7.56    1.58
   6  -2 -24    0.30    0.50
  -6  -2  24    1.30    0.71
   6   2 -24    1.19    0.56
  -6   2  24    0.61    0.74
  -4  -2  24    4.90    1.33
  -4  -2  24    3.88    0.87
   4  -2 -24    5.86    0.85
  -4   2  24    3.58    0.76
  -4   2  24    4.93    1.34
   4   2 -24    5.75    0.92
  -2  -2  24   -0.63    0.56
  -2   2  24   -0.48    0.56
   2   2 -24    0.26    0.26
   2   2 -24   -0.22    0.32
   0  -2  24    3.07    1.24
   0   2  24    4.55    1.34
   2  -2  24   21.82    3.00
   2   2  24   22.62    2.45
   4  -2  24   15.57    2.43
   6  -2  24    0.93    0.89
   6   2  24    1.58    0.97
   5  -3 -24    1.84    0.72
  -5  -3  24    3.17    1.10
  -5   3  24    4.37    1.17
   5   3 -24    1.88    0.67
  -3  -3  24    0.22    0.67
  -3   3  24    0.15    0.33
  -3   3  24   -0.27    0.32
   3   3 -24    0.03    0.37
  -3   3  24    0.10    0.59
  -1  -3  24    2.57    1.10
   1   3 -24    3.84    0.63
  -1   3  24    4.16    1.32
   1   3 -24    3.13    0.62
   1  -3  24   19.33    2.70
  -1   3 -24   20.46    1.01
   1   3  24   18.36    2.70
  -1   3 -24   19.23    0.96
   3   3  24    0.69    0.79
   5  -3  24    7.49    1.58
   5   3  24    8.01    1.87
  -4  -4  24   -0.51    0.47
  -4   4  24    2.69    1.08
   4   4 -24    0.54    0.59
  -2  -4  24    2.53    1.26
   2   4 -24    1.77    0.62
  -2   4  24    1.61    0.49
  -2   4  24    1.14    0.80
  -2   4  24    2.59    0.42
   2   4 -24    1.77    0.57
   0  -4  24    1.33    0.71
   0   4 -24   -0.19    0.46
   0   4  24    0.62    0.72
   0   4 -24    1.37    0.50
   2  -4  24    0.59    0.80
  -2   4 -24    0.61    0.47
  -2   4 -24    0.37    0.32
   2   4  24    0.96    0.90
   4  -4  24    1.79    1.02
  -4   4 -24    1.19    0.39
   4   4  24    0.82    0.77
  -3  -5  24    1.17    0.91
   3   5 -24    1.76    0.71
  -3   5  24    1.30    0.63
  -3   5  24    1.18    0.83
  -1  -5  24    3.42    1.19
   1   5 -24    3.37    0.82
  -1   5  24    3.36    0.67
  -1   5  24    2.39    1.07
   1  -5  24   -0.20    0.58
  -1   5 -24    0.57    0.48
   1   5  24    0.47    0.75
   1   5  24    0.16    0.26
   3  -5  24    0.56    0.72
  -3   5 -24    2.00    0.69
   3   5  24    0.76    0.87
  -6   0  25    0.42    0.58
  -4   0  25   -0.81    0.57
   4   0 -25   -0.02    0.30
  -4   0  25   -0.16    0.33
  -2   0  25    1.14    0.85
   0   0  25    1.32    0.81
   2   0  25    0.19    0.53
   4   0  25    0.20    0.64
   6   0  25    0.27    0.61
  -7  -1  25    4.96    1.30
   7  -1 -25    4.67    0.96
   7   1 -25    2.53    0.77
  -7   1  25    4.72    1.24
  -5  -1  25    0.07    0.51
   5  -1 -25    1.38    0.55
  -5  -1  25   -0.20    0.63
  -5   1  25    0.66    0.75
   5   1 -25    0.49    0.39
  -5   1  25   -0.06    0.52
   3  -1 -25    0.17    0.16
  -3  -1  25   -0.21    0.29
  -3  -1  25    2.07    0.79
   3   1 -25    0.25    0.26
  -3   1  25   -0.02    0.64
  -1  -1  25    1.51    0.91
  -1   1  25    0.51    0.72
   1  -1  25    0.55    0.82
   1   1  25    0.75    0.62
   3   1  25    0.21    0.92
   5  -1  25   -0.26    0.59
   5   1  25   -0.54    0.48
   7  -1  25    4.51    1.25
   7   1  25    4.12    1.26
  -6  -2  25    7.47    1.62
   6  -2 -25    4.96    1.54
  -6   2  25    5.19    1.35
   6   2 -25    7.20    1.19
  -4  -2  25    9.41    2.93
   4  -2 -25    5.77    0.79
  -4   2  25    5.13    0.83
   4   2 -25    5.95    0.96
  -4   2  25    5.33    1.40
  -2  -2  25    2.31    1.07
   2   2 -25    1.97    0.46
  -2   2  25    1.35    0.89
   2   2 -25    2.39    0.41
   0  -2  25    0.78    0.91
   0   2  25    0.72    0.67
   2  -2  25    0.39    0.76
   2   2  25    2.28    1.62
   4  -2  25    3.44    1.41
   4   2  25    2.04    0.93
   6  -2  25    8.44    1.80
   6   2  25    4.63    1.15
   5  -3 -25    1.98    0.58
  -5  -3  25    2.74    1.03
  -5   3  25    2.42    1.04
   5   3 -25    1.97    0.71
  -3  -3  25    7.41    1.73
  -3   3  25    4.91    1.27
   3   3 -25    6.47    1.00
   3   3 -25    7.66    1.04
  -3   3  25    6.81    0.78
  -3   3  25    6.27    0.78
  -1  -3  25   -0.21    0.88
   1   3 -25    1.55    0.40
   1   3 -25    1.14    0.34
  -1   3  25    1.31    0.95
   1  -3  25    0.77    0.64
   1   3  25    3.14    1.22
   3  -3  25    2.59    1.21
   3   3  25    1.96    0.99
   5  -3  25    4.26    1.33
   5   3  25    3.86    1.15
  -4  -4  25    0.48    0.67
   4   4 -25    0.44    0.50
  -4   4  25    0.26    0.58
  -2  -4  25    4.47    1.39
   2   4 -25    4.85    0.85
  -2   4  25    4.27    1.94
  -2   4  25    5.36    0.68
   0  -4  25    5.11    1.27
   0   4  25    4.26    1.21
   0   4 -25    4.35    0.72
   2  -4  25    7.45    1.72
   2   4  25   10.82    2.05
  -2   4 -25    7.32    0.73
   4  -4  25    2.41    1.05
   4   4  25    2.79    1.05
  -6   0  26   31.10    3.26
   6   0 -26   39.44    2.58
  -4   0  26   -0.41    0.34
   4   0 -26    0.08    0.26
  -4   0  26   -0.03    0.70
  -2   0  26    3.66    1.15
   0   0  26   13.69    3.23
   2   0  26    6.49    1.44
   4   0  26    0.06    0.54
   6   0  26    2.62    1.08
   5  -1 -26    7.96    1.01
  -5  -1  26   10.22    2.05
  -5   1  26    7.06    1.65
   5   1 -26    8.98    1.01
  -3  -1  26    3.53    1.54
  -3   1  26    2.18    1.05
  -1  -1  26    8.39    2.07
  -1   1  26   11.47    2.48
   1  -1  26    0.03    0.51
   1   1  26    0.38    0.70
   3  -1  26    5.79    1.30
   3   1  26    7.62    1.68
   5  -1  26    2.27    1.02
   5   1  26    0.05    0.52
  -4  -2  26    8.23    1.83
   4  -2 -26    6.53    0.71
  -4   2  26    9.47    1.89
   4   2 -26    7.72    1.00
  -2  -2  26   14.95    2.39
  -2   2  26   10.55    2.06
   0  -2  26    2.26    1.02
   0   2  26    0.35    0.77
   2  -2  26    1.79    1.05
   2   2  26    1.92    1.02
   4  -2  26   -0.28    0.65
   4   2  26    1.41    0.94
  -3  -3  26    2.12    0.92
   3   3 -26    2.46    0.61
  -1  -3  26    4.12    1.19
   1   3 -26    4.95    0.59
   1   3 -26    5.14    0.55
  -1   3  26    4.11    1.26
   1  -3  26    1.88    0.91
   1   3  26    1.93    0.92
   3  -3  26   -0.41    0.48
   3   3  26    0.64    0.65
  -2  -4  26    0.74    0.59
  -2   4  26   -0.13    0.69
   2   4 -26    0.82    0.48
   0  -4  26    1.12    0.76
   0   4  26    0.90    0.75
   0   4 -26    2.50    0.49
   2  -4  26    0.05    0.63
   2   4  26    0.05    0.72
   4   0 -27   -0.62    0.25
  -4   0  27   -0.03    0.59
  -2   0  27   -0.67    0.56
   0   0  27    0.65    0.59
   2   0  27    0.08    0.63
   4   0  27   -0.08    0.52
  -3  -1  27   -0.32    0.61
  -3   1  27    0.07    0.89
  -1  -1  27   -0.57    0.49
  -1   1  27    0.32    0.74
   1  -1  27    3.66    1.23
   1   1  27    3.42    1.27
   3  -1  27    4.25    1.28
   3   1  27    3.23    1.17
  -2  -2  27    1.40    0.93
  -2   2  27    1.49    0.88
   0  -2  27    9.97    1.97
   0   2  27    6.51    1.42
   2  -2  27    1.12    0.59
   2   2  27    1.04    0.85
  -1  -3  27    6.06    1.64
  -1   3  27    5.38    1.42
   1  -3  27    1.85    1.05
   1   3  27    0.77    0.78
  -2   0  28    0.22    0.53
   0   0  28    0.24    0.57
   2   0  28    3.12    1.19
  -1  -1  28    1.99    1.00
  -1   1  28    1.27    0.82
   1  -1  28    0.97    0.76
   1   1  28    2.33    1.05
   0   0   0    0.00    0.00
;
_shelx_hkl_checksum   71553
